# Supplementary material for: Genetic associations between genes in the renin-angiotensin-aldosterone system and renal disease: a systematic review and meta-analysis
Source: PubMed Central journal article supplement (PMC6501980; doi:10.1136/bmjopen-2018-026777), 2019-05-01
Supplement: bmjopen-2018-026777.draft_revisions.pdf [file bmjopen-2018-026777.draft_revisions.pdf]

# BMJ Open

BMJ Open is committed to open peer review. As part of this commitment we make the peer review history of every article we publish publicly available.

When an article is published we post the peer reviewers' comments and the authors' responses online. We also post the versions of the paper that were used during peer review. These are the versions that the peer review comments apply to.

The versions of the paper that follow are the versions that were submitted during the peer review process. They are not the versions of record or the final published versions. They should not be cited or distributed as the published version of this manuscript.

BMJ Open is an open access journal and the full, final, typeset and author-corrected version of record of the manuscript is available on our site with no access controls, subscription charges or pay-per-view fees (<http://bmjopen.bmj.com>).

If you have any questions on BMJ Open's open peer review process please email [info.bmjopen@bmj.com](mailto:info.bmjopen@bmj.com)

# BMJ Open

## Genetic associations between genes in the renin-angiotensin-aldosterone system and renal disease: a systematic review and meta-analysis

|                               |                                                                                                                                                                                                                                                                                                                                                                                                                                                                                                                                                                                                   |
|-------------------------------|---------------------------------------------------------------------------------------------------------------------------------------------------------------------------------------------------------------------------------------------------------------------------------------------------------------------------------------------------------------------------------------------------------------------------------------------------------------------------------------------------------------------------------------------------------------------------------------------------|
| Journal:                      | <i>BMJ Open</i>                                                                                                                                                                                                                                                                                                                                                                                                                                                                                                                                                                                   |
| Manuscript ID                 | bmjopen-2018-026777                                                                                                                                                                                                                                                                                                                                                                                                                                                                                                                                                                               |
| Article Type:                 | Research                                                                                                                                                                                                                                                                                                                                                                                                                                                                                                                                                                                          |
| Date Submitted by the Author: | 19-Sep-2018                                                                                                                                                                                                                                                                                                                                                                                                                                                                                                                                                                                       |
| Complete List of Authors:     | Smyth, Laura; Queen's University Belfast Centre for Public Health, Epidemiology and Public Health Research Group<br>Cañadas-Garre, Marisa; Queen's University Belfast Centre for Public Health, Epidemiology and Public Health Research Group<br>Cappa, Ruaidhri; Queen's University Belfast Centre for Public Health, Epidemiology and Public Health Research Group<br>Maxwell, Alexander; Queen's University Belfast Centre for Public Health, Centre for Public Health; Belfast City Hospital, Regional Nephrology Unit<br>McKnight, Amy; Queen's University Belfast, Centre for Public Health |
| Keywords:                     | CKD, NEPHROLOGY, RAAS, Meta-analysis, Renin-angiotensin-aldosterone system, Kidney                                                                                                                                                                                                                                                                                                                                                                                                                                                                                                                |
|                               |                                                                                                                                                                                                                                                                                                                                                                                                                                                                                                                                                                                                   |

SCHOLARONE™  
Manuscripts

1  
2  
3 **1 Genetic associations between genes in the renin-angiotensin-aldosterone system and renal**  
4 **2 disease: a systematic review and meta-analysis**

5  
6 3 Laura J. Smyth<sup>1\*</sup>, Marisa Cañadas-Garre<sup>1</sup>, Ruaidhri C. Cappa<sup>1</sup>, Alexander P. Maxwell<sup>1,2</sup>, Amy Jayne  
7 4 McKnight<sup>1</sup>

8  
9 5 <sup>1</sup> Epidemiology and Public Health Research Group, Centre for Public Health, Queen's University  
10 6 Belfast, Belfast, United Kingdom

11 7 <sup>2</sup> Regional Nephrology Unit, Belfast City Hospital, Belfast, United Kingdom

12  
13 8 \*Corresponding author email: [lsmyth42@qub.ac.uk](mailto:lsmyth42@qub.ac.uk)  
14  
15 9

16  
17 **10 SHORT TITLE**

18  
19 11 A meta-analysis of RAAS gene variants and CKD  
20  
21 12

22 **13 WORD COUNT** (excluding Abstract, Key words, References, Figures, Tables, Statements and  
23 14 Contributions)

24  
25 15 3,016  
26  
27 16

28  
29 **17 ABSTRACT**

30  
31 *18 Background*

32 19 Chronic kidney disease (CKD) is defined by abnormalities in kidney structure and/or function present  
33 20 for more than three months. Worldwide, both the incidence and prevalence rates of CKD are  
34 21 increasing. The renin-angiotensin-aldosterone system (RAAS) regulates fluid and electrolyte balance  
35 22 through the kidney. RAAS activation is associated with hypertension, which is directly implicated in  
36 23 causation and progression of CKD. RAAS blockade, using drugs targeting individual RAAS mediators  
37 24 and receptors, has proven to be reno-protective.

38  
39 25 *Objectives*

40  
41 26 To assess genomic variants present within RAAS genes; *ACE*, *ACE2*, *AGT*, *AGTR1*, *AGTR2* and *REN*, for  
42 27 their association with CKD.  
43

44 28 *Design and Data Sources*

45  
46 29 A systematic review and meta-analysis of observational research was performed to evaluate the  
47 30 RAAS gene polymorphisms in CKD using both PubMed and Web of Science databases. Eligible  
48 31 articles included case-control studies of a defined kidney disease and included genotype counts.  
49

50 32 *Eligibility Criteria*

51 33 Any paper was removed from the analysis if it was not written in English or Spanish, was a non-  
52 34 human study, was a paediatric study, was not a case-control study, did not have a renal disease  
53 35 phenotype, did not include data for the gene of interest, was a gene expression based study or had a  
54 36 pharmaceutical drug focus.  
55  
56  
57  
58  
59  
60

## 37 *Results*

38 A total of 3,286 studies were identified, 108 of which met the inclusion criteria. Genetic variants  
39 which had been reported in at least three independent publications for populations with the same  
40 ethnicity were then determined and quantitative analyses subsequently performed.

41 Three variants returned significant results in populations with different ethnicities at  $P < 0.05$ ; *ACE*  
42 insertion, *AGT* rs699-T allele, and *AGTR1* rs5186-A allele; all had small effect sizes and each variant  
43 was associated with a reduced risk of CKD development.

## 44 *Conclusions*

45 Further biological pathway and functional analyses of the RAAS gene polymorphisms will help define  
46 how variation in components of the RAAS pathway contribute to CKD.

## 48 **Key words**

49 CKD, kidney, meta-analysis, RAAS, renin-angiotensin-aldosterone system

## 51 **ARTICLE SUMMARY**

### 52 **Strengths and limitations of the study**

- 53 • Strength: Individuals with microalbuminuria were excluded from both the case and control  
54 definitions to improve the discrimination between individuals with and without renal  
55 disease as microalbuminuria may regress, remain stable or progress to macroalbuminuria.
- 56 • Strength: Due to previously reported heterogeneity between different ethnic groups, we  
57 included this as a risk factor and performed each analysis per ethnicity.
- 58 • Limitation: Some studies in our search could not be included in quantitative analysis as they  
59 lacked information relating to genotype counts and had an unclear measure and definition  
60 of albuminuria for both cases and controls.

### 61 **Hypothesis statement**

- 62 • We hypothesise that there will be an association between genetic variants within RAAS  
63 genes and CKD.

## 64 **INTRODUCTION**

65 Chronic kidney disease (CKD) is defined as a progressive loss of renal function measured as a  
66 reduction in glomerular filtration rate (GFR) to  $< 60 \text{ mL/min/1.73m}^2$ , or the presence of persistent  
67 urinary abnormalities including albuminuria and/or structural alterations which have been present  
68 for at least three months(1). CKD is an increasing public health issue given its associated morbidities,  
69 premature mortality and management of advanced CKD is a significant burden on health care  
70 budgets worldwide(2,3). There is substantial evidence that inherited genetic variants(4), the  
71 presence of diabetes(5) or hypertension(6) and an individual's ethnicity(7,8) directly influence the  
72 development of various CKD phenotypes.

73 The renin-angiotensin-aldosterone system (RAAS) is a homeostatic endocrine system which is of  
74 critical importance to the regulation of blood pressure and maintenance of fluid and electrolyte  
75 balance(9,10). Renin, secreted from the juxtaglomerular apparatus in response to reduced renal



76 perfusion pressure, catalyses the conversion of angiotensinogen to angiotensin I(11). Subsequently,  
 77 angiotensin I converting enzyme (*ACE*) cleaves angiotensin I to generate angiotensin II, which  
 78 regulates heart and kidney function by binding to and activating angiotensin II receptors (type I and  
 79 type II)(11,12). The angiotensin II type I receptors are responsible for multiple biologic actions of  
 80 RAAS including vasoconstriction and sodium reabsorption(11–14).

81 Increased RAAS activation is linked to progression of CKD of different aetiologies, especially diabetic  
 82 nephropathy (DN)(11,15–18), and is mediated by hypertensive injury(15,17) and accelerated renal  
 83 fibrosis(19). The physiological relevance of this pathway in the progression of CKD has focused  
 84 attention on RAAS components including *ACE*, angiotensin I converting enzyme 2 (*ACE2*),  
 85 angiotensinogen (*AGT*), angiotensin II receptor type 1 (*AGTR1*), angiotensin II receptor type 2  
 86 (*AGTR2*) and renin (*REN*), as candidate genes for various CKD-related phenotypes. Multiple studies  
 87 have implicated RAAS gene variants in the progression of CKD(20–26).

88 This manuscript describes a systematic review and meta-analysis to examine published data  
 89 reporting genetic variants present within six of the RAAS candidate genes: *ACE*, *ACE2*, *AGT*, *AGTR1*,  
 90 *AGTR2* and *REN*, for a range of CKD phenotypes and ethnicities, to help define their putative roles as  
 91 risk factors for CKD.

92

## 93 METHODS

94 Search Strategy: A systematic search was undertaken following recognised methods, the Meta-  
 95 analysis of Observational Studies in Epidemiology (MOOSE) guidelines(27), by two investigators.  
 96 PubMed and Web of Science online databases were searched for studies between the inception of  
 97 each database and 31<sup>st</sup> December 2016. All search terms are detailed in Supplementary Table S1.  
 98 Reference lists from included publications were also manually searched. Two authors (LJS and MCG)  
 99 independently conducted the literature search, screened the articles and extracted the data. In the  
 100 case of any disagreement, a third author (RCC) considered the articles. A range of CKD phenotypes  
 101 were included in this analysis, the case and control definitions are included in Table 1.

102 **Table 1: Phenotypic comparisons included in this analysis**

| Case Group                                   | Control Group                      |
|----------------------------------------------|------------------------------------|
| Autosomal dominant polycystic kidney disease | Healthy controls                   |
| Atherosclerotic renal artery stenosis        | Healthy controls                   |
| Balkan endemic nephropathy                   | Healthy controls                   |
| Chronic glomerulonephritis                   | Healthy controls                   |
| Chronic kidney disease                       | Healthy controls                   |
| Diabetic nephropathy*                        | Diabetes mellitus                  |
| Diabetic nephropathy*                        | Healthy controls                   |
| End-stage renal disease                      | Healthy controls                   |
| End-stage renal disease                      | Type 1 diabetes mellitus           |
| Focal segmental glomerulosclerosis           | Healthy controls                   |
| Glomerulonephritis                           | Healthy controls                   |
| Hypertension-related renal disease           | Healthy controls with hypertension |
| Hypertension-related renal disease           | Healthy controls                   |
| IgA Nephropathy                              | Healthy controls                   |
| Interstitial nephritis                       | Healthy controls                   |
| Lupus nephritis                              | Systemic lupus erythematosus       |

|                                                               |                          |
|---------------------------------------------------------------|--------------------------|
| Lupus nephritis                                               | Healthy controls         |
| Minimal change nephrotic syndrome                             | Healthy controls         |
| Non-Balkan endemic nephropathy                                | Healthy controls         |
| Nephroangiosclerosis                                          | Healthy controls         |
| Polycystic kidney disease                                     | Healthy controls         |
| Primary membranous glomerulonephritis                         | Healthy controls         |
| Primary membranous glomerulonephritis                         | Organ donors             |
| Renal transplant recipients                                   | Healthy controls         |
| Renal transplant recipients                                   | Kidney Donors            |
| Type 1 diabetic nephropathy*                                  | Type 1 diabetes mellitus |
| Type 1 diabetic nephropathy linked to end-stage renal disease | Healthy controls         |
| Type 1 diabetic nephropathy linked to end-stage renal disease | Type 1 diabetes mellitus |
| Type 2 diabetic nephropathy*                                  | Type 2 diabetes mellitus |
| Type 2 diabetic nephropathy linked to end-stage renal disease | Healthy controls         |
| Type 2 diabetic nephropathy linked to end-stage renal disease | Type 2 diabetes mellitus |

103 \* In the studies including diabetic nephropathy as cases, only individuals with reported  
104 macroalbuminuria or proteinuria were included. Individuals with microalbuminuria were excluded.

105 Inclusion/Exclusion Criteria: Inclusion criteria were judged against a standardised list of agreed  
106 criteria (LJS, MCG and AJM), whereby the English or Spanish language publication described an adult,  
107 human case-control study, of a defined kidney disease. In the rare instances when suspected  
108 duplicate data was identified within two or more included articles, only the article either published  
109 first, or that with the larger number of participants was included.

110 Articles were excluded if they included paediatric subjects, were a pharmacological based study  
111 reporting clinical trials of medications, did not contain genotypic data for the correct gene or were  
112 non-human studies.

113 Data extraction: Where available, the size of each study, case group disease definition and number  
114 of individuals, control group definition and number of individuals, ethnicity, genetic variant,  
115 genotype in the format of allele one–heterozygote–allele two and allele counts were recorded and  
116 calculated in spreadsheets by two authors (LJS and MCG). Articles were re-assessed where any  
117 disagreement occurred and a third reviewer was employed. Ethnicities were recorded from the  
118 articles and re-coded following the International Genome Sample Resources' online guidance(28).  
119 Where any population did not align to a listed population code, a new one was created for the  
120 purposes of this study. All ethnicity codes are available in Supplementary Table S2. The data  
121 collected was divided into disease phenotype groups to ensure a high level of homogeneity.

122 Statistical Analysis: Each genetic variant which had been investigated and reported in at least three  
123 independent publications for the same ethnicity and phenotype was included in quantitative  
124 statistical analyses. Review Manager (RevMan) 5.3 (The Cochrane Collaboration, The Nordic  
125 Cochrane Centre, Copenhagen, Denmark) was employed to facilitate the analysis of allele  
126 frequencies. For each SNP, the total number of alleles were recorded per case and control group.  
127 Hardy Weinberg was calculated for all included studies. Statistical analyses were performed using  
128 the random effects model as heterogeneity was expected. For each SNP, this analysis provided the P  
129 value, odds ratio (OR) and 95% confidence intervals (CI). It also facilitated the assessment of the  
130 heterogeneity level using the  $I^2$  statistic(29). Forest plots and funnel plots were generated  
131 automatically to assess publication bias and the significance value was set at  $P < 0.05$  (LJS and RCC).

132 The quality of the studies was assessed by all available quality control measures including reported  
133 genotype completion rate, phenotype description, microalbuminuria exclusion and Hardy Weinberg

134 equilibrium. No sensitivity analysis was performed. All study methodology conformed to the MOOSE  
 135 criteria(27). No published protocol is available for this review. The workflow followed a consistent  
 136 pattern for each gene. A summary of this is included in Figure 1.

137 **Figure 1:** Workflow pattern

138

## 139 RESULTS

140 The database searches returned 3,286 results, 138 of which remained following the application of  
 141 inclusion and exclusion criteria and the removal of any SNP which was not reported on at least three  
 142 occasions. Several articles included data for more than one gene, signifying that they have emerged  
 143 multiple times throughout the database searches; the total number of individual articles was  
 144 therefore 108. The search strategies are included as Supplementary Figures S1a-f. All excluded  
 145 studies are listed in Supplementary Tables S3a-f

146 The total number of subjects analysed within these studies (n=108) was 17,782 individuals with renal  
 147 disease and 21,199 individuals acting as controls. For SNPs in three of the RAAS genes, *ACE2*, *AGTR2*  
 148 and *REN*, there were less than three independent populations studied. A summary table detailing  
 149 the main results is included as Table 2.

150 **Table 2: Summary of most significant result for each selected gene**

| Gene         | Articles returned (n) | Articles analysed (n) | Max. individuals in analysis (n) | Most significant result | P Value | OR (95% CL)       | I <sup>2</sup> (%) |
|--------------|-----------------------|-----------------------|----------------------------------|-------------------------|---------|-------------------|--------------------|
| <i>ACE</i>   | 366                   | 91                    | 32,666                           | I/D (EAS)               | 0.008   | 0.80 (0.67, 0.94) | 68                 |
| <i>ACE2</i>  | 1413                  | 0                     | NA                               |                         | NA      | NA                | NA                 |
| <i>AGT</i>   | 656                   | 31                    | 11,210                           | rs699 (EUR)             | 0.002   | 0.84 (0.76, 0.94) | 0                  |
| <i>AGTR1</i> | 191                   | 16                    | 6917                             | rs5186 (SAS)            | 0.001   | 0.71 (0.58, 0.87) | 37                 |
| <i>AGTR2</i> | 28                    | 0                     | NA                               |                         | NA      | NA                | NA                 |
| <i>REN</i>   | 632                   | 0                     | NA                               |                         | NA      | NA                | NA                 |

151 Abbreviations: EAS, East Asian; EUR, European; NA, Not Applicable; SAS, South Asian.

152

### 153 *ACE*

154 A total of 14 quantitative analyses were completed for the insertion / deletion (I/D) polymorphism  
 155 located within *ACE* in eight phenotypes, details of which are included in Supplementary Table S4.  
 156 Three quantitative analyses returned a significant result. The first analysis comprised 11  
 157 publications, each studying an East Asian population with T2DN (type 2 diabetes and nephropathy)  
 158 and compared with T2DM (type 2 diabetes mellitus without nephropathy). Figure 2a displays these  
 159 results, P= 0.009; OR= 0.74; 95% CI= 0.59, 0.93, I<sup>2</sup>= 55%, showing that the presence of the insertion  
 160 variant at this *ACE* locus was significantly associated with this phenotype. The insertion provides a  
 161 lower risk of developing T2DN in an East Asian population.

162 **Figure 2a:** *ACE* I/D investigation, individuals with type 2 diabetic nephropathy compared to  
 163 individuals with type 2 diabetes mellitus in an East Asian Population (*ACE* insertion variant compared  
 164 to deletion variant).

1  
2  
3 165 The *ACE* insertion variant was similarly significantly associated with a lower risk of T2DN compared  
4 166 with T2DM in a South Asian population, despite the presence of a high level of heterogeneity ( $P=$   
5 167  $0.01$ ;  $OR= 0.57$ ;  $95\% CI= 0.37, 0.87$ ;  $I^2= 89\%$ ). The comparison of East Asian individuals with end-stage  
6 168 renal disease (ESRD) compared to a healthy population with no evidence of renal disease also  
7 169 showed a significant association with moderate levels of heterogeneity ( $P= 0.008$ ;  $OR= 0.8$ ;  $95\% CI=$   
8 170  $0.67, 0.94$ ;  $I^2= 68\%$ ). These results are included as Figures 2b and 2c respectively.

9  
10 171 **Figure 2b:** *ACE* I/D investigation, individuals with type 2 diabetic nephropathy compared to  
11 172 individuals with type 2 diabetes mellitus in a South Asian Population (insertion compared to  
12 173 deletion).

13  
14 174 **Figure 2c:** *ACE* I/D investigation, individuals with end-stage renal disease compared to healthy  
15 175 controls in an East Asian Population (insertion compared to deletion).

16  
17 176 In each analysis (T2DN vs. T2DM; ESRD vs. normal), the presence of the *ACE* insertion was associated  
18 177 with a lower risk of developing the CKD phenotype in the respective populations. The non-significant  
19 178 results are included in Supplementary Figures S2a-S2k.

### 20 21 22 179 **AGT**

23 180 Seven quantitative analyses were completed for rs699, where the T allele was compared to the C  
24 181 allele. Details of each of these comparisons are included in Supplementary Table S5. One significant  
25 182 result was identified - the comparison of ESRD with healthy controls in a European population. The  
26 183 results were ( $P=0.002$ ;  $OR= 0.84$ ;  $95\% CI= 0.76, 0.94$ ;  $I^2= 0\%$ ) and are shown in Figure 2d. These  
27 184 results indicate that the presence of the T allele is associated with a lower risk of developing ESRD in  
28 185 this population. The non-significant results are included in Supplementary Figures S2l-S2q.

29  
30 186 **Figure 2d:** *AGT* rs699 investigation, individuals with end-stage renal disease compared to healthy  
31 187 controls in a European Population (*AGT* rs699 T allele compared to C allele).

### 32 33 34 188 **AGTR1**

35 189 Four quantitative analyses were performed for *AGTR1* rs5186, comparing the A allele with the C.  
36 190 Details of these comparisons are included within Supplementary Table S6. One of the four studies  
37 191 returned a significant result for association, the comparison of T2DN with T2DM in a South Asian  
38 192 population ( $P= 0.001$ ;  $OR= 0.71$ ;  $95\% CI= 0.58, 0.87$ ;  $I^2= 37\%$ ). This result is shown in Figure 2e. These  
39 193 results indicate that the presence of the A allele is associated with a lower risk of developing T2DN in  
40 194 this population. The non-significant results are included in Supplementary Figures S2r-S2t.

41  
42 195 **Figure 2e:** *AGTR1* rs5186 investigation, individuals with type 2 diabetic nephropathy compared to  
43 196 individuals with type 2 diabetes mellitus in a South Asian Population (*AGTR1* rs5186 A allele  
44 197 compared to C allele).

45  
46 198 All funnel plots for these analyses are included in Supplementary Figure S3. Only the plots for *ACE*  
47 199 I/D CKD in a South Asian population and *ACE* I/D T2DN in a European population showed a tendency  
48 200 for publication bias.

49  
50 201 Studies not complying with Hardy Weinberg equilibrium are shown in Supplementary Table S7.

51  
52 202

**DISCUSSION**

Investigations into RAAS genetic variants previously reported to have been associated with a range of CKD phenotypes were undertaken. A total of 3,286 studies were identified, 108 of which met the inclusion criteria. Subsequently, 25 quantitative analyses were completed for three RAAS genes where there were at least three independent population studies of the RAAS gene variants. Five significant results within three genes were obtained at the significance level  $p < 0.05$ , each revealing an association with CKD.

*ACE* is encoded by *DCP1* and is a key component of the RAAS. It catalyses the modification of angiotensin I to II, which is more biologically active(30). *ACE* is the most frequently studied gene of the RAAS(31). First sequenced in 1992(32), this 287 bp ALU repetitive element at intron 16(32) is located on chromosome 17 and is represented by four individual SNPs, rs4646994, rs1799752, rs4340 and rs13447447. Further understanding of its genetic architecture and disease associations may enable patient groups to benefit from targeted therapies with ACE inhibitors(33).

Since 1994, the association of *ACE* and DN has been rigorously investigated(33,34), with studies returning conflicting results. A meta-analysis undertaken in 2005 by Ng and colleagues(35) reported a statistically significant result wherein the *ACE* insertion was associated with protection from development of diabetic nephropathy in Asians and Caucasians. A second meta-analysis undertaken in 2012 also identified an association between the *ACE* I/D polymorphism and the development of diabetic nephropathy to ESRD, in that the presence of the deletion was associated with ESRD susceptibility(36). Despite having differences in the inclusion criteria to our meta-analysis, in that these investigations did not include any article published since 2011(35,36) and included individuals with microalbuminuria as cases(35), we returned similar results to the 2005 previous meta-analysis. Including individuals with microalbuminuria in the control population may cause challenges with phenotype definition as microalbuminuria may regress, remain stable, or progress to macroalbuminuria(37–39) over time. Individuals with microalbuminuria were therefore excluded from both case and control definitions to clarify the phenotypes in our review.

In our meta-analysis of *ACE*, which comprised 14,509 individuals with CKD and 18,157 individuals as controls from 94 population groups, we identified three significant associations of the *ACE* I/D polymorphism with CKD. Due to previously reported heterogeneity between different ethnic groups(35), we included this as a risk factor and performed each analysis per ethnicity (Table S2).

Firstly, comparisons between T2DN and T2DM in East Asian and South Asian populations returned significant results highlighting a protective effect of the *ACE* insertion in the development of diabetic nephropathy ( $P=0.009$  and  $P=0.01$  respectively). This result was mimicked in the comparison of individuals with ESRD, which was not caused by diabetic nephropathy, and healthy control individuals in an East Asian population ( $P=0.008$ ). The *ACE* I/D polymorphism remains a well characterised genetic locus associated with the progression of diabetic nephropathy.

*AGT* encodes the AGT glycoprotein, which is created in the liver and facilitates the creation of angiotensin I(11,40). It is located on chromosome 1. Several investigations have been conducted into the *AGT* gene variants and their association with risk of CKD(40–43). Among these, Zhou and colleagues undertook a meta-analysis investigation into *AGT* rs699 and its association with ESRD(40). The results of this study are agreement with ours in relation to the European ethnicity. Our meta-analysis encompassing 5,076 individuals with renal disease and 6,134 individuals without; the T allele provided a protective effect in ESRD development ( $P=0.002$ ) within this European population.



1  
2  
3 246 The *AGTR1* gene has been shown to be involved in the regulation of blood pressure, fluid and  
4 247 electrolyte balance(11). It may also have a role in inflammation and vasoconstriction(44). SNP  
5 248 rs5186, an AC nucleotide substitution at position 1166 in the 3' untranslated region of chromosome  
6 249 3, is reportedly able to be recognised by microRNA-155. When the A allele is present at this locus,  
7 250 microRNA-155 is able to undergo complementary base-pairing with *AGTR1* messenger RNA to  
8 251 suppress translation. However this is not possible when the alternative C allele is present, resulting  
9 252 in increased *AGTR1* protein levels(45). This interplay may affect blood pressure regulation and  
10 253 warrants further investigation(45).

11  
12 254 Previous studies have identified associations between rs5186 in *AGTR1* and diseases including  
13 255 coronary artery disease(46), systemic lupus erythematosus(47) and cancer(48). Several smaller  
14 256 studies had also been undertaken to assess links between this gene and renal disease(25,49–54). We  
15 257 conducted this study to provide a clearer understanding of the effect of this SNP on CKD.

16  
17 258 This meta-analysis of *AGTR1* variants included 3,197 individuals with renal disease and 3,720  
18 259 controls investigating rs5186. One significant result was identified; that the presence of an A allele at  
19 260 this locus provided a lower risk of developing T2DN in a South Asian population ( $P=0.001$ ).

20  
21 261 One meta-analysis published in 2014(55) assessed *AGTR1* in individuals with CKD, ESRD, IgA  
22 262 nephropathy or vesicoureteral reflux. This meta-analysis identified that rs5186 was not associated  
23 263 with any of these diseases, which corresponds to the results from our investigation.

24  
25 264 The three remaining RAAS genes included in this meta-analysis, *ACE2*, *AGTR2* and *REN*, have not  
26 265 been researched as extensively as the *ACE*, *AGT* and *AGTR1* for associations with renal disease. Very  
27 266 few articles were identified describing genetic association studies for these genes at the data  
28 267 extraction stage of the analysis, and those that were, were removed prior to the quantitative  
29 268 analysis stage, mainly due to the inclusion of paediatric individuals or non-human approaches, as  
30 269 outlined in Figures S1b, S1e and S1f. Further research into the *ACE2*, *AGTR2* and *REN* genes and their  
31 270 polymorphisms should be undertaken to elucidate their role in CKD and ESRD.

32  
33 271 Some studies in our search could not be included in quantitative analysis as they lacked information  
34 272 relating to genotype counts and had an unclear measure and definition of albuminuria for both cases  
35 273 and controls, which could constitute a limitation. Publication bias was reported in two of our  
36 274 quantitative analyses, but was not found in the analyses which provided our significant results. Lack  
37 275 of clarity in phenotype definitions, along with unclear descriptions of ethnicities, inherently  
38 276 challenge the use of meta-analyses of different populations as a valid instrument to uncover robust  
39 277 associations. CKD itself has a range of causes including glomerular damage and declining eGFR  
40 278 without albuminuria. Other confounding factors such as hypertension and cardiovascular disease,  
41 279 and a lack of prospective follow up of included individuals, which would ensure phenotypes are  
42 280 robust and stable, may also cause conflicting results.

43 281

44 282

## 45 283 **CONCLUSION**

46 284

47 285 This meta-analysis of the RAAS pathway genes and their association with renal disease has provided  
48 286 evidence for five significant associations with individually small effect sizes that may cumulatively  
49 287 contribute to dysfunction of the RAAS pathway leading to kidney disease. The insertion in *ACE I/D*  
50 288 polymorphism was a protection factor for the development of diabetic nephropathy in individuals  
51 289 with type 2 diabetes mellitus from both East and South Asian origin, and for ESRD in an East Asian  
52 290 population. In Europeans, the T allele of the *AGT* rs699 conferred a lower risk of ESRD development

291 in healthy population. The A allele in *AGTR1* rs5186 acted as a protection factor for renal disease  
292 development in South Asian population.

293 Further study into the specific ethnicities and investigations into a broader range of RAAS linked  
294 genes, or a deeper analysis of them including investigations of more variants, may pinpoint the  
295 molecular basis underlying the role of pathway in kidney disease. Network analysis and functional  
296 studies enlightening the mechanisms involved ultimately will be required to complete the picture of  
297 RAAS variation in renal traits.

298

## 299 **STATEMENTS AND CONTRIBUTIONS**

300

### 301 **Acknowledgements and Funding**

302 LJS is the recipient of a Northern Ireland Kidney Research Fund Fellowship.

303 MCG is funded by a Science Foundation Ireland-Department for the Economy (SFI-DfE) Investigator  
304 Program Partnership Award (15/IA/3152).

305 RCC is the recipient of a Department for the Economy (DfE) PhD studentship.

306 None of the funding bodies had a role in the study design or analysis.

307

### 308 **Statement of competing interests**

309 The authors declare that they have no competing interests.

310

### 311 **Availability of data and material**

312 The datasets generated and/or analysed during the current study are available from the  
313 corresponding author on reasonable request.

314

### 315 **Author contributions**

316 LJS formulated the research plan, conducted the analysis, interpreted the data, drafted the  
317 manuscript and revised the manuscript.

318 MCG conducted the analysis, interpreted the data and revised the manuscript.

319 RCC conducted the analysis, interpreted the data and revised the manuscript.

320 APM acquired the funding, managed the project, interpreted the data and revised the manuscript.

321 AJM acquired the funding, formulated the research plan, interpreted the data, managed the project  
322 and revised the manuscript.

323 All authors read and approved the final manuscript.

324

## 325 REFERENCES

- 326 1. Levey AS, Coresh J. Chronic kidney disease. *Lancet*. 2012 Jan 14;379(9811):165–80.
- 327 2. Glasscock RJ, Warnock DG, Delanaye P. The global burden of chronic kidney disease:  
328 Estimates, variability and pitfalls. *Nat Rev Nephrol*. 2017;13(2):104–14.
- 329 3. Mills KT, Xu Y, Zhang W, Bundy JD, Chen C-S, Kelly TN, et al. A systematic analysis of world-  
330 wide population-based data on the global burden of chronic kidney disease in 2010 HHS  
331 Public Access. *Kidney Int*. 2015;88(5):950–7.
- 332 4. Smyth LJ, Duffy S, Maxwell AP, McKnight AJ. Genetic and epigenetic factors influencing  
333 chronic kidney disease. *Am J Physiol Renal Physiol*. 2014;307(7):F757-76.
- 334 5. Brancati FL, Whelton PK, Randall BL, Neaton JD, Stamler J, Klag MJ. Risk of end-stage renal  
335 disease in diabetes mellitus: a prospective cohort study of men screened for MRFIT. Multiple  
336 Risk Factor Intervention Trial. *JAMA*. 1997;278(23):2069–74.
- 337 6. Klag MJ, Whelton PK, Randall BL, Neaton JD, Brancati FL, Ford CE, et al. Blood pressure and  
338 end-stage renal disease in men. *N Engl J Med*. 1996;334(1):13–8.
- 339 7. Cowie CC, Port FK, Wolfe RA, Savage PJ, Moll PP, Hawthorne VM. Disparities in Incidence of  
340 Diabetic End-Stage Renal Disease According to Race and Type of Diabetes. *N Engl J Med*.  
341 1989;321(16):1074–9.
- 342 8. Mathur R, Dreyer G, Yaqoob MM, Hull SA. Ethnic differences in the progression of chronic  
343 kidney disease and risk of death in a UK diabetic population: an observational cohort study.  
344 *BMJ Open*. 2018;8(3):e020145.
- 345 9. Velez JCQ. The importance of the intrarenal renin-angiotensin system. *Nat Clin Pract Nephrol*.  
346 2009;5(2):89–100.
- 347 10. Nishiyama A, Kim-Mitsuyama S. New Approaches to Blockade of the Renin–Angiotensin–  
348 Aldosterone System: Overview of Regulation of the Renin–Angiotensin–Aldosterone System. *J*  
349 *Pharmacol Sci*. 2010;113(4):289–91.
- 350 11. Remuzzi G, Perico N, Macia M, Ruggenenti P. The role of renin-angiotensin-aldosterone  
351 system in the progression of chronic kidney disease. *Kidney Int Suppl*. 2005;68(99):S57–65.
- 352 12. Nishiyama A, Kobori H. Independent regulation of renin–angiotensin–aldosterone system in  
353 the kidney. *Clin Exp Nephrol*. 2018;doi: 10.1007/s10157-018-1567-1.
- 354 13. Carey RM. The intrarenal renin-angiotensin system in hypertension. *Adv Chronic Kidney Dis*.  
355 2015;22(3):204–10.
- 356 14. Zhang F, Liu H, Liu D, Liu Y, Li H, Tan X, et al. Effects of RAAS Inhibitors in Patients with Kidney  
357 Disease. *Curr Hypertens Rep*. 2017;19(9):72.
- 358 15. Coll E, Campos B, González-Núñez D, Botey A, Poch E. Association between the A1166C  
359 polymorphism of the angiotensin II receptor type 1 and progression of chronic renal  
360 insufficiency. *J Nephrol*. 2003;16(3):357–64.
- 361 16. Bermejo S, García CO, Rodríguez E, Barrios C, Otero S, Mojal S, et al. The renin-angiotensin-  
362 aldosterone system blockade in patients with advanced diabetic kidney disease. *Nefrologia*.  
363 2017;32(2):197–206.
- 364 17. Yamout H, Lazich I, Bakris GL. Blood pressure, hypertension, RAAS blockade, and drug therapy  
365 in diabetic kidney disease. *Adv Chronic Kidney Dis*. 2014;21(3):281–6.



- 1  
2  
3 366 18. Rahimi Z. The Role of Renin Angiotensin Aldosterone System Genes in Diabetic Nephropathy.  
4 367 Can J Diabetes. 2016;40(2):178–83.
- 5 368 19. Mezzano S a, Ruiz-Ortega M, Egido J. Angiotensin II and renal fibrosis. Hypertension.  
6 369 2001;38(3 Pt 2):635–8.
- 8 370 20. Kelly TN, Raj D, Rahman M, Kretzler M, Kalleem RR, Ricardo AC, et al. The role of renin-  
9 371 angiotensin-aldosterone system genes in the progression of chronic kidney disease: Findings  
10 372 from the Chronic Renal Insufficiency Cohort (CRIC) study. Nephrol Dial Transplant.  
11 373 2015;30(10):1711–8.
- 13 374 21. Ramanathan G, Elumalai R, Periyasamy S, Lakkakula BVKS. Renin gene rs1464816  
14 375 polymorphism contributes to chronic kidney disease progression in ADPKD. J Biomed Sci.  
15 376 2016;23(1):1–7.
- 17 377 22. Kawada N, Moriyama T, Yokoyama K, Yamauchi A, Ando A, Mikami H, et al. Renin-angiotensin  
18 378 system component gene polymorphisms in Japanese maintenance haemodialysis patients.  
19 379 Nephrology. 1997;3(4):521–6.
- 21 380 23. Parsa A, Lovett DH, Peden EA, Zhu L, Seldin MF, Criswell LA. Renin-angiotensin system gene  
22 381 polymorphisms predict the progression to renal insufficiency among Asians with lupus  
23 382 nephritis. Genes Immun. 2005;6(3):217–24.
- 24 383 24. Özkaya O, Söylemezoğlu O, Gönen S, Misirlioğlu M, Tuncer S, Kalman S, et al. Renin-  
25 384 angiotensin system gene polymorphisms: Association with susceptibility to Henoch-Schonlein  
26 385 purpura and renal involvement. Clin Rheumatol. 2006;25(6):861–5.
- 28 386 25. Lau YK, Woo KT, Choong HL, Zhao Y, Tan HB, Chong SMCF, et al. Renin-angiotensin system  
29 387 gene polymorphisms: Its impact on IgAN and its progression to end-stage renal failure among  
30 388 Chinese in Singapore. Nephron - Physiol. 2004;97(1):1–9.
- 32 389 26. Mtiraoui N, Ezzidi I, Turki A, Chaieb M, Mahjoub T, Almawi WY. Renin-angiotensin-  
33 390 aldosterone system genotypes and haplotypes affect the susceptibility to nephropathy in  
34 391 type 2 diabetes patients. J Renin Angiotensin Aldosterone Syst. 2011;12(4):572–80.
- 36 392 27. Stroup DF, Berlin JA, Morton SC, Olkin I, Williamson GD, Rennie D, et al. Meta-analysis of  
37 393 observational studies in epidemiology: a proposal for reporting. Meta-analysis Of  
38 394 Observational Studies in Epidemiology (MOOSE) group. JAMA. 2000;283(15):2008–12.
- 39 395 28. International Genome Population [Internet]. Available from:  
40 396 www.internationalgenome.org/category/population
- 42 397 29. Higgins JPT, Thompson SG, Deeks JJ, Altman DG. Measuring inconsistency in meta-analyses.  
43 398 BMJ Br Med J. 2003;327(7414):557–60.
- 45 399 30. Rieder MJ, Taylor SL, Clark AG, Nickerson DA. Sequence variation in the human angiotensin  
46 400 converting enzyme. Nat Genet. 1999;22(1):59–62.
- 48 401 31. Moon JY. Recent update of renin-angiotensin-aldosterone system in the pathogenesis of  
49 402 hypertension. Electrolyte Blood Press. 2013;11(2):41–5.
- 50 403 32. Rigat B, Hubert C, Corvol P, Soubrier R. PCR detection of the insertion/deletion polymorphism  
51 404 of the human angiotensin converting enzyme gene (DCP1) (dipeptidyl carboxypeptidase 1).  
52 405 Nucleic Acids Res. 1992;20(6):1433.
- 54 406 33. Ha S-K. ACE Insertion/Deletion Polymorphism and Diabetic Nephropathy: Clinical Implications  
55 407 of Genetic Information. J Diabetes Res. 2014;2014:1–8.

- 1  
2  
3 408 34. Marre M, Bernadet P, Gallois Y, Savagner F, Guyene TT, Hallab M, et al. Relationships  
4 409 between angiotensin I converting enzyme gene polymorphism, plasma levels, and diabetic  
5 410 retinal and renal complications. *Diabetes*. 1994;43(3):384–8.
- 6  
7 411 35. Ng DPK, Tai BC, Koh D, Tan KW, Chia KS. Angiotensin-I converting enzyme insertion/deletion  
8 412 polymorphism and its association with diabetic nephropathy: A meta-analysis of studies  
9 413 reported between 1994 and 2004 and comprising 14,727 subjects. *Diabetologia*.  
10 414 2005;48(5):1008–16.
- 11 415 36. Yu Z-Y, Chen L-S, Zhang L-C, Zhou T-B. Meta-analysis of the relationship between ACE I/D  
12 416 gene polymorphism and end-stage renal disease in patients with diabetic nephropathy.  
13 417 *Nephrology (Carlton)*. 2012;17(5):480–7.
- 14  
15 418 37. Caramori ML, Fioretto P, Mauer M. The need for early predictors of diabetic nephropathy  
16 419 risk: Is albumin excretion rate sufficient? *Diabetes*. 2000;49(9):1399–408.
- 17  
18 420 38. Perkins BA, Ficociello LH, Silva KH, Finkelstein DM, Warram JH, Krolewski AS. Regression of  
19 421 microalbuminuria in type 1 diabetes. *N Engl J Med*. 2003;348(23):2285–93.
- 20  
21 422 39. Zelmanovitz T, Gerchman F, Balthazar AP, Thomazelli FC, Matos JD, Canani LH. Diabetic  
22 423 nephropathy. *Diabetol Metab Syndr*. 2009;1(1):10.
- 23  
24 424 40. Zhou T-B, Yin S-S, Qin Y-H. Association of angiotensinogen M235T gene polymorphism with  
25 425 end-stage renal disease risk: a meta-analysis. *Mol Biol Rep*. 2013;40(2):765–72.
- 26  
27 426 41. Turgut S, AkIn F, Akcllar R, Ayada C, Turgut G. Angiotensin converting enzyme I/D,  
28 427 angiotensinogen M235T and AT1-R A/C1166 gene polymorphisms in patients with  
29 428 acromegaly. *Mol Biol Rep*. 2011;38(1):569–76.
- 30  
31 429 42. Wang YJ, Pan Y. Angiotensinogen gene M235T polymorphism and risk of coronary artery  
32 430 disease: a meta-analysis. *Mol Med Rep*. 2012;6(4):884–8.
- 33  
34 431 43. Lin R, Lei Y, Yuan Z, Ju H, Li D. Angiotensinogen Gene M235T and T174M Polymorphisms and  
35 432 Susceptibility of Pre-Eclampsia: A Meta-Analysis. *Ann Hum Genet*. 2012;76(5):377–86.
- 36  
37 433 44. Chow BSM, Allen TJ. Angiotensin II type 2 receptor (AT2R) in renal and cardiovascular disease.  
38 434 *Clin Sci*. 2016;130(15):1307–26.
- 39  
40 435 45. Ceolotto G, Papparella I, Bortoluzzi A, Strapazon G, Ragazzo F, Bratti P, et al. Interplay  
41 436 between miR-155, AT1R A1166C polymorphism, and AT1R expression in young untreated  
42 437 hypertensives. *Am J Hypertens*. 2011;24(2):241–6.
- 43  
44 438 46. Duan LJ, Wang XD. Analysis of correlations between coronary heart disease and haplotypes of  
45 439 the angiotensin II receptor type 1 (AGTR1) gene. *Genet Mol Res*. 2016;15(1):doi:  
46 440 10.4238/gmr.15017457.
- 47  
48 441 47. Baniamerian H, Bahrehmand F, Vaisi-Raygani A, Rahimi Z, Pourmotabbed T. Angiotensin type  
49 442 1 receptor A1166C polymorphism and systemic lupus erythematosus: correlation with  
50 443 cellular immunity and oxidative stress markers. *Lupus*. 2017;26(14):1534–9.
- 51  
52 444 48. Pringle KG, Delforce SJ, Wang Y, Ashton KA, Proietto A, Otton G, et al. Renin–angiotensin  
53 445 system gene polymorphisms and endometrial cancer. *Endocr Connect*. 2016;5(3):128–35.
- 54  
55 446 49. Gao J, Yu Q-L, Fu R-G, Wei L-T, Wang M, Dong F-M, et al. Lack of Association Between  
56 447 Polymorphisms in AGT and ATR1 and IgA Nephropathy in a Chinese Population. *Genet Test  
57 448 Mol Biomarkers*. 2015;19(12):710–3.
- 58  
59 449 50. Huang HD, Lin FJ, Li XJ, Wang LR, Jiang GR. Genetic polymorphisms of the renin-angiotensin-

- 1  
2  
3 450 aldosterone system in Chinese patients with end-stage renal disease secondary to IgA  
4 451 nephropathy. *Chin Med J (Engl)*. 2010;123(22):3238–42.
- 5 452 51. Kim SM, Chin HJ, Oh YK, Kim YS, Kim S, Lim CS. Blood pressure-related genes and the  
6 453 progression of IgA nephropathy. *Nephron Clin Pract*. 2009;113(4):c301-8.
- 8 454 52. Savage DA, Feeney SA, Fogarty DG, Maxwell AP. Risk of developing diabetic nephropathy is  
9 455 not associated with synergism between the angiotensin II (type 1) receptor C1166 allele and  
10 456 poor glycaemic control. *Nephrol Dial Transpl*. 1999;14(4):891–4.
- 12 457 53. Van Ittersum FJ, De Man AME, Thijssen S, De Knijff P, Slagboom E, Smulders Y, et al. Genetic  
13 458 polymorphisms of the renin-angiotensin system and complications of insulin-dependent  
14 459 diabetes mellitus. *Nephrol Dial Transplant*. 2000;15(7):1000–7.
- 16 460 54. Prasad P, Tiwari AK, Kumar KP, Ammini A, Gupta A, Gupta R, et al. Chronic renal insufficiency  
17 461 among Asian Indians with type 2 diabetes: I. Role of RAAS gene polymorphisms. *BMC Med  
18 462 Genet*. 2006;7(1):42.
- 19 463 55. Braliou GG, Grigoriadou AMG, Kontou PI, Bagos PG. The role of genetic polymorphisms of the  
20 464 Renin-Angiotensin System in renal diseases: A meta-analysis. *Comput Struct Biotechnol J*.  
21 465 2014;10(7):1–7.  
22 466  
23  
24  
25  
26  
27  
28  
29  
30  
31  
32  
33  
34  
35  
36  
37  
38  
39  
40  
41  
42  
43  
44  
45  
46  
47  
48  
49  
50  
51  
52  
53  
54  
55  
56  
57  
58  
59  
60

**Figure 1: Workflow pattern**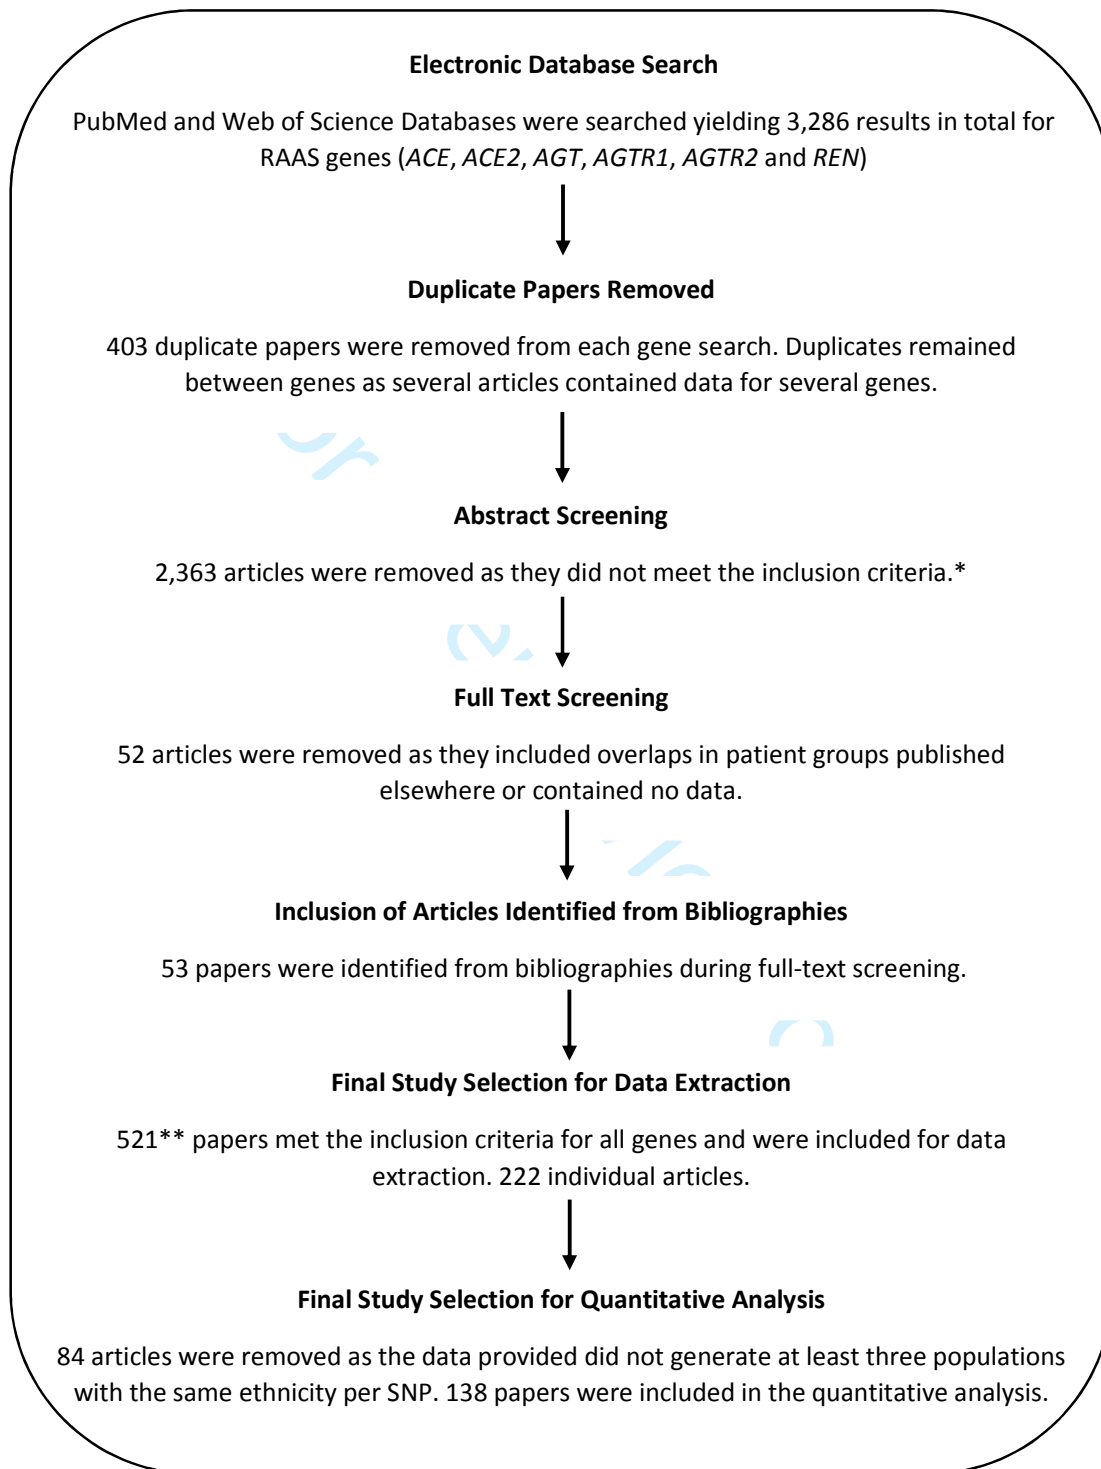

\*Inclusion criteria: Any paper was removed from the analysis if it was not written in English or Spanish, was a non-human study, was a paediatric study, was not a case-control study, did not have a renal disease phenotype, did not include data for the gene of interest, was a gene expression based study or had a pharmaceutical drug focus.

\*\*Final selection: Several papers provided data for > 1 gene, so this figure includes duplicates.

Figure 2a: ACE I/D investigation, individuals with type 2 diabetic nephropathy compared to individuals with type 2 diabetes mellitus in an East Asian Population (insertion compared to deletion)

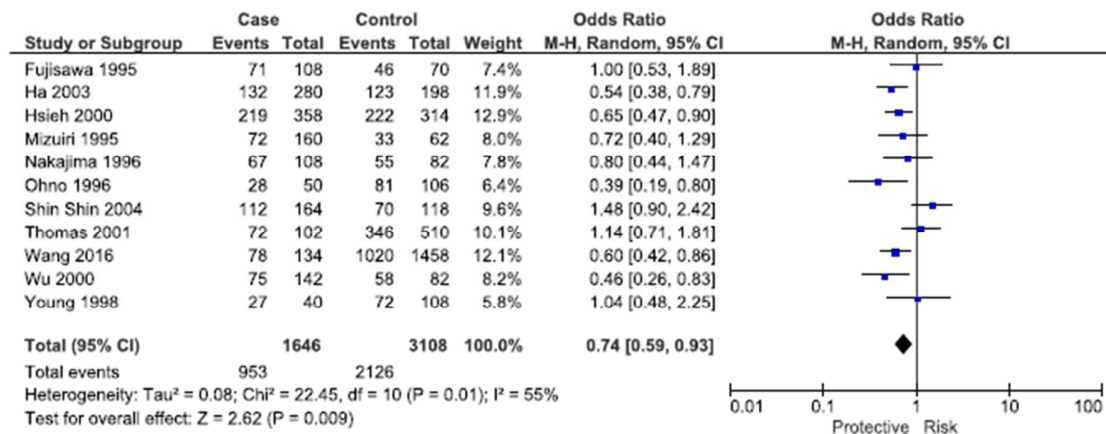

Figure 2b: ACE I/D investigation, individuals with type 2 diabetic nephropathy compared to individuals with type 2 diabetes mellitus in a South Asian Population (insertion compared to deletion)

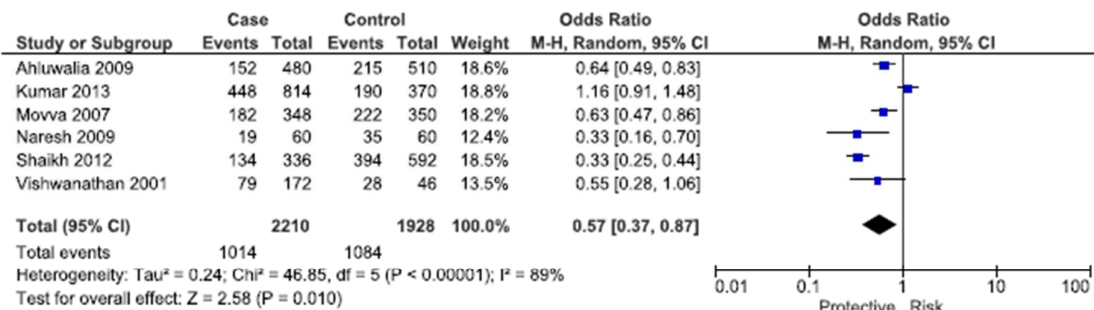

Figure 2c: ACE I/D investigation, individuals with end-stage renal disease compared to healthy controls in an East Asian Population (insertion compared to deletion)

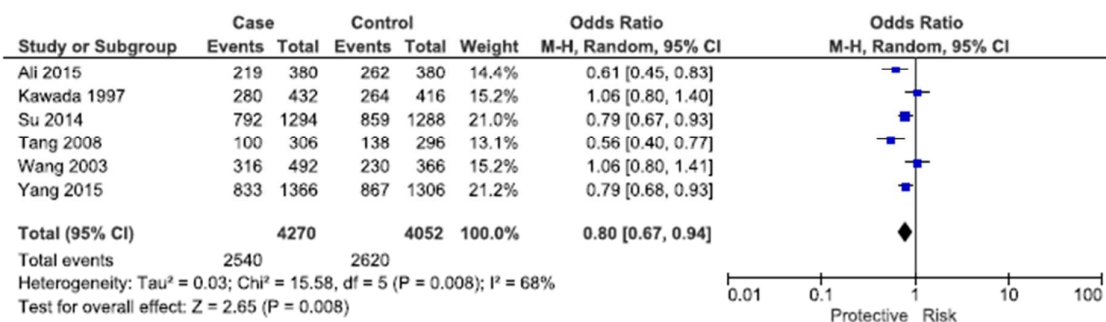

Figure 2d: *AGT* rs699 investigation, individuals with end-stage renal disease compared to healthy controls in a European Population (T allele compared to C)

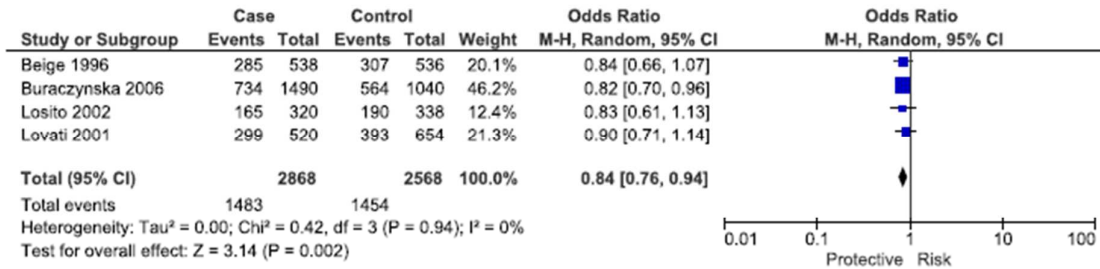

Figure 2e: *AGTR1* rs5186 investigation, individuals with type 2 diabetic nephropathy compared to individuals with type 2 diabetes mellitus in a South Asian Population (A allele compared to C allele)

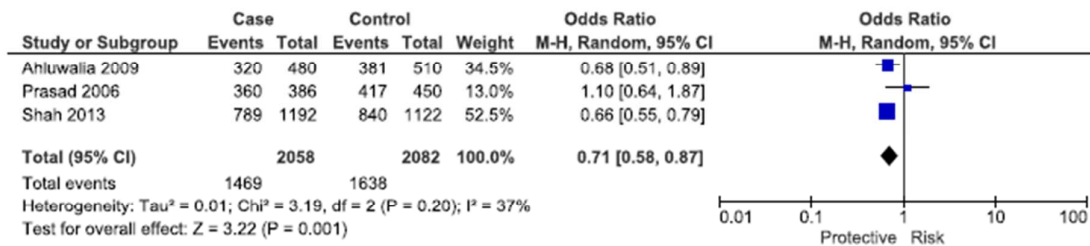

## Supplementary Figure S1a: ACE Study Flow Diagram

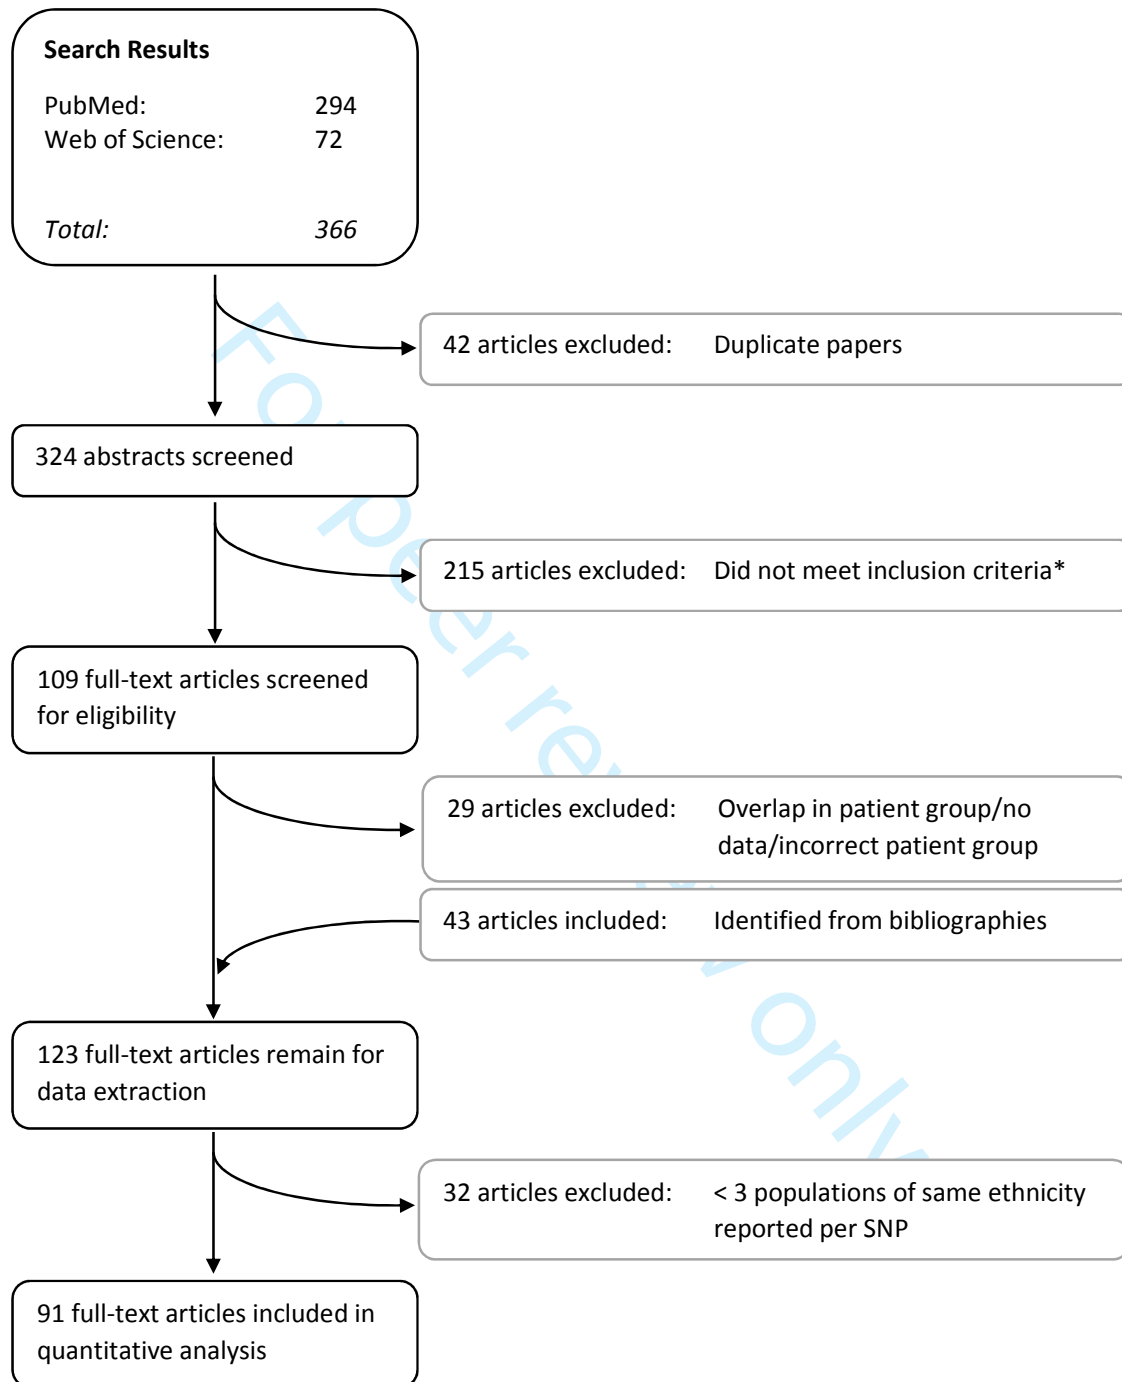

\*Inclusion criteria: Any paper was removed from the analysis if it was not written in English or Spanish (n=20), was a non-human study (n=5), was a paediatric study (n=48), was not a case-control study (n=34), did not have a renal disease phenotype (n=86), did not include data for ACE (n=13) or had a pharmaceutical drug focus (n=9)

## Supplementary Figure S1b: ACE2 Study Flow Diagram

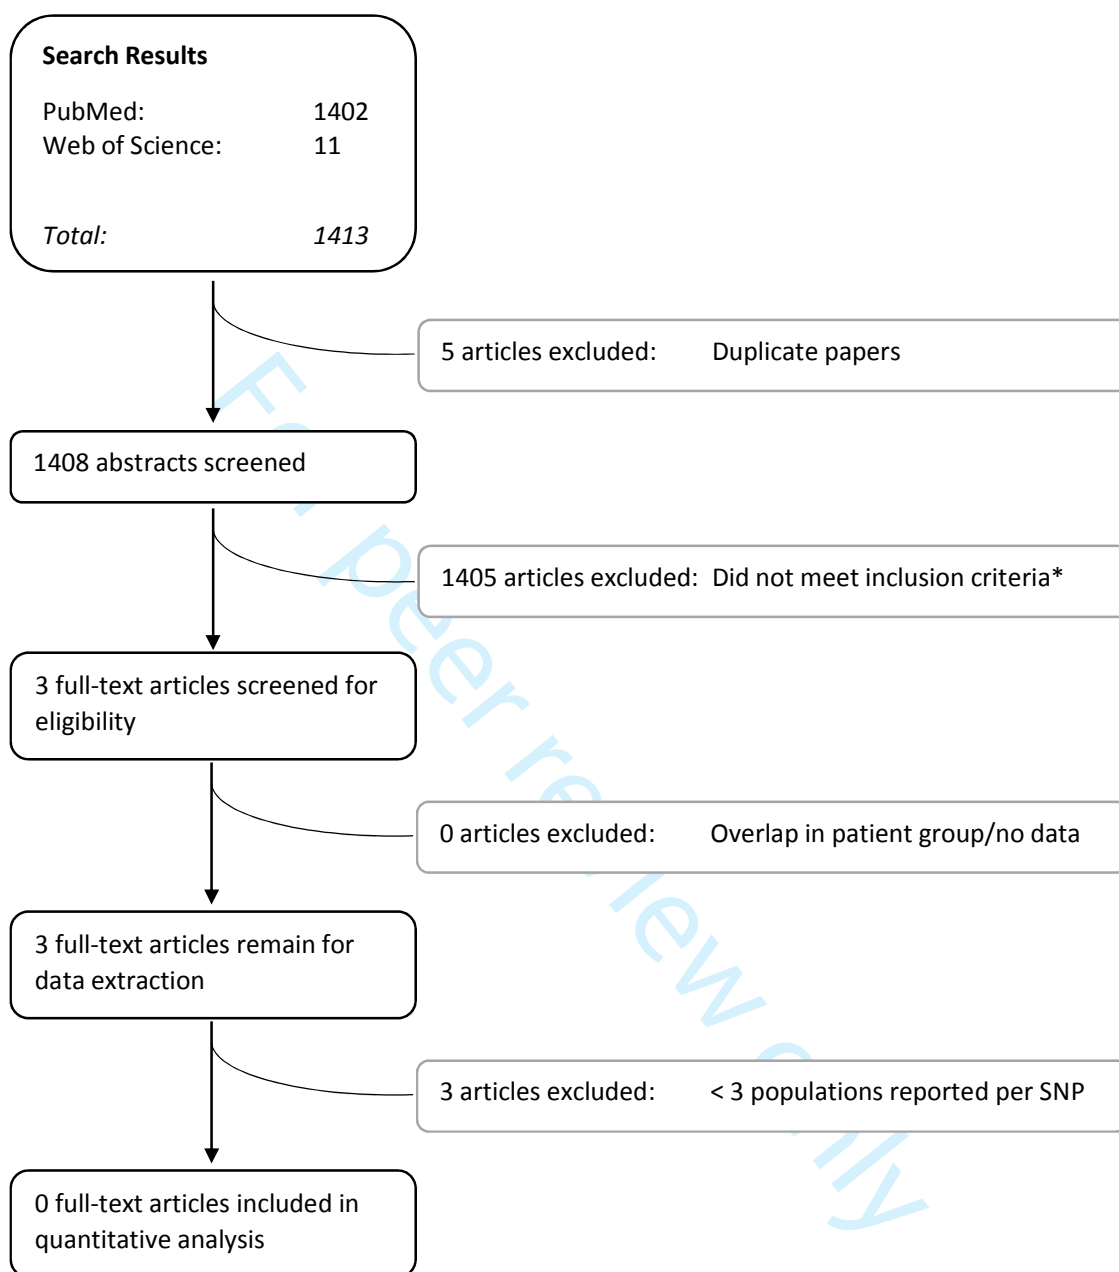

\*Inclusion criteria: Any paper was removed from the analysis if it was not written in English or Spanish (n=52), was a non-human study (n=96), was a paediatric study (n=135), was not a case-control study (n=33), did not have a renal disease phenotype (n=630), did not include data for ACE2 (n=415) or had a pharmaceutical drug focus (n=44)



## Supplementary Figure S1c: AGT Study Flow Diagram

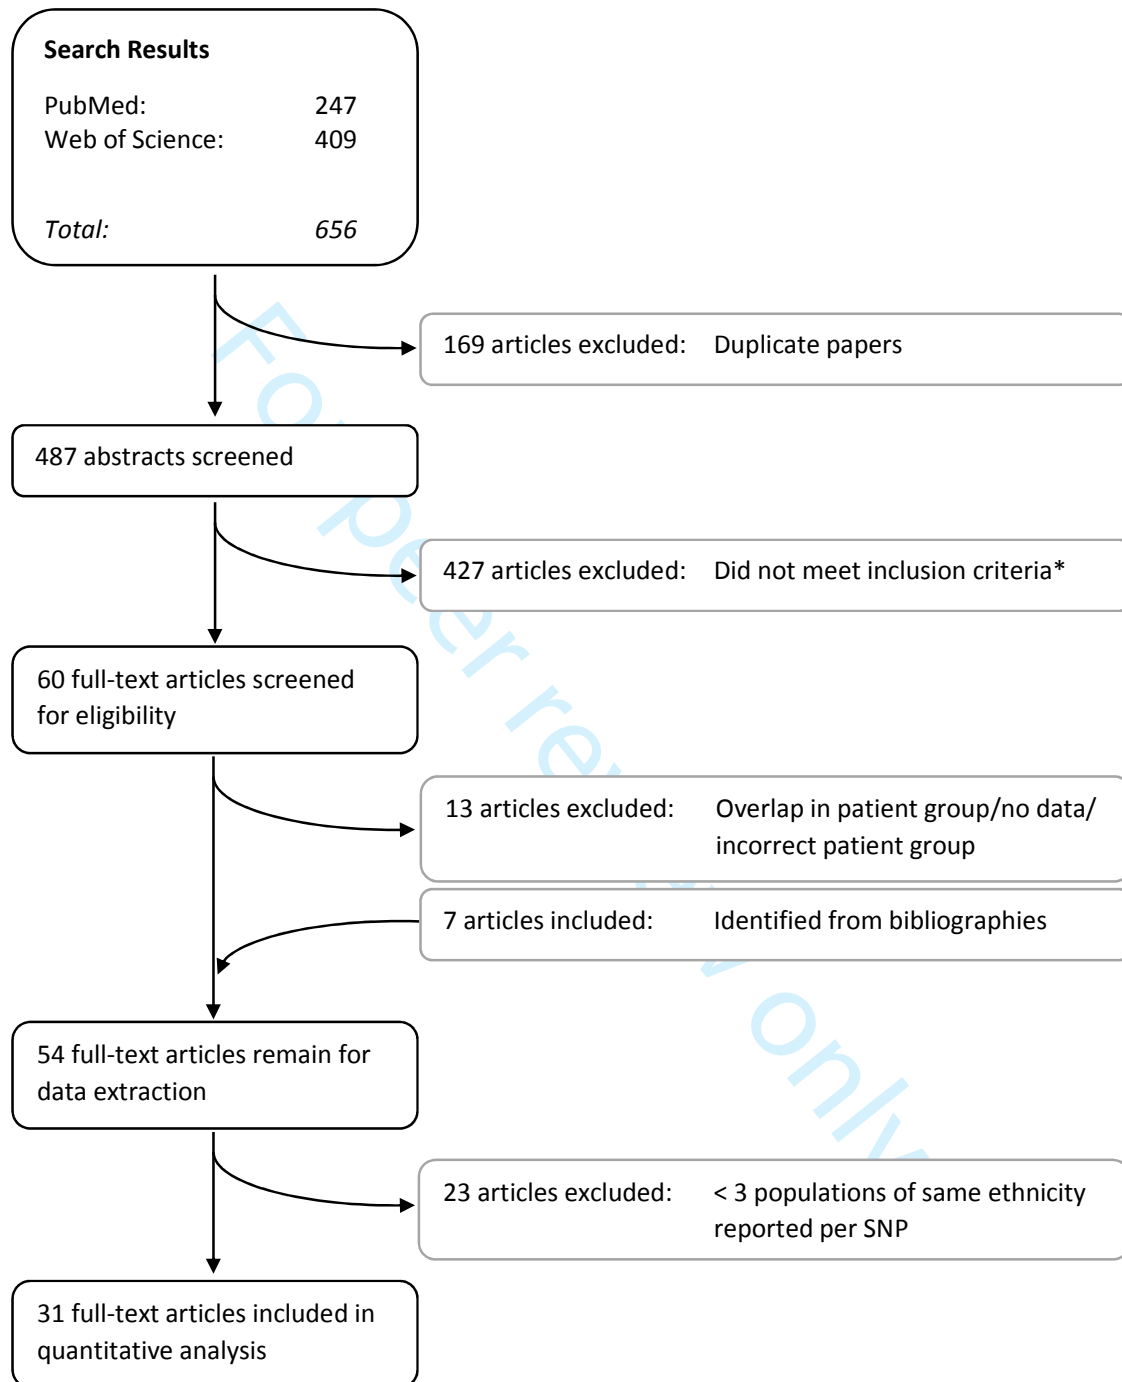

\*Inclusion criteria: Any paper was removed from the analysis if it was not written in English or Spanish (n=16), was a non-human study (n=112), was a paediatric study (n=37), was not a case-control study (n=49), did not have a renal disease phenotype (n=127), did not include data for AGT (n=69), was a gene expression based study (n=1) or had a pharmaceutical drug focus (n=16)

Supplementary Figure S1d: *AGTR1* Study Flow Diagram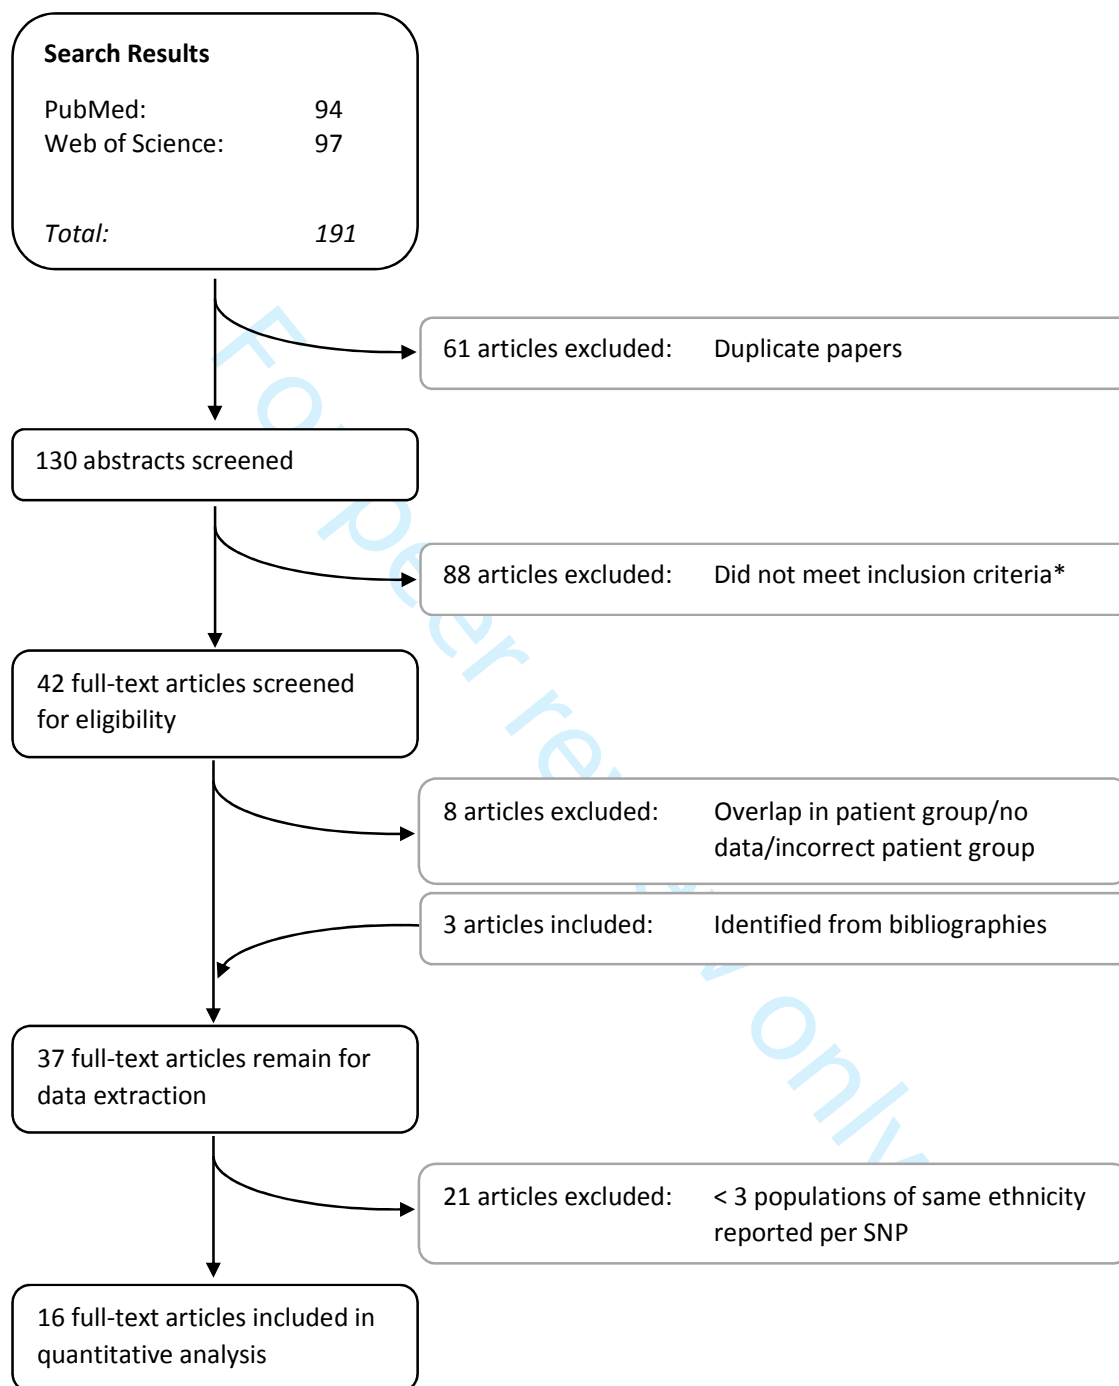

\*Inclusion criteria: Any paper was removed from the analysis if it was not written in English or Spanish (n=8), was a non-human study (n=10), was a paediatric study (n=19), was not a case-control study (n=14), did not have a renal disease phenotype (n=25), did not include data for *AGTR1* (n=2), was a gene expression based study (n=1) or had a pharmaceutical drug focus (n=9)

Supplementary Figure S1e: *AGTR2* Study Flow Diagram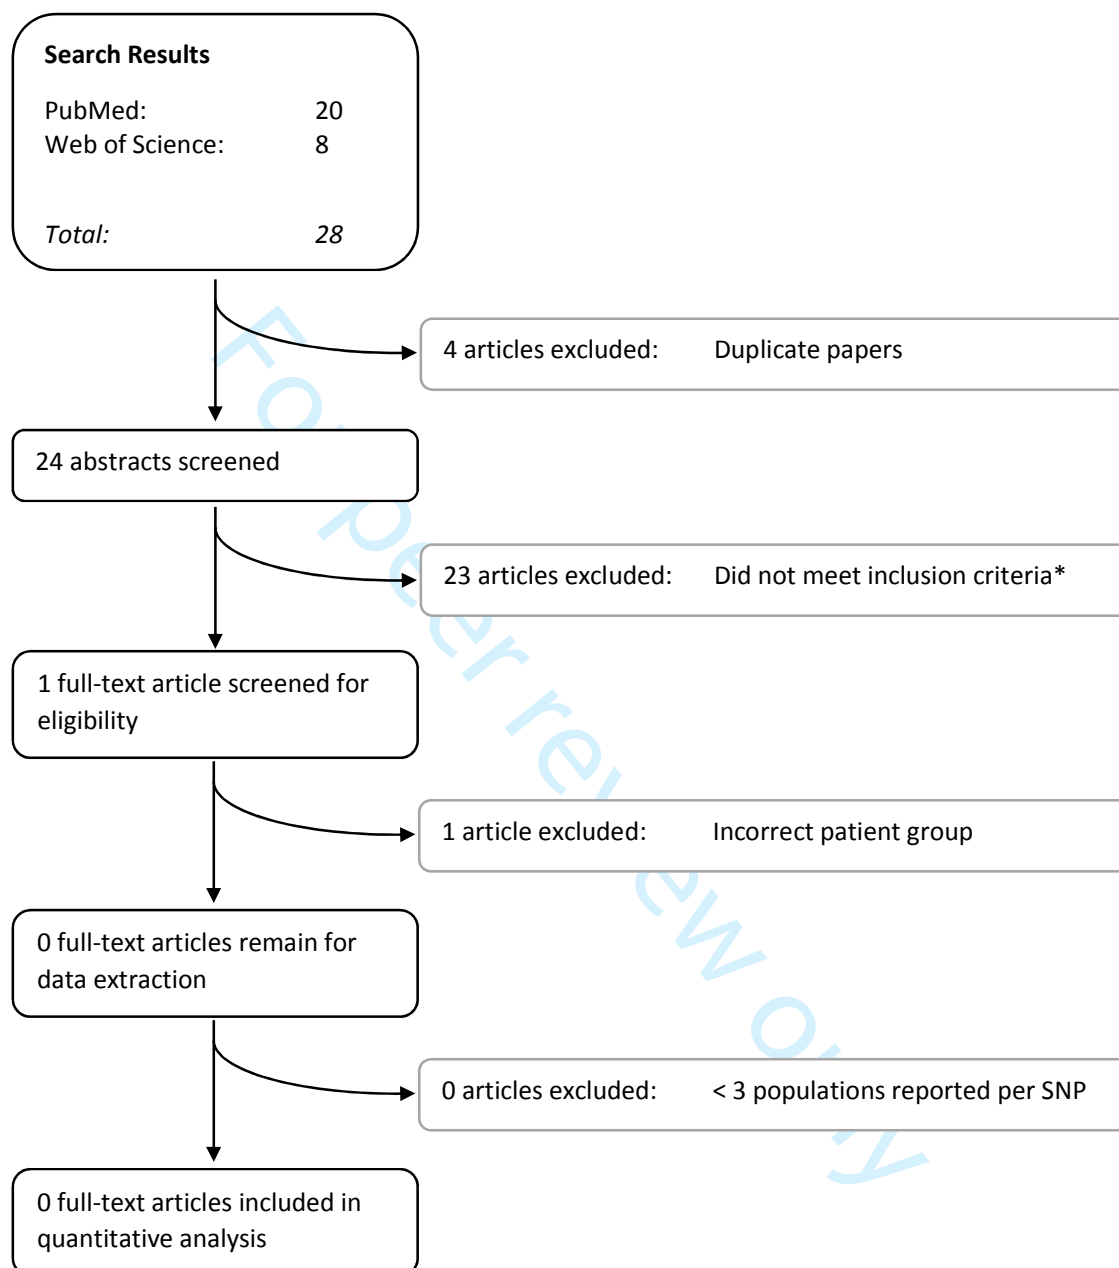

\*Inclusion criteria: Any paper was removed from the analysis if it was not written in English or Spanish (n=1), was a non-human study (n=1), was a paediatric study (n=6), was not a case-control study (n=4), did not have a renal disease phenotype (n=5) or did not include data for *AGTR2* (n=6)

Supplementary Figure S1f: *REN* Study Flow Diagram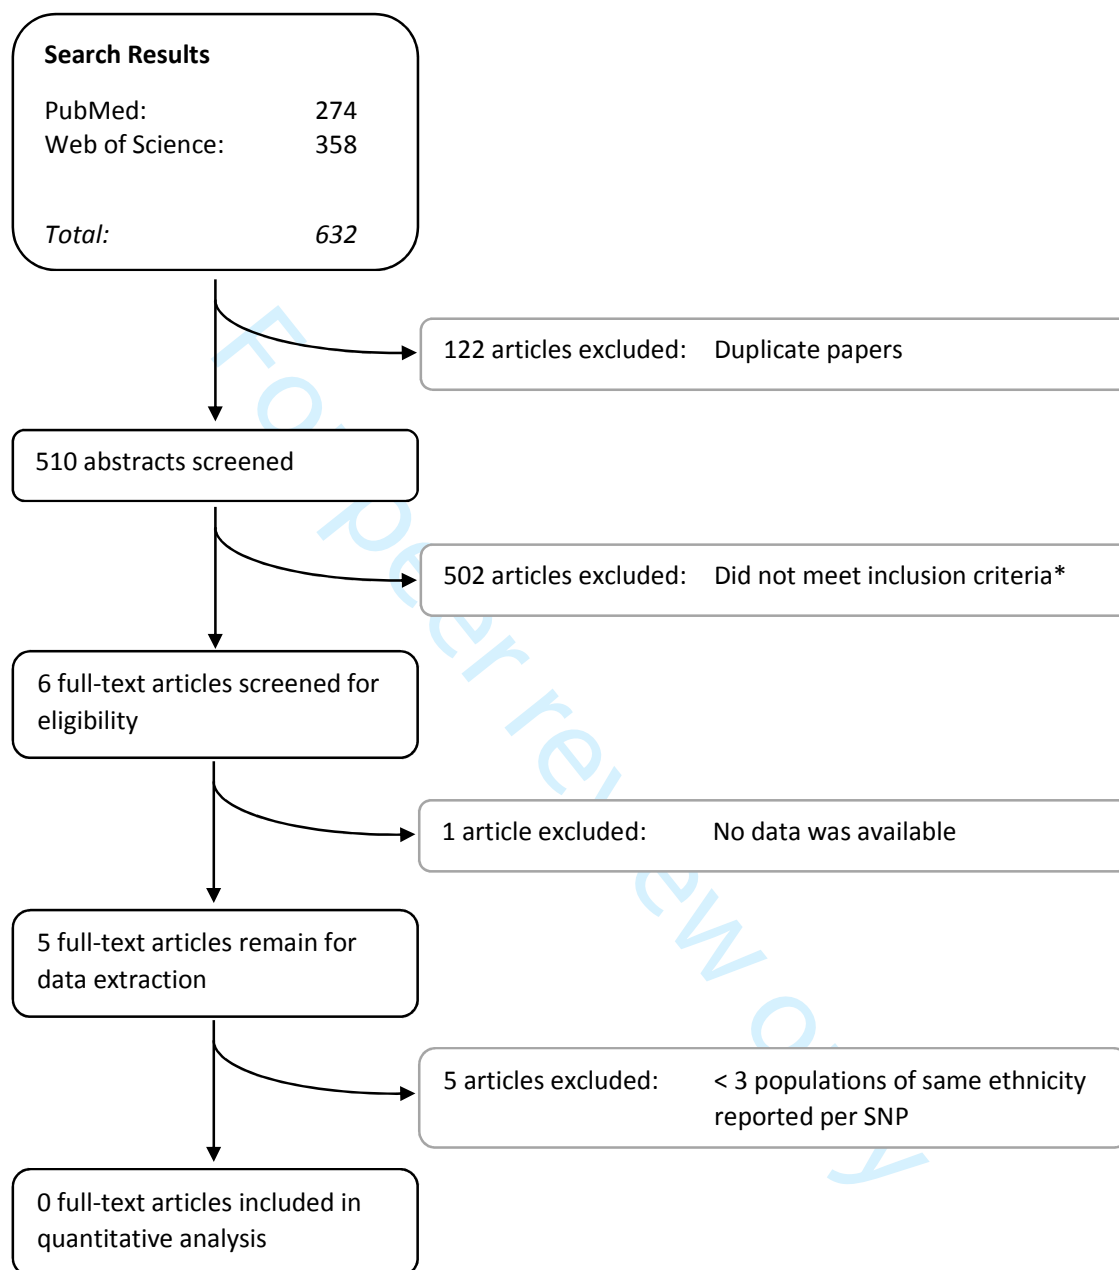

\*Inclusion criteria: Any paper was removed from the analysis if it was not written in English or Spanish (n=17), was a non-human study (n=69), was a paediatric study (n=45), was not a case-control study (n=64), did not have a renal disease phenotype (n=166), did not include data for *REN* (n=124), was a gene expression based study (n=3) or had a pharmaceutical drug focus (n=14)

**ACE**

**Supplementary Figure S2a: ACE I/D investigation, individuals with type 1 diabetic nephropathy compared to individuals with type 1 diabetes mellitus in a European Population (insertion compared to deletion)**

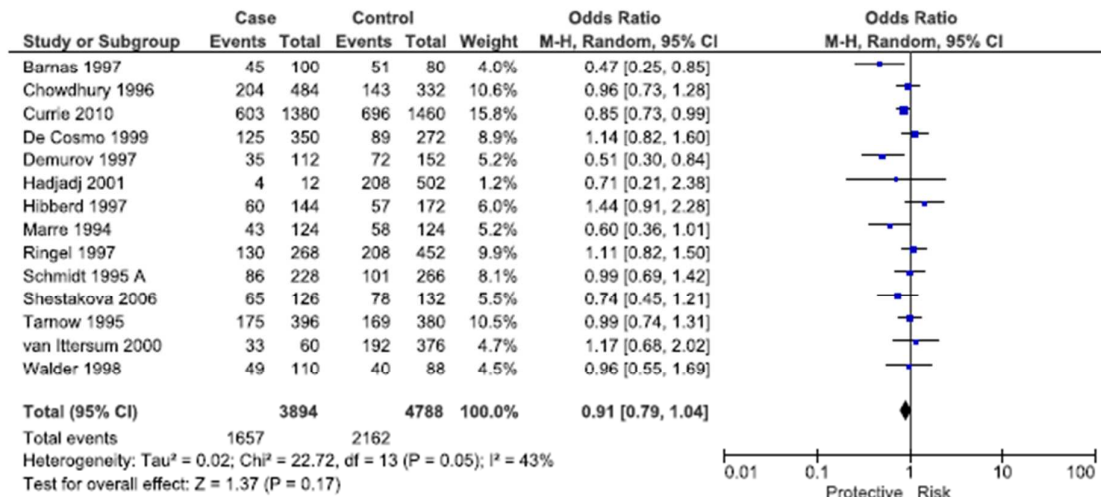

**Supplementary Figure S2b: ACE I/D investigation, individuals with type 2 diabetic nephropathy compared to individuals with type 2 diabetes mellitus in a European Population (insertion compared to deletion)**

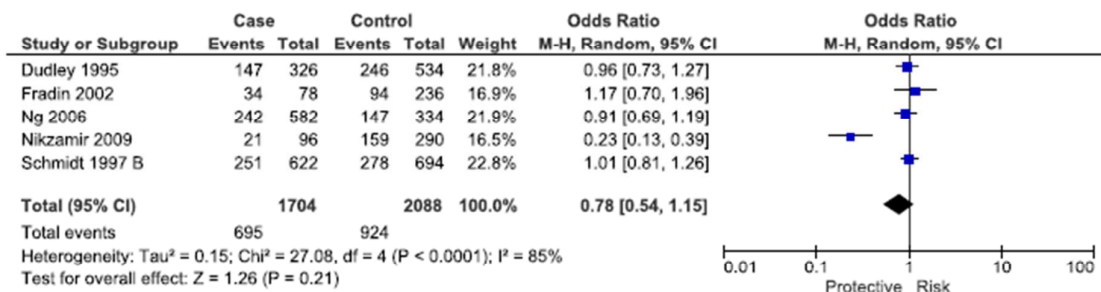

**Supplementary Figure S2c: ACE I/D investigation, individuals with type 2 diabetic nephropathy compared to individuals with type 2 diabetes mellitus in a Middle Eastern Population (insertion compared to deletion)**

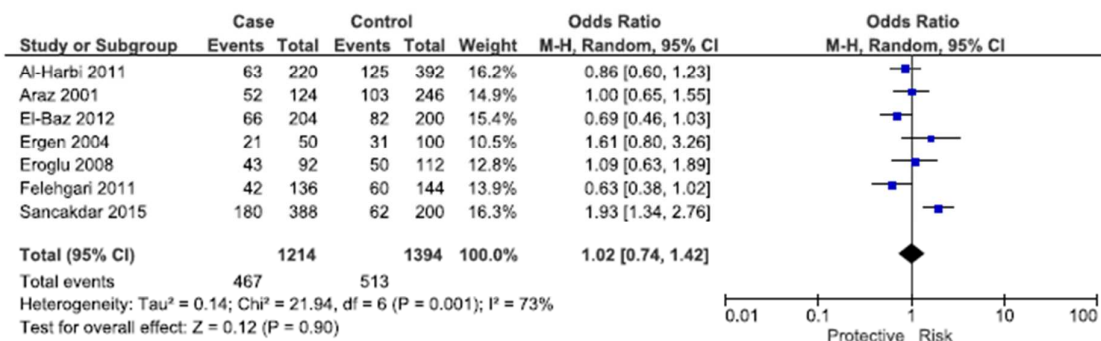

**Supplementary Figure S2d: ACE I/D investigation, individuals with IgA nephropathy compared to healthy controls in an East Asian Population (insertion compared to deletion)**

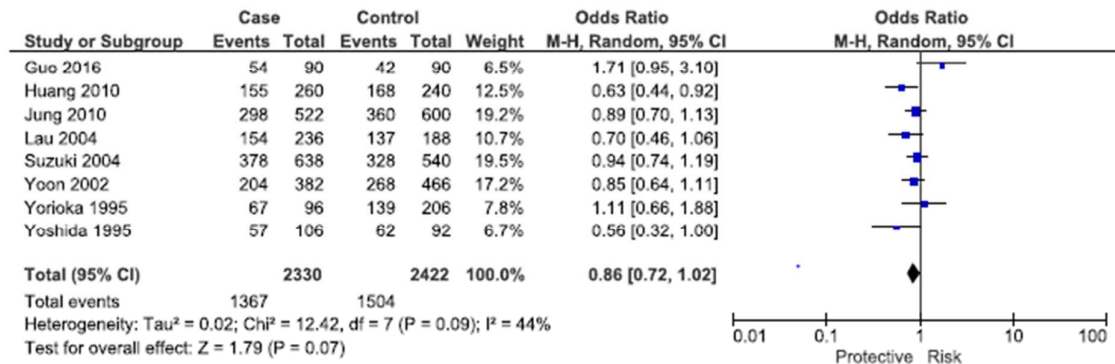

**Supplementary Figure S2e: ACE I/D investigation, individuals with IgA nephropathy compared to healthy controls in a European Population (insertion compared to deletion)**

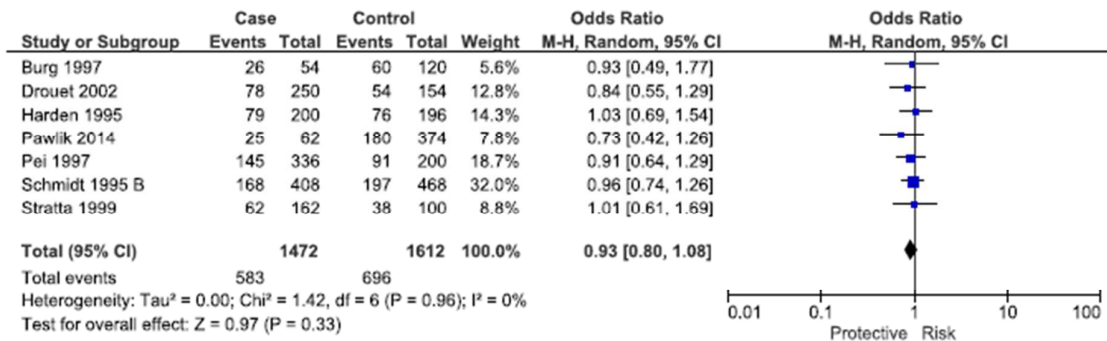

**Supplementary Figure S2f: ACE I/D investigation, individuals with chronic kidney disease compared to healthy controls in a South Asian Population (insertion compared to deletion)**

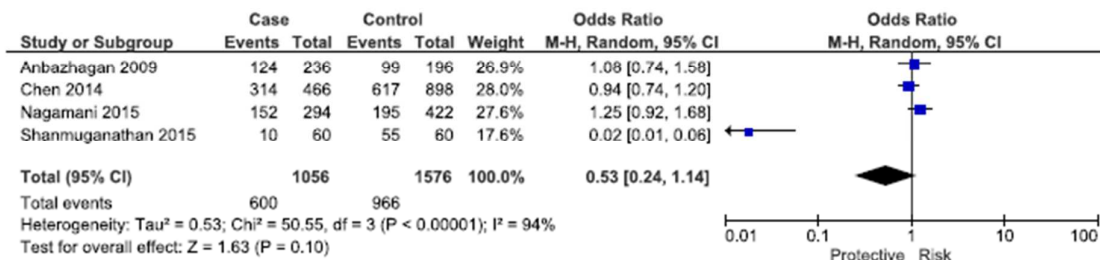

**Supplementary Figure S2g: ACE I/D investigation, individuals with end-stage renal disease compared to healthy controls in a European Population (insertion compared to deletion)**

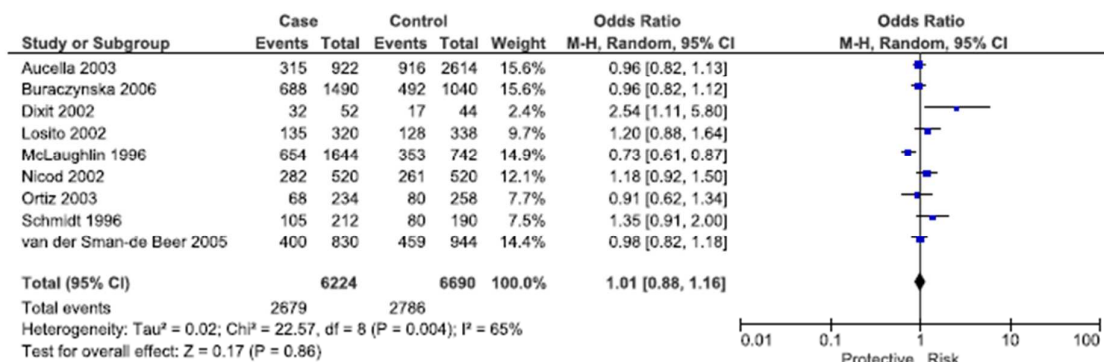

**Supplementary Figure S2h: ACE I/D investigation, individuals with primary glomerulonephritis compared to healthy controls in a European Population (insertion compared to deletion)**

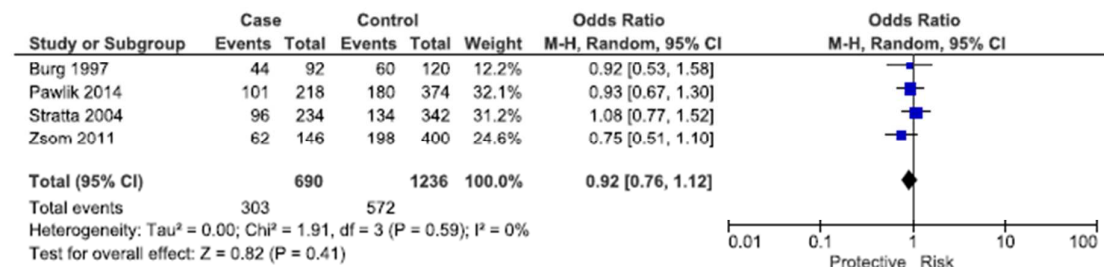

**Supplementary Figure S2i: ACE I/D investigation, individuals who have had renal transplants compared to healthy controls in a European Population (insertion compared to deletion)**

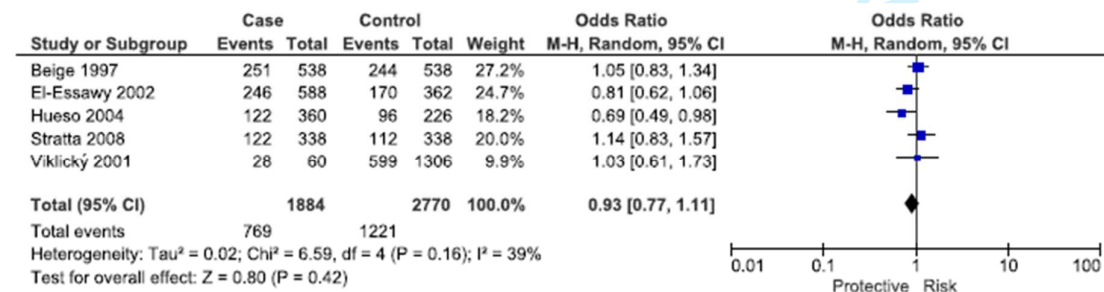

**Supplementary Figure S2j: ACE I/D investigation, individuals with end-stage renal disease linked to type 2 diabetic nephropathy compared to individuals with type 2 diabetes mellitus in an East Asian Population (insertion compared to deletion)**

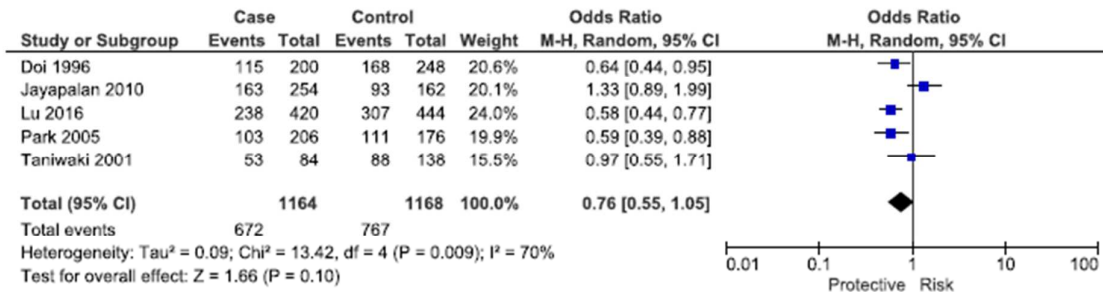

**Supplementary Figure S2k: ACE I/D investigation, individuals with end-stage renal disease linked to type 2 diabetic nephropathy compared to individuals with type 2 diabetes mellitus in a European Population (insertion compared to deletion)**

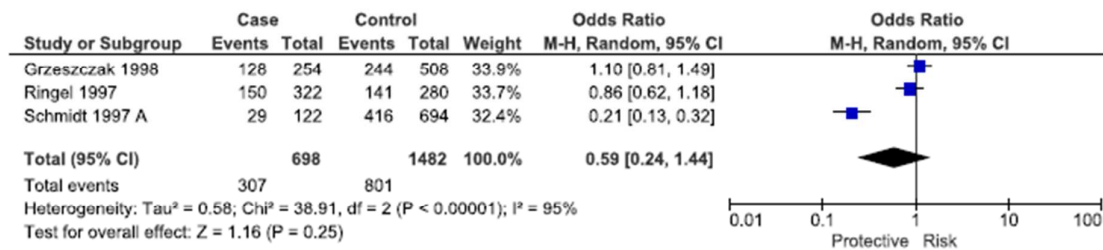



**AGT**

**Supplementary Figure S2l: AGT rs699 investigation, individuals with type 1 diabetic nephropathy compared to individuals with type 1 diabetes mellitus in a European Population (T allele compared to C)**

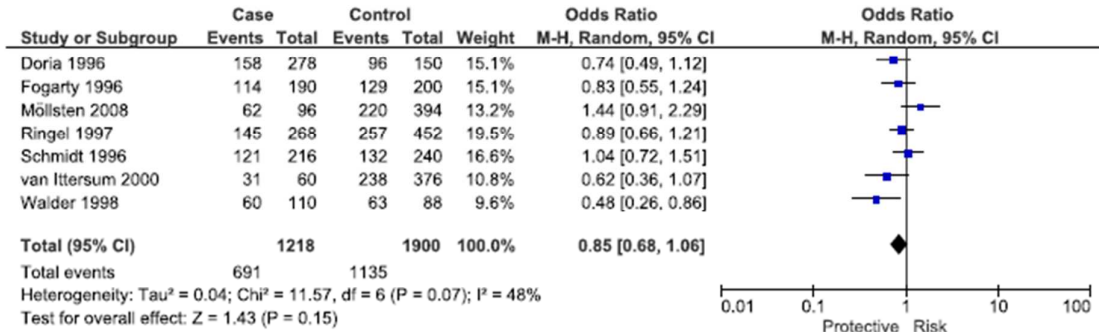

**Supplementary Figure S2m: AGT rs699 investigation, individuals with type 2 diabetic nephropathy compared to individuals with type 2 diabetes mellitus in an East Asian Population (T allele compared to C)**

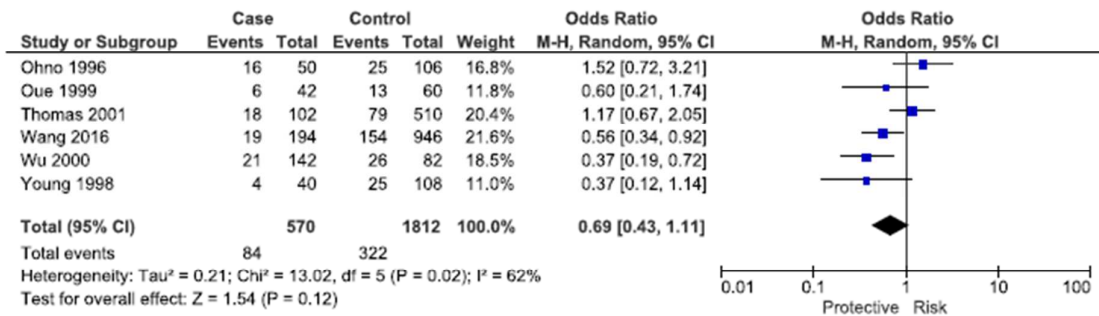

**Supplementary Figure S2n: AGT rs699 investigation, individuals with type 2 diabetic nephropathy compared to individuals with type 2 diabetes mellitus in a European Population (T allele compared to C)**

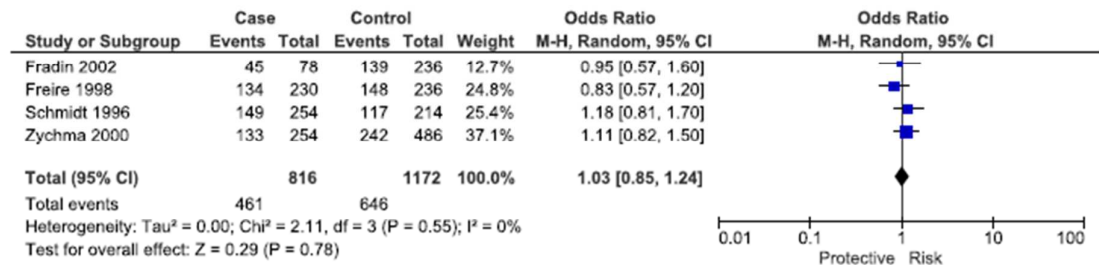

Supplementary Figure S2o: *AGT* rs699 investigation, individuals with type 2 diabetic nephropathy compared to individuals with type 2 diabetes mellitus in a Middle Eastern Population (T allele compared to C)

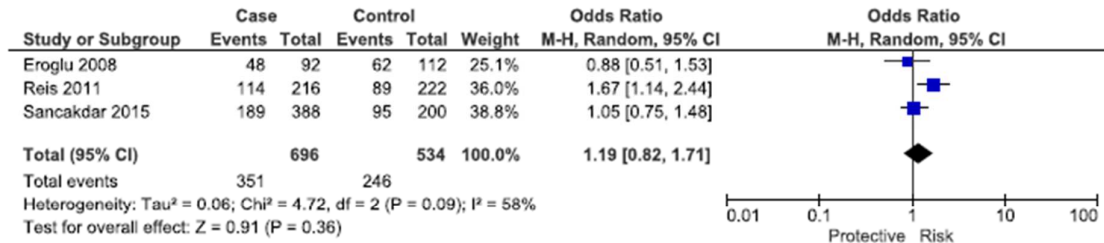

Supplementary Figure S2p: *AGT* rs699 investigation, individuals with IgA nephropathy compared to healthy controls in an East Asian Population (T allele compared to C)

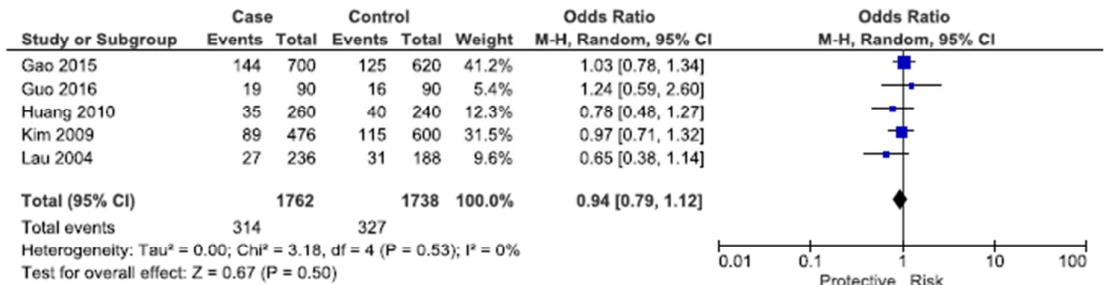

Supplementary Figure S2q: *AGT* rs699 investigation, individuals with end-stage renal disease compared to healthy controls in an East Asian Population (T allele compared to C)

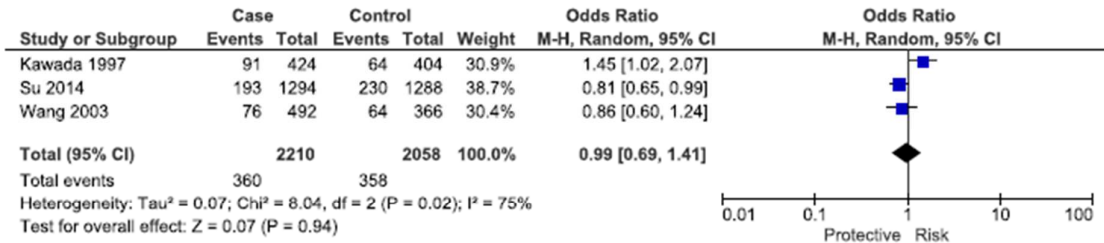

**AGTR1**

**Supplementary Figure S2r: AGTR1 rs5186 investigation, individuals with type 1 diabetic nephropathy compared to individuals with type 1 diabetes mellitus in a European Population (A allele compared to C allele)**

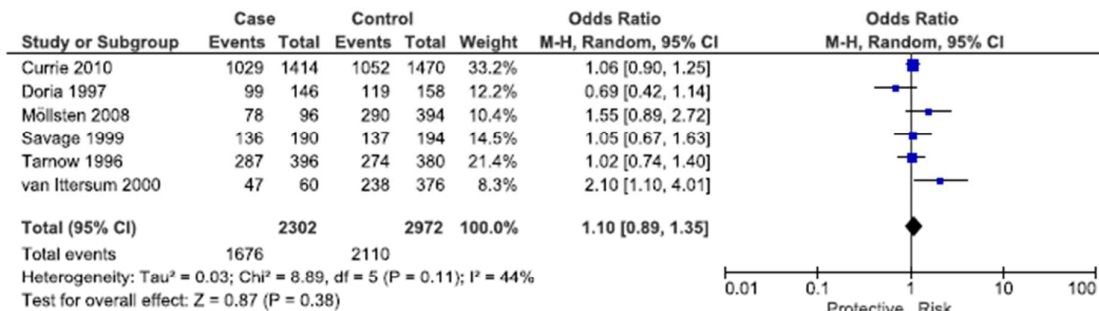

**Supplementary Figure S2s: AGTR1 rs5186 investigation, individuals with type 2 diabetic nephropathy compared to individuals with type 2 diabetes mellitus in an East Asian Population (A allele compared to C allele)**

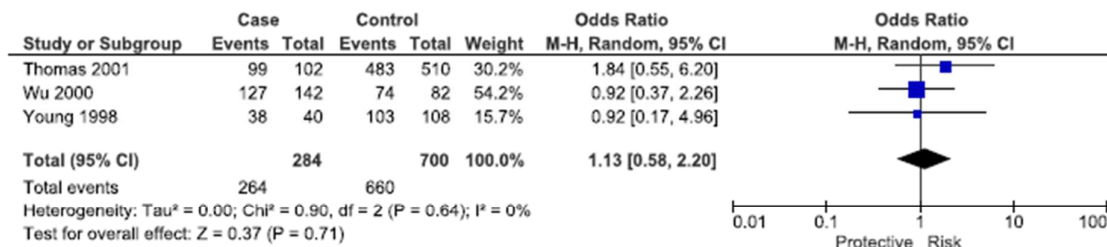

**Supplementary Figure S2t: AGTR1 rs5186 investigation, individuals with IgA nephropathy compared to healthy controls in an East Asian Population (A allele compared to C allele)**

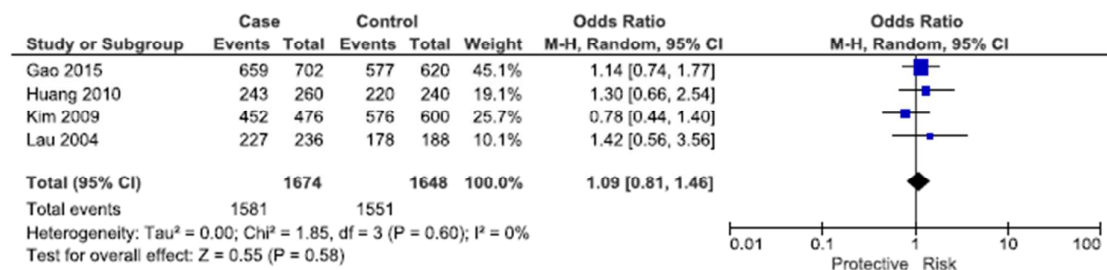

Supplementary Figure S3: Funnel Plots

ACE I/D investigation, individuals with type 2 diabetic nephropathy compared to individuals with type 2 diabetes mellitus in an East Asian Population (insertion compared to deletion)

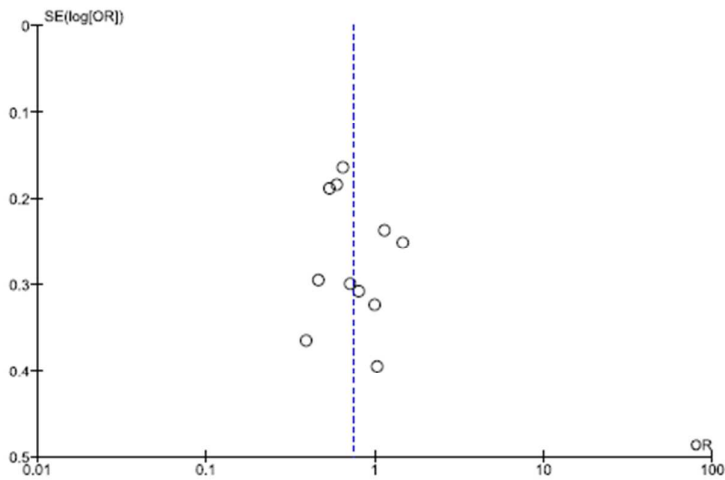

ACE I/D investigation, individuals with type 2 diabetic nephropathy compared to individuals with type 2 diabetes mellitus in a South Asian Population (insertion compared to deletion)

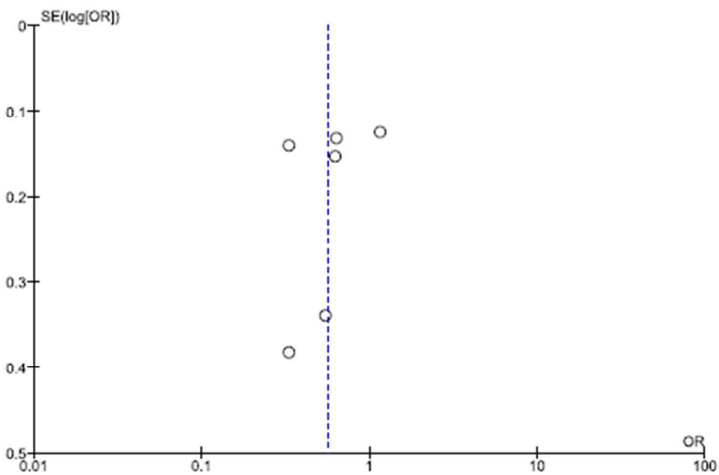

**ACE I/D investigation, individuals with end-stage renal disease compared to healthy controls in an East Asian Population (insertion compared to deletion)**

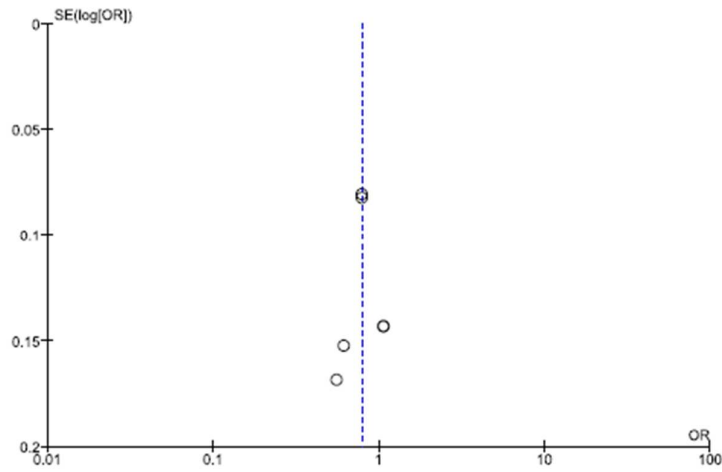

**ACE I/D investigation, individuals with type 1 diabetic nephropathy compared to individuals with type 1 diabetes mellitus in a European Population (insertion compared to deletion)**

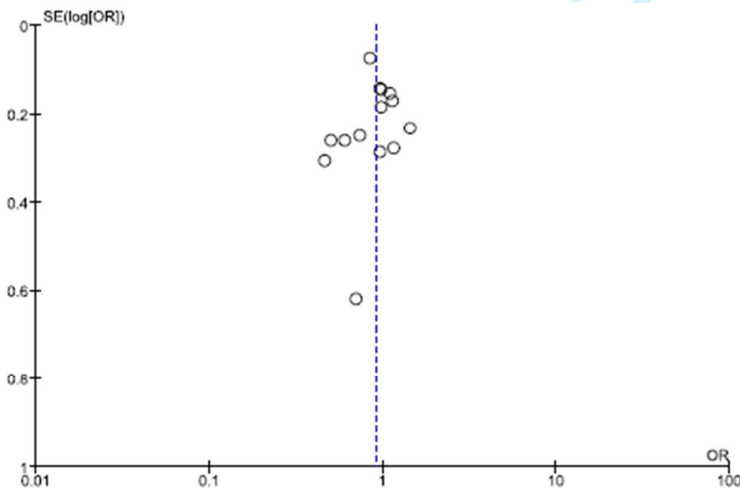

**ACE I/D investigation, individuals with type 2 diabetic nephropathy compared to individuals with type 2 diabetes mellitus in a European Population (insertion compared to deletion)**

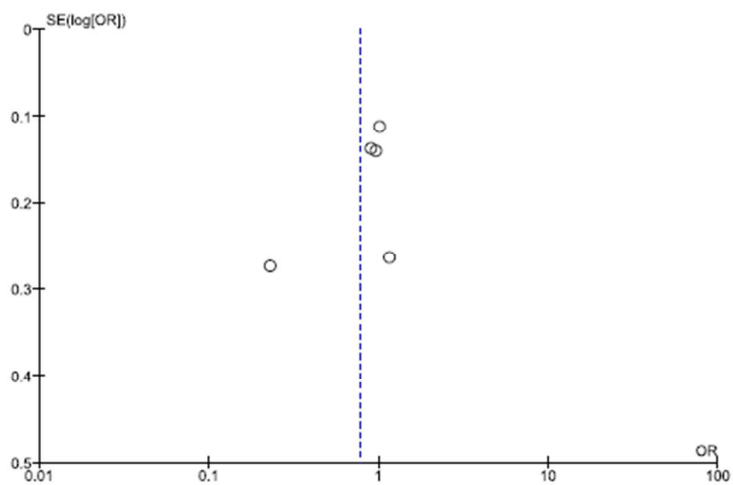

**ACE I/D investigation, individuals with type 2 diabetic nephropathy compared to individuals with type 2 diabetes mellitus in a Middle Eastern Population (insertion compared to deletion)**

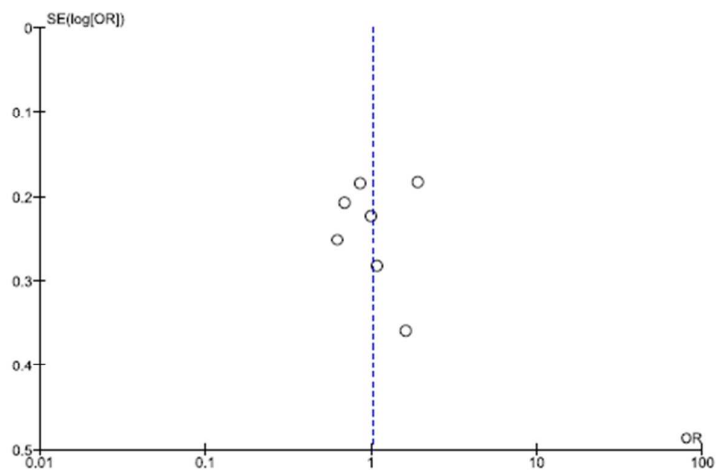

**ACE I/D investigation, individuals with IgA nephropathy compared to healthy controls in an East Asian Population (insertion compared to deletion)**

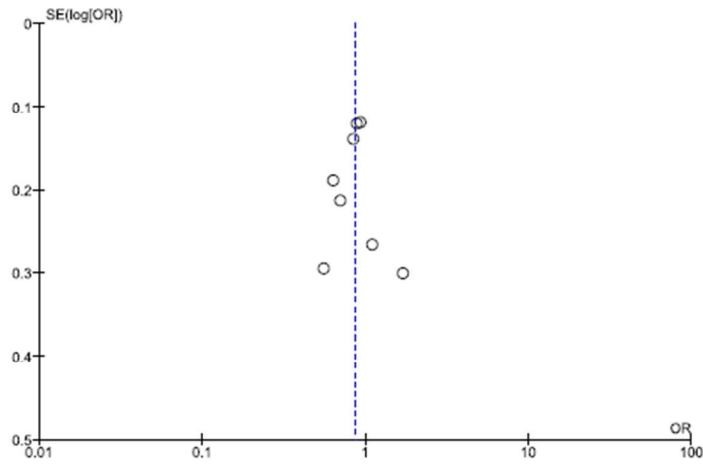

**ACE I/D investigation, individuals with IgA nephropathy compared to healthy controls in a European Population (insertion compared to deletion)**

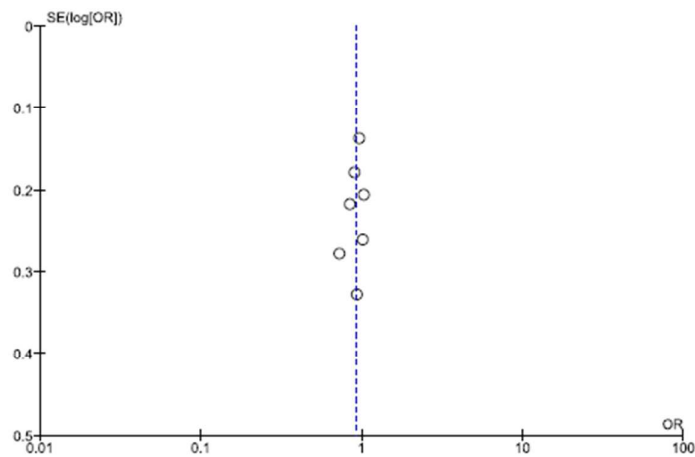

**ACE I/D investigation, individuals with chronic kidney disease compared to healthy controls in a South Asian Population (insertion compared to deletion)**

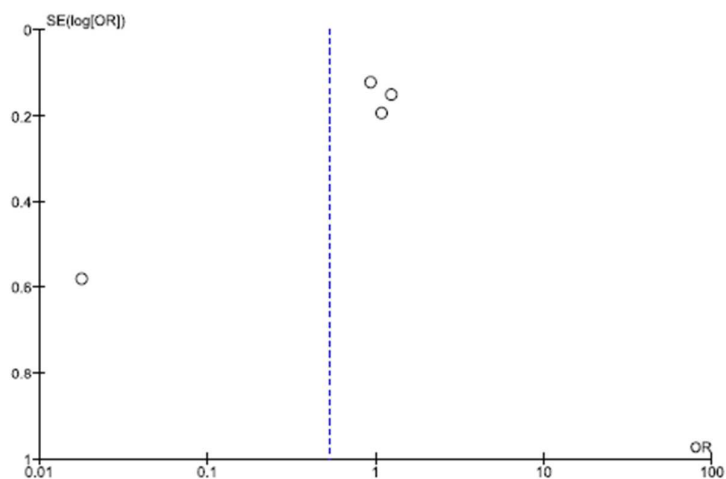

**ACE I/D investigation, individuals with end-stage renal disease compared to healthy controls in a European Population (insertion compared to deletion)**

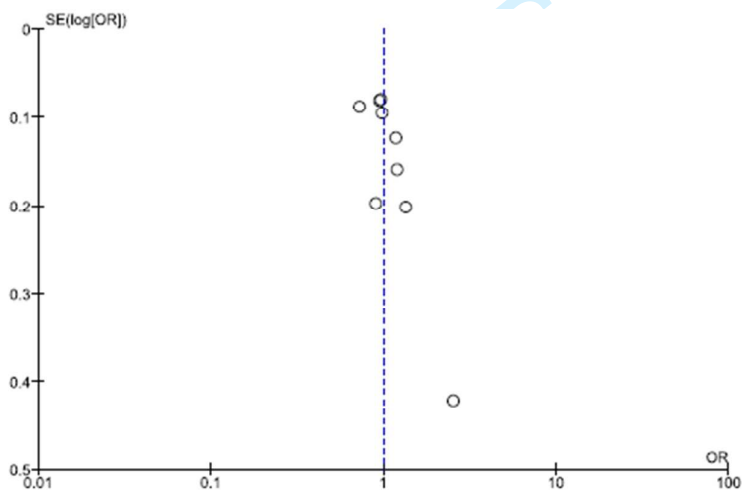



**ACE I/D investigation, individuals with primary glomerulonephritis compared to healthy controls in a European Population (insertion compared to deletion)**

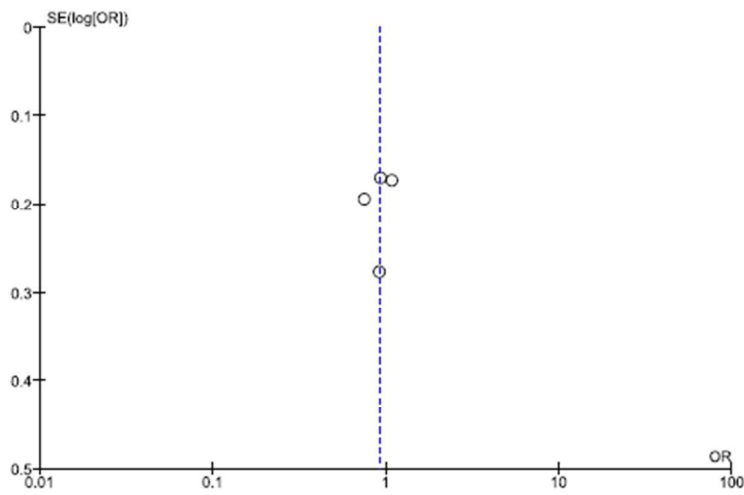

**ACE I/D investigation, individuals who have had renal transplants compared to healthy controls in a European Population (insertion compared to deletion)**

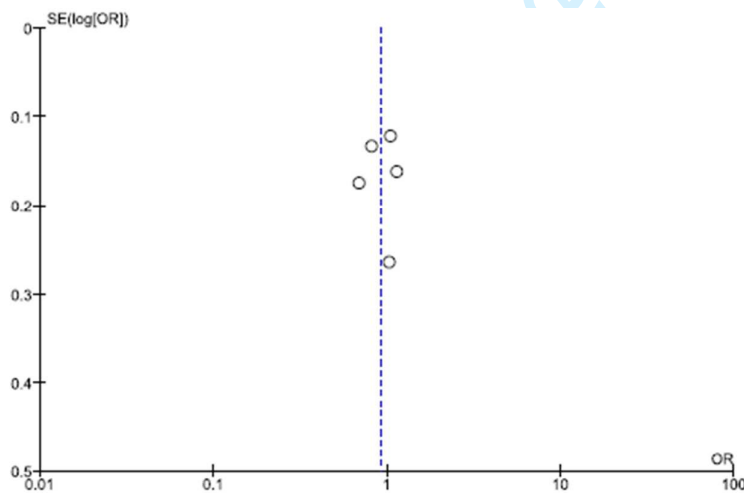

**ACE I/D investigation, individuals with end-stage renal disease linked to type 2 diabetic nephropathy compared to individuals with type 2 diabetes mellitus in an East Asian Population (insertion compared to deletion)**

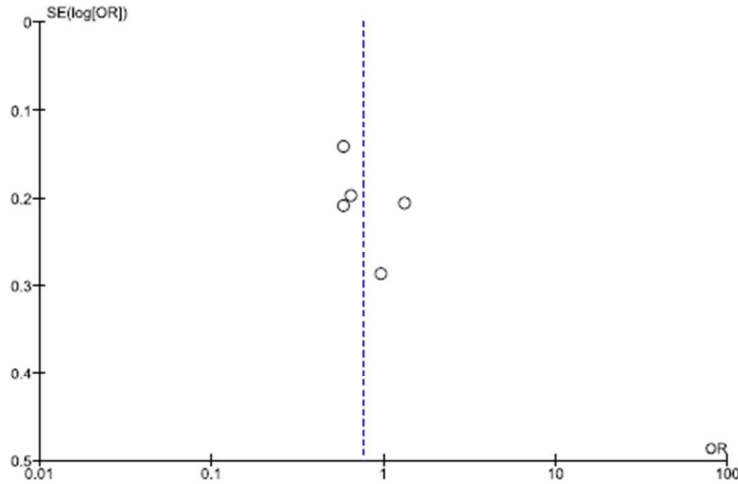

**ACE I/D investigation, individuals with end-stage renal disease linked to type 2 diabetic nephropathy compared to individuals with type 2 diabetes mellitus in a European Population (insertion compared to deletion)**

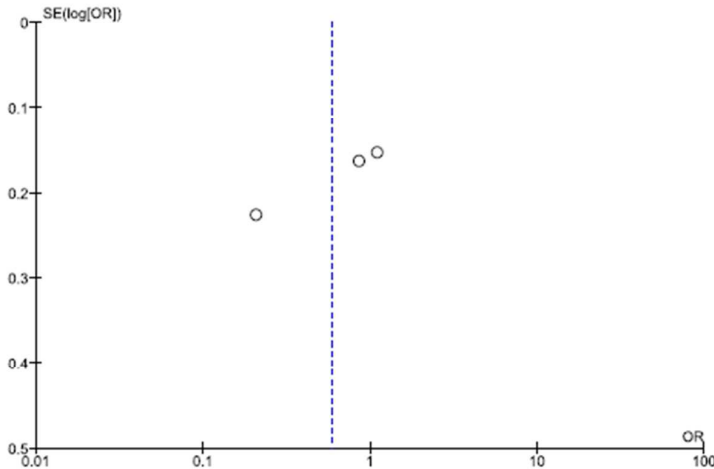

**AGT rs699 investigation, individuals with end-stage renal disease compared to healthy controls in a European Population (T allele compared to C)**

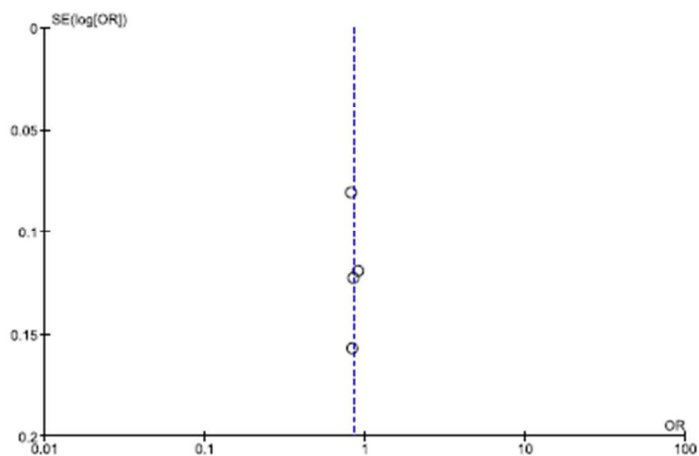

**AGT rs699 investigation, individuals with type 1 diabetic nephropathy compared to individuals with type 1 diabetes mellitus in a European Population (T allele compared to C)**

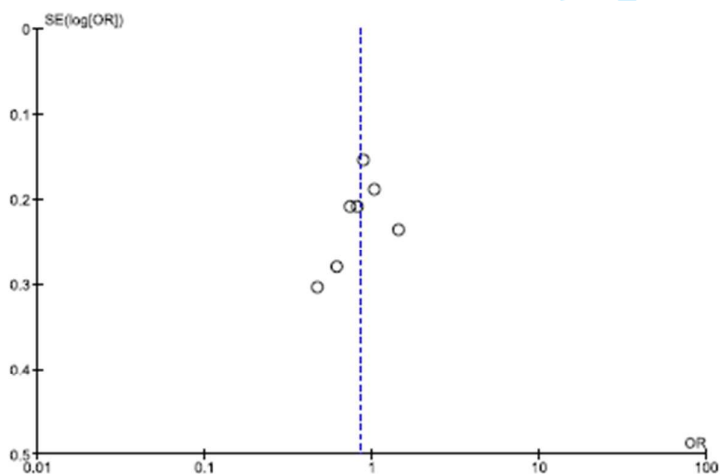

**AGT rs699 investigation, individuals with type 2 diabetic nephropathy compared to individuals with type 2 diabetes mellitus in an East Asian Population (T allele compared to C)**

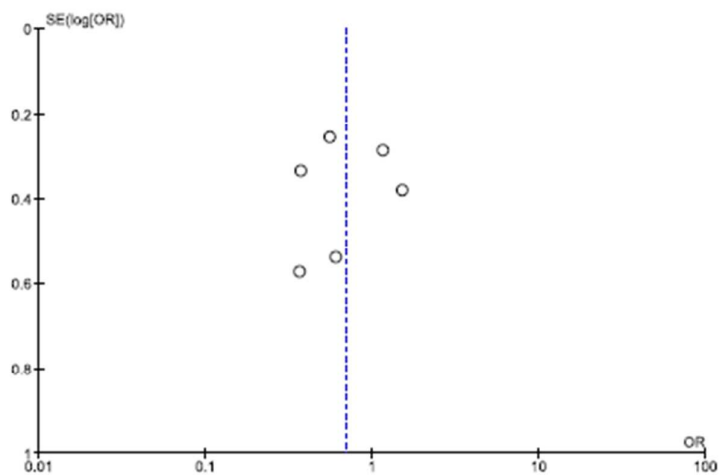

**AGT rs699 investigation, individuals with type 2 diabetic nephropathy compared to individuals with type 2 diabetes mellitus in a European Population (T allele compared to C)**

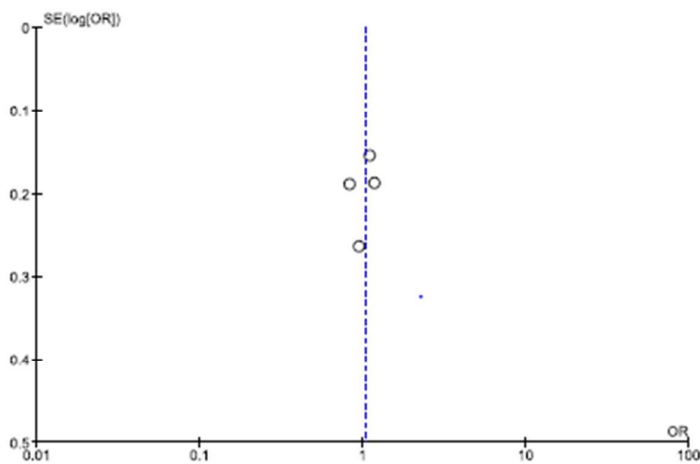

**AGT rs699 investigation, individuals with type 2 diabetic nephropathy compared to individuals with type 2 diabetes mellitus in a Middle Eastern Population (T allele compared to C)**

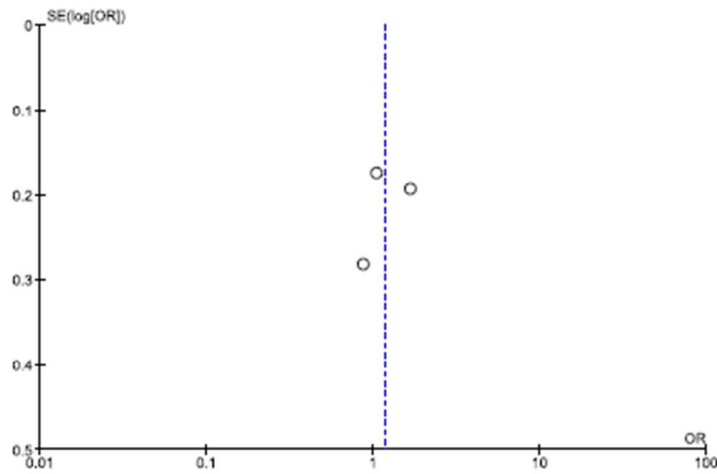

**AGT rs699 investigation, individuals with IgA nephropathy compared to healthy controls in an East Asian Population (T allele compared to C)**

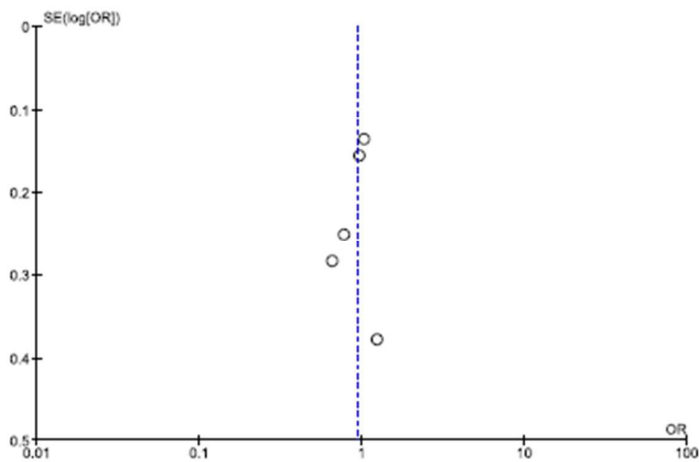

**AGT rs699 investigation, individuals with end-stage renal disease compared to healthy controls in an East Asian Population (T allele compared to C)**

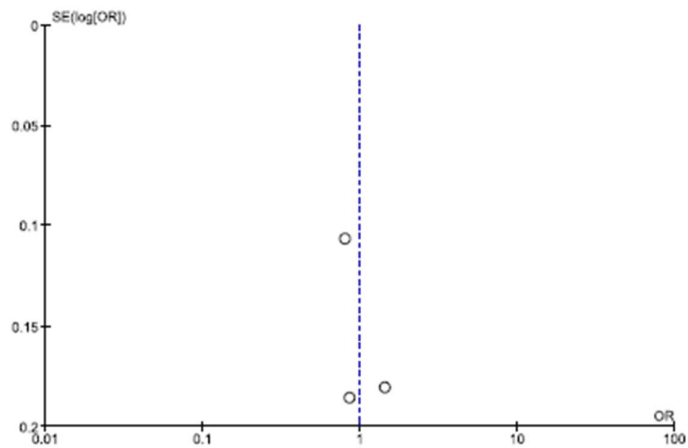

Peer review only

**AGTR1 rs5186 investigation, individuals with type 2 diabetic nephropathy compared to individuals with type 2 diabetes mellitus in a South Asian Population (A allele compared to C allele)**

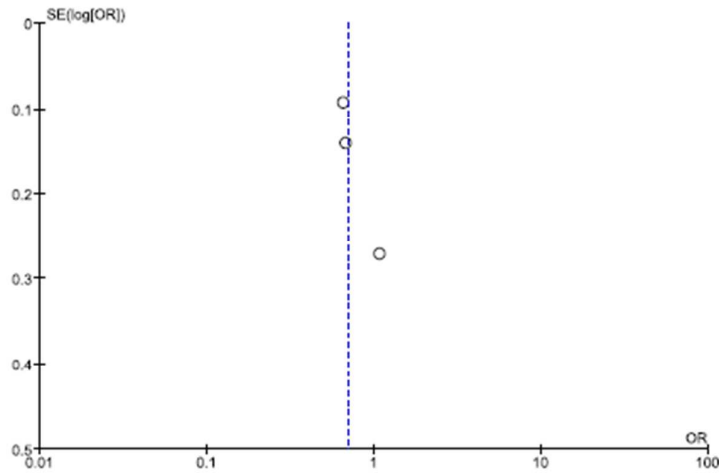

**AGTR1 rs5186 investigation, individuals with type 1 diabetic nephropathy compared to individuals with type 1 diabetes mellitus in a European Population (A allele compared to C allele)**

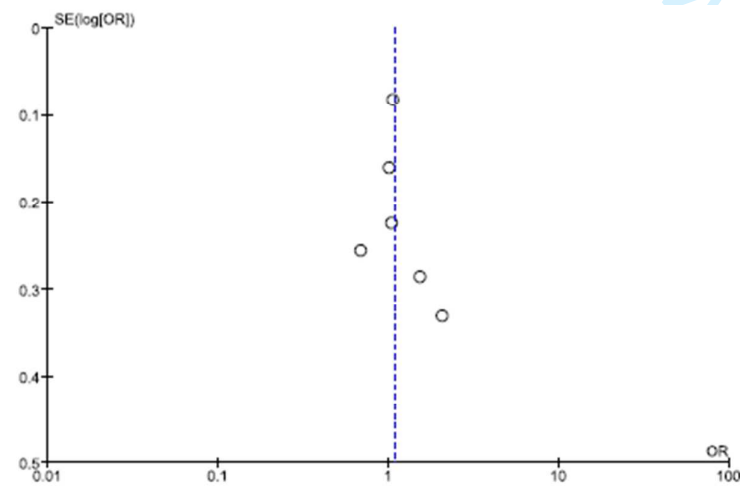



**AGTR1 rs5186 investigation, individuals with type 2 diabetic nephropathy compared to individuals with type 2 diabetes mellitus in an East Asian Population (A allele compared to C allele)**

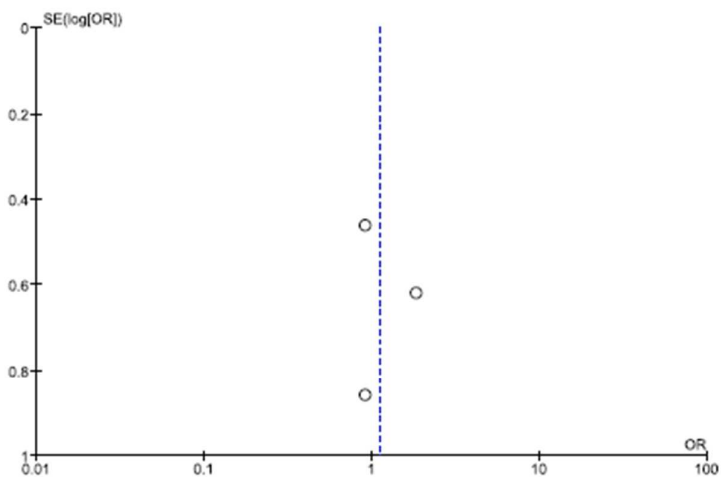

**AGTR1 rs5186 investigation, individuals with IgA nephropathy compared to healthy controls in an East Asian Population (A allele compared to C allele)**

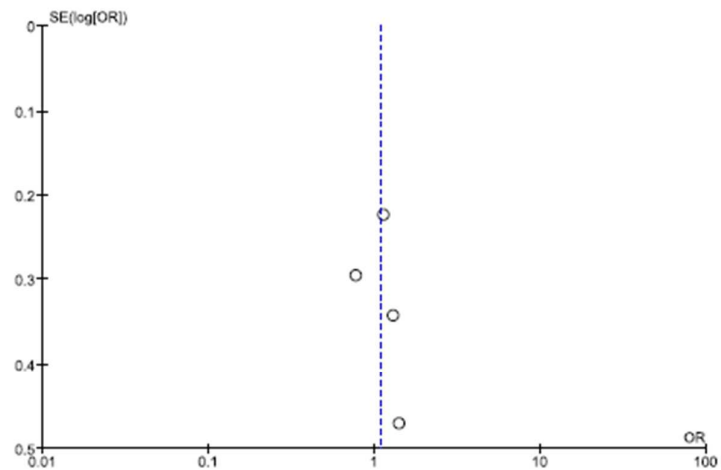

Supplementary Table S1: Search Terms

| <b>Gene</b> | <b>Search Terms</b>                                                                                                                                                                                                                                                                                                                                                                                                                                                                                                                                                                                               |
|-------------|-------------------------------------------------------------------------------------------------------------------------------------------------------------------------------------------------------------------------------------------------------------------------------------------------------------------------------------------------------------------------------------------------------------------------------------------------------------------------------------------------------------------------------------------------------------------------------------------------------------------|
| <i>ACE</i>  | Angiotensin I Converting Enzyme<br>Angiotensin I Converting Enzyme (Peptidyl-Dipeptidase A) 1<br>Dipeptidyl Carboxypeptidase I<br>CD143 Antigen<br>Kininase II<br>DCP1<br>DCP<br>Angiotensin I Converting Enzyme Peptidyl-Dipeptidase A 1<br>Transcript<br>Angiotensin Converting Enzyme, Somatic Isoform<br>Peptidyl-Dipeptidase A<br>Carboxycathepsin<br>Testicular ECA<br>Peptidase P<br>EC 3.4.15.1<br>EC 3.2.1.-<br>CD143<br>MVCD3<br>ACE1<br>ACE<br>ICH<br><br><u>AND</u><br><br>Kidney<br>Nephrology<br>Nephropathy<br>Renal<br><br><u>AND</u><br><br>SNP<br>Polymorphism<br>Variant<br>Allele<br>Genotype |
| <i>ACE2</i> | Angiotensin I Converting Enzyme 2<br>Angiotensin I Converting Enzyme (Peptidyl-Dipeptidase A) 2<br>Angiotensin-Converting Enzyme Homolog<br>ACE-Related Carboxypeptidase<br>Metalloprotease MPROT15<br>Peptidyl-Dipeptidase A<br>ACEH<br>EC 3.4.17.23<br>EC 3.4.17<br>ACE2<br><br><u>AND</u>                                                                                                                                                                                                                                                                                                                      |

|              |                                                                                                                                                                                                                                                                                                                                                                                                                                                                                                                   |
|--------------|-------------------------------------------------------------------------------------------------------------------------------------------------------------------------------------------------------------------------------------------------------------------------------------------------------------------------------------------------------------------------------------------------------------------------------------------------------------------------------------------------------------------|
|              | Kidney<br>Nephrology<br>Nephropathy<br>Renal<br><br><u>AND</u><br><br>SNP<br>Polymorphism<br>Variant<br>Allele<br>Genotype                                                                                                                                                                                                                                                                                                                                                                                        |
| <i>AGT</i>   | Angiotensinogen<br>Angiotensinogen (Serpine Peptidase Inhibitor, Clade A, Member 8)<br>Serpin Peptidase Inhibitor, Clade A, Member 8<br>Serpin A8<br>SERPINA8<br>Serine (Or Cysteine) Proteinase Inhibitor<br>Alpha-1 Antitrypsin, Antitrypsin<br>Alpha-1 Antitrypsin<br>Pre-Angiotensinogen<br>Angiotensin II<br>Angiotensin I<br>Antitrypsin<br>ANHU<br>AGT<br><br><u>AND</u><br><br>Kidney<br>Nephrology<br>Nephropathy<br>Renal<br><br><u>AND</u><br><br>SNP<br>Polymorphism<br>Variant<br>Allele<br>Genotype |
| <i>AGTR1</i> | Angiotensin II Receptor Type 1<br>Angiotensin II Receptor, Type 1<br>AGTR1B<br>AT1AR<br>AT1BR<br>AT2R1<br>AT1<br>Type-1B Angiotensin II Receptor<br>Angiotensin II Type-1 Receptor<br>Angiotensin Receptor 1B                                                                                                                                                                                                                                                                                                     |

|              |                                                                                                                                                                                                                                                                                                                                             |
|--------------|---------------------------------------------------------------------------------------------------------------------------------------------------------------------------------------------------------------------------------------------------------------------------------------------------------------------------------------------|
|              | <p>AGTR1A<br/> AT2R1B<br/> HAT1R<br/> AG2S<br/> AT1B<br/> AT1R<br/> AGTR1<br/> AT2R1A</p> <p><u>AND</u></p> <p>Kidney<br/> Nephrology<br/> Nephropathy<br/> Renal</p> <p><u>AND</u></p> <p>SNP<br/> Polymorphism<br/> Variant<br/> Allele<br/> Genotype</p>                                                                                 |
| <i>AGTR2</i> | <p>Angiotensin II Receptor Type 2<br/> Angiotensin II Receptor, Type 2<br/> Angiotensin II Type-2 Receptor<br/> AT2<br/> Angiotensin Receptor 2<br/> ATGR2<br/> MRX88</p> <p><u>AND</u></p> <p>Kidney<br/> Nephrology<br/> Nephropathy<br/> Renal</p> <p><u>AND</u></p> <p>SNP<br/> Polymorphism<br/> Variant<br/> Allele<br/> Genotype</p> |
| <i>REN</i>   | <p>Renin<br/> Angiotensinogenase<br/> EC 3.4.23.15<br/> Angiotensin-Forming Enzyme<br/> Renin Precursor, Renal<br/> EC 3.4.23</p>                                                                                                                                                                                                           |

|                                                      |                                                                                                                                                                  |
|------------------------------------------------------|------------------------------------------------------------------------------------------------------------------------------------------------------------------|
|                                                      | HNFJ2<br>REN<br><br><u>AND</u><br><br>Kidney<br>Nephrology<br>Nephropathy<br>Renal<br><br><u>AND</u><br><br>SNP<br>Polymorphism<br>Variant<br>Allele<br>Genotype |
| <i>Additional filters added to database searches</i> | English / Spanish language<br>Human studies<br>Case / Control studies<br>Not clinical trials<br>Not review articles<br>Not a case report<br>Not a meta-analysis  |

**Supplementary Table S2: Ethnicity Codes**

| <b>Population</b>                                    | <b>Population Code</b> |
|------------------------------------------------------|------------------------|
| Ad Mixed American (Southern USA and Central America) | AMR                    |
| African American                                     | AFR                    |
| East Asian                                           | EAS                    |
| European                                             | EUR                    |
| Middle Eastern                                       | ME                     |
| Mix of ethnicities                                   | MIX                    |
| North African                                        | NA                     |
| South Asian                                          | SAS                    |

**Supplementary Table S3a: Excluded studies from the ACE search**

Included in accompanying MS Excel Workbook

\*Exclusion stage relates to the stage at which the article was removed as shown in the flow diagram (Supplementary Figure S1a)

**Supplementary Table S3b: Excluded studies from the ACE2 search**

Included in accompanying MS Excel Workbook

\*Exclusion stage relates to the stage at which the article was removed as shown in the flow diagram (Supplementary Figure S1b)

**Supplementary Table S3c: Excluded studies from the AGT search**

Included in accompanying MS Excel Workbook

\*Exclusion stage relates to the stage at which the article was removed as shown in the flow diagram (Supplementary Figure S1c)

**Supplementary Table S3d: Excluded studies from the AGTR1 search**

Included in accompanying MS Excel Workbook

\*Exclusion stage relates to the stage at which the article was removed as shown in the flow diagram (Supplementary Figure S1d)

**Supplementary Table S3e: Excluded studies from the AGTR2 search**

Included in accompanying MS Excel Workbook

\*Exclusion stage relates to the stage at which the article was removed as shown in the flow diagram (Supplementary Figure S1e)

**Supplementary Table S3f: Excluded studies from the REN search**

Included in accompanying MS Excel Workbook

\*Exclusion stage relates to the stage at which the article was removed as shown in the flow diagram (Supplementary Figure S1f)

**Supplementary Table S4: Data included in quantitative analysis for ACE**

| Author                            | Year | Ethnicity | SNP     | Cases      |     |             |             | Controls   |      |             |             |
|-----------------------------------|------|-----------|---------|------------|-----|-------------|-------------|------------|------|-------------|-------------|
|                                   |      |           |         | Definition | N   | I Frequency | D Frequency | Definition | N    | I Frequency | D Frequency |
| Anbazhagan K et al.(55)           | 2009 | SAS       | Ins/Del | CKD        | 118 | 124         | 112         | Healthy    | 98   | 99          | 97          |
| Chen WJ et al.(56)                | 2014 | SAS       | Ins/Del | CKD        | 233 | 314         | 152         | Healthy    | 449  | 617         | 281         |
| Nagamani S et al.(57)             | 2015 | SAS       | Ins/Del | CKD        | 147 | 152         | 142         | Healthy    | 221  | 195         | 227         |
| Shanmuganathan R et al.(58)       | 2015 | SAS       | Ins/Del | CKD        | 30  | 10          | 50          | Healthy    | 30   | 55          | 5           |
| Ali A et al.(59)                  | 2015 | EAS       | Ins/Del | ESRD       | 190 | 219         | 161         | Healthy    | 190  | 262         | 118         |
| Kawada N et al.(22)               | 1997 | EAS       | Ins/Del | ESRD       | 216 | 280         | 152         | Healthy    | 208  | 264         | 152         |
| Su SL et al.(60)                  | 2014 | EAS       | Ins/Del | ESRD       | 647 | 792         | 502         | Healthy    | 644  | 859         | 429         |
| Tang FY et al.(61)                | 2008 | EAS       | Ins/Del | ESRD       | 153 | 100         | 206         | Healthy    | 148  | 138         | 158         |
| Wang AY et al.(62)                | 2003 | EAS       | Ins/Del | ESRD       | 246 | 316         | 176         | Healthy    | 183  | 230         | 136         |
| Yang HY et al.(63)                | 2015 | EAS       | Ins/Del | ESRD       | 683 | 833         | 533         | Healthy    | 653  | 867         | 439         |
| Buraczynska M et al.(64)          | 2006 | EUR       | Ins/Del | ESRD       | 745 | 688         | 802         | Healthy    | 520  | 492         | 548         |
| Dixit M et al.(65)                | 2002 | EUR       | Ins/Del | ESRD       | 26  | 32          | 20          | Healthy    | 22   | 17          | 27          |
| Losito A et al.(66)               | 2002 | EUR       | Ins/Del | ESRD       | 160 | 135         | 185         | Healthy    | 169  | 128         | 210         |
| McLaughlin KJ et al.(67)          | 1996 | EUR       | Ins/Del | ESRD       | 460 | 654         | 990         | Healthy    | 371  | 353         | 389         |
| Nicod J et al.(68)                | 2002 | EUR       | Ins/Del | ESRD       | 260 | 282         | 238         | Healthy    | 260  | 261         | 259         |
| Ortiz MA et al.(69)               | 2003 | EUR       | Ins/Del | ESRD       | 117 | 68          | 166         | Healthy    | 129  | 80          | 178         |
| Schmidt A et al.(70)              | 1996 | EUR       | Ins/Del | ESRD       | 106 | 105         | 107         | Healthy    | 95   | 80          | 110         |
| van der Sman-de Beer F et al.(71) | 2005 | EUR       | Ins/Del | ESRD       | 415 | 400         | 430         | Healthy    | 472  | 459         | 485         |
| Aucella F et al.(72)              | 2003 | EUR       | Ins/Del | ESRD       | 461 | 315         | 607         | Healthy    | 1307 | 916         | 1698        |
| Guo Y et al.(73)                  | 2016 | EAS       | Ins/Del | IgAN       | 45  | 54          | 36          | Healthy    | 45   | 42          | 48          |
| Huang HD et al.(50)               | 2010 | EAS       | Ins/Del | IgAN       | 130 | 155         | 105         | Healthy    | 120  | 168         | 72          |
| Jung ES et al.(74)                | 2010 | EAS       | Ins/Del | IgAN       | 261 | 298         | 224         | Healthy    | 300  | 360         | 240         |
| Lau YK et al.(25)                 | 2004 | EAS       | Ins/Del | IgAN       | 118 | 154         | 82          | Healthy    | 94   | 137         | 51          |
| Suzuki H et al.(75)               | 2004 | EAS       | Ins/Del | IgAN       | 319 | 378         | 260         | Healthy    | 270  | 328         | 212         |
| Yoon HJ et al.(76)                | 2002 | EAS       | Ins/Del | IgAN       | 191 | 204         | 178         | Healthy    | 233  | 268         | 198         |



|    |                          |      |     |         |                |     |     |     |              |     |     |     |
|----|--------------------------|------|-----|---------|----------------|-----|-----|-----|--------------|-----|-----|-----|
| 1  |                          |      |     |         |                |     |     |     |              |     |     |     |
| 2  |                          |      |     |         |                |     |     |     |              |     |     |     |
| 3  |                          |      |     |         |                |     |     |     |              |     |     |     |
| 4  |                          |      |     |         |                |     |     |     |              |     |     |     |
| 5  | Yorioka T et al.(77)     | 1995 | EAS | Ins/Del | IgAN           | 48  | 67  | 29  | Healthy      | 104 | 139 | 67  |
| 6  | Yoshida H et al.(78)     | 1995 | EAS | Ins/Del | IgAN           | 53  | 57  | 49  | Healthy      | 46  | 62  | 30  |
| 7  | Burg M et al. *(79)      | 1997 | EUR | Ins/Del | IgAN           | 70  | 26  | 28  | Healthy      | 60  | 60  | 60  |
| 8  | Drouet M et al.(80)      | 2002 | EUR | Ins/Del | IgAN           | 125 | 78  | 172 | Healthy      | 83  | 54  | 100 |
| 9  | Harden PN et al.(81)     | 1995 | EUR | Ins/Del | IgAN           | 100 | 79  | 121 | Healthy      | 98  | 76  | 120 |
| 10 | Pawlik M et al. *(82)    | 2014 | EUR | Ins/Del | IgAN           | 31  | 25  | 37  | Healthy      | 187 | 180 | 194 |
| 11 | Pei Y et al.(83)         | 1997 | EUR | Ins/Del | IgAN           | 168 | 145 | 191 | Healthy      | 100 | 91  | 109 |
| 12 | Schmidt S et al. (B)(84) | 1995 | EUR | Ins/Del | IgAN           | 204 | 168 | 240 | Healthy      | 234 | 197 | 271 |
| 13 | Stratta P et al.(85)     | 1999 | EUR | Ins/Del | IgAN           | 81  | 62  | 100 | Healthy      | 50  | 38  | 62  |
| 14 | Burg M et al. *(79)      | 1997 | EUR | Ins/Del | Primary GN     | 46  | 44  | 48  | Healthy      | 60  | 60  | 60  |
| 15 | Pawlik M et al. *(82)    | 2014 | EUR | Ins/Del | Primary GN     | 109 | 101 | 117 | Healthy      | 187 | 180 | 194 |
| 16 |                          |      |     |         |                |     |     |     |              |     |     |     |
| 17 |                          |      |     |         |                |     |     |     | Organ        |     |     |     |
| 18 | Stratta P et al.(86)     | 2004 | EUR | Ins/Del | Primary GN     | 117 | 96  | 138 | donors       | 171 | 134 | 208 |
| 19 | Zsom M et al.(87)        | 2011 | EUR | Ins/Del | Primary GN     | 73  | 62  | 84  | Healthy      | 200 | 198 | 202 |
| 20 |                          |      |     |         |                |     |     |     |              |     |     |     |
| 21 | Beige J et al.(88)       | 1997 | EUR | Ins/Del | RTx recipients | 269 | 251 | 287 | Kidney Donor | 269 | 244 | 294 |
| 22 |                          |      |     |         |                |     |     |     |              |     |     |     |
| 23 | El-Essawy AB et al.(89)  | 2002 | EUR | Ins/Del | RTx recipients | 294 | 246 | 342 | Healthy      | 181 | 170 | 192 |
| 24 |                          |      |     |         |                |     |     |     |              |     |     |     |
| 25 |                          |      |     |         |                |     |     |     | Healthy &    |     |     |     |
| 26 | Hueso M et al.(90)       | 2004 | EUR | Ins/Del | RTx recipients | 180 |     |     | cadaveric    | 113 |     |     |
| 27 |                          |      |     |         |                |     |     |     | renal        |     |     |     |
| 28 |                          |      |     |         |                |     |     |     | allograft    |     |     |     |
| 29 |                          |      |     |         |                |     |     |     | donors       |     | 96  | 130 |
| 30 |                          |      |     |         |                |     |     |     |              |     |     |     |
| 31 | Stratta P et al. (91)    | 2008 | EUR | Ins/Del | RTx recipients | 169 | 122 | 216 | Healthy      | 169 | 112 | 226 |
| 32 |                          |      |     |         |                |     |     |     |              |     |     |     |
| 33 | Viklický O et al.(92)    | 2001 | EUR | Ins/Del | RTx recipients | 30  | 28  | 32  | Healthy      | 653 | 599 | 707 |
| 34 | Barnas U et al.(93)      | 1997 | EUR | Ins/Del | T1DN           | 63  | 45  | 55  | T1DM         | 59  | 51  | 29  |
| 35 | Chowdhury TA et al.(94)  | 1996 | EUR | Ins/Del | T1DN           | 242 | 204 | 280 | T1DM         | 166 | 143 | 189 |
| 36 | Currie D et al.(95)      | 2010 | EUR | Ins/Del | T1DN           | 718 | 603 | 777 | T1DM         | 749 | 696 | 764 |
| 37 | De Cosmo S et al.(96)    | 1999 | EUR | Ins/Del | T1DN           | 175 | 125 | 225 | T1DM         | 136 | 89  | 183 |
| 38 | Demurov LM et al.(97)    | 1997 | EUR | Ins/Del | T1DN           | 56  | 35  | 77  | T1DM         | 76  | 72  | 80  |
| 39 |                          |      |     |         |                |     |     |     |              |     |     |     |
| 40 |                          |      |     |         |                |     |     |     |              |     |     |     |
| 41 |                          |      |     |         |                |     |     |     |              |     |     |     |
| 42 |                          |      |     |         |                |     |     |     |              |     |     |     |
| 43 |                          |      |     |         |                |     |     |     |              |     |     |     |
| 44 |                          |      |     |         |                |     |     |     |              |     |     |     |
| 45 |                          |      |     |         |                |     |     |     |              |     |     |     |
| 46 |                          |      |     |         |                |     |     |     |              |     |     |     |
| 47 |                          |      |     |         |                |     |     |     |              |     |     |     |

|                            |      |     |         |      |     |     |     |      |     |      |     |
|----------------------------|------|-----|---------|------|-----|-----|-----|------|-----|------|-----|
| Hadjadj S et al.(98)       | 2001 | EUR | Ins/Del | T1DN | 6   | 4   | 8   | T1DM | 251 | 208  | 294 |
| Hibberd ML et al.(99)      | 1997 | EUR | Ins/Del | T1DN | 72  | 60  | 84  | T1DM | 86  | 57   | 115 |
| Marre M et al.(34)         | 1994 | EUR | Ins/Del | T1DN | 62  | 43  | 81  | T1DM | 62  | 58   | 66  |
| Ringel J et al. *(100)     | 1997 | EUR | Ins/Del | T1DN | 134 | 130 | 138 | T1DM | 226 | 208  | 244 |
| Schmidt S et al. (A)(101)  | 1995 | EUR | Ins/Del | T1DN | 114 | 86  | 142 | T1DM | 133 | 101  | 165 |
| Shestakova MV et al.(102)  | 2006 | EUR | Ins/Del | T1DN | 63  | 65  | 61  | T1DM | 66  | 78   | 54  |
| Tarnow L et al.(103)       | 1995 | EUR | Ins/Del | T1DN | 198 | 175 | 221 | T1DM | 190 | 169  | 211 |
| van Ittersum FJ et al.(53) | 2000 | EUR | Ins/Del | T1DN | 30  | 33  | 27  | T1DM | 188 | 192  | 184 |
| Walder B et al.(104)       | 1998 | EUR | Ins/Del | T1DN | 55  | 49  | 61  | T1DM | 44  | 40   | 48  |
| Fujisawa T et al.(105)     | 1995 | EAS | Ins/Del | T2DN | 54  | 71  | 37  | T2DM | 35  | 46   | 24  |
| Ha SK et al.(106)          | 2003 | EAS | Ins/Del | T2DN | 140 | 132 | 148 | T2DM | 99  | 123  | 75  |
| Hsieh MC et al.(107)       | 2000 | EAS | Ins/Del | T2DN | 179 | 219 | 139 | T2DM | 157 | 222  | 92  |
| Mizuiru S et al.(108)      | 1995 | EAS | Ins/Del | T2DN | 80  | 72  | 88  | T2DM | 31  | 33   | 29  |
| Nakajima S et al.(109)     | 1996 | EAS | Ins/Del | T2DN | 54  | 67  | 41  | T2DM | 41  | 55   | 27  |
| Ohno T et al.(110)         | 1996 | EAS | Ins/Del | T2DN | 25  | 28  | 22  | T2DM | 53  | 81   | 25  |
| Shin Y et al.(111)         | 2004 | EAS | Ins/Del | T2DN | 82  | 112 | 52  | T2DM | 59  | 70   | 48  |
| Thomas GN et al.(112)      | 2001 | EAS | Ins/Del | T2DN | 51  | 72  | 30  | T2DM | 255 | 346  | 164 |
| Wang M et al.(113)         | 2016 | EAS | Ins/Del | T2DN | 106 | 78  | 56  | T2DM | 741 | 1020 | 438 |
| Wu SH et al.(114)          | 2000 | EAS | Ins/Del | T2DN | 71  | 75  | 67  | T2DM | 41  | 58   | 24  |
| Young RP et al.(115)       | 1998 | EAS | Ins/Del | T2DN | 20  | 27  | 13  | T2DM | 54  | 72   | 36  |
| Dudley CR et al.(116)      | 1995 | EUR | Ins/Del | T2DN | 163 | 246 | 288 | T2DM | 267 | 246  | 288 |
| Fradin S et al.(117)       | 2002 | EUR | Ins/Del | T2DN | 39  | 94  | 142 | T2DM | 118 | 94   | 142 |
| Ng DPK et al.(118)         | 2006 | EUR | Ins/Del | T2DN | 291 | 147 | 187 | T2DM | 167 | 147  | 187 |
| Nikzamir A et al.(119)     | 2009 | EUR | Ins/Del | T2DN | 48  | 159 | 131 | T2DM | 145 | 159  | 131 |
| Schmidt S et al. (B)(120)  | 1997 | EUR | Ins/Del | T2DN | 311 | 278 | 416 | T2DM | 347 | 278  | 416 |
| Al-Harbi EM et al.(121)    | 2011 | ME  | Ins/Del | T2DN | 110 | 63  | 157 | T2DM | 196 | 125  | 267 |
| Araz M et al.(122)         | 2001 | ME  | Ins/Del | T2DN | 62  | 52  | 72  | T2DM | 123 | 103  | 143 |
| El-Baz R et al.(123)       | 2012 | ME  | Ins/Del | T2DN | 102 | 66  | 138 | T2DM | 100 | 82   | 118 |
| Ergen HA et al.(124)       | 2004 | ME  | Ins/Del | T2DN | 25  | 21  | 29  | T2DM | 50  | 31   | 69  |
| Eroglu Z et al.(125)       | 2008 | ME  | Ins/Del | T2DN | 46  | 43  | 49  | T2DM | 56  | 50   | 62  |
| Felehgari V et al.(126)    | 2011 | ME  | Ins/Del | T2DN | 68  | 42  | 94  | T2DM | 72  | 60   | 84  |
| Sancakdar E et al.(127)    | 2015 | ME  | Ins/Del | T2DN | 194 | 180 | 208 | T2DM | 100 | 62   | 138 |

|                            |      |     |         |           |     |     |     |      |     |     |  |
|----------------------------|------|-----|---------|-----------|-----|-----|-----|------|-----|-----|--|
| Ahluwalia TS et al.(128)   | 2009 | SAS | Ins/Del | T2DN      | 240 | 152 | 328 | T2DM | 200 | 215 |  |
| Kumar R et al.(129)        | 2013 | SAS | Ins/Del | T2DN      | 407 | 448 | 366 | T2DM | 185 | 190 |  |
| Movva S et al.(130)        | 2007 | SAS | Ins/Del | T2DN      | 174 | 182 | 166 | T2DM | 175 | 222 |  |
| Naresh VV et al.(131)      | 2009 | SAS | Ins/Del | T2DN      | 30  | 19  | 41  | T2DM | 30  | 35  |  |
| Shaikh R et al.(132)       | 2012 | SAS | Ins/Del | T2DN      | 168 | 134 | 202 | T2DM | 296 | 394 |  |
| Vishwanathan V et al.(133) | 2001 | SAS | Ins/Del | T2DN      | 86  | 79  | 93  | T2DM | 23  | 28  |  |
| Doi Y et al.(134)          | 1996 | EAS | Ins/Del | T2DN-ESRD | 100 | 115 | 85  | T2DM | 124 | 168 |  |
| Jayapalan JJ et al.(135)   | 2010 | EAS | Ins/Del | T2DN-ESRD | 127 | 163 | 91  | T2DM | 81  | 93  |  |
| Lu M et al.(136)           | 2016 | EAS | Ins/Del | T2DN-ESRD | 210 | 238 | 182 | T2DM | 222 | 307 |  |
| Park HC et al.(137)        | 2005 | EAS | Ins/Del | T2DN-ESRD | 103 | 103 | 103 | T2DM | 88  | 111 |  |
| Taniwaki H et al.(138)     | 2001 | EAS | Ins/Del | T2DN-ESRD | 42  | 53  | 31  | T2DM | 69  | 88  |  |
| Grzeszczak W et al.(139)   | 1998 | EUR | Ins/Del | T2DN-ESRD | 127 | 128 | 126 | T2DM | 254 | 244 |  |
| Ringel J et al. *(100)     | 1997 | EUR | Ins/Del | T2DN-ESRD | 161 | 150 | 172 | T2DM | 140 | 141 |  |
| Schmidt S et al. (A)(140)  | 1997 | EUR | Ins/Del | T2DN-ESRD | 61  | 29  | 93  | T2DM | 347 | 416 |  |

\*Burg M et al., Pawlik M et al., and Ringel J et al., are included twice as these articles contained two phenotypic comparisons

Abbreviations: EAS, East Asian; EUR, European; ME, Middle Eastern; SAS, South Asian; CKD, Chronic Kidney Disease; ESRD, End-Stage Renal Disease; IgAN, IgA Nephropathy; GN, Glomerulonephritis; RTx, Renal Transplant; T1DM, Type 1 Diabetes Mellitus; T1DN, Type 1 Diabetic Nephropathy; T2DM, Type 2 Diabetes Mellitus; T2DN, Type 2 Diabetic Nephropathy.

Supplementary Table S5: Data included in quantitative analysis for AGT

| Author                     | Year | Ethnicity | SNP   | Definition | Cases |                    |                    | Controls   |     |                    |                    |
|----------------------------|------|-----------|-------|------------|-------|--------------------|--------------------|------------|-----|--------------------|--------------------|
|                            |      |           |       |            | N     | T Allele Frequency | C Allele Frequency | Definition | N   | T Allele Frequency | C Allele Frequency |
| Beige J et al. (141)       | 1996 | EUR       | rs699 | ESRD       | 269   | 285                | 253                | Healthy    | 269 | 307                | 229                |
| Buraczynska M et al.(64)   | 2006 | EUR       | rs699 | ESRD       | 745   | 734                | 756                | Healthy    | 520 | 564                | 476                |
| Losito A et al.(66)        | 2002 | EUR       | rs699 | ESRD       | 160   | 165                | 155                | Healthy    | 169 | 190                | 148                |
| Lovati E et al.(142)       | 2001 | EUR       | rs699 | ESRD       | 260   | 299                | 221                | Healthy    | 327 | 393                | 261                |
| Doria A et al.(143)        | 1996 | EUR       | rs699 | T1DN       | 139   | 158                | 120                | T1DM       | 75  | 96                 | 54                 |
| Fogarty DG et al.(144)     | 1996 | EUR       | rs699 | T1DN       | 95    | 114                | 76                 | T1DM       | 100 | 129                | 71                 |
| Möllsten A et al.(145)     | 2008 | EUR       | rs699 | T1DN       | 73    | 62                 | 34                 | T1DM       | 197 | 220                | 174                |
| Ringel J et al.(100)       | 1997 | EUR       | rs699 | T1DN       | 134   | 145                | 123                | T1DM       | 226 | 257                | 195                |
| Schmidt S et al.*(146)     | 1996 | EUR       | rs699 | T1DN       | 108   | 121                | 95                 | T1DM       | 120 | 132                | 108                |
| van Ittersum FJ et al.(53) | 2000 | EUR       | rs699 | T1DN       | 30    | 31                 | 29                 | T1DM       | 188 | 238                | 138                |
| Walder B et al.(104)       | 1998 | EUR       | rs699 | T1DN       | 55    | 60                 | 50                 | T1DM       | 44  | 63                 | 25                 |
| Ohno T et al.(110)         | 1996 | EAS       | rs699 | T2DN       | 25    | 16                 | 34                 | T2DM       | 53  | 25                 | 81                 |
| Oue T et al.(147)          | 1999 | EAS       | rs699 | T2DN       | 27    | 6                  | 36                 | T2DM       | 40  | 13                 | 47                 |
| Thomas GN et al.(112)      | 2001 | EAS       | rs699 | T2DN       | 51    | 18                 | 84                 | T2DM       | 255 | 79                 | 431                |
| Wang M et al.(113)         | 2016 | EAS       | rs699 | T2DN       | 189   | 19                 | 175                | T2DM       | 473 | 154                | 792                |
| Wu SH et al.(114)          | 2000 | EAS       | rs699 | T2DN       | 71    | 21                 | 121                | T2DM       | 41  | 26                 | 56                 |
| Young RP et al.(115)       | 1998 | EAS       | rs699 | T2DN       | 20    | 4                  | 36                 | T2DM       | 54  | 25                 | 83                 |
| Fradin S et al.(117)       | 2002 | EUR       | rs699 | T2DN       | 39    | 45                 | 33                 | T2DM       | 118 | 139                | 97                 |
| Freire MB et al.(148)      | 1998 | EUR       | rs699 | T2DN       | 117   | 134                | 96                 | T2DM       | 125 | 148                | 88                 |
| Schmidt S et al.*(146)     | 1996 | EUR       | rs699 | T2DN       | 127   | 149                | 105                | T2DM       | 107 | 117                | 97                 |
| Zychma MJ et al.(149)      | 2000 | EUR       | rs699 | T2DN       | 127   | 133                | 121                | T2DM       | 243 | 242                | 244                |
| Eroglu Z et al.(125)       | 2008 | ME        | rs699 | T2DN       | 46    | 48                 | 44                 | T2DM       | 56  | 62                 | 50                 |
| Reis KA et al.(150)        | 2011 | ME        | rs699 | T2DN       | 108   | 114                | 102                | T2DM       | 111 | 89                 | 133                |
| Sancakdar E et al.(127)    | 2015 | ME        | rs699 | T2DN       | 194   | 189                | 199                | T2DM       | 100 | 95                 | 105                |
| Gao J et al.(49)           | 2015 | EAS       | rs699 | IgAN       | 351   | 144                | 556                | Healthy    | 310 | 125                | 495                |
| Guo Y et al.(73)           | 2016 | EAS       | rs699 | IgAN       | 45    | 19                 | 71                 | Healthy    | 45  | 16                 | 74                 |

1  
2  
3  
4  
5  
6  
7  
8  
9  
10  
11  
12  
13  
14  
15  
16  
17  
18  
19  
20  
21  
22  
23  
24  
25  
26  
27  
28  
29  
30  
31  
32  
33  
34  
35  
36  
37  
38  
39  
40  
41  
42  
43  
44  
45  
46  
47

|                     |      |     |       |      |     |     |      |         |     |     |      |
|---------------------|------|-----|-------|------|-----|-----|------|---------|-----|-----|------|
| Huang HD et al.(50) | 2010 | EAS | rs699 | IgAN | 130 | 35  | 225  | Healthy | 120 | 40  | 200  |
| Kim SM et al.(51)   | 2009 | EAS | rs699 | IgAN | 238 | 89  | 387  | Healthy | 300 | 115 | 485  |
| Lau YK et al.(25)   | 2004 | EAS | rs699 | IgAN | 118 | 27  | 209  | Healthy | 94  | 31  | 157  |
| Kawada N et al.(22) | 1997 | EAS | rs699 | ESRD | 216 | 91  | 333  | Healthy | 208 | 64  | 340  |
| Su SL et al.(60)    | 2014 | EAS | rs699 | ESRD | 647 | 193 | 1101 | Healthy | 644 | 230 | 1058 |
| Wang AY et al.(62)  | 2003 | EAS | rs699 | ESRD | 246 | 76  | 416  | Healthy | 183 | 64  | 302  |

\*Schmidt S et al., is included twice as the article contained two phenotypic comparisons.

Abbreviations: EAS, East Asian; EUR, European; ME, Middle Eastern; ESRD, End-Stage Renal Disease; IgAN, IgA Nephropathy; T1DM, Type 1 Diabetes Mellitus; T1DN, Type 1 Diabetic Nephropathy; T2DM, Type 2 Diabetes Mellitus; T2DN, Type 2 Diabetic Nephropathy.

**Supplementary Table S6: Data included in quantitative analysis for *AGTR1***

| Author                     | Year | Ethnicity | SNP    | Cases      |     |                    |                    | Controls   |     |                    |                    |
|----------------------------|------|-----------|--------|------------|-----|--------------------|--------------------|------------|-----|--------------------|--------------------|
|                            |      |           |        | Definition | N   | A Allele Frequency | C Allele Frequency | Definition | N   | A Allele Frequency | C Allele Frequency |
| Gao J et al.(49)           | 2015 | EAS       | rs5186 | IgAN       | 351 | 659                | 43                 | Healthy    | 310 | 577                | 43                 |
| Huang HD et al.(50)        | 2010 | EAS       | rs5186 | IgAN       | 130 | 243                | 17                 | Healthy    | 120 | 220                | 20                 |
| Kim SM et al.(51)          | 2009 | EAS       | rs5186 | IgAN       | 238 | 452                | 24                 | Healthy    | 300 | 576                | 24                 |
| Lau YK et al.(25)          | 2004 | EAS       | rs5186 | IgAN       | 118 | 227                | 9                  | Healthy    | 94  | 178                | 10                 |
| Currie D et al.(95)        | 2010 | EUR       | rs5186 | T1DN       | 718 | 1029               | 385                | T1DM       | 749 | 1052               | 418                |
| Doria A et al.(151)        | 1997 | EUR       | rs5186 | T1DN       | 73  | 99                 | 47                 | T1DM       | 79  | 119                | 39                 |
| Möllsten A et al.(145)     | 2008 | EUR       | rs5186 | T1DN       | 72  | 78                 | 18                 | T1DM       | 197 | 290                | 104                |
| Savage DA et al.(52)       | 1999 | EUR       | rs5186 | T1DN       | 95  | 136                | 54                 | T1DM       | 97  | 137                | 57                 |
| Tarnow L et al.(152)       | 1996 | EUR       | rs5186 | T1DN       | 198 | 287                | 109                | T1DM       | 190 | 274                | 106                |
| van Ittersum FJ et al.(53) | 2000 | EUR       | rs5186 | T1DN       | 30  | 47                 | 13                 | T1DM       | 188 | 238                | 138                |
| Thomas GN et al.(112)      | 2001 | EAS       | rs5186 | T2DN       | 51  | 99                 | 3                  | T2DM       | 255 | 483                | 27                 |
| Wu SH et al.(114)          | 2000 | EAS       | rs5186 | T2DN       | 71  | 127                | 15                 | T2DM       | 41  | 74                 | 8                  |
| Young RP et al.(115)       | 1998 | EAS       | rs5186 | T2DN       | 20  | 38                 | 2                  | T2DM       | 54  | 103                | 5                  |
| Ahluwalia TS et al.(128)   | 2009 | SAS       | rs5186 | T2DN       | 240 | 320                | 160                | T2DM       | 255 | 381                | 129                |
| Prasad P et al.(54)        | 2006 | SAS       | rs5186 | T2DN       | 196 | 360                | 26                 | T2DM       | 225 | 417                | 33                 |
| Shah VN et al.(153)        | 2013 | SAS       | rs5186 | T2DN       | 596 | 789                | 403                | T2DM       | 566 | 840                | 282                |

Abbreviations: EAS, East Asian; EUR, European; SAS, South Asian; IgAN, IgA Nephropathy; T1DM, Type 1 Diabetes Mellitus; T1DN, Type 1 Diabetic Nephropathy; T2DM, Type 2 Diabetes Mellitus; T2DN, Type 2 Diabetic Nephropathy.

Supplementary Table S7. Included studies not complying with Hardy Weinberg equilibrium in cases or controls

| Gene        | Author           | Year | Ethnicity | SNP       | Cases      |                             | Controls   |                             |
|-------------|------------------|------|-----------|-----------|------------|-----------------------------|------------|-----------------------------|
|             |                  |      |           |           | Definition | P value (where significant) | Definition | P value (where significant) |
| ACE         | Jung ES          | 2010 | EAS       | Ins/Del   | IgAN       |                             | Healthy    | 0.016                       |
|             | Shanmuganathan R | 2015 | SAS       | Ins/Del   | CKD        | 1.31x10 <sup>-04</sup>      | Healthy    | 1.9x10 <sup>-05</sup>       |
|             | Tang FY          | 2008 | EAS       | Ins/Del   | ESRD       | 1.8x10 <sup>-05</sup>       | Healthy    | 1x10 <sup>-06</sup>         |
|             | Nicod J          | 2002 | EUR       | Ins/Del   | ESRD       | 0.0008                      | Healthy    | 0.004                       |
|             | McLaughlin KJ    | 1996 | EUR       | Ins/Del   | ESRD       | 0.04                        | Healthy    |                             |
|             | Yorioka T        | 1995 | EAS       | Ins/Del   | IgAN       | 0.013                       | Healthy    |                             |
|             | Yoshida H        | 1995 | EAS       | Ins/Del   | IgAN       | 0.01                        | Healthy    |                             |
|             | Yoon HJ          | 2002 | EAS       | Ins/Del   | IgAN       | 0.002                       | Healthy    |                             |
|             | Schmidt S        | 1995 | EUR       | Ins/Del   | IgAN       | 0.007                       | Healthy    |                             |
|             | Suzuki H         | 2004 | EAS       | Ins/Del   | IgAN       | 0.036                       | Healthy    | 0.004                       |
|             | Zsom M           | 2011 | EUR       | Ins/Del   | Primary GN | 0.005                       | Healthy    |                             |
|             | Currie D         | 2010 | EUR       | Ins/Del   | T1DN       |                             | T1DM       | 0.005                       |
|             | Ringel J         | 1997 | EUR       | Ins/Del   | T1DN       |                             | T1DM       | 0.018                       |
|             | Tarnow L         | 1995 | EUR       | Ins/Del   | T1DN       |                             | T1DM       | 0.013                       |
|             | Schmidt S        | 1995 | EUR       | Ins/Del   | T1DN       | 0.002                       | T1DM       |                             |
|             | Mizuiri S        | 1995 | EAS       | Ins/Del   | T2DN       | 0.019                       | T2DM       |                             |
|             | Hsieh MC         | 2000 | EAS       | Ins/Del   | T2DN       | 4.2x10 <sup>-05</sup>       | T2DM       | 0.004                       |
|             | Ha SK            | 2003 | EAS       | Ins/Del   | T2DN       |                             | T2DM       | 0.026                       |
|             | Schmidt S        | 1997 | EUR       | Ins/Del   | T2DN       | 0.0147                      | T2DM       |                             |
|             | El-Baz R         | 2012 | ME        | Ins/Del   | T2DN       | 0.0025                      | T2DM       | 1x10 <sup>-06</sup>         |
| Sancakdar E | 2015             | ME   | Ins/Del   | T2DN      | 0.0076     | T2DM                        | 0.003      |                             |
| Kumar R     | 2013             | SAS  | Ins/Del   | T2DN      | 0.0016     | T2DM                        | 0.0003     |                             |
| Park HC     | 2005             | EAS  | Ins/Del   | T2DN-ESRD |            | T2DM                        | 0.022      |                             |
| AGT         | Fogarty DG       | 1996 | EUR       | rs699     | T1DN       |                             | T1DM       | 0.044                       |
|             | Wu SH            | 2000 | EAS       | rs699     | T2DN       | 0.0008                      | T2DM       |                             |
|             | Freire MB        | 1998 | EUR       | rs699     | T2DN       | 0.022                       | T2DM       |                             |
|             | Reis KA          | 2011 | ME        | rs699     | T2DN       | 0.006                       | T2DM       |                             |

|       |              |      |     |        |      |       |         |                       |
|-------|--------------|------|-----|--------|------|-------|---------|-----------------------|
|       | Fradin S     | 2002 | EUR | rs699  | T2DN | 0.008 | T2DM    |                       |
| AGTR1 | Ahluwalia TS | 2009 | SAS | rs5186 | T2DN |       | T2DM    | 0.0002                |
|       | Shah VN      | 2013 | SAS | rs5186 | T2DN |       | T2DM    | $4.2 \times 10^{-08}$ |
|       | Lau YK       | 2004 | EAS | rs5186 | IgAN | 0.038 | Healthy |                       |
|       | Möllsten A   | 2008 | EUR | rs5186 | T1DN | 0.029 | T1DM    |                       |

Abbreviations: EAS, East Asian; EUR, European; ME, Middle Eastern; SAS, South Asian; CKD, Chronic Kidney Disease; ESRD, End-Stage Renal Disease; GN, Glomerulonephritis; IgAN, IgA Nephropathy; T1DM, Type 1 Diabetes Mellitus; T1DN, Type 1 Diabetic Nephropathy; T2DM, Type 2 Diabetes Mellitus; T2DN, Type 2 Diabetic Nephropathy.



## Supplementary Table S3a

| Exclusion S Title     | Authors         | PMID     | Reason                   |
|-----------------------|-----------------|----------|--------------------------|
| 1 Angiotensin I - C   | Cambien, F      | 9519756  | No data for ACE          |
| 1 Association of TI   | Sener EF, T     | 24126814 | No data for ACE          |
| 1 Clinical utility of | Elmonem N       | 25407738 | No data for ACE          |
| 1 DDOST, PRKCSH       | Hoverfelt A     | 20490454 | No data for ACE          |
| 1 Effect of a polyn   | Morita T, It    | 10543322 | No data for ACE          |
| 1 Effects of erythr   | Glicklich D,    | 10428268 | No data for ACE          |
| 1 Impact of the pr    | Lely AT, var    | 18077786 | No data for ACE          |
| 1 Kinin-dependen      | Molinaro G      | 17003818 | No data for ACE          |
| 1 Manganese sup       | Lee SJ, Cho     | 16324912 | No data for ACE          |
| 1 Nephropathy in      | Orchard TJ,     | 12164879 | No data for ACE          |
| 1 Neuropeptide Y      | Ito, H; Mor     | 10363627 | No data for ACE          |
| 1 Polymorphisms       | Frojdo, S; S    | 16211375 | No data for ACE          |
| 1 Role of glycaemi    | Powrie JK, '    | 7819935  | No data for ACE          |
| 1 Connexin 43 is n    | Gerl, M; Ku     | 24062052 | Non-human                |
| 1 Kallikrein and ar   | Catanzaro C     | 6186886  | Non-human                |
| 1 Multi-species co    | Hamilton N      | 23408978 | Non-human                |
| 1 N-domain angio      | Bueno, V; F     | 15194348 | Non-human                |
| 1 Renal angiotens     | Stoneking,      | 9719278  | Non-human                |
| 1 Altered activitie   | Sharma, JN      | 25964383 | Not a case-control study |
| 1 Angiotensin con     | Yildiz A, Ya    | 12832741 | Not a case-control study |
| 1 Angiotensin-con     | So WY, Ma       | 16395257 | Not a case-control study |
| 1 Angiotensin-con     | AkÅşay A, C     | 15013293 | Not a case-control study |
| 1 Angiotensin-con     | Woo KT, La      | 18536822 | Not a case-control study |
| 1 Angiotensin-con     | Beige J, Off    | 9550656  | Not a case-control study |
| 1 Angiotensin-I co    | Ng, D; Tai, l   | 15830182 | Not a case-control study |
| 1 Antihypertensiv     | Kuznetsova      | 10918550 | Not a case-control study |
| 1 Antiproteinuric     | Haneda M,       | 15364166 | Not a case-control study |
| 1 Association betw    | Huang, ZK;      | 26000752 | Not a case-control study |
| 1 Association betw    | van Essen C     | 8538349  | Not a case-control study |
| 1 Association of t    | Akçay A, Se     | 15385810 | Not a case-control study |
| 1 Captopril enhan     | Di Paolo S,     | 12499886 | Not a case-control study |
| 1 Contribution of     | Wong TY, S      | 11431175 | Not a case-control study |
| 1 Correlates of AC    | Nikzamir A,     | 17986476 | Not a case-control study |
| 1 Deletion inserti    | BjÅrck S, l     | 9269704  | Not a case-control study |
| 1 Disease progres     | Woo KT, La      | 17601378 | Not a case-control study |
| 1 Effect of deletio   | Parving HH      | 8806248  | Not a case-control study |
| 1 Gene polymorpi      | Zhang G, W      | 17984617 | Not a case-control study |
| 1 Genetics and th     | Marre, M        | 10097900 | Not a case-control study |
| 1 Genetics of angi    | Costerouss      | 9247746  | Not a case-control study |
| 1 Hereditary facto    | Marre, M; l     | 10922971 | Not a case-control study |
| 1 Impact of geneti    | Siekierka-H     | 19681973 | Not a case-control study |
| 1 Insertion/deleti    | Osono E, Ki     | 9820440  | Not a case-control study |
| 1 Insertion/deleti    | Fedor R, As     | 21620105 | Not a case-control study |
| 1 Is the presence     | Ng, DPK; T      | 18523141 | Not a case-control study |
| 1 Is there a role     | of Isbir CS, Ak | 11525534 | Not a case-control study |
| 1 M235T angioten      | Staessen, J,    | 10100088 | Not a case-control study |
| 1 Microfluidic chip   | Sohni YR, B     | 12554058 | Not a case-control study |
| 1 Mistyping of the    | Ueda, S; He     | 8863184  | Not a case-control study |

1 PAI-1 4G/5G anc Aucella F, N 12748347 Not a case-control study  
 1 Risk factors for t Oue, T; Nar 10580616 Not a case-control study  
 1 Survival in type : PadrÃ³-Mic 19014923 Not a case-control study  
 1 The effect of an Nakayama 16312263 Not a case-control study  
 1 A novel human l Barash U, C 20007507 Not a renal disease focus  
 1 A study on the a Chmaisse F 19861867 Not a renal disease focus  
 1 Abnormal hepat Drenth JP, 15057895 Not a renal disease focus  
 1 ACE and PC-1 ge de Azevedo 12126783 Not a renal disease focus  
 1 ACE gene inserti Dell'omo, C 16889537 Not a renal disease focus  
 1 Albuminuria anc Thomas GN 11200871 Not a renal disease focus  
 1 alpha-adducin a Clark, CJ; D 11116113 Not a renal disease focus  
 1 Angiotensin con Nagi DK, M 8582133 Not a renal disease focus  
 1 Angiotensin con Miller JA, S 8995725 Not a renal disease focus  
 1 Angiotensin l co Tassiulas, K 9710341 Not a renal disease focus  
 1 Angiotensin l-co Costerouss 9830503 Not a renal disease focus  
 1 Angiotensin l-co Vasku, A; S 9607178 Not a renal disease focus  
 1 Angiotensin-con Mansoor Q 22607040 Not a renal disease focus  
 1 Angiotensin-con Negi VS, De 25957879 Not a renal disease focus  
 1 Angiotensin-con Catarsi P, R 16002416 Not a renal disease focus  
 1 Angiotensin-con Douglas G, 15338496 Not a renal disease focus  
 1 Angiotensin-con Pedersen-E 19820429 Not a renal disease focus  
 1 Angiotensin-con Stefansson 10855732 Not a renal disease focus  
 1 Angiotensin-con Singh M, Si 27030424 Not a renal disease focus  
 1 Angiotensin-con Uhm WS, L 12043886 Not a renal disease focus  
 1 Angiotensin-Cor Lachurie, M 7796503 Not a renal disease focus  
 1 Angiotensin-con Al-Awadhi , 17631741 Not a renal disease focus  
 1 Angiotensin-con Prkacin I, N 11505631 Not a renal disease focus  
 1 Are the angioter Dikmen M, 16791358 Not a renal disease focus  
 1 Association betv Boomsma f 15830186 Not a renal disease focus  
 1 Association of A Bahramali l 26861937 Not a renal disease focus  
 1 Association of A Alsafar H, F 26491214 Not a renal disease focus  
 1 Association of al Rabbani M. 18711292 Not a renal disease focus  
 1 Association of al Nikzamir A, 18154415 Not a renal disease focus  
 1 Association of al RodrÃ³-gue; 11345362 Not a renal disease focus  
 1 Association of A Singh, PP; f 16621107 Not a renal disease focus  
 1 Association of B Moholisa R 23730990 Not a renal disease focus  
 1 Association of cl Elmonem N 26589000 Not a renal disease focus  
 1 Association of cl Kitamura, f 9951811 Not a renal disease focus  
 1 Association of p Meng, N; Z 25359286 Not a renal disease focus  
 1 Association of re Conen D, G 18698212 Not a renal disease focus  
 1 Association of tl Mayer, NJ; 11836444 Not a renal disease focus  
 1 Carotid intima-n NergizoÃ¶l 10493570 Not a renal disease focus  
 1 CCL18: a urinary Boot RG, V 16736095 Not a renal disease focus  
 1 COL4A1 mutatic Weng, YC; ! 22522439 Not a renal disease focus  
 1 Comprehensive Kato, N; Su 10953993 Not a renal disease focus  
 1 Contribution of : Mondorf U 9524045 Not a renal disease focus  
 1 Deletion polymc Gharavi AG 8677872 Not a renal disease focus  
 1 Detection of the Matsumotc 11106834 Not a renal disease focus  
 1 Different impact Olivieri O, C 11791024 Not a renal disease focus  
 1 Distribution of d Diamantop 10821349 Not a renal disease focus

|    |                                                                     |
|----|---------------------------------------------------------------------|
| 1  |                                                                     |
| 2  | 1 Distribution of h Hussain N, 23448612 Not a renal disease focus   |
| 3  | 1 Effects of angiot Kulah E, Du 17625392 Not a renal disease focus  |
| 4  | 1 Efficacy of Korez Kwon, DH; 23717118 Not a renal disease focus    |
| 5  | 1 Elevated urinary Clausen, P; 10872702 Not a renal disease focus   |
| 6  | 1 Frequencies Of \Zee, Ryl; Be 7882587 Not a renal disease focus    |
| 7  | 1 Genetic polymoi Deuster, P/ 23543093 Not a renal disease focus    |
| 8  | 1 Genetic polymoi Olivieri O, T 10567188 Not a renal disease focus  |
| 9  | 1 Genetic risk for i Missouri C 8821841 Not a renal disease focus   |
| 10 | 1 Genetic risk of a van Onna N 15326089 Not a renal disease focus   |
| 11 | 1 Genetic variants Szperl M, D 19043368 Not a renal disease focus   |
| 12 | 1 Hepatocystin is i Overton JD 26671672 Not a renal disease focus   |
| 13 | 1 Impact of mater Pfab T, Stir 17563539 Not a renal disease focus   |
| 14 | 1 Increased amou Suehiro T, I 15164285 Not a renal disease focus    |
| 15 | 1 Increased D allel Morrison C 11381371 Not a renal disease focus   |
| 16 | 1 Increased expre Yamani Mf 17097490 Not a renal disease focus      |
| 17 | 1 Increased frequ Onizuka M, 16044138 Not a renal disease focus     |
| 18 | 1 Independent, M Morris, Bj; 8104754 Not a renal disease focus      |
| 19 | 1 Inhibition of tiss Montgome 9797175 Not a renal disease focus     |
| 20 | 1 Insertion/Deleti de Martino 21477733 Not a renal disease focus    |
| 21 | 1 Late-onset acid i Mehler M, 9923 Not a renal disease focus        |
| 22 | 1 Leukocyte beta- Raghavan S 6770675 Not a renal disease focus      |
| 23 | 1 Lys(173)Arg and Komiya I, Y 10720581 Not a renal disease focus    |
| 24 | 1 Mutations in PR Li A, Davila 12529853 Not a renal disease focus   |
| 25 | 1 No association t Yildiz A, Ak 10657713 Not a renal disease focus  |
| 26 | 1 Peripheral vascu Thomas GN 14632699 Not a renal disease focus     |
| 27 | 1 Pharmacogeneti Okamura A 10535720 Not a renal disease focus       |
| 28 | 1 Polymorphisms Deckers IA, 24978482 Not a renal disease focus      |
| 29 | 1 Relationship of l Fu Y, Katsu 15894833 Not a renal disease focus  |
| 30 | 1 Relationship of e Heltianu C, 15784171 Not a renal disease focus  |
| 31 | 1 Relationship of t Huang XH, 9544854 Not a renal disease focus     |
| 32 | 1 Renal ACE immu Mizuiri S, Y 9469501 Not a renal disease focus     |
| 33 | 1 Renal changes o Marre, M; l 10082486 Not a renal disease focus    |
| 34 | 1 Renal outcome i Molad Y, G 11071585 Not a renal disease focus     |
| 35 | 1 Renin-angiotens BuraczyÅ,,s 14502296 Not a renal disease focus    |
| 36 | 1 Renovascular di: Pizzolo F, N 14718831 Not a renal disease focus  |
| 37 | 1 Synergistic effec Barlassina e 10720960 Not a renal disease focus |
| 38 | 1 Testing of poten Schoenfeld 24667567 Not a renal disease focus    |
| 39 | 1 The angiotensin Ebert, MPA 16365022 Not a renal disease focus     |
| 40 | 1 The Captopril Pr Hansson L, 9495662 Not a renal disease focus     |
| 41 | 1 The presence of GÄ¼ngÄ¼r 21332339 Not a renal disease focus       |
| 42 | 1 [A study on angi Nishina M. 9014479 Not English or Spanish        |
| 43 | 1 [Angiotensin-coi Krajina-Anc 23120809 Not English or Spanish      |
| 44 | 1 [Angiotensin-coi Guan T, Liu 10436947 Not English or Spanish      |
| 45 | 1 [Arterial hyperte Öko A, Åoc 14974362 Not English or Spanish      |
| 46 | 1 [Association bet Wang L, Pa 10923445 Not English or Spanish       |
| 47 | 1 [Association bet Qiu MY, Xie 25815490 Not English or Spanish      |
| 48 | 1 [Association bet Miloserdov 11234416 Not English or Spanish       |
| 49 | 1 [Association of e Lu LH, Cher 18393230 Not English or Spanish     |
| 50 | 1 [Association of t Kamysheva 15532370 Not English or Spanish       |
| 51 | 1 [Association of t BuraczyÅ,,s 12476891 Not English or Spanish     |
| 52 |                                                                     |
| 53 |                                                                     |
| 54 |                                                                     |
| 55 |                                                                     |
| 56 |                                                                     |
| 57 |                                                                     |
| 58 |                                                                     |
| 59 |                                                                     |
| 60 |                                                                     |

1 [Correlative stud Wu XX, Zhe 15698501 Not English or Spanish  
 1 [Genetic predisç Bzoma B, D 19112833 Not English or Spanish  
 1 [I/D relationship Kaliev RR, E 16078593 Not English or Spanish  
 1 [Is PstI polymorç Grzeszczak 9499204 Not English or Spanish  
 1 [Polymorphism : Kutyrina IV 10420452 Not English or Spanish  
 1 [Relationship be Wu S, Xianç 9596955 Not English or Spanish  
 1 [Relationship be Moleda P, I 17941464 Not English or Spanish  
 1 [Relationship be Liao L, Lei N 12016801 Not English or Spanish  
 1 [Renin-angioten BuraczyÅ,,s 11865575 Not English or Spanish  
 1 [Study on candic Lu J, Li LM, 12848919 Not English or Spanish  
 1 ACE and AT1 rec Kostic, M; S 15179569 Paediatric individuals  
 1 ACE gene inserti Sekerli E, K 19603195 Paediatric individuals  
 1 ACE gene inserti Serdaroglu 16208534 Paediatric individuals  
 1 ACE gene polym Haszon I, Fi 12478352 Paediatric individuals  
 1 ACE gene polym Tanaka R, li 9590186 Paediatric individuals  
 1 ACE gene polym Sasongko T 16421456 Paediatric individuals  
 1 ACE gene polym Fahmy ME, 18792483 Paediatric individuals  
 1 ACE gene polym Celik US, N 16825089 Paediatric individuals  
 1 ACE I/D gene po Oktem F, Si 14986085 Paediatric individuals  
 1 ACE I/D gene po Hohenfelln 10452281 Paediatric individuals  
 1 Angiotensin con Al-Eisa A, H 11487079 Paediatric individuals  
 1 Angiotensin con Bajpai M, P 14713838 Paediatric individuals  
 1 Angiotensin con Patil SJ, Gu 16272677 Paediatric individuals  
 1 Angiotensin I co Pavlovic, M 9950302 Paediatric individuals  
 1 Angiotensin I-co Pavlovic, M 9354852 Paediatric individuals  
 1 Angiotensin-con Rigoli, L; Cf 15470205 Paediatric individuals  
 1 Angiotensin-con al-Eisa A, H 10986863 Paediatric individuals  
 1 Angiotensin-con Zhou J, Tiar 15315169 Paediatric individuals  
 1 Angiotensin-con Tsai IJ, Yanç 16645262 Paediatric individuals  
 1 Angiotensin-con BatiniÅ† D, 25997642 Paediatric individuals  
 1 Angiotensinoger Gallego, P† 18413222 Paediatric individuals  
 1 Association of A Dhandapar 26154535 Paediatric individuals  
 1 Association of ai Laksmi NK, 20149750 Paediatric individuals  
 1 Association of tl Shahid S, A 22033511 Paediatric individuals  
 1 DD genotype of Alasehirli B 22017506 Paediatric individuals  
 1 Effect of angioe Saber-Ayac 20418353 Paediatric individuals  
 1 Gene polymorpl Kaplan Å°, : 25262176 Paediatric individuals  
 1 Genetic polymoi Frishberg Y 9853248 Paediatric individuals  
 1 Glycosphingolipi Dawson G. 5016302 Paediatric individuals  
 1 HPSE2 mutation Bulum B, Å 25924634 Paediatric individuals  
 1 Impact of ACE I/ Hohenfelln 11354781 Paediatric individuals  
 1 Impact of comm Hussein A, 25939993 Paediatric individuals  
 1 Implication of gr Hahn H, Ku 16133060 Paediatric individuals  
 1 Implications of c Ozen S, Ali† 10401028 Paediatric individuals  
 1 Is ACE gene poly ErdoÅŸyan † 15138870 Paediatric individuals  
 1 Late effects on r BÅŸirdi E, Ol 15390293 Paediatric individuals  
 1 Low renin-angio Peruzzi L, L 16006956 Paediatric individuals  
 1 Modification of Rangel M, c 25170764 Paediatric individuals  
 1 Polymorphisms Amoroso A 9870486 Paediatric individuals  
 1 Polymorphisms Maruyama 11354780 Paediatric individuals

|    |                                                                                                                                      |
|----|--------------------------------------------------------------------------------------------------------------------------------------|
| 1  |                                                                                                                                      |
| 2  | 1 Polymorphisms Ece A, Teke 16109085 Paediatric individuals                                                                          |
| 3  | 1 Polymorphisms Savvidou A 20022049 Paediatric individuals                                                                           |
| 4  | 1 Renin-angiotensin Papp F, Frie 12579405 Paediatric individuals                                                                     |
| 5  | 1 Renin-angiotensin Ozkaya, O; 16521052 Paediatric individuals                                                                       |
| 6  | 1 Renin-angiotensin Pardo R, M 12579398 Paediatric individuals                                                                       |
| 7  | 1 Renin-angiotensin Liu KP, Lin C 15045574 Paediatric individuals                                                                    |
| 8  | 1 Role of platelet- Tanaka R, li 10430976 Paediatric individuals                                                                     |
| 9  | 1 Significance of A Hori C, Hira 11474225 Paediatric individuals                                                                     |
| 10 | 1 High serum enalapril Elung-Jensen 11881130 Pharmaceutical drug focus                                                               |
| 11 | 1 ACE gene polymorphism Parving, HF 18199798 Pharmaceutical drug focus                                                               |
| 12 | 1 Chronic proteinuria Ruggenti 10616844 Pharmaceutical drug focus                                                                    |
| 13 | 1 Effect of angiotensin Penno G, C 9726242 Pharmaceutical drug focus                                                                 |
| 14 | 1 Enalapril and losartan Rashtchizadeh 17222813 Pharmaceutical drug focus                                                            |
| 15 | 1 Long-term renin-angiotensin Andersen S 12716812 Pharmaceutical drug focus                                                          |
| 16 | 1 Randomized placebo Kvetny J, G 11181984 Pharmaceutical drug focus                                                                  |
| 17 | 1 Renin-angiotensin Noroozian 17524880 Pharmaceutical drug focus                                                                     |
| 18 | 1 The influence of angiotensin Luik PT, Ho 12856080 Pharmaceutical drug focus                                                        |
| 20 | 2 Influence of angiotensin-converting enzyme gene polymorphism Parchwani 26214998 Incorrect patient group                            |
| 21 | 2 Polymorphism of angiotensin-converting enzyme gene Woo, KT; Lee 15504143 Overlap in patient group                                  |
| 22 | 2 Polymorphism of angiotensin-converting enzyme gene Frimat, L; P 11053482 Incorrect patient group                                   |
| 23 | 2 Interaction of angiotensin-converting enzyme gene polymorphism Rahimi Z, H 21942443 Incorrect patient group                        |
| 24 | 2 The frequency of angiotensin-converting enzyme gene polymorphism Rahimi Z, F 20853144 Incorrect patient group                      |
| 25 | 2 Polymorphism of angiotensin-converting enzyme gene Hanyu, O; Fan 9509566 Incorrect patient group                                   |
| 26 | 2 Angiotensin-converting enzyme gene polymorphism Gutierrez, C 9258285 No data                                                       |
| 27 | 2 The angiotensin-converting enzyme gene polymorphism Hibberd, M 9025006 Incorrect patient group                                     |
| 28 | 2 Genetic predisposition to angiotensin-converting enzyme gene polymorphism Doria, A; W 7909524 Incorrect patient group              |
| 29 | 2 Prognostic value of angiotensin-converting enzyme gene polymorphism Hadjadj S, F 18523145 No data                                  |
| 30 | 2 Association between angiotensin-converting enzyme gene polymorphism and hypertension Hadjadj S, T 17376814 No data                 |
| 31 | 2 Combinational effect of angiotensin-converting enzyme gene polymorphism Osawa N, K 17143591 No data                                |
| 32 | 2 Frequency of angiotensin-converting enzyme gene polymorphism in hypertension Degirmenci 16178979 No data                           |
| 33 | 2 Genetic variation of angiotensin-converting enzyme gene polymorphism Boright AP, 15793268 Incorrect patient group                  |
| 34 | 2 Effects of the angiotensin-converting enzyme gene polymorphism Luther Y, B 14610337 No data                                        |
| 35 | 2 ACE gene polymorphism and hypertension Lau YK, Wong 12119485 Overlap in patient group                                              |
| 36 | 2 Association of angiotensin-converting enzyme gene polymorphism and hypertension Gohda T, M 11770799 No data                        |
| 37 | 2 The DD genotype of angiotensin-converting enzyme gene polymorphism Azar ST, Zal 11428725 Incorrect patient group                   |
| 38 | 2 Genetic polymorphism of angiotensin-converting enzyme gene Lovati E, Ricci 11422735 No data                                        |
| 39 | 2 Association of angiotensin-converting enzyme gene polymorphism and hypertension Szelestei T, 10977777 No data                      |
| 40 | 2 Lack of synergism between angiotensin-converting enzyme gene polymorphism and hypertension Tarnow L, K 10907125 No data            |
| 41 | 2 The ACE insertion/deletion polymorphism van Dijk M, 10831637 Incorrect patient group                                               |
| 42 | 2 The renin-angiotensin system and hypertension Ong-Ajyoot 10511770 No data                                                          |
| 43 | 2 ACE, PAI-1, and angiotensin-converting enzyme gene polymorphism De Cosmo S 10495473 Incorrect patient group                        |
| 44 | 2 Effect of angiotensin-converting enzyme gene polymorphism on hypertension Kuramoto I 10023638 Incorrect patient group              |
| 45 | 2 Angiotensin-converting enzyme gene polymorphism and hypertension Jeffers BW, 9264004 No data                                       |
| 46 | 2 Hypertensive and angiotensin-converting enzyme gene polymorphism Kario K, Kario 9081678 Incorrect patient group                    |
| 47 | 2 Relationships between angiotensin-converting enzyme gene polymorphism and hypertension Oh TG, Shir 8854649 Incorrect patient group |
| 48 | 2 Genetic polymorphism of angiotensin-converting enzyme gene Buraczyńska 12898858 No data                                            |
| 49 | 3 [Angiotensin-converting enzyme gene polymorphism and hypertension] Ortega-Piñero 17570179 < 3 populations reported per SNP         |
| 50 | 3 Angiotensin-converting enzyme gene polymorphism and hypertension Fernández- 9607207 < 3 populations reported per SNP               |
| 51 | 3 Angiotensin-converting enzyme gene polymorphism and hypertension Abbas D et al 21976404 < 3 populations reported per SNP           |
| 52 | 3 Angiotensin-converting enzyme gene polymorphism and hypertension Lee DY et al 9434071 < 3 populations reported per SNP             |
| 53 |                                                                                                                                      |
| 54 |                                                                                                                                      |
| 55 |                                                                                                                                      |
| 56 |                                                                                                                                      |
| 57 |                                                                                                                                      |
| 58 |                                                                                                                                      |
| 59 |                                                                                                                                      |
| 60 |                                                                                                                                      |

1  
2 3 Angiotensin-I Cc Kumar A et al. < 3 populations reported per SNP  
3 3 Association betw Uemasu J e 9180368 < 3 populations reported per SNP  
4 3 Association betw Huo P et al. 25227524 < 3 populations reported per SNP  
5 3 Association of al Akai Y et al. 10099886 < 3 populations reported per SNP  
6 3 Association of tl Li X et al. 20540812 < 3 populations reported per SNP  
7 3 Chronic renal in: Prasad P et WOS:0002: < 3 populations reported per SNP  
8 3 Clinical impact o Amorim et 23362199 < 3 populations reported per SNP  
9 3 Contribution of ; Marre M et 9120002 < 3 populations reported per SNP  
10 3 DNA polymorph Freire MBS 9794558 < 3 populations reported per SNP  
11 3 Gene polymorph Su SL et al. 22147663 < 3 populations reported per SNP  
12 3 Genes involved i Litovkina O 24727057 < 3 populations reported per SNP  
13 3 Genetic Clues Tc Krcunovic z WOS:0002: < 3 populations reported per SNP  
14 3 Genetic polymoi Miura J et z 10499884 < 3 populations reported per SNP  
15 3 Genetic polymoi Fabris B et 15662219 < 3 populations reported per SNP  
16 3 Genetic risk fact Tripathi G e 18242170 < 3 populations reported per SNP  
17 3 Genetic variants Shaikh R et 24737640 < 3 populations reported per SNP  
18 3 Identification of Ezzidi I et a 19787680 < 3 populations reported per SNP  
19 3 Influence of ang Ramanatha 27748299 < 3 populations reported per SNP  
20 3 Influence of gen Parchwani 26214998 < 3 populations reported per SNP  
21 3 Influence of the Merta M et 12697976 < 3 populations reported per SNP  
22 3 Lack of associati Arfa I et al. 18404607 < 3 populations reported per SNP  
23 3 Polymorphism o Aucella F et 10773756 < 3 populations reported per SNP  
24 3 Polymorphism o Aayed K et a 16635753 < 3 populations reported per SNP  
25 3 Polymorphisms Sprovieri Sf 15934435 < 3 populations reported per SNP  
26 3 Renin-angiotens Parsa A et z 15789057 < 3 populations reported per SNP  
27 3 The DD genotyp Vleming LJ 10099885 < 3 populations reported per SNP  
28 3 The effect of pol Möllsten A 18413189 < 3 populations reported per SNP  
29 3 The presence of Canani LH e 16108844 < 3 populations reported per SNP  
30  
31  
32  
33  
34  
35  
36  
37  
38  
39  
40  
41  
42  
43  
44  
45  
46  
47  
48  
49  
50  
51  
52  
53  
54  
55  
56  
57  
58  
59  
60



## Supplementary Table S3b

| Exclusion S | Title               | Authors        | PMID     | Reason           |
|-------------|---------------------|----------------|----------|------------------|
| 1           | ACAC <sup>1</sup> 2 | gen Shah VN, C | 23081748 | No data for ACE2 |
| 1           | ACE gene ir         | Lee YJ, Tsai   | 12032106 | No data for ACE2 |
| 1           | ACE variant         | Ahluwalia T    | 19108684 | No data for ACE2 |
| 1           | [Angiotensi         | Ortega-Pier    | 17570179 | No data for ACE2 |
| 1           | [Clinical an        | Diez Ojea B    | 21113220 | No data for ACE2 |
| 1           | A disease h         | Ng DP, Plac    | 16936219 | No data for ACE2 |
| 1           | A functiona         | MÄ¶llsten      | 17192491 | No data for ACE2 |
| 1           | A HindIII p         | cOnaran M,     | 19616291 | No data for ACE2 |
| 1           | A Lack of Si        | Jannot AS,     | 26829596 | No data for ACE2 |
| 1           | A leucine r         | eFreedman I    | 17205963 | No data for ACE2 |
| 1           | A new poly          | Smolenicka     | 9589699  | No data for ACE2 |
| 1           | A novel me          | Chen Y, Bui    | 19162184 | No data for ACE2 |
| 1           | A polymor           | çBhandary L    | 21624462 | No data for ACE2 |
| 1           | A rare hapl         | Martin RJ, I   | 19783860 | No data for ACE2 |
| 1           | A risk allele       | Genovese C     | 20668430 | No data for ACE2 |
| 1           | A simultan          | ePapacostas    | 6688659  | No data for ACE2 |
| 1           | ACE gene p          | Lau YK, Wo     | 12119485 | No data for ACE2 |
| 1           | ACE gene p          | ViklickÄ½ C    | 11239522 | No data for ACE2 |
| 1           | ACE gene p          | Felehgari V    | 20830509 | No data for ACE2 |
| 1           | ACE genoty          | Stratta P, S   | 19034872 | No data for ACE2 |
| 1           | ACE, PAI-1,         | De Cosmo !     | 10495473 | No data for ACE2 |
| 1           | ADAMTS13            | Rurali E, Nc   | 23733198 | No data for ACE2 |
| 1           | African anc         | Behar DM,      | 20144966 | No data for ACE2 |
| 1           | Albuminuri          | Thomas GM      | 11200871 | No data for ACE2 |
| 1           | Aldosteron          | Lajer M, Sc    | 16759311 | No data for ACE2 |
| 1           | Aldosteron          | Yilmaz M, S    | 25957425 | No data for ACE2 |
| 1           | Allelic varia       | ePatente TA    | 25862415 | No data for ACE2 |
| 1           | An integrat         | Nanayakka      | 24351856 | No data for ACE2 |
| 1           | Analysis of         | Ali A, Vasu    | 21421653 | No data for ACE2 |
| 1           | Angiotensii         | FernÄ±nde      | 9607207  | No data for ACE2 |
| 1           | Angiotensii         | Yildiz A, Ya   | 12832741 | No data for ACE2 |
| 1           | Angiotensii         | Hueso M, A     | 15284309 | No data for ACE2 |
| 1           | Angiotensii         | Schmidt S,     | 9269698  | No data for ACE2 |
| 1           | Angiotensii         | Tassiulas IC   | 9710341  | No data for ACE2 |
| 1           | Angiotensii         | Grzeszczak     | 9727375  | No data for ACE2 |
| 1           | Angiotensii         | Stratta P, C   | 10352195 | No data for ACE2 |
| 1           | Angiotensii         | So WY, Ma      | 16395257 | No data for ACE2 |
| 1           | Angiotensii         | Abbas D, E     | 21976404 | No data for ACE2 |
| 1           | Angiotensii         | Douglas G,     | 15338496 | No data for ACE2 |
| 1           | Angiotensii         | Araz M, Yil    | 11640993 | No data for ACE2 |
| 1           | Angiotensii         | Uhm WS, L      | 12043886 | No data for ACE2 |
| 1           | Angiotensii         | Jeffers BW,    | 9264004  | No data for ACE2 |
| 1           | Angiotensii         | Lee DY, Kir    | 9434071  | No data for ACE2 |
| 1           | Angiotensii         | Al-Harbi EN    | 21207118 | No data for ACE2 |
| 1           | Angiotensii         | Beige J, Sch   | 9259361  | No data for ACE2 |
| 1           | Angiotensii         | AkÄ±ay A, C    | 15013293 | No data for ACE2 |
| 1           | Angiotensii         | Woo KT, La     | 18536822 | No data for ACE2 |
| 1           | Angiotensii         | Mizuiru S, H   | 7477652  | No data for ACE2 |

1  
2 1 Angiotensin II Ortiz MA, C 15012717 No data for ACE2  
3 1 Angiotensin II Schmidt A, 8785402 No data for ACE2  
4 1 Angiotensin II Beige J, Off 9550656 No data for ACE2  
5 1 Angiotensin II Arzu Ergen 15365253 No data for ACE2  
6 1 Angiotensin II Zychma MJ 11096141 No data for ACE2  
7 1 Anti-glutathione Aguilera I, 18308775 No data for ACE2  
8 1 APOL1 variant Papeta N, K 21997397 No data for ACE2  
9 1 Apolipoprotein Lipkowitz N 22832513 No data for ACE2  
10 1 Assessment Karsli Cepp 21859400 No data for ACE2  
11 1 Association Ohno T, Ka 8596493 No data for ACE2  
12 1 Association Prasad P, T 20353610 No data for ACE2  
13 1 Association Kavanagh E 21103979 No data for ACE2  
14 1 Association Wu LS, Hsie 19506043 No data for ACE2  
15 1 Association Doi Y, Yosh 8720609 No data for ACE2  
16 1 Association Melander C 11114699 No data for ACE2  
17 1 Association Uemasu J, I 9180368 No data for ACE2  
18 1 Association Hadjadj S, T 17376814 No data for ACE2  
19 1 Association van Essen C 8538349 No data for ACE2  
20 1 Association Li WL, Lu C. 26125729 No data for ACE2  
21 1 Association Ferrareso 21851254 No data for ACE2  
22 1 Association Huo P, Zhai 25227524 No data for ACE2  
23 1 Association Xiong H, Xie 19682085 No data for ACE2  
24 1 Association Vigo Gago I 15887856 No data for ACE2  
25 1 Association de Souza C 17914260 No data for ACE2  
26 1 Association Morris BJ, I 11907646 No data for ACE2  
27 1 Association Szelestey T, 10977777 No data for ACE2  
28 1 Association Pawlik M, M 23681285 No data for ACE2  
29 1 Association Tang FY, Liu 18629615 No data for ACE2  
30 1 Association Pei Y, Schol 9259580 No data for ACE2  
31 1 Association Cai Z, Chen 22720119 No data for ACE2  
32 1 Association Park HJ, Kir 24621205 No data for ACE2  
33 1 Association Siddarth M 23619522 No data for ACE2  
34 1 Association Nagase S, S 12701818 No data for ACE2  
35 1 Association BÄ¶lger CA, 21980298 No data for ACE2  
36 1 Association Bellini MH, 17498125 No data for ACE2  
37 1 Association Thaha M, P 18793530 No data for ACE2  
38 1 Association Ezzidi I, Mti 18413207 No data for ACE2  
39 1 Association Santos KG, 21255858 No data for ACE2  
40 1 Association Issac MS, A 24151105 No data for ACE2  
41 1 Association Yoshida T, I 19424605 No data for ACE2  
42 1 Association Yoshida T, I 19724895 No data for ACE2  
43 1 Association Vieira SM, I 21962117 No data for ACE2  
44 1 Association Yoshida T, I 19578796 No data for ACE2  
45 1 Association Yoshida T, I 19288030 No data for ACE2  
46 1 Association Yoshida T, I 19406964 No data for ACE2  
47 1 Association Datta SK, K 20954980 No data for ACE2  
48 1 Association Turki A, Ma 23727064 No data for ACE2  
49 1 Association Bostrom M 20466664 No data for ACE2  
50 1 Association Liu Y, Zhou 26841219 No data for ACE2  
51 1 Association Eroglu Z, C 18413162 No data for ACE2  
52  
53  
54  
55  
56  
57  
58  
59  
60



|    |                                                                   |
|----|-------------------------------------------------------------------|
| 1  |                                                                   |
| 2  | 1 Association Gohda T, M 11770799 No data for ACE2                |
| 3  | 1 Association Keene KL, M 18184924 No data for ACE2               |
| 4  | 1 Association Akcay A, Se 15385810 No data for ACE2               |
| 5  | 1 Association Neugebauer 10868974 No data for ACE2                |
| 6  | 1 Association Hodgkinson 14578247 No data for ACE2                |
| 7  | 1 Association Sener EF, T 24126814 No data for ACE2               |
| 8  | 1 Association Genovese C 20647424 No data for ACE2                |
| 9  | 1 Association Pazik J, OÅ, 22210424 No data for ACE2              |
| 10 | 1 Association Zhao YG, S 23044313 No data for ACE2                |
| 11 | 1 Association Lavery GG, 11916625 No data for ACE2                |
| 12 | 1 Association Kim SK, Par 24654912 No data for ACE2               |
| 13 | 1 Association Zhu AN, Ya 25867326 No data for ACE2                |
| 14 | 1 Balkan end Andonova I 15365959 No data for ACE2                 |
| 15 | 1 Base excision Cai Z, Guo 22780951 No data for ACE2              |
| 16 | 1 BsmI polymorphism Zhang H, W 22245613 No data for ACE2          |
| 17 | 1 Calpain 10 Demirci H, 18554168 No data for ACE2                 |
| 18 | 1 Cardiac hypertrophy Wang AY, C 12675870 No data for ACE2        |
| 19 | 1 Carnosine Janssen B, I 16046297 No data for ACE2                |
| 20 | 1 Catalase/superoxide dismutase Åzmen E 11440784 No data for ACE2 |
| 21 | 1 Characterization Munkert A, 18927121 No data for ACE2           |
| 22 | 1 Characterization Armstrong 23762448 No data for ACE2            |
| 23 | 1 Chronic pruritus Ruggenenti 10616844 No data for ACE2           |
| 24 | 1 Chronic renal Marra M, M 23129820 No data for ACE2              |
| 25 | 1 Circulating Anguiano, I 25813276 No data for ACE2               |
| 26 | 1 Circulating Caplin B, N 20010544 No data for ACE2               |
| 27 | 1 Clinical and Kim IW, M 22183771 No data for ACE2                |
| 28 | 1 Clinical importance Amorim CE 23362199 No data for ACE2         |
| 29 | 1 Clinical utility Elmonem M 25407738 No data for ACE2            |
| 30 | 1 Combinatorial Osawa N, K 17143591 No data for ACE2              |
| 31 | 1 Common variant Ahluwalia T 21573905 No data for ACE2            |
| 32 | 1 Contribution Wong TY, S 11431175 No data for ACE2               |
| 33 | 1 Copy Number Ruchi R, Ge 25933006 No data for ACE2               |
| 34 | 1 Correlates Nikzamir A, 17986476 No data for ACE2                |
| 35 | 1 CYP2C9 and MiroÅjevic 24024895 No data for ACE2                 |
| 36 | 1 CYP3A4 genotype Wang YY, Z 23217392 No data for ACE2            |
| 37 | 1 Cys327Cys KalousovÅi 24667032 No data for ACE2                  |
| 38 | 1 DDOST, PRIN Hoverfelt A 20490454 No data for ACE2               |
| 39 | 1 Deletion in BjÅrck S, I 9269704 No data for ACE2                |
| 40 | 1 Dense map Nelson GW 20124285 No data for ACE2                   |
| 41 | 1 Dereglate Denizot Y, 10978389 No data for ACE2                  |
| 42 | 1 Different in Olivieri O, C 11791024 No data for ACE2            |
| 43 | 1 Differential Freedman I 21698141 No data for ACE2               |
| 44 | 1 Differential Shankland I 10916090 No data for ACE2              |
| 45 | 1 Dinucleotide Maeda S, H 11576356 No data for ACE2               |
| 46 | 1 Disease pruritus Woo KT, La 17601378 No data for ACE2           |
| 47 | 1 Distribution Thaha M, Y 23770786 No data for ACE2               |
| 48 | 1 DNA polymorphism Freire MB, 9794558 No data for ACE2            |
| 49 | 1 DNA repair Radwan W 25310768 No data for ACE2                   |
| 50 | 1 Donor age De Meyer I 22835948 No data for ACE2                  |
| 51 | 1 Donor DNA Rutkowska 18290564 No data for ACE2                   |
| 52 |                                                                   |
| 53 |                                                                   |
| 54 |                                                                   |
| 55 |                                                                   |
| 56 |                                                                   |
| 57 |                                                                   |
| 58 |                                                                   |
| 59 |                                                                   |
| 60 |                                                                   |

1 Effect of a | Morita T, It 10543322 No data for ACE2  
 1 Effect of AC Kuramoto I 10023638 No data for ACE2  
 1 Effect of he Baum L, Ng 15983323 No data for ACE2  
 1 Effect of hu Tarng DC, T 11675410 No data for ACE2  
 1 Effects of tl Luther Y, Bi 14610337 No data for ACE2  
 1 Efficient sci Zhang LR, S 16952345 No data for ACE2  
 1 Elevated M Kaunisto M 19366862 No data for ACE2  
 1 Elevated pl Dieplinger | 8432847 No data for ACE2  
 1 Elevation o Korponay-S 14570724 No data for ACE2  
 1 Endothelial Marson BP, 20849252 No data for ACE2  
 1 Endothelial Yilmaz E, M 20005399 No data for ACE2  
 1 Endothelial ReiterovĀĵ 12077489 No data for ACE2  
 1 Endothelial Shimizu T, ( 12413777 No data for ACE2  
 1 Endothelial Ahluwalia T 18401556 No data for ACE2  
 1 Endothelial Buraczynsk 15299097 No data for ACE2  
 1 Endothelial de Prado A 12402580 No data for ACE2  
 1 Endothelial Wang Y, Kil 10570094 No data for ACE2  
 1 Endothelial Shoukry A, 22313046 No data for ACE2  
 1 Endothelial Asakimori \ 11549906 No data for ACE2  
 1 Endothelial Bhandary L 18331440 No data for ACE2  
 1 Endothelial Kerkeni M, 19376104 No data for ACE2  
 1 eNOS 4a/b Rahimi Z, R 23594559 No data for ACE2  
 1 Epidermal ğ Magistroni 12653106 No data for ACE2  
 1 Estimated ğ Otero Gonz 26152646 No data for ACE2  
 1 Estrogen re Cho NH, Sh 15189505 No data for ACE2  
 1 Evaluation Palmer ND, 24551085 No data for ACE2  
 1 Evaluation Hirakawa S 12830465 No data for ACE2  
 1 Evaluation Barnas U, S 9084972 No data for ACE2  
 1 Evidence fc Lamnissou 15727257 No data for ACE2  
 1 Exclusion o Wanic K, Pl 18753673 No data for ACE2  
 1 Exome seq Sanna-Cher 21697813 No data for ACE2  
 1 Expression Metalidis C 21544031 No data for ACE2  
 1 Factor B su Nishimukai 3272818 No data for ACE2  
 1 Frequency Degirmenci 16178979 No data for ACE2  
 1 Gene muta Hoshida Y, 11896204 No data for ACE2  
 1 Gene polyn Su SL, Lu K 22147663 No data for ACE2  
 1 Gene polyn Zhang G, W 17984617 No data for ACE2  
 1 Gene-gene Su SL, Yang 24977181 No data for ACE2  
 1 Gene-polyr Burg M, Me 9352153 No data for ACE2  
 1 Genes invo Litovkina O 24727057 No data for ACE2  
 1 Genetic an: Szarvas N, ! 26826462 No data for ACE2  
 1 Genetic an: Freedman I 11071967 No data for ACE2  
 1 Genetic an: HorovĀĵ E, 22849862 No data for ACE2  
 1 Genetic an: Zhang D, G 22024547 No data for ACE2  
 1 Genetic de: St Peter SD 12364860 No data for ACE2  
 1 Genetic po Rambausel 3118258 No data for ACE2  
 1 Genetic po Zsom M, FĀ 22111818 No data for ACE2  
 1 Genetic po Jimenez-So 22817530 No data for ACE2  
 1 Genetic po Atanasova 15708542 No data for ACE2  
 1 Genetic po Buraczynsk 16384824 No data for ACE2

|    |                                                        |
|----|--------------------------------------------------------|
| 1  |                                                        |
| 2  | 1 Genetic po Huang HD, 21163122 No data for ACE2       |
| 3  | 1 Genetic po Lovati E, Ri 11422735 No data for ACE2    |
| 4  | 1 Genetic prε Kumar R, Sl 23846111 No data for ACE2    |
| 5  | 1 Genetic prε Nikolov IG, 1820343 No data for ACE2     |
| 6  | 1 Genetic prε Doria A, Wi 7909524 No data for ACE2     |
| 7  | 1 Genetic reε Kramer J, S 9334852 No data for ACE2     |
| 8  | 1 Genetic risl Tripathi G, 18242170 No data for ACE2   |
| 9  | 1 Genetic var Pirulli D, Cr 19229831 No data for ACE2  |
| 10 | 1 Genetic var Shaikh R, Sl 24737640 No data for ACE2   |
| 11 | 1 Genetic var Pai P, Hindε 9474350 No data for ACE2    |
| 12 | 1 Genetic var Boright AP, 15793268 No data for ACE2    |
| 13 | 1 Genetic var Tayo BO, Ki 22956460 No data for ACE2    |
| 14 | 1 Genetic var Kure M, Pe 21277817 No data for ACE2     |
| 15 | 1 Genetic var Xu CW, Wu 22932273 No data for ACE2      |
| 16 | 1 Genotypic ε Spare MK, 12919757 No data for ACE2      |
| 17 | 1 Genotypingε Wijnen PA, 18028890 No data for ACE2     |
| 18 | 1 Glu298Asp MÄ¶llsten . 17101543 No data for ACE2      |
| 19 | 1 Glutathionε Suvakov S, 23034843 No data for ACE2     |
| 20 | 1 Glutathionε Chen B, Bai 22116675 No data for ACE2    |
| 21 | 1 G-Protein ε Zychma MJ 10970984 No data for ACE2      |
| 22 | 1 G-protein ε ViklickÄ½ C 12424427 No data for ACE2    |
| 23 | 1 Haplotype ε Doi K, Noiri 16215641 No data for ACE2   |
| 24 | 1 HDL choles Radeau T, \ 10754410 No data for ACE2     |
| 25 | 1 Hidden poε Berger M, ε 16333311 No data for ACE2     |
| 26 | 1 High preval Tripathi G, 17042963 No data for ACE2    |
| 27 | 1 Homocyste Tamura T, I 9740165 No data for ACE2       |
| 28 | 1 How to har Saint-Marc 26316426 No data for ACE2      |
| 29 | 1 Hypertensi Basset el-E. 11926202 No data for ACE2    |
| 30 | 1 Hypertensi Kario K, Kai 9081678 No data for ACE2     |
| 31 | 1 Identificati Araki S, Ng 12874455 No data for ACE2   |
| 32 | 1 Identificati Yamada Y, 23539754 No data for ACE2     |
| 33 | 1 Identificati Torregrossi 20448065 No data for ACE2   |
| 34 | 1 Identificati Yu H, Bowc 9535413 No data for ACE2     |
| 35 | 1 Identificati Jacobasch C 7315101 No data for ACE2    |
| 36 | 1 Identificati Li M, Foo JI 26028593 No data for ACE2  |
| 37 | 1 Identificati Yang T, Me 24582653 No data for ACE2    |
| 38 | 1 Identificati Toncheva L 15365958 No data for ACE2    |
| 39 | 1 Identificati Ezzidi I, Mti 19787680 No data for ACE2 |
| 40 | 1 Immune re Nobuoka Y, 24454479 No data for ACE2       |
| 41 | 1 Immunoglε Demaine A 2985495 No data for ACE2         |
| 42 | 1 Impact of a Bantis C, Hi 21476902 No data for ACE2   |
| 43 | 1 Impact of C Elens L, Caε 24052064 No data for ACE2   |
| 44 | 1 Impact of C de Jonge H 24024898 No data for ACE2     |
| 45 | 1 Impact of C Yaowakulp 26635230 No data for ACE2      |
| 46 | 1 Impact of c Cho JH, Yoc 22310591 No data for ACE2    |
| 47 | 1 Impact of d Krajewska I 19857655 No data for ACE2    |
| 48 | 1 Impact of E Eller P, Hoc 17848394 No data for ACE2   |
| 49 | 1 Impact of g Siekierka-H 19681973 No data for ACE2    |
| 50 | 1 Impact of n El-Din Bess 21854353 No data for ACE2    |
| 51 | 1 Impact of p SchÄ¶n S, F 16164625 No data for ACE2    |
| 52 |                                                        |
| 53 |                                                        |
| 54 |                                                        |
| 55 |                                                        |
| 56 |                                                        |
| 57 |                                                        |
| 58 |                                                        |
| 59 |                                                        |
| 60 |                                                        |

1  
2 1 Impact of p Jung ES, Kir 21150220 No data for ACE2  
3 1 In vivo acti Lee JP, Yan 21429967 No data for ACE2  
4 1 Increased f Hsieh MC, I 10862639 No data for ACE2  
5 1 Increased f BlÃ¼thner 10200987 No data for ACE2  
6 1 Increased l Siddarth M 24216264 No data for ACE2  
7 1 Influence o Bantis C, H 21777344 No data for ACE2  
8 1 Influence o Marco MP, 11522087 No data for ACE2  
9 1 Influence o Provenzani 21922127 No data for ACE2  
10 1 Influence o Quteineh L 19067682 No data for ACE2  
11 1 Influence o Singh R, M 19486347 No data for ACE2  
12 1 Influence o Parchwani 26214998 No data for ACE2  
13 1 Influence o Nekooie-M 23649768 No data for ACE2  
14 1 Influence o Merta M, R 12697976 No data for ACE2  
15 1 Influence o Merta M, R 12212826 No data for ACE2  
16 1 Insertion/d Osono E, Ki 9820440 No data for ACE2  
17 1 Insertion/d Fedor R, As 21620105 No data for ACE2  
18 1 Interaction Stratta P, B 14767013 No data for ACE2  
19 1 Interaction Rahimi Z, H 21942443 No data for ACE2  
20 1 Interaction Reljic Z, Zla 25111321 No data for ACE2  
21 1 Is increase Ozdem S, Y 26022923 No data for ACE2  
22 1 Is Klothe F 11525534 No data for ACE2  
23 1 Is there a r Isbir CS, Ak 11525534 No data for ACE2  
24 1 Kinin-depe Molinaro G 17003818 No data for ACE2  
25 1 Lack of ass Arfa I, Abid 18404607 No data for ACE2  
26 1 Lack of ass Wong TY, C 10352194 No data for ACE2  
27 1 Lack of rela Tarnow L, C 7729604 No data for ACE2  
28 1 Lack of ser Moeller S, C 24732864 No data for ACE2  
29 1 Lack of syn Tarnow L, K 10907125 No data for ACE2  
30 1 Lipoprotein Sechi LA, Zi 10469373 No data for ACE2  
31 1 Low preval Trochen N, 15304560 No data for ACE2  
32 1 Major-hist Welch TR, I 3458025 No data for ACE2  
33 1 Manganese Lee SJ, Cho 16324912 No data for ACE2  
34 1 Manganese Kadir V, Uz 26787049 No data for ACE2  
35 1 Matrix met Marson BP, 22302011 No data for ACE2  
36 1 Matrix met Cozzolino M 19221176 No data for ACE2  
37 1 Membrano Gradden C 11181983 No data for ACE2  
38 1 Microarray Lim SC, Liu 19415232 No data for ACE2  
39 1 Microfluidi Sohni YR, B 12554058 No data for ACE2  
40 1 MTHFR C6 El-Baz R, Se 22554825 No data for ACE2  
41 1 Multiple su Al-Kateb H, 17914031 No data for ACE2  
42 1 Mutation a Zhang S, M 15775720 No data for ACE2  
43 1 MYH9 and Colares VS, 24658608 No data for ACE2  
44 1 MYH9 is a r Kopp JB, Sn 18794856 No data for ACE2  
45 1 MYH9 is as Kao WH, Kl 18794854 No data for ACE2  
46 1 MYH9-rela Pecci A, Kle 24186861 No data for ACE2  
47 1 Nephropat Orchard TJ, 12164879 No data for ACE2  
48 1 Nitric oxide Passauer J, 15840038 No data for ACE2  
49 1 Nitric oxide Rippin JD, F 12687343 No data for ACE2  
50 1 No associat Schmidt S, 7485124 No data for ACE2  
51 1 Nodular glc Wang, M; Z 26973293 No data for ACE2  
52 1 Non-muscl Freedman I 19567477 No data for ACE2  
53  
54  
55  
56  
57  
58  
59  
60

|    |                            |          |                  |
|----|----------------------------|----------|------------------|
| 1  | 1 NOS3 tagSI Ramanatha     | 24824375 | No data for ACE2 |
| 2  | 1 Nosocomia Phipps LM,     | 22129760 | No data for ACE2 |
| 3  | 1 Novel polyJ Jacobson P,  | 21206424 | No data for ACE2 |
| 4  | 1 Novel sequ Bahr C, Sch   | 16759312 | No data for ACE2 |
| 5  | 1 Optimizatic Thervet E, I | 20393454 | No data for ACE2 |
| 6  | 1 Oxidative s Tiwari AK, F | 18413200 | No data for ACE2 |
| 7  | 1 PAI-1 4G/5 Auceella F, M | 12748347 | No data for ACE2 |
| 8  | 1 Paraoxona: Eren Z, Kan   | 22555481 | No data for ACE2 |
| 9  | 1 Paraoxona: Agachan B,    | 15251338 | No data for ACE2 |
| 10 | 1 Paraoxona: Biasioli S, S | 12790379 | No data for ACE2 |
| 11 | 1 Paraoxona: KovÁjcs TJ,   | 17173245 | No data for ACE2 |
| 12 | 1 Paraoxona: Pinizzotto F  | 11206400 | No data for ACE2 |
| 13 | 1 Parathyroic Gohda T, SI  | 12046039 | No data for ACE2 |
| 14 | 1 Patients wi Sekine T, Ki | 20200500 | No data for ACE2 |
| 15 | 1 Pharmacog Larriba J, In  | 20172323 | No data for ACE2 |
| 16 | 1 Polymorph Canani LH,     | 11916943 | No data for ACE2 |
| 17 | 1 Polymorph Frimat L, Ph   | 11053482 | No data for ACE2 |
| 18 | 1 Polymorph Ko GJ, Kang    | 18771471 | No data for ACE2 |
| 19 | 1 Polymorph Yorioka T, S   | 8529313  | No data for ACE2 |
| 20 | 1 Polymorph Hanyu O, H     | 9509566  | No data for ACE2 |
| 21 | 1 Polymorph Auceella F, V  | 10773756 | No data for ACE2 |
| 22 | 1 Polymorph Nair SS, Sar   | 25894154 | No data for ACE2 |
| 23 | 1 Polymorph Chen Y, Hu     | 18079690 | No data for ACE2 |
| 24 | 1 Polymorph Cooke JN, E    | 21968013 | No data for ACE2 |
| 25 | 1 Polymorph Zhou H, Ch     | 26627442 | No data for ACE2 |
| 26 | 1 Polymorph Narne P, Pc    | 25041504 | No data for ACE2 |
| 27 | 1 Polymorph Nannipieri     | 11408388 | No data for ACE2 |
| 28 | 1 Polymorph Cheng W, Z     | 21245129 | No data for ACE2 |
| 29 | 1 Polymorph Freedman I     | 19177153 | No data for ACE2 |
| 30 | 1 Polymorph Araki S, Ma    | 11151764 | No data for ACE2 |
| 31 | 1 Polymorph RajkoviÄ† M    | 21620813 | No data for ACE2 |
| 32 | 1 Polymorph Sprovieri SI   | 15934435 | No data for ACE2 |
| 33 | 1 Posttranspl BariÄ©ty J,  | 11158216 | No data for ACE2 |
| 34 | 1 Prevalence Shanmugar     | 26440392 | No data for ACE2 |
| 35 | 1 Primary hy van der Ho    | 22844106 | No data for ACE2 |
| 36 | 1 Prognostic Hadjadj S, F  | 18523145 | No data for ACE2 |
| 37 | 1 Protein los: Wanner C,   | 7724034  | No data for ACE2 |
| 38 | 1 Quantitativ Tamano M,    | 15069174 | No data for ACE2 |
| 39 | 1 RAGE and C Franko B, B   | 26607824 | No data for ACE2 |
| 40 | 1 Rare mutat Sveinbjorn:   | 25082825 | No data for ACE2 |
| 41 | 1 Relation be Tang FY, Zh  | 21045268 | No data for ACE2 |
| 42 | 1 Relations b Shin Shin Y, | 15331206 | No data for ACE2 |
| 43 | 1 Relationshi Crawford A   | 22790458 | No data for ACE2 |
| 44 | 1 Relationshi Lim SC, Gol  | 16922713 | No data for ACE2 |
| 45 | 1 Relationshi Agrawal S,   | 18067039 | No data for ACE2 |
| 46 | 1 Relationshi Xue JN, Gu   | 26782518 | No data for ACE2 |
| 47 | 1 Relationshi Movva S, A   | 17616353 | No data for ACE2 |
| 48 | 1 Relationshi El-Shehaby   | 23198772 | No data for ACE2 |
| 49 | 1 Relationshi Cusinato D,  | 24528196 | No data for ACE2 |
| 50 | 1 Relationshi Santos KG,   | 16358232 | No data for ACE2 |

1  
2 1 Relationshi Huang XH, 9544854 No data for ACE2  
3 1 Relationshi Oh TG, Shir 8854649 No data for ACE2  
4 1 Relationshi Marre M, B 8314010 No data for ACE2  
5 1 Relationshi Xin HW, Xie 19048245 No data for ACE2  
6 1 Renin-angiotensin Lau YK, Wo 15153745 No data for ACE2  
7 1 Renin-angiotensin Chen WJ, H 24907556 No data for ACE2  
8 1 Replication Maeda S, Iw 23543049 No data for ACE2  
9 1 Resequencing McKnight A 17319955 No data for ACE2  
10 1 Re-Sequencing Hawkins G 26343748 No data for ACE2  
11 1 Risk factors Oue T, Naka 10580616 No data for ACE2  
12 1 Risk of advanced Zanchi A, M 10652017 No data for ACE2  
13 1 Role of alpha1 Conway BR 15187197 No data for ACE2  
14 1 Role of glycocalyx Powrie JK, 7819935 No data for ACE2  
15 1 Role of the Nicotinic J, Fre 11918733 No data for ACE2  
16 1 Serum paraoxon Suehiro T, I 12226554 No data for ACE2  
17 1 Serum paraoxon Itahara T, S 11480456 No data for ACE2  
18 1 Sick cell toxicity Hicks PJ, La 21849968 No data for ACE2  
19 1 Single nucleotide Alwohhaib 24821155 No data for ACE2  
20 1 Sirolimus polymorphisms Djebli N, R 17048977 No data for ACE2  
21 1 SIRTUIN 1 polymorphism Shimoyama 22200427 No data for ACE2  
22 1 Structural polymorphism Zaehner T, 11012876 No data for ACE2  
23 1 Suppression Matsui M, 24048373 No data for ACE2  
24 1 Survival in patients Padrão<sup>3</sup>-Mic 19014923 No data for ACE2  
25 1 Synergism between Testa A, M 25435339 No data for ACE2  
26 1 T(-786)-->C Asakimori 12138283 No data for ACE2  
27 1 Tacrolimus polymorphisms Li L, Li CJ, Z 21331500 No data for ACE2  
28 1 The A736V polymorphism Pelusi S, Gi 23433094 No data for ACE2  
29 1 The ACE inhibition van Dijk M 10831637 No data for ACE2  
30 1 The acetylation Tang SC, Le 20519229 No data for ACE2  
31 1 The angiotensin Hibberd MI 9025006 No data for ACE2  
32 1 The angiotensin Lu M, Zhan 27633502 No data for ACE2  
33 1 The association Geng F, Jia 22227166 No data for ACE2  
34 1 The C825T polymorphism Shcherbak 11322658 No data for ACE2  
35 1 The C825T polymorphism Fogarty DG 9833937 No data for ACE2  
36 1 The DD genotype Azar ST, Zal 11428725 No data for ACE2  
37 1 The DD genotype Vleming LJ, 10099885 No data for ACE2  
38 1 The effect of Nakayama 16312263 No data for ACE2  
39 1 The effect of Akgul SU, C 22841242 No data for ACE2  
40 1 The emergence Nogueira E 17161359 No data for ACE2  
41 1 The endothelial MÅllsten 19246226 No data for ACE2  
42 1 The frequency Rahimi Z, F 20853144 No data for ACE2  
43 1 The function Zhang W, Y 25447894 No data for ACE2  
44 1 The impact Kurzawski I 16044099 No data for ACE2  
45 1 The influenza McDonough 19373489 No data for ACE2  
46 1 The influenza Reiterová 15287194 No data for ACE2  
47 1 The influenza Reiterová 16526315 No data for ACE2  
48 1 The interaction Stratta P, C 22101623 No data for ACE2  
49 1 The manga Liu L, Zheng 18989629 No data for ACE2  
50 1 The N-acetylation Neugebauer 7851073 No data for ACE2  
51 1 The number Stern M, El 18444913 No data for ACE2  
52  
53  
54  
55  
56  
57  
58  
59  
60



|    |                                                      |
|----|------------------------------------------------------|
| 1  |                                                      |
| 2  | 1 The prevalence Sánchez-F 19715905 No data for ACE2 |
| 3  | 1 The PTPN22 Sfar L, Gorg 19328948 No data for ACE2  |
| 4  | 1 The renin- Ang-Ajyoot 10511770 No data for ACE2    |
| 5  | 1 The response Hodgkinsor 12606529 No data for ACE2  |
| 6  | 1 The role of Dixit M, Ma 12571380 No data for ACE2  |
| 7  | 1 The role of De Cosmo 12147786 No data for ACE2     |
| 8  | 1 The serum Paragh G, S 9736814 No data for ACE2     |
| 9  | 1 The V16A p MÅllsten 19834686 No data for ACE2      |
| 10 | 1 Thiopurine Aghdaie M 21819368 No data for ACE2     |
| 11 | 1 Time of drug Musuamba 19855314 No data for ACE2    |
| 12 | 1 Toward peptide Lampreabe 20970553 No data for ACE2 |
| 13 | 1 TPMT but r Kurzawski I 19229528 No data for ACE2   |
| 14 | 1 Tripterygiu Wen J, Li L, 19100464 No data for ACE2 |
| 15 | 1 Uromodulin KÅttgen A 19959715 No data for ACE2     |
| 16 | 1 Variants of Li GS, Zhan 17228361 No data for ACE2  |
| 17 | 1 Vitamin D r Mostowska 23065277 No data for ACE2    |
| 18 | 1 XbaI GLUT1 Stefanidis I 19822956 No data for ACE2  |
| 19 | 1 A knock-in Arsenault F 24121508 Non-human          |
| 20 | 1 An inducible Chowdhury 23336180 Non-human          |
| 21 | 1 Cardiac anæ Ferrario CM 26873967 Non-human         |
| 22 | 1 Carnosine t Peters V, S 21833769 Non-human         |
| 23 | 1 Chronic rer Stockelmar 9689017 Non-human           |
| 24 | 1 Control of I Shaws TB, I 4856818 Non-human         |
| 25 | 1 Decreased Uchio K, M 11014984 Non-human            |
| 26 | 1 Detection c Singh KP, R 10087325 Non-human         |
| 27 | 1 Effect of pñ Tenenhous 7873297 Non-human           |
| 28 | 1 Enhanced ç de Morais 2501210 Non-human             |
| 29 | 1 Fecal carriage Alonso S, M 17661289 Non-human      |
| 30 | 1 First WNK4 Gandolfi B, 23285264 Non-human          |
| 31 | 1 From man ò Olabisi O, A 27509583 Non-human         |
| 32 | 1 Gain-of-function Li N, Nakan 14695357 Non-human    |
| 33 | 1 Generation Fujimoto K, 17827337 Non-human          |
| 34 | 1 Increased iljuin T, Yu 18573875 Non-human          |
| 35 | 1 Kallikrein a Catanzaro C 6186886 Non-human         |
| 36 | 1 Kallikrein g Liu K, Li QZ 19307730 Non-human       |
| 37 | 1 Metabolic f Fujino H, Yi 12442637 Non-human        |
| 38 | 1 Multi-species Hamilton N 23408978 Non-human        |
| 39 | 1 MyoD cont Xiong Q, C 20336382 Non-human            |
| 40 | 1 N-Domain ò Bueno V, P 15194348 Non-human           |
| 41 | 1 Nitric oxide Migliori M, 10394113 Non-human        |
| 42 | 1 Overexpression Liu X, Zhao 19279555 Non-human      |
| 43 | 1 Purification Sekine M, F 7983056 Non-human         |
| 44 | 1 Rat Ace allæ Kamilic, J; F 21788250 Non-human      |
| 45 | 1 Re-engineer Davies B, H 26840484 Non-human         |
| 46 | 1 Role of ang Yang, XH; V 22580272 Non-human         |
| 47 | 1 Susceptibility Kleymenov 14604887 Non-human        |
| 48 | 1 Targeted d FrÅhlich L 20427744 Non-human           |
| 49 | 1 Telomerase Sachsinger 11454711 Non-human           |
| 50 | 1 Testosterone Smolen TN, 8437129 Non-human          |
| 51 | 1 The activated Wilson CH, 20531296 Non-human        |
| 52 |                                                      |
| 53 |                                                      |
| 54 |                                                      |
| 55 |                                                      |
| 56 |                                                      |
| 57 |                                                      |
| 58 |                                                      |
| 59 |                                                      |
| 60 |                                                      |

1 The gene I<sup>1</sup> Marion E, K 12086927 Non-human  
 1 The mll-AF<sup>1</sup> Dobson CL, 10393173 Non-human  
 1 The Pex1-G<sup>1</sup> Hiebler S, M 24503136 Non-human  
 1 The T309G de Martino 25415135 Non-human  
 1 Tissue-spec Hu JF, Orug 9482664 Non-human  
 1 Transgenic Liu Z, Segal 21303955 Non-human  
 1 Tubule-spe Zhou D, Li 22622501 Non-human  
 1 A common Wang H, Li 21282199 Non-human  
 1 A function<sup>1</sup> Herrera VL, 25615575 Non-human  
 1 Allelic Vari<sup>1</sup> Jia Z, Johns 26172442 Non-human  
 1 Alternative Ren S, Ngu 15788398 Non-human  
 1 An alternat Wang Y, Ne 11786430 Non-human  
 1 ARHGDI<sup>1</sup> n Gee HY, Sai 23867502 Non-human  
 1 Atrial natri<sup>1</sup> Nakagawa 25027872 Non-human  
 1 Autosomal Ryan S, Ver 20519437 Non-human  
 1 BAP1 misse Morrison A 25830670 Non-human  
 1 Blocking th Stenstr<sup>1</sup> Å 19657284 Non-human  
 1 Characteriz Qiu H, Dai 18508765 Non-human  
 1 Characteriz Gui J, Song 17389928 Non-human  
 1 CpG island Gillespie G 1709739 Non-human  
 1 Cystic echir Mitrea IL, I 23075460 Non-human  
 1 Cytotoxicit Ilinskaya O 14733942 Non-human  
 1 DAPIT Over Kontro H, C 26161955 Non-human  
 1 Dynamin-2 Hyndman K 26791826 Non-human  
 1 Evidence th Bittner MA 8626670 Non-human  
 1 Expression Zhang CJ, R 8294513 Non-human  
 1 Factor VIIa Sundaram . 24977291 Non-human  
 1 Fluorescen Liu J, Ernst 15489225 Non-human  
 1 Functional Tonna S, Di 18206321 Non-human  
 1 Generation Roy A, Goo 25477473 Non-human  
 1 Hepatitis C Hiasa Y, Ku 18459156 Non-human  
 1 Holocarbox Liu D, Zem 24840043 Non-human  
 1 Human GRI Wang Z, Ze 26667412 Non-human  
 1 Hypoxia inc Ward ME, T 16276418 Non-human  
 1 Î±1,3-galac Park JY, Pa 22775484 Non-human  
 1 Identificati Wang L, Ve 25906147 Non-human  
 1 Identificati Jung KA, Ch 23305850 Non-human  
 1 Implication Heilig C, Br 14578187 Non-human  
 1 Luteinizing Apaja PM, 16495341 Non-human  
 1 Maitotoxin Sinkins WG 19794142 Non-human  
 1 Mammalia Zhao Y, Zh 26061549 Non-human  
 1 Mediation Yao H, Bric 20966046 Non-human  
 1 Mitochond Chandler R 19088183 Non-human  
 1 Modulator Gray SG, Ig 12691522 Non-human  
 1 N-terminal Bodenstein 17220356 Non-human  
 1 Organizatic Cabral CM, 12181335 Non-human  
 1 p300 inter<sup>1</sup> Eid JE, Kun 11030627 Non-human  
 1 p38MAPK c Wong ES, L 19619499 Non-human  
 1 Pitchfork re Kinzel D, Bc 20643351 Non-human  
 1 Presence o Teixeira AC 23387326 Non-human



|    |                          |
|----|--------------------------|
| 1  |                          |
| 2  | 1 Primary hyp            |
| 3  | 1 Production Turner N, F |
| 4  | 1 PTPN2 con              |
| 5  | 1 Recombina              |
| 6  | 1 Renal angic            |
| 7  | 1 Renal colle            |
| 8  | 1 Role of the            |
| 9  | 1 Sprouty1 is            |
| 10 | 1 Three nove             |
| 11 | 1 TNF $\pm$ Amp          |
| 12 | 1 Truncated l            |
| 13 | 1 Use of the             |
| 14 | 1 YME1L con              |
| 15 | 1 Analysis of            |
| 16 | 1 Bardet-Bie             |
| 17 | 1 Brief Repor            |
| 18 | 1 Chromosor              |
| 19 | 1 DNA-based              |
| 20 | 1 Whole-gen              |
| 21 | 1 A family of            |
| 22 | 1 A Novel voi            |
| 23 | 1 Clinical assi          |
| 24 | 1 Familial no            |
| 25 | 1 Genetic coi            |
| 26 | 1 Genome-w               |
| 27 | 1 Identificati           |
| 28 | 1 Mistyping              |
| 29 | 1 MYH9 gene              |
| 30 | 1 Novel muta             |
| 31 | 1 Novel SMA              |
| 32 | 1 Porphyria i            |
| 33 | 1 Presentatic            |
| 34 | 1 RFLP-DR be             |
| 35 | 1 Superoxide             |
| 36 | 1 Verificati             |
| 37 | 1 A prospecti            |
| 38 | 1 ABCB1 (MC              |
| 39 | 1 ABCB1 poly             |
| 40 | 1 Acute kidn             |
| 41 | 1 An efficien            |
| 42 | 1 An unusua              |
| 43 | 1 Antiprotei             |
| 44 | 1 Captopril e            |
| 45 | 1 Role of the            |
| 46 | 1 Synergistic            |
| 47 | 1 The effect             |
| 48 | 1 A classifica           |
| 49 | 1 A function             |
| 50 | 1 A function             |
| 51 | 1 A method f             |
| 52 |                          |
| 53 |                          |
| 54 |                          |
| 55 |                          |
| 56 |                          |
| 57 |                          |
| 58 |                          |
| 59 |                          |
| 60 |                          |

1 A novel hu Barash U, C 20007507 Not a renal disease focus  
 1 A novel ME Braga E, Lo 21423093 Not a renal disease focus  
 1 A novel rec Larsson T, \ 15687325 Not a renal disease focus  
 1 A significan Wang YH, Y 19686770 Not a renal disease focus  
 1 A single nu Hirata H, N 12845675 Not a renal disease focus  
 1 Aberrant r Yuan J, Luo 12874023 Not a renal disease focus  
 1 Abnormal F Schwienba 10749116 Not a renal disease focus  
 1 Absence of Cooney KA, 10389923 Not a renal disease focus  
 1 Acetylator Hein DW, F 3677303 Not a renal disease focus  
 1 Adult leydi Carvajal-Ca 16757530 Not a renal disease focus  
 1 Adult renal Chapman-F 21665507 Not a renal disease focus  
 1 Allelic loss Mochida J, 18554638 Not a renal disease focus  
 1 Alterations Audebert M 10987279 Not a renal disease focus  
 1 Altered ger Stoyanova 15662135 Not a renal disease focus  
 1 Alternative Tomlinson 16288035 Not a renal disease focus  
 1 Amylase ± Jain S, Roy 24225843 Not a renal disease focus  
 1 An analysis Webster A 9758595 Not a renal disease focus  
 1 An intronic Chen T, Jac 15382067 Not a renal disease focus  
 1 Analysis of BernuÃ@s 9844606 Not a renal disease focus  
 1 Analysis of Ricketts C, 19551141 Not a renal disease focus  
 1 Analysis of Farker K, Le 10667834 Not a renal disease focus  
 1 Angiotensii Cambien F, 9519756 Not a renal disease focus  
 1 Angiotensii Stefansson 10855732 Not a renal disease focus  
 1 Antiepideri Shankar S, 16459265 Not a renal disease focus  
 1 Apolipopro Moore LE, I 19808960 Not a renal disease focus  
 1 Are cell cyc Mandal RK, 20822933 Not a renal disease focus  
 1 Association Xiao J, Zhu 22172840 Not a renal disease focus  
 1 Association Hirata H, O 15319295 Not a renal disease focus  
 1 Association Mittal RD, I 21668377 Not a renal disease focus  
 1 Association Mittal RD, S 21700414 Not a renal disease focus  
 1 Association Kesarwani 18668224 Not a renal disease focus  
 1 Association Wang W, G 22455395 Not a renal disease focus  
 1 Association Hashemi M 26475383 Not a renal disease focus  
 1 Association Srivastava I 22374248 Not a renal disease focus  
 1 Association Gangwar R, 20380574 Not a renal disease focus  
 1 Association Srivastava I 21784671 Not a renal disease focus  
 1 Association Mayer NJ, I 11836444 Not a renal disease focus  
 1 Base excisi Mittal RD, I 22019847 Not a renal disease focus  
 1 Biallelic ina Hamano K, 11792959 Not a renal disease focus  
 1 Bladder car Srivastava I 20826916 Not a renal disease focus  
 1 Blastemal e Natrajan R, 17145858 Not a renal disease focus  
 1 Breast canc Truong T, L 24919398 Not a renal disease focus  
 1 Cancer risk Garre P, Mi 24061861 Not a renal disease focus  
 1 Cancer risk Geoffroy-P 11410879 Not a renal disease focus  
 1 Cancer risk Win AK, Cle 21171015 Not a renal disease focus  
 1 Candidate Longuemat 10383153 Not a renal disease focus  
 1 Caspase 9 e Gangwar R, 19412632 Not a renal disease focus  
 1 Characteriz Bushey RT, 21164388 Not a renal disease focus  
 1 CHEK2 is a Cybulski C, 15492928 Not a renal disease focus  
 1 Chromoph Abrahams I 15569050 Not a renal disease focus

|    |                                                                |
|----|----------------------------------------------------------------|
| 1  |                                                                |
| 2  | 1 Chromosom Chung WY, 8842727 Not a renal disease focus        |
| 3  | 1 Circulating Deprimo SE 17605814 Not a renal disease focus    |
| 4  | 1 Clear cell p Shi SS, Sher 24294381 Not a renal disease focus |
| 5  | 1 Clear-cell p Rohan SM, 21602815 Not a renal disease focus    |
| 6  | 1 Coding mut O'Keefe D, 9311733 Not a renal disease focus      |
| 7  | 1 Combined i Pei J, Feder 20461753 Not a renal disease focus   |
| 8  | 1 Common g SchÄ¶del J, 22406644 Not a renal disease focus      |
| 9  | 1 Compreher Kondo K, Yi 11921283 Not a renal disease focus     |
| 10 | 1 Congenital Gordeuk VI 14726398 Not a renal disease focus     |
| 11 | 1 Constant al Pan CC, Chi 18085521 Not a renal disease focus   |
| 12 | 1 Constitutio Roversi G, I 26482194 Not a renal disease focus  |
| 13 | 1 CYP24A1 ai Jacobs ET, 23423976 Not a renal disease focus     |
| 14 | 1 CYP2E1 ger Farker K, Le 9760005 Not a renal disease focus    |
| 15 | 1 Cytochrom Chang I, Fu 25027399 Not a renal disease focus     |
| 16 | 1 Cytochrom Katoh T, In 7697828 Not a renal disease focus      |
| 17 | 1 Defects in t Perkins DJ, 14966282 Not a renal disease focus  |
| 18 | 1 Developme Pang Y, Li V 18778725 Not a renal disease focus    |
| 19 | 1 Distinct pat Kito H, Suzi 12442000 Not a renal disease focus |
| 20 | 1 DNA repair Mandal RK, 20070155 Not a renal disease focus     |
| 21 | 1 Do DNA reę Gangwar R, 19815090 Not a renal disease focus     |
| 22 | 1 Dominant-i Maynard M 17998805 Not a renal disease focus      |
| 23 | 1 Downregul Narimatsu 25315157 Not a renal disease focus       |
| 24 | 1 Duplicatio Fischer J, P 9715275 Not a renal disease focus    |
| 25 | 1 Effect of a t Huang Z, Lu 26323945 Not a renal disease focus |
| 26 | 1 EGF-r gene Moch H, Sa 9664910 Not a renal disease focus      |
| 27 | 1 EGFR sequę Franco-Her 17284372 Not a renal disease focus     |
| 28 | 1 Elevated cc Takashi M, 2515181 Not a renal disease focus     |
| 29 | 1 Endothelial Ziaei SA, Sa 23015399 Not a renal disease focus  |
| 30 | 1 Epigenetic Morrissey C 11585766 Not a renal disease focus    |
| 31 | 1 ERBB4 gen Hashemi M 27609473 Not a renal disease focus       |
| 32 | 1 Expression Vuononvirt 19318497 Not a renal disease focus     |
| 33 | 1 Expression Eickelmann 8313512 Not a renal disease focus      |
| 34 | 1 Expression Chung BI, M 14565870 Not a renal disease focus    |
| 35 | 1 Familial cle Woodward 10807693 Not a renal disease focus     |
| 36 | 1 Familial rer Liu H, Sund 21621909 Not a renal disease focus  |
| 37 | 1 FHIT gene ę Bugert P, M 9290948 Not a renal disease focus    |
| 38 | 1 Fluid intake Wang J, Wu 23632476 Not a renal disease focus   |
| 39 | 1 Fluorescen Jiang H, Bai 25119636 Not a renal disease focus   |
| 40 | 1 Frequent a Nagy A, Bal 12918080 Not a renal disease focus    |
| 41 | 1 Functional Horvath A, 19549888 Not a renal disease focus     |
| 42 | 1 Functional Hung MS, L 20625391 Not a renal disease focus     |
| 43 | 1 Functional Zhu J, Qin C 20572163 Not a renal disease focus   |
| 44 | 1 Gain-of-fur Hirota S, Ni 11276010 Not a renal disease focus  |
| 45 | 1 Gene-envir Semenza JC 11323315 Not a renal disease focus     |
| 46 | 1 Genetic alt Feng C, Xio 26662507 Not a renal disease focus   |
| 47 | 1 Genetic an Smits KM, ę 18245539 Not a renal disease focus    |
| 48 | 1 Genetic an Williams LF 17145815 Not a renal disease focus    |
| 49 | 1 Genetic an Cherubini E 26081799 Not a renal disease focus    |
| 50 | 1 Genetic Po Adabi Z, M 26319608 Not a renal disease focus     |
| 51 | 1 Genetic po Cao Q, Qin 21538578 Not a renal disease focus     |
| 52 |                                                                |
| 53 |                                                                |
| 54 |                                                                |
| 55 |                                                                |
| 56 |                                                                |
| 57 |                                                                |
| 58 |                                                                |
| 59 |                                                                |
| 60 |                                                                |

1 Genetic po Habib SL, D 17932460 Not a renal disease focus  
 2 1 Genetic Va Zhao R, Liu 26066055 Not a renal disease focus  
 3 1 Genetic var Mandal RK, 23054000 Not a renal disease focus  
 4 1 Genetic var Nuver J, Lu 15900213 Not a renal disease focus  
 5 1 Genetic var Tan X, Wan 24157827 Not a renal disease focus  
 6 1 Genomic a Gerlinger N 24487277 Not a renal disease focus  
 7 1 Germline B Ohar JA, Ch 26719535 Not a renal disease focus  
 8 1 Germline B de la Fouch 25080371 Not a renal disease focus  
 9 1 Germline B Popova T, F 23684012 Not a renal disease focus  
 10 1 Glutathion Sweeney C, 10794492 Not a renal disease focus  
 11 1 Glutathion Moore LE, I 17617661 Not a renal disease focus  
 12 1 Glutathion Buzio L, De 14504370 Not a renal disease focus  
 13 1 Glutathion Delbanco E 11218045 Not a renal disease focus  
 14 1 GSTM1, GS ChirilĂf DN 26158735 Not a renal disease focus  
 15 1 GSTT1, GST Salinas-SĂj 21458313 Not a renal disease focus  
 16 1 HABP2 G53 Tomsic J, F 26745718 Not a renal disease focus  
 17 1 HER2 prote Sasaki Y, Sa 24551292 Not a renal disease focus  
 18 1 hOGG1 Ser Zhao H, Qir 21166493 Not a renal disease focus  
 19 1 Hypoxia-re Koshikawa 16357173 Not a renal disease focus  
 20 1 Identificati Zatyka M, c 12097293 Not a renal disease focus  
 21 1 Immunoex GiuffrĂ G, 17390038 Not a renal disease focus  
 22 1 Impact of C Farker K, Le 9784018 Not a renal disease focus  
 23 1 Impact of g Ahmad ST, 22054067 Not a renal disease focus  
 24 1 Impact of n Pfab T, Stir 17563539 Not a renal disease focus  
 25 1 Impact of M Srivastava I 23872201 Not a renal disease focus  
 26 1 Impact of n Gangawar I 19242824 Not a renal disease focus  
 27 1 Increased   Wang WH, 8910385 Not a renal disease focus  
 28 1 Increased   Brown LF, E 8238242 Not a renal disease focus  
 29 1 Influence o Kesarwani I 20804486 Not a renal disease focus  
 30 1 Influence o BrĂning T 9285043 Not a renal disease focus  
 31 1 Influence o Marques I, 23645041 Not a renal disease focus  
 32 1 Influence o Gangwar R, 19041121 Not a renal disease focus  
 33 1 Inhibition k Kotelevets 9603913 Not a renal disease focus  
 34 1 Inhibition c Kondo K, Kl 12086860 Not a renal disease focus  
 35 1 Inhibition c Montgome 9797175 Not a renal disease focus  
 36 1 Insertion/d de Martino 21477733 Not a renal disease focus  
 37 1 Int7G24A v Chen T, Jac 16428477 Not a renal disease focus  
 38 1 Investigatir Uyar OA, Ki 21308654 Not a renal disease focus  
 39 1 Isocitrate d Rakheja D, 21225914 Not a renal disease focus  
 40 1 JAK3 in cle de Martino 21868263 Not a renal disease focus  
 41 1 KIT express Petit A, Cas 15105658 Not a renal disease focus  
 42 1 Lack of ass Piccoli MF, 17980059 Not a renal disease focus  
 43 1 LMP2, a no Zheng G, Cl 22705098 Not a renal disease focus  
 44 1 Loss of BAF Mochel MC 25972334 Not a renal disease focus  
 45 1 Loss of het Drake KM, 19789318 Not a renal disease focus  
 46 1 Loss of het Sithananda 2566144 Not a renal disease focus  
 47 1 Loss of het Bosnar MH 9341897 Not a renal disease focus  
 48 1 Mapping o Tang W, Fu 22228101 Not a renal disease focus  
 49 1 Matrix met Awakura Y, 16466849 Not a renal disease focus  
 50 1 MDM2 SNF Hirata H, H 17634539 Not a renal disease focus

|    |                                                                 |
|----|-----------------------------------------------------------------|
| 1  |                                                                 |
| 2  | 1 Meningiom Zang KD, 11528114 Not a renal disease focus         |
| 3  | 1 Metanephri Mantoan P, 23551615 Not a renal disease focus      |
| 4  | 1 MicroRNA Wei H, Ke H, 22517515 Not a renal disease focus      |
| 5  | 1 Microsatelli Machin P, C, 12139636 Not a renal disease focus  |
| 6  | 1 Mixed epitli Pierson CR, 11381370 Not a renal disease focus   |
| 7  | 1 Mucinous t Shen SS, Rc, 17240302 Not a renal disease focus    |
| 8  | 1 Mutations Barnabas N, 11967908 Not a renal disease focus      |
| 9  | 1 Mutations Gallou C, Jc, 10408776 Not a renal disease focus    |
| 10 | 1 Novel somi Yang K, Lin, 10454237 Not a renal disease focus    |
| 11 | 1 Occupatio Moore LE, I, 20663906 Not a renal disease focus     |
| 12 | 1 Oncocytic i Mai KT, Kol, 18251779 Not a renal disease focus   |
| 13 | 1 Oncocytic i Xia QY, Rac, 23826421 Not a renal disease focus   |
| 14 | 1 p53 mutati Imai Y, Stro, 7824511 Not a renal disease focus    |
| 15 | 1 Patients wi Skeldon SC, 22883484 Not a renal disease focus    |
| 16 | 1 Phase 1 trii Puzanov I, i, 25294187 Not a renal disease focus |
| 17 | 1 Phosphodiε Faucz FR, H, 20881257 Not a renal disease focus    |
| 18 | 1 Point muta Cairns P, Ev, 9671402 Not a renal disease focus    |
| 19 | 1 Polymorph Mandal RK, 20590474 Not a renal disease focus       |
| 20 | 1 Polymorph Du Y, Su T, 23069849 Not a renal disease focus      |
| 21 | 1 Polymorph George GP, 21396853 Not a renal disease focus       |
| 22 | 1 Polymorph Mandal RK, 22382185 Not a renal disease focus       |
| 23 | 1 Polymorph Deckers IA, 24978482 Not a renal disease focus      |
| 24 | 1 Polymorph Smits KM, ε, 17982751 Not a renal disease focus     |
| 25 | 1 Polymorph Sasaki M, T, 15041720 Not a renal disease focus     |
| 26 | 1 Prevalence van Houwe, 15932632 Not a renal disease focus      |
| 27 | 1 Progestero Mai KT, Tec, 18081814 Not a renal disease focus    |
| 28 | 1 Re-assessr WiesenhÃ¸, 17479278 Not a renal disease focus      |
| 29 | 1 Recurrent ε Torrezan G, 24909261 Not a renal disease focus    |
| 30 | 1 Reduced ε Thompson, 8971182 Not a renal disease focus         |
| 31 | 1 Relationshi Chen J, Che, 22296350 Not a renal disease focus   |
| 32 | 1 Relevance i Schraml P, 12937142 Not a renal disease focus     |
| 33 | 1 Renal cell c De Martinc, 20083259 Not a renal disease focus   |
| 34 | 1 Renal cell c Hughson M, 8959640 Not a renal disease focus     |
| 35 | 1 Renal cell c Lv C, Bai Z, 26191297 Not a renal disease focus  |
| 36 | 1 Renal cell c Karami S, B, 18566013 Not a renal disease focus  |
| 37 | 1 Renin in blk Taylor GM, 2450464 Not a renal disease focus     |
| 38 | 1 Replicative Singh V, Jai, 25218484 Not a renal disease focus  |
| 39 | 1 Retrospect Singh N, Sa, 25913740 Not a renal disease focus    |
| 40 | 1 Rhabdoid t Sredni ST, T, 25494491 Not a renal disease focus   |
| 41 | 1 Risk factor Wang G, Hc, 22000673 Not a renal disease focus    |
| 42 | 1 Risk of reni Ahmad ST, 22281432 Not a renal disease focus     |
| 43 | 1 Role of MN Srivastava I, 20574775 Not a renal disease focus   |
| 44 | 1 Role of the Hammerscl, 17143471 Not a renal disease focus     |
| 45 | 1 RTK/ERK pε Chen Y, Xin, 24223781 Not a renal disease focus    |
| 46 | 1 Somatic inε Prowse AH, 9106522 Not a renal disease focus      |
| 47 | 1 Somatic mε Alimov A, L, 10628321 Not a renal disease focus    |
| 48 | 1 Somatic mε Di Renzo M, 10734314 Not a renal disease focus     |
| 49 | 1 Structural k Forman JR, 19408298 Not a renal disease focus    |
| 50 | 1 Subtype-sp Williams RI, 20332316 Not a renal disease focus    |
| 51 | 1 Telomerasε Dahse R, Fi, 10504477 Not a renal disease focus    |
| 52 |                                                                 |
| 53 |                                                                 |
| 54 |                                                                 |
| 55 |                                                                 |
| 56 |                                                                 |
| 57 |                                                                 |
| 58 |                                                                 |
| 59 |                                                                 |
| 60 |                                                                 |



1 TERT Prom de Biase D, 26148423 Not a renal disease focus  
 1 The beta-si Glaser T, Le 3014343 Not a renal disease focus  
 1 The E3 liga: Zhang L, Ar 17694067 Not a renal disease focus  
 1 The extracc Blokhuis M 18049911 Not a renal disease focus  
 1 The Int7G2 Castillejo A 19930569 Not a renal disease focus  
 1 The polymc Qin C, Cao 21778301 Not a renal disease focus  
 1 The polymc Huang CY, 21982800 Not a renal disease focus  
 1 The pVHL-ε Clifford SC, 11526493 Not a renal disease focus  
 1 The relatio Peng CT, Cl 12469224 Not a renal disease focus  
 1 The role of Chang WS, 22993329 Not a renal disease focus  
 1 Trisomy 7-l Zhuang Z, F 9731534 Not a renal disease focus  
 1 Tumor-spe Zhao Q, Cal 23444225 Not a renal disease focus  
 1 Two single Wang WC, 25217002 Not a renal disease focus  
 1 Uncommor Brennan P, 17517688 Not a renal disease focus  
 1 Variants in Qin C, Cher 25239121 Not a renal disease focus  
 1 VHL alterat Brauch H, V 10766184 Not a renal disease focus  
 1 VHL and HI Lessi F, Ma 24446253 Not a renal disease focus  
 1 Vitamin D r Arjumand \ 21931993 Not a renal disease focus  
 1 Von Hippel Moore LE, l 22022277 Not a renal disease focus  
 1 Whole-exo Wang L, Tsi 22156295 Not a renal disease focus  
 1 XRCC3 Thr2 Loghin A, B 26682510 Not a renal disease focus  
 1 A biallelic g Nicod J, Br 12788845 Not a renal disease focus  
 1 A complem Funato M, l 24906628 Not a renal disease focus  
 1 A functionε Luo F, Wan 19635985 Not a renal disease focus  
 1 A functionε Svensson-F 21052022 Not a renal disease focus  
 1 A genome- Ferrari R, G 26154020 Not a renal disease focus  
 1 A homoalle Greenberg 8406453 Not a renal disease focus  
 1 A human p Garrone NF 19364400 Not a renal disease focus  
 1 A labor- an Tavira B, Gi 24830959 Not a renal disease focus  
 1 A low-freq Waterwort 25164947 Not a renal disease focus  
 1 A naturally Fouladkou 15140763 Not a renal disease focus  
 1 A novel mis Kovacs P, H 15220220 Not a renal disease focus  
 1 A novel phε Tham E, Ek 25966638 Not a renal disease focus  
 1 A novel ST> Linglart A, ( 15800843 Not a renal disease focus  
 1 A pilot stuc Brophy DF, 19210273 Not a renal disease focus  
 1 A polymorç MohÑjs M, 19834870 Not a renal disease focus  
 1 A study on Chmaisse F 19861867 Not a renal disease focus  
 1 A two-stagi Kuo TY, Kar 22534794 Not a renal disease focus  
 1 A WNK4 ge Mendes AI, 21236712 Not a renal disease focus  
 1 Abnormal l Drenth JP, 15057895 Not a renal disease focus  
 1 Absence of Fukumoto ! 8675577 Not a renal disease focus  
 1 ACE and PC de Azevedo 12126783 Not a renal disease focus  
 1 ACE gene ir Dell'omo G 16889537 Not a renal disease focus  
 1 ADAM33: a Holgate ST, 16257631 Not a renal disease focus  
 1 Admixture Bercovici S, 21385031 Not a renal disease focus  
 1 Adrenal hy Horvath A, 17178847 Not a renal disease focus  
 1 Allelic varia RodrÑ-gue: 15681296 Not a renal disease focus  
 1 Allelic varia Zschocke J, 16965804 Not a renal disease focus  
 1 Alleviating Grabczyk E 11121484 Not a renal disease focus  
 1 Allotypes o Davidson J 6399879 Not a renal disease focus

|    |   |             |              |          |                           |
|----|---|-------------|--------------|----------|---------------------------|
| 1  | 1 | Alpha-1-pr  | O'Donogh     | 8296629  | Not a renal disease focus |
| 2  | 1 | alpha-addu  | Clark CJ, Da | 11116113 | Not a renal disease focus |
| 3  | 1 | Alu-Alu rec | Franke G, E  | 19280651 | Not a renal disease focus |
| 4  | 1 | AMP-activ   | Mishra R, C  | 18250161 | Not a renal disease focus |
| 5  | 1 | An insertio | Rahmutula    | 10770265 | Not a renal disease focus |
| 6  | 1 | An intron 4 | Yokoyama     | 10867538 | Not a renal disease focus |
| 7  | 1 | Analyses of | Berge KE, B  | 9298743  | Not a renal disease focus |
| 8  | 1 | Analysis of | Zhu J, Fros  | 7641206  | Not a renal disease focus |
| 9  | 1 | Analysis of | Farook VS,   | 12359146 | Not a renal disease focus |
| 10 | 1 | Analysis of | Takatani R,  | 26479409 | Not a renal disease focus |
| 11 | 1 | Analysis of | Peros E, Ge  | 15754029 | Not a renal disease focus |
| 12 | 1 | Analysis of | Hamon Y, L   | 26607765 | Not a renal disease focus |
| 13 | 1 | Angiotensii | Nagi DK, M   | 8582133  | Not a renal disease focus |
| 14 | 1 | Angiotensii | Miller JA, S | 8995725  | Not a renal disease focus |
| 15 | 1 | Angiotensii | VaskÅ A, S   | 9607178  | Not a renal disease focus |
| 16 | 1 | Angiotensii | GutiÃ©rre:   | 9258285  | Not a renal disease focus |
| 17 | 1 | Angiotensii | Mansoor Q    | 22607040 | Not a renal disease focus |
| 18 | 1 | Angiotensii | Negi VS, De  | 25957879 | Not a renal disease focus |
| 19 | 1 | Angiotensii | Catarsi P, R | 16002416 | Not a renal disease focus |
| 20 | 1 | Angiotensii | Pedersen-E   | 19820429 | Not a renal disease focus |
| 21 | 1 | Angiotensii | Singh M, Si  | 27030424 | Not a renal disease focus |
| 22 | 1 | ANGIOTEN:   | LACHURIE,    | 7796503  | Not a renal disease focus |
| 23 | 1 | Angiotensii | Al-Awadhi    | 17631741 | Not a renal disease focus |
| 24 | 1 | Angiotensii | Prkacin I, N | 11505631 | Not a renal disease focus |
| 25 | 1 | Are the an  | ę Dikmen M,  | 16791358 | Not a renal disease focus |
| 26 | 1 | Assessmen   | He F, Liu M  | 27793583 | Not a renal disease focus |
| 27 | 1 | Association | Lewis JP, P  | 18443202 | Not a renal disease focus |
| 28 | 1 | Association | Holstein A,  | 15963101 | Not a renal disease focus |
| 29 | 1 | Association | Matsubara    | 10688808 | Not a renal disease focus |
| 30 | 1 | Association | Boomsma I    | 15830186 | Not a renal disease focus |
| 31 | 1 | Association | Sprovieri S  | 16047641 | Not a renal disease focus |
| 32 | 1 | Association | Song SB, Jir | 21342026 | Not a renal disease focus |
| 33 | 1 | Association | Liu H, Zhao  | 18235092 | Not a renal disease focus |
| 34 | 1 | Association | Orozco G, S  | 15641066 | Not a renal disease focus |
| 35 | 1 | Association | Bahramali I  | 26861937 | Not a renal disease focus |
| 36 | 1 | Association | Akai Y, Sat  | 10099886 | Not a renal disease focus |
| 37 | 1 | Association | Alsafar H, F | 26491214 | Not a renal disease focus |
| 38 | 1 | Association | Rabbani M.   | 18711292 | Not a renal disease focus |
| 39 | 1 | Association | Nikzamir A,  | 18154415 | Not a renal disease focus |
| 40 | 1 | Association | RodrÃ©gue:   | 11345362 | Not a renal disease focus |
| 41 | 1 | Association | Glorioso N,  | 17446437 | Not a renal disease focus |
| 42 | 1 | Association | Moholisa R   | 23730990 | Not a renal disease focus |
| 43 | 1 | Association | Lin CH, Che  | 24433515 | Not a renal disease focus |
| 44 | 1 | Association | Zhou X, Wa   | 20406624 | Not a renal disease focus |
| 45 | 1 | Association | Omori S, T   | 18162508 | Not a renal disease focus |
| 46 | 1 | Association | Elmonem M    | 26589000 | Not a renal disease focus |
| 47 | 1 | Association | Bochud M,    | 16612255 | Not a renal disease focus |
| 48 | 1 | Association | Vague P, Di  | 9165217  | Not a renal disease focus |
| 49 | 1 | Association | Kamide K, I  | 17143180 | Not a renal disease focus |
| 50 | 1 | Association | Ma Y, Ni W   | 21332417 | Not a renal disease focus |

1 Association Sucker C, H 17327284 Not a renal disease focus  
2 Association Cho ML, Ch 12765304 Not a renal disease focus  
3 Association Russo CJ, M 16103266 Not a renal disease focus  
4 Association Meng, N; Z 25359286 Not a renal disease focus  
5 Association Moez P, So 21818561 Not a renal disease focus  
6 Association Conen D, G 18698212 Not a renal disease focus  
7 Association Schwab M, 18209482 Not a renal disease focus  
8 Association Cakir OO, Y 26945655 Not a renal disease focus  
9 Association Hayakawa ` 17161225 Not a renal disease focus  
10 Association Zhou H, Mc 23303384 Not a renal disease focus  
11 Association Li X, An J, G 20540812 Not a renal disease focus  
12 Association Vazgiourak 17971359 Not a renal disease focus  
13 Association Busjahn A, 15107590 Not a renal disease focus  
14 Association Kawasaki A 20849588 Not a renal disease focus  
15 Association Kawasaki A 20617138 Not a renal disease focus  
16 Autosomal Magen D, C 25560765 Not a renal disease focus  
17 Autosomal JÃ¼ppner F 16831926 Not a renal disease focus  
18 Azathiopripr SchÃ¼tz E, 8721407 Not a renal disease focus  
19 Bimodal dis Mason CC, 21299892 Not a renal disease focus  
20 Biological n Haufroid V, 9342622 Not a renal disease focus  
21 Bobby Sox Choi YA, Se 24885382 Not a renal disease focus  
22 BRAF muta Choueiri Tk 22727996 Not a renal disease focus  
23 Calpain-10 Buraczynsk 23021796 Not a renal disease focus  
24 C-antineutr Griffith ME 8671812 Not a renal disease focus  
25 Carotid inti NergizoÃli 10493570 Not a renal disease focus  
26 CCL18: a ur Boot RG, V 16736095 Not a renal disease focus  
27 cGMP-depr Citterio L, F 24060892 Not a renal disease focus  
28 Characteriz Mark MR, C 8621659 Not a renal disease focus  
29 Cholesteryl Meguro S, ` 11369008 Not a renal disease focus  
30 Class II HLA Gilchrist FC 11393660 Not a renal disease focus  
31 Clinical and Lombardi C 24064758 Not a renal disease focus  
32 Clinical and Gomy I, Mc 20567917 Not a renal disease focus  
33 Clinical and Chacon-Cai 20447124 Not a renal disease focus  
34 Clinical imp van Woerd 15253729 Not a renal disease focus  
35 Clinical phe Han G, Wa 23946278 Not a renal disease focus  
36 Clinical pre Erlic Z, Ryb 19825962 Not a renal disease focus  
37 Common v. Sakiyama N 24882840 Not a renal disease focus  
38 Compleme da Rosa Uti 16164698 Not a renal disease focus  
39 Compreher Monico CG 17460142 Not a renal disease focus  
40 Concentrat Castegnaro 1820331 Not a renal disease focus  
41 Contributic Mondorf U 9524045 Not a renal disease focus  
42 Contributic Lasram K, E 24636221 Not a renal disease focus  
43 Control of s Wyatt RJ, F 6445926 Not a renal disease focus  
44 Crystal stru Lietha D, Cl 11597998 Not a renal disease focus  
45 CYP1B1 mu Campos-M 19234632 Not a renal disease focus  
46 CYP3A5 gei Fromm MF 16141800 Not a renal disease focus  
47 CYP4F2 ger Deng S, Zh 20227456 Not a renal disease focus  
48 Cystinosin l Ivanova EA 27083281 Not a renal disease focus  
49 Cytochrom Yen JH, Che 14611903 Not a renal disease focus  
50 Deletion pc Gharavi AG 8677872 Not a renal disease focus



|    |                                                                |
|----|----------------------------------------------------------------|
| 1  |                                                                |
| 2  | 1 Delineation Horn D, Wi 24129430 Not a renal disease focus    |
| 3  | 1 Detection c Pirulli D, Gi 11699734 Not a renal disease focus |
| 4  | 1 Detection c Matsumoto 11106834 Not a renal disease focus     |
| 5  | 1 Developme Coutton C, 20043897 Not a renal disease focus      |
| 6  | 1 Differential Mulivor RA 686677 Not a renal disease focus     |
| 7  | 1 Differential Simon P, Sc 17982254 Not a renal disease focus  |
| 8  | 1 Distinct pai Liu J, Nealo 15537666 Not a renal disease focus |
| 9  | 1 Distributor Diamantop 10821349 Not a renal disease focus     |
| 10 | 1 Distributor Hussain N, 23448612 Not a renal disease focus    |
| 11 | 1 Distributor Zhang L, Ja 7731160 Not a renal disease focus    |
| 12 | 1 DNase II pc Shin HD, Pa 15723160 Not a renal disease focus   |
| 13 | 1 Does comp Kavanagh L 16061287 Not a renal disease focus      |
| 14 | 1 Early (2008 Thomas CP 24207018 Not a renal disease focus     |
| 15 | 1 Effect of sy Mangos GJ 17132537 Not a renal disease focus    |
| 16 | 1 Effects of a Kulah E, Du 17625392 Not a renal disease focus  |
| 17 | 1 Elevated ur Clausen P, 10872702 Not a renal disease focus    |
| 18 | 1 Endothelial Tang FY, Xi 19965945 Not a renal disease focus   |
| 19 | 1 Endothelial Ksiazek P, V 14580231 Not a renal disease focus  |
| 20 | 1 Endothelial Tantawy A 25699607 Not a renal disease focus     |
| 21 | 1 Enhanced c Nakano T, C 11980680 Not a renal disease focus    |
| 22 | 1 eNOS gene Bazzaz JT, A 20565248 Not a renal disease focus    |
| 23 | 1 Epistatic ro Voskarides 23516419 Not a renal disease focus   |
| 24 | 1 Evaluation Rumsby G, 15327387 Not a renal disease focus      |
| 25 | 1 Evidence o Tsukada T, 9535806 Not a renal disease focus      |
| 26 | 1 Examinatio Friend LR, I 8800585 Not a renal disease focus    |
| 27 | 1 Exome seq Kiando SR, 26147384 Not a renal disease focus      |
| 28 | 1 Exome-wid Cutcutache 25597018 Not a renal disease focus      |
| 29 | 1 Exploring g Castro-SÃ¡n 26082521 Not a renal disease focus   |
| 30 | 1 Financial in Bilgel F, Ga 26218985 Not a renal disease focus |
| 31 | 1 Frequencie Zee RY, Ber 7882587 Not a renal disease focus     |
| 32 | 1 Functional Permana P 10873397 Not a renal disease focus      |
| 33 | 1 Functional Hoogendoc 15221787 Not a renal disease focus      |
| 34 | 1 Functional Montes T, 19255449 Not a renal disease focus      |
| 35 | 1 Functional Stec DE, Ro 17341693 Not a renal disease focus    |
| 36 | 1 Functional Coto E, Tav 20617557 Not a renal disease focus    |
| 37 | 1 Functional Lumb MJ, C 10960483 Not a renal disease focus     |
| 38 | 1 Further stu Danpure CJ 3416563 Not a renal disease focus     |
| 39 | 1 G protein b Thibaudin I 15200440 Not a renal disease focus   |
| 40 | 1 GBPI, a nov Liu QR, Zha 12974676 Not a renal disease focus   |
| 41 | 1 Gender diff Hokimoto S 25264752 Not a renal disease focus    |
| 42 | 1 Gene struc FernÃ¡ndez 10373324 Not a renal disease focus     |
| 43 | 1 Gene-gene Zhou XJ, Lu 21905002 Not a renal disease focus     |
| 44 | 1 Genetic an: AgÃ¡ndez J 8946479 Not a renal disease focus     |
| 45 | 1 Genetic ch: Ruiz-Lloren 14722919 Not a renal disease focus   |
| 46 | 1 Genetic dia Morey M, C 21902834 Not a renal disease focus    |
| 47 | 1 Genetic dis Westra D, 20106822 Not a renal disease focus     |
| 48 | 1 Genetic po Hovnik T, D 19752172 Not a renal disease focus    |
| 49 | 1 Genetic po Ã–ktem F, 24841661 Not a renal disease focus      |
| 50 | 1 Genetic po Olivieri O, T 10567188 Not a renal disease focus  |
| 51 | 1 Genetic prc Tousoulis D 23479071 Not a renal disease focus   |
| 52 |                                                                |
| 53 |                                                                |
| 54 |                                                                |
| 55 |                                                                |
| 56 |                                                                |
| 57 |                                                                |
| 58 |                                                                |
| 59 |                                                                |
| 60 |                                                                |

1  
2 1 Genetic risk Missouri C 8821841 Not a renal disease focus  
3 1 Genetic risk van Onna M 15326089 Not a renal disease focus  
4 1 Genetic variant Jiang DK, N 25802187 Not a renal disease focus  
5 1 Genetic variant Szperl M, D 19043368 Not a renal disease focus  
6 1 Genetic variant Sanghera D 17900266 Not a renal disease focus  
7 1 Genetic variant Bespalova I 22322903 Not a renal disease focus  
8 1 Genetic variant Jin HS, Hon 20090362 Not a renal disease focus  
9 1 Genetics, c Ghiggeri G 12500226 Not a renal disease focus  
10 1 Genome-wide Matsuo H, 25646370 Not a renal disease focus  
11 1 Genotype ε Tavilani H, 25264968 Not a renal disease focus  
12 1 Genotype-1 Vikkath N, 25952756 Not a renal disease focus  
13 1 Genotype-1 Wittström A 24555745 Not a renal disease focus  
14 1 Genotyping Warpeha K 10506586 Not a renal disease focus  
15 1 Germline n Angrist M, 8896568 Not a renal disease focus  
16 1 Germline n Salomon R, 8896569 Not a renal disease focus  
17 1 Germline V Stanojevic I 17688370 Not a renal disease focus  
18 1 Glutathione Mohammed 26773925 Not a renal disease focus  
19 1 Glutathione Yang Y, Kac 15492856 Not a renal disease focus  
20 1 Glutathione Delles C, Pa 18551009 Not a renal disease focus  
21 1 G-protein k Beige J, Rin 10978395 Not a renal disease focus  
22 1 G-Protein k Beige J, Hol 10205246 Not a renal disease focus  
23 1 G-protein k Zagradisnik 15337465 Not a renal disease focus  
24 1 G-protein r Muskalla A 25301854 Not a renal disease focus  
25 1 GSTM1, GS Mittal RD, I 19407363 Not a renal disease focus  
26 1 Haplotypes Pullmann R 18240231 Not a renal disease focus  
27 1 Hepatocyst Overton JD 26671672 Not a renal disease focus  
28 1 High aldost Escher G, C 19151144 Not a renal disease focus  
29 1 Higher frequency Barris-Olive 22796398 Not a renal disease focus  
30 1 Higher threshold Bavbek N, C 24580410 Not a renal disease focus  
31 1 Homozygote Moulson CI 16297189 Not a renal disease focus  
32 1 Human G(s) Makita N, S 17962410 Not a renal disease focus  
33 1 Human GFF Angrist M, . 9545641 Not a renal disease focus  
34 1 Hyperchole Gragnoli C. 21554682 Not a renal disease focus  
35 1 Identification Kokubo Y, I 15309683 Not a renal disease focus  
36 1 Identification Stoetzel C, 17160889 Not a renal disease focus  
37 1 Identification Mornet E, T 9781036 Not a renal disease focus  
38 1 Identification Tynismaa 10737991 Not a renal disease focus  
39 1 Identification Schmitz B, I 25210049 Not a renal disease focus  
40 1 Identification Purdue PE, 1703535 Not a renal disease focus  
41 1 Identification Yik WY, Ste 19105186 Not a renal disease focus  
42 1 Identification Stopkova P 15121481 Not a renal disease focus  
43 1 Identification Kunishima 11776386 Not a renal disease focus  
44 1 IFT27, encc Aldahmesh 24488770 Not a renal disease focus  
45 1 Immunology Wise PJ, Da 2443389 Not a renal disease focus  
46 1 Impact of c Miki I, Aoyu 12544691 Not a renal disease focus  
47 1 Impact of g Kamei H, N 23153768 Not a renal disease focus  
48 1 Impact of t Ristau T, Pa 24675670 Not a renal disease focus  
49 1 In vitro trans Prazes H, 21551259 Not a renal disease focus  
50 1 Increased ε Suehiro T, I 15164285 Not a renal disease focus  
51 1 Increased [ Morrison C 11381371 Not a renal disease focus  
52  
53  
54  
55  
56  
57  
58  
59  
60

|    |                                                                     |
|----|---------------------------------------------------------------------|
| 1  |                                                                     |
| 2  | 1 Increased $\epsilon$ Yamani MF 17097490 Not a renal disease focus |
| 3  | 1 Increased f Galbusera I 10397728 Not a renal disease focus        |
| 4  | 1 Increased f Onizuka M, 16044138 Not a renal disease focus         |
| 5  | 1 Increased r Abdgawad 16792675 Not a renal disease focus           |
| 6  | 1 Independent Morris BJ, Z 8104754 Not a renal disease focus        |
| 7  | 1 Inducible n Martin J, P: 15940772 Not a renal disease focus       |
| 8  | 1 Influence o Yanagimacl 20030680 Not a renal disease focus         |
| 9  | 1 INPPL1 is a HyvÄ¶inen 22486725 Not a renal disease focus          |
| 10 | 1 Insight into Habib SL. 19265534 Not a renal disease focus         |
| 11 | 1 Integrated Sobek AK, F 23010210 Not a renal disease focus         |
| 12 | 1 Interaction Wang W, S 23190752 Not a renal disease focus          |
| 13 | 1 Intron 4 po Lee YH, Kin 15119548 Not a renal disease focus        |
| 14 | 1 IRAK1b, a n Jensen LE, ' 11397809 Not a renal disease focus       |
| 15 | 1 Is factor V I Krieg S, Stu 16411392 Not a renal disease focus     |
| 16 | 1 Is polymorç Gluba A, B: 19505886 Not a renal disease focus        |
| 17 | 1 Isolation ar LÃ©vesque 9295060 Not a renal disease focus          |
| 18 | 1 Klotho gen Xu C, Song 23756195 Not a renal disease focus          |
| 19 | 1 Lack of ass Dell'Omo G 17563560 Not a renal disease focus         |
| 20 | 1 Lack of ass Orozco G, M 18078626 Not a renal disease focus        |
| 21 | 1 Lack of ass Tangri N, A 21565945 Not a renal disease focus        |
| 22 | 1 Lack of gen Wang J, Liu 26307914 Not a renal disease focus        |
| 23 | 1 Late-onset Mehler M, 9923 Not a renal disease focus               |
| 24 | 1 Leukocyte I Raghavan S 6770675 Not a renal disease focus          |
| 25 | 1 Lipoprotein Laschkolnig 24760552 Not a renal disease focus        |
| 26 | 1 Loss of fun Stiburek L, 19295170 Not a renal disease focus        |
| 27 | 1 LRRK2 G23 Gopalai AA 25243190 Not a renal disease focus           |
| 28 | 1 Lys(173)Arç Komiya I, Y 10720581 Not a renal disease focus        |
| 29 | 1 Manganese Tugcu V, O: 17628794 Not a renal disease focus          |
| 30 | 1 Manganese Mohamme 24819633 Not a renal disease focus              |
| 31 | 1 Matrix met Bahrehmar 25416694 Not a renal disease focus           |
| 32 | 1 Matrix met Buraczynsk 26025700 Not a renal disease focus          |
| 33 | 1 Mechanism Shimamotoç 2676859 Not a renal disease focus            |
| 34 | 1 Missense n Moon YW, 11007037 Not a renal disease focus            |
| 35 | 1 MKS1 regul Slaats GG, I 26490104 Not a renal disease focus        |
| 36 | 1 Molecular ; Udager AM 25602792 Not a renal disease focus          |
| 37 | 1 Molecular I Lovati E, Fe 10523024 Not a renal disease focus       |
| 38 | 1 Molecular I Bertelli M, 15505382 Not a renal disease focus        |
| 39 | 1 Molecular r Hou XH, So 26413058 Not a renal disease focus         |
| 40 | 1 Molecular r Wolford JK 10607908 Not a renal disease focus         |
| 41 | 1 Molecular r GÃ¼rntke S 25224765 Not a renal disease focus         |
| 42 | 1 Multiorgan Notari S, M 20098730 Not a renal disease focus         |
| 43 | 1 Mutation a Assink K, Sc 12753286 Not a renal disease focus        |
| 44 | 1 Mutation s Wang SH, V 22447252 Not a renal disease focus          |
| 45 | 1 Mutational Kinoshita Y 22577109 Not a renal disease focus         |
| 46 | 1 Mutations Li A, Davila 12529853 Not a renal disease focus         |
| 47 | 1 Mutations Siemiatkow 24084495 Not a renal disease focus           |
| 48 | 1 Mutations Calado RT, 17478638 Not a renal disease focus           |
| 49 | 1 Mutations Tucker EJ, V 24385928 Not a renal disease focus         |
| 50 | 1 MYH9-relat Seri M, Pec 12792306 Not a renal disease focus         |
| 51 | 1 N-acetyltra Juhanson P 18402670 Not a renal disease focus         |
| 52 |                                                                     |
| 53 |                                                                     |
| 54 |                                                                     |
| 55 |                                                                     |
| 56 |                                                                     |
| 57 |                                                                     |
| 58 |                                                                     |
| 59 |                                                                     |
| 60 |                                                                     |

1 Natural his Deegan PB, 16227523 Not a renal disease focus  
 2 1 New insight Hooker E, E 22982678 Not a renal disease focus  
 3 1 NFkappaB : Romzova M 17002901 Not a renal disease focus  
 4 1 N-glycosyla Riedl E, Ko 20460427 Not a renal disease focus  
 5 1 No associat Wolf G, Par 12147803 Not a renal disease focus  
 6 1 No associat Yildiz A, Ak 10657713 Not a renal disease focus  
 7 1 No associat Klauke B, M 18582803 Not a renal disease focus  
 8 1 No associat Lieb W, Bol 16822233 Not a renal disease focus  
 9 1 Nosocomia Naseer U, F 17295678 Not a renal disease focus  
 10 1 Novel miss Zhang C, Zf 22934535 Not a renal disease focus  
 11 1 Novel mutat Smith SJ, R 10320521 Not a renal disease focus  
 12 1 Novel mutat Yuan ZF, W 26253413 Not a renal disease focus  
 13 1 Novel NEK Grampa V, 26967905 Not a renal disease focus  
 14 1 Origin of ra Baxter GD, 2558964 Not a renal disease focus  
 15 1 Overexpres Coulter-Ma 15802217 Not a renal disease focus  
 16 1 Oxidative s Cal<sup>2+</sup> LA, P 12897089 Not a renal disease focus  
 17 1 Paraoxona: Zhang B, Et 14579940 Not a renal disease focus  
 18 1 Paraoxona: Bhatnagar ' 22854640 Not a renal disease focus  
 19 1 Paraoxona: Murata M, 15270786 Not a renal disease focus  
 20 1 Paraverteb Lee SH, Ag 22261628 Not a renal disease focus  
 21 1 Peripheral ' Thomas GM 14632699 Not a renal disease focus  
 22 1 Persistence Dudding BA 5682941 Not a renal disease focus  
 23 1 Pharmacol Miyata N, S 25237136 Not a renal disease focus  
 24 1 Phenotypic Travaglini L 23386033 Not a renal disease focus  
 25 1 Phosphoryl Dennis PB, 9614086 Not a renal disease focus  
 26 1 Polymorph Houldswor 25858271 Not a renal disease focus  
 27 1 Polymorph Wolford JK 11513557 Not a renal disease focus  
 28 1 Polymorph Ikeda Y, Su 15384959 Not a renal disease focus  
 29 1 Position of Pecci A, Pai 18059020 Not a renal disease focus  
 30 1 PPP2R2B C. Chen CM, F 18484086 Not a renal disease focus  
 31 1 Predicting t Whitfield M 17084425 Not a renal disease focus  
 32 1 Pre-treatm Ahmed WH 23538996 Not a renal disease focus  
 33 1 Prevalence Nazareth N 25994082 Not a renal disease focus  
 34 1 Proinflamr Borgmann 12722027 Not a renal disease focus  
 35 1 Proteasom Gragnoli C. 22934761 Not a renal disease focus  
 36 1 Protein exp Lim SD, Kir 17685929 Not a renal disease focus  
 37 1 Proteinase Gencik M, I 11115080 Not a renal disease focus  
 38 1 PYGM expr de Luna N, 25240406 Not a renal disease focus  
 39 1 Q222R pol Panneer D, 23963431 Not a renal disease focus  
 40 1 Random m Nickerson I 11241843 Not a renal disease focus  
 41 1 Reduced e Carter A, Bi 2890163 Not a renal disease focus  
 42 1 Regulatory Oczos J, Gri 22956172 Not a renal disease focus  
 43 1 Relationshi Fu Y, Katsu 15894833 Not a renal disease focus  
 44 1 Relationshi Heltianu C, 15784171 Not a renal disease focus  
 45 1 Relationshi Tripi LM, M 16729301 Not a renal disease focus  
 46 1 Renal ACE i Mizuiri S, Y 9469501 Not a renal disease focus  
 47 1 Renal chan Marre M, B 10082486 Not a renal disease focus  
 48 1 Renal onco Hes O, Micl 18196270 Not a renal disease focus  
 49 1 Renal outc Molad Y, G 11071585 Not a renal disease focus  
 50 1 Renin-angi Parsa A, Lo 15789057 Not a renal disease focus

|    |                                                                                           |
|----|-------------------------------------------------------------------------------------------|
| 1  |                                                                                           |
| 2  | 1 Renin-angiotensin system inhibitors Buraczyński A, S 14502296 Not a renal disease focus |
| 3  | 1 Renovascular disease Pizzolo F, M 14718831 Not a renal disease focus                    |
| 4  | 1 Resequencing Coto E, Reg 22765922 Not a renal disease focus                             |
| 5  | 1 Role of P450 cytochrome CYP2C9 Bräsen K, I 2060250 Not a renal disease focus            |
| 6  | 1 Role of PTPN22 López-Mejías A, M 26458874 Not a renal disease focus                     |
| 7  | 1 S-adenosylmethionine Feld JJ, Mo 20854821 Not a renal disease focus                     |
| 8  | 1 Selected ACE inhibitors Benhaj Mbarki M, B 21612638 Not a renal disease focus           |
| 9  | 1 Serum angiotensin-converting enzyme Inoue M, S 11092501 Not a renal disease focus       |
| 10 | 1 Serum angiotensin-converting enzyme Kimura F, H 12663605 Not a renal disease focus      |
| 11 | 1 Serum angiotensin-converting enzyme Ikeda Y, Su 9591753 Not a renal disease focus       |
| 12 | 1 Serum angiotensin-converting enzyme Atar A, Gec 26795139 Not a renal disease focus      |
| 13 | 1 Single nucleotide polymorphism Basson JJ, C 25063733 Not a renal disease focus          |
| 14 | 1 Single-nucleotide polymorphism Nishijima T 25151207 Not a renal disease focus           |
| 15 | 1 SIRT1 gene Weyrich P, 19014491 Not a renal disease focus                                |
| 16 | 1 Slight association Capoluongo L, 16806146 Not a renal disease focus                     |
| 17 | 1 SNP Variants Coulter-Matthews A, 25854853 Not a renal disease focus                     |
| 18 | 1 Soluble fms-like tyrosine kinase Jin J, Sison 23063127 Not a renal disease focus        |
| 19 | 1 Somatic mutations Weber A, H 22573489 Not a renal disease focus                         |
| 20 | 1 Spectrum of disease Guggilla SR 25982861 Not a renal disease focus                      |
| 21 | 1 Spondyloarthritis Briggs TA, F 26951490 Not a renal disease focus                       |
| 22 | 1 Structural changes Hall AV, An 7528745 Not a renal disease focus                        |
| 23 | 1 Structure of disease Hocking HC 18252712 Not a renal disease focus                      |
| 24 | 1 Studies of disease Rousseaoux J, 6215190 Not a renal disease focus                      |
| 25 | 1 Synergistic effects Barlassina C 10720960 Not a renal disease focus                     |
| 26 | 1 System-wide changes Zhang W, V 26949039 Not a renal disease focus                       |
| 27 | 1 T-cell receptor Niven MJ, C 1969400 Not a renal disease focus                           |
| 28 | 1 Testing of disease Schoenfeld DA 24667567 Not a renal disease focus                     |
| 29 | 1 The action of disease Smith NJ, S 19398560 Not a renal disease focus                    |
| 30 | 1 The association of disease Cikomola J 27461879 Not a renal disease focus                |
| 31 | 1 The association of disease Atay AE, Ak 24403014 Not a renal disease focus               |
| 32 | 1 The association of disease Safarinejad J 20505681 Not a renal disease focus             |
| 33 | 1 The calcineurin inhibitor Sole F, B 19556366 Not a renal disease focus                  |
| 34 | 1 The Captopril effect Hansson L, 9495662 Not a renal disease focus                       |
| 35 | 1 The consensus of disease Mesa-Torres A, 24957194 Not a renal disease focus              |
| 36 | 1 The effect of disease Ward NC, C 24984178 Not a renal disease focus                     |
| 37 | 1 The epidemic of disease Price LB, Jo 24345742 Not a renal disease focus                 |
| 38 | 1 The gene e Cramer SD, 10484776 Not a renal disease focus                                |
| 39 | 1 The inhibitory effect Wan KF, Sa 12624098 Not a renal disease focus                     |
| 40 | 1 The Leu262 polymorphism Hatunic M, 19185381 Not a renal disease focus                   |
| 41 | 1 The major polymorphisms Coulter-Matthews A, 15963748 Not a renal disease focus          |
| 42 | 1 The non-mutated allele Freedman I 20523037 Not a renal disease focus                    |
| 43 | 1 The presence of disease Gámez-Angel J, R 21332339 Not a renal disease focus             |
| 44 | 1 The Prevalence of disease Dreisbach A, 16202848 Not a renal disease focus               |
| 45 | 1 The PTPN22 polymorphism Jagiello P, 16320352 Not a renal disease focus                  |
| 46 | 1 The R620W polymorphism Reddy MV, 16052172 Not a renal disease focus                     |
| 47 | 1 The rapid effect of disease Nguyen TM 14665637 Not a renal disease focus                |
| 48 | 1 The role of disease Safarinejad J 20586099 Not a renal disease focus                    |
| 49 | 1 The role of disease Žžener EF, 24936541 Not a renal disease focus                       |
| 50 | 1 The role of disease Lee HT, Lin 25671815 Not a renal disease focus                      |
| 51 | 1 The role of disease Gluba A, Pi 19939821 Not a renal disease focus                      |
| 52 |                                                                                           |
| 53 |                                                                                           |
| 54 |                                                                                           |
| 55 |                                                                                           |
| 56 |                                                                                           |
| 57 |                                                                                           |
| 58 |                                                                                           |
| 59 |                                                                                           |
| 60 |                                                                                           |



1  
2  
3  
4  
5  
6  
7  
8  
9  
10  
11  
12  
13  
14  
15  
16  
17  
18  
19  
20  
21  
22  
23  
24  
25  
26  
27  
28  
29  
30  
31  
32  
33  
34  
35  
36  
37  
38  
39  
40  
41  
42  
43  
44  
45  
46  
47  
48  
49  
50  
51  
52  
53  
54  
55  
56  
57  
58  
59  
60

1 The role of Xu F, Morir 15139850 Not a renal disease focus  
 1 The role of Celi FS, Coş 18349068 Not a renal disease focus  
 1 The sirtuin Kanda T, Sa 26388050 Not a renal disease focus  
 1 The VHL sh Liu Y, Yang 27196060 Not a renal disease focus  
 1 Three nove Kamide K, T 15110905 Not a renal disease focus  
 1 Three nove Fukushima 24088670 Not a renal disease focus  
 1 Three nove Jap TS, Chit 21293852 Not a renal disease focus  
 1 Thrombin ε Donmez A, 15668188 Not a renal disease focus  
 1 Thrombotic Girolami A, 21842307 Not a renal disease focus  
 1 TMPRSS6 r: Pei SN, Ma 24782651 Not a renal disease focus  
 1 TNFAIP3 ge Kim SK, Ch 24489017 Not a renal disease focus  
 1 Trisomy 4 l Beghini A, F 10812167 Not a renal disease focus  
 1 Tropical cal Derikx MH, 19404200 Not a renal disease focus  
 1 Ubiquitin li Shen Y, Bal 16979136 Not a renal disease focus  
 1 Use of a Hi Chang DC, l 26606528 Not a renal disease focus  
 1 Variable nu Aoi N, Som 15785005 Not a renal disease focus  
 1 Variant scr Prochazka l 12490143 Not a renal disease focus  
 1 Variants in Wang Y, W 26448018 Not a renal disease focus  
 1 Vascular er Chen WC, C 12719950 Not a renal disease focus  
 1 Vascular er MaÅ, kiewic 27367286 Not a renal disease focus  
 1 VEGF-A anc Amosco MI 27668980 Not a renal disease focus  
 1 VHL c.505 T Bender BU, 11483638 Not a renal disease focus  
 1 VHL P25L is Pettman R 16884327 Not a renal disease focus  
 1 von Hippel- Hoffman M 11331612 Not a renal disease focus  
 1 When shou Erlic Z, Neu 19067729 Not a renal disease focus  
 1 Whole Exo Ma SL, Veg 26107949 Not a renal disease focus  
 1 [A search fr Voron'ko O 16080611 Not English or Spanish  
 1 [A study on Nishina M. 9014479 Not English or Spanish  
 1 [Acquired r Liu Z, Gong 12126523 Not English or Spanish  
 1 [Activation Braga EA, L 17086988 Not English or Spanish  
 1 [Angiotensi Krajina-Anc 23120809 Not English or Spanish  
 1 [Angiotensi Guan T, Liu 10436947 Not English or Spanish  
 1 [Arterial hy Oko A, Åoc 14974362 Not English or Spanish  
 1 [Associatio Fu LL, Lin Y, 22487833 Not English or Spanish  
 1 [Associatio Wang L, Pa 10923445 Not English or Spanish  
 1 [Associatio Qiu MY, Xie 25815490 Not English or Spanish  
 1 [Associatio Miloserdov 11234416 Not English or Spanish  
 1 [Associatio Zhang NN, 23225056 Not English or Spanish  
 1 [Associatio Sun XJ, Liu 17407071 Not English or Spanish  
 1 [Associatio Lu LH, Cher 18393230 Not English or Spanish  
 1 [Associatio Sun JY, Wa 24059111 Not English or Spanish  
 1 [Associatio Lin S, Qu H, 12421496 Not English or Spanish  
 1 [Associatio Kamysheva 15532370 Not English or Spanish  
 1 [Associatio BuraczyÅ,,s 12476891 Not English or Spanish  
 1 [Associativ Chistiakov l 12469627 Not English or Spanish  
 1 [Children w Qin M, Gor 25619354 Not English or Spanish  
 1 [Correlatio Sun ZJ, Wa 12905707 Not English or Spanish  
 1 [Correlatio Ren YY, Du 16480581 Not English or Spanish  
 1 [Correlativ Wu XX, Zhe 15698501 Not English or Spanish  
 1 [Distributio Dong JJ, Zh 18476541 Not English or Spanish

|    |                                                              |
|----|--------------------------------------------------------------|
| 1  |                                                              |
| 2  | 1 [DNA repai Akhmadish 25715450 Not English or Spanish       |
| 3  | 1 [Effect of ti Lin YF, Ma l 19094710 Not English or Spanish |
| 4  | 1 [Expressior Wang X, W 27430690 Not English or Spanish      |
| 5  | 1 [Factors re: Fu SJ, Wanl 19114346 Not English or Spanish   |
| 6  | 1 [Gene mut: Song Y, Ma 24229582 Not English or Spanish      |
| 7  | 1 [Gene poly Shao M, Ye 23981990 Not English or Spanish      |
| 8  | 1 [Genetic pr Bzoma B, D 19112833 Not English or Spanish     |
| 9  | 1 [GENETIC R Apolihin OI 26665756 Not English or Spanish     |
| 10 | 1 [I/D relatio Kaliev RR, E 16078593 Not English or Spanish  |
| 11 | 1 [Inactivatio MikhaÄler 18389622 Not English or Spanish     |
| 12 | 1 [Increased Gozzoli V, F 11075242 Not English or Spanish    |
| 13 | 1 [Is PstI poly Grzeszczak 9499204 Not English or Spanish    |
| 14 | 1 [Lipid pero: Eiselt J, Rac 7762187 Not English or Spanish  |
| 15 | 1 [Mutationa Zhao F, Yu : 25224051 Not English or Spanish    |
| 16 | 1 [Polymorpl ZieliÄska E 12868187 Not English or Spanish     |
| 17 | 1 [Polymorpl Xu JS, Bai Y 27346408 Not English or Spanish    |
| 18 | 1 [Polymorpl Kutyrina IM 10420452 Not English or Spanish     |
| 19 | 1 [Relationsh Wu S, Xianl 9596955 Not English or Spanish     |
| 20 | 1 [Relationsh Moleda P, I 17941464 Not English or Spanish    |
| 21 | 1 [Relationsh Liao L, Lei M 12016801 Not English or Spanish  |
| 22 | 1 [Renal effe Alinovi R, B 12197269 Not English or Spanish   |
| 23 | 1 [Renin-ang BuraczyÄs 11865575 Not English or Spanish       |
| 24 | 1 [Screening Yu H, Yao L 16027793 Not English or Spanish     |
| 25 | 1 [Search for Zotova EV, 15125229 Not English or Spanish     |
| 26 | 1 [Study on c Lu J, Li LM, 12848919 Not English or Spanish   |
| 27 | 1 [The associ Li C, Dong \ 11930675 Not English or Spanish   |
| 28 | 1 [The functi Rakhov DA, 1475876 Not English or Spanish      |
| 29 | 1 [Uric acid s Simmonds 118367 Not English or Spanish        |
| 30 | 1 A common Zhang Z, Qi 18820179 Paediatric individuals       |
| 31 | 1 A molecula Al-Hamed I 23595123 Paediatric individuals      |
| 32 | 1 A polymorç Imai Y, Oda 7586149 Paediatric individuals      |
| 33 | 1 ACE and AT Kostić M, 15179569 Paediatric individuals       |
| 34 | 1 ACE gene ir Sekerli E, K 19603195 Paediatric individuals   |
| 35 | 1 ACE gene ir Serdaroglu 16208534 Paediatric individuals     |
| 36 | 1 ACE gene p Tanaka R, li 9590186 Paediatric individuals     |
| 37 | 1 ACE gene p Sasongko T 16421456 Paediatric individuals      |
| 38 | 1 ACE gene p Fahmy ME, 18792483 Paediatric individuals       |
| 39 | 1 ACE gene p Celik US, Ni 16825089 Paediatric individuals    |
| 40 | 1 ADAMTS13 Choi HS, Ch 21488199 Paediatric individuals       |
| 41 | 1 Age and CY Gijsen V, M 21930396 Paediatric individuals     |
| 42 | 1 Angiotensii Al-Eisa A, H 11487079 Paediatric individuals   |
| 43 | 1 Angiotensii Bajpai M, P 14713838 Paediatric individuals    |
| 44 | 1 Angiotensii Patil SJ, Gu 16272677 Paediatric individuals   |
| 45 | 1 Angiotensii Pavlovic M, 9354852 Paediatric individuals     |
| 46 | 1 Angiotensii Rigoli L, Chi 15470205 Paediatric individuals  |
| 47 | 1 Angiotensii al-Eisa A, H 10986863 Paediatric individuals   |
| 48 | 1 Angiotensii Zhou J, Tiar 15315169 Paediatric individuals   |
| 49 | 1 Angiotensii Tsai IJ, Yanl 16645262 Paediatric individuals  |
| 50 | 1 Angiotensii BatiniÄ D, 25997642 Paediatric individuals     |
| 51 | 1 Associator Dhandapar 26154535 Paediatric individuals       |
| 52 |                                                              |
| 53 |                                                              |
| 54 |                                                              |
| 55 |                                                              |
| 56 |                                                              |
| 57 |                                                              |
| 58 |                                                              |
| 59 |                                                              |
| 60 |                                                              |

1 Association Dursun H, I 23570878 Paediatric individuals  
 2 Association Shahid S, A 22033511 Paediatric individuals  
 3 Association Xu ED, Xiao 27323137 Paediatric individuals  
 4 Association Åšladowski 26227630 Paediatric individuals  
 5 Bardet-Bier Benzinou M 17003356 Paediatric individuals  
 6 BRAF muta Chami R, Yi 26014474 Paediatric individuals  
 7 Clinical util SantÃ-n S, I 21415313 Paediatric individuals  
 8 Coagulatio Fadel FI, El 26829282 Paediatric individuals  
 9 Component Åšwierzko 26850322 Paediatric individuals  
 10 Conversion Lapeyraque 24435759 Paediatric individuals  
 11 Differentia Vockley J, M 6437214 Paediatric individuals  
 12 Disruption Ozaltin F, Ik 21722858 Paediatric individuals  
 13 Distributio Kurachi Y, C 11547947 Paediatric individuals  
 14 Effect of ar Saber-Ayac 20418353 Paediatric individuals  
 15 EIF2AK3 mi Jahnvi S, F 24168455 Paediatric individuals  
 16 Endothelial Dursun H, I 16941147 Paediatric individuals  
 17 Evaluation Graham C, 16397046 Paediatric individuals  
 18 G protein b Hocher B, F 12000471 Paediatric individuals  
 19 Gene polyn Kaplan Å°, 25262176 Paediatric individuals  
 20 Genetic po Frishberg Y 11096050 Paediatric individuals  
 21 Genetic po Chiou YH, V 22610055 Paediatric individuals  
 22 Genetic po Frishberg Y 9853248 Paediatric individuals  
 23 HbA1c leve DeÅjk B, Dr 12682823 Paediatric individuals  
 24 HLA extenc Lagueruela 1974661 Paediatric individuals  
 25 HLA-DQA1 Gbadegesir 25349203 Paediatric individuals  
 26 Impact of c Hussein A, 25939993 Paediatric individuals  
 27 Inflammasc Pontillo A, I 26182076 Paediatric individuals  
 28 Inherited n Lynch ED, C 9399897 Paediatric individuals  
 29 Is paraoxor Bilge I, Sirir 16175651 Paediatric individuals  
 30 Late effect: BÅjrdi E, Ol 15390293 Paediatric individuals  
 31 Linkage anc Hahn WH, 20372823 Paediatric individuals  
 32 Modificatic Rangel M, c 25170764 Paediatric individuals  
 33 Molecular : Van Norstr 17967976 Paediatric individuals  
 34 Mutations Tory K, Rou 19177160 Paediatric individuals  
 35 Nitric oxide Alasehirli B 19371282 Paediatric individuals  
 36 Nitric oxide Balat A, Ala 17365914 Paediatric individuals  
 37 Novel carb Sapio MR, 25875328 Paediatric individuals  
 38 Paraoxnase Al-Eisa AA, 26780374 Paediatric individuals  
 39 Paraoxona: Biyikli NK, 16565923 Paediatric individuals  
 40 Phosphodi Hahn WH, 20563733 Paediatric individuals  
 41 Platelet-act Xu H, Iijima 10873870 Paediatric individuals  
 42 Platelet-act Xu H, Iijima 9853251 Paediatric individuals  
 43 Polymorph Hahn WH, 21047277 Paediatric individuals  
 44 Polymorph Maruyama 11354780 Paediatric individuals  
 45 Polymorph Ece A, Teke 16109085 Paediatric individuals  
 46 Polymorph Savvidou A 20022049 Paediatric individuals  
 47 PON1 Q192 Vasconcelo 24972570 Paediatric individuals  
 48 Prostanoid NÅ¼sing R 9262230 Paediatric individuals  
 49 Renin-angi Papp F, Frie 12579405 Paediatric individuals  
 50 Report of a Uhrhamme 18629513 Paediatric individuals



|    |                                                              |
|----|--------------------------------------------------------------|
| 1  |                                                              |
| 2  | 1 Endothelial Tantawy A 25263931 Paediatric individuals      |
| 3  | 1 Major histc McEnery P 2702084 Paediatric individuals       |
| 4  | 1 ACE I/D ger Hohenfelln 10452281 Paediatric individuals     |
| 5  | 1 Impact of A Hohenfelln 11354781 Paediatric individuals     |
| 6  | 1 Role of plat Tanaka R, li 10430976 Paediatric individuals  |
| 7  | 1 ACE gene p Haszon I, Fi 12478352 Paediatric individuals    |
| 8  | 1 Renin-angi Pardo R, M 12579398 Paediatric individuals      |
| 9  | 1 ACE I/D ger Oktem F, Si 14986085 Paediatric individuals    |
| 10 | 1 Is ACE gene ErdoÄyan F 15138870 Paediatric individuals     |
| 11 | 1 Renin-angi Liu KP, Lin C 15045574 Paediatric individuals   |
| 12 | 1 Roles of pa BarÄjth A,   16912512 Paediatric individuals   |
| 13 | 1 Implication Hahn H, Ku 16133060 Paediatric individuals     |
| 14 | 1 Changes in Kaukinen A 20020158 Paediatric individuals      |
| 15 | 1 Renal mani Han KH, Lei 21210153 Paediatric individuals     |
| 16 | 1 C1GALT1 p He X, Zhao 22544166 Paediatric individuals       |
| 17 | 1 Cost-effect Krall P, Pine 24162162 Paediatric individuals  |
| 18 | 1 MMP-1 anc Djuric T, Zi 24414606 Paediatric individuals     |
| 19 | 1 Muscle inv Park E, Cho 24912603 Paediatric individuals     |
| 20 | 1 Coinheritar Lennon R, S 25739341 Paediatric individuals    |
| 21 | 1 Deficient fu Kvittingen I 6622096 Paediatric individuals   |
| 22 | 1 Significanc Hori C, Hira 11474225 Paediatric individuals   |
| 23 | 1 Induction c Ma J, Mats 21451433 Paediatric individuals     |
| 24 | 1 Sudden inf: RomÄjn R, 18075835 Paediatric individuals      |
| 25 | 1 The polymc SimoÄska- 18615395 Paediatric individuals       |
| 26 | 1 Thiopurine Dervieux T, 10594482 Paediatric individuals     |
| 27 | 1 Activation c Karlsson J,   25481751 Paediatric individuals |
| 28 | 1 Activation c Fischer DC, 19176689 Paediatric individuals   |
| 29 | 1 Association Laksmi NK, 20149750 Paediatric individuals     |
| 30 | 1 Clinicopath Huo Z, Lu T 27760550 Paediatric individuals    |
| 31 | 1 DD genoty Alasehirli B 22017506 Paediatric individuals     |
| 32 | 1 Effect of pæ Yilmaz A, Ei 19967651 Paediatric individuals  |
| 33 | 1 Endothelial Elshamaa M 21519233 Paediatric individuals     |
| 34 | 1 Endothelial Rusai K, Va 18334945 Paediatric individuals    |
| 35 | 1 ETV6-NTRK Knezevich S 9823307 Paediatric individuals       |
| 36 | 1 Expression: Tsuruga K, 26058859 Paediatric individuals     |
| 37 | 1 Founder m Elia A, Vosk 20805693 Paediatric individuals     |
| 38 | 1 Genes in thvan Eerde / 22558067 Paediatric individuals     |
| 39 | 1 Genetic an: Khan AO, A 24997176 Paediatric individuals     |
| 40 | 1 Genetic he: Shimoszawa 12794690 Paediatric individuals     |
| 41 | 1 Genetic po Sata F, Kuræ 20059664 Paediatric individuals    |
| 42 | 1 Genomic re Vervoort V: 12404110 Paediatric individuals     |
| 43 | 1 Glutathionc Elhasid R, k 20348973 Paediatric individuals   |
| 44 | 1 Glycosphin Dawson G. 5016302 Paediatric individuals        |
| 45 | 1 Heterogenc Wildin RS, / 7913579 Paediatric individuals     |
| 46 | 1 HLA class II Djilali-Saiaf 17050030 Paediatric individuals |
| 47 | 1 HPSE2 mut Bulum B, Ä 25924634 Paediatric individuals       |
| 48 | 1 Hypophosp Rutsch F, B. 20016754 Paediatric individuals     |
| 49 | 1 Implication Ozen S, Alih 10401028 Paediatric individuals   |
| 50 | 1 Lethal cysti Simpson M 19303681 Paediatric individuals     |
| 51 | 1 Loss of nep Bergmann   18371931 Paediatric individuals     |
| 52 |                                                              |
| 53 |                                                              |
| 54 |                                                              |
| 55 |                                                              |
| 56 |                                                              |
| 57 |                                                              |
| 58 |                                                              |
| 59 |                                                              |
| 60 |                                                              |

1 1 Low renin- $\alpha$  Peruzzi L, L 16006956 Paediatric individuals  
2 1 Molecular  $\alpha$  Elhayek D, 24252324 Paediatric individuals  
3 1 Mutation s Winberg J, 24416387 Paediatric individuals  
4 1 Mutational Boyer O, B $\epsilon$  20591883 Paediatric individuals  
5 1 Mutations Frank V, Ha 23418306 Paediatric individuals  
6 1 Novel ATP $\epsilon$  Stover EH, 12414817 Paediatric individuals  
7 1 Polymorph Amoroso A 9870486 Paediatric individuals  
8 1 Renin-angi Ozkaya O,  $\epsilon$  16521052 Paediatric individuals  
9 1 RET and G $\epsilon$  Jeanpierre 21490379 Paediatric individuals  
10 1 Role of tru Debiec H, M 15464186 Paediatric individuals  
11 1 Streptokin $\alpha$  Tewodros \ 7783598 Paediatric individuals  
12 1 The associa Rotman Y, | 20684021 Paediatric individuals  
13 1 Variability i Ferroni MA 8880047 Paediatric individuals  
14 1 CYP2C9 ger Joy MS, Do 19669737 Pharmaceutical drug focus  
15 1 Enalapril ar Rashtchiza $\alpha$  17222813 Pharmaceutical drug focus  
16 1 Exaggerate Simonsen J 21749320 Pharmaceutical drug focus  
17 1 Long-term Andersen S 12716812 Pharmaceutical drug focus  
18 1 Renin-angi Norooziana $\alpha$  17524880 Pharmaceutical drug focus  
19 1 Venous res Mitchell A, 14586390 Pharmaceutical drug focus  
20 1 Association Xin HW, Liu 24691060 Pharmaceutical drug focus  
21 1 Association Liu X, Li J, F 25587129 Pharmaceutical drug focus  
22 1 Comparing Cai J, Huan $\alpha$  22149319 Pharmaceutical drug focus  
23 1 Comparison Niiooka T, Sa $\alpha$  23073468 Pharmaceutical drug focus  
24 1 CYP2C9\*2  $\alpha$  Ragia G, Ta 24464600 Pharmaceutical drug focus  
25 1 CYP3A5 ger Picard N, R $\alpha$  21389905 Pharmaceutical drug focus  
26 1 CYP3A5 ger Hesselink C 18334918 Pharmaceutical drug focus  
27 1 CYP3A5 poi Song J, Kim 22947591 Pharmaceutical drug focus  
28 1 Cytochrom Winoto J, S 21543025 Pharmaceutical drug focus  
29 1 Drug-resist Hantz S, Ga 20961907 Pharmaceutical drug focus  
30 1 Effect of ar Penno G, C 9726242 Pharmaceutical drug focus  
31 1 Effect of de Parving HH 8806248 Pharmaceutical drug focus  
32 1 Effects of e Glicklich D, 10428268 Pharmaceutical drug focus  
33 1 Endothelial Cheema BS 23260854 Pharmaceutical drug focus  
34 1 Endothelial Cherney D $\alpha$  19037250 Pharmaceutical drug focus  
35 1 Genetic an $\alpha$  Singer JB, F 17563401 Pharmaceutical drug focus  
36 1 Genetic an $\alpha$  Jacobson P. 22334041 Pharmaceutical drug focus  
37 1 Genetic ass Watson B J 8794836 Pharmaceutical drug focus  
38 1 Genetic po Vu D, Telle $\alpha$  23721685 Pharmaceutical drug focus  
39 1 Genetic var Tapirdama $\alpha$  25014506 Pharmaceutical drug focus  
40 1 Human thic Weyer N, K 11417444 Pharmaceutical drug focus  
41 1 Impact of t Ro H, Min  $\epsilon$  23149441 Pharmaceutical drug focus  
42 1 Impact of t Lely AT, var 18077786 Pharmaceutical drug focus  
43 1 In vivo CYP de Jonge H. 21753749 Pharmaceutical drug focus  
44 1 Individualiz Chen SY, Li 23432535 Pharmaceutical drug focus  
45 1 Influence o Kagaya H, M 22106207 Pharmaceutical drug focus  
46 1 Lack of ass $\alpha$  Hoffmann I 21871624 Pharmaceutical drug focus  
47 1 Matrix met Kurzawski I 16945025 Pharmaceutical drug focus  
48 1 Matrix met Drozdzik A, 19778329 Pharmaceutical drug focus  
49 1 Modulatin $\alpha$  Abdin AA, F 19553142 Pharmaceutical drug focus  
50 1 Nifedipine Verhaar M $\alpha$  10533616 Pharmaceutical drug focus  
51  
52  
53  
54  
55  
56  
57  
58  
59  
60

1  
2  
3  
4  
5  
6  
7  
8  
9  
10  
11  
12  
13  
14  
15  
16  
17  
18  
19  
20  
21  
22  
23  
24  
25  
26  
27  
28  
29  
30  
31  
32  
33  
34  
35  
36  
37  
38  
39  
40  
41  
42  
43  
44  
45  
46  
47  
48  
49  
50  
51  
52  
53  
54  
55  
56  
57  
58  
59  
60

1 Pharmacog Okamura A 10535720 Pharmaceutical drug focus  
1 Pharmacog Lennard L, 2758725 Pharmaceutical drug focus  
1 Presence o Ragia G, Pe 19891554 Pharmaceutical drug focus  
1 Randomize Kvetny J, G 11181984 Pharmaceutical drug focus  
1 Risk of tacr Hooper DK, 22491658 Pharmaceutical drug focus  
1 The influen Luik PT, Ho 12856080 Pharmaceutical drug focus  
1 The norbor Kessler M, 10854736 Pharmaceutical drug focus  
3 Investigatic Currie D, M 20854388 < 3 populations reported per SNP  
3 Polymorph Frojdo, S; S 16211375 < 3 populations reported per SNP  
3 Angiotensii Yang, HY; L 23477970 < 3 populations reported per SNP

For peer review only

## Supplementary Table S3c

| Exclusion S Title | Authors         | PMID              | Reason   |                             |
|-------------------|-----------------|-------------------|----------|-----------------------------|
| 1                 | Identificati    | Chen, Z; W        | 27756246 | Gene expression based study |
| 2                 | 1 A disease h   | Ng, DPK; PI       | 16936219 | No data for AGT             |
| 3                 | 1 A polymorç    | Mollsten, A       | 21316998 | No data for AGT             |
| 4                 | 1 A rare hapl   | Martin, RJL       | 19783860 | No data for AGT             |
| 5                 | 1 ACACÎ² gen    | Shah VN, C        | 23081748 | No data for AGT             |
| 6                 | 1 ACE gene p    | Felehgari, \      | 20830509 | No data for AGT             |
| 7                 | 1 alpha(1)-ar   | Perdu, J; Gi      | 16531799 | No data for AGT             |
| 8                 | 1 Analysis of   | Drouet, M;        | 12005241 | No data for AGT             |
| 9                 | 1 Angiotensii   | Yildiz A, Ya;     | 12832741 | No data for AGT             |
| 10                | 1 Angiotensii   | Haque, SF; NA     |          | No data for AGT             |
| 11                | 1 Angiotensii   | Schmidt, S;       | 9269698  | No data for AGT             |
| 12                | 1 Angiotensii   | Grzeszczak,       | 9727375  | No data for AGT             |
| 13                | 1 Angiotensii   | Stratta, P; C     | 10352195 | No data for AGT             |
| 14                | 1 Angiotensii   | El-Banawy, NA     |          | No data for AGT             |
| 15                | 1 Angiotensii   | Buraczynsk        | 12187084 | No data for AGT             |
| 16                | 1 Angiotensii   | Yoneda, A;        | 12187255 | No data for AGT             |
| 17                | 1 Angiotensii   | Uhm, WS; I        | 12043886 | No data for AGT             |
| 18                | 1 Angiotensii   | Woo KT, La        | 18536822 | No data for AGT             |
| 19                | 1 Angiotensii   | Schmidt, A;       | 8785402  | No data for AGT             |
| 20                | 1 Angiotensii   | Ergen, HA; NA     |          | No data for AGT             |
| 21                | 1 Angiotensii   | Tarnow L, C       | 8671962  | No data for AGT             |
| 22                | 1 Association   | Golmoham NA       |          | No data for AGT             |
| 23                | 1 Association   | Gao, JX; Zh       | 26045844 | No data for AGT             |
| 24                | 1 Association   | Conen D, G        | 18698212 | No data for AGT             |
| 25                | 1 Association   | Bagci, B; Bâ      | 27118566 | No data for AGT             |
| 26                | 1 Carnosine ç   | Janssen, B;       | 16046297 | No data for AGT             |
| 27                | 1 Clinical impç | Amorim, Ci        | 23362199 | No data for AGT             |
| 28                | 1 Defining Ur   | Abushufa, ,       | 25546407 | No data for AGT             |
| 29                | 1 Different N   | Nakayama,         | 19293592 | No data for AGT             |
| 30                | 1 DNA polym     | Freire, MB;       | 9794558  | No data for AGT             |
| 31                | 1 Effect of AC  | BÃ¶lger CA,       | 16961167 | No data for AGT             |
| 32                | 1 Effects of e  | Glicklich, D      | 10428268 | No data for AGT             |
| 33                | 1 Endothelial   | Cheema, B;        | 23260854 | No data for AGT             |
| 34                | 1 GENETIC Pç    | DORIA, A; \       | 7909524  | No data for AGT             |
| 35                | 1 Haplotype ç   | Doi, K; Noir      | 16215641 | No data for AGT             |
| 36                | 1 Hereditary    | Marre, M; I       | 10922971 | No data for AGT             |
| 37                | 1 High preval   | Tripathi G,       | 17042963 | No data for AGT             |
| 38                | 1 Impact of P   | Jung, ES; Ki      | 21150220 | No data for AGT             |
| 39                | 1 Increased ç   | Ulrich, C; H      | 16476718 | No data for AGT             |
| 40                | 1 Insertion/d   | Demurov, I NA     |          | No data for AGT             |
| 41                | 1 Involvement   | Yamada, K;        | 11349729 | No data for AGT             |
| 42                | 1 Kinin-depe    | Molinaro G        | 17003818 | No data for AGT             |
| 43                | 1 Lack Of Rel   | Tarnow, L;        | 7729604  | No data for AGT             |
| 44                | 1 Neuropept     | Ito, H; Mor       | 10363627 | No data for AGT             |
| 45                | 1 NO ASSOCI     | SCHMIDT, ç        | 7485124  | No data for AGT             |
| 46                | 1 Plasma ren    | Deinum, J;        | 10462269 | No data for AGT             |
| 47                | 1 Polymorph     | Liu, ZH; Li, I NA |          | No data for AGT             |
| 48                | 1 Polymorph     | Chistyakov, NA    |          | No data for AGT             |

|    |                                                       |
|----|-------------------------------------------------------|
| 1  |                                                       |
| 2  | 1 Polymorph Hanyu, O; F 9509566 No data for AGT       |
| 3  | 1 Polymorph Yorioka, T; 8529313 No data for AGT       |
| 4  | 1 Polymorph Frojdo, S; S 16211375 No data for AGT     |
| 5  | 1 Proteomic Kwak, NJ; V 21136694 No data for AGT      |
| 6  | 1 Relations b Shin, YS; Bæ 15331206 No data for AGT   |
| 7  | 1 Relationshi Movva, S; A 17616353 No data for AGT    |
| 8  | 1 Relationshi Oh TG, Shir 8854649 No data for AGT     |
| 9  | 1 Relationshi Marre, M; I 8314010 No data for AGT     |
| 10 | 1 Renal perfu Lansang, M 12086929 No data for AGT     |
| 11 | 1 Role of trar Inigo, P; Lai 14558330 No data for AGT |
| 12 | 1 Serological Coppo, R; A 17988266 No data for AGT    |
| 13 | 1 Susceptibili Hanna, MC 25316403 No data for AGT     |
| 14 | 1 Synergistic Doria, A; O 9389421 No data for AGT     |
| 15 | 1 Synergistic Wakahara, 17303661 No data for AGT      |
| 16 | 1 The angiotæ Hibberd, M 9025006 No data for AGT      |
| 17 | 1 The angiotæ Lu, M; Zhar 27633502 No data for AGT    |
| 18 | 1 The effect ç Nakayama, 16312263 No data for AGT     |
| 19 | 1 The freque Rahimi, Z; F 20853144 No data for AGT    |
| 20 | 1 The influen Maixnerov; 17328840 No data for AGT     |
| 21 | 1 The influen Maixnerov; 18498720 No data for AGT     |
| 22 | 1 The ras res Bonomo, J/ 25027322 No data for AGT     |
| 23 | 1 Transformi August, P; !NA No data for AGT           |
| 24 | 1 20-Hydroxy Savas, S; W NA Non-human                 |
| 25 | 1 Acute elevæ Frisbee, JC; 10329253 Non-human         |
| 26 | 1 Adenosine Gao, X; Pelæ 25251152 Non-human           |
| 27 | 1 Adrenomeç Caron, K; H 17360661 Non-human            |
| 28 | 1 Angiotensii Shahid, SM 24035938 Non-human           |
| 29 | 1 Angiotensii Jonsson, JR 11438504 Non-human          |
| 30 | 1 Angiotensii Noshiro, T; NA Non-human                |
| 31 | 1 Appropriat Catanzaro I 9931123 Non-human            |
| 32 | 1 Associatio Soria, LA; C 19665052 Non-human          |
| 33 | 1 Blood pres: Venegas-Pæ 21900645 Non-human           |
| 34 | 1 Blood pres: Bohlander, 22728903 Non-human           |
| 35 | 1 Cardiac anç Ferrario CM 26873967 Non-human          |
| 36 | 1 CCN1 expræ Bonda, TA; 23690222 Non-human            |
| 37 | 1 Chronic hyj Merrill, DC; 8613528 Non-human          |
| 38 | 1 Compensat Wang, Q; H 11380824 Non-human             |
| 39 | 1 Co-operatiç Stepinski, J 11016869 Non-human         |
| 40 | 1 Cosegregat Yu, H; Harræ 9794718 Non-human           |
| 41 | 1 Effect of so Maekawa, 8720419 Non-human             |
| 42 | 1 Effect of th Handtrack, 17333097 Non-human          |
| 43 | 1 Effects of p Omogbai, E 15834453 Non-human          |
| 44 | 1 Effects of S Ott, IM; Alt 22900035 Non-human        |
| 45 | 1 Endotheliu Pruneau, D 8453977 Non-human             |
| 46 | 1 Hemodyna Abreu, Np; 18293204 Non-human              |
| 47 | 1 Hyperplast Pauletto, P 8156626 Non-human            |
| 48 | 1 Hypertensi Marley, Wæ 10567853 Non-human            |
| 49 | 1 Hypervoler Morgan, Tk 16796982 Non-human            |
| 50 | 1 Increased æ Turkstra, E; 10523346 Non-human         |
| 51 | 1 Inhibition c Wang, XM; 26883268 Non-human           |
| 52 |                                                       |
| 53 |                                                       |
| 54 |                                                       |
| 55 |                                                       |
| 56 |                                                       |
| 57 |                                                       |
| 58 |                                                       |
| 59 |                                                       |
| 60 |                                                       |



|    |                                                               |
|----|---------------------------------------------------------------|
| 1  |                                                               |
| 2  | 1 Gene Trapç Park, S; Liu, 22547438 Non-human                 |
| 3  | 1 Genetic-Co Kim, Hs; Kr 7708716 Non-human                    |
| 4  | 1 Human GRI Wang, Z; Zè 26667412 Non-human                    |
| 5  | 1 Identificati Bauer, Y; H 21357272 Non-human                 |
| 6  | 1 Knockdown Raison, D; C 23720345 Non-human                   |
| 7  | 1 Lack of an € Kittikulsuth 24431204 Non-human                |
| 8  | 1 Lack of in v Bonvini, JM 10966489 Non-human                 |
| 9  | 1 Loss of Not Ragot, H; M 27296994 Non-human                  |
| 10 | 1 Lysine-Speç Williams, JS 22534796 Non-human                 |
| 11 | 1 Macula Dei Lu, Y; Wei, 26647426 Non-human                   |
| 12 | 1 Mechanisr Todkar, A; I 25071088 Non-human                   |
| 13 | 1 mPGES-1 d Jia, ZJ; Liu, 22237797 Non-human                  |
| 14 | 1 Natriuretic Demerath, 24717731 Non-human                    |
| 15 | 1 Nephron-sç Ramkumar, 25995108 Non-human                     |
| 16 | 1 Nitric oxide Liang, MY; 10432402 Non-human                  |
| 17 | 1 NOS1-depe Hyndman, I 25391901 Non-human                     |
| 18 | 1 N-terminal Bodenstein 17220356 Non-human                    |
| 19 | 1 Organizatic Cabral, CM 12181335 Non-human                   |
| 20 | 1 Pathophysiolgarashi, K; 25252154 Non-human                  |
| 21 | 1 Physiologic Le, TH; Kim 12963678 Non-human                  |
| 22 | 1 Possible rol Ramkumar, NA Non-human                         |
| 23 | 1 Pressor anc Hirooka, Y; 8934360 Non-human                   |
| 24 | 1 Reciprocal Kurt, B; Kur 21209011 Non-human                  |
| 25 | 1 Regulation Tipsmark, C 12654889 Non-human                   |
| 26 | 1 Regulation Liu, JL; Zucl 10066676 Non-human                 |
| 27 | 1 Renal angic Stoneking, 9719278 Non-human                    |
| 28 | 1 Renal redo: Yogi, A; Me 18195161 Non-human                  |
| 29 | 1 Role of NO: Carlstrom, 18987286 Non-human                   |
| 30 | 1 Signal tran: Yousif, MH 16287213 Non-human                  |
| 31 | 1 Specific pre Bird, IM; M 9687288 Non-human                  |
| 32 | 1 Stimulatio Kurtz, A; Gç 9575895 Non-human                   |
| 33 | 1 Strain diffe Smit-van O 11984748 Non-human                  |
| 34 | 1 Thromboxa Sparks, MA 23150508 Non-human                     |
| 35 | 1 Vascular ar Muller, DN 9039087 Non-human                    |
| 36 | 1 A systemat Feng, X; Zh 23178513 Not a case-control study    |
| 37 | 1 ACE gene p Schena, FP; 11473656 Not a case-control study    |
| 38 | 1 Allergic rea Alencar, RC 20180980 Not a case-control study  |
| 39 | 1 Angiotensin Ng, D; Tai, I 15830182 Not a case-control study |
| 40 | 1 Antihypertç Kuznetsova 10918550 Not a case-control study    |
| 41 | 1 Association Huang, ZK; 26000752 Not a case-control study    |
| 42 | 1 Association Ding, W; W 21607620 Not a case-control study    |
| 43 | 1 Association Ji, LD; Zhan 20087216 Not a case-control study  |
| 44 | 1 Gastric-Car Straccapan 7726143 Not a case-control study     |
| 45 | 1 Weber-Chr Sterling, KA 23216240 Not a case-control study    |
| 46 | 1 Whole-Gen Cordell, HJ; 19959718 Not a case-control study    |
| 47 | 1 A Synergist Rodriguez-I 19546528 Not a case-control study   |
| 48 | 1 Association Zhou, TB; Y 23971628 Not a case-control study   |
| 49 | 1 CYP3A5 anç Bochud, M, 19290795 Not a case-control study     |
| 50 | 1 Diabetic ne Rogus, JJ; N 9461232 Not a case-control study   |
| 51 | 1 Disorders c Connell, JV 11469810 Not a case-control study   |
| 52 |                                                               |
| 53 |                                                               |
| 54 |                                                               |
| 55 |                                                               |
| 56 |                                                               |
| 57 |                                                               |
| 58 |                                                               |
| 59 |                                                               |
| 60 |                                                               |



1 Genetic de Schmidt, S; NA Not a case-control study  
 2 1 Genetics ar Marre, M 10097900 Not a case-control study  
 3 1 Genetics of Costerouss 9247746 Not a case-control study  
 4 1 HLA genes Griffith, ME 9493788 Not a case-control study  
 5 1 Improveme Matsunaga 19603250 Not a case-control study  
 6 1 Is the prese Ng, DPK; T 18523141 Not a case-control study  
 7 1 M235T ang Staessen, J. 10100088 Not a case-control study  
 8 1 microRNAs Marques, F 26663185 Not a case-control study  
 9 1 Mistyping c Ueda, S; He 8863184 Not a case-control study  
 10 1 Nonmodul Hollenberg 16672145 Not a case-control study  
 11 1 Normative Prasad, P; T 18027817 Not a case-control study  
 12 1 Partial Dele Nogueira, F 10737993 Not a case-control study  
 13 1 Risk of dev Savage, DA 10328465 Not a case-control study  
 14 1 The deletio Staessen, J. 9488209 Not a case-control study  
 15 1 The Phenoi Korner, PI 21208016 Not a case-control study  
 16 1 The renopr Locatelli, F; 10048500 Not a case-control study  
 17 1 Varicella-zc Velez, AMANA Not a case-control study  
 18 1 Add-on an Aggarwal, R 11380832 Not a case-control study  
 19 1 Analysis of Torres VE, C 22205355 Not a case-control study  
 20 1 Angiotensii Akcay, A; O 15013293 Not a case-control study  
 21 1 Angiotensii Narita, I; G 12911556 Not a case-control study  
 22 1 Angiotensii Hopkins, PI 11997278 Not a case-control study  
 23 1 Antiproteir Haneda, M 15364166 Not a case-control study  
 24 1 Association Pei, Y; Schc 9259580 Not a case-control study  
 25 1 Association Akcay, A; S 15385810 Not a case-control study  
 26 1 Contributio Wong, TYH 11431175 Not a case-control study  
 27 1 Gene Polyn Zhang, G; V 17984617 Not a case-control study  
 28 1 Impact of g Siekierka-H 19681973 Not a case-control study  
 29 1 Polymorph Frimat, L; P 11053482 Not a case-control study  
 30 1 Survival in i Padro-Miq 19014923 Not a case-control study  
 31 1 The role of Kelly TN, R 25906781 Not a case-control study  
 32 1 Major clinic Alderman, NA Not a case-control study  
 33 1 NHLBI Fam Williams, R 10964005 Not a case-control study  
 34 1 Germline g Audenet F, 23911636 Not a renal disease focus  
 35 1 Impact of n Pfab T, Stir 17563539 Not a renal disease focus  
 36 1 Insertion/D de Martino 21477733 Not a renal disease focus  
 37 1 Polymorph Deckers, IA 24978482 Not a renal disease focus  
 38 1 The angiot Ebert, MPA 16365022 Not a renal disease focus  
 39 1 Variants in Andreotti, i 20047954 Not a renal disease focus  
 40 1 alpha(1)-Ar Greene, DN 22215832 Not a renal disease focus  
 41 1 VASODILAT DUBEY, RK 8169847 Not a renal disease focus  
 42 1 2 NOVEL P (MORIYAM 8656071 Not a renal disease focus  
 43 1 A Computa Guillaud, F; 20683640 Not a renal disease focus  
 44 1 A new thec Eggers, AE 26243176 Not a renal disease focus  
 45 1 A Polymor Sugimoto, I 18936345 Not a renal disease focus  
 46 1 A study on Chmaisse F 19861867 Not a renal disease focus  
 47 1 ACE gene ir Dell'omo, C 16889537 Not a renal disease focus  
 48 1 Alanine : gl Danpure, C 12686111 Not a renal disease focus  
 49 1 alpha(1)-ar Callea, F; G 9279535 Not a renal disease focus  
 50 1 Alpha1-ant Taddei C, A 10563543 Not a renal disease focus



1  
2  
3  
4  
5  
6  
7  
8  
9  
10  
11  
12  
13  
14  
15  
16  
17  
18  
19  
20  
21  
22  
23  
24  
25  
26  
27  
28  
29  
30  
31  
32  
33  
34  
35  
36  
37  
38  
39  
40  
41  
42  
43  
44  
45  
46  
47  
48  
49  
50  
51  
52  
53  
54  
55  
56  
57  
58  
59  
60

1 Alpha-1-pr O'Donogh 8296629 Not a renal disease focus  
1 alpha-addu Clark, CJ; D 11116113 Not a renal disease focus  
1 Alternative Matamala, 26141700 Not a renal disease focus  
1 An Erythro|Schulz, EG; 21912181 Not a renal disease focus  
1 Analyses of Berge, KE; I 9298743 Not a renal disease focus  
1 ANCA-asso Morris, H; I 21821620 Not a renal disease focus  
1 Angiotensii Tassiulas, I 9710341 Not a renal disease focus  
1 Angiotensii Costerouss 9830503 Not a renal disease focus  
1 Angiotensii Vasku, A; S 9607178 Not a renal disease focus  
1 Angiotensii Sanderford 11009467 Not a renal disease focus  
1 Angiotensii Spaanderm 15350256 Not a renal disease focus  
1 Angiotensii Miller, JA; T 10969844 Not a renal disease focus  
1 ANGIOTEN:NAGI, DK; M 8582133 Not a renal disease focus  
1 Angiotensii Pedersen-E 19820429 Not a renal disease focus  
1 Angiotensii Stefansson 10855732 Not a renal disease focus  
1 Angiotensii Badr, S; Ral NA Not a renal disease focus  
1 Association Boomsma F 15830186 Not a renal disease focus  
1 Association Nalbantogl 23151617 Not a renal disease focus  
1 Association Song SB, Jir 21342026 Not a renal disease focus  
1 Association Assali, A; G 21570644 Not a renal disease focus  
1 Association Rabbani M. 18711292 Not a renal disease focus  
1 Association RodrÃ-gue; 11345362 Not a renal disease focus  
1 Association Singh, PP; M 16621107 Not a renal disease focus  
1 Association Mokretar, I 26670794 Not a renal disease focus  
1 Association Meng, N; Z 25359286 Not a renal disease focus  
1 Association Mayer, NJ; NA Not a renal disease focus  
1 Association Mashimo, Y 18398332 Not a renal disease focus  
1 Blunted cG Supaporn, S 8914042 Not a renal disease focus  
1 Blunted rer Hopkins, PI 8728297 Not a renal disease focus  
1 C-antineutr Griffith ME 8671812 Not a renal disease focus  
1 Clinical and Huang CC, H 26313793 Not a renal disease focus  
1 Compreher Kato, N; Su 10953993 Not a renal disease focus  
1 Compreher Monico CG 17460142 Not a renal disease focus  
1 Contributic Mondorf U 9524045 Not a renal disease focus  
1 Crystal stru Zhang, XX; 12899834 Not a renal disease focus  
1 CYP3A5 gei Fromm MF 16141800 Not a renal disease focus  
1 Deep-targe Pescatello, NA Not a renal disease focus  
1 Detection c Matsumoto 11106834 Not a renal disease focus  
1 Effect of AC Poduri, A; M 18200034 Not a renal disease focus  
1 Effects of a Kulah, E; D 17625392 Not a renal disease focus  
1 Effects of o Maeda, K; I 16678545 Not a renal disease focus  
1 Efficacy of I Kwon, DH; 23717118 Not a renal disease focus  
1 Elevated ur Clausen, P; 10872702 Not a renal disease focus  
1 Endothelial Page, A; Re 16093452 Not a renal disease focus  
1 ENHANCED NIELSEN, C 8393795 Not a renal disease focus  
1 Eprosartan Vase, H; La 18341678 Not a renal disease focus  
1 Evaluation Rumsby G, 15327387 Not a renal disease focus  
1 FREQUENC ZEE, RYL; B 7882587 Not a renal disease focus  
1 Functional Coto E, Pal; 20594303 Not a renal disease focus  
1 Functional Lumb MJ, L 10960483 Not a renal disease focus

1  
2 1 Functional Gainer, JV; 15611369 Not a renal disease focus  
3 1 Further stu Danpure CJ 3416563 Not a renal disease focus  
4 1 Genetic po Deuster, P/ 23543093 Not a renal disease focus  
5 1 Genetic po Wu, CK; Ts: 19330904 Not a renal disease focus  
6 1 Genetic po Olivieri, O; 10567188 Not a renal disease focus  
7 1 Genetic prε Tousoulis D 23479071 Not a renal disease focus  
8 1 Genetic rislvan Onna, I 15326089 Not a renal disease focus  
9 1 Genetic var Ichikawa, N 24549414 Not a renal disease focus  
10 1 Genetic var Hsu, CCC; E 16396964 Not a renal disease focus  
11 1 Genomic a: Turner ST, I 22566498 Not a renal disease focus  
12 1 Genotype-ı Watkins, W 19770777 Not a renal disease focus  
13 1 Genotypic i Mehri, S; K 20580725 Not a renal disease focus  
14 1 G-protein k Zagradisnik 15337465 Not a renal disease focus  
15 1 Identificati Purdue PE, 1703535 Not a renal disease focus  
16 1 Increased ε Yamani, MI 17097490 Not a renal disease focus  
17 1 Independeı Morris, Bj; 8104754 Not a renal disease focus  
18 1 Inhibition c Montgome 9797175 Not a renal disease focus  
19 1 Interaction Bruning TA 7866595 Not a renal disease focus  
20 1 Is the influε Muthumala 17624939 Not a renal disease focus  
21 1 Lack of assı Kato, N; Su 9495254 Not a renal disease focus  
22 1 Low-salt diı Manunta, F 14684671 Not a renal disease focus  
23 1 Lys(173)Arı Komiya I, Y 10720581 Not a renal disease focus  
24 1 Middle cerı Thomas, GI 12865608 Not a renal disease focus  
25 1 Molecular ı Corvol, P; S 9296068 Not a renal disease focus  
26 1 Molecular- Krieger, Je; NA Not a renal disease focus  
27 1 Mutation-k Coulter-Ma 18282470 Not a renal disease focus  
28 1 No associat Wolf, G; Pa 12147803 Not a renal disease focus  
29 1 No associat Ishikawa, K 9607391 Not a renal disease focus  
30 1 No Evidenc Liktor, B; C: 23370555 Not a renal disease focus  
31 1 Overexpres Coulter-Ma 15802217 Not a renal disease focus  
32 1 Oxidative s Cal<sup>Å</sup>2 LA, P: 12897089 Not a renal disease focus  
33 1 Peripheral ı Thomas, GI 14632699 Not a renal disease focus  
34 1 Pharmacolı Miyata N, S 25237136 Not a renal disease focus  
35 1 Phenotype Gong L, Chı 24474657 Not a renal disease focus  
36 1 Polymorph Baudin, B 15640279 Not a renal disease focus  
37 1 Polymorph Bofinger, A 11317203 Not a renal disease focus  
38 1 Potential B Grisk, O 23852615 Not a renal disease focus  
39 1 Rab1 Small Zhuang, XL 20861236 Not a renal disease focus  
40 1 Renal chan Marre, M; I 10082486 Not a renal disease focus  
41 1 Renal haen Skov, K; Mı 17083073 Not a renal disease focus  
42 1 Renin-aldo: Hanukoglu, 18634878 Not a renal disease focus  
43 1 Renin-angiı BuraczyÅ,,s 14502296 Not a renal disease focus  
44 1 Renin-Angi Joyce-Tan, NA Not a renal disease focus  
45 1 Risk given k Li, Q; Sun, I 26391364 Not a renal disease focus  
46 1 Role of ACE Cordonnier 11708761 Not a renal disease focus  
47 1 Role of GRı Chen, K; Fu 24218433 Not a renal disease focus  
48 1 Serum liver Larizza, D; I 10664223 Not a renal disease focus  
49 1 Single nuclı Demir AK, I 27936341 Not a renal disease focus  
50 1 Single Strar Bettinaglio, 12270765 Not a renal disease focus  
51 1 SNP Varian Coulter-Ma 25854853 Not a renal disease focus  
52  
53  
54  
55  
56  
57  
58  
59  
60

|    |                                                                        |
|----|------------------------------------------------------------------------|
| 1  |                                                                        |
| 2  | 1 Somatic Vo Gilcrease, M 8522307 Not a renal disease focus            |
| 3  | 1 The consen Mesa-Torre 24957194 Not a renal disease focus             |
| 4  | 1 The genetic Stanczuk, C 17653872 Not a renal disease focus           |
| 5  | 1 The interac Gatti, RR; S 22791701 Not a renal disease focus          |
| 6  | 1 The M235T van den Bo 17921816 Not a renal disease focus              |
| 7  | 1 The major : Coulter-Ma 15963748 Not a renal disease focus            |
| 8  | 1 The presen GÃ¼ngÃ¼r 21332339 Not a renal disease focus               |
| 9  | 1 The state a Price, DA; C 10232494 Not a renal disease focus          |
| 10 | 1 Ubiquitin li Shen Y, Bal 16979136 Not a renal disease focus          |
| 11 | 1 Vitamin B6 Hoyer-Kuhn 24385516 Not a renal disease focus             |
| 12 | 1 [A study on Nishina M. 9014479 Not written in English or Spanish     |
| 13 | 1 [AGTR1 A1: Yin X, Li H, 23505107 Not written in English or Spanish   |
| 14 | 1 [Arterial hy Ermolenko 7700 Not written in English or Spanish        |
| 15 | 1 [Associatio Xue Y, Cher 11798574 Not written in English or Spanish   |
| 16 | 1 [Associatio BuraczyÅ„s 12476891 Not written in English or Spanish    |
| 17 | 1 [Effect of e Kaliuzhin V 24261234 Not written in English or Spanish  |
| 18 | 1 [Genetic pr Bzoma B, D 19112833 Not written in English or Spanish    |
| 19 | 1 [Identificat Savost'ianc 12500539 Not written in English or Spanish  |
| 20 | 1 [Is Pstl poly Grzeszczak 9499204 Not written in English or Spanish   |
| 21 | 1 [Pharmacol Mormol' IA 25286611 Not written in English or Spanish     |
| 22 | 1 [Polymorph Chistiakov I 10576062 Not written in English or Spanish   |
| 23 | 1 [Polymorph Kutyrina IM 10420452 Not written in English or Spanish    |
| 24 | 1 [Relationsh Moleda P, I 17941464 Not written in English or Spanish   |
| 25 | 1 [Relationsh Liao L, Lei M 12016801 Not written in English or Spanish |
| 26 | 1 [Relationsh Wang J, Zhi 10514536 Not written in English or Spanish   |
| 27 | 1 [Renin-angi BuraczyÅ„s 11865575 Not written in English or Spanish    |
| 28 | 1 A-20C angi Nakanishi, 14648325 Paediatric Individuals                |
| 29 | 1 ACE and AT Kostic, M; S 15179569 Paediatric Individuals              |
| 30 | 1 ACE gene p Tanaka, R; I 9590186 Paediatric Individuals               |
| 31 | 1 ACE gene p Fahmy, ME 18792483 Paediatric Individuals                 |
| 32 | 1 Angiotensii Pavlovic, M 9950302 Paediatric Individuals               |
| 33 | 1 Angiotensii Pavlovic, M 9354852 Paediatric Individuals               |
| 34 | 1 Angiotensii Siomou, E; 17515833 Paediatric Individuals               |
| 35 | 1 Angiotensii Rigoli, L; Ch 15470205 Paediatric Individuals            |
| 36 | 1 Angiotensii Gallego, P- 18413222 Paediatric Individuals              |
| 37 | 1 Donor and Buscher, R; 21309964 Paediatric Individuals                |
| 38 | 1 Effects of g Tabel, Y; Be 16525944 Paediatric Individuals            |
| 39 | 1 Gene Polyn Kaplan, I; S 25262176 Paediatric Individuals              |
| 40 | 1 Genetic coi Yim, HE; Ba 17597658 Paediatric Individuals              |
| 41 | 1 Genetic po Elshamaa, I 21859496 Paediatric Individuals               |
| 42 | 1 Genetic po Frishberg, 9853248 Paediatric Individuals                 |
| 43 | 1 Impact of c Hussein, A; 25939993 Paediatric Individuals              |
| 44 | 1 Polymorph Maruyama, 11354780 Paediatric Individuals                  |
| 45 | 1 Polymorph Ece, A; Tek 16109085 Paediatric Individuals                |
| 46 | 1 Renin-angi Papp, F; Fri 12579405 Paediatric Individuals              |
| 47 | 1 Renin-angi Liu, DS; Lu, NA Paediatric Individuals                    |
| 48 | 1 ACE gene p Haszon, I; F 12478352 Paediatric Individuals              |
| 49 | 1 Angiotensii Hohenfelln 10353402 Paediatric Individuals               |
| 50 | 1 Implication Hahn, H; Kt 16133060 Paediatric Individuals              |
| 51 | 1 Renin-angi Pardo, R; N 12579398 Paediatric Individuals               |
| 52 |                                                                        |
| 53 |                                                                        |
| 54 |                                                                        |
| 55 |                                                                        |
| 56 |                                                                        |
| 57 |                                                                        |
| 58 |                                                                        |
| 59 |                                                                        |
| 60 |                                                                        |

|    |                                                                      |
|----|----------------------------------------------------------------------|
| 1  |                                                                      |
| 2  | 1 Renin-angi Liu, KP; Lin, 15045574 Paediatric Individuals           |
| 3  | 1 Autosomal Geller, DS; 16611713 Paediatric Individuals              |
| 4  | 1 Genetic po Yim, HE; Ju 14764974 Paediatric Individuals             |
| 5  | 1 Genetic risl Taranta, A; 19110485 Paediatric Individuals           |
| 6  | 1 Hemorrhag Levin M, Pi 2783733 Paediatric Individuals               |
| 7  | 1 Identificati Forino, M; 14673707 Paediatric Individuals            |
| 8  | 1 Implication Ozen S, Ali 10401028 Paediatric Individuals            |
| 9  | 1 Low renin- Peruzzi, L; I 16006956 Paediatric Individuals           |
| 10 | 1 Posterior u Bajpai, M; I 15643266 Paediatric Individuals           |
| 11 | 1 Renal tubul Lacoste M, 16790508 Paediatric Individuals             |
| 12 | 1 Renin-angi Ozkaya, O; 16521052 Paediatric Individuals              |
| 13 | 1 The juxtagl Taugner R, 3128915 Paediatric Individuals              |
| 14 | 1 Variants of Halkas, AC; 9475086 Paediatric Individuals             |
| 15 | 1 ACE gene p Parving, H 18199798 Pharmaceutical drug focus           |
| 16 | 1 Angiotensii Cambien, F 9519756 Pharmaceutical drug focus           |
| 17 | 1 Association Kuriyama, S 11675943 Pharmaceutical drug focus         |
| 18 | 1 CYP2C9 ger Joy MS, Do 19669737 Pharmaceutical drug focus           |
| 19 | 1 Effects of lc Argani, H; C 18261537 Pharmaceutical drug focus      |
| 20 | 1 Efficacy an Axelsson, A 25533774 Pharmaceutical drug focus         |
| 21 | 1 Enalapril ar Rashtchiza 17222813 Pharmaceutical drug focus         |
| 22 | 1 Exaggerate Simonsen, . 21749320 Pharmaceutical drug focus          |
| 23 | 1 High serum Elung-Jense 11881130 Pharmaceutical drug focus          |
| 24 | 1 Long-term Andersen S 12716812 Pharmaceutical drug focus            |
| 25 | 1 Losartan de Campistol, 10432413 Pharmaceutical drug focus          |
| 26 | 1 Renin-angi Noroozian 17524880 Pharmaceutical drug focus            |
| 27 | 1 Randomize Amara, AB; 20061926 Pharmaceutical drug focus            |
| 28 | 1 Renal impli Hollenberg 11459212 Pharmaceutical drug focus          |
| 29 | 1 The influen Goyache-G 24241364 Pharmaceutical drug focus           |
| 30 | 1 The influen Luik, PT; H 12856080 Pharmaceutical drug focus         |
| 31 | 2 U.K. Prosp  Dudley CR, 8587251 No data                             |
| 32 | 2 The renin-- Ong-Ajyoot 10511770 No data                            |
| 33 | 2 The relatio Shestakova WOS:0002 No data                            |
| 34 | 2 Relationshi Wang, JJ; Z 11717948 No data                           |
| 35 | 2 Polymorph Chistyakov, WOS:0000 No data                             |
| 36 | 2 Polymorph Woo, KT; L; 15504143 No data                             |
| 37 | 2 Lack of ass Wong, TYH 10352194 No data                             |
| 38 | 2 Influence o Bantis, C; K 15031629 No data                          |
| 39 | 2 Genetic po Buraczyński 12898858 No data                            |
| 40 | 2 Effects of tl Luther Y, B; 14610337 No data                        |
| 41 | 2 Combinatic Osawa 17143591 No data                                  |
| 42 | 2 Renin-angi Mtiraoui, N 21421655 Incorrect patient group            |
| 43 | 2 Angiotensii Gutierrez 9258285 No data                              |
| 44 | 3 ACE varian Ahluwalia T 19108684 < 3 populations reported per SNP   |
| 45 | 3 Analysis of Anbazhaga 19520069 < 3 populations reported per SNP    |
| 46 | 3 Angiotensii Lee KB et a 12950120 < 3 populations reported per SNP  |
| 47 | 3 Angiotensii Reis KA et a 16228848 < 3 populations reported per SNP |
| 48 | 3 Angiotensii Gnanasaml 26482465 < 3 populations reported per SNP    |
| 49 | 3 Association Pawlik M e 23681285 < 3 populations reported per SNP   |
| 50 | 3 Association Pei Y et al. 9259580 < 3 populations reported per SNP  |
| 51 | 3 Chronic rer Prasad P et 16672053 < 3 populations reported per SNP  |
| 52 |                                                                      |
| 53 |                                                                      |
| 54 |                                                                      |
| 55 |                                                                      |
| 56 |                                                                      |
| 57 |                                                                      |
| 58 |                                                                      |
| 59 |                                                                      |
| 60 |                                                                      |

3 Contributic Marre M et 9120002 < 3 populations reported per SNP  
3 Gene polyn Su SL et al. 22147663 < 3 populations reported per SNP  
3 Genes invo Litovkina O 24727057 < 3 populations reported per SNP  
3 Genetic po Miura J et 10499884 < 3 populations reported per SNP  
3 Genetic po Zsom M et 22111818 < 3 populations reported per SNP  
3 Genetic po Fabris B et 15662219 < 3 populations reported per SNP  
3 Genetic var Shaikh R et 24737640 < 3 populations reported per SNP  
3 Hypertensi El-Essawy A 11926202 < 3 populations reported per SNP  
3 Interaction Stratta P et 14767013 < 3 populations reported per SNP  
3 M235T Pol Sarkar S et 25660845 < 3 populations reported per SNP  
3 Polymorph Ayed K et a 16635753 < 3 populations reported per SNP  
3 Polymorph Sprovieri SI 15934435 < 3 populations reported per SNP  
3 Renin-angi Parsa A et 15789057 < 3 populations reported per SNP  
3 Renin-angi Mtiraoui N 21421655 < 3 populations reported per SNP  
3 Renin-angi Chen WJ et 24907556 < 3 populations reported per SNP

## Supplementary Table S3d

| Exclusion S | Title        | Authors                 | PMID     | Reason                      |
|-------------|--------------|-------------------------|----------|-----------------------------|
| 1           | Identificati | Chen, Z; W              | 27756246 | Gene expression based study |
| 1           | Polymorph    | Liu, ZH; Li, LS         |          | No data for AGTR1           |
| 1           | The effect   | (Nakayama               | 16312263 | No data for AGTR1           |
| 1           | The genetic  | Heringer-W              | 22652430 | Non-human                   |
| 1           | Angiotensi   | Maeda A, T              | 23902639 | Non-human                   |
| 1           | Cardiac phe  | van Esch, JI            | 20071356 | Non-human                   |
| 1           | CCN1 expr    | Bonda, TA;              | 23690222 | Non-human                   |
| 1           | Human GRI    | Wang, Z; Z              | 26667412 | Non-human                   |
| 1           | Losartan ar  | Srisawat, U             | 25947921 | Non-human                   |
| 1           | The angiot   | Hunley, TE;             | 10652034 | Non-human                   |
| 1           | Mechanisr    | Todkar, A; I            | 25071088 | Non-human                   |
| 1           | Physiologic  | Le, TH; Kim             | 12963678 | Non-human                   |
| 1           | Specific pr  | Bird, IM; M             | 9687288  | Non-human                   |
| 1           | A systemat   | Feng, X; Zh             | 23178513 | Not a case-control study    |
| 1           | Associatio   | Ding, W; W              | 21607620 | Not a case-control study    |
| 1           | Associatio   | Zhou, TB; Y             | 23971628 | Not a case-control study    |
| 1           | Genetic de   | Cardinal-Fe             | 22436318 | Not a case-control study    |
| 1           | A Synergist  | Rodriguez-I             | 19546528 | Not a case-control study    |
| 1           | Add-on an    | Agarwal, R              | 11380832 | Not a case-control study    |
| 1           | Analysis of  | Torres VE, (            | 22205355 | Not a case-control study    |
| 1           | Angiotensi   | Woo KT, La              | 18536822 | Not a case-control study    |
| 1           | Associatio   | Akçay A, Se             | 15385810 | Not a case-control study    |
| 1           | Gene Polyn   | Zhang, G; V             | 17984617 | Not a case-control study    |
| 1           | Impact of g  | Siekierka-H             | 19681973 | Not a case-control study    |
| 1           | Influence o  | Bantis, C; I            | 15031629 | Not a case-control study    |
| 1           | Polymorph    | Frimat, L; P            | 11053482 | Not a case-control study    |
| 1           | Survival in  | Padro-Miqu              | 19014923 | Not a case-control study    |
| 1           | Angiotensi   | Miller, JA; T           | 10969844 | Not a renal disease focus   |
| 1           | Associatio   | Song SB, Jir            | 21342026 | Not a renal disease focus   |
| 1           | Associatio   | Assali, A; G            | 21570644 | Not a renal disease focus   |
| 1           | Eprosartan   | Vase, H; La             | 18341678 | Not a renal disease focus   |
| 1           | Functional   | Coto E, Pak             | 20594303 | Not a renal disease focus   |
| 1           | Genetic po   | Wu, CK; Ts              | 19330904 | Not a renal disease focus   |
| 1           | Genetic ris  | van Onna, I             | 15326089 | Not a renal disease focus   |
| 1           | Genetic var  | Ichikawa, M             | 24549414 | Not a renal disease focus   |
| 1           | Genetic var  | Hsu, CCC; E             | 16396964 | Not a renal disease focus   |
| 1           | Genomic a    | Turner ST, I            | 22566498 | Not a renal disease focus   |
| 1           | Increased    | Yamani, MI              | 17097490 | Not a renal disease focus   |
| 1           | Peripheral   | Thomas, GI              | 14632699 | Not a renal disease focus   |
| 1           | Polymorph    | Deckers, IA             | 24978482 | Not a renal disease focus   |
| 1           | Polymorph    | Bofinger, A             | 11317203 | Not a renal disease focus   |
| 1           | Renin-angi   | BuraczyÅ,,s             | 14502296 | Not a renal disease focus   |
| 1           | Renin-Angi   | Joyce-Tan, SM; Zain, SI |          | Not a renal disease focus   |
| 1           | Single nucl  | Demir AK, I             | 27936341 | Not a renal disease focus   |
| 1           | The M235T    | van den Bo              | 17921816 | Not a renal disease focus   |



|    |                                                                             |
|----|-----------------------------------------------------------------------------|
| 1  |                                                                             |
| 2  | 1 Angiotensin Sparks, MA 21242463 Not a renal disease focus                 |
| 3  | 1 Association Conen D, G 18698212 Not a renal disease focus                 |
| 4  | 1 Comprehensive Kato, N; Su 10953993 Not a renal disease focus              |
| 5  | 1 Deep-target Pescatello, LS; Schifano Not a renal disease focus            |
| 6  | 1 Genetic Clu Krcunovic, Z; Novakovi Not a renal disease focus              |
| 7  | 1 Polymorph Baudin, B 15640279 Not a renal disease focus                    |
| 8  | 1 Renin-angiotensin Lau YK, Wo 15153745 Not a renal disease focus           |
| 9  | 1 [AGTR1 A1: Yin X, Li H, 23505107 Not written in English or Spanish        |
| 10 | 1 [Association Buraczyńska 12476891 Not written in English or Spanish       |
| 11 | 1 [Effect of e Kaliuzhin V 24261234 Not written in English or Spanish       |
| 12 | 1 [Genetic polymorph Bzoma B, D 19112833 Not written in English or Spanish  |
| 13 | 1 [Identification Savost'ianov 12500539 Not written in English or Spanish   |
| 14 | 1 [Pharmacokinetic Mormol' IA 25286611 Not written in English or Spanish    |
| 15 | 1 [Polymorph Chistiakov I 10576062 Not written in English or Spanish        |
| 16 | 1 [Renin-angiotensin Buraczyńska 11865575 Not written in English or Spanish |
| 17 | 1 ACE gene polymorph Haszon, I; F 12478352 Paediatric Individuals           |
| 18 | 1 Renin-angiotensin Papp, F; Fri 12579405 Paediatric Individuals            |
| 19 | 1 ACE and AT1 Kostic, M; S 15179569 Paediatric Individuals                  |
| 20 | 1 Angiotensin Hohenfellner 10353402 Paediatric Individuals                  |
| 21 | 1 Angiotensin Gallego, P 18413222 Paediatric Individuals                    |
| 22 | 1 Donor and Buscher, R; 21309964 Paediatric Individuals                     |
| 23 | 1 Effects of g Tabel Y, Be 16525944 Paediatric Individuals                  |
| 24 | 1 Genetic polymorph Yim, HE; Ju 14764974 Paediatric Individuals             |
| 25 | 1 Genetic polymorph Elshamaa, I 21859496 Paediatric Individuals             |
| 26 | 1 Genetic polymorph Frishberg, N 9853248 Paediatric Individuals             |
| 27 | 1 Genetic risk Taranta, A; 19110485 Paediatric Individuals                  |
| 28 | 1 Impact of c Hussein, A; 25939993 Paediatric Individuals                   |
| 29 | 1 Polymorph Maruyama 11354780 Paediatric Individuals                        |
| 30 | 1 Polymorph Ece, A; Tekin 16109085 Paediatric Individuals                   |
| 31 | 1 Renin-angiotensin Pardo, R; N 12579398 Paediatric Individuals             |
| 32 | 1 Renin-angiotensin Liu, KP; Lin, 15045574 Paediatric Individuals           |
| 33 | 1 Implication Ozen S, Ali 10401028 Paediatric Individuals                   |
| 34 | 1 Mapping c Weber, S; L 20605837 Paediatric Individuals                     |
| 35 | 1 Renin-angiotensin Ozkaya, O; 16521052 Paediatric Individuals              |
| 36 | 1 Effect of ACE inhibitor Angler CA, 16961167 Pharmaceutical drug focus     |
| 37 | 1 Chronic renal Prasad P, T 16672053 Pharmaceutical drug focus              |
| 38 | 1 CYP2C9 genotype Joy MS, Do 19669737 Pharmaceutical drug focus             |
| 39 | 1 Enalapril and Rashtchizade 17222813 Pharmaceutical drug focus             |
| 40 | 1 Evaluation Palmer, ND 24551085 Pharmaceutical drug focus                  |
| 41 | 1 Long-term Andersen S 12716812 Pharmaceutical drug focus                   |
| 42 | 1 The influence Goyache-G 24241364 Pharmaceutical drug focus                |
| 43 | 1 Genetic polymorph Buraczyńska 12898858 Pharmaceutical drug focus          |
| 44 | 1 Genotypic polymorph Mehri, S; K 20580725 Pharmaceutical drug focus        |
| 45 | 2 A polymorph Möllsten A, 21316998 Incorrect patient group                  |
| 46 | 2 Association Yoshida T, I 19056482 Overlap in patient group                |
| 47 | 2 Combinatorial Osawa N, K 17143591 No data                                 |
| 48 | 2 Effects of thalidomide Luther Y, B; 14610337 No data                      |
| 49 |                                                                             |
| 50 |                                                                             |
| 51 |                                                                             |
| 52 |                                                                             |
| 53 |                                                                             |
| 54 |                                                                             |
| 55 |                                                                             |
| 56 |                                                                             |
| 57 |                                                                             |
| 58 |                                                                             |
| 59 |                                                                             |



1  
2 Gene polyn Su, SL; Lu, H 22147663 Overlap in patient group  
3 Lack of syn Tarnow L, H 10907125 No data  
4 Polymorph Woo, KT; Li 15504143 Overlap in patient group  
5 The renin-- Ong-Ajyoot 10511770 No data  
6 Polymorph Ayed K et al 16635753 < 3 populations reported per SNP  
7 Angiotensin Buraczynski 12187084 < 3 populations reported per SNP  
8 Genetic po Buraczynski 16384824 < 3 populations reported per SNP  
9 Renin-angi Chen WJ et al 24907556 < 3 populations reported per SNP  
10 Hypertensi El-Essawy / WOS:0001 < 3 populations reported per SNP  
11 Genetic po Fabris B et al 15662219 < 3 populations reported per SNP  
12 Relationshi Fradin S et al 11938025 < 3 populations reported per SNP  
13 Susceptibili Hanna MO 25316403 < 3 populations reported per SNP  
14 Renin-angi Kawada N et al WOS:0000 < 3 populations reported per SNP  
15 GENETIC CI Krcunovic Z WOS:0002 < 3 populations reported per SNP  
16 Angiotensin Lee KB et al 12950120 < 3 populations reported per SNP  
17 Genes invo Litovkina O 24727057 < 3 populations reported per SNP  
18 Polymorph Losito A et al WOS:0001 < 3 populations reported per SNP  
19 Contributic Marre M et al 9120002 < 3 populations reported per SNP  
20 Associati Pei Y et al 9259580 < 3 populations reported per SNP  
21 Polymorph Sprovieri SI 15934435 < 3 populations reported per SNP  
22 Interaction Stratta P et al 14767013 < 3 populations reported per SNP  
23 Gene polyn Su SL et al. 22147663 < 3 populations reported per SNP  
24 Gene-Gene Su SL et al. 24977181 < 3 populations reported per SNP  
25 Associati Yoshida T et al 19406964 < 3 populations reported per SNP  
26 Genetic po Zsom M et al 22111818 < 3 populations reported per SNP  
27  
28  
29  
30  
31  
32  
33  
34  
35  
36  
37  
38  
39  
40  
41  
42  
43  
44  
45  
46  
47  
48  
49  
50  
51  
52  
53  
54  
55  
56  
57  
58  
59  
60

## Supplementary Table S3e

| Exclusion | Title        | Authors      | PMID     | Reason                            |
|-----------|--------------|--------------|----------|-----------------------------------|
| 1         | Associator   | Pei Y, Scho  | 9259580  | No data for AGTR2                 |
| 1         | Synergistic  | Doria A, Or  | 9389421  | No data for AGTR2                 |
| 1         | Lack of syn  | Tarnow L, I  | 10907125 | No data for AGTR2                 |
| 1         | Angiotensi   | Miller JA, T | 10969844 | No data for AGTR2                 |
| 1         | Polymorph    | Frimat L, P  | 11053482 | No data for AGTR2                 |
| 1         | Altered re   | O'Tierney,   | 18192845 | No data for AGTR2                 |
| 1         | The angiot   | Hunley, TE   | 10652034 | Non-human                         |
| 1         | Renin-angi   | Pardo, R; N  | 12579398 | Not a case-control study          |
| 1         | Associator   | Akcaay A, S  | 15385810 | Not a case-control study          |
| 1         | Whole-gen    | Cordell HJ,  | 19959718 | Not a case-control study          |
| 1         | Associator   | Laksmi NK,   | 20149750 | Not a case-control study          |
| 1         | Angiotensi   | Hohenfeln    | 10353402 | Not a renal disease focus         |
| 1         | Angiotensi   | Yoneda, A;   | 12187255 | Not a renal disease focus         |
| 1         | Genetic po   | Yim, HE; Ju  | 14764974 | Not a renal disease focus         |
| 1         | Polymorph    | Baudin, B    | 15640279 | Not a renal disease focus         |
| 1         | No evidenc   | Struwe E, I  | 16944335 | Not a renal disease focus         |
| 1         | [Effect of e | Kaliuzhin V  | 24261234 | Not written in English or Spanish |
| 1         | No evidenc   | Hiraoka M,   | 11260384 | Paediatric Individuals            |
| 1         | Polymorph    | Maruyama     | 11354780 | Paediatric Individuals            |
| 1         | Angiotensi   | Rigoli L, Ch | 15470205 | Paediatric Individuals            |
| 1         | Implicator   | Hahn H, Kl   | 16133060 | Paediatric Individuals            |
| 1         | Angiotensi   | Siomou, E;   | 17515833 | Paediatric Individuals            |
| 1         | Associator   | Miranda D    | 24995698 | Paediatric Individuals            |
| 2         | Angiotensi   | Pedersen-I   | 19820429 | Incorrect patient group           |

## Supplementary Table S3f

| Exclusion S Title                              | Authors                             | PMID     | Reason                |
|------------------------------------------------|-------------------------------------|----------|-----------------------|
| 1 Increased amount of the angiotensin          | Suehiro T, Morita T, Inoue T        | 15164285 | Gene expression based |
| 1 Increased expression of monocyte             | Ulrich, C; Heine, GH; Garcia        | 16476718 | Gene expression based |
| 1 Synergistic expression of angiotensin        | Wakahara, S; Konoshita, T;          | 17303661 | Gene expression based |
| 1 A biallelic gene polymorphism of CYP11B2     | Nicod J, Bruhin D, Auer L, V        | 12788845 | No data for REN       |
| 1 A candidate gene approach to gene            | Yamamoto, R; Nagasawa, Y            | 21737517 | No data for REN       |
| 1 A polymorphism in the angiotensin            | Mollsten, A; Vionnet, N; For        | 21316998 | No data for REN       |
| 1 ACAC1 gene (rs2268388) and AGTR              | Shah VN, Cheema BS, Sharr           | 23081748 | No data for REN       |
| 1 ACE variants interact with the RAS           | Ahluwalia TS, Ahuja M, Rai          | 19108684 | No data for REN       |
| 1 ACE, PAI-1, decorin and Warner               | Del Cosmo, S; Margaglione,          | 10495473 | No data for REN       |
| 1 Aldosterone synthase (CYP11B2)-3'UTR         | Lajer, M; Schjoedt, KJ; Jaco        | 16759311 | No data for REN       |
| 1 Aldosterone Synthase CYP11B2                 | Ger Yilmaz, M; Sari, I; Bagci, B; C | 25957425 | No data for REN       |
| 1 Analysis of insertion/deletion polymorphisms | Ali A, Vasudevan R, Ismail P        | 21421653 | No data for REN       |
| 1 Analysis of polymorphism in Renin            | Anbazhagan, K; Sampathku            | 19520069 | No data for REN       |
| 1 Angiotensin converting enzyme gene           | Yildiz A, Yazici H, Cine N, Ka      | 12832741 | No data for REN       |
| 1 Angiotensin I converting enzyme gene         | Gutierrez, C; Vendrell, J; Pa       | 9258285  | No data for REN       |
| 1 Angiotensin I converting enzyme gene         | Schmidt, S; Ritz, E                 | 9269698  | No data for REN       |
| 1 Angiotensin II type 1 receptor (AT1R)        | El-Banawy, H; Bedair, R; Mc         | NA       | No data for REN       |
| 1 Angiotensin II type 1 receptor gene          | Buraczynska, M; Ksiazek, P;         | 12187084 | No data for REN       |
| 1 Angiotensin-converting enzyme (ACE)          | So, WY; Ma, RCW; Ozaki, R;          | 16395257 | No data for REN       |
| 1 Angiotensin-converting enzyme polymorphism   | Ortiz, MA; De Prado, A; Dor         | 15012717 | No data for REN       |
| 1 Angiotensin-I converting enzyme gene         | Ergen, HA; Hatemi, H; Agac          | NA       | No data for REN       |
| 1 Angiotensin-II type 1 receptor gene          | Tarnow L, Cambien F, Rossi          | 8671962  | No data for REN       |
| 1 Angiotensinogen gene polymorphism            | Gnanasambandan, R; Elum             | 26482465 | No data for REN       |
| 1 Angiotensinogen M235T and chymotrypsin       | Zychma, MJ; Zukowska-Szco           | 11096141 | No data for REN       |
| 1 Apparent Mineralocorticoid Excess            | Alzahrani, AS; Aljuhani, N; C       | 24936560 | No data for REN       |
| 1 Assessment of matrix Gla protein, Klotho     | Karsli Ceppio, Ylu S, Yurdun        | 21859400 | No data for REN       |
| 1 Association analysis of ADPRT1, AKI          | Prasad, P; Tiwari, AK; Kuma         | 20353610 | No data for REN       |
| 1 Association between angiotensin converting   | enzyme Uemasu, J; Nakaoka, A; Kav   | 9180368  | No data for REN       |
| 1 Association between CCDC132, FDX1            | Niu D, Ren Y, Xie L, Sun J, Lu      | 26370181 | No data for REN       |
| 1 Association of aldosterone synthase          | Pawlik M, Mostowska A, Lia          | 23681285 | No data for REN       |
| 1 Association of apolipoprotein E gene         | Lahrach H, Essiarab F, Timir        | 25155022 | No data for REN       |
| 1 Association of glutathione S-transferase     | Datta SK, Kumar V, Pathak I         | 20954980 | No data for REN       |
| 1 Association of plasminogen activator         | Xu F, Liu H, Sun Y.                 | 26616527 | No data for REN       |
| 1 Association of sequence polymorphisms        | Bai Y, Guo Z, Xu J, Zhang J, C      | 24576051 | No data for REN       |
| 1 Association of the angiotensinogen           | Reis KA, Ebin, FA, Ko, E,           | 21500980 | No data for REN       |
| 1 Association of the genetic polymorphisms     | Li, X; An, J; Guo, R; Jin, Z; Li,   | 20540812 | No data for REN       |
| 1 Association studies between the HSD17B4      | Lavery, GG; McTernan, CL; I         | 11916625 | No data for REN       |
| 1 Association study of ACE polymorphisms       | Gong, AM; Li, XY; Wang, YQ          | 22729880 | No data for REN       |
| 1 Associations between apolipoprotein E        | Arikan H, Koc M, Sari H, Tuğ        | 17763167 | No data for REN       |
| 1 CYP11B2-RFLP profiles for serum angiotensin  | Ozdemir O, Kayatas M, Ceti          | 25394530 | No data for REN       |
| 1 Blood Pressure-Related Genes and             | Kim, SM; Chin, HJ; Oh, YK; K        | 19729965 | No data for REN       |
| 1 Circulating angiotensin-converting enzyme    | Anguiano, L; Riera, M; Pasc         | 25813276 | No data for REN       |
| 1 Clinical impact of an angiotensin II         | Amorim, CEN; Nogueira, E;           | 23362199 | No data for REN       |
| 1 Combinational effect of genes for            | Osawa, N; Koya, D; Araki, S;        | 17143591 | No data for REN       |
| 1 Different Mechanisms for the Progression     | Nakayama, Y; Nonoguchi, H           | 19293592 | No data for REN       |

|    |   |                                                                                        |                                                          |
|----|---|----------------------------------------------------------------------------------------|----------------------------------------------------------|
| 1  |   |                                                                                        |                                                          |
| 2  | 1 | Distribution of ACE I/D Polymorphisms                                                  | Shaikh, R; Shahid, SM; Naw NA No data for REN            |
| 3  | 1 | DNA polymorphisms in the ACE gene                                                      | Freire, MBS; van Dijk, DJ; Er 9794558 No data for REN    |
| 4  | 1 | DNA repair genes XPD and XRCC1                                                         | p Radwan WM, Elbarbary HS, 25310768 No data for REN      |
| 5  | 1 | Effect of ACE gene on diabetic nephropathy                                             | Kuramoto, N; Iizuka, T; Ito, 10023638 No data for REN    |
| 6  | 1 | Effect of IL-6 C-572G polymorphism                                                     | Chen SY, Chen CH, Huang Y 20954977 No data for REN       |
| 7  | 1 | Effects of erythropoietin, angiotensin II                                              | Glicklich, D; Kapoian, T; Miao 10428268 No data for REN  |
| 8  | 1 | Effects of the genetic polymorphisms                                                   | Luther, Y; Bantis, C; Ivens, K 14610337 No data for REN  |
| 9  | 1 | Endothelial nitric oxide synthase gene                                                 | Cherney, DZI; Scholey, JW; 19037250 No data for REN      |
| 10 | 1 | Factors affecting progression of renal disease                                         | Locatelli, F; Manzoni, C; Ma 9387138 No data for REN     |
| 11 | 1 | Familial renal glucosuria: SLC5A2 mutation                                             | Calado, J; Loeffler, J; Sakalli 16518345 No data for REN |
| 12 | 1 | GAS6 intron 8 c.834 + 7G > A gene polymorphism                                         | Erkoc R, Cikrikcioglu MA, Ai 25869052 No data for REN    |
| 13 | 1 | Gene polymorphisms of angiotensinogen                                                  | Su, SL; Lu, KC; Lin, YF; Hsu, 22147663 No data for REN   |
| 14 | 1 | Gene-Gene Interactions in Renin-Angiotensin System                                     | Su, SL; Yang, HY; Wu, CC; Le NA No data for REN          |
| 15 | 1 | Genes involved in the regulation of renin-angiotensin system                           | Litovkina, O; Nekipelova, E; 24727057 No data for REN    |
| 16 | 1 | Genetic Clues To The Etiology Of Renal Disease                                         | Krcunovic, Z; Novakovic, I; 1 NA No data for REN         |
| 17 | 1 | Genetic determination of TNF and its receptors                                         | Buraczynska K, Koziol-Mont 15600254 No data for REN      |
| 18 | 1 | Genetic polymorphisms of the renin-angiotensin system                                  | Buraczynska, M; Ksiazek, P; 16384824 No data for REN     |
| 19 | 1 | Genetic polymorphisms of the renin-angiotensin system                                  | Huang, HD; Lin, FJ; Li, XJ; W 21163122 No data for REN   |
| 20 | 1 | Genetic polymorphisms of the renin-angiotensin system                                  | Buraczynska, M; Ksiazek, P; 16384824 No data for REN     |
| 21 | 1 | Genetic variants of ACE (Insertion/Deletion)                                           | Shaikh, R; Shahid, SM; Man 24737640 No data for REN      |
| 22 | 1 | High prevalence of ACE DD genotype                                                     | Tripathi G, Dharmani P, Kha 17042963 No data for REN     |
| 23 | 1 | Identification of Cathepsin L as a potential target                                    | Bauer, Y; Hess, P; Qiu, CB; K 21357272 No data for REN   |
| 24 | 1 | Impact of aldosterone synthase gene polymorphisms                                      | Bantis C, Heering PJ, Siekier 21476902 No data for REN   |
| 25 | 1 | Impact of interaction of cigarette smoking and angiotensin II                          | Yang HY, Lu KC, Fang WH, L 23477970 No data for REN      |
| 26 | 1 | Impact of interferon-gamma and angiotensin II on endothelial nitric oxide synthase     | Masutani, K; Miyake, K; Nal 12552499 No data for REN     |
| 27 | 1 | Impact of nitric oxide synthase gene polymorphisms                                     | El-Din Bessa SS, Hamdy SM. 21854353 No data for REN      |
| 28 | 1 | Impact of Polymorphisms of the Renin-Angiotensin System                                | Jung, ES; Kim, SM; Cha, RH; 21150220 No data for REN     |
| 29 | 1 | Increased frequency of angiotensin II receptor type 1 gene polymorphisms               | Hsieh, MC; Lin, SR; Hsieh, T. 10862639 No data for REN   |
| 30 | 1 | Influence of aldosterone synthase gene polymorphisms                                   | Bantis, C; Heering, PJ; Stang 21777344 No data for REN   |
| 31 | 1 | Influence of angiotensin converting enzyme gene polymorphisms                          | Ramanathan, G; Ghosh, S; E 27748299 No data for REN      |
| 32 | 1 | Influence of cytokine gene polymorphisms                                               | Bantis, C; Heering, PJ; Luthe 15308875 No data for REN   |
| 33 | 1 | Influence of the endothelial nitric oxide synthase gene polymorphisms                  | Merta M, Reiterovaj J, Tesa 12212826 No data for REN   |
| 34 | 1 | Interaction between gene polymorphisms and environmental factors                       | Stratta, P; Bermond, F; Gua 14767013 No data for REN     |
| 35 | 1 | Interleukin 1 receptor antagonist gene polymorphisms                                   | Shu KH, Cheng CH, Wu MJ, 15717635 No data for REN        |
| 36 | 1 | Lack of association between the angiotensin II receptor type 1 gene polymorphisms      | Arfa I, Abid A, Noura S, Ello 18404607 No data for REN   |
| 37 | 1 | Lack of association between the angiotensin II receptor type 1 gene polymorphisms      | Fujita H, Narita T, Meguro H 10586428 No data for REN    |
| 38 | 1 | Lack of association between transmembrane protein 63 gene polymorphisms                | Chen WC, Chen SY, Chen Ch 20540633 No data for REN       |
| 39 | 1 | Lack Of Relationship Between Angiotensin II Receptor Type 1 Gene Polymorphisms         | Tarnow, L; Cambien, F; Ros 7729604 No data for REN       |
| 40 | 1 | Lack of synergism between long-term treatment with angiotensin II receptor antagonists | Tarnow, L; Kjeld, T; Knudsen 10907125 No data for REN    |
| 41 | 1 | Manganese Superoxide Dismutase Gene Polymorphisms                                      | Mohammedi, K; Bellili-Mun 24819633 No data for REN       |
| 42 | 1 | Manganese superoxide dismutase, angiotensin II receptor type 1 gene polymorphisms      | Kidir V, Uz E, Yigit A, Altun 26787049 No data for REN   |
| 43 | 1 | Mthfr C677T, A1298C And Ace I/D Polymorphisms                                          | El-Baz R, Settin A, Ismaeel A 22554825 No data for REN   |
| 44 | 1 | Nodular glomerulosclerosis and angiotensin II receptor type 1 gene polymorphisms       | Wang, M; Zhang, XX; Song, 26973293 No data for REN       |
| 45 | 1 | Non-relation of parathyroid hormone-related protein gene polymorphisms                 | Chen JB, Chou FF, Hsu KT. 15083922 No data for REN       |
| 46 | 1 | Platelet glycoprotein IIb/IIIa HPA-3 a/b gene polymorphisms                            | Wu JH, Zhang DW, Cheng X 22880801 No data for REN        |
| 47 | 1 | Polymorphism of angiotensin converting enzyme gene                                     | Frimat, L; Philippe, C; Magh 11053482 No data for REN    |
| 48 | 1 | Polymorphism of renin-angiotensin system                                               | Losito, A; Kalidas, K; Santon 12454231 No data for REN   |
| 49 |   |                                                                                        |                                                          |
| 50 |   |                                                                                        |                                                          |
| 51 |   |                                                                                        |                                                          |
| 52 |   |                                                                                        |                                                          |
| 53 |   |                                                                                        |                                                          |
| 54 |   |                                                                                        |                                                          |
| 55 |   |                                                                                        |                                                          |
| 56 |   |                                                                                        |                                                          |
| 57 |   |                                                                                        |                                                          |
| 58 |   |                                                                                        |                                                          |
| 59 |   |                                                                                        |                                                          |

|    |                                                                                               |
|----|-----------------------------------------------------------------------------------------------|
| 1  |                                                                                               |
| 2  | 1 Polymorphism of renin-angiotensin Woo, KT; Lau, YK; Choong, I 15504143 No data for REN      |
| 3  | 1 Polymorphism of the angiotensin I- Hanyu O, Hanawa H, Nakag 9509566 No data for REN         |
| 4  | 1 Polymorphisms in NADPH oxidase (Zhou H, Chen M, Zhu Y, Wa 26627442 No data for REN          |
| 5  | 1 Polymorphisms in the gene encodir Frojdo, S; Sjolind, L; Parkko 16211375 No data for REN    |
| 6  | 1 Polymorphisms of the renin-angiot Sprovieri, SRS; Sens, YAS 15934435 No data for REN        |
| 7  | 1 Predicting the development of diab William, J; Hogan, D; Batlle, 15822056 No data for REN   |
| 8  | 1 Pronatriodilatin gene polymorphis Nannipieri, M; Penno, G; Pu 10405209 No data for REN      |
| 9  | 1 Relationship between angiotensino Wang J, Zhu X, Yang L, Liu Y 11717948 No data for REN     |
| 10 | 1 Relationship between GSTs gene p Agrawal S, Tripathi G, Khan 18067039 No data for REN       |
| 11 | 1 Renal clearance of endogenous ery Nowicki M, Kokot F, Kokot I 7759206 No data for REN       |
| 12 | 1 Renal perfusion and the renal hemc Lansang, MC; Hollenberg, N 12086929 No data for REN      |
| 13 | 1 Renin-aldosterone response, urinar Hanukoglu, A; Edelheit, O; S 18634878 No data for REN    |
| 14 | 1 Renin-angiotensin system compone Kawada, N; Moriyama, T; Y 1NA No data for REN              |
| 15 | 1 Renin-angiotensin system gene pol Lau YK, Woo KT, Choong HL 15153745 No data for REN        |
| 16 | 1 Renin-angiotensin-aldosterone syst Chen, WJ; Huang, YL; Shiue, 24907556 No data for REN     |
| 17 | 1 Role of ADDUCIN Gly460Trp, ACE I/ Sancakdar, E; Ates, K; Kama NA No data for REN            |
| 18 | 1 Role of the alpha-adducin genotype Nicod, J; Frey, BM; Frey, FJ; 11918733 No data for REN   |
| 19 | 1 Serological and genetic factors in e; Coppo, R; Amore, A; Chiesa 17988266 No data for REN   |
| 20 | 1 SIRTUIN 1 gene polymorphisms are Shimoyama Y, Mitsuda Y, T 22200427 No data for REN         |
| 21 | 1 Structural analysis of the 11 beta-h Zaehner, T; Plueshke, V; Fre 11012876 No data for REN  |
| 22 | 1 Study of the association of -667 aqt Kang SW, Kim YW, Kim YH, 17763164 No data for REN      |
| 23 | 1 Study on 3'-UTR length polymorphi Sui W, Zheng C, Yang M, Ou 26554293 No data for REN       |
| 24 | 1 Survival in type 2 diabetic patients i Padro-Miquel, A; Alia-Ramc 19014923 No data for REN  |
| 25 | 1 The DD genotype of the ACE gene ç Azar, ST; Zalloua, P; Medlej, 11428725 No data for REN    |
| 26 | 1 The DD genotype of the ACE gene ç Vleming, LJ; van der Pijl, JW 10099885 No data for REN    |
| 27 | 1 The effect of polymorphisms in the Mollsten, A; Kockum, I; Sve 18413189 No data for REN     |
| 28 | 1 The influence of G-protein beta3-sú ReiterovÁj J, Miroslav M, St 15287194 No data for REN   |
| 29 | 1 The influence of the endothelin-cor ReiterovÁj J, Merta M, Stek 16526315 No data for REN    |
| 30 | 1 The relationship between genetic a Shestakova, MV; Vikulova, 1NA No data for REN            |
| 31 | 1 The relationship between the TGF-I Li Y, Liu FY, Peng YM, Li J, St 20446778 No data for REN |
| 32 | 1 The renin--angiotensin system gene Ong-Ajyooth S, Ong-Ajyootl 10511770 No data for REN      |
| 33 | 1 Toll-like receptor 9 SNPs are suscep Chen YT, Wei CC, Ng KL, Ch 23964786 No data for REN    |
| 34 | 1 U.K. Prospective Diabetes Study. X\ Dudley CR, Keavney B, Strat 8587251 No data for REN     |
| 35 | 1 Vitamin D binding protein and the r Speeckaert MM, Glorieux G 18721734 No data for REN      |
| 36 | 1 Vitamin D receptor genetic variants Tripathi G, Sharma R, Sharn 20722565 No data for REN    |
| 37 | 1 20-Hydroxyeicosatetraenoic Acid (I Savas, S; Wei, SZ; Hsu, MH; NA Non-human                 |
| 38 | 1 Adenosine A(1) receptor-dependen Gao, X; Peleli, M; Zollbrecht 25251152 Non-human           |
| 39 | 1 Adrenomedullin gene expression di Caron, K; Hagaman, J; Nishi 17360661 Non-human            |
| 40 | 1 Altered regulation of renal interstit O'Tierney, PF; Komolova, M 18192845 Non-human         |
| 41 | 1 Alternative splicing of vitamin D-24 Ren S, Nguyen L, Wu S, Enci 15788398 Non-human         |
| 42 | 1 An essential role of angiotensin II r Hisada, Y; Sugaya, T; Tanaka 11555672 Non-human       |
| 43 | 1 Angiotensin converting enzyme (AC Shahid, SM; Fatima, SN; Ma 24035938 Non-human             |
| 44 | 1 Angiotensin II mesenteric and renal Broome, M; Aneman, A; Ha 11065204 Non-human             |
| 45 | 1 Angiotensin-converting enzyme inh Jonsson, JR; Clouston, AD; A 11438504 Non-human           |
| 46 | 1 Angiotensin-li Enhances Norepinep NOSHIRO, T; SHIMIZU, K; W NA Non-human                    |
| 47 | 1 Antihypertensive Role of Tissue Kal Waeckel, L; Potier, L; Cholle 22669897 Non-human        |
| 48 | 1 Appropriate regulation of renin anc Catanzaro DF, Chen R, Yan ` 9931123 Non-human           |
| 49 |                                                                                               |
| 50 |                                                                                               |
| 51 |                                                                                               |
| 52 |                                                                                               |
| 53 |                                                                                               |
| 54 |                                                                                               |
| 55 |                                                                                               |
| 56 |                                                                                               |
| 57 |                                                                                               |
| 58 |                                                                                               |
| 59 |                                                                                               |



|    |   |                                       |                                                   |
|----|---|---------------------------------------|---------------------------------------------------|
| 1  |   |                                       |                                                   |
| 2  | 1 | Blood pressure and renal hemodyn      | Kumari, S; Sharma, N; Thak 27350671 Non-human     |
| 3  | 1 | Blood pressure and renin-angiotens    | Bohlender, J; Bader, M; Me 22728903 Non-human     |
| 4  | 1 | Cardiac angiotensin-(1-12) expressi   | Ferrario CM, VonCannon J, 26873967 Non-human      |
| 5  | 1 | Cardiovascular dysfunction in Zucke   | Marsh, SA; Powell, PC; Agar 17351065 Non-human    |
| 6  | 1 | Chronic hypertension and altered b    | Merrill, DC; Thompson, MW 8613528 Non-human       |
| 7  | 1 | Collecting duct-specific knockout of  | Gao, Y; Stuart, D; Pollock, J 27707708 Non-human  |
| 8  | 1 | Compensatory up-regulation of an      | Wang, Q; Hummler, E; Mail 11380824 Non-human      |
| 9  | 1 | Control of renin secretion from kidr  | Dong Y, Wang M, Nong L, V 25824806 Non-human      |
| 10 | 1 | Cosegregation of spontaneously hy     | Gao, Y; Stuart, D; Pollock, J 27707708 Non-human  |
| 11 | 1 | Dendritic cell nuclear protein-1, a n | Zhou T, Wang S, Ren H, Qi 20693543 Non-human      |
| 12 | 1 | Effect Of Angiotensin-Converting En   | NOSHIRO, T; WAY, D; MCGI 1648463 Non-human        |
| 13 | 1 | Effect Of Nitric-Oxide On Renin Sec   | GREENBERG, SG; HE, XR; SC 7771523 Non-human       |
| 14 | 1 | Effect of SWL on renal hemodynam      | Yilmaz, E; Mert, C; Keskil, Z; 22945811 Non-human |
| 15 | 1 | Effect of the angiotensinogen geno    | Handtrack, C; Cordasic, N; k 17333097 Non-human   |
| 16 | 1 | Effects of plasma kallikrein deficien | Bird, JE; Smith, PL; Wang, X 22398951 Non-human   |
| 17 | 1 | Elevated blood pressures in mice la   | Shesely, EG; Maeda, N; Kim 8917564 Non-human      |
| 18 | 1 | Endothelium-Dependent Relaxator       | STEPHAN, D; BILLING, A; KR 8606521 Non-human      |
| 19 | 1 | Functional genetic variation in amir  | Tonna, S; Dandapani, SV; U 18206321 Non-human     |
| 20 | 1 | Gene Trapping Uncovers Sex-Specif     | Park, S; Liu, XB; Davis, DR; S 22547438 Non-human |
| 21 | 1 | Genetic analysis of the S-A and Na+   | Lodwick, D; Zagato, L; Kaise 9535139 Non-human    |
| 22 | 1 | GPR48 Increases Mineralocorticoid     | Wang, J; Li, XY; Ke, YY; Lu, Y 22135314 Non-human |
| 23 | 1 | Hypertension in unilaterally nephre   | Marley, WS; Bowen, R; Got 10567853 Non-human      |
| 24 | 1 | Hypervolemia of pregnancy is not n    | Morgan, TK; Rohrwasser, A 16796982 Non-human      |
| 25 | 1 | Knockdown of parathyroid hormon       | Raison, D; Coquard, C; Hocf 23720345 Non-human    |
| 26 | 1 | Lack of an effect of collecting duct- | Kittikulsuth, W; Stuart, D; V 24431204 Non-human  |
| 27 | 1 | Local Renal Circadian Clocks Contro   | Tokonami, N; Mordasini, D; 24652800 Non-human     |
| 28 | 1 | Low Blood Pressure in Endothelial     | Kisanuki, YY; Emoto, N; Oh 20516397 Non-human     |
| 29 | 1 | Metformin prevents the impairmer      | Gomes, MB; Cailleaux, S; Ti 16133490 Non-human    |
| 30 | 1 | Mice lacking endothelial ACE - Norr   | Cole, JM; Khokhlova, N; Sut 12574101 Non-human    |
| 31 | 1 | Mice with targeted disruption of th   | Langaa, S; Bloksgaard, M; B 22237802 Non-human    |
| 32 | 1 | N-domain angiotensin I-converting     | Bueno, V; Palos, M; Ronchi, 15194348 Non-human    |
| 33 | 1 | Nebivolol treatment improves resis    | Wang, Y; Zhang, MS; Liu, Y 23263161 Non-human     |
| 34 | 1 | Nephron-specific deletion of the pr   | Ramkumar, N; Stuart, D; Ca 25995108 Non-human     |
| 35 | 1 | Parallel regulation of renin and lyso | Schmid, J; Oelbe, M; Saftig, 23229015 Non-human   |
| 36 | 1 | Physiological impact of increased e   | Le, TH; Kim, HS; Allen, AM; 12963678 Non-human    |
| 37 | 1 | Pituitary adenylate cyclase-activatir | Hautmann, M; Friis, UG; De 17360952 Non-human     |
| 38 | 1 | Preserved macula densa-dependen       | Schweda, F; Wagner, C; Kra 12475747 Non-human     |
| 39 | 1 | Rat Ace allele variation determines   | Kamilic, J; Hamming, I; Lely, 21788250 Non-human  |
| 40 | 1 | Reciprocal expression of connexin 4   | Kurt, B; Kurtz, L; Sequeira-L 21209011 Non-human  |
| 41 | 1 | Regulation of renin secretion and e   | Kim, SM; Chen, LM; Faulhak 17515456 Non-human     |
| 42 | 1 | Renal cyst growth is the main deter   | Fonseca, JM; Bastos, AP; Ar 24429399 Non-human    |
| 43 | 1 | Replacement of connexin 40 by cor     | Kurtz, L; Gerl, M; Kriz, W; V 19474190 Non-human  |
| 44 | 1 | Role of angiotensin-converting enz    | Yang, XH; Wang, YH; Wang, 22580272 Non-human      |
| 45 | 1 | Role of blood pressure and the reni   | Zhang, MZ; Wang, SW; Yan 22114203 Non-human       |
| 46 | 1 | Role of cGMP-kinase II in the contr   | Wagner, C; Pfeifer, A; Ruth, 9788971 Non-human    |
| 47 | 1 | Role of neutral endopeptidase 24.1    | Wegner, M; HirthDietrich, C 8759244 Non-human     |
| 48 | 1 | Stimulation of renin release by pro   | Schweda, F; Klar, J; Narumi 15113745 Non-human    |
| 49 |   |                                       |                                                   |
| 50 |   |                                       |                                                   |
| 51 |   |                                       |                                                   |
| 52 |   |                                       |                                                   |
| 53 |   |                                       |                                                   |
| 54 |   |                                       |                                                   |
| 55 |   |                                       |                                                   |
| 56 |   |                                       |                                                   |
| 57 |   |                                       |                                                   |
| 58 |   |                                       |                                                   |
| 59 |   |                                       |                                                   |

|    |   |                                                                      |                                  |
|----|---|----------------------------------------------------------------------|----------------------------------|
| 1  |   |                                                                      |                                  |
| 2  | 1 | Stimulation of renin secretion by ni Kurtz, A; Gotz, KH; Hamann      | 9539809 Non-human                |
| 3  | 1 | Stimulation of renin secretion by Ni Kurtz, A; Gotz, KH; Hamann      | 9575895 Non-human                |
| 4  | 1 | The angiotensin II receptor blocker Laesser, M; Oi, Y; Ewert, S;     | 14995942 Non-human               |
| 5  | 1 | The angiotensin type II receptor tor Hunley, TE; Tamura, M; Sto      | 10652034 Non-human               |
| 6  | 1 | The elevated blood pressure of hun Wang, Z; Armando, I; Asico,       | 17259440 Non-human               |
| 7  | 1 | The genetic deletion of Mas abolish Heringer-Walther, S; Gemb        | 22652430 Non-human               |
| 8  | 1 | Thyroid hormones stimulate renal € Pinto, ACOD; Barbosa, CML NA      | Non-human                        |
| 9  | 1 | Transfer of a salt-resistant renin all Jiang, J; Stec, DE; Drummor   | 9040448 Non-human                |
| 10 | 1 | Vascular and renal effects of vasopri Cheng, ZJ; Gronholm, T; Lot    | 16093923 Non-human               |
| 11 | 1 | Vascular angiotensin-converting en Muller, DN; Bohlender, J; H       | 9039087 Non-human                |
| 12 | 1 | A female with X-linked Alport syndr Mohammad, M; Nanra, R; C         | 24337245 Not a case-control stuc |
| 13 | 1 | A Genetic Variant in the Distal Enhã Makino, Y; Konoshita, T; On     | 26366736 Not a case-control stuc |
| 14 | 1 | A Synergistic Association of ACE I/D Rodriguez-Perez, JC; Macia:     | 19546528 Not a case-control stuc |
| 15 | 1 | ACE gene polymorphism in focal se; Kuzmanic, D; Jelakovic, B; BNA    | Not a case-control stuc          |
| 16 | 1 | Alport Syndrome in Women and Gi Savige, J; Colville, D; Rheaul       | 27287265 Not a case-control stuc |
| 17 | 1 | Angiotensin converting enzyme ger Miller, JA; Scholey, JW; Tha       | 8995725 Not a case-control stuc  |
| 18 | 1 | Angiotensin-converting enzyme ger Beige, J; Scherer, S; Weber,       | 9259361 Not a case-control stuc  |
| 19 | 1 | Angiotensin-converting enzyme ger Akcay, A; Ozdemir, FN; Atac        | 15013293 Not a case-control stuc |
| 20 | 1 | Angiotensin-converting-enzyme ins Beige, J; Offermann, G; Dist       | 9550656 Not a case-control stuc  |
| 21 | 1 | Angiotensinogen concentrations an Bohlender J, MÃ©nard J, G          | 10720595 Not a case-control stuc |
| 22 | 1 | Angiotensinogen gene variation an Narita, I; Goto, S; Saito, N; S    | 12911556 Not a case-control stuc |
| 23 | 1 | Antihypertensive treatment modul; Kuznetsova, T; Staessen, JA        | 10918550 Not a case-control stuc |
| 24 | 1 | Assessing genetic susceptibility to c Tanaka, N; Babazono, T         | 16174281 Not a case-control stuc |
| 25 | 1 | Association between Angiotensin I- Huang, ZK; Wu, B; Tao, J; H;      | 26000752 Not a case-control stuc |
| 26 | 1 | Association between two genetic p Ding, W; Wang, FR; Fang, Q         | 21607620 Not a case-control stuc |
| 27 | 1 | Association of angiotensinogen gen Pei, Y; Scholey, J; Thai, K; Su   | 9259580 Not a case-control stuc  |
| 28 | 1 | Association of the genetic polymor; Akcay, A; Sezer, S; Ozdemir,     | 15385810 Not a case-control stuc |
| 29 | 1 | Bilateral high origins of testicular ar Geller, DS; Zhang, JH; Zennã | 16611713 Not a case-control stuc |
| 30 | 1 | Catalase activity, allelic variations ir Mohammadi, K; Patente, T;   | 24057136 Not a case-control stuc |
| 31 | 1 | Contribution of gene polymorphisr Anguiano, L; Riera, M; Pasc        | 25813276 Not a case-control stuc |
| 32 | 1 | Correlates of ACE activity in macroã Amorim, CEN; Nogueira, E;       | 23362199 Not a case-control stuc |
| 33 | 1 | Deletion insertion polymorphism of Bjorck, S; Blohme, G; Sylver      | 9269704 Not a case-control stuc  |
| 34 | 1 | Diabetes, nephropathy, and the rer Hollenberg, NK                    | 16601578 Not a case-control stuc |
| 35 | 1 | Diagnosis of a case of Gitelman's sy Kageyama, K; Terui, K; Shoj     | 16370563 Not a case-control stuc |
| 36 | 1 | Disorders of mineralocorticoid synt Connell, JMC; Fraser, R; Dav     | 11469810 Not a case-control stuc |
| 37 | 1 | Epidemiology and genetics of calcif O'Brien, KD                      | 17963677 Not a case-control stuc |
| 38 | 1 | Expert Guidelines for the Manager Savige, J; Gregory, M; Gross       | 23349312 Not a case-control stuc |
| 39 | 1 | Frequencies of apolipoprotein E all; Su YY, Zhang YF, Yang S, Wa     | 25707516 Not a case-control stuc |
| 40 | 1 | Gene Polymorphisms of the Renin-; Zhang, G; Wang, H; Wang, I         | 17984617 Not a case-control stuc |
| 41 | 1 | Genetic determinants of diabetic re Schmidt, S; Ritz, E              | NA Not a case-control stuc       |
| 42 | 1 | Genetic polymorphisms of renin-an BuraczyÅ„ska M, Grzebalsk          | 12898858 Not a case-control stuc |
| 43 | 1 | Genetics and the prediction of com Marre, M                          | 10097900 Not a case-control stuc |
| 44 | 1 | Genetics of diabetic nephropathy Rippin, JD; Patel, A; Bain, SC      | 11554775 Not a case-control stuc |
| 45 | 1 | Genome-Wide Association Analysis Musani, SK; Fox, ER; Kraja, ;       | 25561047 Not a case-control stuc |
| 46 | 1 | Identification of a novel mutation ir Riepe, FG; Krone, N; Morlot    | 12679457 Not a case-control stuc |
| 47 | 1 | Impact of genetic polymorphisms o Siekierka-Harreis, M; Kuhr,        | 19681973 Not a case-control stuc |
| 48 | 1 | Impact of polymorphisms in the rer Orenes-Pinero, E; Hernand         | 21507890 Not a case-control stuc |
| 49 |   |                                                                      |                                  |
| 50 |   |                                                                      |                                  |
| 51 |   |                                                                      |                                  |
| 52 |   |                                                                      |                                  |
| 53 |   |                                                                      |                                  |
| 54 |   |                                                                      |                                  |
| 55 |   |                                                                      |                                  |
| 56 |   |                                                                      |                                  |
| 57 |   |                                                                      |                                  |
| 58 |   |                                                                      |                                  |
| 59 |   |                                                                      |                                  |
| 60 |   |                                                                      |                                  |



|    |   |                                       |                                                                  |
|----|---|---------------------------------------|------------------------------------------------------------------|
| 1  |   |                                       |                                                                  |
| 2  | 1 | Increased left ventricular mass in n  | Sato, A; Tarnow, L; Parving, 9727905 Not a case-control stuc     |
| 3  | 1 | Influence of cytokine gene polymor    | Bantis C, Heering P, Aker S, 18300111 Not a case-control stuc    |
| 4  | 1 | Influence of genetic polymorphism:    | Bantis, C; Ivens, K; Kreusser 15031629 Not a case-control stuc   |
| 5  | 1 | Is there a role of angiotensin-conve  | Isbir, CS; Akgun, S; Yilmaz, F 11525534 Not a case-control stuc  |
| 6  | 1 | Juxtaglomerular cell tumor of the k   | Endoh, Y; Motoyama, T; Ha 9211527 Not a case-control stuc        |
| 7  | 1 | Normative genetic profiles of RAAS    | Prasad, P; Thelma, BK 18027817 Not a case-control stuc           |
| 8  | 1 | Novel mutations in the inverted for   | Xie J, Hao X, Azeloglu EU, R 26039629 Not a case-control stuc    |
| 9  | 1 | Prognostic role of serum ACE activi   | Wong, TYH; Szeto, CC; Chov 11979350 Not a case-control stuc      |
| 10 | 1 | Randomized Controlled Trial: Lisino   | Amara, AB; Sharma, A; Alex 20061926 Not a case-control stuc      |
| 11 | 1 | Rapid detection and quantification    | Zhou H, Hoek M, Yi P, Rohr 24591025 Not a case-control stuc      |
| 12 | 1 | Relationships between HLA-A, -B, -I   | Ozdemir BH, Izdemir FN, Cc 15354972 Not a case-control stuc      |
| 13 | 1 | Renal angiomyolipoma - Further im     | Stone, CH; Lee, MW; Amin, 11371226 Not a case-control stuc       |
| 14 | 1 | Renal Tubular Dysgenesis in Israel:   | Moldavsky, M 19344005 Not a case-control stuc                    |
| 15 | 1 | Renin-angiotensin system gene pol     | Parsa, A; Lovett, DH; Peden 15789057 Not a case-control stuc     |
| 16 | 1 | Renoprotective efficacy of renin-an   | Narita, I; Goto, S; Saito, N; S 14684698 Not a case-control stuc |
| 17 | 1 | Rho kinase polymorphism influence     | Seasholtz, TM; Wessel, J; R 16585408 Not a case-control stuc     |
| 18 | 1 | Risk of developing diabetic nephro    | Savage, DA; Feeney, SA; Fo 10328465 Not a case-control stuc      |
| 19 | 1 | Role Of The Deletion Polymorphisr     | YOSHIDA, H; MITARAI, T; K/ 7593601 Not a case-control stuc       |
| 20 | 1 | Successful treatment of decompens     | Csatary, LK; Schnabel, R; Ba 10216467 Not a case-control stuc    |
| 21 | 1 | The deletion/insertion polymorphis    | Staessen, JA; Wang, JG; Gin 9488209 Not a case-control stuc      |
| 22 | 1 | The effects of angiotensin-converti   | Draman, CR; Kong, NCT; Ga 19037561 Not a case-control stuc       |
| 23 | 1 | The Epithelial Sodium Channel gam     | Busst, CJ; Bloomer, LDS; Sci 22006290 Not a case-control stuc    |
| 24 | 1 | The kidney in diabetes: How to con    | Mogensen, CE 11158852 Not a case-control stuc                    |
| 25 | 1 | The role of renin-angiotensin-aldos   | Kelly TN, Raj D, Rahman M, 25906781 Not a case-control stuc      |
| 26 | 1 | Tip lesion variant of primary focal a | Mungan S, Turkmen E, Aydi 25857429 Not a case-control stuc       |
| 27 | 1 | Tip variant of focal segmental glom   | Trivedi M, Pasari A, Chowdl 25721429 Not a case-control stuc     |
| 28 | 1 | Twenty-one additional cases of farr   | Calado, J; Sznajer, Y; Metzg 18622023 Not a case-control stuc    |
| 29 | 1 | [Possible pathogenetic role of 11 b   | Morales MA, Carvajal CA, O 18769825 Not a renal disease foc      |
| 30 | 1 | A clinical phenotype mimicking ess    | Rossi E, Farnetti E, Nicoli D, 21525970 Not a renal disease foc  |
| 31 | 1 | A Computational Model of the Circ     | Guillaud, F; Hannaert, P 20683640 Not a renal disease foc        |
| 32 | 1 | A functional variant of the NEDD4L    | Svensson-FÅrnbom P, Wahl 21052022 Not a renal disease foc        |
| 33 | 1 | A new mutation, R563Q, of the bet     | Rayner, BL; Owen, EP; King, 12714866 Not a renal disease foc     |
| 34 | 1 | A new theory of essential hyperten    | Eggers, AE 26243176 Not a renal disease foc                      |
| 35 | 1 | A role for CETP TaqIB polymorphisn    | Asselbergs, FW; Moore, JH; 16623947 Not a renal disease foc      |
| 36 | 1 | ACE and PC-1 gene polymorphisms       | de Azevedo, MJ; Dalmaz, C/ 12126783 Not a renal disease foc      |
| 37 | 1 | ACE gene insertion/deletion polym     | Lee, YJ; Tsai, JCR 12032106 Not a renal disease foc              |
| 38 | 1 | Activation of the hypothalamic-pitu   | Walker BR, Andrew R, Escor 24712576 Not a renal disease foc      |
| 39 | 1 | ADAM33: a newly identified gene ir    | Holgate ST, Davies DE, Pow 16257631 Not a renal disease foc      |
| 40 | 1 | Adsorption of cytotoxic anti-HLA ar   | DeVito LD, Sollinger HW, Bl 2186524 Not a renal disease foc      |
| 41 | 1 | Albuminuria and the renin-angioter    | Thomas, GN; Critchley, JAJ/ 11200871 Not a renal disease foc     |
| 42 | 1 | Alpha Adducin G460T Variant is a R    | Soualmia, H; Ben Romdhan 27349000 Not a renal disease foc        |
| 43 | 1 | Alpha-adducin polymorphism in hy      | Barlassina C, Norton GR, Sa 10912759 Not a renal disease foc     |
| 44 | 1 | alpha-Adducin polymorphisms and       | Manunta, P; Cusi, D; Barlas 9607177 Not a renal disease foc      |
| 45 | 1 | Amelioration of genetic hypertensi    | Sanada, H; Yatabe, J; Midor 16636192 Not a renal disease foc     |
| 46 | 1 | Amiloride, a specific drug for hyper  | Baker EH, Duggal A, Dong Y 12105131 Not a renal disease foc      |
| 47 | 1 | Androgen-Sensitive Hypertension       | A Wu, CC; Mei, SJ; Cheng, J; C 23641057 Not a renal disease foc  |
| 48 | 1 | Angiotensin converting enzyme ger     | Fernandez-Llama, P; Poch, I 9607207 Not a renal disease foc      |
| 49 |   |                                       |                                                                  |
| 50 |   |                                       |                                                                  |
| 51 |   |                                       |                                                                  |
| 52 |   |                                       |                                                                  |
| 53 |   |                                       |                                                                  |
| 54 |   |                                       |                                                                  |
| 55 |   |                                       |                                                                  |
| 56 |   |                                       |                                                                  |
| 57 |   |                                       |                                                                  |
| 58 |   |                                       |                                                                  |
| 59 |   |                                       |                                                                  |
| 60 |   |                                       |                                                                  |

|    |   |                                            |                                                                                    |
|----|---|--------------------------------------------|------------------------------------------------------------------------------------|
| 1  |   |                                            |                                                                                    |
| 2  | 1 | Angiotensin II sensitivity in nonpregnancy | Spaanderman, MEA; Ekhardt 15350256 Not a renal disease foc                         |
| 3  | 1 | Angiotensin II type 1 receptor gene        | Miller, JA; Thai, K; Scholey, 10969844 Not a renal disease foc                     |
| 4  | 1 | Angiotensin II Type 1A Receptors in        | Sparks, MA; Parsons, KK; St 21242463 Not a renal disease foc                       |
| 5  | 1 | Angiotensin II type 2 receptor gene        | Yoneda, A; Cascio, S; Green 12187255 Not a renal disease foc                       |
| 6  | 1 | Angiotensin II-dependent chronic           | hypertension Touyz, RM; Mercure, C; He, 15753233 Not a renal disease foc           |
| 7  | 1 | Angiotensin-converting enzyme (ACE)        | Mansoor Q, Javaid A, Bilal M 22607040 Not a renal disease foc                      |
| 8  | 1 | Angiotensin-converting enzyme gene         | Wipff J, Gallier G, Dieude P, 19132786 Not a renal disease foc                     |
| 9  | 1 | Angiotensin-converting enzyme gene         | Stefansson, B; Ricksten, A; I 10855732 Not a renal disease foc                     |
| 10 | 1 | Angiotensin-converting enzyme gene         | Singh M, Singh AK, Singh S, 27030424 Not a renal disease foc                       |
| 11 | 1 | Angiotensin-converting enzyme gene         | Uhm, WS; Lee, HS; Chung, Y 12043886 Not a renal disease foc                        |
| 12 | 1 | ANGIOTENSIN-CONVERTING ENZYME              | LACHURIE, ML; AZIZI, M; GU 7796503 Not a renal disease foc                         |
| 13 | 1 | Angiotensin-converting enzyme gene         | Prkacin I, Novak B, SertiÅk J 11505631 Not a renal disease foc                     |
| 14 | 1 | Angiotensinogen and angiotensin II         | Lee, KB; Kim, UK 12950120 Not a renal disease foc                                  |
| 15 | 1 | Angiotensinogen genotype affects           | hypertension Hopkins, PN; Hunt, SC; Jeur 11997278 Not a renal disease foc          |
| 16 | 1 | Angiotensinogen T235 and ACE               | inhibitors Young, RP; Chan, JCN; Critcl 9540028 Not a renal disease foc            |
| 17 | 1 | Apparent mineralocorticoid excess:         | Mantero, F; Palermo, M; Pe 8732999 Not a renal disease foc                         |
| 18 | 1 | Association between plasma activity        | Boomsma F, Pedersen-Bjerg 15830186 Not a renal disease foc                         |
| 19 | 1 | Association Between Polymorphism           | Li, Y; Li, NF; Yao, XG; Heizat 27555048 Not a renal disease foc                    |
| 20 | 1 | Association between polymorphism           | Sprovieri, SRS; Sens, YA; Ma 16047641 Not a renal disease foc                      |
| 21 | 1 | Association between RAS gene poly          | Nalbantoglu, S; Tabel, Y; Mi 23151617 Not a renal disease foc                      |
| 22 | 1 | Association between renin-angiotensi       | Song SB, Jin HS, Hong KW, L 21342026 Not a renal disease foc                       |
| 23 | 1 | Association of ACE gene D polymor          | Bahramali, E; Rajabi, M; Jan 26861937 Not a renal disease foc                      |
| 24 | 1 | Association of angiotensin-converti        | Zhou, J; Zheng, SC; Wang, Z 26823847 Not a renal disease foc                       |
| 25 | 1 | Association of angiotensinogen M2          | RodrÃ-guez-PÃ©rez JC, Roc 11345362 Not a renal disease foc                         |
| 26 | 1 | Association of hypertension with           | TGF-β Baker, EH; Dong, YB; Sagnel 9593408 Not a renal disease foc                  |
| 27 | 1 | Association of Polymorphisms in            | Endothelin Mokretar, K; Velinov, H; Po 26670794 Not a renal disease foc            |
| 28 | 1 | Association of renin-angiotensin an        | Conen D, Glynn RJ, Buring J 18698212 Not a renal disease foc                       |
| 29 | 1 | Associations between the human ir          | Frossard PM, Parvez SH, Le 14647005 Not a renal disease foc                        |
| 30 | 1 | Atrial Natriuretic Peptide Locally         | Controlled Nakagawa, H; Oberwinkler, 25027872 Not a renal disease foc              |
| 31 | 1 | Beneficial role of D allele in control     | Kumari, S; Sharma, N; Thak 27350671 Not a renal disease foc                        |
| 32 | 1 | Biochemical and genetic characteri         | Osdemir O, Kayatas M, Ceti 25394530 Not a renal disease foc                        |
| 33 | 1 | Blunted renal vascular response to         | hypertension Hopkins, PN; Lifton, RP; Hol 8728297 Not a renal disease foc          |
| 34 | 1 | CARD8 rs2043211 polymorphism is            | associated Chen Y, Ren X, Li C, Xing S, F 25790751 Not a renal disease foc         |
| 35 | 1 | Cardiovascular effects of aldosteron       | receptor Escoubet B, Couffignal C, La 23852419 Not a renal disease foc             |
| 36 | 1 | Clinical and laboratory characteriza       | Dong Y, Wang M, Nong L, W 25824806 Not a renal disease foc                         |
| 37 | 1 | Common genetic variants and haplo          | type Barlassina, C; Dal Fiume, C; 17510212 Not a renal disease foc                 |
| 38 | 1 | Common genetic variants in the chi         | mosome Yu L, Jiang L, Zhou XJ, Zhu L 20113265 Not a renal disease foc              |
| 39 | 1 | Common variation in KLKB1 and es           | trogen Lu, XF; Zhao, WY; Huang, JF 17318641 Not a renal disease foc                |
| 40 | 1 | Comprehensive analysis of the reni         | ngin Kato, N; Sugiyama, T; Morit 10953993 Not a renal disease foc                  |
| 41 | 1 | Connexin 40 is dispensable for vasc        | ular remodeling Machura, K; Neubauer, B; M 25241776 Not a renal disease foc        |
| 42 | 1 | Connexin 43 is not essential for the       | vascular remodeling Gerl, M; Kurt, B; Kurtz, A; W 24062052 Not a renal disease foc |
| 43 | 1 | Contribution of angiotensin I conve        | rsion Mondorf UF, Russ A, Wiese 9524045 Not a renal disease foc                    |
| 44 | 1 | CYP2C9 genotype modifies activity          | Osawa, N; Koya, D; Araki, S; 17143591 Not a renal disease foc                      |
| 45 | 1 | CYP3A5 and ABCB1 genes and hype            | rtension Bochud, M; Bovet, P; Burnie 19290795 Not a renal disease foc              |
| 46 | 1 | CYP3A5 genotype is associated with         | hypertension Fromm MF, Schmidt BM, Pa 16141800 Not a renal disease foc             |
| 47 | 1 | Deletion polymorphism of the angi          | otensin Gharavi AG, Lipkowitz MS, I 8677872 Not a renal disease foc                |
| 48 | 1 | Detection of the association betwe         | n Matsumoto, A; Iwashima, Y 11106834 Not a renal disease foc                       |
| 49 |   |                                            |                                                                                    |
| 50 |   |                                            |                                                                                    |
| 51 |   |                                            |                                                                                    |
| 52 |   |                                            |                                                                                    |
| 53 |   |                                            |                                                                                    |
| 54 |   |                                            |                                                                                    |
| 55 |   |                                            |                                                                                    |
| 56 |   |                                            |                                                                                    |
| 57 |   |                                            |                                                                                    |
| 58 |   |                                            |                                                                                    |
| 59 |   |                                            |                                                                                    |

|    |   |                                        |                                 |                                  |
|----|---|----------------------------------------|---------------------------------|----------------------------------|
| 1  |   |                                        |                                 |                                  |
| 2  | 1 | Effect of the plasminogen-plasmin      | Knier, B; Cordasic, N; Klank    | 21610512 Not a renal disease foc |
| 3  | 1 | Efficacy of large doses of IL-2-activa | Cao S, Wang YL, Ren XB, Yu      | 21812652 Not a renal disease foc |
| 4  | 1 | Endothelial nitric oxide synthase ge   | Page, A; Reich, H; Zhou, J; L   | 16093452 Not a renal disease foc |
| 5  | 1 | Evaluation of risk factors for the de  | Barnas, U; Schmidt, A; Illiev   | 9084972 Not a renal disease foc  |
| 6  | 1 | Evaluation Of The Sa Locus In Hum      | Nabika, T; Bonnardeaux, A;      | 7843754 Not a renal disease foc  |
| 7  | 1 | Exaggerated natriuresis during clar    | Simonsen, JA; Rasmussen, I      | 21749320 Not a renal disease foc |
| 8  | 1 | Extensive personal experience - Ex     | Dave-Sharma, S; Wilson, RC      | 9661590 Not a renal disease foc  |
| 9  | 1 | Frequencies Of Variants Of Candida     | Zee, Ryl; Bennett, Cl; Schrac   | 7882587 Not a renal disease foc  |
| 10 | 1 | Gene polymorphism of vascular en       | Yang, JW; Hutchinson, IV; S     | 21080079 Not a renal disease foc |
| 11 | 1 | Genetic polymorphism of Na-K cotr      | Cusi D, Stella P, Pozzoli E, B  | 2258861 Not a renal disease foc  |
| 12 | 1 | Genetic polymorphisms of the renin     | Oliveri, O; Trabetti, E; Graz   | 10567188 Not a renal disease foc |
| 13 | 1 | Genetic polymorphisms of the renin     | Fabris, B; Bortoletto, M; Cal   | 15662219 Not a renal disease foc |
| 14 | 1 | Genetic risk of atherosclerotic rena   | van Onna, M; Kroon, AA; Ho      | 15326089 Not a renal disease foc |
| 15 | 1 | Genetic variant of the renin-angiot    | Ichikawa, M; Konoshita, T; I    | 24549414 Not a renal disease foc |
| 16 | 1 | Genetic variants in five novel loci in | Jiang DK, Ma XP, Yu H, Cao      | 25802187 Not a renal disease foc |
| 17 | 1 | Genetic variants in hypertensive pa    | Szperl, M; Dzielinska, Z; Ros   | 19043368 Not a renal disease foc |
| 18 | 1 | Genetic variants in the inositol pho   | Tan J, Yu CY, Wang ZH, Che      | 25683757 Not a renal disease foc |
| 19 | 1 | Genetic variation in the KCNMA1 p      | Tomas, M; Vazquez, E; Fern      | 18854754 Not a renal disease foc |
| 20 | 1 | Genetic variation of the renin-angic   | Hsu, CCC; Bray, MS; Kao, W      | 16396964 Not a renal disease foc |
| 21 | 1 | Genetic-Control Of Blood-Pressure      | Kim, Hs; Krege, Jh; Kluckma     | 7708716 Not a renal disease foc  |
| 22 | 1 | Genomic association analysis identi    | Turner ST, Bailey KR, Schwa     | 22566498 Not a renal disease foc |
| 23 | 1 | Genotype-phenotype analysis of an      | Watkins, WS; Hunt, SC; Will     | 19770777 Not a renal disease foc |
| 24 | 1 | Genotypic interactions of renin-ang    | Mehri, S; Koubaa, N; Hamr       | 20580725 Not a renal disease foc |
| 25 | 1 | Haplotype-based case-control stud      | Kobayashi, Y; Nakayama, T;      | 16097366 Not a renal disease foc |
| 26 | 1 | High aldosterone-to-renin variants     | Escher G, Cristiano M, Caus     | 19151144 Not a renal disease foc |
| 27 | 1 | Higher thrombin activatable fibrino    | Bavbek N, Ceri M, Akdeniz I     | 24580410 Not a renal disease foc |
| 28 | 1 | Identification of diuretic non-respo   | Yang, YY; Lin, HC; Lin, MW;     | 21692745 Not a renal disease foc |
| 29 | 1 | Impact of maternal angiotensinoge      | Pfab T, Stirnberg B, Sohn A,    | 17563539 Not a renal disease foc |
| 30 | 1 | Incidence of renal failure and neph    | Temme J, Peters F, Lange K,     | 22237748 Not a renal disease foc |
| 31 | 1 | Inefficient arterial hypertension cor  | Morales-Suarez-Varela, MM       | 21471972 Not a renal disease foc |
| 32 | 1 | Inhibition of tissue angiotensin con   | Montgomery HE, Kiernan L        | 9797175 Not a renal disease foc  |
| 33 | 1 | Insertion-deletion polymorphism in     | Bayoumi, RA; Simsek, M; Ya      | 16900885 Not a renal disease foc |
| 34 | 1 | Is angiotensin-converting enzyme ir    | Mao, YQ; Xu, X; Wang, X; Zh     | 26760503 Not a renal disease foc |
| 35 | 1 | Is the influence of variation in the A | Muthumala, A; Gable, DR; F      | 17624939 Not a renal disease foc |
| 36 | 1 | Juxtaglomerular cell tumor: A morp     | Kuroda, N; Maris, S; Monzo      | 22939575 Not a renal disease foc |
| 37 | 1 | Liver pyruvate kinase polymorphisn     | Wang H, Chu W, Das SK, Re       | 12196482 Not a renal disease foc |
| 38 | 1 | Long-term follow-up of patients wit    | Puricelli E, Bettinelli A, Bors | 20219833 Not a renal disease foc |
| 39 | 1 | Low-salt diet and diuretic effect on   | Manunta, P; Bianchi, G          | 14684671 Not a renal disease foc |
| 40 | 1 | Lys(173)Arg and -344T/C variants o     | Komiya I, Yamada T, Takara      | 10720581 Not a renal disease foc |
| 41 | 1 | Malignant Nephrosclerosis in a Pati    | Yamanouchi, M; Ubara, Y; I      | 26466703 Not a renal disease foc |
| 42 | 1 | Mechanisms of suppression of rena      | Shimamoto K, Masuda A, A        | 2676859 Not a renal disease foc  |
| 43 | 1 | Melatonin prevents maternal fruct      | Tain, YL; Leu, S; Wu, KLH; Le   | 24867192 Not a renal disease foc |
| 44 | 1 | Middle cerebral artery stenosis in t   | Thomas, GN; Lin, JW; Lam, '     | 12865608 Not a renal disease foc |
| 45 | 1 | miR149 rs71428439 polymorphism         | Wang Z, Wei M, Ren Y, Liu       | 25213695 Not a renal disease foc |
| 46 | 1 | Molecular genetics of the renin-an     | Corvol, P; Soubrier, F; Jeun    | 9296068 Not a renal disease foc  |
| 47 | 1 | Molecular variants of the sodium/h     | Zhu, HD; Sagnella, GA; Don      | 15201541 Not a renal disease foc |
| 48 | 1 | Molecular-Biology Of Hypertension      | Krieger, Je; Dzau, Vj           | NA Not a renal disease foc       |
| 49 |   |                                        |                                 |                                  |
| 50 |   |                                        |                                 |                                  |
| 51 |   |                                        |                                 |                                  |
| 52 |   |                                        |                                 |                                  |
| 53 |   |                                        |                                 |                                  |
| 54 |   |                                        |                                 |                                  |
| 55 |   |                                        |                                 |                                  |
| 56 |   |                                        |                                 |                                  |
| 57 |   |                                        |                                 |                                  |
| 58 |   |                                        |                                 |                                  |
| 59 |   |                                        |                                 |                                  |

|    |   |                                                                                 |                                      |          |                           |
|----|---|---------------------------------------------------------------------------------|--------------------------------------|----------|---------------------------|
| 1  |   |                                                                                 |                                      |          |                           |
| 2  | 1 | Natriuretic peptides buffer renin-angiotensin system                            | Demerath, T; Staffel, J; Schröter    | 24717731 | Not a renal disease focus |
| 3  | 1 | No Evidence for the Expression of Renin in the Kidney                           | Liktor, B; Csomor, P; Szasz, Z       | 23370555 | Not a renal disease focus |
| 4  | 1 | Nonmodulation and essential hypertension in the elderly                         | Hollenberg, NK; Williams, G          | 16672145 | Not a renal disease focus |
| 5  | 1 | Novel SLC12A3 mutations in Chinese hypertensive patients                        | Shao L, Ren H, Wang W, Zhang H       | 18287808 | Not a renal disease focus |
| 6  | 1 | Oxidative stress-related factors in essential hypertension                      | Calzavara LA, Pagnin E, Davis PA     | 12897089 | Not a renal disease focus |
| 7  | 1 | Papillary renal cell carcinoma: a clinicopathological study                     | Liu K, Ren Y, Pang L, Qi Y, Ji H     | 26339402 | Not a renal disease focus |
| 8  | 1 | Peripheral vascular disease in type 2 diabetes mellitus                         | Thomas, GN; Critchley, JAJ           | 14632699 | Not a renal disease focus |
| 9  | 1 | Pharmacogenetic association of the renin-angiotensin system                     | Arnett, DK; Davis, BR; Ford, AS      | 15967849 | Not a renal disease focus |
| 10 | 1 | Phenotype-genotype interactions of the renin-angiotensin system                 | Song, XY; Lee, SY; Ma, RCW           | 19479237 | Not a renal disease focus |
| 11 | 1 | Polymorphism in angiotensin II receptor type 1                                  | Baudin, B                            | 15640279 | Not a renal disease focus |
| 12 | 1 | Polymorphism of the aldosterone synthase gene                                   | Ko, GJ; Kang, YS; Lee, MH; Song Y    | 18771471 | Not a renal disease focus |
| 13 | 1 | Polymorphisms in genes of the renin-angiotensin system                          | Deckers, IA; van den Brandt PA       | 24978482 | Not a renal disease focus |
| 14 | 1 | Polymorphisms of the renin-angiotensin system                                   | Bofinger, A; Hawley, C; Fishbane     | 11317203 | Not a renal disease focus |
| 15 | 1 | Possible role for nephron-derived angiotensin II                                | Ramkumar, N; Stuart, D; Calzavara    | NA       | Not a renal disease focus |
| 16 | 1 | Prevalence of angiotensin converting enzyme gene polymorphisms                  | Shanmuganathan R, Kumar              | 26440392 | Not a renal disease focus |
| 17 | 1 | Randomised controlled trial of dual renin-angiotensin system inhibition         | Mogensen, CE; Neldam, S; Vague       | 11110735 | Not a renal disease focus |
| 18 | 1 | Recurrence of the R947X mutation in the renin-angiotensin system                | Fernandes-Rosa FL, de Castro         | 16757525 | Not a renal disease focus |
| 19 | 1 | Renal ACE immunohistochemical localization in essential hypertension            | Mizuiiri, S; Yoshikawa, H; Takahashi | 9469501  | Not a renal disease focus |
| 20 | 1 | Renal genetic mechanisms of essential hypertension                              | Manunta, P; Cerutti, R; Bertoni      | 9377722  | Not a renal disease focus |
| 21 | 1 | Renal haemodynamics are not related to renin-angiotensin system                 | Skov, K; Madsen, JK; Hansson         | 17083073 | Not a renal disease focus |
| 22 | 1 | Renal Mechanisms of Association between Renin-Angiotensin System                | Tomaszewski, M; Eales, J; D'Amico    | 25918036 | Not a renal disease focus |
| 23 | 1 | Renal redox-sensitive signaling, but not renin-angiotensin system               | Yogi, A; Mercure, C; Touyz, RJ       | 18195161 | Not a renal disease focus |
| 24 | 1 | Renin in blood vessels in human hypertension                                    | Taylor GM, Cook HT, Sheffer AL       | 2450464  | Not a renal disease focus |
| 25 | 1 | Renin Production in Congenital Nephropathy                                      | TSUCHIDA, Y; SHIMIZU, K; FUKUDA      | 8385325  | Not a renal disease focus |
| 26 | 1 | Renin-angiotensin system gene polymorphisms in essential hypertension           | Buraczyńska M, Pijanowski            | 14502296 | Not a renal disease focus |
| 27 | 1 | Renin-Angiotensin System Gene Polymorphisms in Essential Hypertension           | Joyce-Tan, SM; Zain, SM; Srinivasan  | NA       | Not a renal disease focus |
| 28 | 1 | Renin-Angiotensin System Polymorphisms in Essential Hypertension                | Forman, JP; Fisher, NDL; Pollock     | 18550936 | Not a renal disease focus |
| 29 | 1 | Risk given by AGT polymorphisms in essential hypertension                       | Li, Q; Sun, LJ; Du, J; Ran, PZ; Wang | 26391364 | Not a renal disease focus |
| 30 | 1 | Role of ACE inhibitors in patients with essential hypertension                  | Cordonnier, DJ; Zaoui, P; Haddad     | 11708761 | Not a renal disease focus |
| 31 | 1 | Role of GRK4 in the Regulation of Angiotensin II Receptor Type 1                | Chen, K; Fu, CJ; Chen, CY; Li, H     | 24218433 | Not a renal disease focus |
| 32 | 1 | Serum paraoxonase-1 gene polymorphisms in essential hypertension                | Atar A, Gedikbasi A, Sonmez          | 26795139 | Not a renal disease focus |
| 33 | 1 | Single Strand Conformation Polymorphism Analysis of Renin-Angiotensin System    | Bettinaglio, P; Galbusera, A         | 12270765 | Not a renal disease focus |
| 34 | 1 | Synergistic effect of alpha-adducin polymorphisms on essential hypertension     | Barlassina, C; Schork, NJ; Menni     | 10720960 | Not a renal disease focus |
| 35 | 1 | Systemic nitric oxide clamping in essential hypertension                        | Simonsen, JA; Rasmussen, I           | 19785629 | Not a renal disease focus |
| 36 | 1 | TGF-beta1 gene polymorphisms and essential hypertension                         | Ebin FA, Derici U, Gökçe             | 18197538 | Not a renal disease focus |
| 37 | 1 | The alpha-adducin Gly460Trp polymorphism in essential hypertension              | Pescatello LS, Blanchard BE          | 17472579 | Not a renal disease focus |
| 38 | 1 | The association between vitamin D polymorphisms and essential hypertension      | Maia, J; da Silva, AS; do Carmo      | 27536155 | Not a renal disease focus |
| 39 | 1 | The association of the R563Q genotype with essential hypertension               | Jones ES, Owen EP, Rayner            | 22895453 | Not a renal disease focus |
| 40 | 1 | The brain and salt-sensitive hypertension                                       | Leenen, FHH; Ruzicka, M; Hildebrandt | 11884268 | Not a renal disease focus |
| 41 | 1 | The cardiovascular system in families with essential hypertension               | Jakobsen, NFB; Laugesen, E           | NA       | Not a renal disease focus |
| 42 | 1 | The Connexin40 A96S Mutation Causes Essential Hypertension                      | Lubkemeier, I; Machura, K; Gellera   | 21597036 | Not a renal disease focus |
| 43 | 1 | The interaction of AGT and NOS3 gene polymorphisms in essential hypertension    | Gatti, RR; Santos, PS; Sena, A       | 22791701 | Not a renal disease focus |
| 44 | 1 | The M235T polymorphism in the renin-angiotensin system                          | van den Born, BJH; van Meurs         | 17921816 | Not a renal disease focus |
| 45 | 1 | The presence of PAI-1 4G/5G and A235G polymorphisms in essential hypertension   | Y, Kayata M, `                       | 21332339 | Not a renal disease focus |
| 46 | 1 | The state and responsiveness of the renin-angiotensin system                    | Price, DA; De'Oliveira, JMF; de      | 10232494 | Not a renal disease focus |
| 47 | 1 | Transforming growth factor-beta(1) gene polymorphisms in essential hypertension | Suthanthiran, M; Li, BG; Sorci       | 10725360 | Not a renal disease focus |
| 48 | 1 | Trientine and renin-angiotensin system inhibition in essential hypertension     | Moya-Olano L, Milne HM, R            | 22029676 | Not a renal disease focus |
| 49 |   |                                                                                 |                                      |          |                           |
| 50 |   |                                                                                 |                                      |          |                           |
| 51 |   |                                                                                 |                                      |          |                           |
| 52 |   |                                                                                 |                                      |          |                           |
| 53 |   |                                                                                 |                                      |          |                           |
| 54 |   |                                                                                 |                                      |          |                           |
| 55 |   |                                                                                 |                                      |          |                           |
| 56 |   |                                                                                 |                                      |          |                           |
| 57 |   |                                                                                 |                                      |          |                           |
| 58 |   |                                                                                 |                                      |          |                           |
| 59 |   |                                                                                 |                                      |          |                           |



|    |   |                                         |                                 |                                  |
|----|---|-----------------------------------------|---------------------------------|----------------------------------|
| 1  |   |                                         |                                 |                                  |
| 2  | 1 | Unclassified renal cell carcinoma: a Hu | ZY, Pang LJ, Qi Y, Kang X       | 25120763 Not a renal disease foc |
| 3  | 1 | Urinary UMOD excretion and chron        | Wu CH, Lee CT, Lee CH, Che      | 21332338 Not a renal disease foc |
| 4  | 1 | Vitamin D Deficiency in the Pathog      | Rostand, SG                     | 24929953 Not a renal disease foc |
| 5  | 1 | Vitamin D receptor gene polymorpl       | Cottone S, Guarino L, Arsen     | 25500899 Not a renal disease foc |
| 6  | 1 | Wilms' tumor protein (-KTS) modul       | Steege, A; Fahling, M; Palie    | 18496514 Not a renal disease foc |
| 7  | 1 | [A novel COL4A5 splicing mutation       | Tang Z, Dai Y, Wan Z, Zhan      | 19065523 Not English or Spanish  |
| 8  | 1 | [Angiotensin-converting enzyme ins      | Krajina-AndriceviÄ† M, Ziba     | 23120809 Not English or Spanish  |
| 9  | 1 | [Angiotensin-converting enzyme ge       | Guan T, Liu Z, Chen Z.          | 10436947 Not English or Spanish  |
| 10 | 1 | [Arterial hypertension and chronic      | Ermolenko VM, Lifshits NL,      | 7700 Not English or Spanish      |
| 11 | 1 | [Association of single nucleotide po    | Wang ZH, Chen N, Pan XX, F      | 16796905 Not English or Spanish  |
| 12 | 1 | [Association of the renin-angiotens     | BuraczyÅ„ska M, Ksiazek P,      | 12476891 Not English or Spanish  |
| 13 | 1 | [Correlation between HLA-DQA1 all       | Ren S, Tong L, Xilin G, Sui J,  | 11836690 Not English or Spanish  |
| 14 | 1 | [Correlation of cyclin D1 overexpre     | Ren YY, Du LJ, Feng ZQ, Len     | 16480581 Not English or Spanish  |
| 15 | 1 | [Gene mutation analysis of X-linked     | Song Y, Ma HW, Li F, Hu M,      | 24229582 Not English or Spanish  |
| 16 | 1 | [Genetic predisposition to systemic     | Bzoma B, Debska-SlizieÅ„ A      | 19112833 Not English or Spanish  |
| 17 | 1 | [Is PstI polymorphism of the angiot     | Grzeszczak W, Zychma M, Z       | 9499204 Not English or Spanish   |
| 18 | 1 | [Morphofunctional characteristics       | Sokolova RI, Bobusheva GS,      | 2678677 Not English or Spanish   |
| 19 | 1 | [Mutations in NPHS2 in familial ste     | Fu R, Chen XM, Wang QH, C       | 19099831 Not English or Spanish  |
| 20 | 1 | [Relationship between I/D polymor       | Moleda P, Majkowska L, Sa       | 17941464 Not English or Spanish  |
| 21 | 1 | [Renin-angiotensin system genes in      | BuraczyÅ„ska M, JÅ³Å³owiak      | 11865575 Not English or Spanish  |
| 22 | 1 | [Study on the association between       | Yang HY, Tai WL, Yuan HY, >     | 15192842 Not English or Spanish  |
| 23 | 1 | Genomics of type 1 diabetes mellit      | Nosikov, VV                     | NA Not English or Spanish        |
| 24 | 1 | A rare case of juvenile hypertensio     | Paragliola, RM; Capoluongc      | 26084817 Paediatric individuals  |
| 25 | 1 | ACE and AT1 receptor gene polymo        | Kostic, M; Stankovic, A; Zivk   | 15179569 Paediatric individuals  |
| 26 | 1 | ACE gene insertion/deletion polym       | Serdaroglu, E; Mir, S; Berde    | 16208534 Paediatric individuals  |
| 27 | 1 | ACE gene polymorphism and renal         | Haszon, I; Friedman, AL; Pa     | 12478352 Paediatric individuals  |
| 28 | 1 | ACE gene polymorphism in Egyptian       | Fahmy, ME; Fattouh, AM; H       | 18792483 Paediatric individuals  |
| 29 | 1 | ACE gene polymorphism in Turkish        | Celik US, Noyan A, Bayazit /    | 16825089 Paediatric individuals  |
| 30 | 1 | ACE I/D gene polymorphism in prim       | Oktem, F; Sirin, A; Bilge, I; E | 14986085 Paediatric individuals  |
| 31 | 1 | An insertion/deletion ACE polymor       | Kaczmarczyk, M; Loniewska       | 22674971 Paediatric individuals  |
| 32 | 1 | Angiotensin converting enzyme ger       | Bajpai, M; Pratap, A; Somite    | 14713838 Paediatric individuals  |
| 33 | 1 | Angiotensin-converting enzyme ger       | Al-Eisa, A; Haider, MZ; Sriva   | 10986863 Paediatric individuals  |
| 34 | 1 | Angiotensinogen gene T235 variant       | Gallego, PH; Shephard, N; E     | 18413222 Paediatric individuals  |
| 35 | 1 | Association of angiotensin converti     | Narasimhan, KL; Madhu, K; NA    | Paediatric individuals           |
| 36 | 1 | Association of angiotensin type 2 r     | Miranda, DM; Dos Santos, /      | 24995698 Paediatric individuals  |
| 37 | 1 | Autosomal dominant pseudohypoa          | Geller, DS; Zhang, JH; Zenn     | 16611713 Paediatric individuals  |
| 38 | 1 | DD Genotype of ACE Gene in Boys:        | Alasehirli, B; Balat, A; Buyul  | 22017506 Paediatric individuals  |
| 39 | 1 | Donor and recipient ACE I/D genoty      | Buscher, R; Nagel, D; Finkel    | 21309964 Paediatric individuals  |
| 40 | 1 | Earlier Onset of Complications in Y     | Dart, AB; Martens, PJ; Rigat    | 24130346 Paediatric individuals  |
| 41 | 1 | Effect of angiotensin-converting en     | Saber-Ayad M, Sabry S, Abc      | 20418353 Paediatric individuals  |
| 42 | 1 | Effects of genetic polymorphisms o      | Tabel, Y; Berdeli, A; Mir, S; : | 16525944 Paediatric individuals  |
| 43 | 1 | Genetic polymorphism of the renin       | Yim, HE; Jung, MI; Choi, BM     | 14764974 Paediatric individuals  |
| 44 | 1 | Genetic polymorphisms of the renin      | Frishberg, Y; Becker-Cohen,     | 9853248 Paediatric individuals   |
| 45 | 1 | Genetic risk factors in typical haem    | Taranta, A; Gianviti, A; Paln   | 19110485 Paediatric individuals  |
| 46 | 1 | Heterozygous Loss-of-Function SEC       | Bolar, NA; Golzio, C; Zivna,    | 27392076 Paediatric individuals  |
| 47 | 1 | Impact of ACE I/D gene polymorphi       | Hohenfellner, K; Wingen, A      | 11354781 Paediatric individuals  |
| 48 | 1 | Impact of common functional polyr       | Hussein, A; Elderwy, AA; As     | 25939993 Paediatric individuals  |
| 49 |   |                                         |                                 |                                  |
| 50 |   |                                         |                                 |                                  |
| 51 |   |                                         |                                 |                                  |
| 52 |   |                                         |                                 |                                  |
| 53 |   |                                         |                                 |                                  |
| 54 |   |                                         |                                 |                                  |
| 55 |   |                                         |                                 |                                  |
| 56 |   |                                         |                                 |                                  |
| 57 |   |                                         |                                 |                                  |
| 58 |   |                                         |                                 |                                  |
| 59 |   |                                         |                                 |                                  |

|    |                                          |                                   |          |                        |
|----|------------------------------------------|-----------------------------------|----------|------------------------|
| 1  | 1 Implication of genetic variations in   | Hahn, H; Ku, SE; Kim, KS; Pa      | 16133060 | Paediatric individuals |
| 2  | 1 Implications of certain genetic poly   | Ozen S, Alikasifoglu M, Saat      | 10401028 | Paediatric individuals |
| 3  | 1 Increased HLA- A*11 in Chinese chi     | Cheung W, Ren EC, Chan SF         | 11956863 | Paediatric individuals |
| 4  | 1 Low renin-angiotensin system activ     | Peruzzi, L; Lombardo, F; Ar       | 16006956 | Paediatric individuals |
| 5  | 1 Mapping candidate regions and ger      | Weber, S; Landwehr, C; Rer        | 20605837 | Paediatric individuals |
| 6  | 1 MCP1 2518 A/G polymorphism affe        | Besbas N, Kalyoncu M, Cil C       | 26335292 | Paediatric individuals |
| 7  | 1 Nitric oxide synthase gene polymor     | Balat A, Alasehirli B, Oguzka     | 17365914 | Paediatric individuals |
| 8  | 1 NPHS2 variation in Chinese souther     | Dai Y, Yang H, Gao P, Liu WI      | 25112471 | Paediatric individuals |
| 9  | 1 Polymorphisms of renin-angiotensi      | Maruyama, K; Yoshida, M; I        | 11354780 | Paediatric individuals |
| 10 | 1 Posterior urethral valves: Prelimina   | Bajpai, M; Pratap, A; Tripatl     | 15643266 | Paediatric individuals |
| 11 | 1 Prioritization and burden analysis o   | Nicolaou, N; Pulit, SL; Nijma     | 26489027 | Paediatric individuals |
| 12 | 1 Renal tubular dysgenesis, a not unc    | Lacoste M, Cai Y, Guicharna       | 16790508 | Paediatric individuals |
| 13 | 1 Renin-angiotensin gene polymorph       | Papp, F; Friedman, AL; Bere       | 12579405 | Paediatric individuals |
| 14 | 1 Renin-angiotensin system gene pol      | Liu, DS; Lu, F; Zhai, SH; Wei, NA |          | Paediatric individuals |
| 15 | 1 Renin-angiotensin system gene pol      | Ozkaya, O; Soylemezoglu, C        | 16521052 | Paediatric individuals |
| 16 | 1 Renin-angiotensin system polymor       | Pardo, R; Malaga, S; Coto, E      | 12579398 | Paediatric individuals |
| 17 | 1 Renin-angiotensin system polymor       | Liu, KP; Lin, CY; Chen, HJ; W     | 15045574 | Paediatric individuals |
| 18 | 1 Risk factors for loss of residual rena | Ha, IS; Yap, HK; Munarriz, R      | 25874598 | Paediatric individuals |
| 19 | 1 The juxtaglomerular apparatus in B     | Taugner R, Waldherr R, Sey        | 3128915  | Paediatric individuals |
| 20 | 1 The role of vitamin D receptor gene    | Goknar N, A-ktem F, Torun         | 26908058 | Paediatric individuals |
| 21 | 1 Add-on angiotensin receptor block      | Agarwal, R                        | 11380832 | Pharmaceutical drug fc |
| 22 | 1 Antiproteinuric effect of candesart    | Haneda, M; Kikkawa, R; Sak        | 15364166 | Pharmaceutical drug fc |
| 23 | 1 Application of Direct Renin Inhibitic  | Mende, CW                         | 20490905 | Pharmaceutical drug fc |
| 24 | 1 Captopril enhances transforming gr     | Di Paolo S, Schena A, Stallo      | 12499886 | Pharmaceutical drug fc |
| 25 | 1 DPP-4 Inhibition on Top of Angioter    | Alter, ML; Ott, IM; von Wek       | 23171828 | Pharmaceutical drug fc |
| 26 | 1 Effects of losartan and enalapril on   | Argani, H; Ghorbanihaghjo,        | 18261537 | Pharmaceutical drug fc |
| 27 | 1 Enalapril and losartan affect lipid p  | Rashtchizadeh, N; Aghaeish        | 17222813 | Pharmaceutical drug fc |
| 28 | 1 Losartan decreases plasma levels o     | Campistol, JM; Inigo, P; Jim      | 10432413 | Pharmaceutical drug fc |
| 29 | 1 Pentoxifylline for Renoprotection ir   | Navarro-Gonzalez, JF; Murc        | 21144773 | Pharmaceutical drug fc |
| 30 | 1 Renal implications of angiotensin r    | Hollenberg, NK                    | 11459212 | Pharmaceutical drug fc |
| 31 | 1 Renin-angiotensin system polymor       | Noroozianavval, M; Argani,        | 17524880 | Pharmaceutical drug fc |
| 32 | 1 The influence of renin-angiotensin :   | Goyache-Goni, B; Aranda-Li        | 24241364 | Pharmaceutical drug fc |
| 33 | 1 The influence of the ACE (I/D) polyr   | Luik, PT; Hoogenberg, K; Ke       | 12856080 | Pharmaceutical drug fc |
| 34 | 1 Thiazolidinediones and the renal ar    | Goenka, N; Kotonya, C; Pen        | 18230694 | Pharmaceutical drug fc |
| 35 | 2 Relationship between the renin-angi    | Wu S, Xiang K, Zheng T, Su        | 11776100 | No data                |
| 36 | 3 Chronic renal insufficiency among A    | Prasad P et al.                   | 16672053 | < 3 populations report |
| 37 | 3 M235T polymorphism in the AGT ge       | Sarkar S, Gupta V, Kumar A        | 25660845 | < 3 populations report |
| 38 | 3 Plasma renin and prorenin and reni     | Deinum J et al.                   | 10462269 | < 3 populations report |
| 39 | 3 Renin gene rs1464816 polymorphis       | Ramanathan G, Elumalai R.         | 26753721 | < 3 populations report |
| 40 | 3 Renin-angiotensin-aldosterone sys      | Mtiraoui N et al.                 | 21421655 | < 3 populations report |

1  
2  
3  
4  
5  
6  
7  
8  
9  
10  
11  
12  
13  
14  
15  
16  
17  
18  
19  
20  
21  
22  
23  
24  
25  
26  
27  
28  
29  
30  
31  
32  
33  
34  
35  
36  
37  
38  
39  
40  
41  
42  
43  
44  
45  
46  
47  
48  
49  
50  
51  
52  
53  
54  
55  
56  
57  
58  
59  
60

I study  
I study  
I study

For peer review only



1  
2  
3  
4  
5  
6  
7  
8  
9  
10  
11  
12  
13  
14  
15  
16  
17  
18  
19  
20  
21  
22  
23  
24  
25  
26  
27  
28  
29  
30  
31  
32  
33  
34  
35  
36  
37  
38  
39  
40  
41  
42  
43  
44  
45  
46  
47  
48  
49  
50  
51  
52  
53  
54  
55  
56  
57  
58  
59  
60

For peer review only

1  
2  
3  
4  
5  
6  
7  
8  
9  
10  
11  
12  
13  
14  
15  
16  
17  
18  
19  
20  
21  
22  
23  
24  
25  
26  
27  
28  
29  
30  
31  
32  
33  
34  
35  
36  
37  
38  
39  
40  
41  
42  
43  
44  
45  
46  
47  
48  
49  
50  
51  
52  
53  
54  
55  
56  
57  
58  
59  
60

For peer review only

1  
2  
3  
4  
5  
6  
7  
8  
9  
10  
11  
12  
13  
14  
15  
16  
17  
18  
19  
20  
21  
22  
23  
24  
25  
26  
27  
28  
29  
30  
31  
32  
33  
34  
35  
36  
37  
38  
39  
40  
41  
42  
43  
44  
45  
46  
47  
48  
49  
50  
51  
52  
53  
54  
55  
56  
57  
58  
59  
60

For peer review only



1  
2 ly  
3 ly  
4 ly  
5 ly  
6 ly  
7 ly  
8 ly  
9 ly  
10 ly  
11 ly  
12 ly  
13 ly  
14 ly  
15 ly  
16 ly  
17 ly  
18 ly  
19 ly  
20 ly  
21 ly  
22 ly  
23 ly  
24 ly  
25 ly  
26 ly  
27 ly  
28 ly  
29 ly  
30 ly  
31 ly  
32 ly  
33 ly  
34 us  
35 us  
36 us  
37 us  
38 us  
39 us  
40 us  
41 us  
42 us  
43 us  
44 us  
45 us  
46 us  
47 us  
48 us  
49 us  
50 us  
51 us  
52 us  
53 us  
54 us  
55 us  
56 us  
57 us  
58 us  
59  
60

For peer review only

1  
2 US  
3 US  
4 US  
5 US  
6 US  
7 US  
8 US  
9 US  
10 US  
11 US  
12 US  
13 US  
14 US  
15 US  
16 US  
17 US  
18 US  
19 US  
20 US  
21 US  
22 US  
23 US  
24 US  
25 US  
26 US  
27 US  
28 US  
29 US  
30 US  
31 US  
32 US  
33 US  
34 US  
35 US  
36 US  
37 US  
38 US  
39 US  
40 US  
41 US  
42 US  
43 US  
44 US  
45 US  
46 US  
47 US  
48 US  
49 US  
50 US  
51 US  
52 US  
53 US  
54 US  
55 US  
56 US  
57 US  
58 US  
59  
60

For peer review only

1  
2 US  
3 US  
4 US  
5 US  
6 US  
7 US  
8 US  
9 US  
10 US  
11 US  
12 US  
13 US  
14 US  
15 US  
16 US  
17 US  
18 US  
19 US  
20 US  
21 US  
22 US  
23 US  
24 US  
25 US  
26 US  
27 US  
28 US  
29 US  
30 US  
31 US  
32 US  
33 US  
34 US  
35 US  
36 US  
37 US  
38 US  
39 US  
40 US  
41 US  
42 US  
43 US  
44 US  
45 US  
46 US  
47 US  
48 US  
49 US  
50 US  
51 US  
52 US  
53 US  
54 US  
55 US  
56 US  
57 US  
58 US  
59  
60

For peer review only



1  
2 US  
3 US  
4 US  
5 US  
6 US  
7 US  
8 US  
9 US  
10 US  
11 US  
12 US  
13 US  
14 US  
15 US  
16 US  
17 US  
18 US  
19 US  
20 US  
21 US  
22 US  
23 US  
24 US  
25 US  
26 US  
27 US  
28 US  
29 US  
30 US  
31 US  
32 US  
33 US  
34 US  
35 US  
36 US  
37 US  
38 US  
39 US  
40 US  
41 US  
42 US  
43 US  
44 US  
45 US  
46 US  
47 US  
48 US  
49 US  
50 US  
51 US  
52 US  
53 US  
54 US  
55 US  
56 US  
57 US  
58 US  
59  
60

For peer review only

1  
2 US  
3 US  
4 US  
5 US  
6 US  
7 US  
8  
9  
10  
11  
12  
13  
14  
15  
16  
17  
18  
19  
20  
21  
22  
23  
24  
25  
26  
27  
28  
29  
30  
31  
32  
33  
34  
35  
36  
37  
38  
39  
40  
41  
42  
43  
44  
45  
46  
47  
48  
49  
50  
51  
52  
53  
54  
55  
56  
57  
58  
59  
60

For peer review only



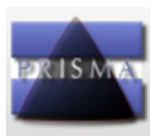

# PRISMA 2009 Flow Diagram

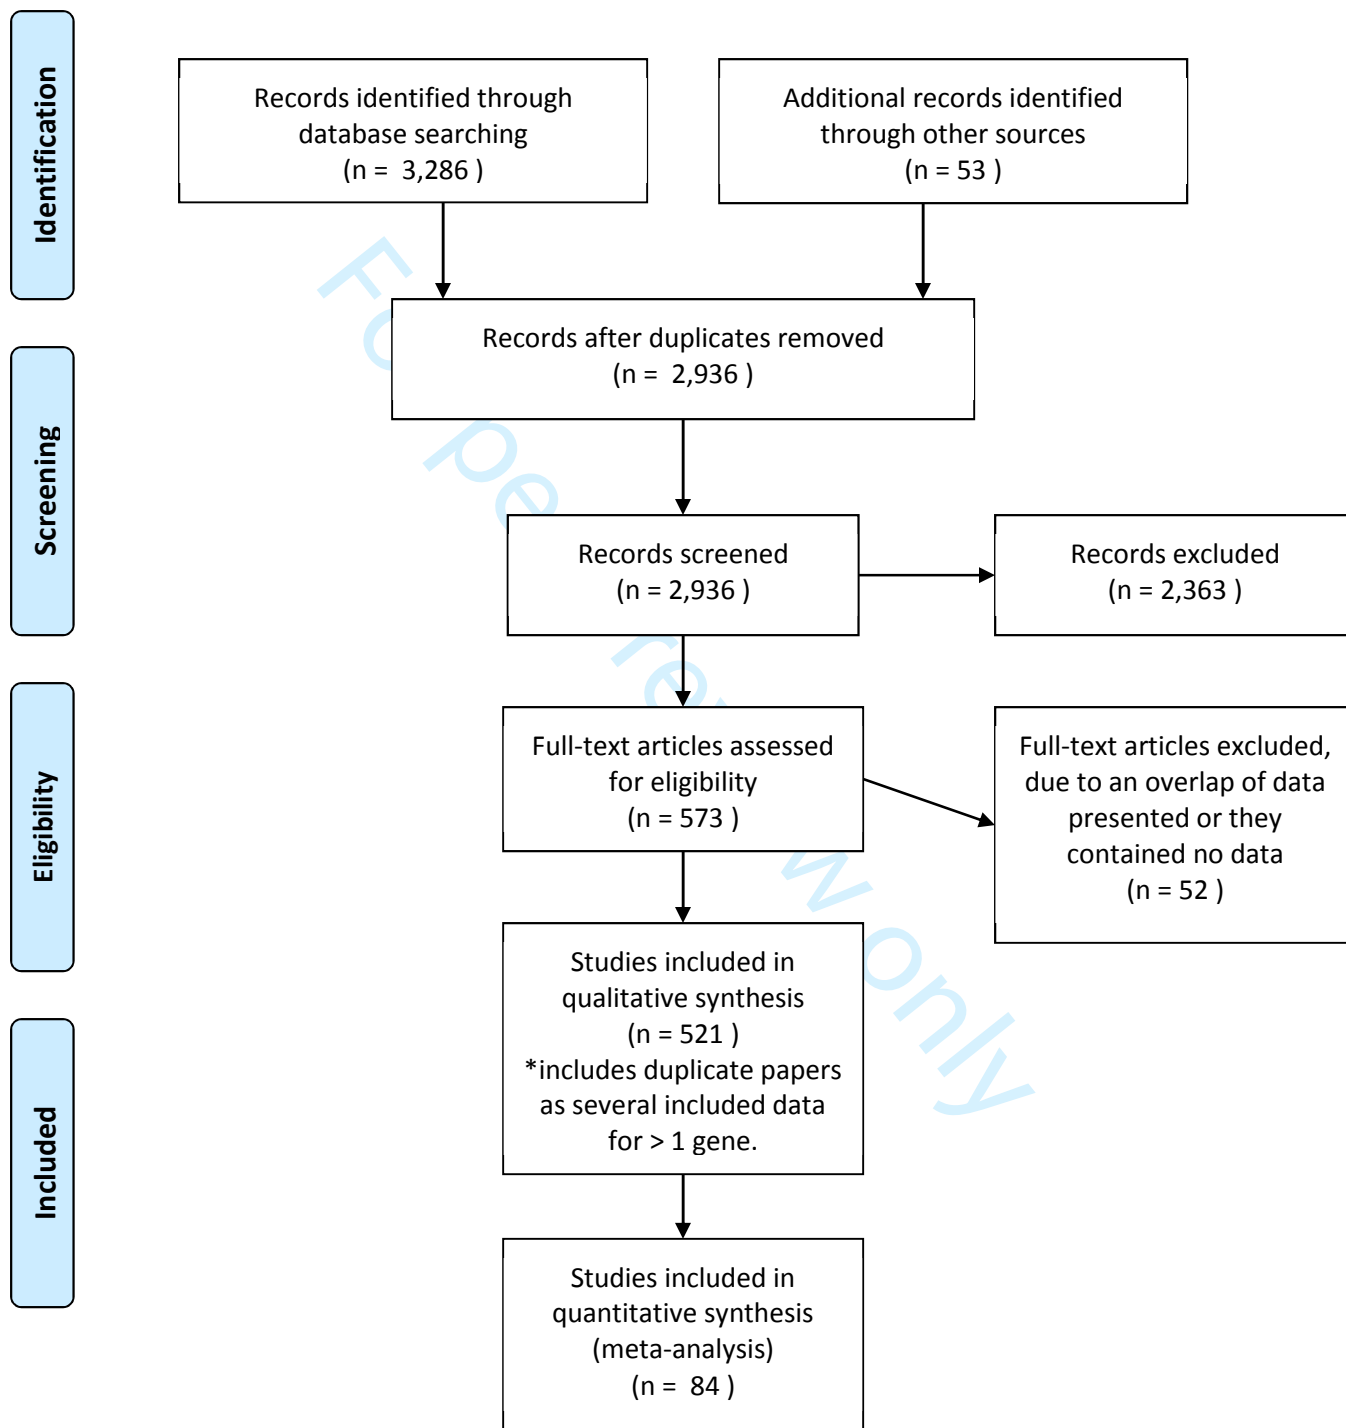

From: Moher D, Liberati A, Tetzlaff J, Altman DG, The PRISMA Group (2009). Preferred Reporting Items for Systematic Reviews and Meta-Analyses: The PRISMA Statement. PLoS Med 6(7): e1000097. doi:10.1371/journal.pmed1000097

For more information, visit [www.prisma-statement.org](http://www.prisma-statement.org).

For peer review only - <http://bmjopen.bmj.com/site/about/guidelines.xhtml>

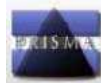

# PRISMA 2009 Checklist

| Section/topic                      | #  | Checklist item                                                                                                                                                                                                                                                                                              | Reported on page # |
|------------------------------------|----|-------------------------------------------------------------------------------------------------------------------------------------------------------------------------------------------------------------------------------------------------------------------------------------------------------------|--------------------|
| <b>TITLE</b>                       |    |                                                                                                                                                                                                                                                                                                             |                    |
| Title                              | 1  | Identify the report as a systematic review, meta-analysis, or both.                                                                                                                                                                                                                                         | 1                  |
| <b>ABSTRACT</b>                    |    |                                                                                                                                                                                                                                                                                                             |                    |
| Structured summary                 | 2  | Provide a structured summary including, as applicable: background; objectives; data sources; study eligibility criteria, participants, and interventions; study appraisal and synthesis methods; results; limitations; conclusions and implications of key findings; systematic review registration number. | 1&2                |
| <b>INTRODUCTION</b>                |    |                                                                                                                                                                                                                                                                                                             |                    |
| Rationale                          | 3  | Describe the rationale for the review in the context of what is already known.                                                                                                                                                                                                                              | 2&3                |
| Objectives                         | 4  | Provide an explicit statement of questions being addressed with reference to participants, interventions, comparisons, outcomes, and study design (PICOS).                                                                                                                                                  | 1&3                |
| <b>METHODS</b>                     |    |                                                                                                                                                                                                                                                                                                             |                    |
| Protocol and registration          | 5  | Indicate if a review protocol exists, if and where it can be accessed (e.g., Web address), and, if available, provide registration information including registration number.                                                                                                                               | 5                  |
| Eligibility criteria               | 6  | Specify study characteristics (e.g., PICOS, length of follow-up) and report characteristics (e.g., years considered, language, publication status) used as criteria for eligibility, giving rationale.                                                                                                      | 4                  |
| Information sources                | 7  | Describe all information sources (e.g., databases with dates of coverage, contact with study authors to identify additional studies) in the search and date last searched.                                                                                                                                  | 3-4                |
| Search                             | 8  | Present full electronic search strategy for at least one database, including any limits used, such that it could be repeated.                                                                                                                                                                               | 3                  |
| Study selection                    | 9  | State the process for selecting studies (i.e., screening, eligibility, included in systematic review, and, if applicable, included in the meta-analysis).                                                                                                                                                   | 3                  |
| Data collection process            | 10 | Describe method of data extraction from reports (e.g., piloted forms, independently, in duplicate) and any processes for obtaining and confirming data from investigators.                                                                                                                                  | 4                  |
| Data items                         | 11 | List and define all variables for which data were sought (e.g., PICOS, funding sources) and any assumptions and simplifications made.                                                                                                                                                                       | 4                  |
| Risk of bias in individual studies | 12 | Describe methods used for assessing risk of bias of individual studies (including specification of whether this was done at the study or outcome level), and how this information is to be used in any data synthesis.                                                                                      | 4                  |
| Summary measures                   | 13 | State the principal summary measures (e.g., risk ratio, difference in means).                                                                                                                                                                                                                               | 4                  |
| Synthesis of results               | 14 | Describe the methods of handling data and combining results of studies, if done, including measures of consistency (e.g., $I^2$ ) for each meta-analysis.                                                                                                                                                   | 4                  |



# PRISMA 2009 Checklist

Page 1 of 2

| Section/topic                 | #  | Checklist item                                                                                                                                                                                           | Reported on page # |
|-------------------------------|----|----------------------------------------------------------------------------------------------------------------------------------------------------------------------------------------------------------|--------------------|
| Risk of bias across studies   | 15 | Specify any assessment of risk of bias that may affect the cumulative evidence (e.g., publication bias, selective reporting within studies).                                                             | 4                  |
| Additional analyses           | 16 | Describe methods of additional analyses (e.g., sensitivity or subgroup analyses, meta-regression), if done, indicating which were pre-specified.                                                         | 5                  |
| <b>RESULTS</b>                |    |                                                                                                                                                                                                          |                    |
| Study selection               | 17 | Give numbers of studies screened, assessed for eligibility, and included in the review, with reasons for exclusions at each stage, ideally with a flow diagram.                                          | 5                  |
| Study characteristics         | 18 | For each study, present characteristics for which data were extracted (e.g., study size, PICOS, follow-up period) and provide the citations.                                                             | 4&5                |
| Risk of bias within studies   | 19 | Present data on risk of bias of each study and, if available, any outcome level assessment (see item 12).                                                                                                | 4-6                |
| Results of individual studies | 20 | For all outcomes considered (benefits or harms), present, for each study: (a) simple summary data for each intervention group (b) effect estimates and confidence intervals, ideally with a forest plot. | 5&6                |
| Synthesis of results          | 21 | Present results of each meta-analysis done, including confidence intervals and measures of consistency.                                                                                                  | 5&6                |
| Risk of bias across studies   | 22 | Present results of any assessment of risk of bias across studies (see Item 15).                                                                                                                          | 5&6                |
| Additional analysis           | 23 | Give results of additional analyses, if done (e.g., sensitivity or subgroup analyses, meta-regression [see Item 16]).                                                                                    | NA                 |
| <b>DISCUSSION</b>             |    |                                                                                                                                                                                                          |                    |
| Summary of evidence           | 24 | Summarize the main findings including the strength of evidence for each main outcome; consider their relevance to key groups (e.g., healthcare providers, users, and policy makers).                     | 7-9                |
| Limitations                   | 25 | Discuss limitations at study and outcome level (e.g., risk of bias), and at review-level (e.g., incomplete retrieval of identified research, reporting bias).                                            | 8-9                |
| Conclusions                   | 26 | Provide a general interpretation of the results in the context of other evidence, and implications for future research.                                                                                  | 7-9                |
| <b>FUNDING</b>                |    |                                                                                                                                                                                                          |                    |
| Funding                       | 27 | Describe sources of funding for the systematic review and other support (e.g., supply of data); role of funders for the systematic review.                                                               | 9                  |

From: Moher D, Liberati A, Tetzlaff J, Altman DG, The PRISMA Group (2009). Preferred Reporting Items for Systematic Reviews and Meta-Analyses: The PRISMA Statement. PLoS Med 6(7): e1000097. doi:10.1371/journal.pmed1000097

For more information, visit: [www.prisma-statement.org](http://www.prisma-statement.org).

Page 2 of 2

For peer review only - <http://bmjopen.bmj.com/site/about/guidelines.xhtml>

# Reporting checklist for meta-analysis of observational studies.

Based on the MOOSE guidelines.

## Instructions to authors

Complete this checklist by entering the page numbers from your manuscript where readers will find each of the items listed below.

Your article may not currently address all the items on the checklist. Please modify your text to include the missing information. If you are certain that an item does not apply, please write "n/a" and provide a short explanation.

Upload your completed checklist as an extra file when you submit to a journal.

In your methods section, say that you used the MOOSE reporting guidelines, and cite them as:

Stroup DF, Berlin JA, Morton SC, Olkin I, Williamson GD, Rennie D, Moher D, Becker BJ, Sipe TA, Thacker SB. Meta-analysis of observational studies in epidemiology: a proposal for reporting. Meta-analysis Of Observational Studies in Epidemiology (MOOSE) group. JAMA. 2000; 283(15):2008-2012.

|                     | Reporting Item                                                                                                                                                                                                                                                                                                                     | Page Number |
|---------------------|------------------------------------------------------------------------------------------------------------------------------------------------------------------------------------------------------------------------------------------------------------------------------------------------------------------------------------|-------------|
| <a href="#">#1</a>  | Identify the study as a meta-analysis of observational research                                                                                                                                                                                                                                                                    | 1           |
| <a href="#">#2</a>  | Provide a structured summary including, as applicable: background; objectives; data sources; study eligibility criteria, participants, and interventions; study appraisal and synthesis methods; results; limitations; conclusions and implications of key findings; systematic review registration number (From PRISMA checklist) | 1&2         |
| <a href="#">#3a</a> | Problem definition                                                                                                                                                                                                                                                                                                                 | 3           |
| <a href="#">#3b</a> | Hypothesis statement                                                                                                                                                                                                                                                                                                               | 2           |
| <a href="#">#3c</a> | Description of study outcomes                                                                                                                                                                                                                                                                                                      | 3           |
| <a href="#">#3d</a> | Type of exposure or intervention used                                                                                                                                                                                                                                                                                              | 3           |
| <a href="#">#3e</a> | Type of study designs used                                                                                                                                                                                                                                                                                                         | 3           |



|    |                     |                                                                                        |     |
|----|---------------------|----------------------------------------------------------------------------------------|-----|
| 1  | <a href="#">#3f</a> | Study population                                                                       | 3   |
| 2  |                     |                                                                                        |     |
| 3  | Search              | <a href="#">#4a</a> Qualifications of searchers (eg, librarians and investigators)     | 3-4 |
| 4  | strategy            |                                                                                        |     |
| 5  |                     |                                                                                        |     |
| 6  |                     |                                                                                        |     |
| 7  |                     | <a href="#">#4b</a> Search strategy, including time period included in the synthesis   | 4   |
| 8  |                     | and keywords                                                                           |     |
| 9  |                     |                                                                                        |     |
| 10 |                     |                                                                                        |     |
| 11 |                     | <a href="#">#4c</a> Effort to include all available studies, including contact with    | 4   |
| 12 |                     | authors                                                                                |     |
| 13 |                     |                                                                                        |     |
| 14 |                     | <a href="#">#4d</a> Databases and registries searched                                  | 3   |
| 15 |                     |                                                                                        |     |
| 16 |                     | <a href="#">#4e</a> Search software used, name and version, including special          | 4   |
| 17 |                     | features used (eg, explosion)                                                          |     |
| 18 |                     |                                                                                        |     |
| 19 |                     | <a href="#">#4f</a> Use of hand searching (eg, reference lists of obtained articles)   | 3   |
| 20 |                     |                                                                                        |     |
| 21 |                     | <a href="#">#4g</a> List of citations located and those excluded, including            | 3   |
| 22 |                     | justification                                                                          |     |
| 23 |                     |                                                                                        |     |
| 24 |                     | <a href="#">#4h</a> Method of addressing articles published in languages other than    | 4   |
| 25 |                     | English                                                                                |     |
| 26 |                     |                                                                                        |     |
| 27 |                     | <a href="#">#4i</a> Method of handling abstracts and unpublished studies               | 4   |
| 28 |                     |                                                                                        |     |
| 29 |                     | <a href="#">#4j</a> Description of any contact with authors                            | NA  |
| 30 |                     |                                                                                        |     |
| 31 |                     | <a href="#">#5a</a> Description of relevance or appropriateness of studies gathered    | 3&4 |
| 32 |                     | for assessing the hypothesis to be tested                                              |     |
| 33 |                     |                                                                                        |     |
| 34 |                     | <a href="#">#5b</a> Rationale for the selection and coding of data (eg, sound clinical | 3&4 |
| 35 |                     | principles or convenience)                                                             |     |
| 36 |                     |                                                                                        |     |
| 37 |                     | <a href="#">#5c</a> Documentation of how data were classified and coded (eg,           | 3&4 |
| 38 |                     | multiple raters, blinding, and interrater reliability)                                 |     |
| 39 |                     |                                                                                        |     |
| 40 |                     | <a href="#">#5d</a> Assessment of confounding (eg, comparability of cases and          | 4   |
| 41 |                     | controls in studies where appropriate)                                                 |     |
| 42 |                     |                                                                                        |     |
| 43 |                     | <a href="#">#5e</a> Assessment of study quality, including blinding of quality         | 4   |
| 44 |                     | assessors; stratification or regression on possible predictors of                      |     |
| 45 |                     | study results                                                                          |     |
| 46 |                     |                                                                                        |     |
| 47 |                     | <a href="#">#5f</a> Assessment of heterogeneity                                        | 4   |
| 48 |                     |                                                                                        |     |
| 49 |                     | <a href="#">#5g</a> Description of statistical methods (eg, complete description of    | 4-5 |
| 50 |                     |                                                                                        |     |
| 51 |                     |                                                                                        |     |
| 52 |                     |                                                                                        |     |
| 53 |                     |                                                                                        |     |
| 54 |                     |                                                                                        |     |
| 55 |                     |                                                                                        |     |
| 56 |                     |                                                                                        |     |
| 57 |                     |                                                                                        |     |
| 58 |                     |                                                                                        |     |
| 59 |                     |                                                                                        |     |
| 60 |                     |                                                                                        |     |

fixed or random effects models, justification of whether the chosen models account for predictors of study results, dose-response models, or cumulative meta-analysis) in sufficient detail to be replicated

|     |                                                                                                                           |                                 |
|-----|---------------------------------------------------------------------------------------------------------------------------|---------------------------------|
| #5h | Provision of appropriate tables and graphics                                                                              | 4-6 & additional materials      |
| #6a | Graphic summarizing individual study estimates and overall estimate                                                       | Figures & Supplementary Figures |
| #6b | Table giving descriptive information for each study included                                                              | ST4-ST6                         |
| #6c | Results of sensitivity testing (eg, subgroup analysis)                                                                    | 5                               |
| #6d | Indication of statistical uncertainty of findings                                                                         | 4-6                             |
| #7a | Quantitative assessment of bias (eg. publication bias)                                                                    | 4-6                             |
| #7b | Justification for exclusion (eg, exclusion of non-English-language citations)                                             | 3                               |
| #7c | Assessment of quality of included studies                                                                                 | 3-6                             |
| #8a | Consideration of alternative explanations for observed results                                                            | 7-8                             |
| #8b | Generalization of the conclusions (ie, appropriate for the data presented and within the domain of the literature review) | 8-9                             |
| #8c | Guidelines for future research                                                                                            | 8-9                             |
| #8d | Disclosure of funding source                                                                                              | 9                               |

Reproduced with permission from JAMA. 2000. 283(15):2008-2012. Copyright © 2000 American Medical Association. All rights reserved. This checklist can be completed online using <https://www.goodreports.org/>, a tool made by the [EQUATOR Network](#) in collaboration with [Penelope.ai](#)

# BMJ Open

## Genetic associations between genes in the renin-angiotensin-aldosterone system and renal disease: a systematic review and meta-analysis

|                                 |                                                                                                                                                                                                                                                                                                                                                                                                                                                                                                                                                                                                   |
|---------------------------------|---------------------------------------------------------------------------------------------------------------------------------------------------------------------------------------------------------------------------------------------------------------------------------------------------------------------------------------------------------------------------------------------------------------------------------------------------------------------------------------------------------------------------------------------------------------------------------------------------|
| Journal:                        | <i>BMJ Open</i>                                                                                                                                                                                                                                                                                                                                                                                                                                                                                                                                                                                   |
| Manuscript ID                   | bmjopen-2018-026777.R1                                                                                                                                                                                                                                                                                                                                                                                                                                                                                                                                                                            |
| Article Type:                   | Research                                                                                                                                                                                                                                                                                                                                                                                                                                                                                                                                                                                          |
| Date Submitted by the Author:   | 28-Jan-2019                                                                                                                                                                                                                                                                                                                                                                                                                                                                                                                                                                                       |
| Complete List of Authors:       | Smyth, Laura; Queen's University Belfast Centre for Public Health, Epidemiology and Public Health Research Group<br>Cañadas-Garre, Marisa; Queen's University Belfast Centre for Public Health, Epidemiology and Public Health Research Group<br>Cappa, Ruaidhri; Queen's University Belfast Centre for Public Health, Epidemiology and Public Health Research Group<br>Maxwell, Alexander; Queen's University Belfast Centre for Public Health, Centre for Public Health; Belfast City Hospital, Regional Nephrology Unit<br>McKnight, Amy; Queen's University Belfast, Centre for Public Health |
| <b>Primary Subject Heading</b>: | Genetics and genomics                                                                                                                                                                                                                                                                                                                                                                                                                                                                                                                                                                             |
| Secondary Subject Heading:      | Renal medicine, Public health                                                                                                                                                                                                                                                                                                                                                                                                                                                                                                                                                                     |
| Keywords:                       | CKD, NEPHROLOGY, RAAS, Meta-analysis, Renin-angiotensin-aldosterone system, Kidney                                                                                                                                                                                                                                                                                                                                                                                                                                                                                                                |
|                                 |                                                                                                                                                                                                                                                                                                                                                                                                                                                                                                                                                                                                   |

SCHOLARONE™  
Manuscripts

1  
2  
3 1 **Genetic associations between genes in the renin-angiotensin-aldosterone system and renal**  
4 2 **disease: a systematic review and meta-analysis**

5  
6 3 Laura J. Smyth\*, Marisa Cañadas-Garre, Ruaidhri C. Cappa, Alexander P. Maxwell, Amy Jayne  
7 4 McKnight

8  
9 5 Epidemiology and Public Health Research Group, Centre for Public Health, Queen's University  
10 6 Belfast, Belfast, United Kingdom

11  
12 7

13  
14 8 \*Corresponding author email: [laura.smyth@qub.ac.uk](mailto:laura.smyth@qub.ac.uk)

15  
16 9

17  
18 10 **SHORT TITLE**

19  
20 11 A meta-analysis of RAAS gene variants and CKD

21  
22 12

23  
24 13 **WORD COUNT** (excluding Abstract, Keywords, References, Figures, Tables, Statements and  
25 14 Contributions)

26  
27 15 3,599

28  
29 16

30  
31 17 **ABSTRACT**

32  
33 18 *Background*

34 19 Chronic kidney disease (CKD) is defined by abnormalities in kidney structure and/or function present  
35 20 for more than three months. Worldwide, both the incidence and prevalence rates of CKD are  
36 21 increasing. The renin-angiotensin-aldosterone system (RAAS) regulates fluid and electrolyte balance  
37 22 through the kidney. RAAS activation is associated with hypertension, which is directly implicated in  
38 23 causation and progression of CKD. RAAS blockade, using drugs targeting individual RAAS mediators  
39 24 and receptors, has proven to be reno-protective.

40  
41  
42 25 *Objectives*

43  
44 26 To assess genomic variants present within RAAS genes; *ACE*, *ACE2*, *AGT*, *AGTR1*, *AGTR2* and *REN*, for  
45 27 association with CKD.

46  
47 28 *Design and Data Sources*

48  
49 29 A systematic review and meta-analysis of observational research was performed to evaluate the RAAS  
50 30 gene polymorphisms in CKD using both PubMed and Web of Science databases with publication date  
51 31 between the inception of each database and 31/12/2018. Eligible articles included case-control  
52 32 studies of a defined kidney disease and included genotype counts.

53  
54 33 *Eligibility Criteria*

55  
56 34 Any paper was removed from the analysis if it was not written in English or Spanish, was a non-human  
57 35 study, was a paediatric study, was not a case-control study, did not have a renal disease phenotype,  
58 36 did not include data for the genes, was a gene expression based study or had a pharmaceutical drug  
59 37 focus.

## 38 *Results*

39 A total of 3,531 studies were identified, 114 of which met the inclusion criteria. Genetic variants  
40 reported in at least three independent publications for populations with the same ethnicity were  
41 determined and quantitative analyses performed.

42 Three variants returned significant results in populations with different ethnicities at  $p < 0.05$ ; *ACE*  
43 insertion, *AGT* rs699-T allele, and *AGTR1* rs5186-A allele; each variant was associated with a reduced  
44 risk of CKD development.

## 45 *Conclusions*

46 Further biological pathway and functional analyses of the RAAS gene polymorphisms will help define  
47 how variation in components of the RAAS pathway contribute to CKD.

48

## 49 **Keywords**

50 CKD, kidney, meta-analysis, RAAS, renin-angiotensin-aldosterone system

51

## 52 **ARTICLE SUMMARY**

### 53 **Strengths and limitations of the study**

- 54 • Strength: Individuals with microalbuminuria were excluded from both the case and control  
55 definitions to improve the discrimination between individuals with and without renal disease  
56 as microalbuminuria may regress, remain stable or progress to macroalbuminuria.
- 57 • Strength: Due to previously reported heterogeneity between different ethnic groups, we  
58 included this as a risk factor and performed each analysis per ethnicity.
- 59 • Limitation: Some studies in our search could not be included in quantitative analysis as they  
60 lacked information relating to genotype counts and had an unclear measure and definition of  
61 albuminuria for both cases and controls.

### 62 **Hypothesis statement**

- 63 • We hypothesise that there will be an association between genetic variants within RAAS genes  
64 and CKD.

## 65 **INTRODUCTION**

66 Chronic kidney disease (CKD) is defined as a progressive loss of renal function measured as a reduction  
67 in glomerular filtration rate (GFR) to  $< 60$  mL/min/1.73m<sup>2</sup>, or the presence of persistent urinary  
68 abnormalities including albuminuria and/or structural alterations which have been present for at least  
69 three months(1). CKD is an increasing public health issue given its associated morbidities, premature  
70 mortality and management of advanced CKD is a significant burden on health care budgets  
71 worldwide(2,3). There is substantial evidence that inherited genetic variants(4), the presence of  
72 diabetes(5) or hypertension(6) and an individual's ethnicity(7,8) directly influence the development of  
73 various CKD phenotypes.

74 The renin-angiotensin-aldosterone system (RAAS) is a homeostatic endocrine system which is of  
75 critical importance to the regulation of blood pressure and maintenance of fluid and electrolyte  
76 balance(9,10). Renin, secreted from the juxtaglomerular apparatus in response to reduced renal

77 perfusion pressure, catalyses the conversion of angiotensinogen to angiotensin I(11). Subsequently,  
 78 angiotensin I converting enzyme (*ACE*) cleaves angiotensin I to generate angiotensin II, which  
 79 regulates heart and kidney function by binding to and activating angiotensin II receptors (type I and  
 80 type II)(11,12). The angiotensin II type I receptors are responsible for multiple biologic actions of RAAS  
 81 including vasoconstriction and sodium reabsorption(11–14).

82 Increased RAAS activation is linked to progression of CKD of different aetiologies, especially diabetic  
 83 nephropathy (DN)(11,15–18), and is mediated by hypertensive injury(17) and accelerated renal  
 84 fibrosis(19). The physiological relevance of this pathway in the progression of CKD has focused  
 85 attention on RAAS components including *ACE*, angiotensin I converting enzyme 2 (*ACE2*),  
 86 angiotensinogen (*AGT*), angiotensin II receptor type 1 (*AGTR1*), angiotensin II receptor type 2 (*AGTR2*)  
 87 and renin (*REN*), as candidate genes for various CKD-related phenotypes. Multiple studies have  
 88 implicated RAAS gene variants in the progression of CKD(20–26).

89 This manuscript describes a systematic review and meta-analysis to examine published data reporting  
 90 genetic variants present within six of the RAAS candidate genes: *ACE*, *ACE2*, *AGT*, *AGTR1*, *AGTR2* and  
 91 *REN*, for a range of CKD phenotypes and ethnicities, to help define their putative roles as risk factors  
 92 for CKD.

93

## 94 METHODS

95 Search Strategy: A systematic search was undertaken following recognised methods, the Meta-  
 96 analysis of Observational Studies in Epidemiology (MOOSE) guidelines(27), by two investigators.  
 97 PubMed and Web of Science online databases were searched for studies published between the  
 98 inception of each database and 31<sup>st</sup> December 2018. All search terms are detailed in Supplementary  
 99 Table S1.

100 The general strategy of the searches was to follow the structure; (all alternative versions of each gene  
 101 name, separated by the boolean operator OR) AND (kidney OR nephrology OR nephropathy OR renal)  
 102 AND (SNP OR polymorphism OR variant OR allele OR genotype). For each search term, where an  
 103 appropriate MeSH term was available, the query included the quoted search term OR the MeSH term.  
 104 Additional filters including English OR Spanish languages, human studies, case control studies, not  
 105 clinical trials, not review articles, not a case report, not a meta-analysis were applied.

106 Reference lists from included publications were also manually searched. Two authors (LJS and MCG)  
 107 independently conducted the literature search, screened the articles and extracted the data. In the  
 108 case of any disagreement, a third author (RCC) considered the articles. A range of CKD phenotypes  
 109 were included in this analysis, the case and control definitions are included in Table 1.

110 **Table 1:** Phenotypic comparisons included in this analysis

| Case Group                                   | Control Group     |
|----------------------------------------------|-------------------|
| Autosomal dominant polycystic kidney disease | Healthy controls  |
| Atherosclerotic renal artery stenosis        | Healthy controls  |
| Balkan endemic nephropathy                   | Healthy controls  |
| Chronic glomerulonephritis                   | Healthy controls  |
| Chronic kidney disease                       | Healthy controls  |
| Diabetic nephropathy*                        | Diabetes mellitus |
| Diabetic nephropathy*                        | Healthy controls  |
| End-stage renal disease                      | Healthy controls  |

|                                                               |                                    |
|---------------------------------------------------------------|------------------------------------|
| End-stage renal disease                                       | Type 1 diabetes mellitus           |
| Focal segmental glomerulosclerosis                            | Healthy controls                   |
| Glomerulonephritis                                            | Healthy controls                   |
| Hypertension-related renal disease                            | Healthy controls with hypertension |
| Hypertension-related renal disease                            | Healthy controls                   |
| IgA Nephropathy                                               | Healthy controls                   |
| Interstitial nephritis                                        | Healthy controls                   |
| Lupus nephritis                                               | Systemic lupus erythematosus       |
| Lupus nephritis                                               | Healthy controls                   |
| Minimal change nephrotic syndrome                             | Healthy controls                   |
| Non-Balkan endemic nephropathy                                | Healthy controls                   |
| Nephroangiosclerosis                                          | Healthy controls                   |
| Polycystic kidney disease                                     | Healthy controls                   |
| Primary membranous glomerulonephritis                         | Healthy controls                   |
| Primary membranous glomerulonephritis                         | Organ donors                       |
| Renal transplant recipients                                   | Healthy controls                   |
| Renal transplant recipients                                   | Kidney Donors                      |
| Type 1 diabetic nephropathy*                                  | Type 1 diabetes mellitus           |
| Type 1 diabetic nephropathy linked to end-stage renal disease | Healthy controls                   |
| Type 1 diabetic nephropathy linked to end-stage renal disease | Type 1 diabetes mellitus           |
| Type 2 diabetic nephropathy*                                  | Type 2 diabetes mellitus           |
| Type 2 diabetic nephropathy linked to end-stage renal disease | Healthy controls                   |
| Type 2 diabetic nephropathy linked to end-stage renal disease | Type 2 diabetes mellitus           |

\* In the studies including diabetic nephropathy as cases, only individuals with reported macroalbuminuria or proteinuria were included. Individuals with microalbuminuria were excluded.

Inclusion/Exclusion Criteria: Inclusion criteria were judged against a standardised list of agreed criteria (LJS, MCG and AJM), whereby the English or Spanish language publication described an adult, human case-control study, of a defined kidney disease. In the rare instances when suspected duplicate data was identified within two or more included articles, only the article either published first, or that with the larger number of participants was included.

Articles were excluded if they included paediatric subjects, were a pharmacological based study reporting clinical trials of medications, did not contain genotypic data for the correct gene or were non-human studies.

Data extraction: Where available, the size of each study, case group disease definition and number of individuals, control group definition and number of individuals, ethnicity, genetic variant, genotype in the format of allele one–heterozygote–allele two and allele counts were recorded and calculated in spreadsheets by two authors (LJS and MCG). Articles were re-assessed where any disagreement occurred and a third reviewer was employed. Ethnicities were recorded from the articles and re-coded following the International Genome Sample Resources' online guidance(28). Where any population did not align to a listed population code, a new one was created for the purposes of this study. All ethnicity codes are available in Supplementary Table S2. The data collected was divided into disease phenotype groups to ensure a high level of homogeneity.

Statistical Analysis: Each genetic variant which had been investigated and reported in at least three independent publications for the same ethnicity and phenotype was included in quantitative statistical analyses. Review Manager (RevMan) 5.3 (The Cochrane Collaboration, The Nordic Cochrane Centre, Copenhagen, Denmark) was employed to facilitate the analysis of allele frequencies. For each SNP,



1  
2  
3 134 the total number of alleles were recorded per case and control group. Hardy Weinberg equilibrium  
4 135 was calculated for all included studies, for cases and controls separately. Statistical analyses were  
5 136 performed using the random effects model as heterogeneity was expected. For each SNP, this analysis  
6 137 provided the P value, odds ratio (OR) and 95% confidence intervals (CI). It also facilitated the  
7 138 assessment of the heterogeneity level using the  $I^2$  statistic(29). Forest plots and funnel plots were  
8 139 generated automatically to assess publication bias and the significance value was set at  $P < 0.05$  (LJS  
9 140 and RCC).

11  
12 141 The genotyping quality of the studies was assessed by reported genotype completion rate and Hardy  
13 142 Weinberg equilibrium. Phenotypes included in this analysis are shown in Table 1; individuals with  
14 143 microalbuminuria were excluded alongside the studies that focused on disease progression. No  
15 144 sensitivity analysis was performed. All study methodology conformed to the MOOSE criteria(27). No  
16 145 published protocol is available for this review. The workflow followed a consistent pattern for each  
17 146 gene. A summary of this is included in Figure 1.

#### 18 147 **Figure 1:** Workflow pattern

19  
20 148 Patient and public involvement: Neither patients nor the public were directly involved in the design of  
21 149 this study, which analysed previously published data available in the public domain.

22 150

## 23 151 **RESULTS**

24  
25 152 The database searches returned 3,531 results, 144 of which remained following the application of  
26 153 inclusion and exclusion criteria and the removal of any SNP which was not reported on at least three  
27 154 occasions. Several articles included data for more than one gene, signifying that they have emerged  
28 155 multiple times throughout the database searches; the total number of individual articles was  
29 156 therefore 114. The search strategies are included as Supplementary Figures S1a-f. All excluded studies  
30 157 are listed in Supplementary Tables S3a-f

31  
32 158 The total number of subjects analysed within these studies ( $n=114$ ) was 18,231 individuals with renal  
33 159 disease and 21,887 individuals acting as controls. For SNPs in three of the RAAS genes, *ACE2*, *AGTR2*  
34 160 and *REN*, there were less than three independent populations studied. A summary table detailing the  
35 161 main results is included as Table 2.

36 162

37 163

38 164

39 165

40 166

41 167

42 168

43 169

44 170

45

46

171 **Table 2:** Summary of the most significant result for each included gene

172

| Gene         | Articles returned (n) | Articles analysed (n) | Max. individuals in analysis (n) | Most significant result | P Value | OR (95% CL)       | I <sup>2</sup> (%) | Allele    | Average Allele Frequency - Controls |
|--------------|-----------------------|-----------------------|----------------------------------|-------------------------|---------|-------------------|--------------------|-----------|-------------------------------------|
| <i>ACE</i>   | 380                   | 95                    | 33,247                           | I/D (EAS)               | 0.008   | 0.80 (0.67, 0.94) | 68                 | Insertion | 0.62                                |
| <i>ACE2</i>  | 1556                  | 0                     | NA                               |                         | NA      | NA                | NA                 | NA        | NA                                  |
| <i>AGT</i>   | 693                   | 33                    | 13,234                           | rs699 (EUR)             | 0.002   | 0.84 (0.76, 0.94) | 0                  | T         | 0.57                                |
| <i>AGTR1</i> | 200                   | 16                    | 6917                             | rs5186 (SAS)            | 0.001   | 0.71 (0.58, 0.87) | 37                 | A         | 0.81                                |
| <i>AGTR2</i> | 29                    | 0                     | NA                               |                         | NA      | NA                | NA                 | NA        | NA                                  |
| <i>REN</i>   | 673                   | 0                     | NA                               |                         | NA      | NA                | NA                 | NA        | NA                                  |

173

174 Abbreviations: EAS, East Asian; EUR, European; NA, Not Applicable; SAS, South Asian.

175

176 **ACE**

177 A total of 15 quantitative analyses were completed for the insertion / deletion (I/D) polymorphism  
178 located within *ACE* in eight phenotypes, details of which are included in Supplementary Table S4.  
179 Three quantitative analyses returned a significant result. The first analysis comprised 11 publications,  
180 each studying an East Asian population with T2DN (type 2 diabetes and nephropathy) and compared  
181 with T2DM (type 2 diabetes mellitus without nephropathy). Figure 2a displays these results,  $P=0.009$ ;  
182  $OR=0.74$ ; 95%  $CI=0.59, 0.93$ ,  $I^2=55\%$ , showing that the presence of the insertion variant at this *ACE*  
183 locus was significantly associated with this phenotype. The insertion provides a lower risk of  
184 developing T2DN in an East Asian population as demonstrated in five studies, which contributed to  
185 51.5% of the weight in this analysis. Figure 2b shows the associated funnel plot for this analysis.

186 **Figure 2a:** Forest plot - *ACE* I/D investigation, individuals with type 2 diabetic nephropathy compared  
187 to individuals with type 2 diabetes mellitus in an East Asian population (*ACE* insertion compared to  
188 deletion).

189 **Figure 2b:** Funnel plot - *ACE* I/D investigation, individuals with type 2 diabetes and nephropathy  
190 compared to individuals with type 2 diabetes mellitus (without nephropathy) in an East Asian  
191 population (*ACE* insertion compared to deletion).

192

193 The *ACE* insertion variant was similarly significantly associated with a lower risk of T2DN compared  
194 with T2DM in a South Asian population, despite the presence of a high level of heterogeneity ( $P=0.01$ ;  
195  $OR=0.57$ ; 95%  $CI=0.37, 0.87$ ;  $I^2=89\%$ ). This was consistent with the direction of effect in four studies,  
196 which contributed to 67.7% of the weight in this analysis (Figure 2c). The funnel plot for this analysis  
197 is displayed within Figure 2d.

198 **Figure 2c:** Forest plot - *ACE* I/D investigation, individuals with type 2 diabetes and nephropathy  
199 compared to individuals with type 2 diabetes mellitus (without nephropathy) in a South Asian  
200 population (*ACE* insertion compared to deletion).

201 **Figure 2d:** Funnel plot - *ACE* I/D investigation, individuals with type 2 diabetic nephropathy compared  
202 to individuals with type 2 diabetes mellitus in a South Asian population (*ACE* insertion compared to  
203 deletion).

204

205 The comparison of East Asian individuals with end-stage renal disease (ESRD) compared to a healthy  
206 population with no evidence of renal disease also showed a significant association with moderate  
207 levels of heterogeneity ( $P=0.008$ ;  $OR=0.8$ ; 95%  $CI=0.67, 0.94$ ;  $I^2=68\%$ ). Four studies, supporting 69.7%  
208 of the weight in the analysis had shown this effect (Figure 2e). Figure 2f shows the associated funnel  
209 plot for this analysis.

210 **Figure 2e:** Forest plot - *ACE* I/D investigation, individuals with end-stage renal disease compared to  
211 healthy controls in an East Asian population (*ACE* insertion compared to deletion).

212 **Figure 2f:** Funnel plot - *ACE* I/D investigation, individuals with end-stage renal disease compared to  
213 healthy controls in an East Asian population (*ACE* insertion compared to deletion).

214

215 In each analysis (T2DN vs. T2DM; ESRD vs. normal), the presence of the *ACE* insertion was associated  
216 with a lower risk of developing the CKD phenotype in the respective populations. The non-significant

217 forest plots are included in Supplementary Figures S2a-S2l and the associated funnel plots within  
218 Supplementary Figures S3a-S3l.

219

## 220 **AGT**

221 Seven quantitative analyses were completed for rs699, where the T allele was compared to the C  
222 allele. Details of each of these comparisons are included in Supplementary Table S5. One significant  
223 result was identified - the comparison of ESRD with healthy controls in a European population. The  
224 results were ( $P=0.002$ ;  $OR=0.84$ ;  $95\% CI=0.76, 0.94$ ;  $I^2=0\%$ ) and are shown in Figure 2g. Only the study  
225 with population size over 2000 patients, supporting 46.2% of the weight in the meta-analysis, had  
226 achieved significance with the original figures. These results indicate that the presence of the T allele  
227 is associated with a lower risk of developing ESRD in this population. The funnel plot for this analysis  
228 is displayed within Figure 2h. The forest plots containing the non-significant results are included in  
229 Supplementary Figures S4a-S4f, and the associated funnel plots within Supplementary Figures S5a-  
230 S5f.

231 **Figure 2g:** Forest plot - AGT rs699 investigation, individuals with end-stage renal disease compared  
232 to healthy controls in a European population (AGT rs699 T allele compared to C allele).

233 **Figure 2h:** Funnel plot - AGT rs699 investigation, individuals with end-stage renal disease compared  
234 to healthy controls in a European population (AGT rs699 T allele compared to C allele).

235

## 236 **AGTR1**

237 Four quantitative analyses were performed for AGTR1 rs5186, comparing the A allele with the C.  
238 Details of these comparisons are included within Supplementary Table S6. One of the four studies  
239 returned a significant result for association, the comparison of T2DN with T2DM in a South Asian  
240 population ( $P=0.001$ ;  $OR=0.71$ ;  $95\% CI=0.58, 0.87$ ;  $I^2=37\%$ ). This result resembled the findings of two  
241 of the three studies which contributed 87% of the weight in the meta-analysis, as shown in Figure 2i.  
242 Figure 2j contains the associated funnel plot. These results indicate that the presence of the A allele  
243 is associated with a lower risk of developing T2DN in this population. The non-significant results in  
244 forest plot format are included in Supplementary Figures S6a-S6c and in funnel plot format within  
245 Supplementary Figures S7a-S7c.

246 **Figure 2i:** Forest plot - AGTR1 rs5186 investigation, individuals with type 2 diabetic nephropathy  
247 compared to individuals with type 2 diabetes mellitus in a South Asian population (AGTR1 rs5186 A  
248 allele compared to C allele).

249 **Figure 2j:** Funnel plot - AGTR1 rs5186 investigation, individuals with type 2 diabetes and nephropathy  
250 compared to individuals with type 2 diabetes mellitus (without nephropathy) in a South Asian  
251 population (AGTR1 rs5186 A allele compared to C allele).

252

253 Studies not complying with Hardy Weinberg equilibrium are shown in Supplementary Table S7. Allele  
254 frequencies for healthy control populations included in this analysis were assessed. None showed  
255 signs of bias in any included study, in comparison to all available dbSNP reported frequencies as shown  
256 in Supplementary Data File S1.

257

## 258 DISCUSSION

259 Investigations into RAAS genetic variants previously reported to have been associated with a range of  
260 CKD phenotypes were undertaken. A total of 3,531 studies were identified, 114 of which met the  
261 inclusion criteria. Subsequently, 26 quantitative analyses were completed for three RAAS genes where  
262 there were at least three independent population studies of the RAAS gene variants. Five significant  
263 results within three genes were obtained at the significance level  $p < 0.05$ , each revealing an association  
264 with CKD.

265 *ACE* is encoded by *DCP1* and is a key component of the RAAS. It catalyses the modification of  
266 angiotensin I to II, which is more biologically active(30). *ACE* is the most frequently studied gene of the  
267 RAAS(31). First sequenced in 1992(32), this 287 bp ALU repetitive element at intron 16(32) is located  
268 on chromosome 17 and is represented by four individual SNPs, rs4646994, rs1799752, rs4340 and  
269 rs13447447. Further understanding of its genetic architecture and disease associations may enable  
270 patient groups to benefit from targeted therapies with ACE inhibitors(33).

271 Since 1994, the association of *ACE* and DN has been rigorously investigated(33,34), with studies  
272 returning conflicting results. A meta-analysis undertaken in 2005 by Ng and colleagues(35) reported a  
273 statistically significant result wherein the *ACE* insertion was associated with protection from  
274 development of diabetic nephropathy in Asians and Caucasians. A second meta-analysis undertaken  
275 in 2012 also identified an association between the *ACE* I/D polymorphism and the development of  
276 diabetic nephropathy to ESRD, in that the presence of the deletion was associated with ESRD  
277 susceptibility(36). Despite having differences in the inclusion criteria to our meta-analysis, in that  
278 these investigations did not include any article published since 2011(35,36) and included individuals  
279 with microalbuminuria as cases(35), we returned similar results to the 2005 previous meta-analysis.  
280 Including individuals with microalbuminuria in the control population may cause challenges with  
281 phenotype definition as microalbuminuria may regress, remain stable, or progress to  
282 macroalbuminuria(37–39) over time. Individuals with microalbuminuria were therefore excluded  
283 from both case and control definitions to clarify the phenotypes in our review.

284 In our meta-analysis of *ACE*, which comprised 15,265 individuals with CKD and 18,474 individuals as  
285 controls from 98 population groups, we identified three significant associations of the *ACE* I/D  
286 polymorphism with CKD. Due to previously reported heterogeneity between different ethnic  
287 groups(35), we included this as a risk factor and performed each analysis per ethnicity (Table S2).  
288 Despite some of the allele frequency distributions varying across different ethnicities, the direction of  
289 the effect was consistent among the different ethnicities: where population had different MAFs, they  
290 often reported similar odds ratios in the meta-analysis.

291 Firstly, comparisons between T2DN and T2DM in East Asian and South Asian populations returned  
292 significant results highlighting a protective effect of the *ACE* insertion in the development of diabetic  
293 nephropathy ( $P=0.009$  and  $P=0.01$  respectively). This result was mimicked in the comparison of  
294 individuals with ESRD, which was not caused by diabetic nephropathy, and healthy control individuals  
295 in an East Asian population ( $P=0.008$ ). The *ACE* I/D polymorphism remains a well characterised genetic  
296 locus associated with the progression of diabetic nephropathy.

297 *AGT* encodes the AGT glycoprotein, which is created in the liver and facilitates the creation of  
298 angiotensin I(11,40). It is located on chromosome 1. Several investigations have been conducted into  
299 the *AGT* gene variants and their association with risk of CKD(40–43). Among these, Zhou and  
300 colleagues undertook a meta-analysis investigation into *AGT* rs699 and its association with ESRD(40).  
301 The results of this study are agreement with ours in relation to the European ethnicity. Our meta-

1  
2  
3 302 analysis encompassing 5, 463 individuals with renal disease and 6,385 individuals without; the T allele  
4 303 provided a protective effect in ESRD development ( $P=0.002$ ) within this European population.

6 304 In European and Middle Eastern populations, the allele distribution of rs699 were very similar for the  
7 305 comparison of T2DN vs T2DM, yet different from the East Asian population. This may have had an  
8 306 impact on the results, potentially limiting the robustness of association analyses across ethnicities.

10 307 The *AGTR1* gene has been shown to be involved in the regulation of blood pressure, fluid and  
11 308 electrolyte balance(11). It may also have a role in inflammation and vasoconstriction(44). SNP rs5186,  
12 309 an AC nucleotide substitution at position 1166 in the 3' untranslated region of chromosome 3, is  
13 310 reportedly able to be recognised by microRNA-155. When the A allele is present at this locus,  
14 311 microRNA-155 is able to undergo complementary base-pairing with *AGTR1* messenger RNA to  
15 312 suppress translation. However this is not possible when the alternative C allele is present, resulting in  
16 313 increased *AGTR1* protein levels(45). This interplay may affect blood pressure regulation and warrants  
17 314 further investigation(45).

21 315 Previous studies have identified associations between rs5186 in *AGTR1* and diseases including  
22 316 coronary artery disease(46), systemic lupus erythematosus(47) and cancer(48). Several smaller  
23 317 studies had also been undertaken to assess links between this gene and renal disease(25,49–54). We  
24 318 conducted this study to provide a clearer understanding of the effect of this SNP on CKD.

26 319 This meta-analysis of *AGTR1* variants included 3,197 individuals with renal disease and 3,720 controls  
27 320 investigating rs5186. One significant result was identified; that the presence of an A allele at this locus  
28 321 provided a lower risk of developing T2DN in a South Asian population ( $P=0.001$ ).

30 322 One meta-analysis published in 2014(55) assessed *AGTR1* in individuals with CKD, ESRD, IgA  
31 323 nephropathy or vesicoureteral reflux. This meta-analysis identified that rs5186 was not associated  
32 324 with any of these diseases, which corresponds to the results from our investigation.

35 325 The three remaining RAAS genes included in this meta-analysis, *ACE2*, *AGTR2* and *REN*, have not been  
36 326 researched as extensively as the *ACE*, *AGT* and *AGTR1* for associations with renal disease. Very few  
37 327 articles were identified describing genetic association studies for these genes at the data extraction  
38 328 stage of the analysis, and those that were, were removed prior to the quantitative analysis stage,  
39 329 mainly due to the inclusion of paediatric individuals or non-human approaches, as outlined in Figures  
40 330 S1b, S1e and S1f. Further research into the *ACE2*, *AGTR2* and *REN* genes and their polymorphisms  
41 331 should be undertaken to elucidate their role in CKD and ESRD.

44 332 Some studies in our search could not be included in quantitative analysis as they lacked information  
45 333 relating to genotype counts and had an unclear measure and definition of albuminuria for both cases  
46 334 and controls, which could constitute a limitation. Results from GWAS studies would have strengthened  
47 335 the analysis, but unfortunately they usually only report significant SNPs. Absolute frequencies are not  
48 336 usually reported at individual SNP level for such large-scale studies. Publication bias was reported in  
49 337 two of our quantitative analyses, but was not found in the analyses which provided our significant  
50 338 results. Lack of clarity in phenotype definitions, along with unclear descriptions of ethnicities,  
51 339 inherently challenge the use of meta-analyses of different populations as a valid instrument to  
52 340 uncover robust associations. CKD itself has a range of causes including glomerular damage and  
53 341 declining eGFR without albuminuria. Other confounding factors such as hypertension and  
54 342 cardiovascular disease, and a lack of prospective follow up of included individuals, which would ensure  
55 343 phenotypes are robust and stable, may also cause conflicting results.

59 344  
60



1  
2  
3 345 **CONCLUSION**  
4 346

5 347 This meta-analysis of the RAAS pathway genes and their association with renal disease has provided  
6 348 evidence for five significant associations with individually small effect sizes that may cumulatively  
7 349 contribute to dysfunction of the RAAS pathway leading to kidney disease. The insertion in *ACE I/D*  
8 350 polymorphism was a protection factor for the development of diabetic nephropathy in individuals  
9 351 with type 2 diabetes mellitus from both East and South Asian origin, and for ESRD in an East Asian  
10 352 population. In Europeans, the T allele of the *AGT* rs699 conferred a lower risk of ESRD development  
11 353 in healthy population. The A allele in *AGTR1* rs5186 acted as a protection factor for renal disease  
12 354 development in South Asian population.

13  
14  
15  
16 355 Further study into the specific ethnicities and investigations into a broader range of RAAS linked genes,  
17 356 or a deeper analysis of them including investigations of more variants, may pinpoint the molecular  
18 357 basis underlying the role of pathway in kidney disease. Network analysis and functional studies  
19 358 enlightening the mechanisms involved ultimately will be required to complete the picture of RAAS  
20 359 variation in renal traits.  
21  
22  
23 360  
24  
25  
26  
27  
28  
29  
30  
31  
32  
33  
34  
35  
36  
37  
38  
39  
40  
41  
42  
43  
44  
45  
46  
47  
48  
49  
50  
51  
52  
53  
54  
55  
56  
57  
58  
59  
60



1  
2  
3 361 **STATEMENTS AND CONTRIBUTIONS**  
4

5 362

6  
7 363 **Acknowledgements and Funding**

8  
9 364 This work has been partly funded by the Medical Research Council (Award reference MC\_PC\_15025)  
10 365 and the Public Health Agency R&D Division (Award Reference STL/4760/13). LJS is the recipient of a  
11 366 Northern Ireland Kidney Research Fund Fellowship. MCG is funded by a Science Foundation Ireland-  
12 367 Department for the Economy (SFI-DfE) Investigator Program Partnership Award (15/IA/3152). RCC is  
13 368 the recipient of a Department for the Economy (DfE) PhD studentship. None of the funding bodies  
14 369 had a role in the study design or analysis.  
15 370

16  
17 371 **Statement of competing interests**

18  
19 372 The authors declare that they have no competing interests.  
20  
21 373

22  
23 374 **Availability of data and material**

24  
25 375 The datasets generated and/or analysed during the current study are available from the  
26 376 corresponding author on reasonable request.  
27

28 377

29  
30 378 **Author contributions**

31  
32 379 LJS formulated the research plan, conducted the analysis, interpreted the data, drafted the manuscript  
33 380 and revised the manuscript.

34  
35 381 MCG conducted the analysis, interpreted the data and revised the manuscript.

36  
37 382 RCC conducted the analysis, interpreted the data and revised the manuscript.

38  
39 383 APM acquired the funding, interpreted the data, managed the project and revised the manuscript.

40  
41 384 AJM acquired the funding, formulated the research plan, interpreted the data, managed the project  
42 385 and revised the manuscript.

43  
44 386 All authors read and approved the final manuscript.  
45  
46  
47  
48  
49  
50  
51  
52  
53  
54  
55  
56  
57  
58  
59  
60

388 **REFERENCES**

- 389 1. Levey AS, Coresh J. Chronic kidney disease. *Lancet*. 2012 Jan 14;379(9811):165–80.
- 390 2. Glasscock RJ, Warnock DG, Delanaye P. The global burden of chronic kidney disease:  
391 Estimates, variability and pitfalls. *Nat Rev Nephrol*. 2017;13(2):104–14.
- 392 3. Mills KT, Xu Y, Zhang W, Bundy JD, Chen C-S, Kelly TN, et al. A systematic analysis of world-  
393 wide population-based data on the global burden of chronic kidney disease in 2010 HHS  
394 Public Access. *Kidney Int*. 2015;88(5):950–7.
- 395 4. Smyth LJ, Duffy S, Maxwell AP, McKnight AJ. Genetic and epigenetic factors influencing  
396 chronic kidney disease. *Am J Physiol Renal Physiol*. 2014;307(7):F757-76.
- 397 5. Brancati FL, Whelton PK, Randall BL, Neaton JD, Stamler J, Klag MJ. Risk of end-stage renal  
398 disease in diabetes mellitus: a prospective cohort study of men screened for MRFIT. Multiple  
399 Risk Factor Intervention Trial. *JAMA*. 1997;278(23):2069–74.
- 400 6. Klag MJ, Whelton PK, Randall BL, Neaton JD, Brancati FL, Ford CE, et al. Blood pressure and  
401 end-stage renal disease in men. *N Engl J Med*. 1996;334(1):13–8.
- 402 7. Cowie CC, Port FK, Wolfe RA, Savage PJ, Moll PP, Hawthorne VM. Disparities in Incidence of  
403 Diabetic End-Stage Renal Disease According to Race and Type of Diabetes. *N Engl J Med*.  
404 1989;321(16):1074–9.
- 405 8. Mathur R, Dreyer G, Yaqoob MM, Hull SA. Ethnic differences in the progression of chronic  
406 kidney disease and risk of death in a UK diabetic population: an observational cohort study.  
407 *BMJ Open*. 2018;8(3):e020145.
- 408 9. Velez JCQ. The importance of the intrarenal renin-angiotensin system. *Nat Clin Pr Nephrol*.  
409 2009;5(2):89–100.
- 410 10. Nishiyama A, Kim-Mitsuyama S. New Approaches to Blockade of the Renin–Angiotensin–  
411 Aldosterone System: Overview of Regulation of the Renin–Angiotensin–Aldosterone System. *J*  
412 *Pharmacol Sci*. 2010;113(4):289–91.
- 413 11. Remuzzi G, Perico N, Macia M, Ruggenenti P. The role of renin-angiotensin-aldosterone  
414 system in the progression of chronic kidney disease. *Kidney Int Suppl*. 2005;68(99):S57–65.
- 415 12. Nishiyama A, Kobori H. Independent regulation of renin–angiotensin–aldosterone system in  
416 the kidney. *Clin Exp Nephrol*. 2018;doi: 10.1007/s10157-018-1567-1.
- 417 13. Carey RM. The intrarenal renin-angiotensin system in hypertension. *Adv Chronic Kidney Dis*.  
418 2015;22(3):204–10.
- 419 14. Zhang F, Liu H, Liu D, Liu Y, Li H, Tan X, et al. Effects of RAAS Inhibitors in Patients with Kidney  
420 Disease. *Curr Hypertens Rep*. 2017;19(9):72.
- 421 15. Coll E, Campos B, González-Núñez D, Botey A, Poch E. Association between the A1166C  
422 polymorphism of the angiotensin II receptor type 1 and progression of chronic renal  
423 insufficiency. *J Nephrol*. 2003;16(3):357–64.
- 424 16. Bermejo S, García CO, Rodríguez E, Barrios C, Otero S, Mojal S, et al. The renin-angiotensin-  
425 aldosterone system blockade in patients with advanced diabetic kidney disease. *Nefrologia*.  
426 2017;32(2):197–206.
- 427 17. Yamout H, Lazich I, Bakris GL. Blood pressure, hypertension, RAAS blockade, and drug therapy  
428 in diabetic kidney disease. *Adv Chronic Kidney Dis*. 2014;21(3):281–6.

- 1  
2  
3 429 18. Rahimi Z. The Role of Renin Angiotensin Aldosterone System Genes in Diabetic Nephropathy.  
4 430 Can J Diabetes. 2016;40(2):178–83.  
5  
6 431 19. Mezzano S a, Ruiz-Ortega M, Egido J. Angiotensin II and renal fibrosis. Hypertension.  
7 432 2001;38(3 Pt 2):635–8.  
8  
9 433 20. Kelly TN, Raj D, Rahman M, Kretzler M, Kalleem RR, Ricardo AC, et al. The role of renin-  
10 434 angiotensin-aldosterone system genes in the progression of chronic kidney disease: Findings  
11 435 from the Chronic Renal Insufficiency Cohort (CRIC) study. Nephrol Dial Transplant.  
12 436 2015;30(10):1711–8.  
13  
14 437 21. Ramanathan G, Elumalai R, Periyasamy S, Lakkakula BVKS. Renin gene rs1464816  
15 438 polymorphism contributes to chronic kidney disease progression in ADPKD. J Biomed Sci.  
16 439 2016;23(1):1–7.  
17  
18 440 22. Kawada N, Moriyama T, Yokoyama K, Yamauchi A, Ando A, Mikami H, et al. Renin-angiotensin  
19 441 system component gene polymorphisms in Japanese maintenance haemodialysis patients.  
20 442 Nephrology. 1997;3(4):521–6.  
21  
22 443 23. Parsa A, Lovett DH, Peden EA, Zhu L, Seldin MF, Criswell LA. Renin-angiotensin system gene  
23 444 polymorphisms predict the progression to renal insufficiency among Asians with lupus  
24 445 nephritis. Genes Immun. 2005;6(3):217–24.  
25  
26 446 24. Özkaya O, Söylemezoğlu O, Gönen S, Misirlioğlu M, Tuncer S, Kalman S, et al. Renin-  
27 447 angiotensin system gene polymorphisms: Association with susceptibility to Henoch-Schonlein  
28 448 purpura and renal involvement. Clin Rheumatol. 2006;25(6):861–5.  
29  
30 449 25. Lau YK, Woo KT, Choong HL, Zhao Y, Tan HB, Chong SMCF, et al. Renin-angiotensin system  
31 450 gene polymorphisms: Its impact on IgAN and its progression to end-stage renal failure among  
32 451 Chinese in Singapore. Nephron - Physiol. 2004;97(1):1–9.  
33  
34 452 26. Mtiraoui N, Ezzidi I, Turki A, Chaieb M, Mahjoub T, Almawi WY. Renin-angiotensin-  
35 453 aldosterone system genotypes and haplotypes affect the susceptibility to nephropathy in  
36 454 type 2 diabetes patients. J Renin Angiotensin Aldosterone Syst. 2011;12(4):572–80.  
37  
38 455 27. Stroup DF, Berlin JA, Morton SC, Olkin I, Williamson GD, Rennie D, et al. Meta-analysis of  
39 456 observational studies in epidemiology: a proposal for reporting. Meta-analysis Of  
40 457 Observational Studies in Epidemiology (MOOSE) group. JAMA. 2000;283(15):2008–12.  
41  
42 458 28. International Genome Population [Internet]. Available from:  
43 459 [www.internationalgenome.org/category/population](http://www.internationalgenome.org/category/population)  
44  
45 460 29. Higgins JPT, Thompson SG, Deeks JJ, Altman DG. Measuring inconsistency in meta-analyses.  
46 461 BMJ Br Med J. 2003;327(7414):557–60.  
47  
48 462 30. Rieder MJ, Taylor SL, Clark AG, Nickerson DA. Sequence variation in the human angiotensin  
49 463 converting enzyme. Nat Genet. 1999;22(1):59–62.  
50  
51 464 31. Moon JY. Recent update of renin-angiotensin-aldosterone system in the pathogenesis of  
52 465 hypertension. Electrolyte Blood Press. 2013;11(2):41–5.  
53  
54 466 32. Rigat B, Hubert C, Corvol P, Soubrier R. PCR detection of the insertion/deletion polymorphism  
55 467 of the human angiotensin converting enzyme gene (DCP1) (dipeptidyl carboxypeptidase 1).  
56 468 Nucleic Acids Res. 1992;20(6):1433.  
57  
58 469 33. Ha S-K. ACE Insertion/Deletion Polymorphism and Diabetic Nephropathy: Clinical Implications  
59 470 of Genetic Information. J Diabetes Res. 2014;2014:1–8.  
60

- 1  
2  
3 471 34. Marre M, Bernadet P, Gallois Y, Savagner F, Guyene TT, Hallab M, et al. Relationships  
4 472 between angiotensin I converting enzyme gene polymorphism, plasma levels, and diabetic  
5 473 retinal and renal complications. *Diabetes*. 1994;43(3):384–8.
- 7 474 35. Ng DPK, Tai BC, Koh D, Tan KW, Chia KS. Angiotensin-I converting enzyme insertion/deletion  
8 475 polymorphism and its association with diabetic nephropathy: A meta-analysis of studies  
9 476 reported between 1994 and 2004 and comprising 14,727 subjects. *Diabetologia*.  
11 477 2005;48(5):1008–16.
- 12 478 36. Yu Z-Y, Chen L-S, Zhang L-C, Zhou T-B. Meta-analysis of the relationship between ACE I/D  
13 479 gene polymorphism and end-stage renal disease in patients with diabetic nephropathy.  
14 480 *Nephrology (Carlton)*. 2012;17(5):480–7.
- 16 481 37. Caramori ML, Fioretto P, Mauer M. The need for early predictors of diabetic nephropathy  
17 482 risk: Is albumin excretion rate sufficient? *Diabetes*. 2000;49(9):1399–408.
- 19 483 38. Perkins BA, Ficociello LH, Silva KH, Finkelstein DM, Warram JH, Krolewski AS. Regression of  
20 484 microalbuminuria in type 1 diabetes. *N Engl J Med*. 2003;348(23):2285–93.
- 22 485 39. Zelmanovitz T, Gerchman F, Balthazar AP, Thomazelli FC, Matos JD, Canani LH. Diabetic  
23 486 nephropathy. *Diabetol Metab Syndr*. 2009;1(1):10.
- 25 487 40. Zhou T-B, Yin S-S, Qin Y-H. Association of angiotensinogen M235T gene polymorphism with  
26 488 end-stage renal disease risk: a meta-analysis. *Mol Biol Rep*. 2013;40(2):765–72.
- 28 489 41. Turgut S, AkIn F, Akcllar R, Ayada C, Turgut G. Angiotensin converting enzyme I/D,  
29 490 angiotensinogen M235T and AT1-R A/C1166 gene polymorphisms in patients with  
30 491 acromegaly. *Mol Biol Rep*. 2011;38(1):569–76.
- 32 492 42. Wang YJ, Pan Y. Angiotensinogen gene M235T polymorphism and risk of coronary artery  
33 493 disease: a meta-analysis. *Mol Med Rep*. 2012;6(4):884–8.
- 35 494 43. Lin R, Lei Y, Yuan Z, Ju H, Li D. Angiotensinogen Gene M235T and T174M Polymorphisms and  
36 495 Susceptibility of Pre-Eclampsia: A Meta-Analysis. *Ann Hum Genet*. 2012;76(5):377–86.
- 38 496 44. Chow BSM, Allen TJ. Angiotensin II type 2 receptor (AT2R) in renal and cardiovascular disease.  
39 497 *Clin Sci*. 2016;130(15):1307–26.
- 41 498 45. Ceolotto G, Papparella I, Bortoluzzi A, Strapazzon G, Ragazzo F, Bratti P, et al. Interplay  
42 499 between miR-155, AT1R A1166C polymorphism, and AT1R expression in young untreated  
43 500 hypertensives. *Am J Hypertens*. 2011;24(2):241–6.
- 45 501 46. Duan LJ, Wang XD. Analysis of correlations between coronary heart disease and haplotypes of  
46 502 the angiotensin II receptor type 1 (AGTR1) gene. *Genet Mol Res*. 2016;15(1):doi:  
47 503 10.4238/gmr.15017457.
- 49 504 47. Baniamerian H, Bahrehmand F, Vaisi-Raygani A, Rahimi Z, Pourmotabbed T. Angiotensin type  
50 505 1 receptor A1166C polymorphism and systemic lupus erythematosus: correlation with  
51 506 cellular immunity and oxidative stress markers. *Lupus*. 2017;26(14):1534–9.
- 53 507 48. Pringle KG, Delforce SJ, Wang Y, Ashton KA, Proietto A, Otton G, et al. Renin–angiotensin  
54 508 system gene polymorphisms and endometrial cancer. *Endocr Connect*. 2016;5(3):128–35.
- 56 509 49. Gao J, Yu Q-L, Fu R-G, Wei L-T, Wang M, Dong F-M, et al. Lack of Association Between  
57 510 Polymorphisms in AGT and ATR1 and IgA Nephropathy in a Chinese Population. *Genet Test*  
58 511 *Mol Biomarkers*. 2015;19(12):710–3.
- 59 512 50. Huang HD, Lin FJ, Li XJ, Wang LR, Jiang GR. Genetic polymorphisms of the renin-angiotensin-

- 1  
2  
3 513 aldosterone system in Chinese patients with end-stage renal disease secondary to IgA  
4 514 nephropathy. *Chin Med J (Engl)*. 2010;123(22):3238–42.
- 5  
6 515 51. Kim SM, Chin HJ, Oh YK, Kim YS, Kim S, Lim CS. Blood pressure-related genes and the  
7 516 progression of IgA nephropathy. *Nephron Clin Pr*. 2009;113(4):c301-8.
- 8  
9 517 52. Savage DA, Feeney SA, Fogarty DG, Maxwell AP. Risk of developing diabetic nephropathy is  
10 518 not associated with synergism between the angiotensin II (type 1) receptor C1166 allele and  
11 519 poor glycaemic control. *Nephrol Dial Transpl*. 1999;14(4):891–4.
- 12  
13 520 53. Van Ittersum FJ, De Man AME, Thijssen S, De Knijff P, Slagboom E, Smulders Y, et al. Genetic  
14 521 polymorphisms of the renin-angiotensin system and complications of insulin-dependent  
15 522 diabetes mellitus. *Nephrol Dial Transplant*. 2000;15(7):1000–7.
- 16  
17 523 54. Prasad P, Tiwari AK, Kumar KP, Ammini A, Gupta A, Gupta R, et al. Chronic renal insufficiency  
18 524 among Asian Indians with type 2 diabetes: I. Role of RAAS gene polymorphisms. *BMC Med*  
19 525 *Genet*. 2006;7(1):42.
- 20  
21 526 55. Braliou GG, Grigoriadou AMG, Kontou PI, Bagos PG. The role of genetic polymorphisms of the  
22 527 Renin-Angiotensin System in renal diseases: A meta-analysis. *Comput Struct Biotechnol J*.  
23 528 2014;10(7):1–7.
- 24  
25 529

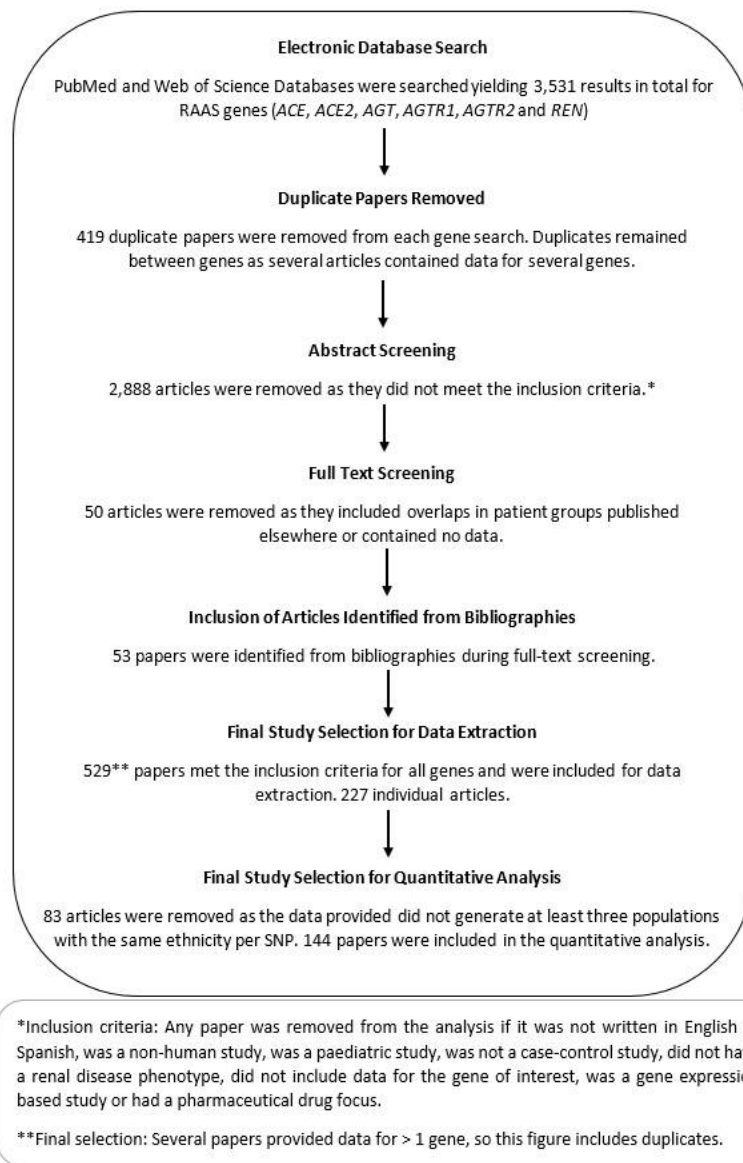

Figure 1: Workflow pattern

55x76mm (300 x 300 DPI)

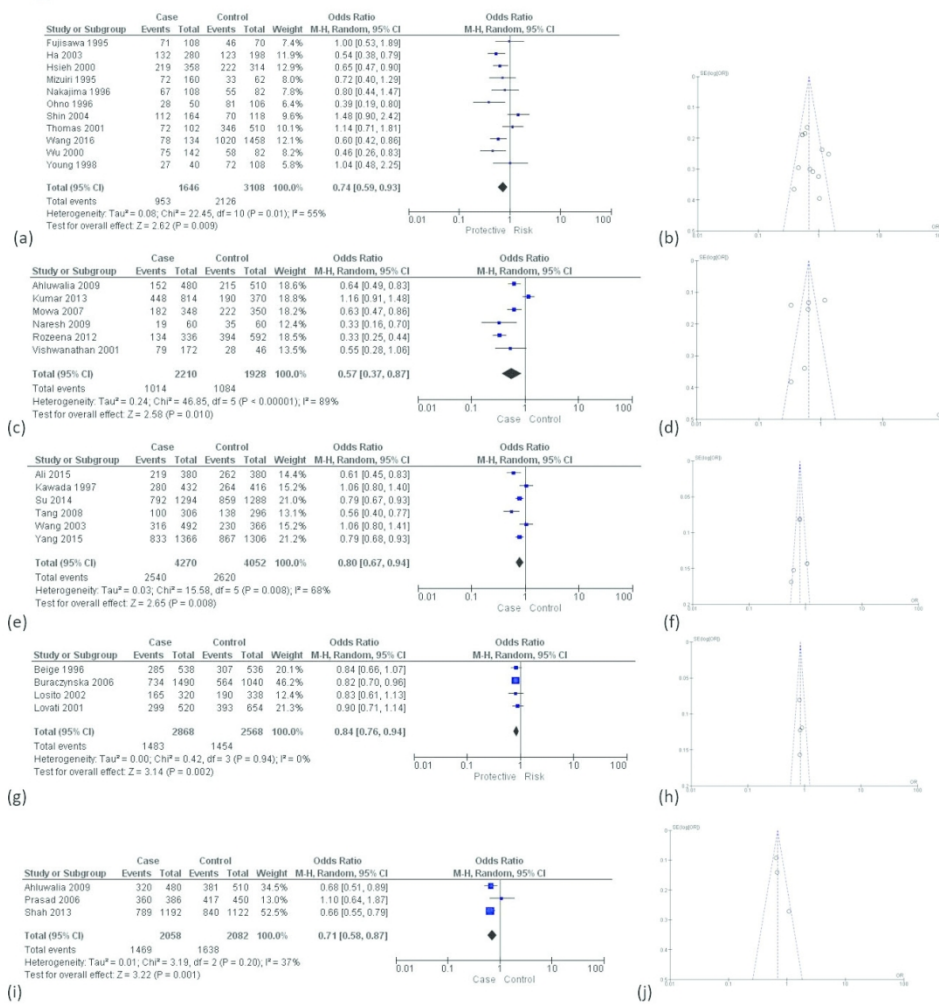

Figure 2: Forest and funnel plots for statistically significant results

119x124mm (300 x 300 DPI)



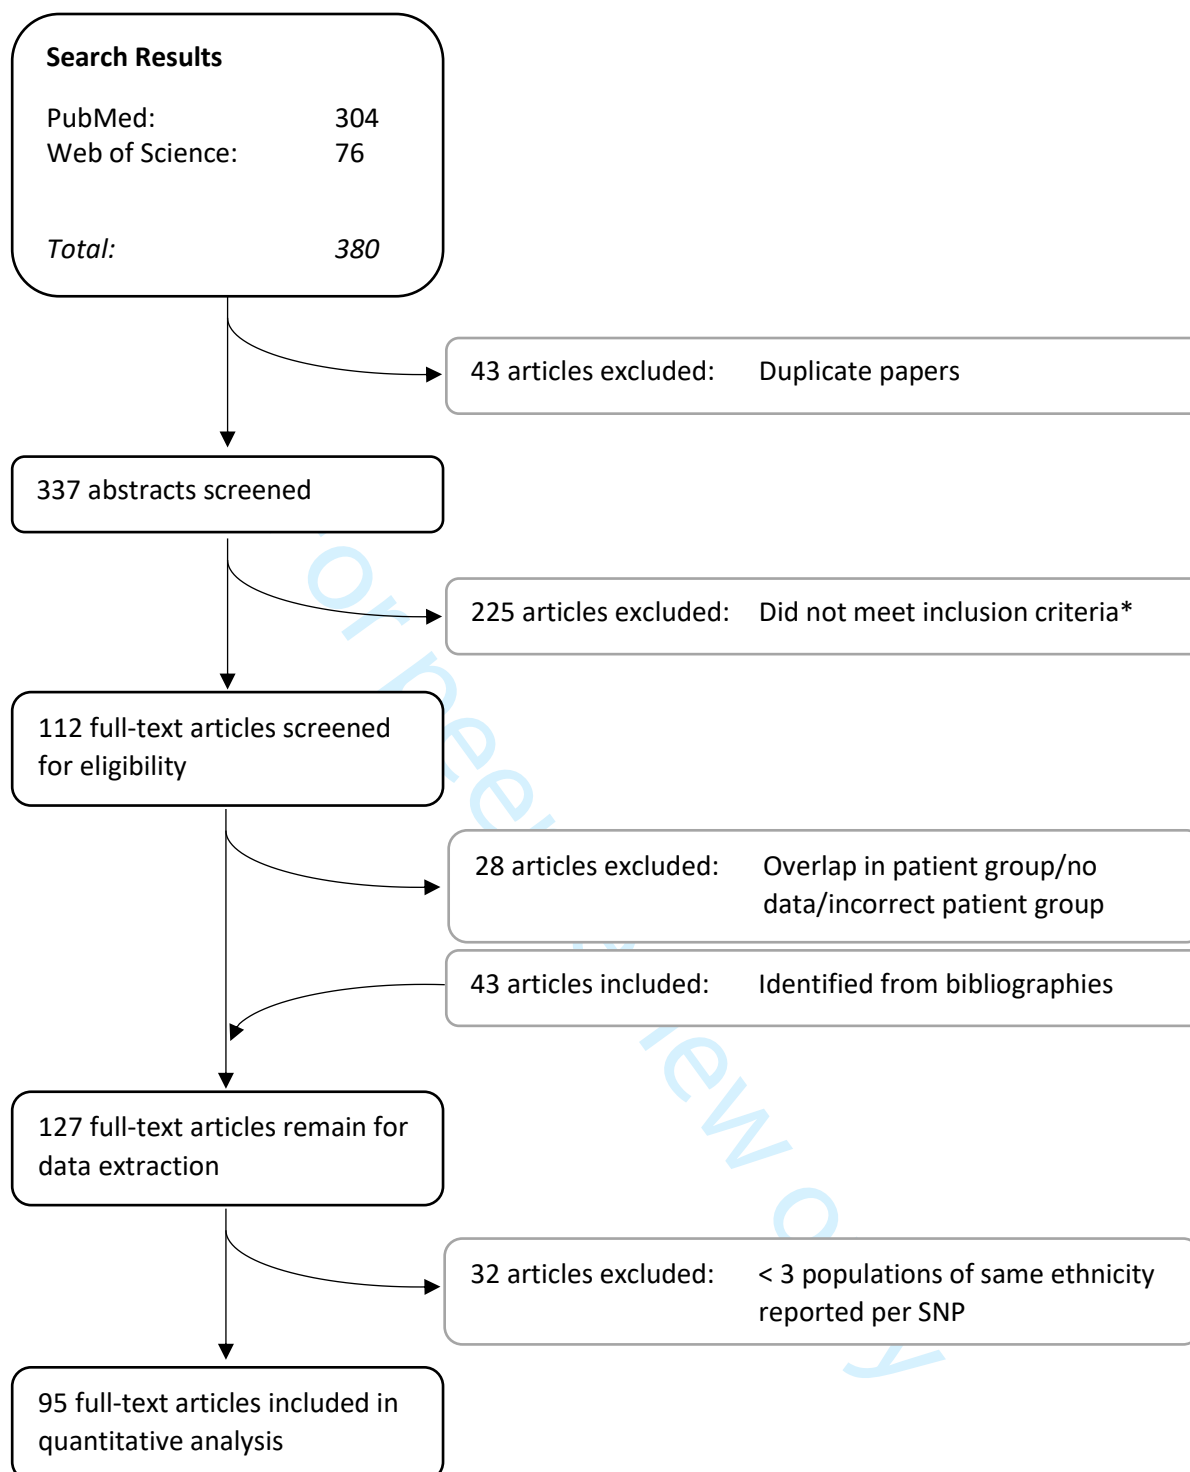

\*Inclusion criteria: Any paper was removed from the analysis if it was not written in English or Spanish (n=20), was a non-human study (n=5), was a paediatric study (n=52), was not a case-control study (n=36), did not have a renal disease phenotype (n=90), did not include data for ACE (n=13) or had a pharmaceutical drug focus (n=9)

**Supplementary Figure S1a: ACE Study Flow Diagram**

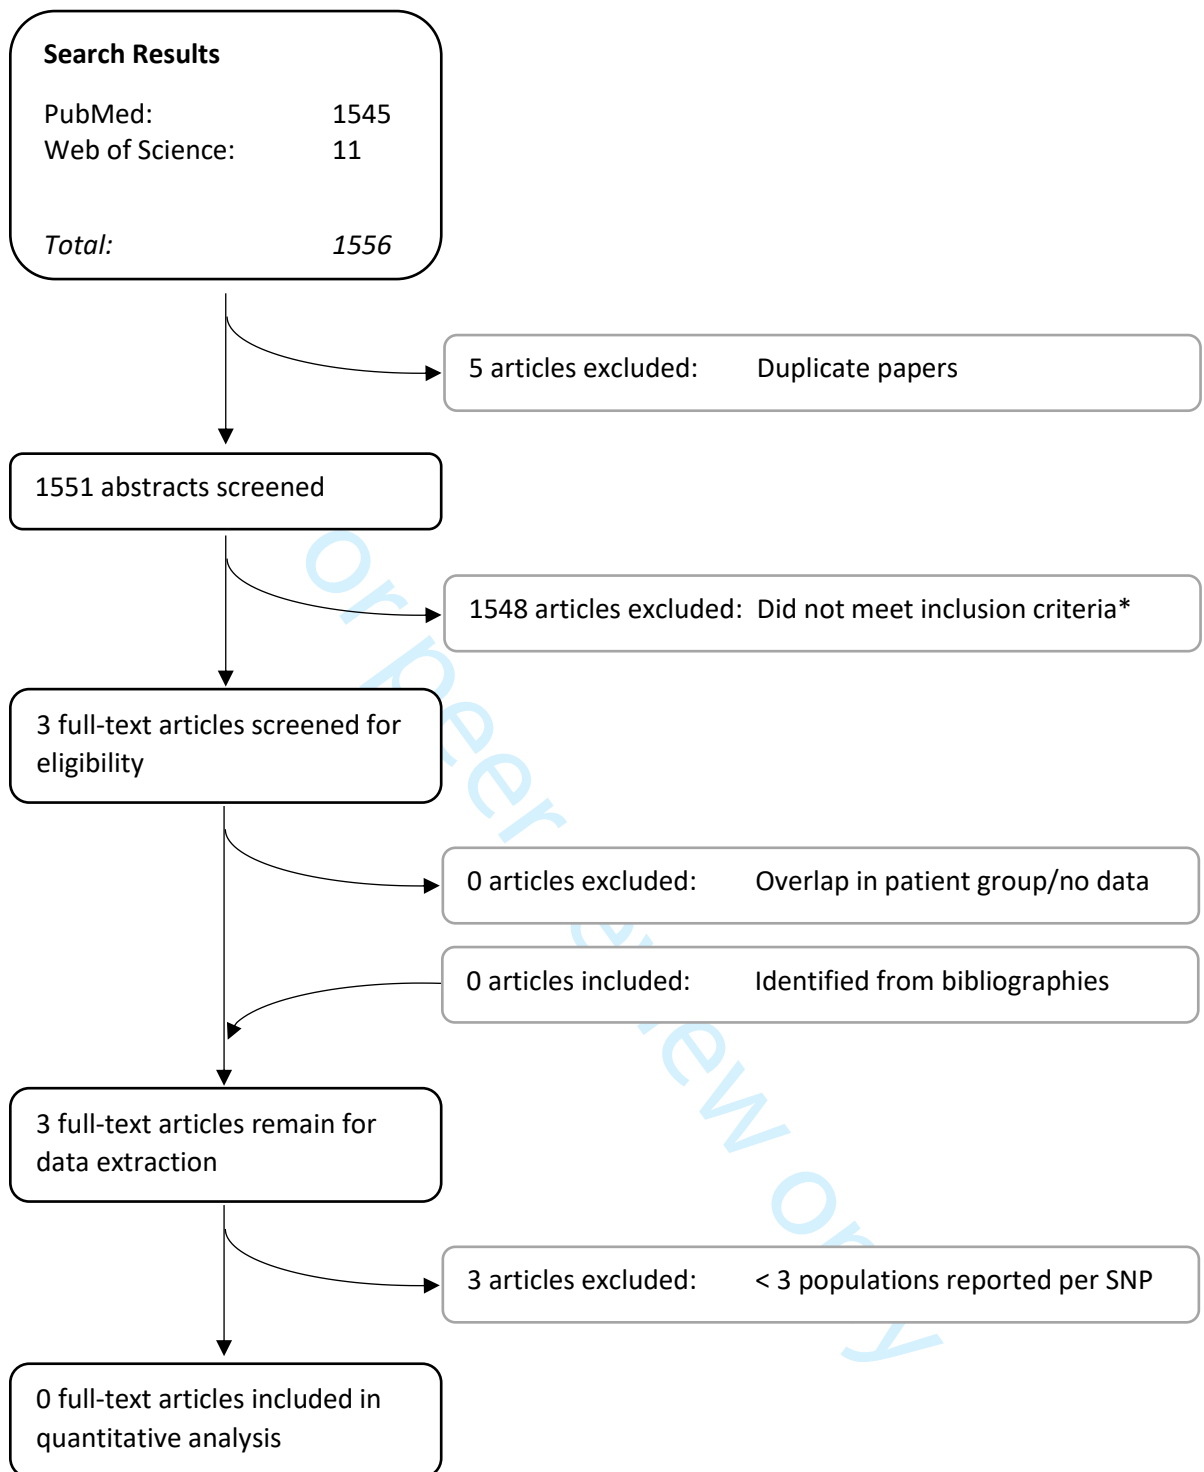

\*Inclusion criteria: Any paper was removed from the analysis if it was not written in English or Spanish (n=55), was a non-human study (n=119), was a paediatric study (n=149), was not a case-control study (n=53), did not have a renal disease phenotype (n=693), did not include data for ACE2 (n=435) or had a pharmaceutical drug focus (n=44)

**Supplementary Figure S1b: ACE2 Study Flow Diagram**

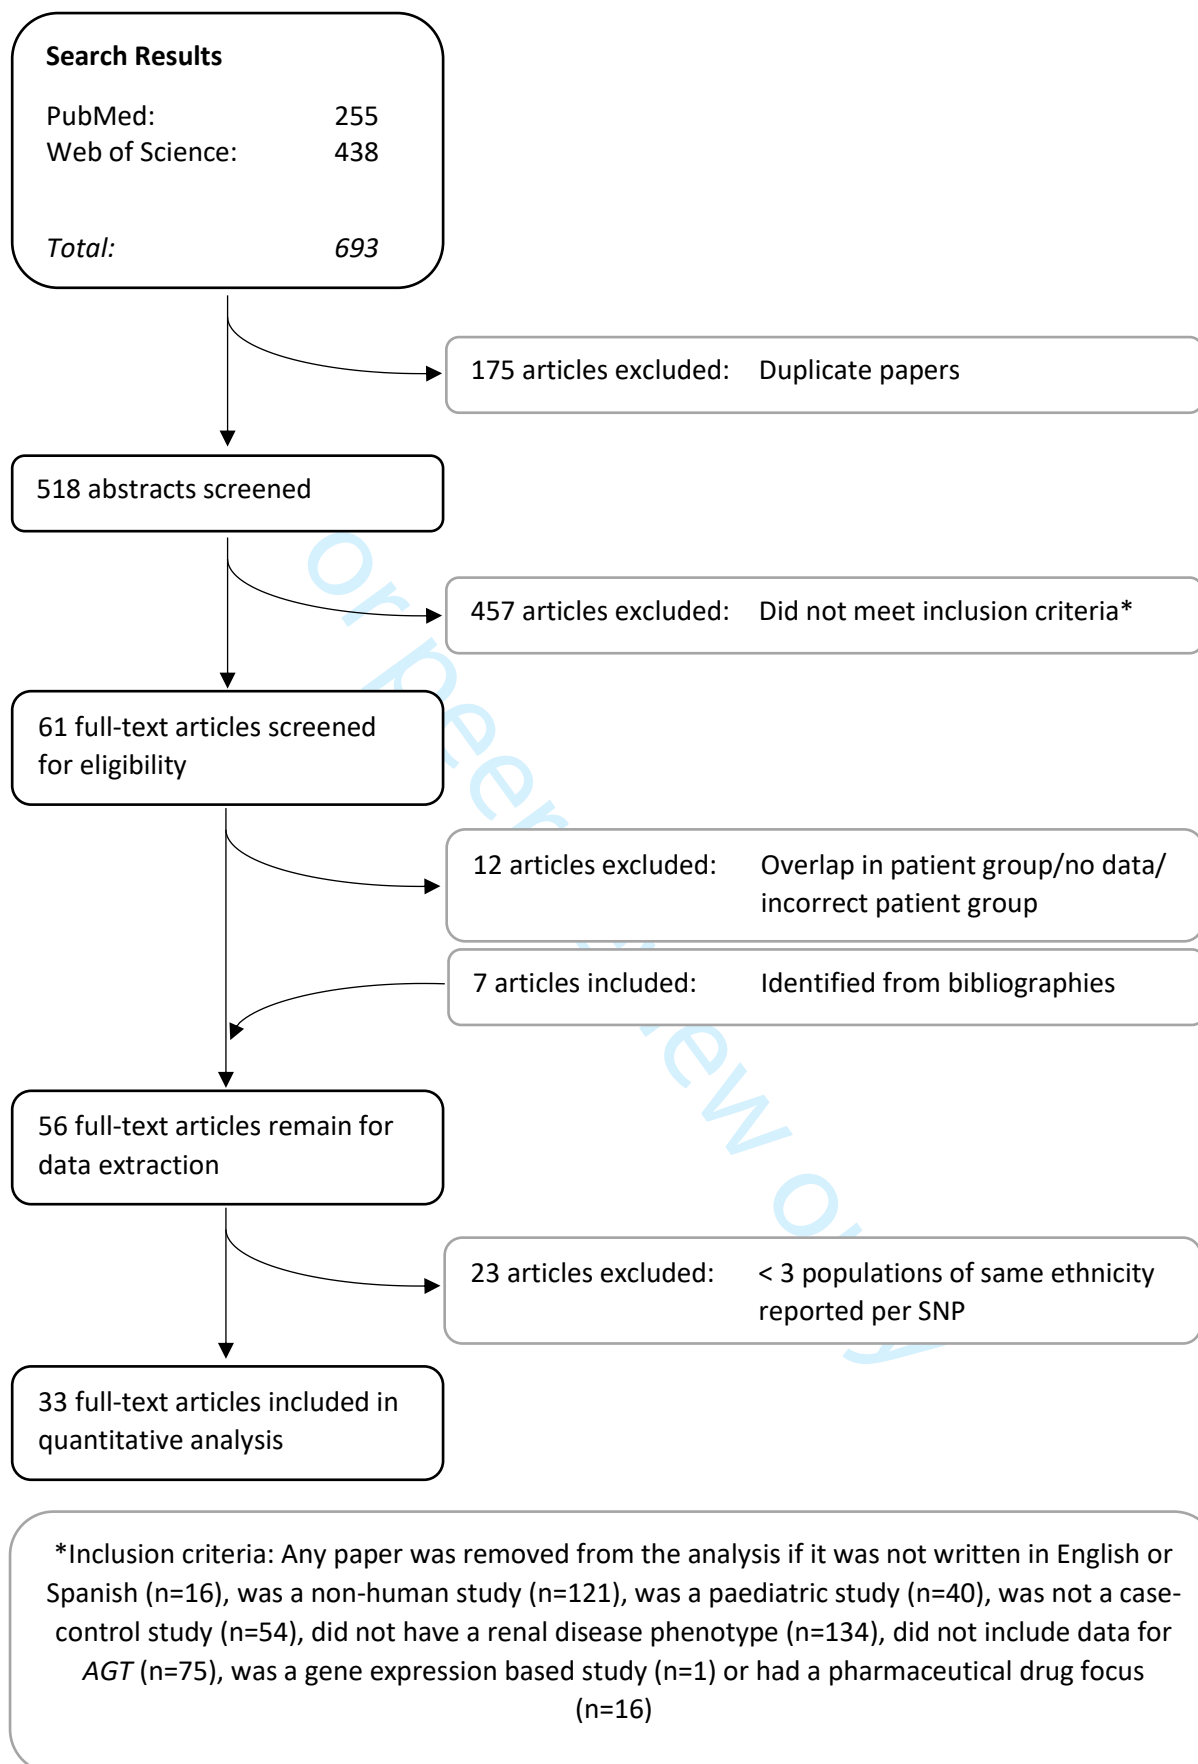

**Supplementary Figure S1c: AGT Study Flow Diagram**

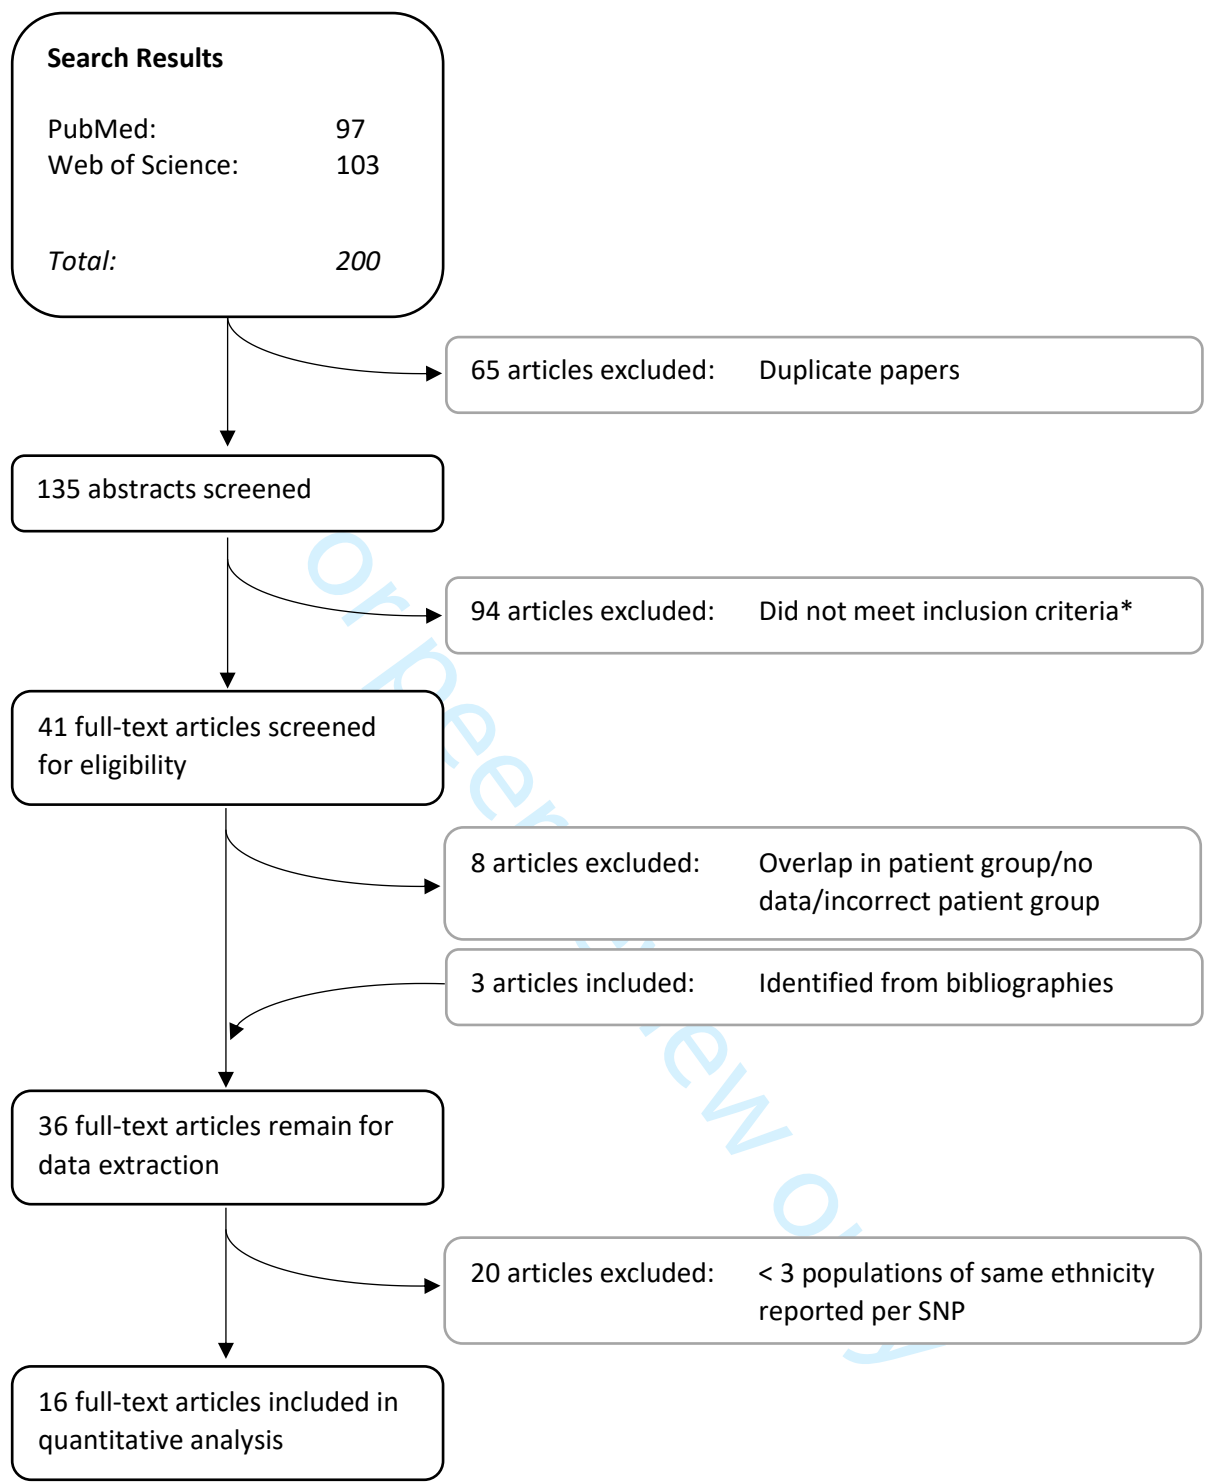

\*Inclusion criteria: Any paper was removed from the analysis if it was not written in English or Spanish (n=8), was a non-human study (n=13), was a paediatric study (n=21), was not a case-control study (n=14), did not have a renal disease phenotype (n=25), did not include data for *AGTR1* (n=3), was a gene expression based study (n=1) or had a pharmaceutical drug focus (n=9)

**Supplementary Figure S1d: AGTR1 Study Flow Diagram**

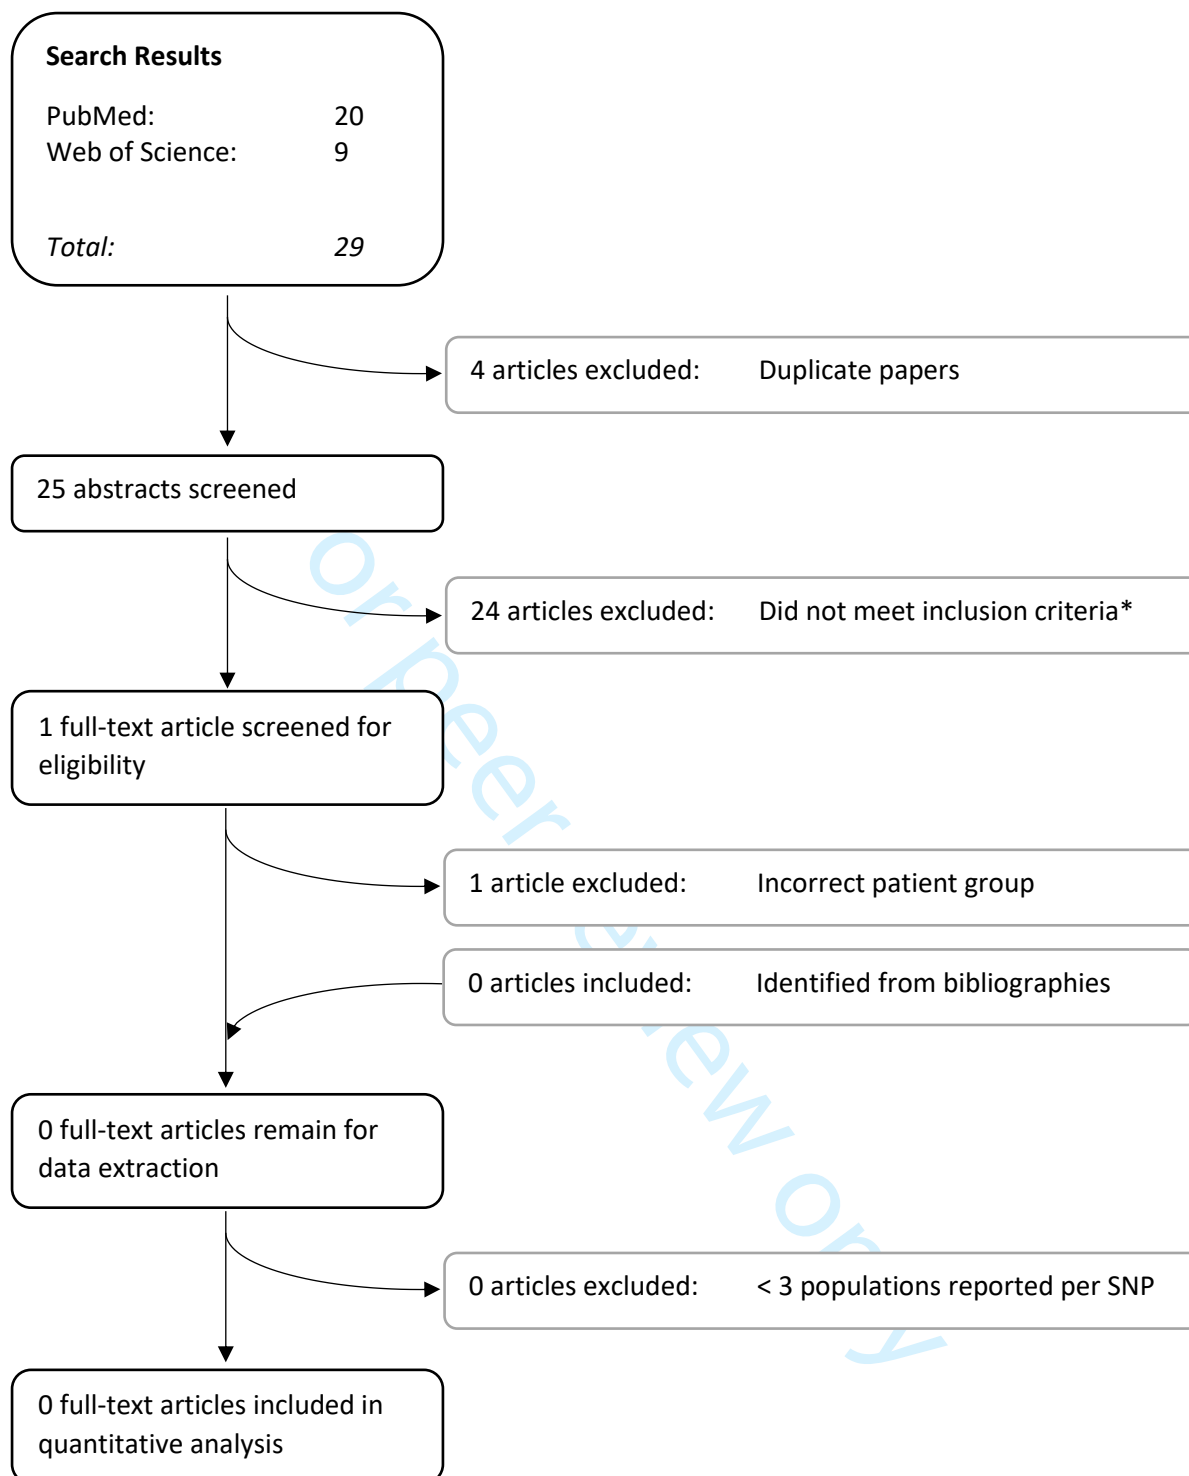

\*Inclusion criteria: Any paper was removed from the analysis if it was not written in English or Spanish (n=1), was a non-human study (n=2), was a paediatric study (n=6), was not a case-control study (n=4), did not have a renal disease phenotype (n=5) or did not include data for *AGTR2* (n=6)

**Supplementary Figure S1e: AGTR2 Study Flow Diagram**

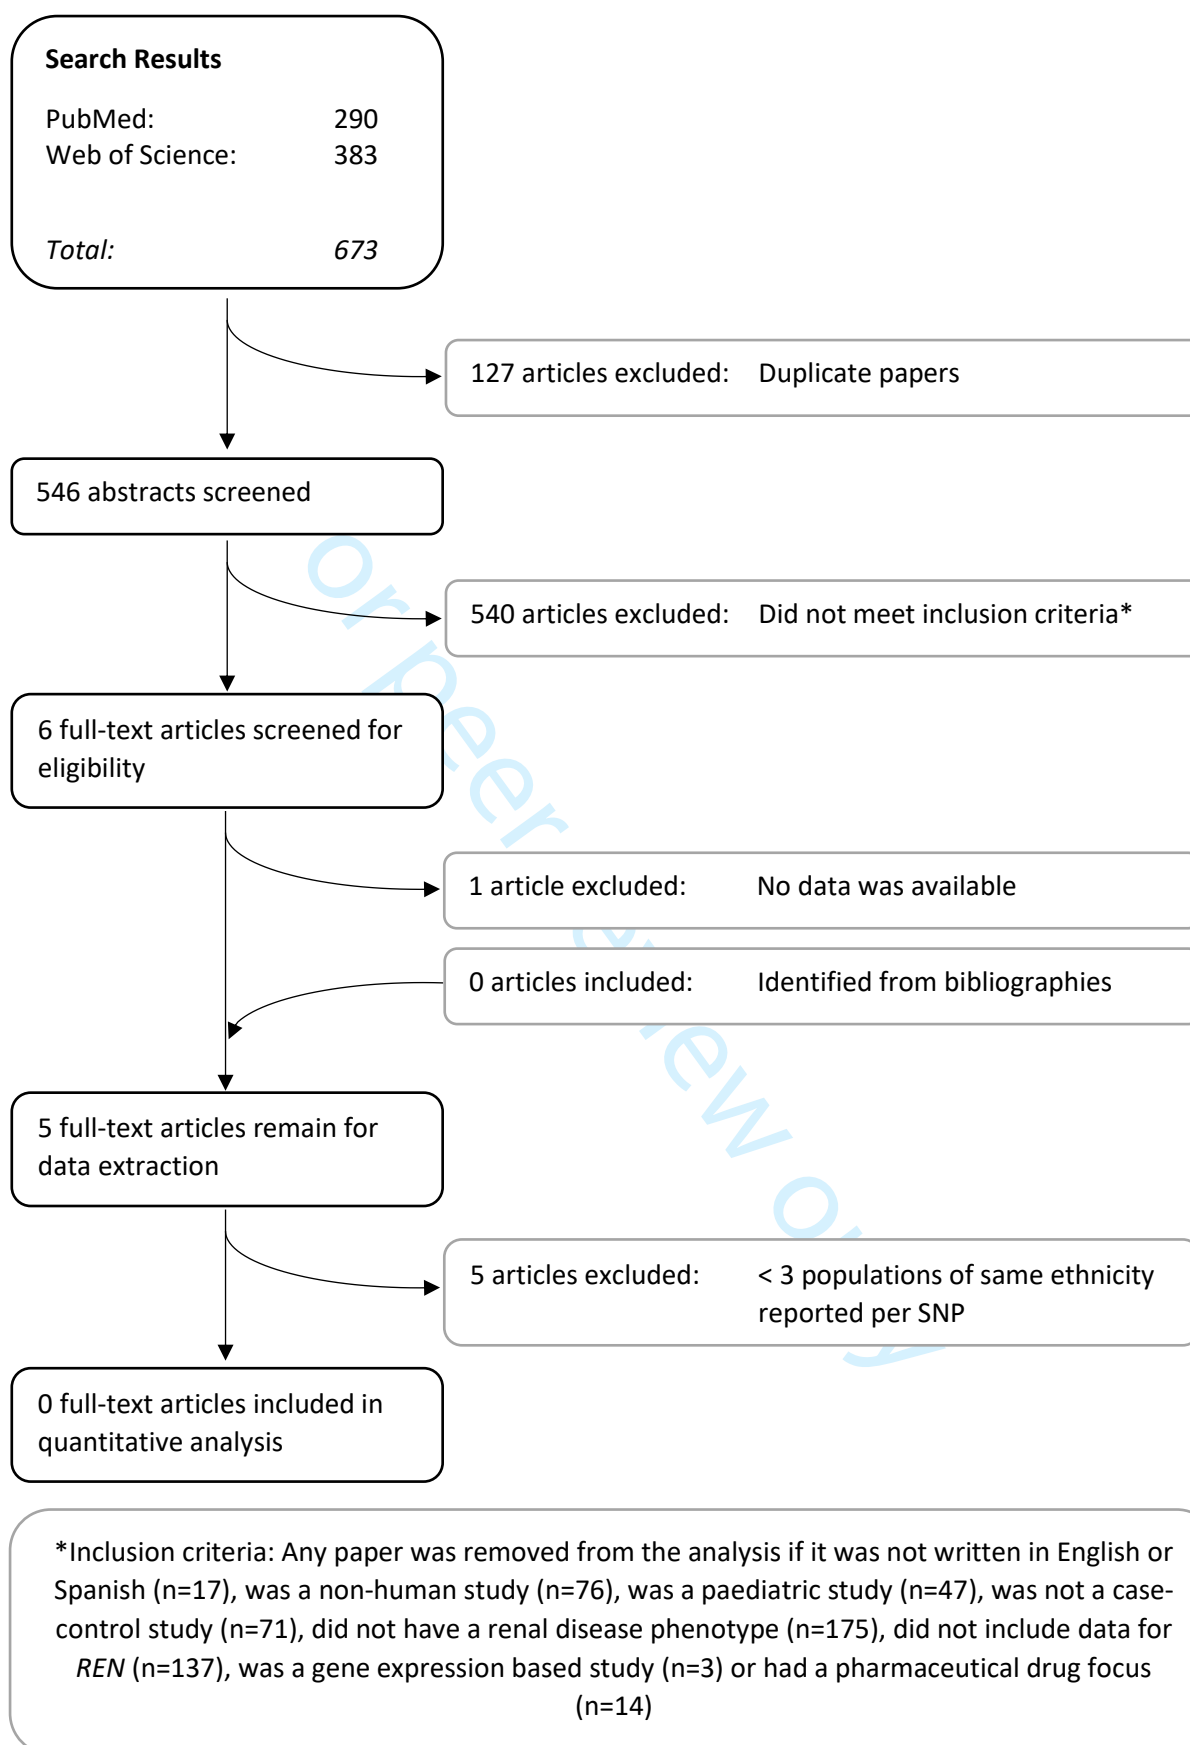

**Supplementary Figure S1f: REN Study Flow Diagram**

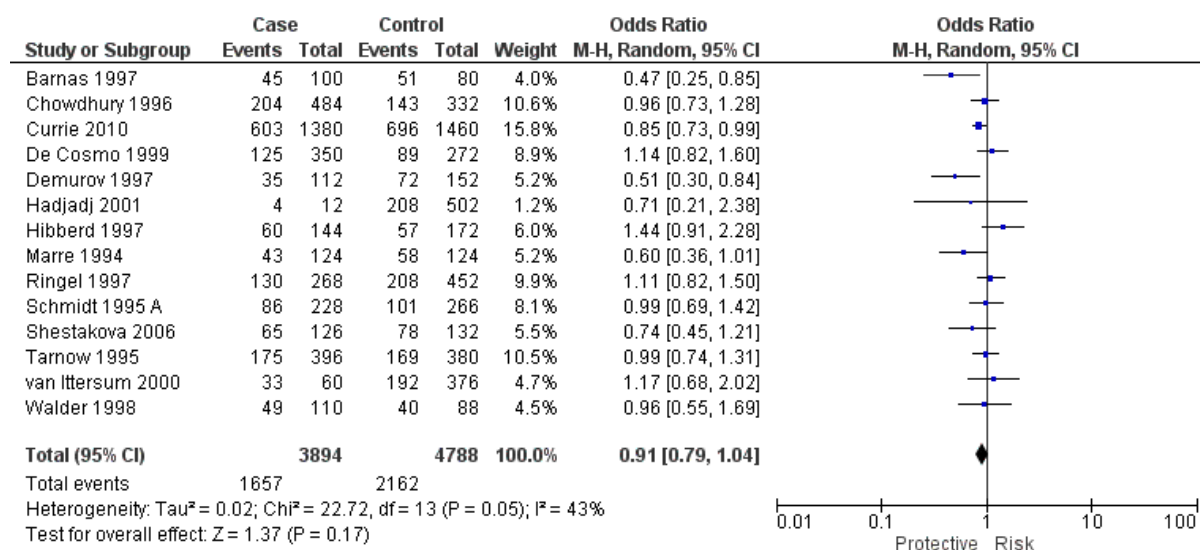

**Supplementary Figure S2a:** Forest plot - ACE I/D investigation, individuals with type 1 diabetic nephropathy compared to individuals with type 1 diabetes mellitus in a European population (ACE insertion compared to deletion).

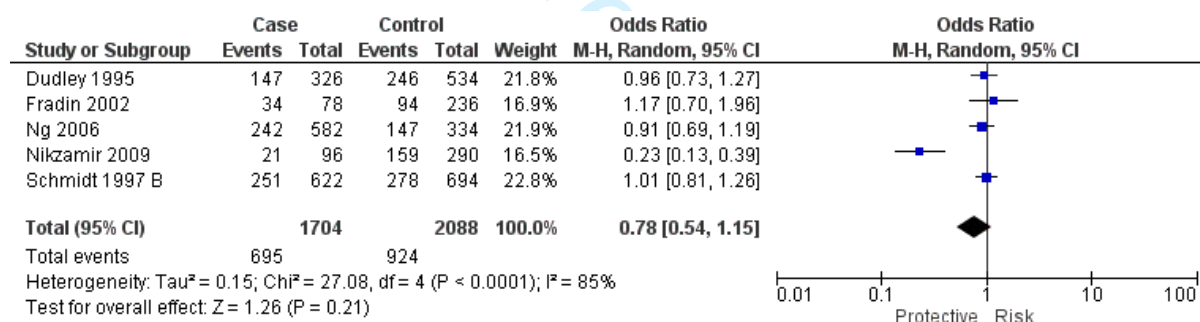

**Supplementary Figure S2b:** Forest plot - ACE I/D investigation, individuals with type 2 diabetic nephropathy compared to individuals with type 2 diabetes mellitus in a European population (ACE insertion compared to deletion).



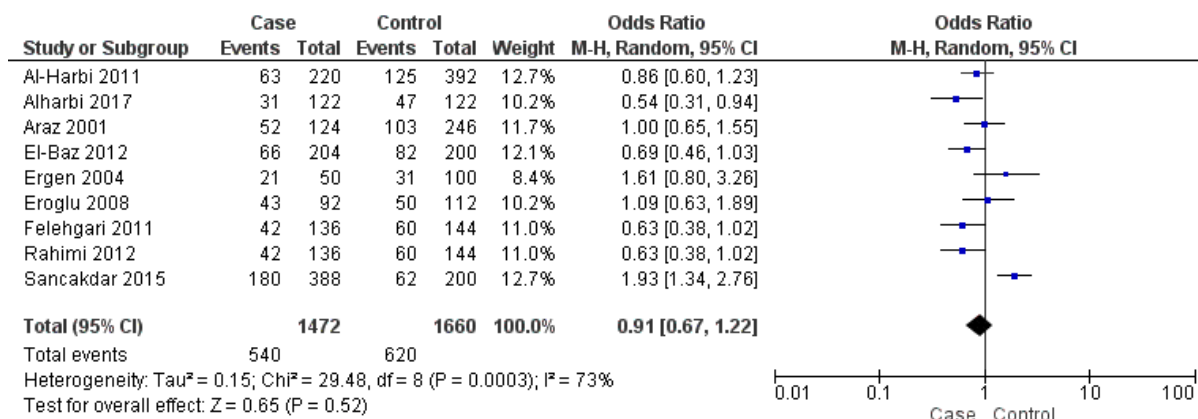

**Supplementary Figure S2c:** Forest plot - ACE I/D investigation, individuals with type 2 diabetic nephropathy compared to individuals with type 2 diabetes mellitus in a Middle Eastern population (ACE insertion compared to deletion).

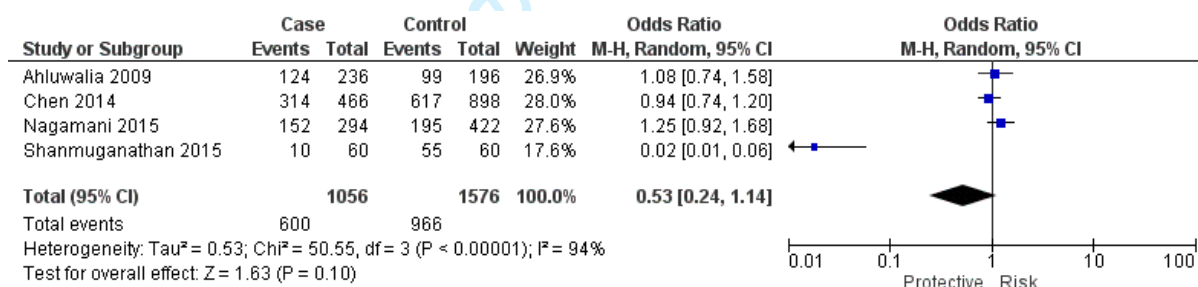

**Supplementary Figure S2d:** Forest plot - ACE I/D investigation, individuals with chronic kidney disease compared to healthy controls in a South Asian population (ACE insertion compared to deletion).

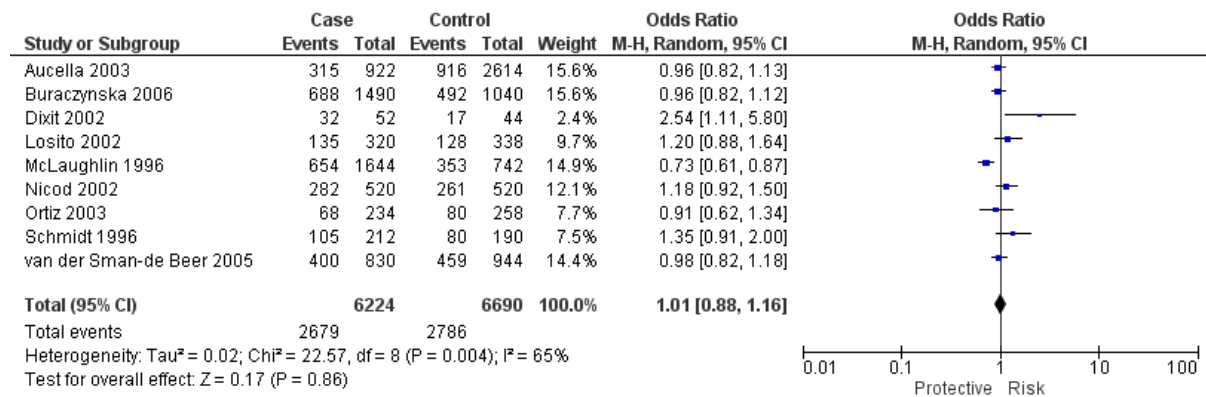

Supplementary Figure S2e: Forest plot - ACE I/D investigation, individuals with end-stage renal disease compared to healthy controls in a European population (ACE insertion compared to deletion).

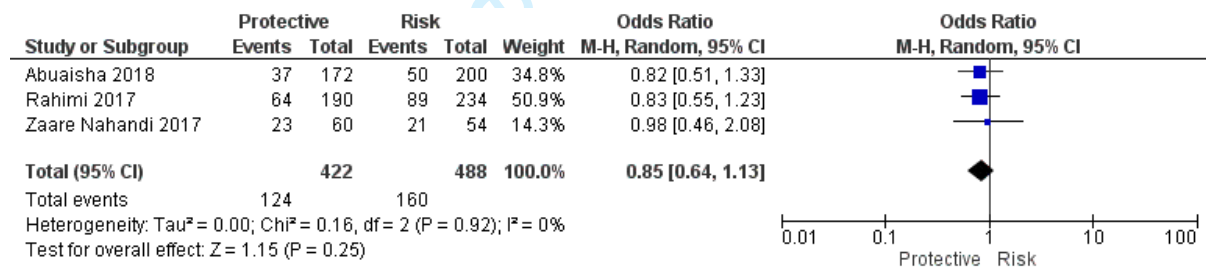

Supplementary Figure S2f: Forest plot - ACE I/D investigation, individuals with end-stage renal disease compared to healthy controls in a Middle Eastern population (ACE insertion compared to deletion).

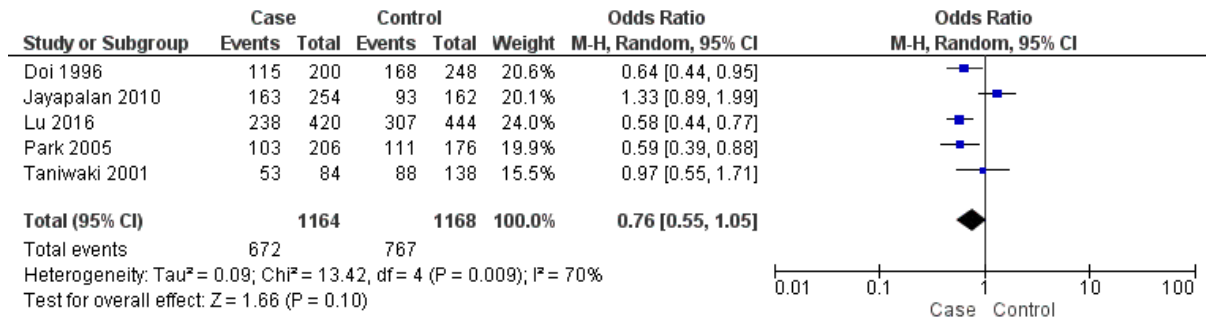

**Supplementary Figure S2g:** Forest plot - ACE I/D investigation, individuals with end-stage renal disease linked to type 2 diabetic nephropathy compared to individuals with type 2 diabetes mellitus in an East Asian population (ACE insertion compared to deletion).

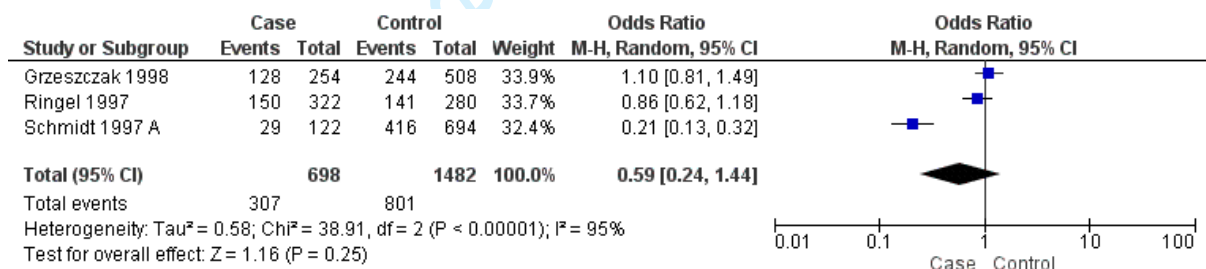

**Supplementary Figure S2h:** Forest plot - ACE I/D investigation, individuals with end-stage renal disease linked to type 2 diabetic nephropathy compared to individuals with type 2 diabetes mellitus in a European population (ACE insertion compared to deletion).

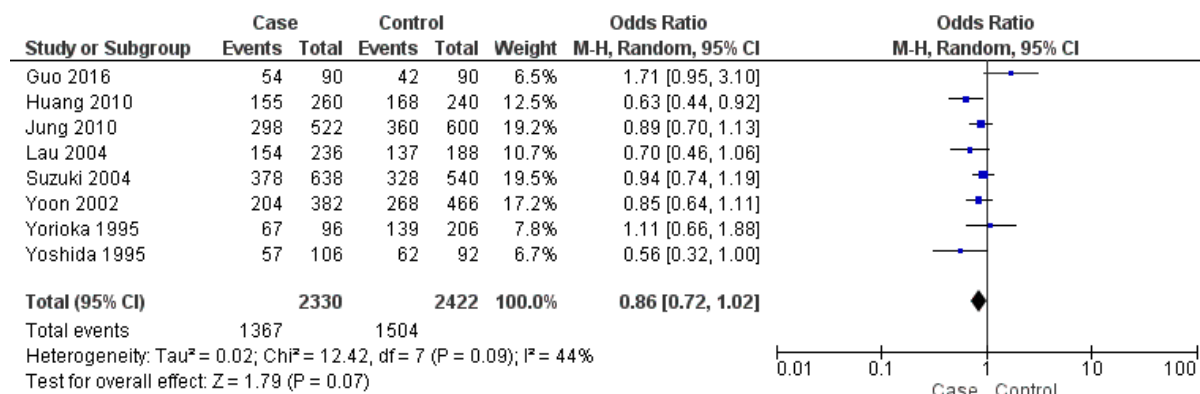

**Supplementary Figure S2i:** Forest plot - *ACE* I/D investigation, individuals with IgA nephropathy compared to healthy controls in an East Asian population (*ACE* insertion compared to deletion).

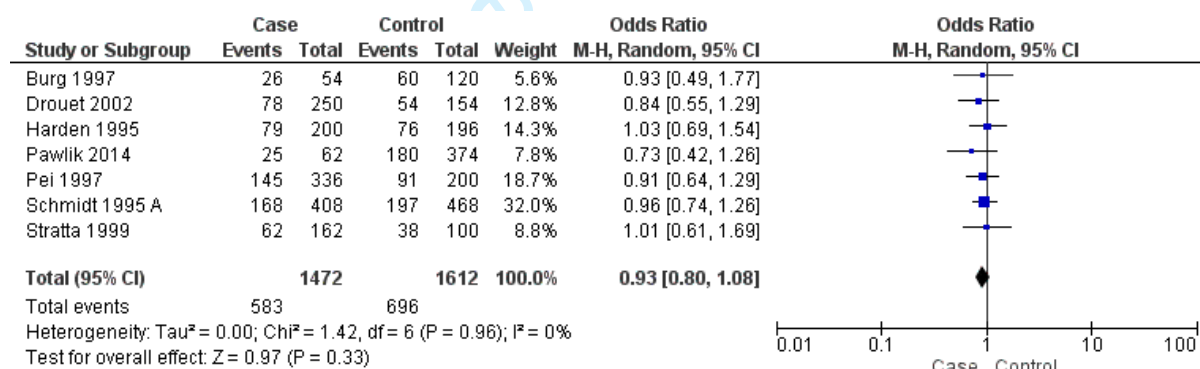

**Supplementary Figure S2j:** Forest plot - *ACE* I/D investigation, individuals with IgA nephropathy compared to healthy controls in a European population (*ACE* insertion compared to deletion).

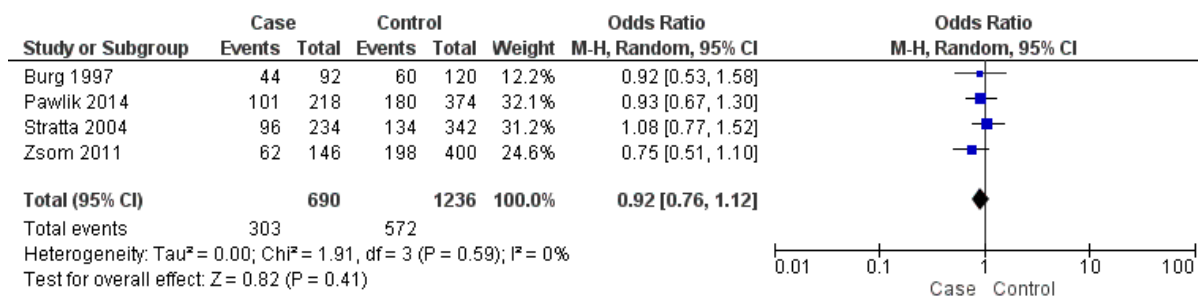

**Supplementary Figure S2k:** Forest plot - ACE I/D investigation, individuals with primary glomerulonephritis compared to healthy controls in a European population (ACE insertion compared to deletion).

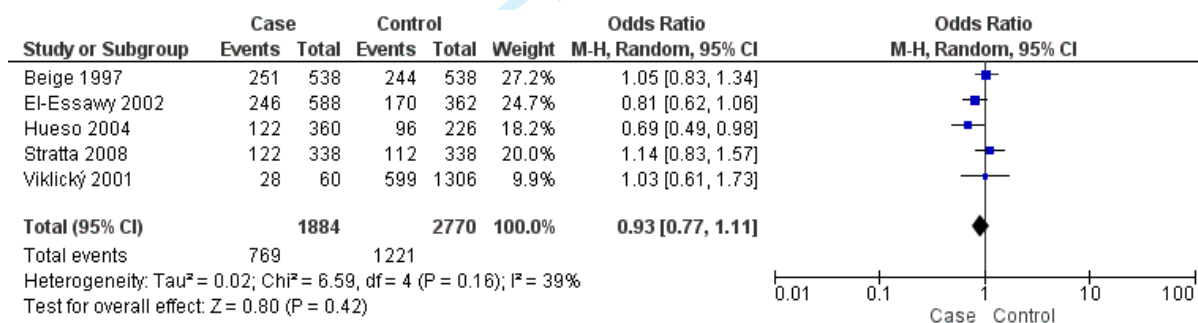

**Supplementary Figure S2l:** Forest plot - ACE I/D investigation, individuals who have had renal transplants compared to healthy controls in a European population (ACE insertion compared to deletion).

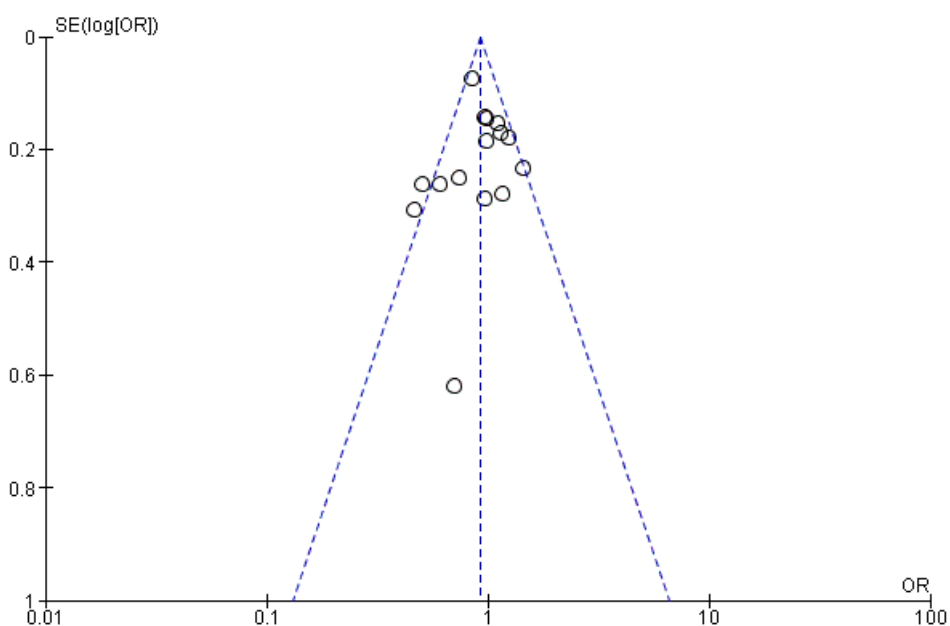

**Supplementary Figure S3a:** Funnel plot - ACE I/D investigation, individuals with type 1 diabetic nephropathy compared to individuals with type 1 diabetes mellitus in a European population (ACE insertion compared to deletion).

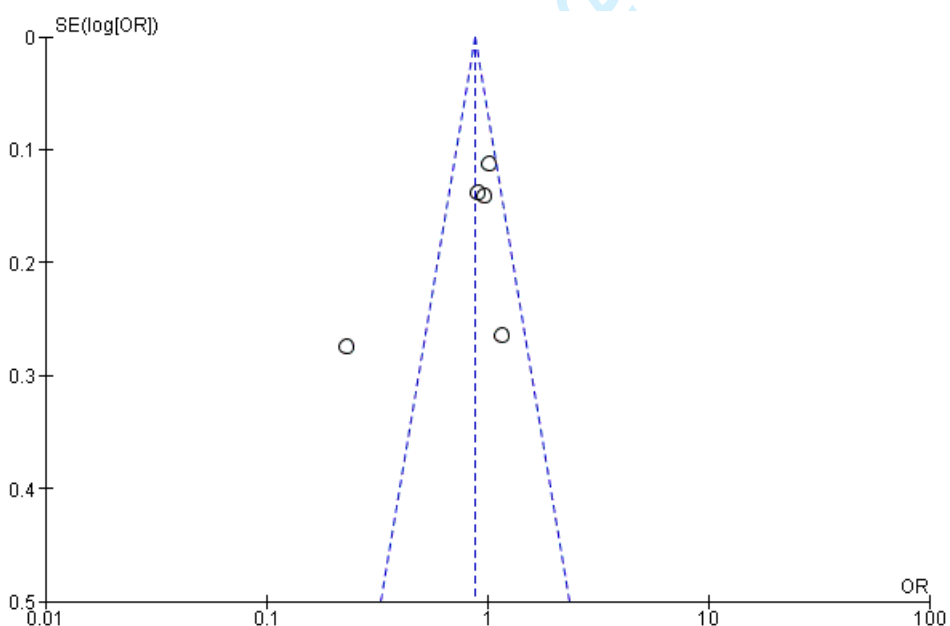

**Supplementary Figure S3b:** Funnel plot - ACE I/D investigation, individuals with type 2 diabetic nephropathy compared to individuals with type 2 diabetes mellitus in a European population (ACE insertion compared to deletion).

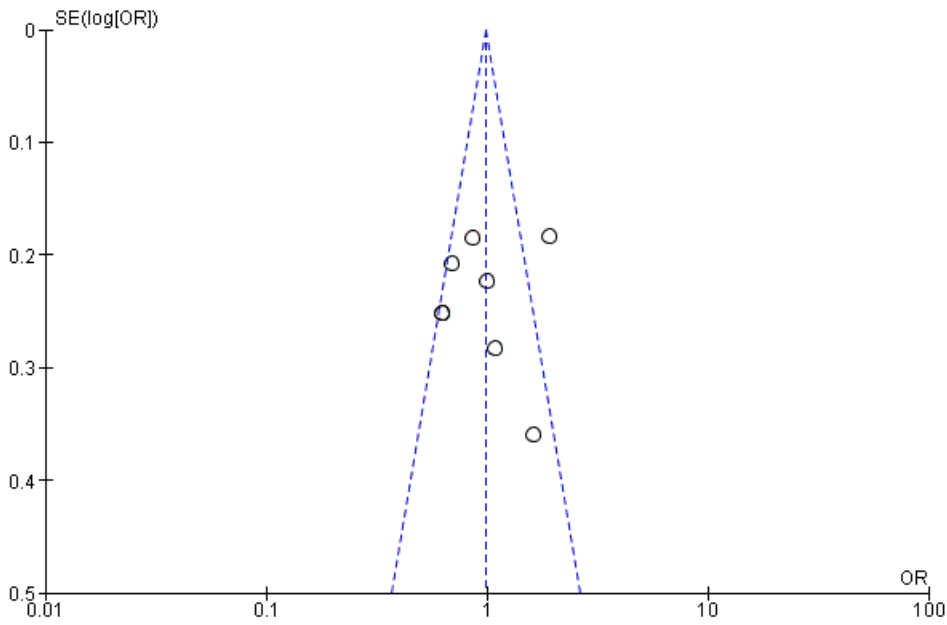

**Supplementary Figure S3c:** Funnel plot - *ACE* I/D investigation, individuals with type 2 diabetic nephropathy compared to individuals with type 2 diabetes mellitus in a Middle Eastern population (*ACE* insertion compared to deletion).

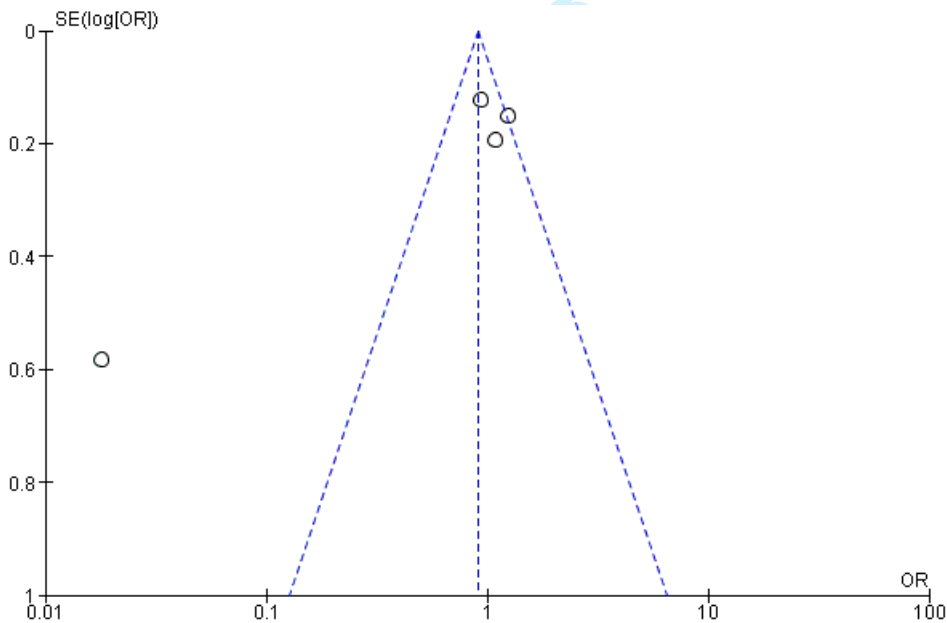

**Supplementary Figure S3d:** Funnel plot - *ACE* I/D investigation, individuals with chronic kidney disease compared to healthy controls in a South Asian population (*ACE* insertion compared to deletion).



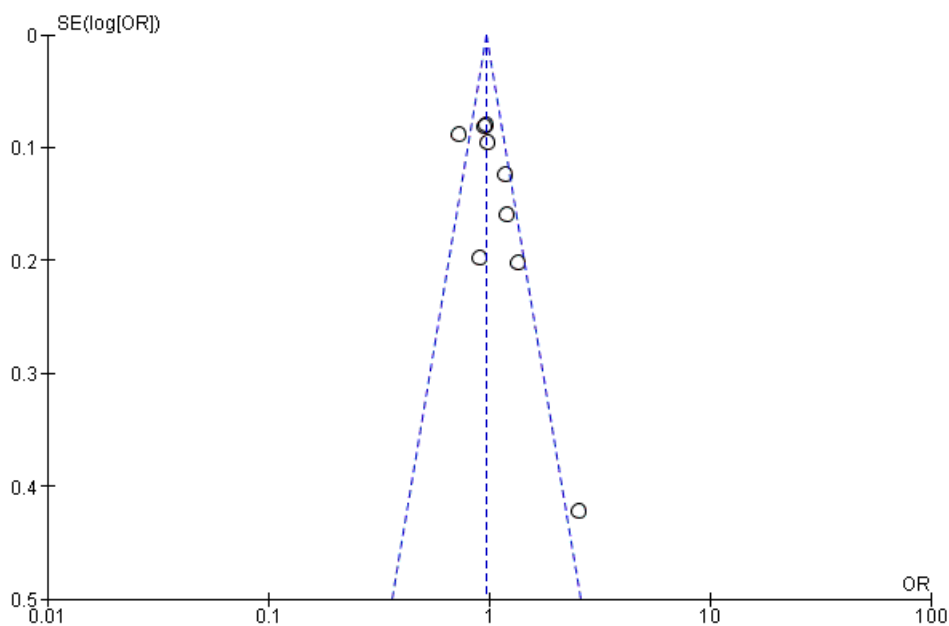

24 **Supplementary Figure S3e:** Funnel plot - *ACE* I/D investigation, individuals with end-stage renal  
 25 disease compared to healthy controls in a European population (*ACE* insertion compared to deletion).  
 26  
 27

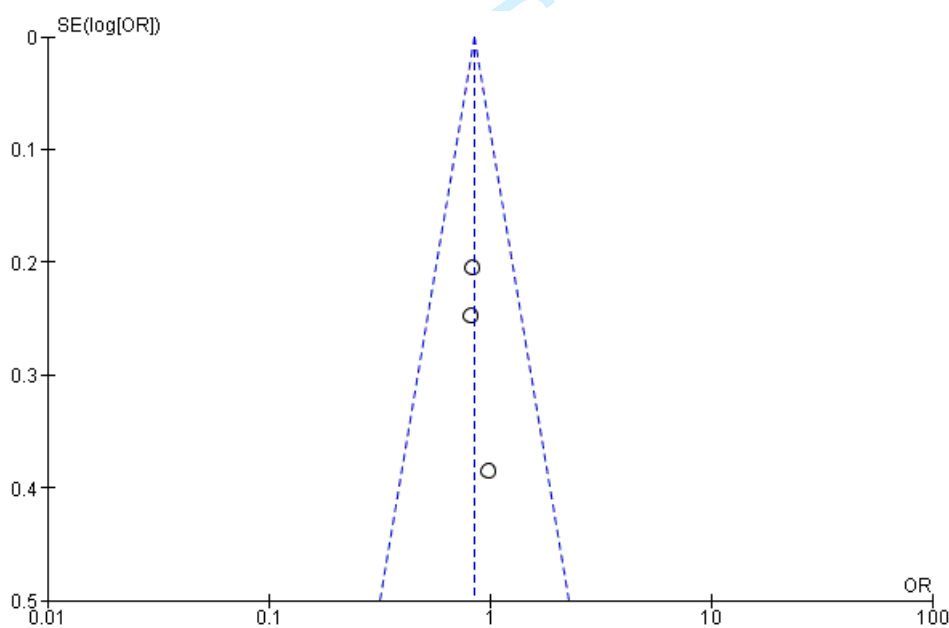

50 **Supplementary Figure S3f:** Funnel plot - *ACE* I/D investigation, individuals with end-stage renal  
 51 disease compared to healthy controls in a Middle Eastern population (*ACE* insertion compared to deletion).  
 52  
 53  
 54  
 55  
 56  
 57  
 58  
 59  
 60

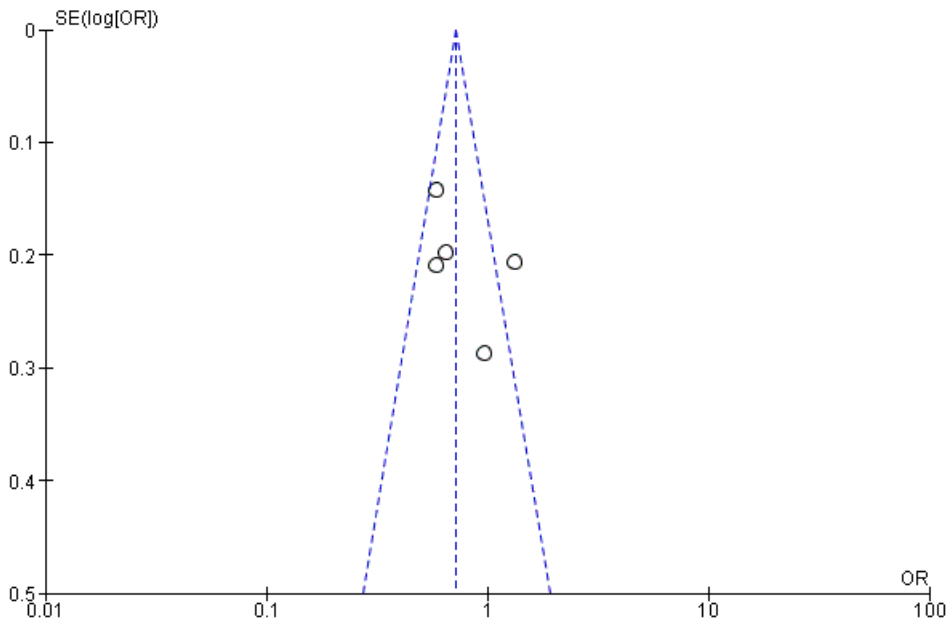

**Supplementary Figure S3g:** Funnel plot - ACE I/D investigation, individuals with end-stage renal disease linked to type 2 diabetic nephropathy compared to individuals with type 2 diabetes mellitus in an East Asian population (ACE insertion compared to deletion).

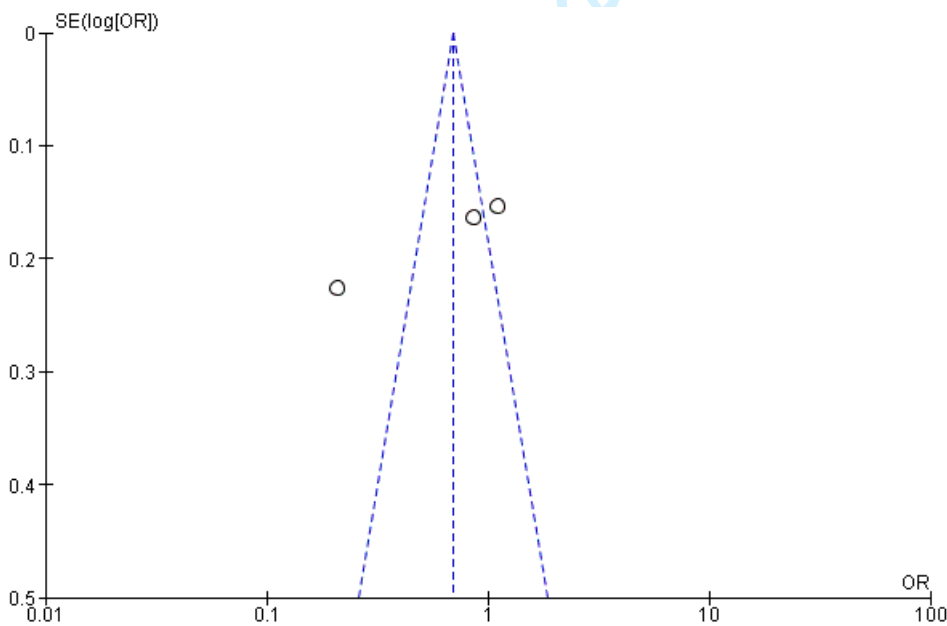

**Supplementary Figure S3h:** Funnel plot - ACE I/D investigation, individuals with end-stage renal disease linked to type 2 diabetic nephropathy compared to individuals with type 2 diabetes mellitus in a European population (ACE insertion compared to deletion).

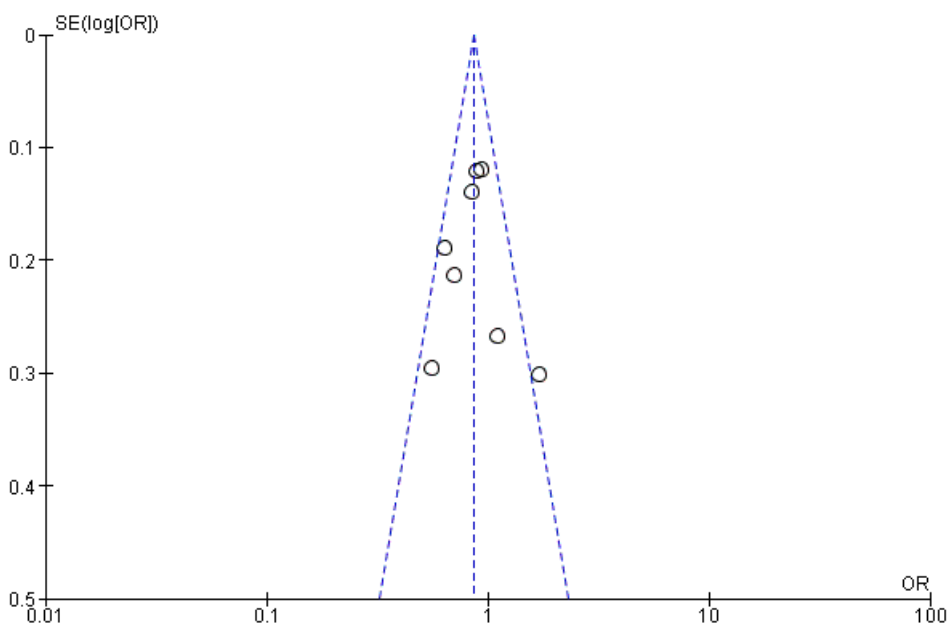

**Supplementary Figure S3i:** Funnel plot - ACE I/D investigation, individuals with IgA nephropathy compared to healthy controls in an East Asian population (ACE insertion compared to deletion).

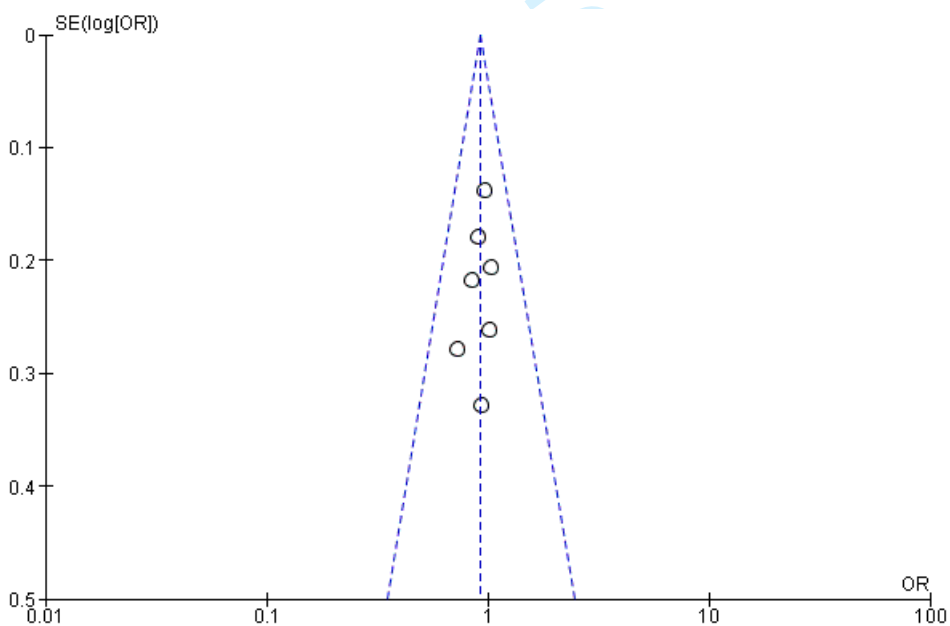

**Supplementary Figure S3j:** Funnel plot - ACE I/D investigation, individuals with IgA nephropathy compared to healthy controls in a European population (ACE insertion compared to deletion).

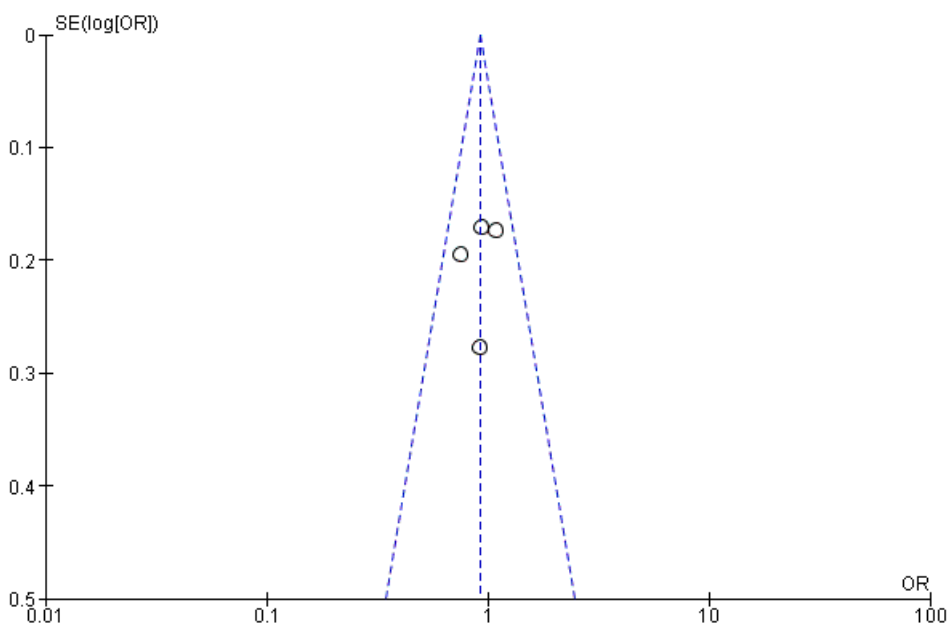

**Supplementary Figure S3k:** Funnel plot - ACE I/D investigation, individuals with primary glomerulonephritis compared to healthy controls in a European population (ACE insertion compared to deletion).

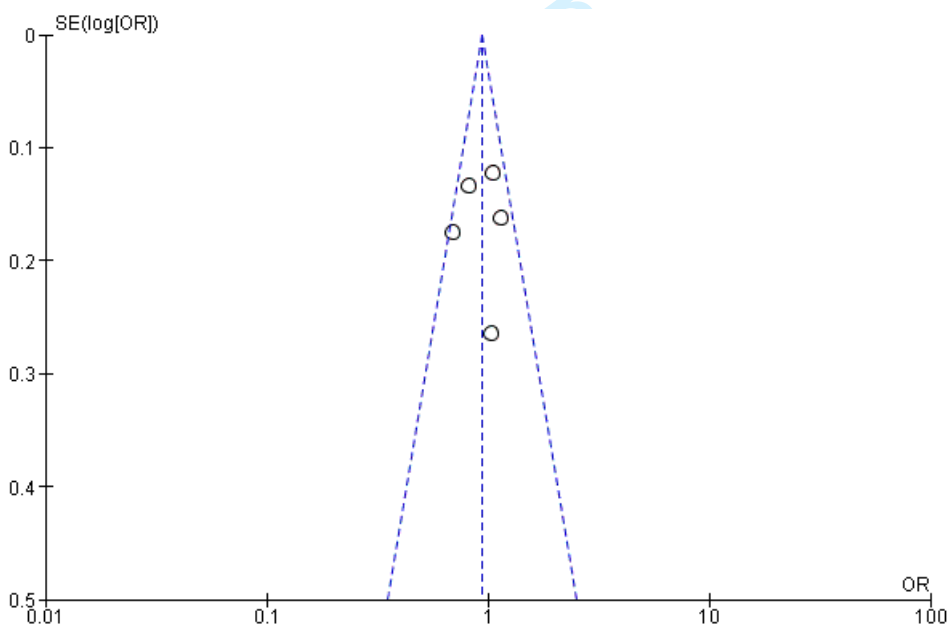

**Supplementary Figure S3l:** Funnel plot - ACE I/D investigation, individuals who have had renal transplants compared to healthy controls in a European population (ACE insertion compared to deletion).

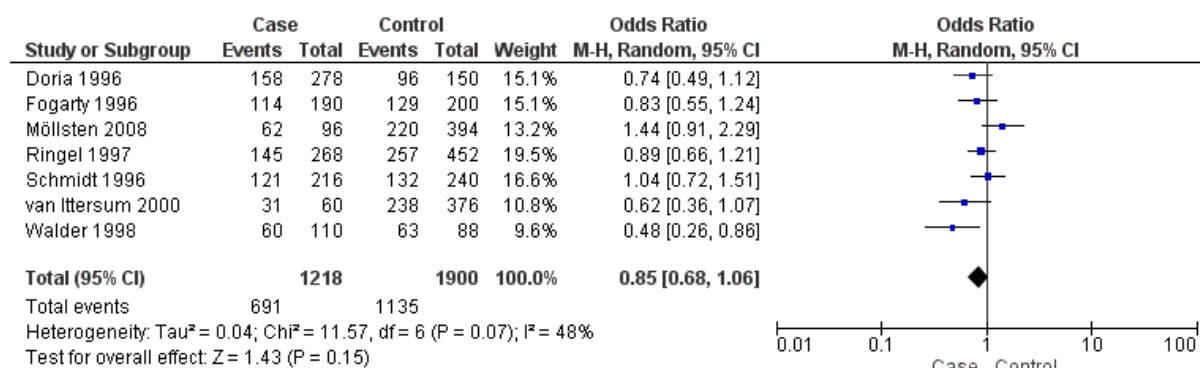

**Supplementary Figure S4a:** Forest plot - *AGT* rs699 investigation, individuals with type 1 diabetic nephropathy compared to individuals with type 1 diabetes mellitus in a European population (*AGT* rs699 T allele compared to C allele).

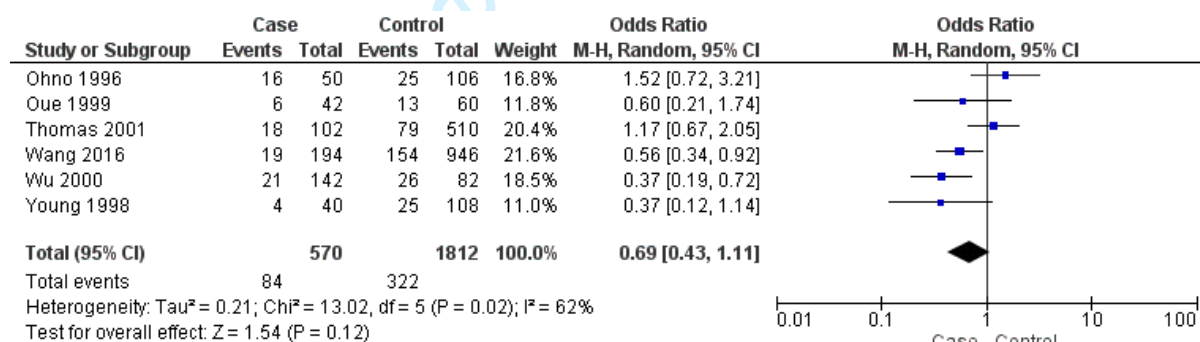

**Supplementary Figure S4b:** Forest plot - *AGT* rs699 investigation, individuals with type 2 diabetic nephropathy compared to individuals with type 2 diabetes mellitus in an East Asian population (*AGT* rs699 T allele compared to C allele).

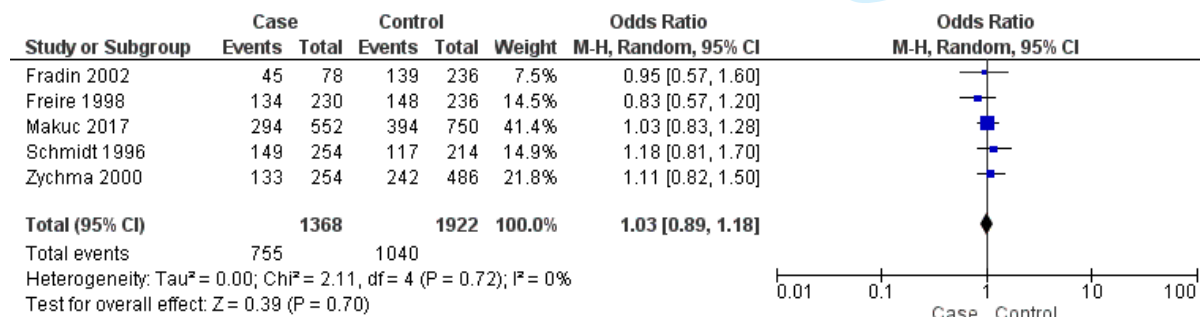

**Supplementary Figure S4c:** Forest plot - *AGT* rs699 investigation, individuals with type 2 diabetic nephropathy compared to individuals with type 2 diabetes mellitus in a European population (*AGT* rs699 T allele compared to C allele).

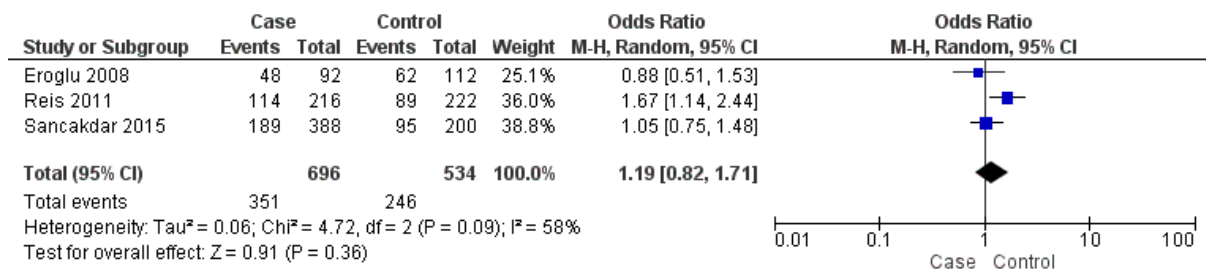

**Supplementary Figure S4d:** Forest plot - AGT rs699 investigation, individuals with type 2 diabetic nephropathy compared to individuals with type 2 diabetes mellitus in a Middle Eastern population (AGT rs699 T allele compared to C allele).

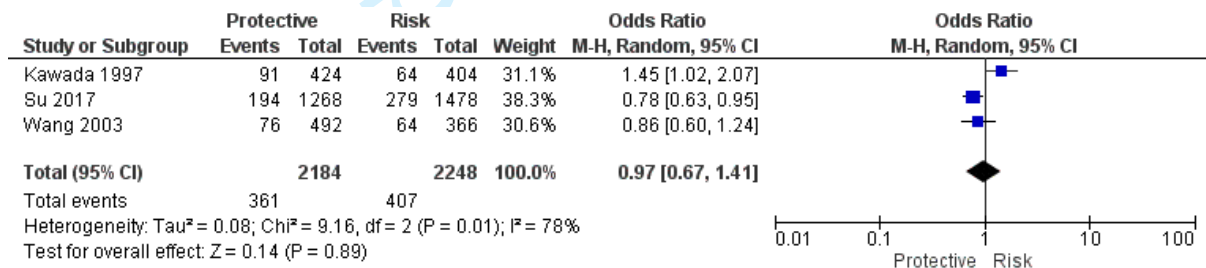

**Supplementary Figure S4e:** Forest plot - AGT rs699 investigation, individuals with end-stage renal disease compared to healthy controls in an East Asian population (AGT rs699 T allele compared to C allele).

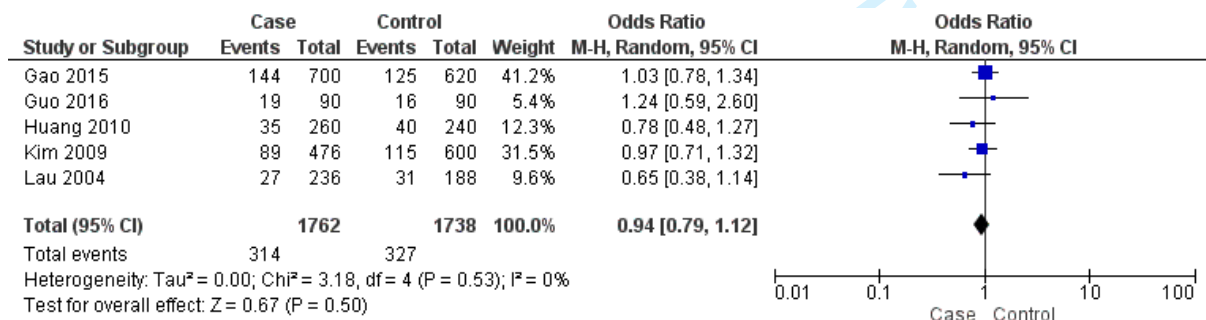

**Supplementary Figure S4f:** Forest plot - AGT rs699 investigation, individuals with IgA nephropathy compared to healthy controls in an East Asian population (AGT rs699 T allele compared to C allele).

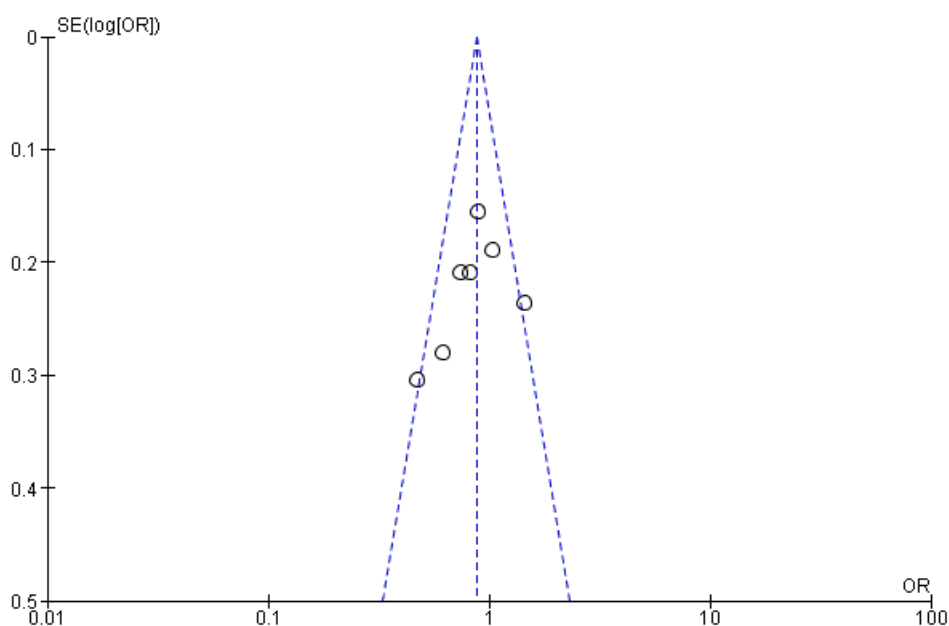

**Supplementary Figure S5a:** Funnel plot - *AGT* rs699 investigation, individuals with type 1 diabetic nephropathy compared to individuals with type 1 diabetes mellitus in a European population (*AGT* rs699 T allele compared to C allele).

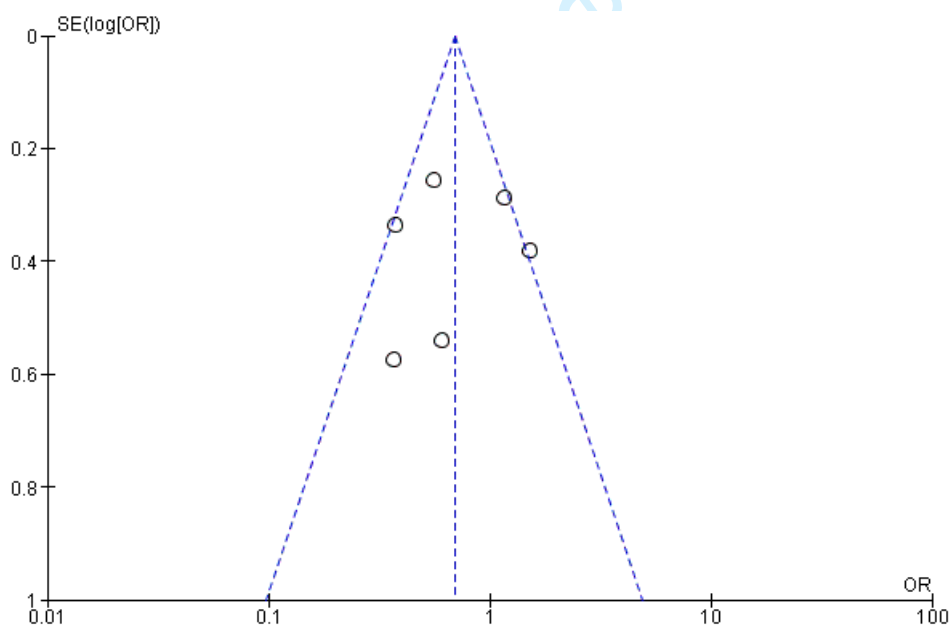

**Supplementary Figure S5b:** Funnel plot - *AGT* rs699 investigation, individuals with type 2 diabetic nephropathy compared to individuals with type 2 diabetes mellitus in an East Asian population (*AGT* rs699 T allele compared to C allele).



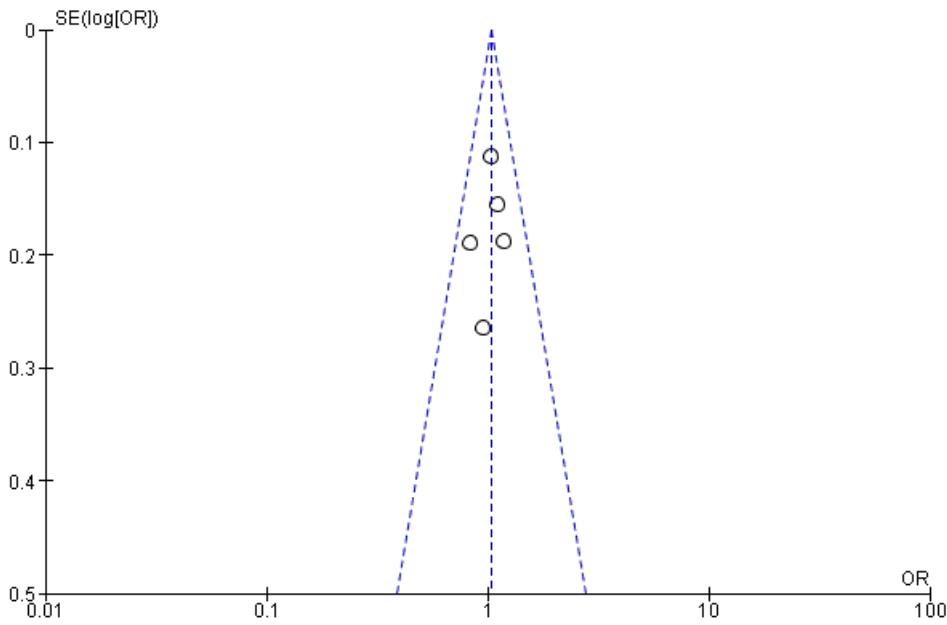

**Supplementary Figure S5c:** Funnel plot - AGT rs699 investigation, individuals with type 2 diabetic nephropathy compared to individuals with type 2 diabetes mellitus in a European population (AGT rs699 T allele compared to C allele).

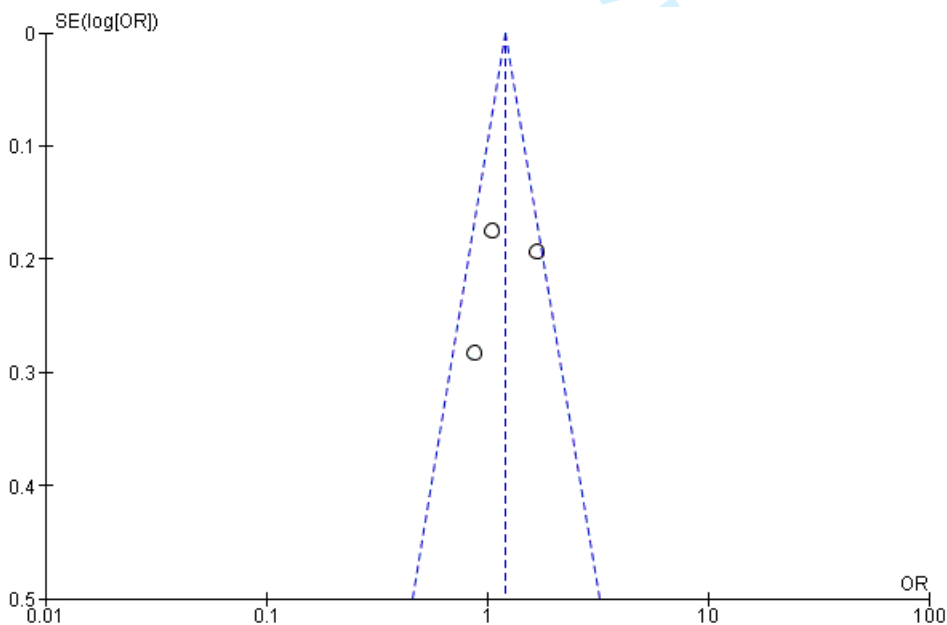

**Supplementary Figure S5d:** Funnel plot - AGT rs699 investigation, individuals with type 2 diabetic nephropathy compared to individuals with type 2 diabetes mellitus in a Middle Eastern population (AGT rs699 T allele compared to C allele).

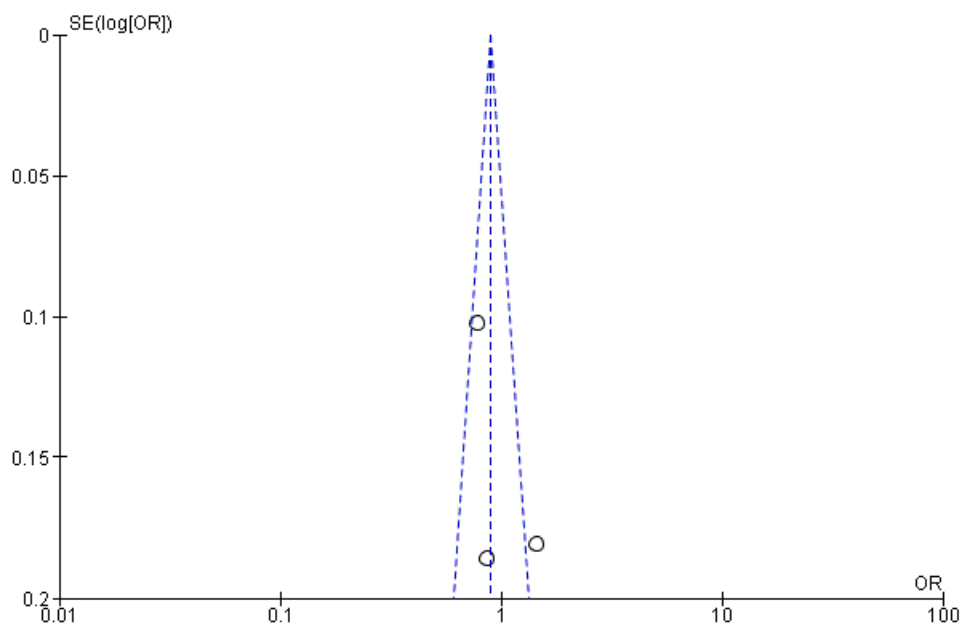

**Supplementary Figure S5e:** Funnel plot - AGT rs699 investigation, individuals with end-stage renal disease compared to healthy controls in an East Asian population (AGT rs699 T allele compared to C allele).

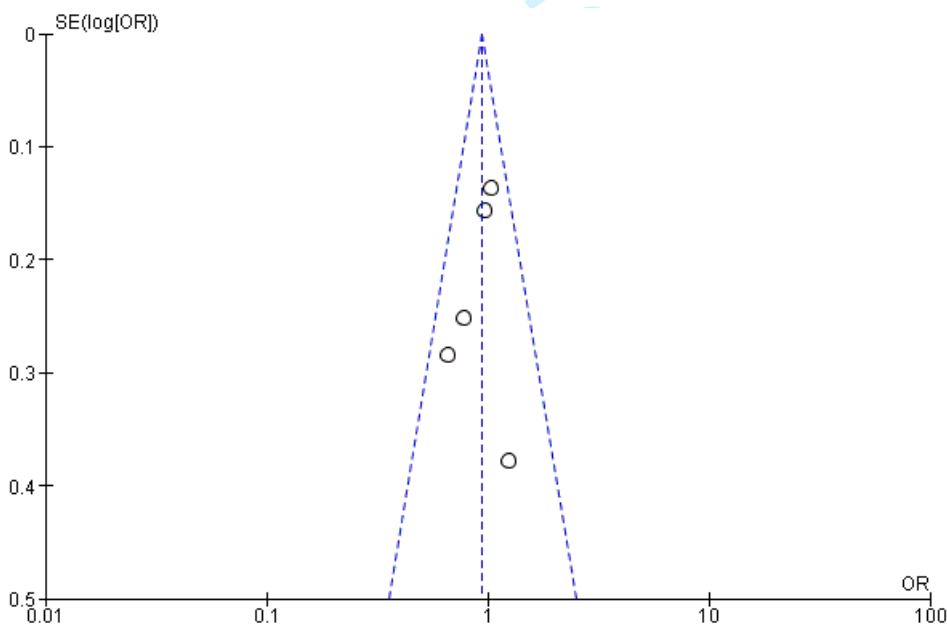

**Supplementary Figure S5f:** Funnel plot - AGT rs699 investigation, individuals with IgA nephropathy compared to healthy controls in an East Asian population (AGT rs699 T allele compared to C allele).

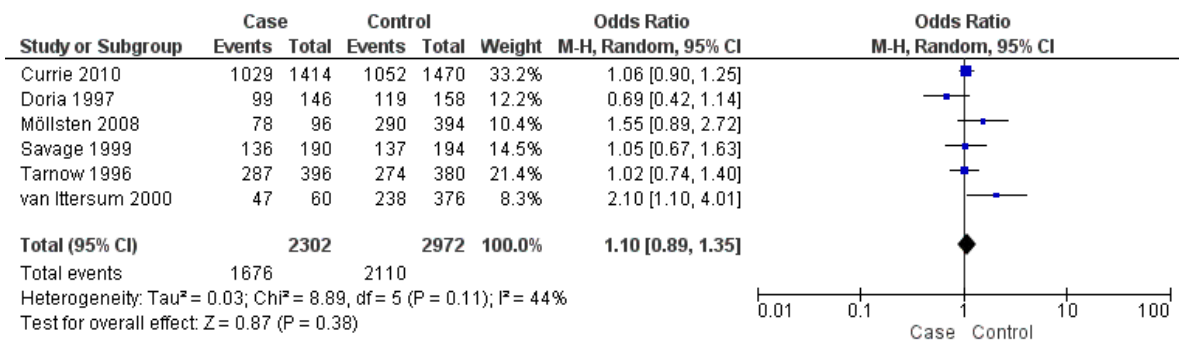

**Supplementary Figure S6a:** Forest plot - *AGTR1* rs5186 investigation, individuals with type 1 diabetic nephropathy compared to individuals with type 1 diabetes mellitus in a European population (*AGTR1* rs5186 A allele compared to C allele).

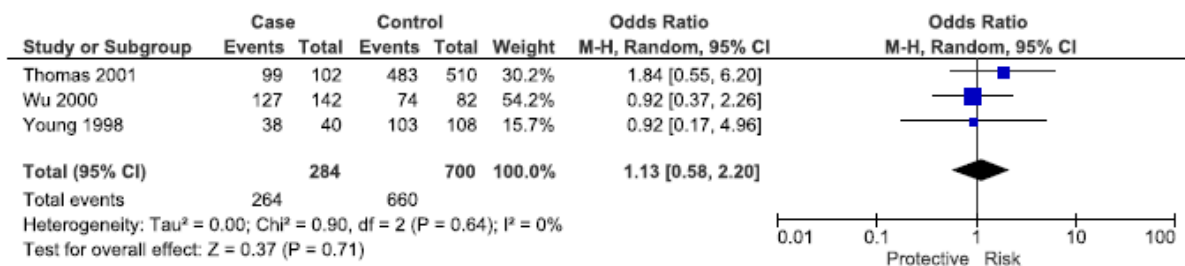

**Supplementary Figure S6b:** Forest plot - *AGTR1* rs5186 investigation, individuals with type 2 diabetic nephropathy compared to individuals with type 2 diabetes mellitus in an East Asian population (*AGTR1* rs5186 A allele compared to C allele).

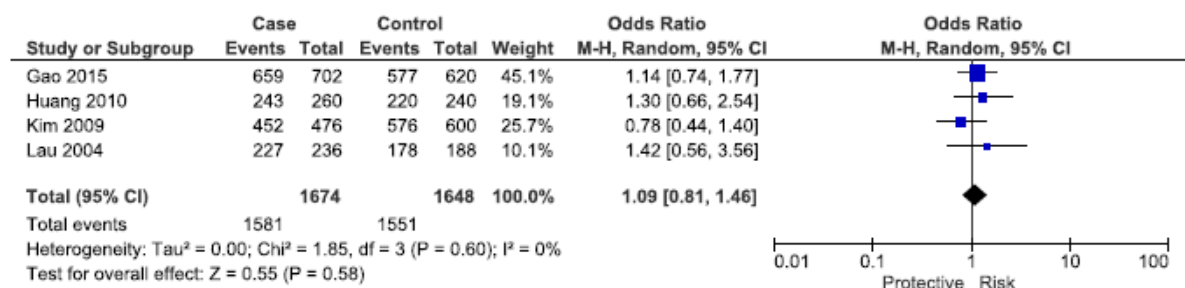

**Supplementary Figure S6c:** Forest plot - *AGTR1* rs5186 investigation, individuals with IgA nephropathy compared to healthy controls in an East Asian population (*AGTR1* rs5186 A allele compared to C allele).

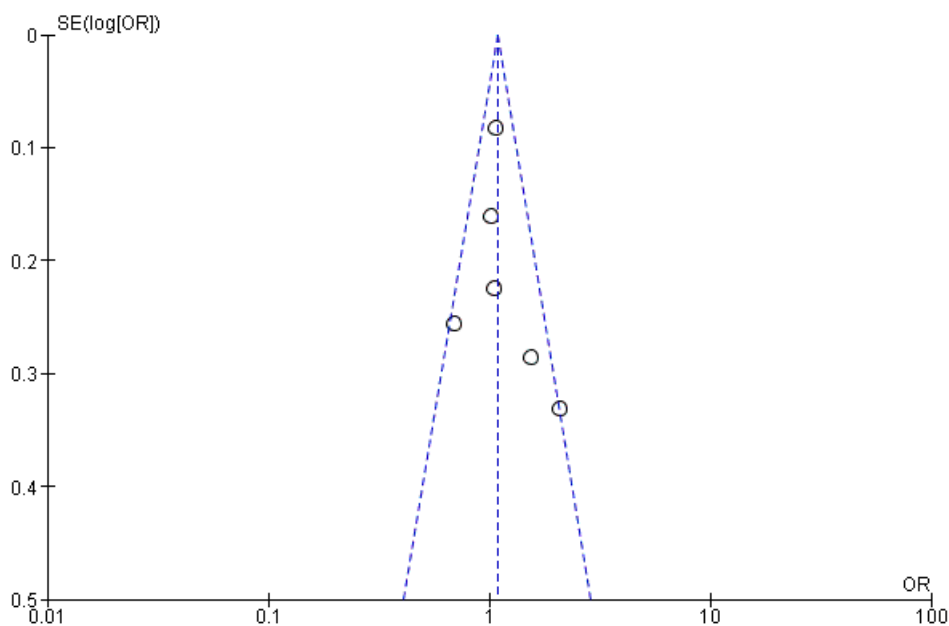

24 **Supplementary Figure S7a:** Funnel plot - *AGTR1* rs5186 investigation, individuals with type 1 diabetic  
 25 nephropathy compared to individuals with type 1 diabetes mellitus in a European population (*AGTR1*  
 26 rs5186 A allele compared to C allele).  
 27  
 28  
 29  
 30  
 31  
 32

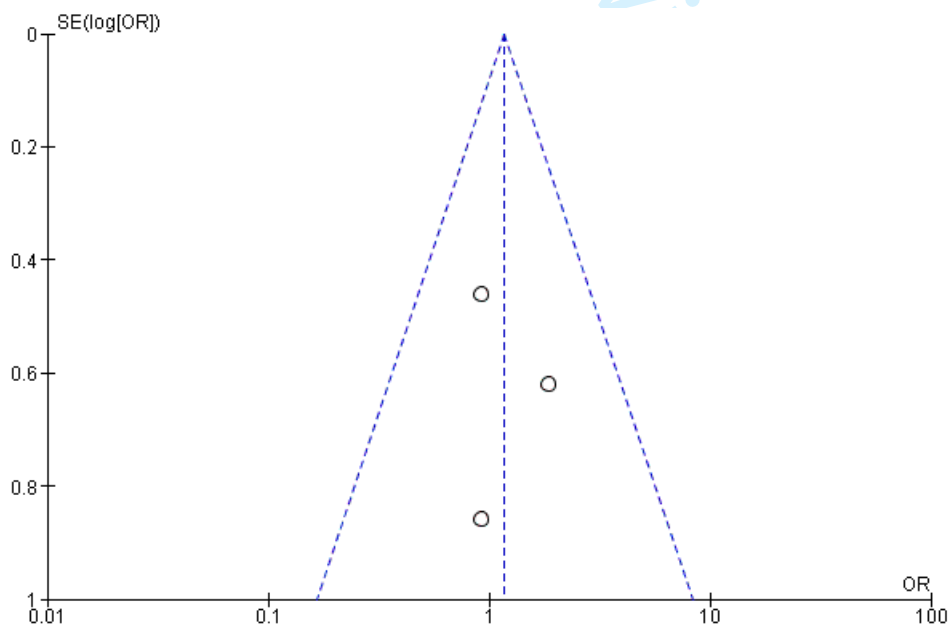

57 **Supplementary Figure S7b:** Funnel plot - *AGTR1* rs5186 investigation, individuals with type 2 diabetic  
 58 nephropathy compared to individuals with type 2 diabetes mellitus in an East Asian population (*AGTR1*  
 59 rs5186 A allele compared to C allele).  
 60

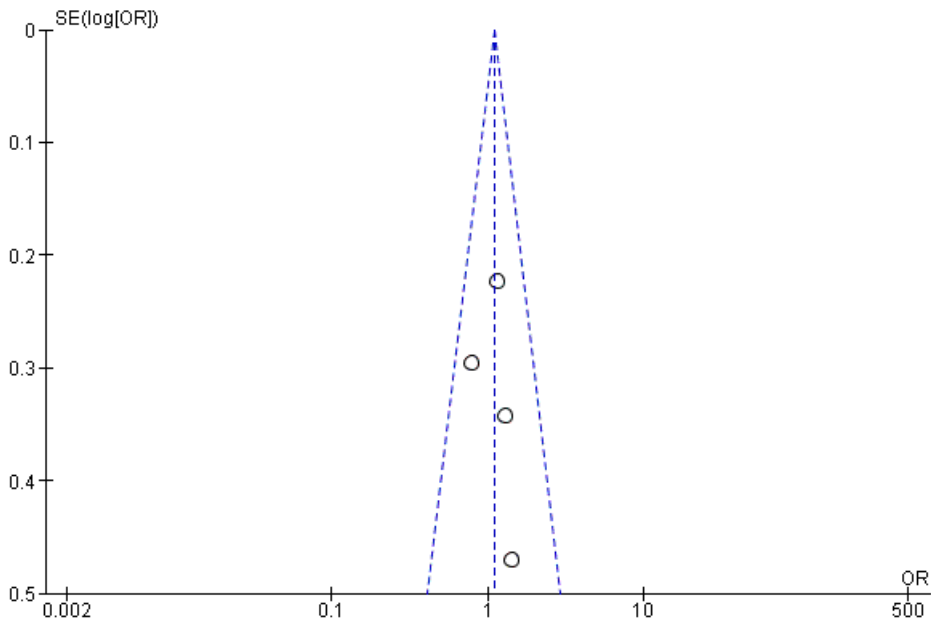

**Supplementary Figure S7c:** Funnel plot - *AGTR1* rs5186 investigation, individuals with IgA nephropathy compared to healthy controls in an East Asian population (*AGTR1* rs5186 A allele compared to C allele).

peer review only

**Supplementary Table S1: Search Terms**

| <b>Gene</b> | <b>Search Terms</b>                                                                                                                                                                                                                                                                                                                                                                                                                                                                                                                                                                                               |
|-------------|-------------------------------------------------------------------------------------------------------------------------------------------------------------------------------------------------------------------------------------------------------------------------------------------------------------------------------------------------------------------------------------------------------------------------------------------------------------------------------------------------------------------------------------------------------------------------------------------------------------------|
| <i>ACE</i>  | Angiotensin I Converting Enzyme<br>Angiotensin I Converting Enzyme (Peptidyl-Dipeptidase A) 1<br>Dipeptidyl Carboxypeptidase I<br>CD143 Antigen<br>Kininase II<br>DCP1<br>DCP<br>Angiotensin I Converting Enzyme Peptidyl-Dipeptidase A 1<br>Transcript<br>Angiotensin Converting Enzyme, Somatic Isoform<br>Peptidyl-Dipeptidase A<br>Carboxycathepsin<br>Testicular ECA<br>Peptidase P<br>EC 3.4.15.1<br>EC 3.2.1.-<br>CD143<br>MVCD3<br>ACE1<br>ACE<br>ICH<br><br><u>AND</u><br><br>Kidney<br>Nephrology<br>Nephropathy<br>Renal<br><br><u>AND</u><br><br>SNP<br>Polymorphism<br>Variant<br>Allele<br>Genotype |
| <i>ACE2</i> | Angiotensin I Converting Enzyme 2<br>Angiotensin I Converting Enzyme (Peptidyl-Dipeptidase A) 2<br>Angiotensin-Converting Enzyme Homolog<br>ACE-Related Carboxypeptidase<br>Metalloprotease MPROT15<br>Peptidyl-Dipeptidase A<br>ACEH<br>EC 3.4.17.23<br>EC 3.4.17<br>ACE2<br><br><u>AND</u>                                                                                                                                                                                                                                                                                                                      |

|              |                                                                                                                                                                                                                                                                                                                                                                                                                                                                                                                                                      |
|--------------|------------------------------------------------------------------------------------------------------------------------------------------------------------------------------------------------------------------------------------------------------------------------------------------------------------------------------------------------------------------------------------------------------------------------------------------------------------------------------------------------------------------------------------------------------|
|              | <p>Kidney<br/>Nephrology<br/>Nephropathy<br/>Renal</p> <p><u>AND</u></p> <p>SNP<br/>Polymorphism<br/>Variant<br/>Allele<br/>Genotype</p>                                                                                                                                                                                                                                                                                                                                                                                                             |
| <i>AGT</i>   | <p>Angiotensinogen<br/>Angiotensinogen (Serpine Peptidase Inhibitor, Clade A, Member 8)<br/>Serpine Peptidase Inhibitor, Clade A, Member 8<br/>Serpine A8<br/>SERPINA8<br/>Serine (Or Cysteine) Proteinase Inhibitor<br/>Alpha-1 Antiproteinase, Antitrypsin<br/>Alpha-1 Antiproteinase<br/>Pre-Angiotensinogen<br/>Angiotensin II<br/>Angiotensin I<br/>Antitrypsin<br/>ANHU<br/>AGT</p> <p><u>AND</u></p> <p>Kidney<br/>Nephrology<br/>Nephropathy<br/>Renal</p> <p><u>AND</u></p> <p>SNP<br/>Polymorphism<br/>Variant<br/>Allele<br/>Genotype</p> |
| <i>AGTR1</i> | <p>Angiotensin II Receptor Type 1<br/>Angiotensin II Receptor, Type 1<br/>AGTR1B<br/>AT1AR<br/>AT1BR<br/>AT2R1<br/>AT1<br/>Type-1B Angiotensin II Receptor<br/>Angiotensin II Type-1 Receptor<br/>Angiotensin Receptor 1B</p>                                                                                                                                                                                                                                                                                                                        |



|              |                                                                                                                                                                                                                                                                                                                                             |
|--------------|---------------------------------------------------------------------------------------------------------------------------------------------------------------------------------------------------------------------------------------------------------------------------------------------------------------------------------------------|
|              | <p>AGTR1A<br/> AT2R1B<br/> HAT1R<br/> AG2S<br/> AT1B<br/> AT1R<br/> AGTR1<br/> AT2R1A</p> <p><u>AND</u></p> <p>Kidney<br/> Nephrology<br/> Nephropathy<br/> Renal</p> <p><u>AND</u></p> <p>SNP<br/> Polymorphism<br/> Variant<br/> Allele<br/> Genotype</p>                                                                                 |
| <i>AGTR2</i> | <p>Angiotensin II Receptor Type 2<br/> Angiotensin II Receptor, Type 2<br/> Angiotensin II Type-2 Receptor<br/> AT2<br/> Angiotensin Receptor 2<br/> ATGR2<br/> MRX88</p> <p><u>AND</u></p> <p>Kidney<br/> Nephrology<br/> Nephropathy<br/> Renal</p> <p><u>AND</u></p> <p>SNP<br/> Polymorphism<br/> Variant<br/> Allele<br/> Genotype</p> |
| <i>REN</i>   | <p>Renin<br/> Angiotensinogenase<br/> EC 3.4.23.15<br/> Angiotensin-Forming Enzyme<br/> Renin Precursor, Renal<br/> EC 3.4.23</p>                                                                                                                                                                                                           |

|                                                      |                                                                                                                                                                  |
|------------------------------------------------------|------------------------------------------------------------------------------------------------------------------------------------------------------------------|
|                                                      | HNFJ2<br>REN<br><br><u>AND</u><br><br>Kidney<br>Nephrology<br>Nephropathy<br>Renal<br><br><u>AND</u><br><br>SNP<br>Polymorphism<br>Variant<br>Allele<br>Genotype |
| <i>Additional filters added to database searches</i> | English / Spanish language<br>Human studies<br>Case / Control studies<br>Not clinical trials<br>Not review articles<br>Not a case report<br>Not a meta-analysis  |

**Supplementary Table S2: Ethnicity Codes**

| <b>Population</b>                                    | <b>Population Code</b> |
|------------------------------------------------------|------------------------|
| Ad Mixed American (Southern USA and Central America) | AMR                    |
| African American                                     | AFR                    |
| East Asian                                           | EAS                    |
| European                                             | EUR                    |
| Middle Eastern                                       | ME                     |
| Mix of ethnicities                                   | MIX                    |
| North African                                        | NA                     |
| South Asian                                          | SAS                    |

For peer review only

**Supplementary Table S3a:** Excluded studies from the ACE search

\*Exclusion stage relates to the stage at which the article was removed as shown in the flow diagram (Supplementary Figure S1a)

| Exclusion Stage | Title                                                                                                                                                               | Authors            | Pubmed ID or WoS ID if Pubmed ID not available | Reason          |
|-----------------|---------------------------------------------------------------------------------------------------------------------------------------------------------------------|--------------------|------------------------------------------------|-----------------|
| 1               | Angiotensin I - Converting enzyme gene polymorphism modulates the consequences of in utero growth retardation on plasma insulin in young adults                     | Cambien F et al.   | 9519756                                        | No data for ACE |
| 1               | Clinical utility of chitotriosidase enzyme activity in nephropathic cystinosis.                                                                                     | Elmonem MA et al.  | 25407738                                       | No data for ACE |
| 1               | Polymorphisms in the gene encoding angiotensin I converting enzyme 2 and diabetic nephropathy                                                                       | Frojdo S et al.    | 16211375                                       | No data for ACE |
| 1               | Effects of erythropoietin, angiotensin II, and angiotensin-converting enzyme inhibitor on erythroid precursors in patients with posttransplantation erythrocytosis. | Glicklich D et al. | 10428268                                       | No data for ACE |
| 1               | DDOST, PRKCSH and LGALS3, which encode AGE-receptors 1, 2 and 3, respectively, are not associated with diabetic nephropathy in type 1 diabetes.                     | Hoverfelt A et al. | 20490454                                       | No data for ACE |
| 1               | Neuropeptide YY1 receptor polymorphism as a prognostic predictor in Japanese patients with IgA nephropathy                                                          | Ito H et al.       | 10363627                                       | No data for ACE |
| 1               | Manganese superoxide dismutase gene polymorphism (V16A) is associated with stages of albuminuria in Korean type 2 diabetic patients.                                | Lee SJ et al.      | 16324912                                       | No data for ACE |
| 1               | Impact of the preintervention rate of renal function decline on outcome of renoprotective intervention.                                                             | Lely AT et al.     | 18077786                                       | No data for ACE |

|    |   |                                                                                                                                                                                                |                     |          |                          |
|----|---|------------------------------------------------------------------------------------------------------------------------------------------------------------------------------------------------|---------------------|----------|--------------------------|
| 1  | 1 | Kinin-dependent hypersensitivity reactions in hemodialysis: metabolic and genetic factors.                                                                                                     | Molinaro G et al.   | 17003818 | No data for ACE          |
| 2  | 1 | Effect of a polymorphism of endothelial nitric oxide synthase gene in Japanese patients with IgA nephropathy.                                                                                  | Morita T et al.     | 10543322 | No data for ACE          |
| 3  | 1 | Nephropathy in type 1 diabetes: a manifestation of insulin resistance and multiple genetic susceptibilities? Further evidence from the Pittsburgh Epidemiology of Diabetes Complication Study. | Orchard TJ et al.   | 12164879 | No data for ACE          |
| 4  | 1 | Role of glycaemic control in development of microalbuminuria in patients with insulin dependent diabetes.                                                                                      | Powrie JK et al.    | 7819935  | No data for ACE          |
| 5  | 1 | Association of TNF- $\alpha$ -308 G > A and ACE I/D gene polymorphisms in hemodialysis patients with arteriovenous fistula thrombosis.                                                         | Sener EF et al.     | 24126814 | No data for ACE          |
| 6  | 1 | N-domain angiotensin I-converting enzyme expression in renal artery of Wistar, Wistar Kyoto, and spontaneously hypertensive rats                                                               | Bueno V et al.      | 15194348 | Non-human study          |
| 7  | 1 | Kallikrein and amylase contents in tissues from a mutant mouse model for human cystic fibrosis.                                                                                                | Catanzaro OL et al. | 6186886  | Non-human study          |
| 8  | 1 | Connexin 43 is not essential for the control of renin synthesis and secretion                                                                                                                  | Gerl M et al.       | 24062052 | Non-human study          |
| 9  | 1 | Multi-species comparative analysis of the equine ACE gene identifies a highly conserved potential transcription factor binding site in intron 16.                                              | Hamilton NA et al.  | 23408978 | Non-human study          |
| 10 | 1 | Renal angiotensin converting enzyme promotes renal damage during ureteral obstruction                                                                                                          | Stoneking BJ et al. | 9719278  | Non-human study          |
| 11 | 1 | Angiotensin-converting enzyme genotype is a predictive factor in the peak panel-reactive antibody response.                                                                                    | Akçay A et al.      | 15013293 | Not a case-control study |
| 12 | 1 | Association of the genetic polymorphisms of the renin-angiotensin system and endothelial nitric oxide synthase with chronic renal transplant dysfunction.                                      | Akçay A et al.      | 15385810 | Not a case-control study |

|    |                                                                                                                                                                                                                                                  |                      |          |                          |
|----|--------------------------------------------------------------------------------------------------------------------------------------------------------------------------------------------------------------------------------------------------|----------------------|----------|--------------------------|
| 1  | PAI-1 4G/5G and ACE I/D gene polymorphisms and the occurrence of myocardial infarction in patients on intermittent dialysis.                                                                                                                     | Aucella F et al.     | 12748347 | Not a case-control study |
| 2  |                                                                                                                                                                                                                                                  |                      |          |                          |
| 3  |                                                                                                                                                                                                                                                  |                      |          |                          |
| 4  |                                                                                                                                                                                                                                                  |                      |          |                          |
| 5  |                                                                                                                                                                                                                                                  |                      |          |                          |
| 6  |                                                                                                                                                                                                                                                  |                      |          |                          |
| 7  | Angiotensin-converting-enzyme insertion/deletion genotype and long-term renal allograft survival.                                                                                                                                                | Beige J et al.       | 9550656  | Not a case-control study |
| 8  |                                                                                                                                                                                                                                                  |                      |          |                          |
| 9  |                                                                                                                                                                                                                                                  |                      |          |                          |
| 10 | Deletion insertion polymorphism of the angiotensin converting enzyme gene and progression of diabetic nephropathy.                                                                                                                               | Bjorck S et al.      | 9269704  | Not a case-control study |
| 11 |                                                                                                                                                                                                                                                  |                      |          |                          |
| 12 |                                                                                                                                                                                                                                                  |                      |          |                          |
| 13 | Genetics of angiotensin I-converting enzyme                                                                                                                                                                                                      | Costerousse O et al. | 9247746  | Not a case-control study |
| 14 |                                                                                                                                                                                                                                                  |                      |          |                          |
| 15 | Captopril enhances transforming growth factor (TGF)-beta1 expression in peripheral blood mononuclear cells: a mechanism independent from angiotensin converting enzyme inhibition? A study in cyclosporine-treated kidney-transplanted patients. | Di Paolo S et al.    | 12499886 | Not a case-control study |
| 16 |                                                                                                                                                                                                                                                  |                      |          |                          |
| 17 |                                                                                                                                                                                                                                                  |                      |          |                          |
| 18 |                                                                                                                                                                                                                                                  |                      |          |                          |
| 19 |                                                                                                                                                                                                                                                  |                      |          |                          |
| 20 | Insertion/deletion polymorphism of the angiotensin-converting enzyme predicts left ventricular hypertrophy after renal transplantation.                                                                                                          | Fedor R et al.       | 21620105 | Not a case-control study |
| 21 |                                                                                                                                                                                                                                                  |                      |          |                          |
| 22 |                                                                                                                                                                                                                                                  |                      |          |                          |
| 23 | Antiproteinuric effect of candesartan cilexetil in Japanese subjects with type 2 diabetes and nephropathy.                                                                                                                                       | Haneda M et al.      | 15364166 | Not a case-control study |
| 24 |                                                                                                                                                                                                                                                  |                      |          |                          |
| 25 |                                                                                                                                                                                                                                                  |                      |          |                          |
| 26 | Association between Angiotensin I-Converting Enzyme Insertion/Deletion Polymorphism and Prognosis of Kidney Transplantation: A Meta-Analysis                                                                                                     | Huang ZK et al.      | 26000752 | Not a case-control study |
| 27 |                                                                                                                                                                                                                                                  |                      |          |                          |
| 28 |                                                                                                                                                                                                                                                  |                      |          |                          |
| 29 | Is there a role of angiotensin-converting enzyme gene polymorphism in the failure of arteriovenous femoral shunts for hemodialysis?                                                                                                              | Isbir CS et al.      | 11525534 | Not a case-control study |
| 30 |                                                                                                                                                                                                                                                  |                      |          |                          |
| 31 |                                                                                                                                                                                                                                                  |                      |          |                          |
| 32 |                                                                                                                                                                                                                                                  |                      |          |                          |
| 33 | Smoking has no impact on survival and it is not associated with ACE gene I/D polymorphism in hemodialysis patients.                                                                                                                              | Kiss I et al.        | 28058974 | Not a case-control study |
| 34 |                                                                                                                                                                                                                                                  |                      |          |                          |
| 35 |                                                                                                                                                                                                                                                  |                      |          |                          |
| 36 | Antihypertensive treatment modulates the association between the D/I ACE gene polymorphism and left ventricular hypertrophy: a meta-analysis                                                                                                     | Kuznetsova T et al.  | 10918550 | Not a case-control study |
| 37 |                                                                                                                                                                                                                                                  |                      |          |                          |
| 38 |                                                                                                                                                                                                                                                  |                      |          |                          |
| 39 |                                                                                                                                                                                                                                                  |                      |          |                          |
| 40 |                                                                                                                                                                                                                                                  |                      |          |                          |
| 41 |                                                                                                                                                                                                                                                  |                      |          |                          |
| 42 |                                                                                                                                                                                                                                                  |                      |          |                          |
| 43 |                                                                                                                                                                                                                                                  |                      |          |                          |
| 44 |                                                                                                                                                                                                                                                  |                      |          |                          |
| 45 |                                                                                                                                                                                                                                                  |                      |          |                          |
| 46 |                                                                                                                                                                                                                                                  |                      |          |                          |

|    |   |                                                                                                                                                                                                                                  |                       |          |                          |
|----|---|----------------------------------------------------------------------------------------------------------------------------------------------------------------------------------------------------------------------------------|-----------------------|----------|--------------------------|
| 1  | 1 | Genetics and the prediction of complications in type 1 diabetes                                                                                                                                                                  | Marre M               | 10097900 | Not a case-control study |
| 2  | 1 | Hereditary factors in the development of diabetic renal disease                                                                                                                                                                  | Marre M et al.        | 10922971 | Not a case-control study |
| 3  | 1 | The effect of angiotensin receptor blockade ARB on the regression of left ventricular hypertrophy in hemodialysis patients: comparison between patients with D allele and non-D allele ACE gene polymorphism.                    | Nakayama M et al.     | 16312263 | Not a case-control study |
| 4  | 1 | Role of ACE and IL-1 $\beta$ Gene Polymorphisms in Erythropoietin Hyporesponsive Patients with Chronic Kidney Disease with Anemia.                                                                                               | Nand N et al.         | 28457029 | Not a case-control study |
| 5  | 1 | Angiotensin-I converting enzyme insertion/deletion polymorphism and its association with diabetic nephropathy: a meta-analysis of studies reported between 1994 and 2004 and comprising 14,727 subjects                          | Ng D et al.           | 15830182 | Not a case-control study |
| 6  | 1 | Is the presence of retinopathy of practical value in defining cases of diabetic nephropathy in genetic association studies? The experience with the ACE insertion/deletion polymorphism in 53 studies comprising 17,791 subjects | Ng DPK et al.         | 18523141 | Not a case-control study |
| 7  | 1 | Correlates of ACE activity in macroalbuminuric type 2 diabetic patients treated with chronic ACE inhibition.                                                                                                                     | Nikzamir A et al.     | 17986476 | Not a case-control study |
| 8  | 1 | Insertion/deletion polymorphism in intron 16 of the ACE gene and left ventricular hypertrophy in patients with end-stage renal disease.                                                                                          | Osono E et al.        | 9820440  | Not a case-control study |
| 9  | 1 | Risk factors for the progression of microalbuminuria in Japanese type 2 diabetic patients - a 10-year follow-up study                                                                                                            | Oue T et al.          | 10580616 | Not a case-control study |
| 10 | 1 | Survival in type 2 diabetic patients in dialysis and the number of risk alleles in polymorphisms of the renin-angiotensin system genes.                                                                                          | Padro-Miquel A et al. | 19014923 | Not a case-control study |

|    |                                                                                                                                                                                                 |                                                                                                                                                                                 |                            |                          |                          |
|----|-------------------------------------------------------------------------------------------------------------------------------------------------------------------------------------------------|---------------------------------------------------------------------------------------------------------------------------------------------------------------------------------|----------------------------|--------------------------|--------------------------|
| 1  | Effect of deletion polymorphism of angiotensin converting enzyme gene on progression of diabetic nephropathy during inhibition of angiotensin converting enzyme: observational follow up study. | Parving HH et al.                                                                                                                                                               | 8806248                    | Not a case-control study |                          |
| 2  |                                                                                                                                                                                                 |                                                                                                                                                                                 |                            |                          |                          |
| 3  |                                                                                                                                                                                                 |                                                                                                                                                                                 |                            |                          |                          |
| 4  |                                                                                                                                                                                                 |                                                                                                                                                                                 |                            |                          |                          |
| 5  |                                                                                                                                                                                                 |                                                                                                                                                                                 |                            |                          |                          |
| 6  | 1                                                                                                                                                                                               | Altered activities of kininase II, an angiotensin converting enzyme, prekallikrein, and nitric oxide in Kuwaiti patients with type 2 diabetes                                   | Sharma JN et al.           | 25964383                 | Not a case-control study |
| 7  |                                                                                                                                                                                                 |                                                                                                                                                                                 |                            |                          |                          |
| 8  |                                                                                                                                                                                                 |                                                                                                                                                                                 |                            |                          |                          |
| 9  |                                                                                                                                                                                                 |                                                                                                                                                                                 |                            |                          |                          |
| 10 | 1                                                                                                                                                                                               | Impact of genetic polymorphisms of the renin-angiotensin system and of non-genetic factors on kidney transplant function--a single-center experience.                           | Siekierka-Harreis M et al. | 19681973                 | Not a case-control study |
| 11 |                                                                                                                                                                                                 |                                                                                                                                                                                 |                            |                          |                          |
| 12 |                                                                                                                                                                                                 |                                                                                                                                                                                 |                            |                          |                          |
| 13 |                                                                                                                                                                                                 |                                                                                                                                                                                 |                            |                          |                          |
| 14 | 1                                                                                                                                                                                               | Angiotensin-converting enzyme (ACE) inhibition in type 2, diabetic patients-- interaction with ACE insertion/deletion polymorphism.                                             | So WY et al.               | 16395257                 | Not a case-control study |
| 15 |                                                                                                                                                                                                 |                                                                                                                                                                                 |                            |                          |                          |
| 16 |                                                                                                                                                                                                 |                                                                                                                                                                                 |                            |                          |                          |
| 17 | 1                                                                                                                                                                                               | Microfluidic chip-based method for genotyping microsatellites, VNTRs and insertion/deletion polymorphisms.                                                                      | Sohni YR et al.            | 12554058                 | Not a case-control study |
| 18 |                                                                                                                                                                                                 |                                                                                                                                                                                 |                            |                          |                          |
| 19 |                                                                                                                                                                                                 |                                                                                                                                                                                 |                            |                          |                          |
| 20 | 1                                                                                                                                                                                               | M235T angiotensinogen gene polymorphism and cardiovascular renal risk                                                                                                           | Staessen JA et al.         | 10100088                 | Not a case-control study |
| 21 |                                                                                                                                                                                                 |                                                                                                                                                                                 |                            |                          |                          |
| 22 |                                                                                                                                                                                                 |                                                                                                                                                                                 |                            |                          |                          |
| 23 | 1                                                                                                                                                                                               | Mistyping of the human angiotensin-converting enzyme gene polymorphism: Frequency, causes and possible methods to avoid errors in typing                                        | Ueda S et al.              | 8863184                  | Not a case-control study |
| 24 |                                                                                                                                                                                                 |                                                                                                                                                                                 |                            |                          |                          |
| 25 |                                                                                                                                                                                                 |                                                                                                                                                                                 |                            |                          |                          |
| 26 | 1                                                                                                                                                                                               | Association between angiotensin-converting-enzyme gene polymorphism and failure of renoprotective therapy.                                                                      | van Essen GG et al.        | 8538349                  | Not a case-control study |
| 27 |                                                                                                                                                                                                 |                                                                                                                                                                                 |                            |                          |                          |
| 28 |                                                                                                                                                                                                 |                                                                                                                                                                                 |                            |                          |                          |
| 29 | 1                                                                                                                                                                                               | Contribution of gene polymorphisms in the renin-angiotensin system to macroangiopathy in patients with diabetic nephropathy.                                                    | Wong TY et al.             | 11431175                 | Not a case-control study |
| 30 |                                                                                                                                                                                                 |                                                                                                                                                                                 |                            |                          |                          |
| 31 |                                                                                                                                                                                                 |                                                                                                                                                                                 |                            |                          |                          |
| 32 | 1                                                                                                                                                                                               | Disease progression, response to ACEI/ATRA therapy and influence of ACE gene in IgA nephritis.                                                                                  | Woo KT et al.              | 17601378                 | Not a case-control study |
| 33 |                                                                                                                                                                                                 |                                                                                                                                                                                 |                            |                          |                          |
| 34 |                                                                                                                                                                                                 |                                                                                                                                                                                 |                            |                          |                          |
| 35 | 1                                                                                                                                                                                               | Angiotensin-converting enzyme inhibitor versus angiotensin 2 receptor antagonist therapy and the influence of angiotensin-converting enzyme gene polymorphism in IgA nephritis. | Woo KT et al.              | 18536822                 | Not a case-control study |
| 36 |                                                                                                                                                                                                 |                                                                                                                                                                                 |                            |                          |                          |
| 37 |                                                                                                                                                                                                 |                                                                                                                                                                                 |                            |                          |                          |
| 38 |                                                                                                                                                                                                 |                                                                                                                                                                                 |                            |                          |                          |
| 39 |                                                                                                                                                                                                 |                                                                                                                                                                                 |                            |                          |                          |
| 40 |                                                                                                                                                                                                 |                                                                                                                                                                                 |                            |                          |                          |
| 41 |                                                                                                                                                                                                 |                                                                                                                                                                                 |                            |                          |                          |
| 42 |                                                                                                                                                                                                 |                                                                                                                                                                                 |                            |                          |                          |
| 43 |                                                                                                                                                                                                 |                                                                                                                                                                                 |                            |                          |                          |
| 44 |                                                                                                                                                                                                 |                                                                                                                                                                                 |                            |                          |                          |
| 45 |                                                                                                                                                                                                 |                                                                                                                                                                                 |                            |                          |                          |
| 46 |                                                                                                                                                                                                 |                                                                                                                                                                                 |                            |                          |                          |



|    |                                                                                                                                                                                         |                      |          |                           |
|----|-----------------------------------------------------------------------------------------------------------------------------------------------------------------------------------------|----------------------|----------|---------------------------|
| 1  | Angiotensin converting enzyme gene polymorphism and development of post-transplant erythrocytosis.                                                                                      | Yildiz A et al.      | 12832741 | Not a case-control study  |
| 2  |                                                                                                                                                                                         |                      |          |                           |
| 3  |                                                                                                                                                                                         |                      |          |                           |
| 4  |                                                                                                                                                                                         |                      |          |                           |
| 5  |                                                                                                                                                                                         |                      |          |                           |
| 6  | Gene polymorphisms of the renin-angiotensin-aldosterone system and angiotensin II type 1-receptor activating antibodies in renal rejection.                                             | Zhang G et al.       | 17984617 | Not a case-control study  |
| 7  |                                                                                                                                                                                         |                      |          |                           |
| 8  |                                                                                                                                                                                         |                      |          |                           |
| 9  |                                                                                                                                                                                         |                      |          |                           |
| 10 | Angiotensin-converting enzyme gene polymorphism in Kuwaiti patients with systemic lupus erythematosus.                                                                                  | Al-Awadhi AM et al.  | 17631741 | Not a renal disease focus |
| 11 |                                                                                                                                                                                         |                      |          |                           |
| 12 |                                                                                                                                                                                         |                      |          |                           |
| 13 | Association of Angiotensin Converting Enzyme Insertion-Deletion Polymorphism with Hypertension in Emiratis with Type 2 Diabetes Mellitus and Its Interaction with Obesity Status.       | Alsafar H et al.     | 26491214 | Not a renal disease focus |
| 14 |                                                                                                                                                                                         |                      |          |                           |
| 15 |                                                                                                                                                                                         |                      |          |                           |
| 16 | Association of ACE gene D polymorphism with left ventricular hypertrophy in patients with diastolic heart failure: a case-control study.                                                | Bahramali E et al.   | 26861937 | Not a renal disease focus |
| 17 |                                                                                                                                                                                         |                      |          |                           |
| 18 |                                                                                                                                                                                         |                      |          |                           |
| 19 | A novel human heparanase splice variant, T5, endowed with protumorigenic characteristics.                                                                                               | Barash U et al.      | 20007507 | Not a renal disease focus |
| 20 |                                                                                                                                                                                         |                      |          |                           |
| 21 |                                                                                                                                                                                         |                      |          |                           |
| 22 | Synergistic effect of alpha-adducin and ACE genes causes blood pressure changes with body sodium and volume expansion.                                                                  | Barlassina C et al.  | 10720960 | Not a renal disease focus |
| 23 |                                                                                                                                                                                         |                      |          |                           |
| 24 |                                                                                                                                                                                         |                      |          |                           |
| 25 | Isolated polycystic liver disease genes define effectors of polycystin-1 function.                                                                                                      | Besse W et al.       | 28375157 | Not a renal disease focus |
| 26 |                                                                                                                                                                                         |                      |          |                           |
| 27 |                                                                                                                                                                                         |                      |          |                           |
| 28 | Association between plasma activities of semicarbazide-sensitive amine oxidase and angiotensin-converting enzyme in patients with type 1 diabetes mellitus.                             | Boomsma F et al.     | 15830186 | Not a renal disease focus |
| 29 |                                                                                                                                                                                         |                      |          |                           |
| 30 |                                                                                                                                                                                         |                      |          |                           |
| 31 | CCL18: a urinary marker of Gaucher cell burden in Gaucher patients.                                                                                                                     | Boot RG et al.       | 16736095 | Not a renal disease focus |
| 32 |                                                                                                                                                                                         |                      |          |                           |
| 33 |                                                                                                                                                                                         |                      |          |                           |
| 34 | Renin-angiotensin system gene polymorphisms: assessment of the risk of coronary heart disease.                                                                                          | Buraczynska M et al. | 14502296 | Not a renal disease focus |
| 35 |                                                                                                                                                                                         |                      |          |                           |
| 36 |                                                                                                                                                                                         |                      |          |                           |
| 37 | Angiotensin-converting enzyme (ACE) haplotypes and cyclosporine A (CsA) response: a model of the complex relationship between ACE quantitative trait locus and pathological phenotypes. | Catarsi P et al.     | 16002416 | Not a renal disease focus |
| 38 |                                                                                                                                                                                         |                      |          |                           |
| 39 |                                                                                                                                                                                         |                      |          |                           |
| 40 |                                                                                                                                                                                         |                      |          |                           |
| 41 |                                                                                                                                                                                         |                      |          |                           |
| 42 |                                                                                                                                                                                         |                      |          |                           |
| 43 |                                                                                                                                                                                         |                      |          |                           |
| 44 |                                                                                                                                                                                         |                      |          |                           |
| 45 |                                                                                                                                                                                         |                      |          |                           |
| 46 |                                                                                                                                                                                         |                      |          |                           |

|    |   |                                                                                                                                                                                |                          |          |                           |
|----|---|--------------------------------------------------------------------------------------------------------------------------------------------------------------------------------|--------------------------|----------|---------------------------|
| 1  | 1 | A study on the association between angiotensin-I converting enzyme I/D dimorphism and type-2 diabetes mellitus.                                                                | Chmaisse HN et al.       | 19861867 | Not a renal disease focus |
| 2  | 1 | alpha-adducin and angiotensin I-converting enzyme polymorphisms in essential hypertension                                                                                      | Clark CJ et al.          | 11116113 | Not a renal disease focus |
| 3  | 1 | Elevated urinary albumin excretion is not linked to the angiotensin I-converting enzyme gene polymorphism in clinically healthy subjects                                       | Clausen P et al.         | 10872702 | Not a renal disease focus |
| 4  | 1 | Association of renin-angiotensin and endothelial nitric oxide synthase gene polymorphisms with blood pressure progression and incident hypertension: prospective cohort study. | Conen D et al.           | 18698212 | Not a renal disease focus |
| 5  | 1 | Angiotensin I-converting enzyme (kininase II) in cardiovascular and renal regulations and diseases                                                                             | Costerousse O et al.     | 9830503  | Not a renal disease focus |
| 6  | 1 | ACE and PC-1 gene polymorphisms in normoalbuminuric Type 1 diabetic patients: a 10-year prospective study.                                                                     | de Azevedo MJ et al.     | 12126783 | Not a renal disease focus |
| 7  | 1 | Insertion/Deletion Polymorphism of Angiotensin I-converting Enzyme Gene Is Linked With Chromophobe Renal Cell Carcinoma                                                        | de Martino M et al.      | 21477733 | Not a renal disease focus |
| 8  | 1 | Polymorphisms in genes of the renin-angiotensin-aldosterone system and renal cell cancer risk: interplay with hypertension and intakes of sodium, potassium and fluid.         | Deckers IA et al.        | 24978482 | Not a renal disease focus |
| 9  | 1 | ACE gene insertion/deletion polymorphism modulates capillary permeability in hypertension                                                                                      | Dell'omo G et al.        | 16889537 | Not a renal disease focus |
| 10 | 1 | Genetic polymorphisms associated with exertional rhabdomyolysis                                                                                                                | Deuster PA et al.        | 23543093 | Not a renal disease focus |
| 11 | 1 | Distribution of different HLA antigens in Greek hypertensives according to the angiotensin-converting enzyme genotype.                                                         | Diamantopoulos EJ et al. | 10821349 | Not a renal disease focus |
| 12 | 1 | Are the angiotensin-converting enzyme gene and activity risk factors for stroke?                                                                                               | Dikmen M et al.          | 16791358 | Not a renal disease focus |
| 13 | 1 | Angiotensin-converting enzyme (insertion/deletion) and endothelial nitric oxide synthase polymorphisms in patients with systemic lupus erythematosus.                          | Douglas G et al.         | 15338496 | Not a renal disease focus |

|    |                                                                                                                   |                                                                                                                                                                           |                   |                           |                           |
|----|-------------------------------------------------------------------------------------------------------------------|---------------------------------------------------------------------------------------------------------------------------------------------------------------------------|-------------------|---------------------------|---------------------------|
| 1  | Abnormal hepatocystin caused by truncating PRKCSH mutations leads to autosomal dominant polycystic liver disease. | Drenth JP et al.                                                                                                                                                          | 15057895          | Not a renal disease focus |                           |
| 2  |                                                                                                                   |                                                                                                                                                                           |                   |                           |                           |
| 3  |                                                                                                                   |                                                                                                                                                                           |                   |                           |                           |
| 4  | 1                                                                                                                 | The angiotensin I-converting enzyme gene insertion/deletion polymorphism is linked to early gastric cancer                                                                | Ebert MPA et al.  | 16365022                  | Not a renal disease focus |
| 5  |                                                                                                                   |                                                                                                                                                                           |                   |                           |                           |
| 6  |                                                                                                                   |                                                                                                                                                                           |                   |                           |                           |
| 7  | 1                                                                                                                 | Association of chitotriosidase enzyme activity and genotype with the risk of nephropathy in type 2 diabetes.                                                              | Elmonem MA et al. | 26589000                  | Not a renal disease focus |
| 8  |                                                                                                                   |                                                                                                                                                                           |                   |                           |                           |
| 9  |                                                                                                                   |                                                                                                                                                                           |                   |                           |                           |
| 10 | 1                                                                                                                 | Relationship of bradykinin B2 receptor gene polymorphism with essential hypertension and left ventricular hypertrophy.                                                    | Fu Y et al.       | 15894833                  | Not a renal disease focus |
| 11 |                                                                                                                   |                                                                                                                                                                           |                   |                           |                           |
| 12 |                                                                                                                   |                                                                                                                                                                           |                   |                           |                           |
| 13 | 1                                                                                                                 | Deletion polymorphism of the angiotensin-converting enzyme gene is independently associated with left ventricular mass and geometric remodeling in systemic hypertension. | Gharavi AG et al. | 8677872                   | Not a renal disease focus |
| 14 |                                                                                                                   |                                                                                                                                                                           |                   |                           |                           |
| 15 |                                                                                                                   |                                                                                                                                                                           |                   |                           |                           |
| 16 | 1                                                                                                                 | The presence of PAI-1 4G/5G and ACE DD genotypes increases the risk of early-stage AVF thrombosis in hemodialysis patients.                                               | Gungor Y et al.   | 21332339                  | Not a renal disease focus |
| 17 |                                                                                                                   |                                                                                                                                                                           |                   |                           |                           |
| 18 |                                                                                                                   |                                                                                                                                                                           |                   |                           |                           |
| 19 | 1                                                                                                                 | The Captopril Prevention Project (CAPPP) in hypertension--baseline data and current status.                                                                               | Hansson L et al.  | 9495662                   | Not a renal disease focus |
| 20 |                                                                                                                   |                                                                                                                                                                           |                   |                           |                           |
| 21 |                                                                                                                   |                                                                                                                                                                           |                   |                           |                           |
| 22 | 1                                                                                                                 | Relationship of eNOS gene variants to diseases that have in common an endothelial cell dysfunction.                                                                       | Heltianu C et al. | 15784171                  | Not a renal disease focus |
| 23 |                                                                                                                   |                                                                                                                                                                           |                   |                           |                           |
| 24 |                                                                                                                   |                                                                                                                                                                           |                   |                           |                           |
| 25 | 1                                                                                                                 | Relationship of the angiotensin-converting enzyme gene polymorphism to glucose intolerance, insulin resistance, and hypertension in NIDDM.                                | Huang XH et al.   | 9544854                   | Not a renal disease focus |
| 26 |                                                                                                                   |                                                                                                                                                                           |                   |                           |                           |
| 27 |                                                                                                                   |                                                                                                                                                                           |                   |                           |                           |
| 28 | 1                                                                                                                 | Distribution of human leukocyte antigen alleles in systemic lupus erythematosus patients with angiotensin converting enzyme insertion/deletion polymorphism.              | Hussain N et al.  | 23448612                  | Not a renal disease focus |
| 29 |                                                                                                                   |                                                                                                                                                                           |                   |                           |                           |
| 30 |                                                                                                                   |                                                                                                                                                                           |                   |                           |                           |
| 31 | 1                                                                                                                 | Comprehensive analysis of the renin-angiotensin gene polymorphisms with relation to hypertension in the Japanese                                                          | Kato N et al.     | 10953993                  | Not a renal disease focus |
| 32 |                                                                                                                   |                                                                                                                                                                           |                   |                           |                           |
| 33 |                                                                                                                   |                                                                                                                                                                           |                   |                           |                           |
| 34 | 1                                                                                                                 | Association of clinical manifestations with HLA-B alleles in Takayasu arteritis                                                                                           | Kitamura H et al. | 9951811                   | Not a renal disease focus |
| 35 |                                                                                                                   |                                                                                                                                                                           |                   |                           |                           |
| 36 |                                                                                                                   |                                                                                                                                                                           |                   |                           |                           |
| 37 | 1                                                                                                                 | Lys(173)Arg and -344T/C variants of CYP11B2 in Japanese patients with low-renin hypertension.                                                                             | Komiya I et al.   | 10720581                  | Not a renal disease focus |
| 38 |                                                                                                                   |                                                                                                                                                                           |                   |                           |                           |
| 39 |                                                                                                                   |                                                                                                                                                                           |                   |                           |                           |
| 40 |                                                                                                                   |                                                                                                                                                                           |                   |                           |                           |
| 41 |                                                                                                                   |                                                                                                                                                                           |                   |                           |                           |
| 42 |                                                                                                                   |                                                                                                                                                                           |                   |                           |                           |
| 43 |                                                                                                                   |                                                                                                                                                                           |                   |                           |                           |
| 44 |                                                                                                                   |                                                                                                                                                                           |                   |                           |                           |
| 45 |                                                                                                                   |                                                                                                                                                                           |                   |                           |                           |
| 46 |                                                                                                                   |                                                                                                                                                                           |                   |                           |                           |

|    |                                                                                                                                                                                              |                    |          |                           |
|----|----------------------------------------------------------------------------------------------------------------------------------------------------------------------------------------------|--------------------|----------|---------------------------|
| 1  | Effects of angiotensin-converting enzyme gene polymorphism and serum vitamin D levels on ambulatory blood pressure measurement and left ventricular mass in Turkish hypertensive population. | Kulah E et al.     | 17625392 | Not a renal disease focus |
| 2  |                                                                                                                                                                                              |                    |          |                           |
| 3  |                                                                                                                                                                                              |                    |          |                           |
| 4  |                                                                                                                                                                                              |                    |          |                           |
| 5  |                                                                                                                                                                                              |                    |          |                           |
| 6  | 1                                                                                                                                                                                            |                    |          |                           |
| 7  | Efficacy of Korean Red Ginseng by Single Nucleotide Polymorphism in Obese Women: Randomized, Double-blind, Placebo-controlled Trial                                                          | Kwon DH et al.     | 23717118 | Not a renal disease focus |
| 8  |                                                                                                                                                                                              |                    |          |                           |
| 9  |                                                                                                                                                                                              |                    |          |                           |
| 10 |                                                                                                                                                                                              |                    |          |                           |
| 11 |                                                                                                                                                                                              |                    |          |                           |
| 12 | 1                                                                                                                                                                                            |                    |          |                           |
| 13 | Angiotensin-Converting Enzyme Gene Polymorphism Has No Influence On The Circulating Renin-Angiotensin-Aldosterone System Or Blood-Pressure In Normotensive Subjects                          | Lachurie MI et al. | 7796503  | Not a renal disease focus |
| 14 |                                                                                                                                                                                              |                    |          |                           |
| 15 | 1                                                                                                                                                                                            |                    |          |                           |
| 16 | Mutations in PRKCSH cause isolated autosomal dominant polycystic liver disease.                                                                                                              | Li A et al.        | 12529853 | Not a renal disease focus |
| 17 |                                                                                                                                                                                              |                    |          |                           |
| 18 | 1                                                                                                                                                                                            |                    |          |                           |
| 19 | Angiotensin-converting enzyme (ACE) gene II genotype protects against the development of diabetic peripheral neuropathy in type 2 diabetes mellitus.                                         | Mansoor Q et al.   | 22607040 | Not a renal disease focus |
| 20 |                                                                                                                                                                                              |                    |          |                           |
| 21 | 1                                                                                                                                                                                            |                    |          |                           |
| 22 | Renal changes on hyperglycemia and angiotensin-converting enzyme in type 1 diabetes                                                                                                          | Marre M et al.     | 10082486 | Not a renal disease focus |
| 23 |                                                                                                                                                                                              |                    |          |                           |
| 24 | 1                                                                                                                                                                                            |                    |          |                           |
| 25 | Detection of the association between a deletion polymorphism in the gene encoding angiotensin I-converting enzyme and advanced diabetic retinopathy                                          | Matsumoto A et al. | 11106834 | Not a renal disease focus |
| 26 |                                                                                                                                                                                              |                    |          |                           |
| 27 | 1                                                                                                                                                                                            |                    |          |                           |
| 28 | Association of the D allele of the angiotensin I converting enzyme polymorphism with malignant vascular injury                                                                               | Mayer NJ et al.    | 11836444 | Not a renal disease focus |
| 29 |                                                                                                                                                                                              |                    |          |                           |
| 30 | 1                                                                                                                                                                                            |                    |          |                           |
| 31 | Late-onset acid maltase deficiency. Detection of patients and heterozygotes by urinary enzyme assay.                                                                                         | Mehler M et al.    | 9923     | Not a renal disease focus |
| 32 |                                                                                                                                                                                              |                    |          |                           |
| 33 | 1                                                                                                                                                                                            |                    |          |                           |
| 34 | Association of polymorphisms of angiotensin I converting enzyme 2 with retinopathy in type 2 diabetes mellitus among Chinese individuals                                                     | Meng N et al.      | 25359286 | Not a renal disease focus |
| 35 |                                                                                                                                                                                              |                    |          |                           |
| 36 | 1                                                                                                                                                                                            |                    |          |                           |
| 37 | Angiotensin converting enzyme gene polymorphism and renal hemodynamic function in early diabetes.                                                                                            | Miller JA et al.   | 8995725  | Not a renal disease focus |
| 38 |                                                                                                                                                                                              |                    |          |                           |
| 39 |                                                                                                                                                                                              |                    |          |                           |
| 40 |                                                                                                                                                                                              |                    |          |                           |
| 41 |                                                                                                                                                                                              |                    |          |                           |
| 42 |                                                                                                                                                                                              |                    |          |                           |
| 43 |                                                                                                                                                                                              |                    |          |                           |
| 44 |                                                                                                                                                                                              |                    |          |                           |
| 45 |                                                                                                                                                                                              |                    |          |                           |
| 46 |                                                                                                                                                                                              |                    |          |                           |

|    |   |                                                                                                                                                                 |                      |          |                           |
|----|---|-----------------------------------------------------------------------------------------------------------------------------------------------------------------|----------------------|----------|---------------------------|
| 1  | 1 | Genetic risk for renal artery stenosis: association with deletion polymorphism in angiotensin 1-converting enzyme gene.                                         | Missouris CG et al.  | 8821841  | Not a renal disease focus |
| 2  | 1 | Renal ACE immunohistochemical localization in NIDDM patients with nephropathy.                                                                                  | Mizuri S et al.      | 9469501  | Not a renal disease focus |
| 3  | 1 | Association of B2 receptor polymorphisms and ACE activity with ACE inhibitor-induced angioedema in black and mixed-race South Africans.                         | Moholisa RR et al.   | 23730990 | Not a renal disease focus |
| 4  | 1 | Renal outcome and vascular morbidity in systemic lupus erythematosus (SLE): lack of association with the angiotensin-converting enzyme gene polymorphism.       | Molad Y et al.       | 11071585 | Not a renal disease focus |
| 5  | 1 | Contribution of angiotensin I converting enzyme gene polymorphism and angiotensinogen gene polymorphism to blood pressure regulation in essential hypertension. | Mondorf UF et al.    | 9524045  | Not a renal disease focus |
| 6  | 1 | Inhibition of tissue angiotensin converting enzyme activity prevents malignant hypertension in TGR(mREN2)27.                                                    | Montgomery HE et al. | 9797175  | Not a renal disease focus |
| 7  | 1 | Independent, Marked Associations Of Alleles Of The Insulin-Receptor And Dipeptidyl Carboxypeptidase-I Genes With Essential-Hypertension                         | Morris Bj et al.     | 8104754  | Not a renal disease focus |
| 8  | 1 | Increased D allele frequency of the angiotensin-converting enzyme gene in pulmonary fibrosis.                                                                   | Morrison CD et al.   | 11381371 | Not a renal disease focus |
| 9  | 1 | Angiotensin converting enzyme (ACE) insertion/deletion (I/D) polymorphism, and diabetic retinopathy in subjects with IDDM and NIDDM.                            | Nagi DK et al.       | 8582133  | Not a renal disease focus |
| 10 | 1 | Angiotensin-converting enzyme (ACE) gene insertion/deletion polymorphism is not a risk factor for hypertension in SLE nephritis.                                | Negi VS et al.       | 25957879 | Not a renal disease focus |
| 11 | 1 | Carotid intima-media thickness and ACE-gene polymorphism in hemodialysis patients.                                                                              | Nergizoglu G et al.  | 10493570 | Not a renal disease focus |
| 12 | 1 | Association of angiotensin-converting enzyme gene insertion/deletion polymorphism with metabolic syndrome in Iranians with type 2 diabetes mellitus.            | Nikzamir A et al.    | 18154415 | Not a renal disease focus |

|    |   |                                                                                                                                                                                              |                             |          |                           |
|----|---|----------------------------------------------------------------------------------------------------------------------------------------------------------------------------------------------|-----------------------------|----------|---------------------------|
| 1  | 1 | Angiotensin Converting Enzyme Gene Insertion/Deletion Variant and Familial Mediterranean Fever-related Amyloidosis.                                                                          | Nursal AF et al.            | 29891744 | Not a renal disease focus |
| 2  | 1 | Pharmacogenetic analysis of the effect of angiotensin-converting enzyme inhibitor on restenosis after percutaneous transluminal coronary angioplasty.                                        | Okamura A et al.            | 10535720 | Not a renal disease focus |
| 3  | 1 | Genetic polymorphisms of the renin-angiotensin system and atheromatous renal artery stenosis.                                                                                                | Olivieri O et al.           | 10567188 | Not a renal disease focus |
| 4  | 1 | Different impact of deletion polymorphism of gene on the risk of renal and coronary artery disease.                                                                                          | Olivieri O et al.           | 11791024 | Not a renal disease focus |
| 5  | 1 | Increased frequency of the angiotensin-converting enzyme gene D-allele is associated with noninfectious pulmonary dysfunction following allogeneic stem cell transplant.                     | Onizuka M et al.            | 16044138 | Not a renal disease focus |
| 6  | 1 | Hepatocystin is Essential for TRPM7 Function During Early Embryogenesis.                                                                                                                     | Overton JD et al.           | 26671672 | Not a renal disease focus |
| 7  | 1 | Angiotensin-converting enzyme and angiotensin II receptor subtype 2 genotypes in type 1 diabetes and severe hypoglycaemia requiring emergency treatment: a case cohort study.                | Pedersen-Bjergaard U et al. | 19820429 | Not a renal disease focus |
| 8  | 1 | Impact of maternal angiotensinogen M235T polymorphism and angiotensin-converting enzyme insertion/deletion polymorphism on blood pressure, protein excretion and fetal outcome in pregnancy. | Pfab T et al.               | 17563539 | Not a renal disease focus |
| 9  | 1 | Renovascular disease: effect of ACE gene deletion polymorphism and endovascular revascularization.                                                                                           | Pizzolo F et al.            | 14718831 | Not a renal disease focus |
| 10 | 1 | Angiotensin-converting enzyme gene polymorphism in patients with systemic lupus.                                                                                                             | Prkacin I et al.            | 11505631 | Not a renal disease focus |
| 11 | 1 | The relationship between ACE/AGT gene polymorphisms and the risk of diabetic retinopathy in Chinese patients with type 2 diabetes.                                                           | Qiao YC et al.              | 29378484 | Not a renal disease focus |
| 12 | 1 | Association of angiotensin-converting enzyme gene dimorphisms with severity of lupus disease.                                                                                                | Rabbani MA et al.           | 18711292 | Not a renal disease focus |

|    |                                                                                                                                                                                            |                           |          |                           |
|----|--------------------------------------------------------------------------------------------------------------------------------------------------------------------------------------------|---------------------------|----------|---------------------------|
| 1  | Leukocyte beta-glucosidase in homozygotes and heterozygotes for Gaucher disease.                                                                                                           | Raghavan SS et al.        | 6770675  | Not a renal disease focus |
| 2  |                                                                                                                                                                                            |                           |          |                           |
| 3  |                                                                                                                                                                                            |                           |          |                           |
| 4  |                                                                                                                                                                                            |                           |          |                           |
| 5  |                                                                                                                                                                                            |                           |          |                           |
| 6  |                                                                                                                                                                                            |                           |          |                           |
| 7  | Association of angiotensinogen M235T and A(-6)G gene polymorphisms with coronary heart disease with independence of essential hypertension: the PROCAGENE study. Prospective Cardiac Gene. | Rodriquez-Perez JC et al. | 11345362 | Not a renal disease focus |
| 8  |                                                                                                                                                                                            |                           |          |                           |
| 9  |                                                                                                                                                                                            |                           |          |                           |
| 10 |                                                                                                                                                                                            |                           |          |                           |
| 11 | Testing of potential glycan-based heparanase inhibitors in a fluorescence activity assay using either bacterial heparinase II or human heparanase.                                         | Schoenfeld AK et al.      | 24667567 | Not a renal disease focus |
| 12 |                                                                                                                                                                                            |                           |          |                           |
| 13 |                                                                                                                                                                                            |                           |          |                           |
| 14 |                                                                                                                                                                                            |                           |          |                           |
| 15 | Angiotensin-converting enzyme gene I/D polymorphism increases the susceptibility to hypertension and additive diseases: A study on North Indian patients.                                  | Singh M et al.            | 27030424 | Not a renal disease focus |
| 16 |                                                                                                                                                                                            |                           |          |                           |
| 17 |                                                                                                                                                                                            |                           |          |                           |
| 18 | Association of APOE (Hha1) and ACE (I/D) gene polymorphisms with type 2 diabetes mellitus in North West India                                                                              | Singh PP et al.           | 16621107 | Not a renal disease focus |
| 19 |                                                                                                                                                                                            |                           |          |                           |
| 20 |                                                                                                                                                                                            |                           |          |                           |
| 21 | Angiotensin-converting enzyme gene I/D polymorphism in malignant hypertension.                                                                                                             | Stefansson B et al.       | 10855732 | Not a renal disease focus |
| 22 |                                                                                                                                                                                            |                           |          |                           |
| 23 |                                                                                                                                                                                            |                           |          |                           |
| 24 | Increased amount of the angiotensin-converting enzyme (ACE) mRNA originating from the ACE allele with deletion.                                                                            | Suehiro T et al.          | 15164285 | Not a renal disease focus |
| 25 |                                                                                                                                                                                            |                           |          |                           |
| 26 | Genetic variants in hypertensive patients with coronary artery disease and coexisting atheromatous renal artery stenosis.                                                                  | Szperl M et al.           | 19043368 | Not a renal disease focus |
| 27 |                                                                                                                                                                                            |                           |          |                           |
| 28 |                                                                                                                                                                                            |                           |          |                           |
| 29 | Angiotensin I converting enzyme gene polymorphisms in systemic lupus erythematosus: decreased prevalence of DD genotype in African American patients                                       | Tassiulas IO et al.       | 9710341  | Not a renal disease focus |
| 30 |                                                                                                                                                                                            |                           |          |                           |
| 31 |                                                                                                                                                                                            |                           |          |                           |
| 32 | Albuminuria and the renin-angiotensin system gene polymorphisms in type-2-diabetic and in normoglycemic hypertensive Chinese.                                                              | Thomas GN et al.          | 11200871 | Not a renal disease focus |
| 33 |                                                                                                                                                                                            |                           |          |                           |
| 34 |                                                                                                                                                                                            |                           |          |                           |
| 35 | Peripheral vascular disease in Type 2 diabetic Chinese patients: associations with metabolic indices, concomitant vascular disease and genetic factors.                                    | Thomas GN et al.          | 14632699 | Not a renal disease focus |
| 36 |                                                                                                                                                                                            |                           |          |                           |
| 37 |                                                                                                                                                                                            |                           |          |                           |
| 38 | Angiotensin-converting enzyme gene polymorphism and vascular manifestations in Korean patients with SLE.                                                                                   | Uhm WS et al.             | 12043886 | Not a renal disease focus |
| 39 |                                                                                                                                                                                            |                           |          |                           |
| 40 |                                                                                                                                                                                            |                           |          |                           |
| 41 |                                                                                                                                                                                            |                           |          |                           |
| 42 |                                                                                                                                                                                            |                           |          |                           |
| 43 |                                                                                                                                                                                            |                           |          |                           |
| 44 |                                                                                                                                                                                            |                           |          |                           |
| 45 |                                                                                                                                                                                            |                           |          |                           |
| 46 |                                                                                                                                                                                            |                           |          |                           |

|   |                                                                                                                                                                                     |                      |                     |                           |
|---|-------------------------------------------------------------------------------------------------------------------------------------------------------------------------------------|----------------------|---------------------|---------------------------|
| 1 | Genetic risk of atherosclerotic renal artery disease: the candidate gene approach in a renal angiography cohort.                                                                    | van Onna M et al.    | 15326089            | Not a renal disease focus |
| 1 | Angiotensin I-converting enzyme and angiotensinogen gene interaction and prediction of essential hypertension                                                                       | Vasku A et al.       | 9607178             | Not a renal disease focus |
| 1 | Association between ACE gene polymorphisms and Alzheimer's disease in Han population in Hebei Peninsula                                                                             | Wang XL et al.       | WOS:000412148800122 | Not a renal disease focus |
| 1 | COL4A1 mutations in patients with sporadic late-onset intracerebral hemorrhage                                                                                                      | Weng YC et al.       | 22522439            | Not a renal disease focus |
| 1 | Increased expression of angiotensin II type 1 receptor (AGTR1) in heart transplant recipients with recurrent rejection.                                                             | Yamani MH et al.     | 17097490            | Not a renal disease focus |
| 1 | No association between deletion-type angiotensin-converting enzyme gene polymorphism and left-ventricular hypertrophy in hemodialysis patients.                                     | Yildiz A et al.      | 10657713            | Not a renal disease focus |
| 1 | Frequencies Of Variants Of Candidate Genes In Different Age-Groups Of Hypertensives                                                                                                 | Zee Ryl et al.       | 7882587             | Not a renal disease focus |
| 1 | [Renin-angiotensin system genes in chronic glomerulonephritis].                                                                                                                     | Buraczynska M et al. | 11865575            | Not English or Spanish    |
| 1 | [Association of the renin-angiotensin system gene polymorphism with nephropathy in type II diabetes].                                                                               | Buraczynska M et al. | 12476891            | Not English or Spanish    |
| 1 | [Genetic predisposition to systemic complications of arterial hypertension in maintenance haemodialysis patients].                                                                  | Bzoma B et al.       | 19112833            | Not English or Spanish    |
| 1 | [Is PstI polymorphism of the angiotensin I converting enzyme gene associated with nephropathy development in non-insulin-dependent diabetes mellitus (preliminary study)].          | Grzeszczak W et al.  | 9499204             | Not English or Spanish    |
| 1 | [Angiotensin-converting enzyme gene polymorphism and the clinical pathological features and progression in lupus nephritis].                                                        | Guan T et al.        | 10436947            | Not English or Spanish    |
| 1 | [I/D relationship between polymorphism of ACE gene and progression of chronic glomerulonephritis].                                                                                  | Kaliev RR et al.     | 16078593            | Not English or Spanish    |
| 1 | [Association of the complex of polymorphic markers of ACE genes, aldosterone synthetase and endothelial synthetase of nitric oxide with progression of chronic glomerulonephritis]. | Kamysheva ES et al.  | 15532370            | Not English or Spanish    |



|    |                                                                                                                            |                                                                                                                                                                                                                     |                       |                        |                        |
|----|----------------------------------------------------------------------------------------------------------------------------|---------------------------------------------------------------------------------------------------------------------------------------------------------------------------------------------------------------------|-----------------------|------------------------|------------------------|
| 1  | [Angiotensin-converting enzyme insertion/deletion polymorphism and blood pressure regulation in type 2 diabetic patients]. | Krajina-Andricevic M et al.                                                                                                                                                                                         | 23120809              | Not English or Spanish |                        |
| 2  |                                                                                                                            |                                                                                                                                                                                                                     |                       |                        |                        |
| 3  |                                                                                                                            |                                                                                                                                                                                                                     |                       |                        |                        |
| 4  |                                                                                                                            |                                                                                                                                                                                                                     |                       |                        |                        |
| 5  | 1                                                                                                                          | [Polymorphism studies of angiotensin converting enzyme gene in chronic glomerulonephritis].                                                                                                                         | Kutyryna IM et al.    | 10420452               | Not English or Spanish |
| 6  |                                                                                                                            |                                                                                                                                                                                                                     |                       |                        |                        |
| 7  |                                                                                                                            |                                                                                                                                                                                                                     |                       |                        |                        |
| 8  |                                                                                                                            |                                                                                                                                                                                                                     |                       |                        |                        |
| 9  | 1                                                                                                                          | [Relationship between serum angiotensin I-converting enzyme activity and diabetic nephropathy in patients with type II diabetes].                                                                                   | Liao L et al.         | 12016801               | Not English or Spanish |
| 10 |                                                                                                                            |                                                                                                                                                                                                                     |                       |                        |                        |
| 11 |                                                                                                                            |                                                                                                                                                                                                                     |                       |                        |                        |
| 12 | 1                                                                                                                          | [Study on candidate genes of benazepril related cough in Chinese hypertensives].                                                                                                                                    | Lu J et al.           | 12848919               | Not English or Spanish |
| 13 |                                                                                                                            |                                                                                                                                                                                                                     |                       |                        |                        |
| 14 | 1                                                                                                                          | [Association of alpha-adducin and angiotensin converting enzyme gene polymorphisms with salt-sensitive hypertension and early renal injury].                                                                        | Lu LH et al.          | 18393230               | Not English or Spanish |
| 15 |                                                                                                                            |                                                                                                                                                                                                                     |                       |                        |                        |
| 16 |                                                                                                                            |                                                                                                                                                                                                                     |                       |                        |                        |
| 17 |                                                                                                                            |                                                                                                                                                                                                                     |                       |                        |                        |
| 18 | 1                                                                                                                          | [Association between insertion-deletion polymorphism of the angiotensin-converting enzyme gene and development of angiopathies in patients with non-insulin dependent diabetes mellitus from the Chuvash Republic]. | Miloserdova OV et al. | 11234416               | Not English or Spanish |
| 19 |                                                                                                                            |                                                                                                                                                                                                                     |                       |                        |                        |
| 20 |                                                                                                                            |                                                                                                                                                                                                                     |                       |                        |                        |
| 21 | 1                                                                                                                          | [Relationship between I/D polymorphism of angiotensin I converting enzyme gene and microvascular complications in type 2 diabetic patients].                                                                        | Moleda P et al.       | 17941464               | Not English or Spanish |
| 22 |                                                                                                                            |                                                                                                                                                                                                                     |                       |                        |                        |
| 23 |                                                                                                                            |                                                                                                                                                                                                                     |                       |                        |                        |
| 24 | 1                                                                                                                          | [A study on angiotensin-I converting enzyme polymorphism in CAPD patients].                                                                                                                                         | Nishina M             | 9014479                | Not English or Spanish |
| 25 |                                                                                                                            |                                                                                                                                                                                                                     |                       |                        |                        |
| 26 | 1                                                                                                                          | [Arterial hypertension in glomerulonephritis].                                                                                                                                                                      | Oko A et al.          | 14974362               | Not English or Spanish |
| 27 |                                                                                                                            |                                                                                                                                                                                                                     |                       |                        |                        |
| 28 |                                                                                                                            |                                                                                                                                                                                                                     |                       |                        |                        |
| 29 |                                                                                                                            |                                                                                                                                                                                                                     |                       |                        |                        |
| 30 | 1                                                                                                                          | [Association between angiotensin-converting enzyme 2 gene polymorphisms and childhood primary nephrotic syndrome].                                                                                                  | Qiu MY et al.         | 25815490               | Not English or Spanish |
| 31 |                                                                                                                            |                                                                                                                                                                                                                     |                       |                        |                        |
| 32 |                                                                                                                            |                                                                                                                                                                                                                     |                       |                        |                        |
| 33 | 1                                                                                                                          | [Association between ACE gene polymorphism and therapeutic responsiveness of ACEI in diabetic nephropathy].                                                                                                         | Wang L et al.         | 10923445               | Not English or Spanish |
| 34 |                                                                                                                            |                                                                                                                                                                                                                     |                       |                        |                        |
| 35 |                                                                                                                            |                                                                                                                                                                                                                     |                       |                        |                        |
| 36 | 1                                                                                                                          | [Relationship between angiotensin 1 converting enzyme gene polymorphism and diabetic nephropathy].                                                                                                                  | Wu S et al.           | 9596955                | Not English or Spanish |
| 37 |                                                                                                                            |                                                                                                                                                                                                                     |                       |                        |                        |
| 38 |                                                                                                                            |                                                                                                                                                                                                                     |                       |                        |                        |
| 39 |                                                                                                                            |                                                                                                                                                                                                                     |                       |                        |                        |
| 40 |                                                                                                                            |                                                                                                                                                                                                                     |                       |                        |                        |
| 41 |                                                                                                                            |                                                                                                                                                                                                                     |                       |                        |                        |
| 42 |                                                                                                                            |                                                                                                                                                                                                                     |                       |                        |                        |
| 43 |                                                                                                                            |                                                                                                                                                                                                                     |                       |                        |                        |
| 44 |                                                                                                                            |                                                                                                                                                                                                                     |                       |                        |                        |
| 45 |                                                                                                                            |                                                                                                                                                                                                                     |                       |                        |                        |
| 46 |                                                                                                                            |                                                                                                                                                                                                                     |                       |                        |                        |

|    |                                                                                                                                                                                    |                      |          |                        |
|----|------------------------------------------------------------------------------------------------------------------------------------------------------------------------------------|----------------------|----------|------------------------|
| 1  | [Correlative study between angiotensin-converting enzyme gene polymorphism and hepatorenal syndrome].                                                                              | Wu XX et al.         | 15698501 | Not English or Spanish |
| 2  |                                                                                                                                                                                    |                      |          |                        |
| 3  |                                                                                                                                                                                    |                      |          |                        |
| 4  | 1 DD genotype of ACE gene in boys: may it be a risk factor for minimal change nephrotic syndrome?                                                                                  | Alasehirli B et al.  | 22017506 | Paediatric individuals |
| 5  |                                                                                                                                                                                    |                      |          |                        |
| 6  | 1 Angiotensin-converting enzyme gene insertion/deletion polymorphism and renal damage in childhood uropathies.                                                                     | al-Eisa A et al.     | 10986863 | Paediatric individuals |
| 7  |                                                                                                                                                                                    |                      |          |                        |
| 8  | 1 Angiotensin converting enzyme gene insertion/deletion polymorphism in idiopathic nephrotic syndrome in Kuwaiti Arab children.                                                    | Al-Eisa A et al.     | 11487079 | Paediatric individuals |
| 9  |                                                                                                                                                                                    |                      |          |                        |
| 10 | 1 Polymorphisms in angiotensin-converting enzyme gene and severity of renal disease in Henoch-Schoenlein patients. Italian Group of Renal Immunopathology.                         | Amoroso A et al.     | 9870486  | Paediatric individuals |
| 11 |                                                                                                                                                                                    |                      |          |                        |
| 12 | 1 Angiotensin converting enzyme gene polymorphism in Asian Indian children with congenital uropathies.                                                                             | Bajpai M et al.      | 14713838 | Paediatric individuals |
| 13 |                                                                                                                                                                                    |                      |          |                        |
| 14 | 1 Late effects on renal glomerular and tubular function in childhood cancer survivors.                                                                                             | Bardi E et al.       | 15390293 | Paediatric individuals |
| 15 |                                                                                                                                                                                    |                      |          |                        |
| 16 | 1 Angiotensin-converting enzyme genotype is not a significant genetic risk factor for idiopathic nephrotic syndrome in Croatian children.                                          | Batinc D et al.      | 25997642 | Paediatric individuals |
| 17 |                                                                                                                                                                                    |                      |          |                        |
| 18 | 1 HPSE2 mutations in urofacial syndrome, non-neurogenic neurogenic bladder and lower urinary tract dysfunction.                                                                    | Bulum B et al.       | 25924634 | Paediatric individuals |
| 19 |                                                                                                                                                                                    |                      |          |                        |
| 20 | 1 ACE gene polymorphism in Turkish children with nephrotic syndrome.                                                                                                               | Celik US et al.      | 16825089 | Paediatric individuals |
| 21 |                                                                                                                                                                                    |                      |          |                        |
| 22 | 1 Glycosphingolipid levels in an unusual neurovisceral storage disease characterized by lactosylceramide galactosyl hydrolase deficiency: lactosylceramidosis.                     | Dawson G             | 5016302  | Paediatric individuals |
| 23 |                                                                                                                                                                                    |                      |          |                        |
| 24 | 1 Association of ACE and MDR1 Gene Polymorphisms with Steroid Resistance in Children with Idiopathic Nephrotic Syndrome.                                                           | Dhandapani MC et al. | 26154535 | Paediatric individuals |
| 25 |                                                                                                                                                                                    |                      |          |                        |
| 26 | 1 Polymorphisms of the angiotensin converting enzyme and angiotensin II type 1 receptor genes and renal scarring in non-uropathic children with recurrent urinary tract infection. | Ece A et al.         | 16109085 | Paediatric individuals |
| 27 |                                                                                                                                                                                    |                      |          |                        |
| 28 |                                                                                                                                                                                    |                      |          |                        |
| 29 |                                                                                                                                                                                    |                      |          |                        |
| 30 |                                                                                                                                                                                    |                      |          |                        |
| 31 |                                                                                                                                                                                    |                      |          |                        |
| 32 |                                                                                                                                                                                    |                      |          |                        |
| 33 |                                                                                                                                                                                    |                      |          |                        |
| 34 |                                                                                                                                                                                    |                      |          |                        |
| 35 |                                                                                                                                                                                    |                      |          |                        |
| 36 |                                                                                                                                                                                    |                      |          |                        |
| 37 |                                                                                                                                                                                    |                      |          |                        |
| 38 |                                                                                                                                                                                    |                      |          |                        |
| 39 |                                                                                                                                                                                    |                      |          |                        |
| 40 |                                                                                                                                                                                    |                      |          |                        |
| 41 |                                                                                                                                                                                    |                      |          |                        |
| 42 |                                                                                                                                                                                    |                      |          |                        |
| 43 |                                                                                                                                                                                    |                      |          |                        |
| 44 |                                                                                                                                                                                    |                      |          |                        |
| 45 |                                                                                                                                                                                    |                      |          |                        |
| 46 |                                                                                                                                                                                    |                      |          |                        |

|    |   |                                                                                                                                                                            |                       |          |                        |
|----|---|----------------------------------------------------------------------------------------------------------------------------------------------------------------------------|-----------------------|----------|------------------------|
| 1  | 1 | Is ACE gene polymorphism a risk factor for renal scarring with low-grade reflux?                                                                                           | Erdogan H et al.      | 15138870 | Paediatric individuals |
| 2  | 1 | ACE gene polymorphism in Egyptian children with idiopathic nephrotic syndrome.                                                                                             | Fahmy ME et al.       | 18792483 | Paediatric individuals |
| 3  | 1 | Genetic polymorphisms of the renin-angiotensin system and the outcome of focal segmental glomerulosclerosis in children.                                                   | Frishberg Y et al.    | 9853248  | Paediatric individuals |
| 4  | 1 | Angiotensinogen gene T235 variant: a marker for the development of persistent microalbuminuria in children and adolescents with type 1 diabetes mellitus                   | Gallego PH et al.     | 18413222 | Paediatric individuals |
| 5  | 1 | Implication of genetic variations in congenital obstructive nephropathy.                                                                                                   | Hahn H et al.         | 16133060 | Paediatric individuals |
| 6  | 1 | Angiotensin-converting enzyme insertion/deletion gene polymorphism in Egyptian children with systemic lupus erythematosus: a possible relation to proliferative nephritis. | Hammad A et al.       | 27956582 | Paediatric individuals |
| 7  | 1 | ACE gene polymorphism and renal scarring in primary vesicoureteric reflux.                                                                                                 | Haszon I et al.       | 12478352 | Paediatric individuals |
| 8  | 1 | ACE I/D gene polymorphism predicts renal damage in congenital uropathies.                                                                                                  | Hohenfellner K et al. | 10452281 | Paediatric individuals |
| 9  | 1 | Impact of ACE I/D gene polymorphism on congenital renal malformations.                                                                                                     | Hohenfellner K et al. | 11354781 | Paediatric individuals |
| 10 | 1 | Significance of ACE genotypes and medical treatments in childhood focal glomerulosclerosis.                                                                                | Hori C et al.         | 11474225 | Paediatric individuals |
| 11 | 1 | Impact of common functional polymorphisms in renin angiotensin system genes on the risk of renal parenchymal scarring following childhood urinary tract infection.         | Hussein A et al.      | 25939993 | Paediatric individuals |
| 12 | 1 | Gene polymorphisms of adducin GLY460TRP, ACE I/D, AND AGT M235T in pediatric hypertension patients.                                                                        | Kaplan I et al.       | 25262176 | Paediatric individuals |
| 13 | 1 | ACE serum level and I/D gene polymorphism in children with obstructive uropathies and other congenital anomalies of the kidney and urinary tract.                          | Kostadinova ES et al. | 27206329 | Paediatric individuals |

|    |                                                                                                                                                               |                       |          |                        |
|----|---------------------------------------------------------------------------------------------------------------------------------------------------------------|-----------------------|----------|------------------------|
| 1  | ACE and AT1 receptor gene polymorphisms and renal scarring in urinary bladder dysfunction                                                                     | Kostic M et al.       | 15179569 | Paediatric individuals |
| 2  |                                                                                                                                                               |                       |          |                        |
| 3  |                                                                                                                                                               |                       |          |                        |
| 4  |                                                                                                                                                               |                       |          |                        |
| 5  |                                                                                                                                                               |                       |          |                        |
| 6  | 1 Association of angiotensin converting enzyme and angiotensin type 2 receptor gene polymorphisms with renal damage in posterior urethral valves.             | Laksmi NK et al.      | 20149750 | Paediatric individuals |
| 7  |                                                                                                                                                               |                       |          |                        |
| 8  |                                                                                                                                                               |                       |          |                        |
| 9  |                                                                                                                                                               |                       |          |                        |
| 10 | 1 Renin-angiotensin system polymorphisms in Taiwanese primary vesicoureteral reflux.                                                                          | Liu KP et al.         | 15045574 | Paediatric individuals |
| 11 |                                                                                                                                                               |                       |          |                        |
| 12 | 1 Polymorphisms of renin-angiotensin system genes in childhood IgA nephropathy.                                                                               | Maruyama K et al.     | 11354780 | Paediatric individuals |
| 13 |                                                                                                                                                               |                       |          |                        |
| 14 |                                                                                                                                                               |                       |          |                        |
| 15 | 1 Angiotensin-Converting Enzyme Gene Polymorphism in Children with Idiopathic Nephrotic Syndrome, Effect on Biopsy Findings.                                  | Monajemzadeh M et al. | 28481137 | Paediatric individuals |
| 16 |                                                                                                                                                               |                       |          |                        |
| 17 | 1 ACE I/D gene polymorphism in primary FSGS and steroid-sensitive nephrotic syndrome.                                                                         | Oktem F et al.        | 14986085 | Paediatric individuals |
| 18 |                                                                                                                                                               |                       |          |                        |
| 19 | 1 Implications of certain genetic polymorphisms in scarring in vesicoureteric reflux: importance of ACE polymorphism.                                         | Ozen S et al.         | 10401028 | Paediatric individuals |
| 20 |                                                                                                                                                               |                       |          |                        |
| 21 |                                                                                                                                                               |                       |          |                        |
| 22 | 1 Renin-angiotensin system gene polymorphisms: association with susceptibility to Henoch-Schonlein purpura and renal involvement                              | Ozkaya O et al.       | 16521052 | Paediatric individuals |
| 23 |                                                                                                                                                               |                       |          |                        |
| 24 | 1 Renin-angiotensin gene polymorphism in children with uremia and essential hypertension.                                                                     | Papp F et al.         | 12579405 | Paediatric individuals |
| 25 |                                                                                                                                                               |                       |          |                        |
| 26 |                                                                                                                                                               |                       |          |                        |
| 27 | 1 Renin-angiotensin system polymorphisms and renal scarring.                                                                                                  | Pardo R et al.        | 12579398 | Paediatric individuals |
| 28 |                                                                                                                                                               |                       |          |                        |
| 29 |                                                                                                                                                               |                       |          |                        |
| 30 | 1 Angiotensin converting enzyme gene polymorphism in Indian children with steroid sensitive nephrotic syndrome.                                               | Patil SJ et al.       | 16272677 | Paediatric individuals |
| 31 |                                                                                                                                                               |                       |          |                        |
| 32 |                                                                                                                                                               |                       |          |                        |
| 33 | 1 Angiotensin I-converting enzyme-gene-polymorphism: Relationship to albumin excretion and blood pressure in pediatric patients with type-I-diabetes mellitus | Pavlovic M et al.     | 9354852  | Paediatric individuals |
| 34 |                                                                                                                                                               |                       |          |                        |
| 35 |                                                                                                                                                               |                       |          |                        |
| 36 | 1 Angiotensin I converting enzyme and angiotensinogen gene polymorphisms related to 24-h blood pressure in paediatric type I diabetes mellitus                | Pavlovic M et al.     | 9950302  | Paediatric individuals |
| 37 |                                                                                                                                                               |                       |          |                        |
| 38 |                                                                                                                                                               |                       |          |                        |
| 39 |                                                                                                                                                               |                       |          |                        |
| 40 |                                                                                                                                                               |                       |          |                        |
| 41 |                                                                                                                                                               |                       |          |                        |
| 42 |                                                                                                                                                               |                       |          |                        |
| 43 |                                                                                                                                                               |                       |          |                        |
| 44 |                                                                                                                                                               |                       |          |                        |
| 45 |                                                                                                                                                               |                       |          |                        |
| 46 |                                                                                                                                                               |                       |          |                        |

|    |   |                                                                                                                                                                      |                     |          |                        |
|----|---|----------------------------------------------------------------------------------------------------------------------------------------------------------------------|---------------------|----------|------------------------|
| 1  | 1 | Low renin-angiotensin system activity gene polymorphism and dysplasia associated with posterior urethral valves.                                                     | Peruzzi L et al.    | 16006956 | Paediatric individuals |
| 2  | 1 | Modification of epigenetic patterns in low birth weight children: importance of hypomethylation of the ACE gene promoter.                                            | Rangel M et al.     | 25170764 | Paediatric individuals |
| 3  | 1 | Angiotensin-converting enzyme and angiotensin type 2 receptor gene genotype distributions in Italian children with congenital uropathies                             | Rigoli L et al.     | 15470205 | Paediatric individuals |
| 4  | 1 | Effect of angiotensin-converting enzyme gene insertion/deletion polymorphism on steroid resistance in Egyptian children with idiopathic nephrotic syndrome.          | Saber-Ayad M et al. | 20418353 | Paediatric individuals |
| 5  | 1 | ACE gene polymorphism in children with nephrotic syndrome in the Indonesian population.                                                                              | Sasongko TH et al.  | 16421456 | Paediatric individuals |
| 6  | 1 | Polymorphisms of the TNF-alpha and ACE genes, and renal scarring in infants with urinary tract infection.                                                            | Savvidou A et al.   | 20022049 | Paediatric individuals |
| 7  | 1 | ACE gene insertion/deletion polymorphism and renal scarring in children with urinary tract infections.                                                               | Sekerli E et al.    | 19603195 | Paediatric individuals |
| 8  | 1 | ACE gene insertion/deletion polymorphism in childhood idiopathic nephrotic syndrome.                                                                                 | Serdaroglu E et al. | 16208534 | Paediatric individuals |
| 9  | 1 | Association of the ACE-II genotype with the risk of nephrotic syndrome in Pakistani children.                                                                        | Shahid S et al.     | 22033511 | Paediatric individuals |
| 10 | 1 | ACE gene polymorphism in childhood IgA nephropathy: association with clinicopathologic findings.                                                                     | Tanaka R et al.     | 9590186  | Paediatric individuals |
| 11 | 1 | Role of platelet-activating factor acetylhydrolase gene mutation in Japanese childhood IgA nephropathy.                                                              | Tanaka R et al.     | 10430976 | Paediatric individuals |
| 12 | 1 | Angiotensin-converting enzyme gene polymorphism in children with idiopathic nephrotic syndrome.                                                                      | Tsai IJ et al.      | 16645262 | Paediatric individuals |
| 13 | 1 | Angiotensin-converting enzyme gene insertion/deletion polymorphism in children with Henoch-Schonlein purpura nephritis.                                              | Zhou J et al.       | 15315169 | Paediatric individuals |
| 14 | 1 | Estimation of the relationship between the polymorphisms of selected genes: ACE, AGTR1, TGF $\beta$ 1 and GNB3 with the occurrence of primary vesicoureteral reflux. | Zyczkowski M et al. | 27988909 | Paediatric individuals |

|    |                                                                                                                         |                                                                                                                                                                                                                                                              |                        |                           |                           |
|----|-------------------------------------------------------------------------------------------------------------------------|--------------------------------------------------------------------------------------------------------------------------------------------------------------------------------------------------------------------------------------------------------------|------------------------|---------------------------|---------------------------|
| 1  | Long-term renoprotective effects of losartan in diabetic nephropathy: interaction with ACE insertion/deletion genotype? | Andersen S et al.                                                                                                                                                                                                                                            | 12716812               | Pharmaceutical drug focus |                           |
| 2  |                                                                                                                         |                                                                                                                                                                                                                                                              |                        |                           |                           |
| 3  |                                                                                                                         |                                                                                                                                                                                                                                                              |                        |                           |                           |
| 4  |                                                                                                                         |                                                                                                                                                                                                                                                              |                        |                           |                           |
| 5  | 1                                                                                                                       | High serum enalaprilat in chronic renal failure                                                                                                                                                                                                              | Elung-Jensen T et al.  | 11881130                  | Pharmaceutical drug focus |
| 6  |                                                                                                                         |                                                                                                                                                                                                                                                              |                        |                           |                           |
| 7  |                                                                                                                         |                                                                                                                                                                                                                                                              |                        |                           |                           |
| 8  |                                                                                                                         |                                                                                                                                                                                                                                                              |                        |                           |                           |
| 9  | 1                                                                                                                       | Randomized placebo-controlled trial of perindopril in normotensive, normoalbuminuric patients with type 1 diabetes mellitus.                                                                                                                                 | Kvetny J et al.        | 11181984                  | Pharmaceutical drug focus |
| 10 |                                                                                                                         |                                                                                                                                                                                                                                                              |                        |                           |                           |
| 11 |                                                                                                                         |                                                                                                                                                                                                                                                              |                        |                           |                           |
| 12 |                                                                                                                         |                                                                                                                                                                                                                                                              |                        |                           |                           |
| 13 | 1                                                                                                                       | The influence of the ACE ( I/D) polymorphism on systemic and renal vascular responses to angiotensins in normotensive, normoalbuminuric Type 1 diabetes mellitus.                                                                                            | Luik PT et al.         | 12856080                  | Pharmaceutical drug focus |
| 14 |                                                                                                                         |                                                                                                                                                                                                                                                              |                        |                           |                           |
| 15 |                                                                                                                         |                                                                                                                                                                                                                                                              |                        |                           |                           |
| 16 |                                                                                                                         |                                                                                                                                                                                                                                                              |                        |                           |                           |
| 17 | 1                                                                                                                       | Renin-angiotensin system polymorphisms and hemoglobin level in renal allografts: a comparative study between losartan and enalapril.                                                                                                                         | Noroozianaval M et al. | 17524880                  | Pharmaceutical drug focus |
| 18 |                                                                                                                         |                                                                                                                                                                                                                                                              |                        |                           |                           |
| 19 |                                                                                                                         |                                                                                                                                                                                                                                                              |                        |                           |                           |
| 20 | 1                                                                                                                       | ACE gene polymorphism and losartan treatment in type 2 diabetic patients with nephropathy                                                                                                                                                                    | Parving HH et al.      | 18199798                  | Pharmaceutical drug focus |
| 21 |                                                                                                                         |                                                                                                                                                                                                                                                              |                        |                           |                           |
| 22 |                                                                                                                         |                                                                                                                                                                                                                                                              |                        |                           |                           |
| 23 | 1                                                                                                                       | Effect of angiotensin-converting enzyme (ACE) gene polymorphism on progression of renal disease and the influence of ACE inhibition in IDDM patients: findings from the EUCLID Randomized Controlled Trial. EURODIAB Controlled Trial of Lisinopril in IDDM. | Penno G et al.         | 9726242                   | Pharmaceutical drug focus |
| 24 |                                                                                                                         |                                                                                                                                                                                                                                                              |                        |                           |                           |
| 25 |                                                                                                                         |                                                                                                                                                                                                                                                              |                        |                           |                           |
| 26 |                                                                                                                         |                                                                                                                                                                                                                                                              |                        |                           |                           |
| 27 |                                                                                                                         |                                                                                                                                                                                                                                                              |                        |                           |                           |
| 28 | 1                                                                                                                       | Enalapril and losartan affect lipid peroxidation in renal transplant recipients with renin-angiotensin system polymorphisms.                                                                                                                                 | Rashtchizadeh N et al. | 17222813                  | Pharmaceutical drug focus |
| 29 |                                                                                                                         |                                                                                                                                                                                                                                                              |                        |                           |                           |
| 30 |                                                                                                                         |                                                                                                                                                                                                                                                              |                        |                           |                           |
| 31 | 1                                                                                                                       | Chronic proteinuric nephropathies. II. Outcomes and response to treatment in a prospective cohort of 352 patients: differences between women and men in relation to the ACE gene polymorphism. Gruppo Italiano di Studi Epidemiologici in Nefrologia (Gisen) | Ruggenenti P et al.    | 10616844                  | Pharmaceutical drug focus |
| 32 |                                                                                                                         |                                                                                                                                                                                                                                                              |                        |                           |                           |
| 33 |                                                                                                                         |                                                                                                                                                                                                                                                              |                        |                           |                           |
| 34 |                                                                                                                         |                                                                                                                                                                                                                                                              |                        |                           |                           |
| 35 |                                                                                                                         |                                                                                                                                                                                                                                                              |                        |                           |                           |
| 36 |                                                                                                                         |                                                                                                                                                                                                                                                              |                        |                           |                           |
| 37 | 2                                                                                                                       | The DD genotype of the ACE gene polymorphism is associated with diabetic nephropathy in the type-1 diabetics.                                                                                                                                                | Azar ST et al.         | 11428725                  | Incorrect patient group   |
| 38 |                                                                                                                         |                                                                                                                                                                                                                                                              |                        |                           |                           |
| 39 |                                                                                                                         |                                                                                                                                                                                                                                                              |                        |                           |                           |
| 40 |                                                                                                                         |                                                                                                                                                                                                                                                              |                        |                           |                           |
| 41 |                                                                                                                         |                                                                                                                                                                                                                                                              |                        |                           |                           |
| 42 |                                                                                                                         |                                                                                                                                                                                                                                                              |                        |                           |                           |
| 43 |                                                                                                                         |                                                                                                                                                                                                                                                              |                        |                           |                           |
| 44 |                                                                                                                         |                                                                                                                                                                                                                                                              |                        |                           |                           |
| 45 |                                                                                                                         |                                                                                                                                                                                                                                                              |                        |                           |                           |
| 46 |                                                                                                                         |                                                                                                                                                                                                                                                              |                        |                           |                           |

|   |                                                                                                                                                                                                                              |                   |          |                         |
|---|------------------------------------------------------------------------------------------------------------------------------------------------------------------------------------------------------------------------------|-------------------|----------|-------------------------|
| 2 | Genetic variation at the ACE gene is associated with persistent microalbuminuria and severe nephropathy in type 1 diabetes: the DCCT/EDIC Genetics Study.                                                                    | Boright AP et al. | 15793268 | Incorrect patient group |
| 2 | ACE, PAI-1, decorin and Werner helicase genes are not associated with the development of renal disease in European patients with type 1 diabetes.                                                                            | De Cosmo S et al. | 10495473 | Incorrect patient group |
| 2 | Genetic Predisposition To Diabetic Nephropathy - Evidence For A Role Of The Angiotensin I-Converting Enzyme Gene                                                                                                             | Doria A et al.    | 7909524  | Incorrect patient group |
| 2 | Polymorphism of angiotensin converting enzyme, angiotensinogen, and angiotensin II type 1 receptor genes and end-stage renal failure in IgA nephropathy: IGARAS - A study of 274 men                                         | Frimat L et al.   | 11053482 | Incorrect patient group |
| 2 | Polymorphism of the angiotensin I-converting enzyme gene in diabetic nephropathy in type II diabetic patients with proliferative retinopathy                                                                                 | Hanyu O et al.    | 9509566  | Incorrect patient group |
| 2 | The angiotensin I-converting enzyme (ACE) locus is strongly associated with age and duration of diabetes in patients with type I diabetes                                                                                    | Hibberd ML et al. | 9025006  | Incorrect patient group |
| 2 | Hypertensive nephropathy and the gene for angiotensin-converting enzyme.                                                                                                                                                     | Kario K et al.    | 9081678  | Incorrect patient group |
| 2 | Effect of ACE gene on diabetic nephropathy in NIDDM patients with insulin resistance.                                                                                                                                        | Kuramoto N et al. | 10023638 | Incorrect patient group |
| 2 | Relationships between angiotensin I converting enzyme gene polymorphism and renal complications in Korean IDDM patients.                                                                                                     | Oh TG et al.      | 8854649  | Incorrect patient group |
| 2 | The frequency of factor V Leiden mutation, ACE gene polymorphism, serum ACE activity and response to ACE inhibitor and angiotensin II receptor antagonist drugs in Iranians type II diabetic patients with microalbuminuria. | Rahimi Z et al.   | 20853144 | Incorrect patient group |
| 2 | Interaction of MTHFR 1298C with ACE D allele augments the risk of diabetic nephropathy in Western Iran.                                                                                                                      | Rahimi Z et al.   | 21942443 | Incorrect patient group |

|   |                                                                                                                                                                                                                                                                                                                 |                      |          |                         |
|---|-----------------------------------------------------------------------------------------------------------------------------------------------------------------------------------------------------------------------------------------------------------------------------------------------------------------|----------------------|----------|-------------------------|
| 2 | The ACE insertion/deletion polymorphism has no influence on progression of renal function loss in autosomal dominant polycystic kidney disease.                                                                                                                                                                 | van Dijk MA et al.   | 10831637 | Incorrect patient group |
| 2 | Genetic polymorphisms of renin-angiotensin system and progression of interstitial nephritis.                                                                                                                                                                                                                    | Buraczynska M et al. | 12898858 | No data                 |
| 2 | Frequency of angiotensin-converting enzyme gene polymorphism in Turkish type 2 diabetic patients.                                                                                                                                                                                                               | Degirmenci I et al.  | 16178979 | No data                 |
| 2 | Association of the DD genotype and development of Japanese type 2 diabetic nephropathy.                                                                                                                                                                                                                         | Gohda T et al.       | 11770799 | No data                 |
| 2 | Angiotensin I converting enzyme and angiotensinogen gene polymorphisms in non-insulin-dependent diabetes mellitus. Lack of relationship with diabetic nephropathy and retinopathy in a Caucasian Mediterranean population                                                                                       | Gutierrez C et al.   | 9258285  | No data                 |
| 2 | Association between angiotensin-converting enzyme gene polymorphisms and diabetic nephropathy: case-control, haplotype, and family-based study in three European populations.                                                                                                                                   | Hadjadj S et al.     | 17376814 | No data                 |
| 2 | Prognostic value of the insertion/deletion polymorphism of the ACE gene in type 2 diabetic subjects: results from the Non-insulin-dependent Diabetes, Hypertension, Microalbuminuria or Proteinuria, Cardiovascular Events, and Ramipril (DIABHYCAR), Diabete de type 2, Nephropathie et Genetique (DIAB2NEP... | Hadjadj S et al.     | 18523145 | No data                 |
| 2 | Angiotensin-converting enzyme gene polymorphism in non-insulin dependent diabetes mellitus and its relationship with diabetic nephropathy.                                                                                                                                                                      | Jeffers BW et al.    | 9264004  | No data                 |
| 2 | Genetic polymorphisms of the renin-angiotensin-aldosterone system in end-stage renal disease.                                                                                                                                                                                                                   | Lovati E et al.      | 11422735 | No data                 |
| 2 | Effects of the genetic polymorphisms of the renin-angiotensin system on focal segmental glomerulosclerosis.                                                                                                                                                                                                     | Luther Y et al.      | 14610337 | No data                 |
| 2 | The renin--angiotensin system gene polymorphisms and clinicopathological correlations in IgA nephropathy.                                                                                                                                                                                                       | Ong-Ajyooth S et al. | 10511770 | No data                 |



|   |                                                                                                                                                                                                 |                    |          |                                  |
|---|-------------------------------------------------------------------------------------------------------------------------------------------------------------------------------------------------|--------------------|----------|----------------------------------|
| 2 | Combinational effect of genes for the renin-angiotensin system in conferring susceptibility to diabetic nephropathy.                                                                            | Osawa N et al.     | 17143591 | No data                          |
| 2 | Association of a uteroglobin polymorphism with rate of progression in patients with IgA nephropathy.                                                                                            | Szelestei T et al. | 10977777 | No data                          |
| 2 | Lack of synergism between long-term poor glycaemic control and three gene polymorphisms of the renin angiotensin system on risk of developing diabetic nephropathy in type I diabetic patients. | Tarnow L et al.    | 10907125 | No data                          |
| 2 | ACE gene polymorphism and disease progression of IgA nephropathy in Asians in Singapore.                                                                                                        | Lau YK et al.      | 12119485 | Overlap in patient group         |
| 2 | Polymorphism of renin-angiotensin system genes in IgA nephropathy                                                                                                                               | Woo KT et al.      | 15504143 | Overlap in patient group         |
| 3 | Angiotensin-converting enzyme (ACE) serum levels and gene polymorphism in Egyptian patients with systemic lupus erythematosus.                                                                  | Abbas D et al.     | 21976404 | < 3 populations reported per SNP |
| 3 | Association of an insertion polymorphism of angiotensin-converting enzyme gene with the activity of lupus nephritis.                                                                            | Akai Y et al.      | 10099886 | < 3 populations reported per SNP |
| 3 | Clinical impact of an angiotensin I-converting enzyme insertion/deletion and kinin B2 receptor +9/-9 polymorphisms in the prognosis of renal transplantation                                    | Amorim et al.      | 23362199 | < 3 populations reported per SNP |
| 3 | Lack of association between the angiotensin-converting enzyme gene (I/D) polymorphism and diabetic nephropathy in Tunisian type 2 diabetic patients.                                            | Arfa I et al.      | 18404607 | < 3 populations reported per SNP |
| 3 | Polymorphism of the angiotensin-converting enzyme gene in end-stage renal failure patients.                                                                                                     | Aucella F et al.   | 10773756 | < 3 populations reported per SNP |
| 3 | Polymorphism of the renin-angiotensin-aldosterone system in patients with chronic allograft dysfunction                                                                                         | Ayed K et al.      | 16635753 | < 3 populations reported per SNP |
| 3 | The presence of allele D of angiotensin-converting enzyme polymorphism is associated with diabetic nephropathy in patients with less than 10 years duration of Type 2 diabetes.                 | Canani LH et al.   | 16108844 | < 3 populations reported per SNP |

|   |                                                                                                                                                       |                          |                     |                                  |
|---|-------------------------------------------------------------------------------------------------------------------------------------------------------|--------------------------|---------------------|----------------------------------|
| 3 | Identification of specific angiotensin-converting enzyme variants and haplotypes that confer risk and protection against type 2 diabetic nephropathy. | Ezzidi I et al.          | 19787680            | < 3 populations reported per SNP |
| 3 | Genetic polymorphisms of the renin-angiotensin-aldosterone system and renal insufficiency in essential hypertension                                   | Fabris B et al.          | 15662219            | < 3 populations reported per SNP |
| 3 | Angiotensin converting enzyme gene I/D polymorphism in essential hypertension and nephroangiosclerosis.                                               | Fernández-Llama P et al. | 9607207             | < 3 populations reported per SNP |
| 3 | DNA polymorphisms in the ACE gene, serum ACE activity and the risk of nephropathy in insulin-dependent diabetes mellitus                              | Freire MBS et al.        | 9794558             | < 3 populations reported per SNP |
| 3 | Association between genetic polymorphisms of ACE & eNOS and diabetic nephropathy.                                                                     | Huo P et al.             | 25227524            | < 3 populations reported per SNP |
| 3 | Genetic Clues To The Etiology Of Balkan Endemic Nephropathy: Investigating The Role Of Ace And At1R Polymorphisms                                     | Krcunovic Z et al.       | WOS:000287217500011 | < 3 populations reported per SNP |
| 3 | Angiotensin-I Converting Enzyme Polymorphism and Diabetic Nephropathy in North India                                                                  | Kumar A et al.           | NA                  | < 3 populations reported per SNP |
| 3 | Angiotensin-converting enzyme gene polymorphism in patients with minimal-change nephrotic syndrome and focal segmental glomerulosclerosis.            | Lee DY et al.            | 9434071             | < 3 populations reported per SNP |
| 3 | Association of the genetic polymorphisms of the ACE gene and the eNOS gene with lupus nephropathy in northern Chinese population.                     | Li X et al.              | 20540812            | < 3 populations reported per SNP |
| 3 | Genes involved in the regulation of vascular homeostasis determine renal survival rate in patients with chronic glomerulonephritis                    | Litovkina O et al.       | 24727057            | < 3 populations reported per SNP |
| 3 | Contribution of genetic polymorphism in the renin-angiotensin system to the development of renal complications in insulin-dependent diabetes          | Marre M et al.           | 9120002             | < 3 populations reported per SNP |
| 3 | Influence of the alpha-adducin and ACE gene polymorphism on the progression of autosomal-dominant polycystic kidney disease.                          | Merta M et al.           | 12697976            | < 3 populations reported per SNP |

|   |                                                                                                                                                                                      |                          |                     |                                  |
|---|--------------------------------------------------------------------------------------------------------------------------------------------------------------------------------------|--------------------------|---------------------|----------------------------------|
| 3 | Genetic polymorphism of renin-angiotensin system is not associated with diabetic vascular complications in Japanese subjects with long-term insulin dependent diabetes mellitus.     | Miura J et al.           | 10499884            | < 3 populations reported per SNP |
| 3 | The effect of polymorphisms in the renin-angiotensin-aldosterone system on diabetic nephropathy risk.                                                                                | Möllsten A et al.        | 18413189            | < 3 populations reported per SNP |
| 3 | [Angiotensin-1 converting enzyme insertion/deletion gene polymorphism in a Mexican population with diabetic nephropathy].                                                            | Ortega-Pierres LE et al. | 17570179            | < 3 populations reported per SNP |
| 3 | Influence of genetic variability at the ACE locus in intron 16 on Diabetic Nephropathy in T1DM patients.                                                                             | Parchwani DN et al.      | 26214998            | < 3 populations reported per SNP |
| 3 | Renin-angiotensin system gene polymorphisms predict the progression to renal insufficiency among Asians with lupus nephritis.                                                        | Parsa A et al.           | 15789057            | < 3 populations reported per SNP |
| 3 | Chronic renal insufficiency among Asian Indians with type 2 diabetes: I. Role of RAAS gene polymorphisms                                                                             | Prasad P et al.          | WOS:000238369400001 | < 3 populations reported per SNP |
| 3 | Influence of angiotensin converting enzyme (ACE) gene rs4362 polymorphism on the progression of kidney failure in patients with autosomal dominant polycystic kidney disease (ADPKD) | Ramanathan G et al.      | 27748299            | < 3 populations reported per SNP |
| 3 | Genetic variants of ACE (Insertion/Deletion) and AGT (M268T) genes in patients with diabetes and nephropathy.                                                                        | Shaikh R et al.          | 24737640            | < 3 populations reported per SNP |
| 3 | Polymorphisms of the renin-angiotensin system genes in Brazilian patients with lupus nephropathy.                                                                                    | Sprovieri SR et al.      | 15934435            | < 3 populations reported per SNP |
| 3 | Gene polymorphisms of angiotensin-converting enzyme and angiotensin II Type 1 receptor among chronic kidney disease patients in a Chinese population                                 | Su SL et al.             | 22147663            | < 3 populations reported per SNP |
| 3 | Genetic risk factors for renal failure among north Indian ESRD patients.                                                                                                             | Tripathi G et al.        | 18242170            | < 3 populations reported per SNP |
| 3 | Association between angiotensin converting enzyme gene polymorphism and clinical features in autosomal dominant polycystic kidney disease.                                           | Uemasu J et al.          | 9180368             | < 3 populations reported per SNP |
| 3 | The DD genotype of the ACE gene polymorphism is associated with progression of diabetic nephropathy to end stage renal failure in IDDM.                                              | Vleming LJ et al.        | 10099885            | < 3 populations reported per SNP |

**Supplementary Table S3b:** Excluded studies from the ACE2 search

\*Exclusion stage relates to the stage at which the article was removed as shown in the flow diagram (Supplementary Figure S1b)

| Exclusion Stage | Title                                                                                                                                                        | Authors                  | Pubmed ID or WoS ID if Pubmed ID not available | Reason           |
|-----------------|--------------------------------------------------------------------------------------------------------------------------------------------------------------|--------------------------|------------------------------------------------|------------------|
| 1               | Angiotensin converting enzyme gene I/D polymorphism in essential hypertension and nephroangiosclerosis                                                       | Fernandez-Llama P et al. | 9607207                                        | No data for ACE2 |
| 1               | Genetic predisposition to Balkan endemic nephropathy: ability to hydroxylate debrisoquine as a host risk factor.                                             | Nikolov IG et al.        | 1820343                                        | No data for ACE2 |
| 1               | Immunoglobulin C mu gene restriction fragment length polymorphisms associated with chronic renal failure.                                                    | Demaine AG et al.        | 2985495                                        | No data for ACE2 |
| 1               | Genetic polymorphism of C3 and Bf in IgA nephropathy.                                                                                                        | Rambausek M et al.       | 3118258                                        | No data for ACE2 |
| 1               | Factor B subtypes in Japanese patients with IgA nephropathy and with idiopathic membranous nephropathy.                                                      | Nishimukai H et al.      | 3272818                                        | No data for ACE2 |
| 1               | Major-histocompatibility-complex extended haplotypes in membranoproliferative glomerulonephritis.                                                            | Welch TR et al.          | 3458025                                        | No data for ACE2 |
| 1               | A simultaneous study of the polymorphism of five proteins in the serum and the urine of nephrotic patients.                                                  | Papacostas S et al.      | 6688659                                        | No data for ACE2 |
| 1               | Identification of mutants of pyruvate kinase from red blood cells by means of trypsinization, electrophoresis, kinetic properties and immunological methods. | Jacobasch G et al.       | 7315101                                        | No data for ACE2 |
| 1               | Angiotensin-converting enzyme polymorphism and development of diabetic nephropathy in non-insulin-dependent diabetes mellitus.                               | Mizuri S et al.          | 7477652                                        | No data for ACE2 |
| 1               | No association of converting enzyme insertion/deletion polymorphism with immunoglobulin A glomerulonephritis.                                                | Schmidt S et al.         | 7485124                                        | No data for ACE2 |
| 1               | Protein loss and genetic polymorphism of apolipoprotein(a) modulate serum lipoprotein(a) in CAPD patients.                                                   | Wanner C et al.          | 7724034                                        | No data for ACE2 |

|    |                                                                                                                                                                                      |                 |         |                  |
|----|--------------------------------------------------------------------------------------------------------------------------------------------------------------------------------------|-----------------|---------|------------------|
| 1  | Lack of relationship between an insertion/deletion polymorphism in the angiotensin I-converting enzyme gene and diabetic nephropathy and proliferative retinopathy in IDDM patients. | Tarnow L et al. | 7729604 | No data for ACE2 |
| 2  |                                                                                                                                                                                      |                 |         |                  |
| 3  |                                                                                                                                                                                      |                 |         |                  |
| 4  |                                                                                                                                                                                      |                 |         |                  |
| 5  |                                                                                                                                                                                      |                 |         |                  |
| 6  | 1                                                                                                                                                                                    |                 |         |                  |
| 7  | 1                                                                                                                                                                                    |                 |         |                  |
| 8  | 1                                                                                                                                                                                    |                 |         |                  |
| 9  | 1                                                                                                                                                                                    |                 |         |                  |
| 10 | 1                                                                                                                                                                                    |                 |         |                  |
| 11 | 1                                                                                                                                                                                    |                 |         |                  |
| 12 | 1                                                                                                                                                                                    |                 |         |                  |
| 13 | 1                                                                                                                                                                                    |                 |         |                  |
| 14 | 1                                                                                                                                                                                    |                 |         |                  |
| 15 | 1                                                                                                                                                                                    |                 |         |                  |
| 16 | 1                                                                                                                                                                                    |                 |         |                  |
| 17 | 1                                                                                                                                                                                    |                 |         |                  |
| 18 | 1                                                                                                                                                                                    |                 |         |                  |
| 19 | 1                                                                                                                                                                                    |                 |         |                  |
| 20 | 1                                                                                                                                                                                    |                 |         |                  |
| 21 | 1                                                                                                                                                                                    |                 |         |                  |
| 22 | 1                                                                                                                                                                                    |                 |         |                  |
| 23 | 1                                                                                                                                                                                    |                 |         |                  |
| 24 | 1                                                                                                                                                                                    |                 |         |                  |
| 25 | 1                                                                                                                                                                                    |                 |         |                  |
| 26 | 1                                                                                                                                                                                    |                 |         |                  |
| 27 | 1                                                                                                                                                                                    |                 |         |                  |
| 28 | 1                                                                                                                                                                                    |                 |         |                  |
| 29 | 1                                                                                                                                                                                    |                 |         |                  |
| 30 | 1                                                                                                                                                                                    |                 |         |                  |
| 31 | 1                                                                                                                                                                                    |                 |         |                  |
| 32 | 1                                                                                                                                                                                    |                 |         |                  |
| 33 | 1                                                                                                                                                                                    |                 |         |                  |
| 34 | 1                                                                                                                                                                                    |                 |         |                  |
| 35 | 1                                                                                                                                                                                    |                 |         |                  |
| 36 | 1                                                                                                                                                                                    |                 |         |                  |
| 37 | 1                                                                                                                                                                                    |                 |         |                  |
| 38 | 1                                                                                                                                                                                    |                 |         |                  |
| 39 |                                                                                                                                                                                      |                 |         |                  |
| 40 |                                                                                                                                                                                      |                 |         |                  |
| 41 |                                                                                                                                                                                      |                 |         |                  |
| 42 |                                                                                                                                                                                      |                 |         |                  |
| 43 |                                                                                                                                                                                      |                 |         |                  |
| 44 |                                                                                                                                                                                      |                 |         |                  |
| 45 |                                                                                                                                                                                      |                 |         |                  |
| 46 |                                                                                                                                                                                      |                 |         |                  |

|    |                                                                                                                                            |                                                                                                                                                                                                    |                   |                  |                  |
|----|--------------------------------------------------------------------------------------------------------------------------------------------|----------------------------------------------------------------------------------------------------------------------------------------------------------------------------------------------------|-------------------|------------------|------------------|
| 1  | The angiotensin I-converting enzyme (ACE) locus is strongly associated with age and duration of diabetes in patients with type I diabetes. | Hibberd ML et al.                                                                                                                                                                                  | 9025006           | No data for ACE2 |                  |
| 2  |                                                                                                                                            |                                                                                                                                                                                                    |                   |                  |                  |
| 3  |                                                                                                                                            |                                                                                                                                                                                                    |                   |                  |                  |
| 4  |                                                                                                                                            |                                                                                                                                                                                                    |                   |                  |                  |
| 5  |                                                                                                                                            |                                                                                                                                                                                                    |                   |                  |                  |
| 6  | 1                                                                                                                                          | Hypertensive nephropathy and the gene for angiotensin-converting enzyme.                                                                                                                           | Kario K et al.    | 9081678          | No data for ACE2 |
| 7  |                                                                                                                                            |                                                                                                                                                                                                    |                   |                  |                  |
| 8  |                                                                                                                                            |                                                                                                                                                                                                    |                   |                  |                  |
| 9  |                                                                                                                                            |                                                                                                                                                                                                    |                   |                  |                  |
| 10 |                                                                                                                                            |                                                                                                                                                                                                    |                   |                  |                  |
| 11 | 1                                                                                                                                          | Evaluation of risk factors for the development of nephropathy in patients with IDDM: insertion/deletion angiotensin converting enzyme gene polymorphism, hypertension and metabolic control.       | Barnas U et al.   | 9084972          | No data for ACE2 |
| 12 |                                                                                                                                            |                                                                                                                                                                                                    |                   |                  |                  |
| 13 | 1                                                                                                                                          | Association between angiotensin converting enzyme gene polymorphism and clinical features in autosomal dominant polycystic kidney disease.                                                         | Uemasu J et al.   | 9180368          | No data for ACE2 |
| 14 |                                                                                                                                            |                                                                                                                                                                                                    |                   |                  |                  |
| 15 | 1                                                                                                                                          | Angiotensin-converting enzyme genotype and renal allograft survival.                                                                                                                               | Beige J et al.    | 9259361          | No data for ACE2 |
| 16 |                                                                                                                                            |                                                                                                                                                                                                    |                   |                  |                  |
| 17 | 1                                                                                                                                          | Association of angiotensinogen gene T235 variant with progression of immunoglobulin A nephropathy in Caucasian patients.                                                                           | Pei Y et al.      | 9259580          | No data for ACE2 |
| 18 |                                                                                                                                            |                                                                                                                                                                                                    |                   |                  |                  |
| 19 | 1                                                                                                                                          | Angiotensin-converting enzyme gene polymorphism in non-insulin dependent diabetes mellitus and its relationship with diabetic nephropathy.                                                         | Jeffers BW et al. | 9264004          | No data for ACE2 |
| 20 |                                                                                                                                            |                                                                                                                                                                                                    |                   |                  |                  |
| 21 |                                                                                                                                            |                                                                                                                                                                                                    |                   |                  |                  |
| 22 | 1                                                                                                                                          | Angiotensin I converting enzyme gene polymorphism and diabetic nephropathy in type II diabetes.                                                                                                    | Schmidt S et al.  | 9269698          | No data for ACE2 |
| 23 |                                                                                                                                            |                                                                                                                                                                                                    |                   |                  |                  |
| 24 |                                                                                                                                            |                                                                                                                                                                                                    |                   |                  |                  |
| 25 | 1                                                                                                                                          | Deletion insertion polymorphism of the angiotensin converting enzyme gene and progression of diabetic nephropathy.                                                                                 | Bjorck S et al.   | 9269704          | No data for ACE2 |
| 26 |                                                                                                                                            |                                                                                                                                                                                                    |                   |                  |                  |
| 27 |                                                                                                                                            |                                                                                                                                                                                                    |                   |                  |                  |
| 28 | 1                                                                                                                                          | Genetic regulation of the impaired immune response to hepatitis-B vaccine associated with low TCR density in end stage renal disease patients: contribution of complement C4 and factor B alleles. | Kramer J et al.   | 9334852          | No data for ACE2 |
| 29 |                                                                                                                                            |                                                                                                                                                                                                    |                   |                  |                  |
| 30 |                                                                                                                                            |                                                                                                                                                                                                    |                   |                  |                  |
| 31 | 1                                                                                                                                          | Gene-polymorphisms of angiotensin converting enzyme and endothelial nitric oxide synthase in patients with primary glomerulonephritis.                                                             | Burg M et al.     | 9352153          | No data for ACE2 |
| 32 |                                                                                                                                            |                                                                                                                                                                                                    |                   |                  |                  |
| 33 |                                                                                                                                            |                                                                                                                                                                                                    |                   |                  |                  |
| 34 | 1                                                                                                                                          | Angiotensin-converting enzyme gene polymorphism in patients with minimal-change nephrotic syndrome and focal segmental glomerulosclerosis.                                                         | Lee DY et al.     | 9434071          | No data for ACE2 |
| 35 |                                                                                                                                            |                                                                                                                                                                                                    |                   |                  |                  |
| 36 |                                                                                                                                            |                                                                                                                                                                                                    |                   |                  |                  |
| 37 | 1                                                                                                                                          | Genetic variants of microsomal metabolism and susceptibility to hydrocarbon-associated glomerulonephritis.                                                                                         | Pai P et al.      | 9474350          | No data for ACE2 |
| 38 |                                                                                                                                            |                                                                                                                                                                                                    |                   |                  |                  |
| 39 |                                                                                                                                            |                                                                                                                                                                                                    |                   |                  |                  |
| 40 |                                                                                                                                            |                                                                                                                                                                                                    |                   |                  |                  |
| 41 |                                                                                                                                            |                                                                                                                                                                                                    |                   |                  |                  |
| 42 |                                                                                                                                            |                                                                                                                                                                                                    |                   |                  |                  |
| 43 |                                                                                                                                            |                                                                                                                                                                                                    |                   |                  |                  |
| 44 |                                                                                                                                            |                                                                                                                                                                                                    |                   |                  |                  |
| 45 |                                                                                                                                            |                                                                                                                                                                                                    |                   |                  |                  |
| 46 |                                                                                                                                            |                                                                                                                                                                                                    |                   |                  |                  |

|    |                                                                                                                                               |                                                                                                                                                       |                     |                  |                  |
|----|-----------------------------------------------------------------------------------------------------------------------------------------------|-------------------------------------------------------------------------------------------------------------------------------------------------------|---------------------|------------------|------------------|
| 1  | Polymorphism of the angiotensin I-converting enzyme gene in diabetic nephropathy in type II diabetic patients with proliferative retinopathy. | Hanyu O et al.                                                                                                                                        | 9509566             | No data for ACE2 |                  |
| 2  |                                                                                                                                               |                                                                                                                                                       |                     |                  |                  |
| 3  |                                                                                                                                               |                                                                                                                                                       |                     |                  |                  |
| 4  |                                                                                                                                               |                                                                                                                                                       |                     |                  |                  |
| 5  |                                                                                                                                               |                                                                                                                                                       |                     |                  |                  |
| 6  | 1                                                                                                                                             | Identification of human plasma kallikrein gene polymorphisms and evaluation of their role in end-stage renal disease.                                 | Yu H et al.         | 9535413          | No data for ACE2 |
| 7  |                                                                                                                                               |                                                                                                                                                       |                     |                  |                  |
| 8  |                                                                                                                                               |                                                                                                                                                       |                     |                  |                  |
| 9  | 1                                                                                                                                             | Relationship of the angiotensin-converting enzyme gene polymorphism to glucose intolerance, insulin resistance, and hypertension in NIDDM.            | Huang XH et al.     | 9544854          | No data for ACE2 |
| 10 |                                                                                                                                               |                                                                                                                                                       |                     |                  |                  |
| 11 | 1                                                                                                                                             | Angiotensin-converting-enzyme insertion/deletion genotype and long-term renal allograft survival.                                                     | Beige J et al.      | 9550656          | No data for ACE2 |
| 12 |                                                                                                                                               |                                                                                                                                                       |                     |                  |                  |
| 13 | 1                                                                                                                                             | A new polymorphic restriction site in the human 11 beta-hydroxysteroid dehydrogenase type 2 gene.                                                     | Smolenicka Z et al. | 9589699          | No data for ACE2 |
| 14 |                                                                                                                                               |                                                                                                                                                       |                     |                  |                  |
| 15 | 1                                                                                                                                             | Angiotensin I converting enzyme gene polymorphisms in systemic lupus erythematosus: decreased prevalence of DD genotype in African American patients. | Tassiulas IO et al. | 9710341          | No data for ACE2 |
| 16 |                                                                                                                                               |                                                                                                                                                       |                     |                  |                  |
| 17 | 1                                                                                                                                             | Angiotensin I-converting enzyme gene polymorphisms: relationship to nephropathy in patients with non-insulin dependent diabetes mellitus.             | Grzeszczak W et al. | 9727375          | No data for ACE2 |
| 18 |                                                                                                                                               |                                                                                                                                                       |                     |                  |                  |
| 19 | 1                                                                                                                                             | The serum paraoxonase activity in patients with chronic renal failure and hyperlipidemia.                                                             | Paragh G et al.     | 9736814          | No data for ACE2 |
| 20 |                                                                                                                                               |                                                                                                                                                       |                     |                  |                  |
| 21 | 1                                                                                                                                             | Homocysteine, B vitamins, and vascular-access thrombosis in patients treated with hemodialysis.                                                       | Tamura T et al.     | 9740165          | No data for ACE2 |
| 22 |                                                                                                                                               |                                                                                                                                                       |                     |                  |                  |
| 23 | 1                                                                                                                                             | DNA polymorphisms in the ACE gene, serum ACE activity and the risk of nephropathy in insulin-dependent diabetes mellitus.                             | Freire MB et al.    | 9794558          | No data for ACE2 |
| 24 |                                                                                                                                               |                                                                                                                                                       |                     |                  |                  |
| 25 | 1                                                                                                                                             | Insertion/deletion polymorphism in intron 16 of the ACE gene and left ventricular hypertrophy in patients with end-stage renal disease.               | Osono E et al.      | 9820440          | No data for ACE2 |
| 26 |                                                                                                                                               |                                                                                                                                                       |                     |                  |                  |
| 27 | 1                                                                                                                                             | The C825T polymorphism in the human G-protein beta3 subunit gene is not associated with diabetic nephropathy in Type I diabetes mellitus.             | Fogarty DG et al.   | 9833937          | No data for ACE2 |
| 28 |                                                                                                                                               |                                                                                                                                                       |                     |                  |                  |
| 29 | 1                                                                                                                                             | Effect of ACE gene on diabetic nephropathy in NIDDM patients with insulin resistance.                                                                 | Kuramoto N et al.   | 10023638         | No data for ACE2 |
| 30 |                                                                                                                                               |                                                                                                                                                       |                     |                  |                  |
| 31 | 1                                                                                                                                             | The DD genotype of the ACE gene polymorphism is associated with progression of diabetic nephropathy to end stage renal failure in IDDM.               | Vleming LJ et al.   | 10099885         | No data for ACE2 |
| 32 |                                                                                                                                               |                                                                                                                                                       |                     |                  |                  |
| 33 |                                                                                                                                               |                                                                                                                                                       |                     |                  |                  |
| 34 |                                                                                                                                               |                                                                                                                                                       |                     |                  |                  |
| 35 |                                                                                                                                               |                                                                                                                                                       |                     |                  |                  |
| 36 |                                                                                                                                               |                                                                                                                                                       |                     |                  |                  |
| 37 |                                                                                                                                               |                                                                                                                                                       |                     |                  |                  |
| 38 |                                                                                                                                               |                                                                                                                                                       |                     |                  |                  |
| 39 |                                                                                                                                               |                                                                                                                                                       |                     |                  |                  |
| 40 |                                                                                                                                               |                                                                                                                                                       |                     |                  |                  |
| 41 |                                                                                                                                               |                                                                                                                                                       |                     |                  |                  |
| 42 |                                                                                                                                               |                                                                                                                                                       |                     |                  |                  |
| 43 |                                                                                                                                               |                                                                                                                                                       |                     |                  |                  |
| 44 |                                                                                                                                               |                                                                                                                                                       |                     |                  |                  |
| 45 |                                                                                                                                               |                                                                                                                                                       |                     |                  |                  |
| 46 |                                                                                                                                               |                                                                                                                                                       |                     |                  |                  |



|   |                                                                                                                                                                                                                                                              |                      |          |                  |
|---|--------------------------------------------------------------------------------------------------------------------------------------------------------------------------------------------------------------------------------------------------------------|----------------------|----------|------------------|
| 1 | Increased frequency of G-protein beta 3-subunit 825 T allele in dialyzed patients with type 2 diabetes.                                                                                                                                                      | Bluthner M et al.    | 10200987 | No data for ACE2 |
| 1 | Lack of association of angiotensin-converting enzyme (DD/II) and angiotensinogen M235T gene polymorphism with renal function among Chinese patients with type II diabetes.                                                                                   | Wong TY et al.       | 10352194 | No data for ACE2 |
| 1 | Angiotensin I-converting enzyme genotype significantly affects progression of IgA glomerulonephritis in an Italian population.                                                                                                                               | Stratta P et al.     | 10352195 | No data for ACE2 |
| 1 | Lipoprotein(a) and apolipoprotein(a) isoforms and proteinuria in patients with moderate renal failure.                                                                                                                                                       | Sechi LA et al.      | 10469373 | No data for ACE2 |
| 1 | ACE, PAI-1, decorin and Werner helicase genes are not associated with the development of renal disease in European patients with type 1 diabetes.                                                                                                            | De Cosmo S et al.    | 10495473 | No data for ACE2 |
| 1 | The renin-angiotensin system gene polymorphisms and clinicopathological correlations in IgA nephropathy.                                                                                                                                                     | Ong-Ajyooth S et al. | 10511770 | No data for ACE2 |
| 1 | Effect of a polymorphism of endothelial nitric oxide synthase gene in Japanese patients with IgA nephropathy.                                                                                                                                                | Morita T et al.      | 10543322 | No data for ACE2 |
| 1 | Endothelial nitric oxide synthase gene polymorphism in intron 4 affects the progression of renal failure in non-diabetic renal diseases.                                                                                                                     | Wang Y et al.        | 10570094 | No data for ACE2 |
| 1 | Risk factors for the progression of microalbuminuria in Japanese type 2 diabetic patients--a 10 year follow-up study.                                                                                                                                        | Oue T et al.         | 10580616 | No data for ACE2 |
| 1 | Chronic proteinuric nephropathies. II. Outcomes and response to treatment in a prospective cohort of 352 patients: differences between women and men in relation to the ACE gene polymorphism. Gruppo Italiano di Studi Epidemiologici in Nefrologia (Gisen) | Ruggenti P et al.    | 10616844 | No data for ACE2 |
| 1 | Risk of advanced diabetic nephropathy in type 1 diabetes is associated with endothelial nitric oxide synthase gene polymorphism.                                                                                                                             | Zanchi A et al.      | 10652017 | No data for ACE2 |
| 1 | HDL cholesterol and TaqIB cholesterol ester transfer protein gene polymorphism in renal transplant recipients.                                                                                                                                               | Radeau T et al.      | 10754410 | No data for ACE2 |



|    |                                                                                                                                                                                                   |                     |          |                  |
|----|---------------------------------------------------------------------------------------------------------------------------------------------------------------------------------------------------|---------------------|----------|------------------|
| 1  | Polymorphism of the angiotensin-converting enzyme gene in end-stage renal failure patients.                                                                                                       | Aucella F et al.    | 10773756 | No data for ACE2 |
| 2  |                                                                                                                                                                                                   |                     |          |                  |
| 3  |                                                                                                                                                                                                   |                     |          |                  |
| 4  |                                                                                                                                                                                                   |                     |          |                  |
| 5  |                                                                                                                                                                                                   |                     |          |                  |
| 6  | 1 The ACE insertion/deletion polymorphism has no influence on progression of renal function loss in autosomal dominant polycystic kidney disease.                                                 | van Dijk MA et al.  | 10831637 | No data for ACE2 |
| 7  |                                                                                                                                                                                                   |                     |          |                  |
| 8  |                                                                                                                                                                                                   |                     |          |                  |
| 9  |                                                                                                                                                                                                   |                     |          |                  |
| 10 | 1 Increased frequency of angiotensin-converting enzyme DD genotype in patients with type 2 diabetes in Taiwan.                                                                                    | Hsieh MC et al.     | 10862639 | No data for ACE2 |
| 11 |                                                                                                                                                                                                   |                     |          |                  |
| 12 | 1 Association of the nitric oxide synthase gene polymorphism with an increased risk for progression to diabetic nephropathy in type 2 diabetes.                                                   | Neugebauer S et al. | 10868974 | No data for ACE2 |
| 13 |                                                                                                                                                                                                   |                     |          |                  |
| 14 |                                                                                                                                                                                                   |                     |          |                  |
| 15 | 1 Lack of synergism between long-term poor glycaemic control and three gene polymorphisms of the renin angiotensin system on risk of developing diabetic nephropathy in type I diabetic patients. | Tarnow L et al.     | 10907125 | No data for ACE2 |
| 16 |                                                                                                                                                                                                   |                     |          |                  |
| 17 |                                                                                                                                                                                                   |                     |          |                  |
| 18 | 1 Differential expression of cyclin-dependent kinase inhibitors in human glomerular disease: role in podocyte proliferation and maturation.                                                       | Shankland SJ et al. | 10916090 | No data for ACE2 |
| 19 |                                                                                                                                                                                                   |                     |          |                  |
| 20 |                                                                                                                                                                                                   |                     |          |                  |
| 21 | 1 G-Protein beta(3) subunit C825T variant, nephropathy and hypertension in patients with type 2 (Non-insulin-dependent) diabetes mellitus.                                                        | Zychma MJ et al.    | 10970984 | No data for ACE2 |
| 22 |                                                                                                                                                                                                   |                     |          |                  |
| 23 |                                                                                                                                                                                                   |                     |          |                  |
| 24 | 1 Association of a uteroglobin polymorphism with rate of progression in patients with IgA nephropathy.                                                                                            | Szelestei T et al.  | 10977777 | No data for ACE2 |
| 25 |                                                                                                                                                                                                   |                     |          |                  |
| 26 | 1 Deregulated platelet-activating factor levels and acetylhydrolase activity in patients with idiopathic IgA nephropathy.                                                                         | Denizot Y et al.    | 10978389 | No data for ACE2 |
| 27 |                                                                                                                                                                                                   |                     |          |                  |
| 28 |                                                                                                                                                                                                   |                     |          |                  |
| 29 | 1 Structural analysis of the 11beta-hydroxysteroid dehydrogenase type 2 gene in end-stage renal disease.                                                                                          | Zaehner T et al.    | 11012876 | No data for ACE2 |
| 30 |                                                                                                                                                                                                   |                     |          |                  |
| 31 |                                                                                                                                                                                                   |                     |          |                  |
| 32 | 1 Polymorphism of angiotensin converting enzyme, angiotensinogen, and angiotensin II type 1 receptor genes and end-stage renal failure in IgA nephropathy: IGARAS--a study of 274 Men.            | Frimat L et al.     | 11053482 | No data for ACE2 |
| 33 |                                                                                                                                                                                                   |                     |          |                  |
| 34 |                                                                                                                                                                                                   |                     |          |                  |
| 35 | 1 Genetic analysis of nitric oxide and endothelin in end-stage renal disease.                                                                                                                     | Freedman BI et al.  | 11071967 | No data for ACE2 |
| 36 |                                                                                                                                                                                                   |                     |          |                  |
| 37 |                                                                                                                                                                                                   |                     |          |                  |
| 38 | 1 Angiotensinogen M235T and chymase gene CMA/B polymorphisms are not associated with nephropathy in type II diabetes.                                                                             | Zychma MJ et al.    | 11096141 | No data for ACE2 |
| 39 |                                                                                                                                                                                                   |                     |          |                  |
| 40 |                                                                                                                                                                                                   |                     |          |                  |
| 41 |                                                                                                                                                                                                   |                     |          |                  |
| 42 |                                                                                                                                                                                                   |                     |          |                  |
| 43 |                                                                                                                                                                                                   |                     |          |                  |
| 44 |                                                                                                                                                                                                   |                     |          |                  |
| 45 |                                                                                                                                                                                                   |                     |          |                  |
| 46 |                                                                                                                                                                                                   |                     |          |                  |

|   |                                                                                                                                 |                     |          |                  |
|---|---------------------------------------------------------------------------------------------------------------------------------|---------------------|----------|------------------|
| 1 | Association between a variant in the 11 beta-hydroxysteroid dehydrogenase type 2 gene and primary hypertension.                 | Melander O et al.   | 11114699 | No data for ACE2 |
| 1 | Polymorphisms of human paraoxonase 1 gene (PON1) and susceptibility to diabetic nephropathy in type I diabetes mellitus.        | Araki S et al.      | 11151764 | No data for ACE2 |
| 1 | Posttransplantation relapse of FSGS is characterized by glomerular epithelial cell transdifferentiation.                        | Bariety J et al.    | 11158216 | No data for ACE2 |
| 1 | Membranous nephropathy, hydrocarbon exposure and genetic variants of hydrocarbon detoxification.                                | Gradden CW et al.   | 11181983 | No data for ACE2 |
| 1 | Albuminuria and the renin-angiotensin system gene polymorphisms in type-2-diabetic and in normoglycemic hypertensive Chinese.   | Thomas GN et al.    | 11200871 | No data for ACE2 |
| 1 | Paraoxonase2 polymorphisms are associated with nephropathy in Type II diabetes.                                                 | Pinizzotto M et al. | 11206400 | No data for ACE2 |
| 1 | ACE gene polymorphism and long-term renal graft function.                                                                       | Viklicky O et al.   | 11239522 | No data for ACE2 |
| 1 | The C825T polymorphism in the G-protein beta3 subunit gene and diabetic complications in IDDM patients.                         | Shcherbak NS et al. | 11322658 | No data for ACE2 |
| 1 | Polymorphisms in the hANP (human atrial natriuretic peptide) gene, albuminuria, and hypertension.                               | Nannipieri M et al. | 11408388 | No data for ACE2 |
| 1 | Genetic polymorphisms of the renin-angiotensin-aldosterone system in end-stage renal disease.                                   | Lovati E et al.     | 11422735 | No data for ACE2 |
| 1 | The DD genotype of the ACE gene polymorphism is associated with diabetic nephropathy in the type-1 diabetics.                   | Azar ST et al.      | 11428725 | No data for ACE2 |
| 1 | Contribution of gene polymorphisms in the renin-angiotensin system to macroangiopathy in patients with diabetic nephropathy.    | Wong TY et al.      | 11431175 | No data for ACE2 |
| 1 | Catalase/superoxide dismutase (SOD) and catalase/paraoxonase (PON) ratios may implicate poor glycemic control.                  | Sozmen EY et al.    | 11440784 | No data for ACE2 |
| 1 | Serum paraoxonase and arylesterase activities in hemodialysis patients.                                                         | Itahara T et al.    | 11480456 | No data for ACE2 |
| 1 | Influence of Bsm1 vitamin D receptor gene polymorphism on the response to a single bolus of calcitrol in hemodialysis patients. | Marco MP et al.     | 11522087 | No data for ACE2 |

|    |   |                                                                                                                                                                  |                     |          |                  |
|----|---|------------------------------------------------------------------------------------------------------------------------------------------------------------------|---------------------|----------|------------------|
| 1  | 1 | Is there a role of angiotensin-converting enzyme gene polymorphism in the failure of arteriovenous femoral shunts for hemodialysis?                              | Isbir CS et al.     | 11525534 | No data for ACE2 |
| 2  | 1 | Endothelial nitric oxide synthase intron 4 polymorphism influences the progression of renal disease.                                                             | Asakimori Y et al.  | 11549906 | No data for ACE2 |
| 3  | 1 | Dinucleotide repeat polymorphism of matrix metalloproteinase-9 gene is associated with diabetic nephropathy.                                                     | Maeda S et al.      | 11576356 | No data for ACE2 |
| 4  | 1 | Angiotensin-converting enzyme gene polymorphism and microvascular complications in Turkish type 2 diabetic patients.                                             | Araz M et al.       | 11640993 | No data for ACE2 |
| 5  | 1 | Effect of human OGG1 1245C-->G gene polymorphism on 8-hydroxy-2'-deoxyguanosine levels of leukocyte DNA among patients undergoing chronic hemodialysis.          | Tarng DC et al.     | 11675410 | No data for ACE2 |
| 6  | 1 | Association of the DD genotype and development of Japanese type 2 diabetic nephropathy.                                                                          | Gohda T et al.      | 11770799 | No data for ACE2 |
| 7  | 1 | Different impact of deletion polymorphism of gene on the risk of renal and coronary artery disease.                                                              | Olivieri O et al.   | 11791024 | No data for ACE2 |
| 8  | 1 | Gene mutations in lymphoproliferative disorders of T and NK/T cell phenotypes developing in renal transplant patients.                                           | Hoshida Y et al.    | 11896204 | No data for ACE2 |
| 9  | 1 | Association of a functional inducible nitric oxide synthase promoter variant with complications in type 2 diabetes.                                              | Morris BJ et al.    | 11907646 | No data for ACE2 |
| 10 | 1 | Association studies between the HSD11B2 gene (encoding human 11beta-hydroxysteroid dehydrogenase type 2), type 1 diabetes mellitus and diabetic nephropathy.     | Lavery GG et al.    | 11916625 | No data for ACE2 |
| 11 | 1 | Polymorphism in ecto-nucleotide pyrophosphatase/phosphodiesterase 1 gene (ENPP1/PC-1) and early development of advanced diabetic nephropathy in type 1 diabetes. | Canani LH et al.    | 11916943 | No data for ACE2 |
| 12 | 1 | Role of the alpha-adducin genotype on renal disease progression.                                                                                                 | Nicod J et al.      | 11918733 | No data for ACE2 |
| 13 | 1 | Hypertension after renal transplantation and polymorphism of genes involved in essential hypertension: ACE, AGT, AT1 R and eNOS.                                 | Basset el-EA et al. | 11926202 | No data for ACE2 |

|    |                                                                                                                                                               |                                                                                                                                                                                                |                    |                  |                  |
|----|---------------------------------------------------------------------------------------------------------------------------------------------------------------|------------------------------------------------------------------------------------------------------------------------------------------------------------------------------------------------|--------------------|------------------|------------------|
| 1  | ACE gene insertion/deletion polymorphism associated with 1998 World Health Organization definition of metabolic syndrome in Chinese type 2 diabetic patients. | Lee YJ et al.                                                                                                                                                                                  | 12032106           | No data for ACE2 |                  |
| 2  |                                                                                                                                                               |                                                                                                                                                                                                |                    |                  |                  |
| 3  |                                                                                                                                                               |                                                                                                                                                                                                |                    |                  |                  |
| 4  |                                                                                                                                                               |                                                                                                                                                                                                |                    |                  |                  |
| 5  |                                                                                                                                                               |                                                                                                                                                                                                |                    |                  |                  |
| 6  | 1                                                                                                                                                             | Angiotensin-converting enzyme gene polymorphism and vascular manifestations in Korean patients with SLE.                                                                                       | Uhm WS et al.      | 12043886         | No data for ACE2 |
| 7  |                                                                                                                                                               |                                                                                                                                                                                                |                    |                  |                  |
| 8  |                                                                                                                                                               |                                                                                                                                                                                                |                    |                  |                  |
| 9  |                                                                                                                                                               |                                                                                                                                                                                                |                    |                  |                  |
| 10 |                                                                                                                                                               |                                                                                                                                                                                                |                    |                  |                  |
| 11 | 1                                                                                                                                                             | Parathyroid hormone gene polymorphism and secondary hyperparathyroidism in hemodialysis patients.                                                                                              | Gohda T et al.     | 12046039         | No data for ACE2 |
| 12 |                                                                                                                                                               |                                                                                                                                                                                                |                    |                  |                  |
| 13 |                                                                                                                                                               |                                                                                                                                                                                                |                    |                  |                  |
| 14 | 1                                                                                                                                                             | Endothelial nitric oxide synthase affects the progression of autosomal dominant polycystic kidney disease.                                                                                     | Reiterova J et al. | 12077489         | No data for ACE2 |
| 15 |                                                                                                                                                               |                                                                                                                                                                                                |                    |                  |                  |
| 16 | 1                                                                                                                                                             | ACE gene polymorphism and disease progression of IgA nephropathy in Asians in Singapore.                                                                                                       | Lau YK et al.      | 12119485         | No data for ACE2 |
| 17 |                                                                                                                                                               |                                                                                                                                                                                                |                    |                  |                  |
| 18 | 1                                                                                                                                                             | T(-786)-->C polymorphism of the endothelial nitric oxide synthase gene influences the progression of renal disease.                                                                            | Asakimori Y et al. | 12138283         | No data for ACE2 |
| 19 |                                                                                                                                                               |                                                                                                                                                                                                |                    |                  |                  |
| 20 | 1                                                                                                                                                             | The role of PC-1 and ACE genes in diabetic nephropathy in type 1 diabetic patients: evidence for a polygenic control of kidney disease progression.                                            | De Cosmo S et al.  | 12147786         | No data for ACE2 |
| 21 |                                                                                                                                                               |                                                                                                                                                                                                |                    |                  |                  |
| 22 |                                                                                                                                                               |                                                                                                                                                                                                |                    |                  |                  |
| 23 | 1                                                                                                                                                             | Nephropathy in type 1 diabetes: a manifestation of insulin resistance and multiple genetic susceptibilities? Further evidence from the Pittsburgh Epidemiology of Diabetes Complication Study. | Orchard TJ et al.  | 12164879         | No data for ACE2 |
| 24 |                                                                                                                                                               |                                                                                                                                                                                                |                    |                  |                  |
| 25 |                                                                                                                                                               |                                                                                                                                                                                                |                    |                  |                  |
| 26 |                                                                                                                                                               |                                                                                                                                                                                                |                    |                  |                  |
| 27 | 1                                                                                                                                                             | Influence of the endothelial nitric oxide synthase polymorphism on the progression of autosomal dominant polycystic kidney disease and IgA nephropathy.                                        | Merta M et al.     | 12212826         | No data for ACE2 |
| 28 |                                                                                                                                                               |                                                                                                                                                                                                |                    |                  |                  |
| 29 |                                                                                                                                                               |                                                                                                                                                                                                |                    |                  |                  |
| 30 | 1                                                                                                                                                             | Serum paraoxonase (PON1) concentration in patients undergoing hemodialysis.                                                                                                                    | Suehiro T et al.   | 12226554         | No data for ACE2 |
| 31 |                                                                                                                                                               |                                                                                                                                                                                                |                    |                  |                  |
| 32 |                                                                                                                                                               |                                                                                                                                                                                                |                    |                  |                  |
| 33 | 1                                                                                                                                                             | Genetic determinants of delayed graft function after kidney transplantation.                                                                                                                   | St Peter SD et al. | 12364860         | No data for ACE2 |
| 34 |                                                                                                                                                               |                                                                                                                                                                                                |                    |                  |                  |
| 35 | 1                                                                                                                                                             | Endothelial nitric oxide synthase gene polymorphism in dialysis patients.                                                                                                                      | de Prado A et al.  | 12402580         | No data for ACE2 |
| 36 |                                                                                                                                                               |                                                                                                                                                                                                |                    |                  |                  |
| 37 | 1                                                                                                                                                             | Endothelial nitric oxide synthase gene and the development of diabetic nephropathy.                                                                                                            | Shimizu T et al.   | 12413777         | No data for ACE2 |
| 38 |                                                                                                                                                               |                                                                                                                                                                                                |                    |                  |                  |
| 39 |                                                                                                                                                               |                                                                                                                                                                                                |                    |                  |                  |
| 40 |                                                                                                                                                               |                                                                                                                                                                                                |                    |                  |                  |
| 41 |                                                                                                                                                               |                                                                                                                                                                                                |                    |                  |                  |
| 42 |                                                                                                                                                               |                                                                                                                                                                                                |                    |                  |                  |
| 43 |                                                                                                                                                               |                                                                                                                                                                                                |                    |                  |                  |
| 44 |                                                                                                                                                               |                                                                                                                                                                                                |                    |                  |                  |
| 45 |                                                                                                                                                               |                                                                                                                                                                                                |                    |                  |                  |
| 46 |                                                                                                                                                               |                                                                                                                                                                                                |                    |                  |                  |

|    |   |                                                                                                                              |                      |          |                  |
|----|---|------------------------------------------------------------------------------------------------------------------------------|----------------------|----------|------------------|
| 1  | 1 | G-protein beta-3-subunit and eNOS gene polymorphism in transplant recipients with long-term renal graft function.            | Viklicky O et al.    | 12424427 | No data for ACE2 |
| 2  | 1 | Microfluidic chip-based method for genotyping microsatellites, VNTRs and insertion/deletion polymorphisms.                   | Sohni YR et al.      | 12554058 | No data for ACE2 |
| 3  | 1 | The role of ACE gene polymorphism in rapidity of progression of focal segmental glomerulosclerosis.                          | Dixit M et al.       | 12571380 | No data for ACE2 |
| 4  | 1 | The response of antioxidant genes to hyperglycemia is abnormal in patients with type 1 diabetes and diabetic nephropathy.    | Hodgkinson AD et al. | 12606529 | No data for ACE2 |
| 5  | 1 | Epidermal growth factor receptor polymorphism and autosomal dominant polycystic kidney disease.                              | Magistrone R et al.  | 12653106 | No data for ACE2 |
| 6  | 1 | Cardiac hypertrophy and remodeling in relation to ACE and angiotensinogen genes genotypes in Chinese dialysis patients.      | Wang AY et al.       | 12675870 | No data for ACE2 |
| 7  | 1 | Nitric oxide synthase gene polymorphisms and diabetic nephropathy.                                                           | Rippin JD et al.     | 12687343 | No data for ACE2 |
| 8  | 1 | Influence of the alpha-adducin and ACE gene polymorphism on the progression of autosomal-dominant polycystic kidney disease. | Merta M et al.       | 12697976 | No data for ACE2 |
| 9  | 1 | Association of ecNOS gene polymorphisms with end stage renal diseases.                                                       | Nagase S et al.      | 12701818 | No data for ACE2 |
| 10 | 1 | PAI-1 4G/5G and ACE I/D gene polymorphisms and the occurrence of myocardial infarction in patients on intermittent dialysis. | Aucella F et al.     | 12748347 | No data for ACE2 |
| 11 | 1 | Paraoxonase activity and paraoxonase 1 gene polymorphism in patients with uremia.                                            | Biasioli S et al.    | 12790379 | No data for ACE2 |
| 12 | 1 | Evaluation of genetic variation and association in the matrix metalloproteinase 9 (MMP9) gene in ESRD patients.              | Hirakawa S et al.    | 12830465 | No data for ACE2 |
| 13 | 1 | Angiotensin converting enzyme gene polymorphism and development of post-transplant erythrocytosis.                           | Yildiz A et al.      | 12832741 | No data for ACE2 |
| 14 | 1 | Identification of a common risk haplotype for diabetic nephropathy at the protein kinase C-beta1 (PRKCB1) gene locus.        | Araki S et al.       | 12874455 | No data for ACE2 |
| 15 | 1 | Genotypic and phenotypic properties of coagulase-negative staphylococci causing dialysis catheter-related sepsis.            | Spare MK et al.      | 12919757 | No data for ACE2 |

|    |                                                                                                                                   |                                                                                                                                                                                  |                      |                  |                  |
|----|-----------------------------------------------------------------------------------------------------------------------------------|----------------------------------------------------------------------------------------------------------------------------------------------------------------------------------|----------------------|------------------|------------------|
| 1  | Elevation of IgG antibodies against tissue transglutaminase as a diagnostic tool for coeliac disease in selective IgA deficiency. | Korponay-Szabo IR et al.                                                                                                                                                         | 14570724             | No data for ACE2 |                  |
| 2  |                                                                                                                                   |                                                                                                                                                                                  |                      |                  |                  |
| 3  |                                                                                                                                   |                                                                                                                                                                                  |                      |                  |                  |
| 4  |                                                                                                                                   |                                                                                                                                                                                  |                      |                  |                  |
| 5  |                                                                                                                                   |                                                                                                                                                                                  |                      |                  |                  |
| 6  | 1                                                                                                                                 | Association of the p22phox component of NAD(P)H oxidase with susceptibility to diabetic nephropathy in patients with type 1 diabetes.                                            | Hodgkinson AD et al. | 14578247         | No data for ACE2 |
| 7  |                                                                                                                                   |                                                                                                                                                                                  |                      |                  |                  |
| 8  |                                                                                                                                   |                                                                                                                                                                                  |                      |                  |                  |
| 9  | 1                                                                                                                                 | Effects of the genetic polymorphisms of the renin-angiotensin system on focal segmental glomerulosclerosis.                                                                      | Luther Y et al.      | 14610337         | No data for ACE2 |
| 10 |                                                                                                                                   |                                                                                                                                                                                  |                      |                  |                  |
| 11 | 1                                                                                                                                 | Interaction between gene polymorphisms of nitric oxide synthase and renin-angiotensin system in the progression of membranous glomerulonephritis.                                | Stratta P et al.     | 14767013         | No data for ACE2 |
| 12 |                                                                                                                                   |                                                                                                                                                                                  |                      |                  |                  |
| 13 |                                                                                                                                   |                                                                                                                                                                                  |                      |                  |                  |
| 14 | 1                                                                                                                                 | Angiotensin-converting enzyme polymorphism gene and evolution of nephropathy to end-stage renal disease.                                                                         | Ortiz MA et al.      | 15012717         | No data for ACE2 |
| 15 |                                                                                                                                   |                                                                                                                                                                                  |                      |                  |                  |
| 16 | 1                                                                                                                                 | Angiotensin-converting enzyme genotype is a predictive factor in the peak panel-reactive antibody response.                                                                      | Akcay A et al.       | 15013293         | No data for ACE2 |
| 17 |                                                                                                                                   |                                                                                                                                                                                  |                      |                  |                  |
| 18 | 1                                                                                                                                 | Quantitative polymorphism of complement receptor type 1 (CR1) in patients undergoing haemodialysis.                                                                              | Tamano M et al.      | 15069174         | No data for ACE2 |
| 19 |                                                                                                                                   |                                                                                                                                                                                  |                      |                  |                  |
| 20 | 1                                                                                                                                 | Renin-angiotensin system gene polymorphisms: its impact on IgAN and its progression to end-stage renal failure among Chinese in Singapore.                                       | Lau YK et al.        | 15153745         | No data for ACE2 |
| 21 |                                                                                                                                   |                                                                                                                                                                                  |                      |                  |                  |
| 22 | 1                                                                                                                                 | Role of alpha-adducin DNA polymorphisms in the genetic predisposition to diabetic nephropathy.                                                                                   | Conway BR et al.     | 15187197         | No data for ACE2 |
| 23 |                                                                                                                                   |                                                                                                                                                                                  |                      |                  |                  |
| 24 |                                                                                                                                   |                                                                                                                                                                                  |                      |                  |                  |
| 25 | 1                                                                                                                                 | Estrogen receptor is significantly associated with the epithelioid variants of renal angiomyolipoma: a clinicopathological and immunohistochemical study of 67 cases.            | Cho NH et al.        | 15189505         | No data for ACE2 |
| 26 |                                                                                                                                   |                                                                                                                                                                                  |                      |                  |                  |
| 27 | 1                                                                                                                                 | Paraoxonase 192 polymorphism and its relationship to serum lipids in Turkish renal transplant recipients.                                                                        | Agachan B et al.     | 15251338         | No data for ACE2 |
| 28 |                                                                                                                                   |                                                                                                                                                                                  |                      |                  |                  |
| 29 | 1                                                                                                                                 | Angiotensin converting enzyme genotype and chronic allograft nephropathy in protocol biopsies.                                                                                   | Hueso M et al.       | 15284309         | No data for ACE2 |
| 30 |                                                                                                                                   |                                                                                                                                                                                  |                      |                  |                  |
| 31 | 1                                                                                                                                 | The influence of G-protein beta3-subunit gene and endothelial nitric oxide synthase gene in exon 7 polymorphisms on progression of autosomal dominant polycystic kidney disease. | Reiterova J et al.   | 15287194         | No data for ACE2 |
| 32 |                                                                                                                                   |                                                                                                                                                                                  |                      |                  |                  |
| 33 |                                                                                                                                   |                                                                                                                                                                                  |                      |                  |                  |
| 34 |                                                                                                                                   |                                                                                                                                                                                  |                      |                  |                  |
| 35 |                                                                                                                                   |                                                                                                                                                                                  |                      |                  |                  |
| 36 |                                                                                                                                   |                                                                                                                                                                                  |                      |                  |                  |
| 37 |                                                                                                                                   |                                                                                                                                                                                  |                      |                  |                  |
| 38 |                                                                                                                                   |                                                                                                                                                                                  |                      |                  |                  |
| 39 |                                                                                                                                   |                                                                                                                                                                                  |                      |                  |                  |
| 40 |                                                                                                                                   |                                                                                                                                                                                  |                      |                  |                  |
| 41 |                                                                                                                                   |                                                                                                                                                                                  |                      |                  |                  |
| 42 |                                                                                                                                   |                                                                                                                                                                                  |                      |                  |                  |
| 43 |                                                                                                                                   |                                                                                                                                                                                  |                      |                  |                  |
| 44 |                                                                                                                                   |                                                                                                                                                                                  |                      |                  |                  |
| 45 |                                                                                                                                   |                                                                                                                                                                                  |                      |                  |                  |
| 46 |                                                                                                                                   |                                                                                                                                                                                  |                      |                  |                  |

|    |                                                                                                                                                                                           |                      |          |                  |
|----|-------------------------------------------------------------------------------------------------------------------------------------------------------------------------------------------|----------------------|----------|------------------|
| 1  | Endothelial nitric oxide synthase gene intron 4 polymorphism in patients with end-stage renal disease.                                                                                    | Buraczynska M et al. | 15299097 | No data for ACE2 |
| 2  |                                                                                                                                                                                           |                      |          |                  |
| 3  |                                                                                                                                                                                           |                      |          |                  |
| 4  |                                                                                                                                                                                           |                      |          |                  |
| 5  |                                                                                                                                                                                           |                      |          |                  |
| 6  | 1 Low prevalence of nonconservative mutations of serum and glucocorticoid-regulated kinase (SGK1) gene in hypertensive and renal patients.                                                | Trochen N et al.     | 15304560 | No data for ACE2 |
| 7  |                                                                                                                                                                                           |                      |          |                  |
| 8  |                                                                                                                                                                                           |                      |          |                  |
| 9  |                                                                                                                                                                                           |                      |          |                  |
| 10 | 1 Relations between eNOS Glu298Asp polymorphism and progression of diabetic nephropathy.                                                                                                  | Shin Shin Y et al.   | 15331206 | No data for ACE2 |
| 11 |                                                                                                                                                                                           |                      |          |                  |
| 12 |                                                                                                                                                                                           |                      |          |                  |
| 13 | 1 Angiotensin-converting enzyme (insertion/deletion) and endothelial nitric oxide synthase polymorphisms in patients with systemic lupus erythematosus.                                   | Douglas G et al.     | 15338496 | No data for ACE2 |
| 14 |                                                                                                                                                                                           |                      |          |                  |
| 15 |                                                                                                                                                                                           |                      |          |                  |
| 16 | 1 Angiotensin-I converting enzyme gene polymorphism in Turkish type 2 diabetic patients.                                                                                                  | Arzu Ergen H et al.  | 15365253 | No data for ACE2 |
| 17 |                                                                                                                                                                                           |                      |          |                  |
| 18 |                                                                                                                                                                                           |                      |          |                  |
| 19 | 1 Identification of NQO1 and GSTs genotype frequencies in Bulgarian patients with Balkan endemic nephropathy.                                                                             | Toncheva DI et al.   | 15365958 | No data for ACE2 |
| 20 |                                                                                                                                                                                           |                      |          |                  |
| 21 | 1 Balkan endemic nephropathy and genetic variants of glutathione S-transferases.                                                                                                          | Andonova IE et al.   | 15365959 | No data for ACE2 |
| 22 |                                                                                                                                                                                           |                      |          |                  |
| 23 |                                                                                                                                                                                           |                      |          |                  |
| 24 | 1 Association of the genetic polymorphisms of the renin-angiotensin system and endothelial nitric oxide synthase with chronic renal transplant dysfunction.                               | Akcay A et al.       | 15385810 | No data for ACE2 |
| 25 |                                                                                                                                                                                           |                      |          |                  |
| 26 |                                                                                                                                                                                           |                      |          |                  |
| 27 | 1 Genetic polymorphisms of cytochrome P450 among patients with Balkan endemic nephropathy (BEN).                                                                                          | Atanasova SY et al.  | 15708542 | No data for ACE2 |
| 28 |                                                                                                                                                                                           |                      |          |                  |
| 29 |                                                                                                                                                                                           |                      |          |                  |
| 30 | 1 Evidence for association of endothelial cell nitric oxide synthase gene polymorphism with earlier progression to end-stage renal disease in a cohort of Hellens from Greece and Cyprus. | Lamnissou K et al.   | 15727257 | No data for ACE2 |
| 31 |                                                                                                                                                                                           |                      |          |                  |
| 32 |                                                                                                                                                                                           |                      |          |                  |
| 33 | 1 Mutation analysis of autosomal dominant polycystic kidney disease genes in Han Chinese.                                                                                                 | Zhang S et al.       | 15775720 | No data for ACE2 |
| 34 |                                                                                                                                                                                           |                      |          |                  |
| 35 |                                                                                                                                                                                           |                      |          |                  |
| 36 | 1 Genetic variation at the ACE gene is associated with persistent microalbuminuria and severe nephropathy in type 1 diabetes: the DCCT/EDIC Genetics Study.                               | Boright AP et al.    | 15793268 | No data for ACE2 |
| 37 |                                                                                                                                                                                           |                      |          |                  |
| 38 |                                                                                                                                                                                           |                      |          |                  |
| 39 |                                                                                                                                                                                           |                      |          |                  |
| 40 |                                                                                                                                                                                           |                      |          |                  |
| 41 |                                                                                                                                                                                           |                      |          |                  |
| 42 |                                                                                                                                                                                           |                      |          |                  |
| 43 |                                                                                                                                                                                           |                      |          |                  |
| 44 |                                                                                                                                                                                           |                      |          |                  |
| 45 |                                                                                                                                                                                           |                      |          |                  |
| 46 |                                                                                                                                                                                           |                      |          |                  |



|    |                                                                                                                                  |                                                                                                                                                                                                               |                     |                  |                  |
|----|----------------------------------------------------------------------------------------------------------------------------------|---------------------------------------------------------------------------------------------------------------------------------------------------------------------------------------------------------------|---------------------|------------------|------------------|
| 1  | Nitric oxide- and EDHF-mediated arteriolar tone in uremia is unaffected by selective inhibition of vascular cytochrome P450 2C9. | Passauer J et al.                                                                                                                                                                                             | 15840038            | No data for ACE2 |                  |
| 2  |                                                                                                                                  |                                                                                                                                                                                                               |                     |                  |                  |
| 3  |                                                                                                                                  |                                                                                                                                                                                                               |                     |                  |                  |
| 4  |                                                                                                                                  |                                                                                                                                                                                                               |                     |                  |                  |
| 5  |                                                                                                                                  |                                                                                                                                                                                                               |                     |                  |                  |
| 6  | 1                                                                                                                                | Association between vitamin D receptor FokI. Polymorphism and serum parathyroid hormone level in patients with chronic renal failure.                                                                         | Vigo Gago E et al.  | 15887856         | No data for ACE2 |
| 7  |                                                                                                                                  |                                                                                                                                                                                                               |                     |                  |                  |
| 8  |                                                                                                                                  |                                                                                                                                                                                                               |                     |                  |                  |
| 9  |                                                                                                                                  |                                                                                                                                                                                                               |                     |                  |                  |
| 10 | 1                                                                                                                                | Polymorphisms of the renin-angiotensin system genes in Brazilian patients with lupus nephropathy.                                                                                                             | Sprovieri SR et al. | 15934435         | No data for ACE2 |
| 11 |                                                                                                                                  |                                                                                                                                                                                                               |                     |                  |                  |
| 12 |                                                                                                                                  |                                                                                                                                                                                                               |                     |                  |                  |
| 13 |                                                                                                                                  |                                                                                                                                                                                                               |                     |                  |                  |
| 14 | 1                                                                                                                                | Effect of hepatic lipase -514C->T polymorphism and its interactions with apolipoprotein C3 -482C->T and apolipoprotein E exon 4 polymorphisms on the risk of nephropathy in chinese type 2 diabetic patients. | Baum L et al.       | 15983323         | No data for ACE2 |
| 15 |                                                                                                                                  |                                                                                                                                                                                                               |                     |                  |                  |
| 16 | 1                                                                                                                                | The impact of thiopurine s-methyltransferase polymorphism on azathioprine-induced myelotoxicity in renal transplant recipients.                                                                               | Kurzawski M et al.  | 16044099         | No data for ACE2 |
| 17 |                                                                                                                                  |                                                                                                                                                                                                               |                     |                  |                  |
| 18 |                                                                                                                                  |                                                                                                                                                                                                               |                     |                  |                  |
| 19 | 1                                                                                                                                | Carnosine as a protective factor in diabetic nephropathy: association with a leucine repeat of the carnosinase gene CNDP1.                                                                                    | Janssen B et al.    | 16046297         | No data for ACE2 |
| 20 |                                                                                                                                  |                                                                                                                                                                                                               |                     |                  |                  |
| 21 | 1                                                                                                                                | Impact of polymorphisms in the genes encoding xylosyltransferase I and a homologue in type 1 diabetic patients with and without nephropathy.                                                                  | Schon S et al.      | 16164625         | No data for ACE2 |
| 22 |                                                                                                                                  |                                                                                                                                                                                                               |                     |                  |                  |
| 23 | 1                                                                                                                                | Frequency of angiotensin-converting enzyme gene polymorphism in Turkish type 2 diabetic patients.                                                                                                             | Degirmenci I et al. | 16178979         | No data for ACE2 |
| 24 |                                                                                                                                  |                                                                                                                                                                                                               |                     |                  |                  |
| 25 |                                                                                                                                  |                                                                                                                                                                                                               |                     |                  |                  |
| 26 | 1                                                                                                                                | Haplotype analysis of NAD(P)H oxidase p22 phox polymorphisms in end-stage renal disease.                                                                                                                      | Doi K et al.        | 16215641         | No data for ACE2 |
| 27 |                                                                                                                                  |                                                                                                                                                                                                               |                     |                  |                  |
| 28 | 1                                                                                                                                | The effect of angiotensin receptor blockade ARB on the regression of left ventricular hypertrophy in hemodialysis patients: comparison between patients with D allele and non-D allele ACE gene polymorphism. | Nakayama M et al.   | 16312263         | No data for ACE2 |
| 29 |                                                                                                                                  |                                                                                                                                                                                                               |                     |                  |                  |
| 30 |                                                                                                                                  |                                                                                                                                                                                                               |                     |                  |                  |
| 31 | 1                                                                                                                                | Manganese superoxide dismutase gene polymorphism (V16A) is associated with stages of albuminuria in Korean type 2 diabetic patients.                                                                          | Lee SJ et al.       | 16324912         | No data for ACE2 |
| 32 |                                                                                                                                  |                                                                                                                                                                                                               |                     |                  |                  |
| 33 |                                                                                                                                  |                                                                                                                                                                                                               |                     |                  |                  |
| 34 | 1                                                                                                                                | Hidden population substructures in an apparently homogeneous population bias association studies.                                                                                                             | Berger M et al.     | 16333311         | No data for ACE2 |
| 35 |                                                                                                                                  |                                                                                                                                                                                                               |                     |                  |                  |
| 36 |                                                                                                                                  |                                                                                                                                                                                                               |                     |                  |                  |
| 37 | 1                                                                                                                                | Relationship of p22phox C242T polymorphism with nephropathy in type 2 diabetic patients.                                                                                                                      | Santos KG et al.    | 16358232         | No data for ACE2 |
| 38 |                                                                                                                                  |                                                                                                                                                                                                               |                     |                  |                  |
| 39 |                                                                                                                                  |                                                                                                                                                                                                               |                     |                  |                  |
| 40 |                                                                                                                                  |                                                                                                                                                                                                               |                     |                  |                  |
| 41 |                                                                                                                                  |                                                                                                                                                                                                               |                     |                  |                  |
| 42 |                                                                                                                                  |                                                                                                                                                                                                               |                     |                  |                  |
| 43 |                                                                                                                                  |                                                                                                                                                                                                               |                     |                  |                  |
| 44 |                                                                                                                                  |                                                                                                                                                                                                               |                     |                  |                  |
| 45 |                                                                                                                                  |                                                                                                                                                                                                               |                     |                  |                  |
| 46 |                                                                                                                                  |                                                                                                                                                                                                               |                     |                  |                  |



|    |                                                                                   |                                                                                                                                                                                              |                    |                  |                  |
|----|-----------------------------------------------------------------------------------|----------------------------------------------------------------------------------------------------------------------------------------------------------------------------------------------|--------------------|------------------|------------------|
| 1  | Genetic polymorphisms of the renin-angiotensin system in end-stage renal disease. | Buraczynska M et al.                                                                                                                                                                         | 16384824           | No data for ACE2 |                  |
| 2  |                                                                                   |                                                                                                                                                                                              |                    |                  |                  |
| 3  |                                                                                   |                                                                                                                                                                                              |                    |                  |                  |
| 4  |                                                                                   |                                                                                                                                                                                              |                    |                  |                  |
| 5  |                                                                                   |                                                                                                                                                                                              |                    |                  |                  |
| 6  |                                                                                   |                                                                                                                                                                                              |                    |                  |                  |
| 7  | 1                                                                                 | Angiotensin-converting enzyme (ACE) inhibition in type 2, diabetic patients-- interaction with ACE insertion/deletion polymorphism.                                                          | So WY et al.       | 16395257         | No data for ACE2 |
| 8  |                                                                                   |                                                                                                                                                                                              |                    |                  |                  |
| 9  |                                                                                   |                                                                                                                                                                                              |                    |                  |                  |
| 10 |                                                                                   |                                                                                                                                                                                              |                    |                  |                  |
| 11 | 1                                                                                 | The influence of the endothelin-converting enzyme-1 gene polymorphism on the progression of autosomal dominant polycystic kidney disease.                                                    | Reiterova J et al. | 16526315         | No data for ACE2 |
| 12 |                                                                                   |                                                                                                                                                                                              |                    |                  |                  |
| 13 |                                                                                   |                                                                                                                                                                                              |                    |                  |                  |
| 14 | 1                                                                                 | Aldosterone synthase (CYP11B2) -344T/C polymorphism is not associated with the initiation and progression of diabetic nephropathy in Caucasian Type 1 diabetic patients.                     | Lajer M et al.     | 16759311         | No data for ACE2 |
| 15 |                                                                                   |                                                                                                                                                                                              |                    |                  |                  |
| 16 |                                                                                   |                                                                                                                                                                                              |                    |                  |                  |
| 17 | 1                                                                                 | Novel sequence variants in the human xylosyltransferase I gene and their role in diabetic nephropathy.                                                                                       | Bahr C et al.      | 16759312         | No data for ACE2 |
| 18 |                                                                                   |                                                                                                                                                                                              |                    |                  |                  |
| 19 |                                                                                   |                                                                                                                                                                                              |                    |                  |                  |
| 20 |                                                                                   |                                                                                                                                                                                              |                    |                  |                  |
| 21 | 1                                                                                 | Relationship between common functional polymorphisms of the p22phox gene (-930A > G and +242C > T) and nephropathy as a result of Type 2 diabetes in a Chinese population.                   | Lim SC et al.      | 16922713         | No data for ACE2 |
| 22 |                                                                                   |                                                                                                                                                                                              |                    |                  |                  |
| 23 | 1                                                                                 | A disease haplotype for advanced nephropathy in type 2 diabetes at the ACE locus.                                                                                                            | Ng DP et al.       | 16936219         | No data for ACE2 |
| 24 |                                                                                   |                                                                                                                                                                                              |                    |                  |                  |
| 25 |                                                                                   |                                                                                                                                                                                              |                    |                  |                  |
| 26 | 1                                                                                 | Efficient screening method of the thiopurine methyltransferase polymorphisms for patients considering taking thiopurine drugs in a Chinese Han population in Henan Province (central China). | Zhang LR et al.    | 16952345         | No data for ACE2 |
| 27 |                                                                                   |                                                                                                                                                                                              |                    |                  |                  |
| 28 |                                                                                   |                                                                                                                                                                                              |                    |                  |                  |
| 29 | 1                                                                                 | Kinin-dependent hypersensitivity reactions in hemodialysis: metabolic and genetic factors.                                                                                                   | Molinaro G et al.  | 17003818         | No data for ACE2 |
| 30 |                                                                                   |                                                                                                                                                                                              |                    |                  |                  |
| 31 |                                                                                   |                                                                                                                                                                                              |                    |                  |                  |
| 32 | 1                                                                                 | High prevalence of ACE DD genotype among north Indian end stage renal disease patients.                                                                                                      | Tripathi G et al.  | 17042963         | No data for ACE2 |
| 33 |                                                                                   |                                                                                                                                                                                              |                    |                  |                  |
| 34 | 1                                                                                 | Sirolimus population pharmacokinetic/pharmacogenetic analysis and bayesian modelling in kidney transplant recipients.                                                                        | Djebli N et al.    | 17048977         | No data for ACE2 |
| 35 |                                                                                   |                                                                                                                                                                                              |                    |                  |                  |
| 36 |                                                                                   |                                                                                                                                                                                              |                    |                  |                  |
| 37 | 1                                                                                 | Glu298Asp and NOS4ab polymorphisms in diabetic nephropathy.                                                                                                                                  | Mollsten A et al.  | 17101543         | No data for ACE2 |
| 38 |                                                                                   |                                                                                                                                                                                              |                    |                  |                  |
| 39 |                                                                                   |                                                                                                                                                                                              |                    |                  |                  |
| 40 |                                                                                   |                                                                                                                                                                                              |                    |                  |                  |
| 41 |                                                                                   |                                                                                                                                                                                              |                    |                  |                  |
| 42 |                                                                                   |                                                                                                                                                                                              |                    |                  |                  |
| 43 |                                                                                   |                                                                                                                                                                                              |                    |                  |                  |
| 44 |                                                                                   |                                                                                                                                                                                              |                    |                  |                  |
| 45 |                                                                                   |                                                                                                                                                                                              |                    |                  |                  |
| 46 |                                                                                   |                                                                                                                                                                                              |                    |                  |                  |

|    |                                                                                                                      |                                                                                                                                                                               |                          |                  |                  |
|----|----------------------------------------------------------------------------------------------------------------------|-------------------------------------------------------------------------------------------------------------------------------------------------------------------------------|--------------------------|------------------|------------------|
| 1  | Combinational effect of genes for the renin-angiotensin system in conferring susceptibility to diabetic nephropathy. | Osawa N et al.                                                                                                                                                                | 17143591                 | No data for ACE2 |                  |
| 2  |                                                                                                                      |                                                                                                                                                                               |                          |                  |                  |
| 3  |                                                                                                                      |                                                                                                                                                                               |                          |                  |                  |
| 4  |                                                                                                                      |                                                                                                                                                                               |                          |                  |                  |
| 5  |                                                                                                                      |                                                                                                                                                                               |                          |                  |                  |
| 6  | 1                                                                                                                    | The emergence of cytomegalovirus resistance to ganciclovir therapy in kidney transplant recipients.                                                                           | Nogueira E et al.        | 17161359         | No data for ACE2 |
| 7  |                                                                                                                      |                                                                                                                                                                               |                          |                  |                  |
| 8  |                                                                                                                      |                                                                                                                                                                               |                          |                  |                  |
| 9  | 1                                                                                                                    | Paraoxonase gene polymorphism and serum activity in progressive IgA nephropathy.                                                                                              | Kovacs TJ et al.         | 17173245         | No data for ACE2 |
| 10 |                                                                                                                      |                                                                                                                                                                               |                          |                  |                  |
| 11 | 1                                                                                                                    | A functional polymorphism in the manganese superoxide dismutase gene and diabetic nephropathy.                                                                                | Mollsten A et al.        | 17192491         | No data for ACE2 |
| 12 |                                                                                                                      |                                                                                                                                                                               |                          |                  |                  |
| 13 | 1                                                                                                                    | A leucine repeat in the carnosinase gene CNDP1 is associated with diabetic end-stage renal disease in European Americans.                                                     | Freedman BI et al.       | 17205963         | No data for ACE2 |
| 14 |                                                                                                                      |                                                                                                                                                                               |                          |                  |                  |
| 15 | 1                                                                                                                    | Variants of C1GALT1 gene are associated with the genetic susceptibility to IgA nephropathy.                                                                                   | Li GS et al.             | 17228361         | No data for ACE2 |
| 16 |                                                                                                                      |                                                                                                                                                                               |                          |                  |                  |
| 17 | 1                                                                                                                    | Resequencing of genes for transforming growth factor beta1 (TGFB1) type 1 and 2 receptors (TGFB1, TGFB2), and association analysis of variants with diabetic nephropathy.     | McKnight AJ et al.       | 17319955         | No data for ACE2 |
| 18 |                                                                                                                      |                                                                                                                                                                               |                          |                  |                  |
| 19 | 1                                                                                                                    | Association between angiotensin-converting enzyme gene polymorphisms and diabetic nephropathy: case-control, haplotype, and family-based study in three European populations. | Hadjadj S et al.         | 17376814         | No data for ACE2 |
| 20 |                                                                                                                      |                                                                                                                                                                               |                          |                  |                  |
| 21 | 1                                                                                                                    | Association of endothelial nitric oxide synthase gene intron 4 polymorphism with end-stage renal disease.                                                                     | Bellini MH et al.        | 17498125         | No data for ACE2 |
| 22 |                                                                                                                      |                                                                                                                                                                               |                          |                  |                  |
| 23 | 1                                                                                                                    | [Angiotensin-1 converting enzyme insertion/deletion gene polymorphism in a Mexican population with diabetic nephropathy].                                                     | Ortega-Pierres LE et al. | 17570179         | No data for ACE2 |
| 24 |                                                                                                                      |                                                                                                                                                                               |                          |                  |                  |
| 25 | 1                                                                                                                    | Disease progression, response to ACEI/ATRA therapy and influence of ACE gene in IgA nephritis.                                                                                | Woo KT et al.            | 17601378         | No data for ACE2 |
| 26 |                                                                                                                      |                                                                                                                                                                               |                          |                  |                  |
| 27 | 1                                                                                                                    | Relationship of angiotensin-converting enzyme gene polymorphism with nephropathy associated with Type 2 diabetes mellitus in Asian Indians.                                   | Movva S et al.           | 17616353         | No data for ACE2 |
| 28 |                                                                                                                      |                                                                                                                                                                               |                          |                  |                  |
| 29 | 1                                                                                                                    | Impact of ENPP1 genotype on arterial calcification in patients with end-stage renal failure.                                                                                  | Eller P et al.           | 17848394         | No data for ACE2 |
| 30 |                                                                                                                      |                                                                                                                                                                               |                          |                  |                  |
| 31 |                                                                                                                      |                                                                                                                                                                               |                          |                  |                  |
| 32 |                                                                                                                      |                                                                                                                                                                               |                          |                  |                  |
| 33 |                                                                                                                      |                                                                                                                                                                               |                          |                  |                  |
| 34 |                                                                                                                      |                                                                                                                                                                               |                          |                  |                  |
| 35 |                                                                                                                      |                                                                                                                                                                               |                          |                  |                  |
| 36 |                                                                                                                      |                                                                                                                                                                               |                          |                  |                  |
| 37 |                                                                                                                      |                                                                                                                                                                               |                          |                  |                  |
| 38 |                                                                                                                      |                                                                                                                                                                               |                          |                  |                  |
| 39 |                                                                                                                      |                                                                                                                                                                               |                          |                  |                  |
| 40 |                                                                                                                      |                                                                                                                                                                               |                          |                  |                  |
| 41 |                                                                                                                      |                                                                                                                                                                               |                          |                  |                  |
| 42 |                                                                                                                      |                                                                                                                                                                               |                          |                  |                  |
| 43 |                                                                                                                      |                                                                                                                                                                               |                          |                  |                  |
| 44 |                                                                                                                      |                                                                                                                                                                               |                          |                  |                  |
| 45 |                                                                                                                      |                                                                                                                                                                               |                          |                  |                  |
| 46 |                                                                                                                      |                                                                                                                                                                               |                          |                  |                  |

|    |                                                                                                                                                                                                                                                                               |                                                                                                                                                                                  |                     |                  |                  |
|----|-------------------------------------------------------------------------------------------------------------------------------------------------------------------------------------------------------------------------------------------------------------------------------|----------------------------------------------------------------------------------------------------------------------------------------------------------------------------------|---------------------|------------------|------------------|
| 1  | Multiple superoxide dismutase 1/splicing factor serine alanine 15 variants are associated with the development and progression of diabetic nephropathy: the Diabetes Control and Complications Trial/Epidemiology of Diabetes Interventions and Complications Genetics study. | Al-Kateb H et al.                                                                                                                                                                | 17914031            | No data for ACE2 |                  |
| 2  |                                                                                                                                                                                                                                                                               |                                                                                                                                                                                  |                     |                  |                  |
| 3  |                                                                                                                                                                                                                                                                               |                                                                                                                                                                                  |                     |                  |                  |
| 4  |                                                                                                                                                                                                                                                                               |                                                                                                                                                                                  |                     |                  |                  |
| 5  |                                                                                                                                                                                                                                                                               |                                                                                                                                                                                  |                     |                  |                  |
| 6  |                                                                                                                                                                                                                                                                               |                                                                                                                                                                                  |                     |                  |                  |
| 7  |                                                                                                                                                                                                                                                                               |                                                                                                                                                                                  |                     |                  |                  |
| 8  |                                                                                                                                                                                                                                                                               |                                                                                                                                                                                  |                     |                  |                  |
| 9  | 1                                                                                                                                                                                                                                                                             | Association between vitamin D receptor gene polymorphisms and susceptibility to chronic kidney disease and periodontitis.                                                        | de Souza CM et al.  | 17914260         | No data for ACE2 |
| 10 |                                                                                                                                                                                                                                                                               |                                                                                                                                                                                  |                     |                  |                  |
| 11 | 1                                                                                                                                                                                                                                                                             | Gene polymorphisms of the renin-angiotensin-aldosterone system and angiotensin II type 1-receptor activating antibodies in renal rejection.                                      | Zhang G et al.      | 17984617         | No data for ACE2 |
| 12 |                                                                                                                                                                                                                                                                               |                                                                                                                                                                                  |                     |                  |                  |
| 13 | 1                                                                                                                                                                                                                                                                             | Correlates of ACE activity in macroalbuminuric type 2 diabetic patients treated with chronic ACE inhibition.                                                                     | Nikzamir A et al.   | 17986476         | No data for ACE2 |
| 14 |                                                                                                                                                                                                                                                                               |                                                                                                                                                                                  |                     |                  |                  |
| 15 | 1                                                                                                                                                                                                                                                                             | Genotyping with a dried blood spot method: a useful technique for application in pharmacogenetics.                                                                               | Wijnen PA et al.    | 18028890         | No data for ACE2 |
| 16 |                                                                                                                                                                                                                                                                               |                                                                                                                                                                                  |                     |                  |                  |
| 17 | 1                                                                                                                                                                                                                                                                             | Relationship between GSTs gene polymorphism and susceptibility to end stage renal disease among North Indians.                                                                   | Agrawal S et al.    | 18067039         | No data for ACE2 |
| 18 |                                                                                                                                                                                                                                                                               |                                                                                                                                                                                  |                     |                  |                  |
| 19 | 1                                                                                                                                                                                                                                                                             | Polymorphism of the endothelial nitric oxide synthase gene is associated with diabetic retinopathy in a cohort of West Africans.                                                 | Chen Y et al.       | 18079690         | No data for ACE2 |
| 20 |                                                                                                                                                                                                                                                                               |                                                                                                                                                                                  |                     |                  |                  |
| 21 | 1                                                                                                                                                                                                                                                                             | Association of the distal region of the ectonucleotide pyrophosphatase/phosphodiesterase 1 gene with type 2 diabetes in an African-American population enriched for nephropathy. | Keene KL et al.     | 18184924         | No data for ACE2 |
| 22 |                                                                                                                                                                                                                                                                               |                                                                                                                                                                                  |                     |                  |                  |
| 23 | 1                                                                                                                                                                                                                                                                             | Genetic risk factors for renal failure among north Indian ESRD patients.                                                                                                         | Tripathi G et al.   | 18242170         | No data for ACE2 |
| 24 |                                                                                                                                                                                                                                                                               |                                                                                                                                                                                  |                     |                  |                  |
| 25 | 1                                                                                                                                                                                                                                                                             | Donor DNA is detected in recipient blood for years after kidney transplantation using sensitive forensic medicine methods.                                                       | Rutkowska J et al.  | 18290564         | No data for ACE2 |
| 26 |                                                                                                                                                                                                                                                                               |                                                                                                                                                                                  |                     |                  |                  |
| 27 | 1                                                                                                                                                                                                                                                                             | Anti-glutathione S-transferase T1 antibody-mediated rejection in C4d-positive renal allograft recipients.                                                                        | Aguilera I et al.   | 18308775         | No data for ACE2 |
| 28 |                                                                                                                                                                                                                                                                               |                                                                                                                                                                                  |                     |                  |                  |
| 29 | 1                                                                                                                                                                                                                                                                             | Endothelial nitric oxide synthase polymorphisms are associated with hypertension and cardiovascular disease in renal transplantation.                                            | Bhandary UV et al.  | 18331440         | No data for ACE2 |
| 30 |                                                                                                                                                                                                                                                                               |                                                                                                                                                                                  |                     |                  |                  |
| 31 | 1                                                                                                                                                                                                                                                                             | Endothelial nitric oxide synthase gene haplotypes and diabetic nephropathy among Asian Indians.                                                                                  | Ahluwalia TS et al. | 18401556         | No data for ACE2 |
| 32 |                                                                                                                                                                                                                                                                               |                                                                                                                                                                                  |                     |                  |                  |
| 33 |                                                                                                                                                                                                                                                                               |                                                                                                                                                                                  |                     |                  |                  |
| 34 |                                                                                                                                                                                                                                                                               |                                                                                                                                                                                  |                     |                  |                  |
| 35 |                                                                                                                                                                                                                                                                               |                                                                                                                                                                                  |                     |                  |                  |
| 36 |                                                                                                                                                                                                                                                                               |                                                                                                                                                                                  |                     |                  |                  |
| 37 |                                                                                                                                                                                                                                                                               |                                                                                                                                                                                  |                     |                  |                  |
| 38 |                                                                                                                                                                                                                                                                               |                                                                                                                                                                                  |                     |                  |                  |
| 39 |                                                                                                                                                                                                                                                                               |                                                                                                                                                                                  |                     |                  |                  |
| 40 |                                                                                                                                                                                                                                                                               |                                                                                                                                                                                  |                     |                  |                  |
| 41 |                                                                                                                                                                                                                                                                               |                                                                                                                                                                                  |                     |                  |                  |
| 42 |                                                                                                                                                                                                                                                                               |                                                                                                                                                                                  |                     |                  |                  |
| 43 |                                                                                                                                                                                                                                                                               |                                                                                                                                                                                  |                     |                  |                  |
| 44 |                                                                                                                                                                                                                                                                               |                                                                                                                                                                                  |                     |                  |                  |
| 45 |                                                                                                                                                                                                                                                                               |                                                                                                                                                                                  |                     |                  |                  |
| 46 |                                                                                                                                                                                                                                                                               |                                                                                                                                                                                  |                     |                  |                  |

|    |                                                                                                                                                      |               |          |                  |
|----|------------------------------------------------------------------------------------------------------------------------------------------------------|---------------|----------|------------------|
| 1  | Lack of association between the angiotensin-converting enzyme gene (I/D) polymorphism and diabetic nephropathy in Tunisian type 2 diabetic patients. | Arfa I et al. | 18404607 | No data for ACE2 |
| 2  |                                                                                                                                                      |               |          |                  |
| 3  |                                                                                                                                                      |               |          |                  |
| 4  |                                                                                                                                                      |               |          |                  |
| 5  |                                                                                                                                                      |               |          |                  |
| 6  |                                                                                                                                                      |               |          |                  |
| 7  |                                                                                                                                                      |               |          |                  |
| 8  |                                                                                                                                                      |               |          |                  |
| 9  |                                                                                                                                                      |               |          |                  |
| 10 |                                                                                                                                                      |               |          |                  |
| 11 |                                                                                                                                                      |               |          |                  |
| 12 |                                                                                                                                                      |               |          |                  |
| 13 |                                                                                                                                                      |               |          |                  |
| 14 |                                                                                                                                                      |               |          |                  |
| 15 |                                                                                                                                                      |               |          |                  |
| 16 |                                                                                                                                                      |               |          |                  |
| 17 |                                                                                                                                                      |               |          |                  |
| 18 |                                                                                                                                                      |               |          |                  |
| 19 |                                                                                                                                                      |               |          |                  |
| 20 |                                                                                                                                                      |               |          |                  |
| 21 |                                                                                                                                                      |               |          |                  |
| 22 |                                                                                                                                                      |               |          |                  |
| 23 |                                                                                                                                                      |               |          |                  |
| 24 |                                                                                                                                                      |               |          |                  |
| 25 |                                                                                                                                                      |               |          |                  |
| 26 |                                                                                                                                                      |               |          |                  |
| 27 |                                                                                                                                                      |               |          |                  |
| 28 |                                                                                                                                                      |               |          |                  |
| 29 |                                                                                                                                                      |               |          |                  |
| 30 |                                                                                                                                                      |               |          |                  |
| 31 |                                                                                                                                                      |               |          |                  |
| 32 |                                                                                                                                                      |               |          |                  |
| 33 |                                                                                                                                                      |               |          |                  |
| 34 |                                                                                                                                                      |               |          |                  |
| 35 |                                                                                                                                                      |               |          |                  |
| 36 |                                                                                                                                                      |               |          |                  |
| 37 |                                                                                                                                                      |               |          |                  |
| 38 |                                                                                                                                                      |               |          |                  |
| 39 |                                                                                                                                                      |               |          |                  |
| 40 |                                                                                                                                                      |               |          |                  |
| 41 |                                                                                                                                                      |               |          |                  |
| 42 |                                                                                                                                                      |               |          |                  |
| 43 |                                                                                                                                                      |               |          |                  |
| 44 |                                                                                                                                                      |               |          |                  |
| 45 |                                                                                                                                                      |               |          |                  |
| 46 |                                                                                                                                                      |               |          |                  |

|    |                                                                                                                                                                                          |                       |          |                  |
|----|------------------------------------------------------------------------------------------------------------------------------------------------------------------------------------------|-----------------------|----------|------------------|
| 1  | Polymorphism of the aldosterone synthase gene is not associated with progression of diabetic nephropathy, but associated with hypertension in type 2 diabetic patients.                  | Ko GJ et al.          | 18771471 | No data for ACE2 |
| 2  |                                                                                                                                                                                          |                       |          |                  |
| 3  |                                                                                                                                                                                          |                       |          |                  |
| 4  |                                                                                                                                                                                          |                       |          |                  |
| 5  |                                                                                                                                                                                          |                       |          |                  |
| 6  | 1                                                                                                                                                                                        |                       |          |                  |
| 7  | Association of endothelial nitric oxide synthase Glu298Asp polymorphism with end-stage renal disease.                                                                                    | Thaha M et al.        | 18793530 | No data for ACE2 |
| 8  |                                                                                                                                                                                          |                       |          |                  |
| 9  |                                                                                                                                                                                          |                       |          |                  |
| 10 |                                                                                                                                                                                          |                       |          |                  |
| 11 | 1                                                                                                                                                                                        |                       |          |                  |
| 12 | MYH9 is associated with nondiabetic end-stage renal disease in African Americans.                                                                                                        | Kao WH et al.         | 18794854 | No data for ACE2 |
| 13 |                                                                                                                                                                                          |                       |          |                  |
| 14 | 1                                                                                                                                                                                        |                       |          |                  |
| 15 | MYH9 is a major-effect risk gene for focal segmental glomerulosclerosis.                                                                                                                 | Kopp JB et al.        | 18794856 | No data for ACE2 |
| 16 |                                                                                                                                                                                          |                       |          |                  |
| 17 | 1                                                                                                                                                                                        |                       |          |                  |
| 18 | Characterization of the transcriptional regulation of the human MT1-MMP gene and association of risk reduction for focal-segmental glomerulosclerosis with two functional promoter SNPs. | Munkert A et al.      | 18927121 | No data for ACE2 |
| 19 |                                                                                                                                                                                          |                       |          |                  |
| 20 | 1                                                                                                                                                                                        |                       |          |                  |
| 21 | The manganese superoxide dismutase Val16Ala polymorphism is associated with decreased risk of diabetic nephropathy in Chinese patients with type 2 diabetes.                             | Liu L et al.          | 18989629 | No data for ACE2 |
| 22 |                                                                                                                                                                                          |                       |          |                  |
| 23 | 1                                                                                                                                                                                        |                       |          |                  |
| 24 | Survival in type 2 diabetic patients in dialysis and the number of risk alleles in polymorphisms of the renin-angiotensin system genes.                                                  | Padro-Miquel A et al. | 19014923 | No data for ACE2 |
| 25 |                                                                                                                                                                                          |                       |          |                  |
| 26 | 1                                                                                                                                                                                        |                       |          |                  |
| 27 | ACE genotype, body weight changes and target organ damage in renal transplant recipients.                                                                                                | Stratta P et al.      | 19034872 | No data for ACE2 |
| 28 |                                                                                                                                                                                          |                       |          |                  |
| 29 | 1                                                                                                                                                                                        |                       |          |                  |
| 30 | Relationships between thiopurine S-methyltransferase polymorphism and azathioprine-related adverse drug reactions in Chinese renal transplant recipients.                                | Xin HW et al.         | 19048245 | No data for ACE2 |
| 31 |                                                                                                                                                                                          |                       |          |                  |
| 32 | 1                                                                                                                                                                                        |                       |          |                  |
| 33 | Influence of CYP3A5 genetic polymorphism on tacrolimus daily dose requirements and acute rejection in renal graft recipients.                                                            | Quteineh L et al.     | 19067682 | No data for ACE2 |
| 34 |                                                                                                                                                                                          |                       |          |                  |
| 35 | 1                                                                                                                                                                                        |                       |          |                  |
| 36 | Tripterygium wilfordii hook f increase the blood concentration of tacrolimus.                                                                                                            | Wen J et al.          | 19100464 | No data for ACE2 |
| 37 |                                                                                                                                                                                          |                       |          |                  |
| 38 | 1                                                                                                                                                                                        |                       |          |                  |
| 39 | ACE variants interact with the RAS pathway to confer risk and protection against type 2 diabetic nephropathy.                                                                            | Ahluwalia TS et al.   | 19108684 | No data for ACE2 |
| 40 |                                                                                                                                                                                          |                       |          |                  |
| 41 | 1                                                                                                                                                                                        |                       |          |                  |
| 42 | A novel method for monitoring glucocorticoid-induced changes of the glucocorticoid receptor in kidney transplant recipients.                                                             | Chen Y et al.         | 19162184 | No data for ACE2 |
| 43 |                                                                                                                                                                                          |                       |          |                  |
| 44 |                                                                                                                                                                                          |                       |          |                  |
| 45 |                                                                                                                                                                                          |                       |          |                  |
| 46 |                                                                                                                                                                                          |                       |          |                  |

|    |                                                                                                                                                                                     |                     |          |                  |
|----|-------------------------------------------------------------------------------------------------------------------------------------------------------------------------------------|---------------------|----------|------------------|
| 1  | Polymorphisms in the non-muscle myosin heavy chain 9 gene (MYH9) are strongly associated with end-stage renal disease historically attributed to hypertension in African Americans. | Freedman BI et al.  | 19177153 | No data for ACE2 |
| 2  |                                                                                                                                                                                     |                     |          |                  |
| 3  |                                                                                                                                                                                     |                     |          |                  |
| 4  |                                                                                                                                                                                     |                     |          |                  |
| 5  |                                                                                                                                                                                     |                     |          |                  |
| 6  | 1                                                                                                                                                                                   |                     |          |                  |
| 7  | Matrix metalloproteinase-1 and matrix metalloproteinase-3 gene promoter polymorphisms are associated with mortality in haemodialysis patients.                                      | Cozzolino M et al.  | 19221176 | No data for ACE2 |
| 8  |                                                                                                                                                                                     |                     |          |                  |
| 9  |                                                                                                                                                                                     |                     |          |                  |
| 10 |                                                                                                                                                                                     |                     |          |                  |
| 11 | 1                                                                                                                                                                                   |                     |          |                  |
| 12 | TPMT but not ITPA gene polymorphism influences the risk of azathioprine intolerance in renal transplant recipients.                                                                 | Kurzawski M et al.  | 19229528 | No data for ACE2 |
| 13 |                                                                                                                                                                                     |                     |          |                  |
| 14 | 1                                                                                                                                                                                   |                     |          |                  |
| 15 | Genetic variant of C1GalT1 contributes to the susceptibility to IgA nephropathy.                                                                                                    | Pirulli D et al.    | 19229831 | No data for ACE2 |
| 16 |                                                                                                                                                                                     |                     |          |                  |
| 17 | 1                                                                                                                                                                                   |                     |          |                  |
| 18 | The endothelial nitric oxide synthase gene and risk of diabetic nephropathy and development of cardiovascular disease in type 1 diabetes.                                           | Mollsten A et al.   | 19246226 | No data for ACE2 |
| 19 |                                                                                                                                                                                     |                     |          |                  |
| 20 | 1                                                                                                                                                                                   |                     |          |                  |
| 21 | Association of genetic variants with chronic kidney disease in Japanese individuals with type 2 diabetes mellitus.                                                                  | Yoshida T et al.    | 19288030 | No data for ACE2 |
| 22 |                                                                                                                                                                                     |                     |          |                  |
| 23 | 1                                                                                                                                                                                   |                     |          |                  |
| 24 | The PTPN22 C1858T (R620W) functional polymorphism in kidney transplantation.                                                                                                        | Sfar I et al.       | 19328948 | No data for ACE2 |
| 25 |                                                                                                                                                                                     |                     |          |                  |
| 26 | 1                                                                                                                                                                                   |                     |          |                  |
| 27 | Elevated MBL concentrations are not an indication of association between the MBL2 gene and type 1 diabetes or diabetic nephropathy.                                                 | Kaunisto MA et al.  | 19366862 | No data for ACE2 |
| 28 |                                                                                                                                                                                     |                     |          |                  |
| 29 | 1                                                                                                                                                                                   |                     |          |                  |
| 30 | The influence of carnosinase gene polymorphisms on diabetic nephropathy risk in African-Americans.                                                                                  | McDonough CW et al. | 19373489 | No data for ACE2 |
| 31 |                                                                                                                                                                                     |                     |          |                  |
| 32 | 1                                                                                                                                                                                   |                     |          |                  |
| 33 | Endothelial nitric oxide synthetase, methylenetetrahydrofolate reductase polymorphisms, and cardiovascular complications in Tunisian patients with nondiabetic renal disease.       | Kerkeni M et al.    | 19376104 | No data for ACE2 |
| 34 |                                                                                                                                                                                     |                     |          |                  |
| 35 | 1                                                                                                                                                                                   |                     |          |                  |
| 36 | Association of genetic variants with chronic kidney disease in Japanese individuals.                                                                                                | Yoshida T et al.    | 19406964 | No data for ACE2 |
| 37 |                                                                                                                                                                                     |                     |          |                  |
| 38 | 1                                                                                                                                                                                   |                     |          |                  |
| 39 | Microarray analysis of multiple candidate genes and associated plasma proteins for nephropathy secondary to type 2 diabetes among Chinese individuals.                              | Lim SC et al.       | 19415232 | No data for ACE2 |
| 40 |                                                                                                                                                                                     |                     |          |                  |
| 41 |                                                                                                                                                                                     |                     |          |                  |
| 42 |                                                                                                                                                                                     |                     |          |                  |
| 43 |                                                                                                                                                                                     |                     |          |                  |
| 44 |                                                                                                                                                                                     |                     |          |                  |
| 45 |                                                                                                                                                                                     |                     |          |                  |
| 46 |                                                                                                                                                                                     |                     |          |                  |

|    |                                                                                                                                   |                                                                                                                                                                                                                                                 |                            |                  |                  |
|----|-----------------------------------------------------------------------------------------------------------------------------------|-------------------------------------------------------------------------------------------------------------------------------------------------------------------------------------------------------------------------------------------------|----------------------------|------------------|------------------|
| 1  | Association of gene polymorphisms with chronic kidney disease in high- or low-risk subjects defined by conventional risk factors. | Yoshida T et al.                                                                                                                                                                                                                                | 19424605                   | No data for ACE2 |                  |
| 2  |                                                                                                                                   |                                                                                                                                                                                                                                                 |                            |                  |                  |
| 3  |                                                                                                                                   |                                                                                                                                                                                                                                                 |                            |                  |                  |
| 4  |                                                                                                                                   |                                                                                                                                                                                                                                                 |                            |                  |                  |
| 5  | 1                                                                                                                                 | Influence of genetic polymorphisms in GSTM1, GSTM3, GSTT1 and GSTP1 on allograft outcome in renal transplant recipients.                                                                                                                        | Singh R et al.             | 19486347         | No data for ACE2 |
| 6  |                                                                                                                                   |                                                                                                                                                                                                                                                 |                            |                  |                  |
| 7  |                                                                                                                                   |                                                                                                                                                                                                                                                 |                            |                  |                  |
| 8  |                                                                                                                                   |                                                                                                                                                                                                                                                 |                            |                  |                  |
| 9  | 1                                                                                                                                 | Association and interaction analyses of genetic variants in ADIPOQ, ENPP1, GHSR, PPARgamma and TCF7L2 genes for diabetic nephropathy in a Taiwanese population with type 2 diabetes.                                                            | Wu LS et al.               | 19506043         | No data for ACE2 |
| 10 |                                                                                                                                   |                                                                                                                                                                                                                                                 |                            |                  |                  |
| 11 |                                                                                                                                   |                                                                                                                                                                                                                                                 |                            |                  |                  |
| 12 |                                                                                                                                   |                                                                                                                                                                                                                                                 |                            |                  |                  |
| 13 | 1                                                                                                                                 | Non-muscle myosin heavy chain 9 gene MYH9 associations in African Americans with clinically diagnosed type 2 diabetes mellitus-associated ESRD.                                                                                                 | Freedman BI et al.         | 19567477         | No data for ACE2 |
| 14 |                                                                                                                                   |                                                                                                                                                                                                                                                 |                            |                  |                  |
| 15 |                                                                                                                                   |                                                                                                                                                                                                                                                 |                            |                  |                  |
| 16 | 1                                                                                                                                 | Association of genetic variants with chronic kidney disease in individuals with different lipid profiles.                                                                                                                                       | Yoshida T et al.           | 19578796         | No data for ACE2 |
| 17 |                                                                                                                                   |                                                                                                                                                                                                                                                 |                            |                  |                  |
| 18 |                                                                                                                                   |                                                                                                                                                                                                                                                 |                            |                  |                  |
| 19 | 1                                                                                                                                 | A HindIII polymorphism of fibronectin gene is associated with nephrolithiasis.                                                                                                                                                                  | Onaran M et al.            | 19616291         | No data for ACE2 |
| 20 |                                                                                                                                   |                                                                                                                                                                                                                                                 |                            |                  |                  |
| 21 | 1                                                                                                                                 | Impact of genetic polymorphisms of the renin-angiotensin system and of non-genetic factors on kidney transplant function--a single-center experience.                                                                                           | Siekierka-Harreis M et al. | 19681973         | No data for ACE2 |
| 22 |                                                                                                                                   |                                                                                                                                                                                                                                                 |                            |                  |                  |
| 23 |                                                                                                                                   |                                                                                                                                                                                                                                                 |                            |                  |                  |
| 24 | 1                                                                                                                                 | Association between inosine triphosphate pyrophosphohydrolase deficiency and azathioprine-related adverse drug reactions in the Chinese kidney transplant recipients.                                                                           | Xiong H et al.             | 19682085         | No data for ACE2 |
| 25 |                                                                                                                                   |                                                                                                                                                                                                                                                 |                            |                  |                  |
| 26 |                                                                                                                                   |                                                                                                                                                                                                                                                 |                            |                  |                  |
| 27 | 1                                                                                                                                 | The prevalence of uridine diphosphate-glucuronosyltransferase 1A9 (UGT1A9) gene promoter region single-nucleotide polymorphisms T-275A and C-2152T and its influence on mycophenolic acid pharmacokinetics in stable renal transplant patients. | Sanchez-Fructoso AI et al. | 19715905         | No data for ACE2 |
| 28 |                                                                                                                                   |                                                                                                                                                                                                                                                 |                            |                  |                  |
| 29 |                                                                                                                                   |                                                                                                                                                                                                                                                 |                            |                  |                  |
| 30 | 1                                                                                                                                 | Association of gene polymorphisms with chronic kidney disease in Japanese individuals.                                                                                                                                                          | Yoshida T et al.           | 19724895         | No data for ACE2 |
| 31 |                                                                                                                                   |                                                                                                                                                                                                                                                 |                            |                  |                  |
| 32 |                                                                                                                                   |                                                                                                                                                                                                                                                 |                            |                  |                  |
| 33 | 1                                                                                                                                 | A rare haplotype of the vitamin D receptor gene is protective against diabetic nephropathy.                                                                                                                                                     | Martin RJ et al.           | 19783860         | No data for ACE2 |
| 34 |                                                                                                                                   |                                                                                                                                                                                                                                                 |                            |                  |                  |
| 35 |                                                                                                                                   |                                                                                                                                                                                                                                                 |                            |                  |                  |
| 36 |                                                                                                                                   |                                                                                                                                                                                                                                                 |                            |                  |                  |
| 37 |                                                                                                                                   |                                                                                                                                                                                                                                                 |                            |                  |                  |
| 38 |                                                                                                                                   |                                                                                                                                                                                                                                                 |                            |                  |                  |
| 39 |                                                                                                                                   |                                                                                                                                                                                                                                                 |                            |                  |                  |
| 40 |                                                                                                                                   |                                                                                                                                                                                                                                                 |                            |                  |                  |
| 41 |                                                                                                                                   |                                                                                                                                                                                                                                                 |                            |                  |                  |
| 42 |                                                                                                                                   |                                                                                                                                                                                                                                                 |                            |                  |                  |
| 43 |                                                                                                                                   |                                                                                                                                                                                                                                                 |                            |                  |                  |
| 44 |                                                                                                                                   |                                                                                                                                                                                                                                                 |                            |                  |                  |
| 45 |                                                                                                                                   |                                                                                                                                                                                                                                                 |                            |                  |                  |
| 46 |                                                                                                                                   |                                                                                                                                                                                                                                                 |                            |                  |                  |

|    |                                                                                                                                                             |                     |          |                  |
|----|-------------------------------------------------------------------------------------------------------------------------------------------------------------|---------------------|----------|------------------|
| 1  | Identification of specific angiotensin-converting enzyme variants and haplotypes that confer risk and protection against type 2 diabetic nephropathy.       | Ezzidi I et al.     | 19787680 | No data for ACE2 |
| 2  |                                                                                                                                                             |                     |          |                  |
| 3  |                                                                                                                                                             |                     |          |                  |
| 4  |                                                                                                                                                             |                     |          |                  |
| 5  |                                                                                                                                                             |                     |          |                  |
| 6  | 1                                                                                                                                                           |                     |          |                  |
| 7  | XbaI GLUT1 gene polymorphism and the risk of type 2 diabetes with nephropathy.                                                                              | Stefanidis I et al. | 19822956 | No data for ACE2 |
| 8  |                                                                                                                                                             |                     |          |                  |
| 9  |                                                                                                                                                             |                     |          |                  |
| 10 |                                                                                                                                                             |                     |          |                  |
| 11 | 1                                                                                                                                                           |                     |          |                  |
| 12 | The V16A polymorphism in SOD2 is associated with increased risk of diabetic nephropathy and cardiovascular disease in type 1 diabetes.                      | Mollsten A et al.   | 19834686 | No data for ACE2 |
| 13 |                                                                                                                                                             |                     |          |                  |
| 14 |                                                                                                                                                             |                     |          |                  |
| 15 | 1                                                                                                                                                           |                     |          |                  |
| 16 | Time of drug administration, CYP3A5 and ABCB1 genotypes, and analytical method influence tacrolimus pharmacokinetics: a population pharmacokinetic study.   | Musuamba FT et al.  | 19855314 | No data for ACE2 |
| 17 |                                                                                                                                                             |                     |          |                  |
| 18 | 1                                                                                                                                                           |                     |          |                  |
| 19 | Impact of donor-dependent genetic factors on long-term renal graft function.                                                                                | Krajewska M et al.  | 19857655 | No data for ACE2 |
| 20 |                                                                                                                                                             |                     |          |                  |
| 21 | 1                                                                                                                                                           |                     |          |                  |
| 22 | Uromodulin levels associate with a common UMOD variant and risk for incident CKD.                                                                           | Kottgen A et al.    | 19959715 | No data for ACE2 |
| 23 |                                                                                                                                                             |                     |          |                  |
| 24 | 1                                                                                                                                                           |                     |          |                  |
| 25 | Endothelial nitric oxide synthase (eNOS) gene polymorphism in early term chronic allograft nephropathy.                                                     | Yilmaz E et al.     | 20005399 | No data for ACE2 |
| 26 |                                                                                                                                                             |                     |          |                  |
| 27 | 1                                                                                                                                                           |                     |          |                  |
| 28 | Circulating methylarginine levels and the decline in renal function in patients with chronic kidney disease are modulated by DDAH1 polymorphisms.           | Caplin B et al.     | 20010544 | No data for ACE2 |
| 29 |                                                                                                                                                             |                     |          |                  |
| 30 | 1                                                                                                                                                           |                     |          |                  |
| 31 | Dense mapping of MYH9 localizes the strongest kidney disease associations to the region of introns 13 to 15.                                                | Nelson GW et al.    | 20124285 | No data for ACE2 |
| 32 |                                                                                                                                                             |                     |          |                  |
| 33 | 1                                                                                                                                                           |                     |          |                  |
| 34 | African ancestry allelic variation at the MYH9 gene contributes to increased susceptibility to non-diabetic end-stage kidney disease in Hispanic Americans. | Behar DM et al.     | 20144966 | No data for ACE2 |
| 35 |                                                                                                                                                             |                     |          |                  |
| 36 | 1                                                                                                                                                           |                     |          |                  |
| 37 | Pharmacogenetics of immunosuppressant polymorphism of CYP3A5 in renal transplant recipients.                                                                | Larriba J et al.    | 20172323 | No data for ACE2 |
| 38 |                                                                                                                                                             |                     |          |                  |
| 39 | 1                                                                                                                                                           |                     |          |                  |
| 40 | Patients with Epstein-Fechtner syndromes owing to MYH9 R702 mutations develop progressive proteinuric renal disease.                                        | Sekine T et al.     | 20200500 | No data for ACE2 |
| 41 |                                                                                                                                                             |                     |          |                  |
| 42 |                                                                                                                                                             |                     |          |                  |
| 43 |                                                                                                                                                             |                     |          |                  |
| 44 |                                                                                                                                                             |                     |          |                  |
| 45 |                                                                                                                                                             |                     |          |                  |
| 46 |                                                                                                                                                             |                     |          |                  |



|    |                                                                                                                                                             |                                                                                                                                                                                                                              |                      |                  |                  |
|----|-------------------------------------------------------------------------------------------------------------------------------------------------------------|------------------------------------------------------------------------------------------------------------------------------------------------------------------------------------------------------------------------------|----------------------|------------------|------------------|
| 1  | Association analysis of ADPRT1, AKR1B1, RAGE, GFPT2 and PAI-1 gene polymorphisms with chronic renal insufficiency among Asian Indians with type-2 diabetes. | Prasad P et al.                                                                                                                                                                                                              | 20353610             | No data for ACE2 |                  |
| 2  |                                                                                                                                                             |                                                                                                                                                                                                                              |                      |                  |                  |
| 3  |                                                                                                                                                             |                                                                                                                                                                                                                              |                      |                  |                  |
| 4  |                                                                                                                                                             |                                                                                                                                                                                                                              |                      |                  |                  |
| 5  |                                                                                                                                                             |                                                                                                                                                                                                                              |                      |                  |                  |
| 6  | 1                                                                                                                                                           | Optimization of initial tacrolimus dose using pharmacogenetic testing.                                                                                                                                                       | Thervet E et al.     | 20393454         | No data for ACE2 |
| 7  |                                                                                                                                                             |                                                                                                                                                                                                                              |                      |                  |                  |
| 8  |                                                                                                                                                             |                                                                                                                                                                                                                              |                      |                  |                  |
| 9  | 1                                                                                                                                                           | Identification of GDNF gene sequence variations in patients with medullary sponge kidney disease.                                                                                                                            | Torregrossa R et al. | 20448065         | No data for ACE2 |
| 10 |                                                                                                                                                             |                                                                                                                                                                                                                              |                      |                  |                  |
| 11 |                                                                                                                                                             |                                                                                                                                                                                                                              |                      |                  |                  |
| 12 | 1                                                                                                                                                           | Association of polymorphisms in the klotho gene with severity of non-diabetic ESRD in African Americans.                                                                                                                     | Bostrom MA et al.    | 20466664         | No data for ACE2 |
| 13 |                                                                                                                                                             |                                                                                                                                                                                                                              |                      |                  |                  |
| 14 | 1                                                                                                                                                           | DDOST, PRKCSH and LGALS3, which encode AGE-receptors 1, 2 and 3, respectively, are not associated with diabetic nephropathy in type 1 diabetes.                                                                              | Hoverfelt A et al.   | 20490454         | No data for ACE2 |
| 15 |                                                                                                                                                             |                                                                                                                                                                                                                              |                      |                  |                  |
| 16 |                                                                                                                                                             |                                                                                                                                                                                                                              |                      |                  |                  |
| 17 | 1                                                                                                                                                           | The acetyl-coenzyme A carboxylase beta (ACACB) gene is associated with nephropathy in Chinese patients with type 2 diabetes.                                                                                                 | Tang SC et al.       | 20519229         | No data for ACE2 |
| 18 |                                                                                                                                                             |                                                                                                                                                                                                                              |                      |                  |                  |
| 19 |                                                                                                                                                             |                                                                                                                                                                                                                              |                      |                  |                  |
| 20 | 1                                                                                                                                                           | Association of trypanolytic ApoL1 variants with kidney disease in African Americans.                                                                                                                                         | Genovese G et al.    | 20647424         | No data for ACE2 |
| 21 |                                                                                                                                                             |                                                                                                                                                                                                                              |                      |                  |                  |
| 22 |                                                                                                                                                             |                                                                                                                                                                                                                              |                      |                  |                  |
| 23 | 1                                                                                                                                                           | A risk allele for focal segmental glomerulosclerosis in African Americans is located within a region containing APOL1 and MYH9.                                                                                              | Genovese G et al.    | 20668430         | No data for ACE2 |
| 24 |                                                                                                                                                             |                                                                                                                                                                                                                              |                      |                  |                  |
| 25 | 1                                                                                                                                                           | ACE gene polymorphism and serum ACE activity in Iranians type II diabetic patients with macroalbuminuria.                                                                                                                    | Felehgari V et al.   | 20830509         | No data for ACE2 |
| 26 |                                                                                                                                                             |                                                                                                                                                                                                                              |                      |                  |                  |
| 27 |                                                                                                                                                             |                                                                                                                                                                                                                              |                      |                  |                  |
| 28 | 1                                                                                                                                                           | Endothelial nitric oxide genotypes and haplotypes are not associated with end-stage renal disease.                                                                                                                           | Marson BP et al.     | 20849252         | No data for ACE2 |
| 29 |                                                                                                                                                             |                                                                                                                                                                                                                              |                      |                  |                  |
| 30 |                                                                                                                                                             |                                                                                                                                                                                                                              |                      |                  |                  |
| 31 | 1                                                                                                                                                           | The frequency of factor V Leiden mutation, ACE gene polymorphism, serum ACE activity and response to ACE inhibitor and angiotensin II receptor antagonist drugs in Iranians type II diabetic patients with microalbuminuria. | Rahimi Z et al.      | 20853144         | No data for ACE2 |
| 32 |                                                                                                                                                             |                                                                                                                                                                                                                              |                      |                  |                  |
| 33 |                                                                                                                                                             |                                                                                                                                                                                                                              |                      |                  |                  |
| 34 | 1                                                                                                                                                           | Association of glutathione S-transferase M1 and T1 gene polymorphism with oxidative stress in diabetic and nondiabetic chronic kidney disease.                                                                               | Datta SK et al.      | 20954980         | No data for ACE2 |
| 35 |                                                                                                                                                             |                                                                                                                                                                                                                              |                      |                  |                  |
| 36 |                                                                                                                                                             |                                                                                                                                                                                                                              |                      |                  |                  |
| 37 | 1                                                                                                                                                           | Toward personalized medicine in renal transplantation.                                                                                                                                                                       | Lampreabe I et al.   | 20970553         | No data for ACE2 |
| 38 |                                                                                                                                                             |                                                                                                                                                                                                                              |                      |                  |                  |
| 39 |                                                                                                                                                             |                                                                                                                                                                                                                              |                      |                  |                  |
| 40 |                                                                                                                                                             |                                                                                                                                                                                                                              |                      |                  |                  |
| 41 |                                                                                                                                                             |                                                                                                                                                                                                                              |                      |                  |                  |
| 42 |                                                                                                                                                             |                                                                                                                                                                                                                              |                      |                  |                  |
| 43 |                                                                                                                                                             |                                                                                                                                                                                                                              |                      |                  |                  |
| 44 |                                                                                                                                                             |                                                                                                                                                                                                                              |                      |                  |                  |
| 45 |                                                                                                                                                             |                                                                                                                                                                                                                              |                      |                  |                  |
| 46 |                                                                                                                                                             |                                                                                                                                                                                                                              |                      |                  |                  |

|    |                                                                                                                                                  |                    |          |                  |
|----|--------------------------------------------------------------------------------------------------------------------------------------------------|--------------------|----------|------------------|
| 1  | Relation between development of cardiovascular disease and the C242T CYBA polymorphism of the NADPH oxidase in ESRD patients.                    | Tang FY et al.     | 21045268 | No data for ACE2 |
| 2  |                                                                                                                                                  |                    |          |                  |
| 3  |                                                                                                                                                  |                    |          |                  |
| 4  |                                                                                                                                                  |                    |          |                  |
| 5  |                                                                                                                                                  |                    |          |                  |
| 6  | Association analysis of Notch pathway signalling genes in diabetic nephropathy.                                                                  | Kavanagh D et al.  | 21103979 | No data for ACE2 |
| 7  |                                                                                                                                                  |                    |          |                  |
| 8  |                                                                                                                                                  |                    |          |                  |
| 9  | [Clinical and genetic basis of hypertensive nephrosclerosis. NEFROSEN Study].                                                                    | Diez Ojea B et al. | 21113220 | No data for ACE2 |
| 10 |                                                                                                                                                  |                    |          |                  |
| 11 | Impact of polymorphisms of the genes encoding angiotensin II-forming enzymes on the progression of IgA nephropathy.                              | Jung ES et al.     | 21150220 | No data for ACE2 |
| 12 |                                                                                                                                                  |                    |          |                  |
| 13 |                                                                                                                                                  |                    |          |                  |
| 14 | Genetic polymorphisms of the renin-angiotensin-aldosterone system in Chinese patients with end-stage renal disease secondary to IgA nephropathy. | Huang HD et al.    | 21163122 | No data for ACE2 |
| 15 |                                                                                                                                                  |                    |          |                  |
| 16 |                                                                                                                                                  |                    |          |                  |
| 17 | Novel polymorphisms associated with tacrolimus trough concentrations: results from a multicenter kidney transplant consortium.                   | Jacobson PA et al. | 21206424 | No data for ACE2 |
| 18 |                                                                                                                                                  |                    |          |                  |
| 19 |                                                                                                                                                  |                    |          |                  |
| 20 | Angiotensin-converting enzyme gene polymorphisms and T2DM in a case-control association study of the Bahraini population.                        | Al-Harbi EM et al. | 21207118 | No data for ACE2 |
| 21 |                                                                                                                                                  |                    |          |                  |
| 22 | Polymorphisms in the nonmuscle myosin heavy chain 9 gene (MYH9) are associated with the progression of IgA nephropathy in Chinese.               | Cheng W et al.     | 21245129 | No data for ACE2 |
| 23 |                                                                                                                                                  |                    |          |                  |
| 24 |                                                                                                                                                  |                    |          |                  |
| 25 | Association of eNOS gene polymorphisms with renal disease in Caucasians with type 2 diabetes.                                                    | Santos KG et al.   | 21255858 | No data for ACE2 |
| 26 |                                                                                                                                                  |                    |          |                  |
| 27 | Genetic variation in the matrix metalloproteinase genes and diabetic nephropathy in type 1 diabetes.                                             | Kure M et al.      | 21277817 | No data for ACE2 |
| 28 |                                                                                                                                                  |                    |          |                  |
| 29 |                                                                                                                                                  |                    |          |                  |
| 30 | Tacrolimus dosing in Chinese renal transplant recipients: a population-based pharmacogenetics study.                                             | Li L et al.        | 21331500 | No data for ACE2 |
| 31 |                                                                                                                                                  |                    |          |                  |
| 32 |                                                                                                                                                  |                    |          |                  |
| 33 | Analysis of insertion/deletion polymorphisms of the angiotensin converting enzyme gene in Malaysian end-stage renal disease patients.            | Ali A et al.       | 21421653 | No data for ACE2 |
| 34 |                                                                                                                                                  |                    |          |                  |
| 35 | In vivo activity of epoxide hydrolase according to sequence variation affects the progression of human IgA nephropathy.                          | Lee JP et al.      | 21429967 | No data for ACE2 |
| 36 |                                                                                                                                                  |                    |          |                  |
| 37 |                                                                                                                                                  |                    |          |                  |
| 38 | Impact of aldosterone synthase gene C-344T polymorphism on IgA nephropathy.                                                                      | Bantis C et al.    | 21476902 | No data for ACE2 |
| 39 |                                                                                                                                                  |                    |          |                  |
| 40 |                                                                                                                                                  |                    |          |                  |
| 41 |                                                                                                                                                  |                    |          |                  |
| 42 |                                                                                                                                                  |                    |          |                  |
| 43 |                                                                                                                                                  |                    |          |                  |
| 44 |                                                                                                                                                  |                    |          |                  |
| 45 |                                                                                                                                                  |                    |          |                  |
| 46 |                                                                                                                                                  |                    |          |                  |

|    |                                                                                                                              |                                                                                                                                            |                           |                  |                  |
|----|------------------------------------------------------------------------------------------------------------------------------|--------------------------------------------------------------------------------------------------------------------------------------------|---------------------------|------------------|------------------|
| 1  | Expression of CYP3A5 and P-glycoprotein in renal allografts with histological signs of calcineurin inhibitor nephrotoxicity. | Metalidis C et al.                                                                                                                         | 21544031                  | No data for ACE2 |                  |
| 2  |                                                                                                                              |                                                                                                                                            |                           |                  |                  |
| 3  |                                                                                                                              |                                                                                                                                            |                           |                  |                  |
| 4  |                                                                                                                              |                                                                                                                                            |                           |                  |                  |
| 5  | 1                                                                                                                            | Common variants in CNDP1 and CNDP2, and risk of nephropathy in type 2 diabetes.                                                            | Ahluwalia TS et al.       | 21573905         | No data for ACE2 |
| 6  |                                                                                                                              |                                                                                                                                            |                           |                  |                  |
| 7  | 1                                                                                                                            | Insertion/deletion polymorphism of the angiotensin-converting enzyme predicts left ventricular hypertrophy after renal transplantation.    | Fedor R et al.            | 21620105         | No data for ACE2 |
| 8  |                                                                                                                              |                                                                                                                                            |                           |                  |                  |
| 9  |                                                                                                                              |                                                                                                                                            |                           |                  |                  |
| 10 |                                                                                                                              |                                                                                                                                            |                           |                  |                  |
| 11 | 1                                                                                                                            | Polymorphisms of pon1 and pon2 genes in hemodialyzed patients.                                                                             | Rajkovic MG et al.        | 21620813         | No data for ACE2 |
| 12 |                                                                                                                              |                                                                                                                                            |                           |                  |                  |
| 13 | 1                                                                                                                            | A polymorphism of NADPH oxidase p22 phox is associated with reduced susceptibility to acute rejection in renal allograft recipients.       | Bhandary UV et al.        | 21624462         | No data for ACE2 |
| 14 |                                                                                                                              |                                                                                                                                            |                           |                  |                  |
| 15 | 1                                                                                                                            | Exome sequencing identified MYO1E and NEIL1 as candidate genes for human autosomal recessive steroid-resistant nephrotic syndrome.         | Sanna-Cherchi S et al.    | 21697813         | No data for ACE2 |
| 16 |                                                                                                                              |                                                                                                                                            |                           |                  |                  |
| 17 | 1                                                                                                                            | Differential effects of MYH9 and APOL1 risk variants on FRMD3 Association with Diabetic ESRD in African Americans.                         | Freedman BI et al.        | 21698141         | No data for ACE2 |
| 18 |                                                                                                                              |                                                                                                                                            |                           |                  |                  |
| 19 | 1                                                                                                                            | Influence of aldosterone synthase gene C-344T polymorphism on focal segmental glomerulosclerosis.                                          | Bantis C et al.           | 21777344         | No data for ACE2 |
| 20 |                                                                                                                              |                                                                                                                                            |                           |                  |                  |
| 21 | 1                                                                                                                            | Thiopurine S-methyltransferase polymorphism in Iranian kidney transplant recipients.                                                       | Aghdaie MH et al.         | 21819368         | No data for ACE2 |
| 22 |                                                                                                                              |                                                                                                                                            |                           |                  |                  |
| 23 | 1                                                                                                                            | Sickle cell trait is not independently associated with susceptibility to end-stage renal disease in African Americans.                     | Hicks PJ et al.           | 21849968         | No data for ACE2 |
| 24 |                                                                                                                              |                                                                                                                                            |                           |                  |                  |
| 25 | 1                                                                                                                            | Association between CYP3A5 polymorphisms and blood pressure in kidney transplant recipients receiving calcineurin inhibitors.              | Ferraresso M et al.       | 21851254         | No data for ACE2 |
| 26 |                                                                                                                              |                                                                                                                                            |                           |                  |                  |
| 27 | 1                                                                                                                            | Impact of nitric oxide synthase Glu298Asp polymorphism on the development of end-stage renal disease in type 2 diabetic Egyptian patients. | El-Din Bessa SS et al.    | 21854353         | No data for ACE2 |
| 28 |                                                                                                                              |                                                                                                                                            |                           |                  |                  |
| 29 | 1                                                                                                                            | Assessment of matrix Gla protein, Klotho gene polymorphisms, and oxidative stress in chronic kidney disease.                               | Karsli Ceppioglu S et al. | 21859400         | No data for ACE2 |
| 30 |                                                                                                                              |                                                                                                                                            |                           |                  |                  |
| 31 | 1                                                                                                                            | Influence of CYP3A5 and ABCB1 gene polymorphisms and other factors on tacrolimus dosing in Caucasian liver and kidney transplant patients. | Provenzani A et al.       | 21922127         | No data for ACE2 |
| 32 |                                                                                                                              |                                                                                                                                            |                           |                  |                  |
| 33 |                                                                                                                              |                                                                                                                                            |                           |                  |                  |
| 34 |                                                                                                                              |                                                                                                                                            |                           |                  |                  |
| 35 |                                                                                                                              |                                                                                                                                            |                           |                  |                  |
| 36 |                                                                                                                              |                                                                                                                                            |                           |                  |                  |
| 37 |                                                                                                                              |                                                                                                                                            |                           |                  |                  |
| 38 |                                                                                                                              |                                                                                                                                            |                           |                  |                  |
| 39 |                                                                                                                              |                                                                                                                                            |                           |                  |                  |
| 40 |                                                                                                                              |                                                                                                                                            |                           |                  |                  |
| 41 |                                                                                                                              |                                                                                                                                            |                           |                  |                  |
| 42 |                                                                                                                              |                                                                                                                                            |                           |                  |                  |
| 43 |                                                                                                                              |                                                                                                                                            |                           |                  |                  |
| 44 |                                                                                                                              |                                                                                                                                            |                           |                  |                  |
| 45 |                                                                                                                              |                                                                                                                                            |                           |                  |                  |
| 46 |                                                                                                                              |                                                                                                                                            |                           |                  |                  |

|    |                                                                                                                                                                                                             |                  |          |                  |
|----|-------------------------------------------------------------------------------------------------------------------------------------------------------------------------------------------------------------|------------------|----------|------------------|
| 1  | Interaction of MTHFR 1298C with ACE D allele augments the risk of diabetic nephropathy in Western Iran.                                                                                                     | Rahimi Z et al.  | 21942443 | No data for ACE2 |
| 2  |                                                                                                                                                                                                             |                  |          |                  |
| 3  |                                                                                                                                                                                                             |                  |          |                  |
| 4  |                                                                                                                                                                                                             |                  |          |                  |
| 5  |                                                                                                                                                                                                             |                  |          |                  |
| 6  | Association of genetic variants in the promoter region of genes encoding p22phox (CYBA) and glutamate cysteine ligase catalytic subunit (GCLC) and renal disease in patients with type 1 diabetes mellitus. | Vieira SM et al. | 21962117 | No data for ACE2 |
| 7  |                                                                                                                                                                                                             |                  |          |                  |
| 8  |                                                                                                                                                                                                             |                  |          |                  |
| 9  |                                                                                                                                                                                                             |                  |          |                  |
| 10 |                                                                                                                                                                                                             |                  |          |                  |
| 11 | Polymorphisms in MYH9 are associated with diabetic nephropathy in European Americans.                                                                                                                       | Cooke JN et al.  | 21968013 | No data for ACE2 |
| 12 |                                                                                                                                                                                                             |                  |          |                  |
| 13 | Angiotensin-converting enzyme (ACE) serum levels and gene polymorphism in Egyptian patients with systemic lupus erythematosus.                                                                              | Abbas D et al.   | 21976404 | No data for ACE2 |
| 14 |                                                                                                                                                                                                             |                  |          |                  |
| 15 | Association of eGFR-Related Loci Identified by GWAS with Incident CKD and ESRD.                                                                                                                             | Boger CA et al.  | 21980298 | No data for ACE2 |
| 16 |                                                                                                                                                                                                             |                  |          |                  |
| 17 | APOL1 variants increase risk for FSGS and HIVAN but not IgA nephropathy.                                                                                                                                    | Papeta N et al.  | 21997397 | No data for ACE2 |
| 18 |                                                                                                                                                                                                             |                  |          |                  |
| 19 |                                                                                                                                                                                                             |                  |          |                  |
| 20 |                                                                                                                                                                                                             |                  |          |                  |
| 21 | Genetic and functional effects of membrane metalloendopeptidase on diabetic nephropathy development.                                                                                                        | Zhang D et al.   | 22024547 | No data for ACE2 |
| 22 |                                                                                                                                                                                                             |                  |          |                  |
| 23 | The interactions of age, sex, body mass index, genetics, and steroid weight-based doses on tacrolimus dosing requirement after adult kidney transplantation.                                                | Stratta P et al. | 22101623 | No data for ACE2 |
| 24 |                                                                                                                                                                                                             |                  |          |                  |
| 25 |                                                                                                                                                                                                             |                  |          |                  |
| 26 |                                                                                                                                                                                                             |                  |          |                  |
| 27 | Genetic polymorphisms and the risk of progressive renal failure in elderly Hungarian patients.                                                                                                              | Zsom M et al.    | 22111818 | No data for ACE2 |
| 28 |                                                                                                                                                                                                             |                  |          |                  |
| 29 | Glutathione S-transferases T1 null genotype is associated with susceptibility to aristolochic acid nephropathy.                                                                                             | Chen B et al.    | 22116675 | No data for ACE2 |
| 30 |                                                                                                                                                                                                             |                  |          |                  |
| 31 |                                                                                                                                                                                                             |                  |          |                  |
| 32 | Nosocomial <i>Pneumocystis jirovecii</i> pneumonia: lessons from a cluster in kidney transplant recipients.                                                                                                 | Phipps LM et al. | 22129760 | No data for ACE2 |
| 33 |                                                                                                                                                                                                             |                  |          |                  |
| 34 | Gene polymorphisms of angiotensin-converting enzyme and angiotensin II type 1 receptor among chronic kidney disease patients in a Chinese population.                                                       | Su SL et al.     | 22147663 | No data for ACE2 |
| 35 |                                                                                                                                                                                                             |                  |          |                  |
| 36 |                                                                                                                                                                                                             |                  |          |                  |
| 37 |                                                                                                                                                                                                             |                  |          |                  |
| 38 | Clinical and genetic factors affecting tacrolimus trough levels and drug-related outcomes in Korean kidney transplant recipients.                                                                           | Kim IW et al.    | 22183771 | No data for ACE2 |
| 39 |                                                                                                                                                                                                             |                  |          |                  |
| 40 |                                                                                                                                                                                                             |                  |          |                  |
| 41 |                                                                                                                                                                                                             |                  |          |                  |
| 42 |                                                                                                                                                                                                             |                  |          |                  |
| 43 |                                                                                                                                                                                                             |                  |          |                  |
| 44 |                                                                                                                                                                                                             |                  |          |                  |
| 45 |                                                                                                                                                                                                             |                  |          |                  |
| 46 |                                                                                                                                                                                                             |                  |          |                  |

|    |                                                                                                                                              |                    |          |                  |
|----|----------------------------------------------------------------------------------------------------------------------------------------------|--------------------|----------|------------------|
| 1  | SIRTUIN 1 gene polymorphisms are associated with cholesterol metabolism and coronary artery calcification in Japanese hemodialysis patients. | Shimoyama Y et al. | 22200427 | No data for ACE2 |
| 2  |                                                                                                                                              |                    |          |                  |
| 3  |                                                                                                                                              |                    |          |                  |
| 4  |                                                                                                                                              |                    |          |                  |
| 5  |                                                                                                                                              |                    |          |                  |
| 6  |                                                                                                                                              |                    |          |                  |
| 7  |                                                                                                                                              |                    |          |                  |
| 8  |                                                                                                                                              |                    |          |                  |
| 9  |                                                                                                                                              |                    |          |                  |
| 10 |                                                                                                                                              |                    |          |                  |
| 11 |                                                                                                                                              |                    |          |                  |
| 12 |                                                                                                                                              |                    |          |                  |
| 13 |                                                                                                                                              |                    |          |                  |
| 14 |                                                                                                                                              |                    |          |                  |
| 15 |                                                                                                                                              |                    |          |                  |
| 16 |                                                                                                                                              |                    |          |                  |
| 17 |                                                                                                                                              |                    |          |                  |
| 18 |                                                                                                                                              |                    |          |                  |
| 19 |                                                                                                                                              |                    |          |                  |
| 20 |                                                                                                                                              |                    |          |                  |
| 21 |                                                                                                                                              |                    |          |                  |
| 22 |                                                                                                                                              |                    |          |                  |
| 23 |                                                                                                                                              |                    |          |                  |
| 24 |                                                                                                                                              |                    |          |                  |
| 25 |                                                                                                                                              |                    |          |                  |
| 26 |                                                                                                                                              |                    |          |                  |
| 27 |                                                                                                                                              |                    |          |                  |
| 28 |                                                                                                                                              |                    |          |                  |
| 29 |                                                                                                                                              |                    |          |                  |
| 30 |                                                                                                                                              |                    |          |                  |
| 31 |                                                                                                                                              |                    |          |                  |
| 32 |                                                                                                                                              |                    |          |                  |
| 33 |                                                                                                                                              |                    |          |                  |
| 34 |                                                                                                                                              |                    |          |                  |
| 35 |                                                                                                                                              |                    |          |                  |
| 36 |                                                                                                                                              |                    |          |                  |
| 37 |                                                                                                                                              |                    |          |                  |
| 38 |                                                                                                                                              |                    |          |                  |
| 39 |                                                                                                                                              |                    |          |                  |
| 40 |                                                                                                                                              |                    |          |                  |
| 41 |                                                                                                                                              |                    |          |                  |
| 42 |                                                                                                                                              |                    |          |                  |
| 43 |                                                                                                                                              |                    |          |                  |
| 44 |                                                                                                                                              |                    |          |                  |
| 45 |                                                                                                                                              |                    |          |                  |
| 46 |                                                                                                                                              |                    |          |                  |

|    |                                                                                                                                                               |                          |          |                  |
|----|---------------------------------------------------------------------------------------------------------------------------------------------------------------|--------------------------|----------|------------------|
| 1  | Genetic polymorphisms located in genes related to immune and inflammatory processes are associated with end-stage renal disease: a preliminary study.         | Jimenez-Sousa MA et al.  | 22817530 | No data for ACE2 |
| 2  |                                                                                                                                                               |                          |          |                  |
| 3  |                                                                                                                                                               |                          |          |                  |
| 4  |                                                                                                                                                               |                          |          |                  |
| 5  |                                                                                                                                                               |                          |          |                  |
| 6  | 1                                                                                                                                                             |                          |          |                  |
| 7  | Apolipoprotein L1 gene variants associate with hypertension-attributed nephropathy and the rate of kidney function decline in African Americans.              | Lipkowitz MS et al.      | 22832513 | No data for ACE2 |
| 8  |                                                                                                                                                               |                          |          |                  |
| 9  |                                                                                                                                                               |                          |          |                  |
| 10 |                                                                                                                                                               |                          |          |                  |
| 11 | 1                                                                                                                                                             |                          |          |                  |
| 12 | Donor age and ABCB1 1199G>A genetic polymorphism are independent factors affecting long-term renal function after kidney transplantation.                     | De Meyer M et al.        | 22835948 | No data for ACE2 |
| 13 |                                                                                                                                                               |                          |          |                  |
| 14 | 1                                                                                                                                                             |                          |          |                  |
| 15 | The effect of glutathione S-transferase polymorphisms and anti-GSTT1 antibodies on allograft functions in recipients of renal transplant.                     | Akgul SU et al.          | 22841242 | No data for ACE2 |
| 16 |                                                                                                                                                               |                          |          |                  |
| 17 | 1                                                                                                                                                             |                          |          |                  |
| 18 | Primary hyperoxaluria type 1, a too often missed diagnosis and potentially treatable cause of end-stage renal disease in adults: results of the Dutch cohort. | van der Hoeven SM et al. | 22844106 | No data for ACE2 |
| 19 |                                                                                                                                                               |                          |          |                  |
| 20 | 1                                                                                                                                                             |                          |          |                  |
| 21 | Genetic and functional analyses of MRAS and HNF1A genes in diabetes and diabetic nephropathy.                                                                 | Horova E et al.          | 22849862 | No data for ACE2 |
| 22 |                                                                                                                                                               |                          |          |                  |
| 23 | 1                                                                                                                                                             |                          |          |                  |
| 24 | Genetic variation in thrombin-activatable fibrinolysis inhibitor is associated with the risk of diabetic nephropathy.                                         | Xu CW et al.             | 22932273 | No data for ACE2 |
| 25 |                                                                                                                                                               |                          |          |                  |
| 26 | 1                                                                                                                                                             |                          |          |                  |
| 27 | Genetic variation in APOL1 and MYH9 genes is associated with chronic kidney disease among Nigerians.                                                          | Tayo BO et al.           | 22956460 | No data for ACE2 |
| 28 |                                                                                                                                                               |                          |          |                  |
| 29 | 1                                                                                                                                                             |                          |          |                  |
| 30 | Glutathione S-transferase A1, M1, P1 and T1 null or low-activity genotypes are associated with enhanced oxidative damage among haemodialysis patients.        | Suvakov S et al.         | 23034843 | No data for ACE2 |
| 31 |                                                                                                                                                               |                          |          |                  |
| 32 | 1                                                                                                                                                             |                          |          |                  |
| 33 | Association of vitamin D receptor FokI and Apal polymorphisms with human cytomegalovirus disease in the first three months following kidney transplantation.  | Zhao YG et al.           | 23044313 | No data for ACE2 |
| 34 |                                                                                                                                                               |                          |          |                  |
| 35 | 1                                                                                                                                                             |                          |          |                  |
| 36 | Vitamin D receptor gene BsmI, FokI, Apal and TaqI polymorphisms and the risk of systemic lupus erythematosus.                                                 | Mostowska A et al.       | 23065277 | No data for ACE2 |
| 37 |                                                                                                                                                               |                          |          |                  |
| 38 | 1                                                                                                                                                             |                          |          |                  |
| 39 | ACAC1 <sup>2</sup> gene (rs2268388) and AGTR1 gene (rs5186) polymorphism and the risk of nephropathy in Asian Indian patients with type 2 diabetes.           | Shah VN et al.           | 23081748 | No data for ACE2 |
| 40 |                                                                                                                                                               |                          |          |                  |
| 41 |                                                                                                                                                               |                          |          |                  |
| 42 |                                                                                                                                                               |                          |          |                  |
| 43 |                                                                                                                                                               |                          |          |                  |
| 44 |                                                                                                                                                               |                          |          |                  |
| 45 |                                                                                                                                                               |                          |          |                  |
| 46 |                                                                                                                                                               |                          |          |                  |

|    |                                                                                                             |                                                                                                                                                                                                                             |                          |                  |                  |
|----|-------------------------------------------------------------------------------------------------------------|-----------------------------------------------------------------------------------------------------------------------------------------------------------------------------------------------------------------------------|--------------------------|------------------|------------------|
| 1  | Chronic renal impairment and DDAH2-1151 A/C polymorphism determine ADMA levels in type 2 diabetic subjects. | Marra M et al.                                                                                                                                                                                                              | 23129820                 | No data for ACE2 |                  |
| 2  |                                                                                                             |                                                                                                                                                                                                                             |                          |                  |                  |
| 3  |                                                                                                             |                                                                                                                                                                                                                             |                          |                  |                  |
| 4  |                                                                                                             |                                                                                                                                                                                                                             |                          |                  |                  |
| 5  |                                                                                                             |                                                                                                                                                                                                                             |                          |                  |                  |
| 6  | 1                                                                                                           | Relationship of BsmI polymorphism of vitamin D receptor gene with left ventricular hypertrophy and atherosclerosis in hemodialysis patients.                                                                                | El-Shehaby AM et al.     | 23198772         | No data for ACE2 |
| 7  |                                                                                                             |                                                                                                                                                                                                                             |                          |                  |                  |
| 8  |                                                                                                             |                                                                                                                                                                                                                             |                          |                  |                  |
| 9  | 1                                                                                                           | CYP3A4 genetic polymorphisms predict cyclosporine-related clinical events in Chinese renal transplant recipients.                                                                                                           | Wang YY et al.           | 23217392         | No data for ACE2 |
| 10 |                                                                                                             |                                                                                                                                                                                                                             |                          |                  |                  |
| 11 |                                                                                                             |                                                                                                                                                                                                                             |                          |                  |                  |
| 12 | 1                                                                                                           | Clinical impact of an angiotensin I-converting enzyme insertion/deletion and kinin B2 receptor +9/-9 polymorphisms in the prognosis of renal transplantation.                                                               | Amorim CE et al.         | 23362199         | No data for ACE2 |
| 13 |                                                                                                             |                                                                                                                                                                                                                             |                          |                  |                  |
| 14 |                                                                                                             |                                                                                                                                                                                                                             |                          |                  |                  |
| 15 | 1                                                                                                           | The A736V TMPRSS6 polymorphism influences hepcidin and iron metabolism in chronic hemodialysis patients: TMPRSS6 and hepcidin in hemodialysis.                                                                              | Pelusi S et al.          | 23433094         | No data for ACE2 |
| 16 |                                                                                                             |                                                                                                                                                                                                                             |                          |                  |                  |
| 17 |                                                                                                             |                                                                                                                                                                                                                             |                          |                  |                  |
| 18 | 1                                                                                                           | Identification of chromosome 3q28 and ALPK1 as susceptibility loci for chronic kidney disease in Japanese individuals by a genome-wide association study.                                                                   | Yamada Y et al.          | 23539754         | No data for ACE2 |
| 19 |                                                                                                             |                                                                                                                                                                                                                             |                          |                  |                  |
| 20 |                                                                                                             |                                                                                                                                                                                                                             |                          |                  |                  |
| 21 | 1                                                                                                           | Replication study for the association of 3 SNP loci identified in a genome-wide association study for diabetic nephropathy in European type 1 diabetes with diabetic nephropathy in Japanese patients with type 2 diabetes. | Maeda S et al.           | 23543049         | No data for ACE2 |
| 22 |                                                                                                             |                                                                                                                                                                                                                             |                          |                  |                  |
| 23 |                                                                                                             |                                                                                                                                                                                                                             |                          |                  |                  |
| 24 | 1                                                                                                           | eNOS 4a/b polymorphism and its interaction with eNOS G894T variants in type 2 diabetes mellitus: modifying the risk of diabetic nephropathy.                                                                                | Rahimi Z et al.          | 23594559         | No data for ACE2 |
| 25 |                                                                                                             |                                                                                                                                                                                                                             |                          |                  |                  |
| 26 |                                                                                                             |                                                                                                                                                                                                                             |                          |                  |                  |
| 27 | 1                                                                                                           | Association of CYP1A1 gene polymorphism with chronic kidney disease: a case control study.                                                                                                                                  | Siddarth M et al.        | 23619522         | No data for ACE2 |
| 28 |                                                                                                             |                                                                                                                                                                                                                             |                          |                  |                  |
| 29 | 1                                                                                                           | Influence of GSTO2 (N142D) genetic polymorphism on acute renal rejection.                                                                                                                                                   | Nekooie-Marnany N et al. | 23649768         | No data for ACE2 |
| 30 |                                                                                                             |                                                                                                                                                                                                                             |                          |                  |                  |
| 31 |                                                                                                             |                                                                                                                                                                                                                             |                          |                  |                  |
| 32 | 1                                                                                                           | Association of aldosterone synthase (CYP11B2) gene -344T/C polymorphism with the risk of primary chronic glomerulonephritis in the Polish population.                                                                       | Pawlik M et al.          | 23681285         | No data for ACE2 |
| 33 |                                                                                                             |                                                                                                                                                                                                                             |                          |                  |                  |
| 34 |                                                                                                             |                                                                                                                                                                                                                             |                          |                  |                  |
| 35 | 1                                                                                                           | Association of POL1, MALT1, MC4R, PHLPP and DSEL single nucleotide polymorphisms in chromosome 18q region with type 2 diabetes in Tunisians.                                                                                | Turki A et al.           | 23727064         | No data for ACE2 |
| 36 |                                                                                                             |                                                                                                                                                                                                                             |                          |                  |                  |
| 37 |                                                                                                             |                                                                                                                                                                                                                             |                          |                  |                  |
| 38 |                                                                                                             |                                                                                                                                                                                                                             |                          |                  |                  |
| 39 |                                                                                                             |                                                                                                                                                                                                                             |                          |                  |                  |
| 40 |                                                                                                             |                                                                                                                                                                                                                             |                          |                  |                  |
| 41 |                                                                                                             |                                                                                                                                                                                                                             |                          |                  |                  |
| 42 |                                                                                                             |                                                                                                                                                                                                                             |                          |                  |                  |
| 43 |                                                                                                             |                                                                                                                                                                                                                             |                          |                  |                  |
| 44 |                                                                                                             |                                                                                                                                                                                                                             |                          |                  |                  |
| 45 |                                                                                                             |                                                                                                                                                                                                                             |                          |                  |                  |
| 46 |                                                                                                             |                                                                                                                                                                                                                             |                          |                  |                  |



|    |                                                                                                        |                                                                                                                                                             |                           |                  |                  |
|----|--------------------------------------------------------------------------------------------------------|-------------------------------------------------------------------------------------------------------------------------------------------------------------|---------------------------|------------------|------------------|
| 1  | ADAMTS13 predicts renal and cardiovascular events in type 2 diabetic patients and response to therapy. | Rurali E et al.                                                                                                                                             | 23733198                  | No data for ACE2 |                  |
| 2  |                                                                                                        |                                                                                                                                                             |                           |                  |                  |
| 3  |                                                                                                        |                                                                                                                                                             |                           |                  |                  |
| 4  |                                                                                                        |                                                                                                                                                             |                           |                  |                  |
| 5  |                                                                                                        |                                                                                                                                                             |                           |                  |                  |
| 6  | 1                                                                                                      | Characterization of three vasopressin receptor 2 variants: an apparent polymorphism (V266A) and two loss-of-function mutations (R181C and M311V).           | Armstrong SP et al.       | 23762448         | No data for ACE2 |
| 7  |                                                                                                        |                                                                                                                                                             |                           |                  |                  |
| 8  |                                                                                                        |                                                                                                                                                             |                           |                  |                  |
| 9  |                                                                                                        |                                                                                                                                                             |                           |                  |                  |
| 10 | 1                                                                                                      | Distribution of dimethylarginine-dimethylaminohydrolase-II (DDAH2) gene polymorphism in hemodialysis patients.                                              | Thaha M et al.            | 23770786         | No data for ACE2 |
| 11 |                                                                                                        |                                                                                                                                                             |                           |                  |                  |
| 12 | 1                                                                                                      | Genetic predisposition for development of nephropathy in type 2 diabetes mellitus.                                                                          | Kumar R et al.            | 23846111         | No data for ACE2 |
| 13 |                                                                                                        |                                                                                                                                                             |                           |                  |                  |
| 14 | 1                                                                                                      | CYP2C9 and ABCG2 polymorphisms as risk factors for developing adverse drug reactions in renal transplant patients taking fluvastatin: a case-control study. | Mirosevic Skvrce N et al. | 24024895         | No data for ACE2 |
| 15 |                                                                                                        |                                                                                                                                                             |                           |                  |                  |
| 16 | 1                                                                                                      | Impact of CYP3A5 genotype on tacrolimus versus midazolam clearance in renal transplant recipients: new insights in CYP3A5-mediated drug metabolism.         | de Jonge H et al.         | 24024898         | No data for ACE2 |
| 17 |                                                                                                        |                                                                                                                                                             |                           |                  |                  |
| 18 | 1                                                                                                      | Suppressed soluble Fms-like tyrosine kinase-1 production aggravates atherosclerosis in chronic kidney disease.                                              | Matsui M et al.           | 24048373         | No data for ACE2 |
| 19 |                                                                                                        |                                                                                                                                                             |                           |                  |                  |
| 20 | 1                                                                                                      | Impact of CYP3A4*22 allele on tacrolimus pharmacokinetics in early period after renal transplantation: toward updated genotype-based dosage guidelines.     | Elens L et al.            | 24052064         | No data for ACE2 |
| 21 |                                                                                                        |                                                                                                                                                             |                           |                  |                  |
| 22 | 1                                                                                                      | Association of TNF- $\alpha$ -308 G > A and ACE I/D gene polymorphisms in hemodialysis patients with arteriovenous fistula thrombosis.                      | Sener EF et al.           | 24126814         | No data for ACE2 |
| 23 |                                                                                                        |                                                                                                                                                             |                           |                  |                  |
| 24 | 1                                                                                                      | Association of E-selectin gene polymorphism and serum PAPP-A with carotid atherosclerosis in end-stage renal disease.                                       | Issac MS et al.           | 24151105         | No data for ACE2 |
| 25 |                                                                                                        |                                                                                                                                                             |                           |                  |                  |
| 26 | 1                                                                                                      | MYH9-related disease: a novel prognostic model to predict the clinical evolution of the disease based on genotype-phenotype correlations.                   | Pecci A et al.            | 24186861         | No data for ACE2 |
| 27 |                                                                                                        |                                                                                                                                                             |                           |                  |                  |
| 28 | 1                                                                                                      | Increased level of organochlorine pesticides in chronic kidney disease patients of unknown etiology: role of GSTM1/GSTT1 polymorphism.                      | Siddarth M et al.         | 24216264         | No data for ACE2 |
| 29 |                                                                                                        |                                                                                                                                                             |                           |                  |                  |
| 30 |                                                                                                        |                                                                                                                                                             |                           |                  |                  |
| 31 |                                                                                                        |                                                                                                                                                             |                           |                  |                  |
| 32 |                                                                                                        |                                                                                                                                                             |                           |                  |                  |
| 33 |                                                                                                        |                                                                                                                                                             |                           |                  |                  |
| 34 |                                                                                                        |                                                                                                                                                             |                           |                  |                  |
| 35 |                                                                                                        |                                                                                                                                                             |                           |                  |                  |
| 36 |                                                                                                        |                                                                                                                                                             |                           |                  |                  |
| 37 |                                                                                                        |                                                                                                                                                             |                           |                  |                  |
| 38 |                                                                                                        |                                                                                                                                                             |                           |                  |                  |
| 39 |                                                                                                        |                                                                                                                                                             |                           |                  |                  |
| 40 |                                                                                                        |                                                                                                                                                             |                           |                  |                  |
| 41 |                                                                                                        |                                                                                                                                                             |                           |                  |                  |
| 42 |                                                                                                        |                                                                                                                                                             |                           |                  |                  |
| 43 |                                                                                                        |                                                                                                                                                             |                           |                  |                  |
| 44 |                                                                                                        |                                                                                                                                                             |                           |                  |                  |
| 45 |                                                                                                        |                                                                                                                                                             |                           |                  |                  |
| 46 |                                                                                                        |                                                                                                                                                             |                           |                  |                  |



|    |   |                                                                                                                                                                                                            |                      |          |                  |
|----|---|------------------------------------------------------------------------------------------------------------------------------------------------------------------------------------------------------------|----------------------|----------|------------------|
| 1  | 1 | An integrative study of the genetic, social and environmental determinants of chronic kidney disease characterized by tubulointerstitial damages in the North Central Region of Sri Lanka.                 | Nanayakkara S et al. | 24351856 | No data for ACE2 |
| 2  | 1 | Immune response following liver transplantation compared to kidney transplantation: usefulness of monitoring peripheral blood CD4+ adenosine triphosphate activity and cytochrome P450 3A5 genotype assay. | Nobuoka Y et al.     | 24454479 | No data for ACE2 |
| 3  | 1 | Relationship of CYP3A5 genotype and ABCB1 diplotype to tacrolimus disposition in Brazilian kidney transplant patients.                                                                                     | Cusinato DA et al.   | 24528196 | No data for ACE2 |
| 4  | 1 | Evaluation of candidate nephropathy susceptibility genes in a genome-wide association study of African American diabetic kidney disease.                                                                   | Palmer ND et al.     | 24551085 | No data for ACE2 |
| 5  | 1 | Identification of novel mutations of PKD1 gene in Chinese patients with autosomal dominant polycystic kidney disease by targeted next-generation sequencing.                                               | Yang T et al.        | 24582653 | No data for ACE2 |
| 6  | 1 | Association of BH3 interacting domain death agonist (BID) gene polymorphisms with proteinuria of immunoglobulin A nephropathy.                                                                             | Park HJ et al.       | 24621205 | No data for ACE2 |
| 7  | 1 | Association studies of cytochrome P450, family 2, subfamily E, polypeptide 1 (CYP2E1) gene polymorphisms with acute rejection in kidney transplantation recipients.                                        | Kim SK et al.        | 24654912 | No data for ACE2 |
| 8  | 1 | MYH9 and APOL1 gene polymorphisms and the risk of CKD in patients with lupus nephritis from an admixture population.                                                                                       | Colares VS et al.    | 24658608 | No data for ACE2 |
| 9  | 1 | Cys327Cys polymorphism of the PAPP-A gene (pregnancy associated plasma protein A) is related to mortality of long term hemodialysis patients.                                                              | Kalousova M et al.   | 24667032 | No data for ACE2 |
| 10 | 1 | Genes involved in the regulation of vascular homeostasis determine renal survival rate in patients with chronic glomerulonephritis.                                                                        | Litovkina O et al.   | 24727057 | No data for ACE2 |
| 11 | 1 | Lack of serologic evidence to link IgA nephropathy with celiac disease or immune reactivity to gluten.                                                                                                     | Moeller S et al.     | 24732864 | No data for ACE2 |
| 12 | 1 | Genetic variants of ACE (Insertion/Deletion) and AGT (M268T) genes in patients with diabetes and nephropathy.                                                                                              | Shaikh R et al.      | 24737640 | No data for ACE2 |

|    |                                                                                                                                                                                                        |                                                                                                                                                                                                                                          |                         |                  |                  |
|----|--------------------------------------------------------------------------------------------------------------------------------------------------------------------------------------------------------|------------------------------------------------------------------------------------------------------------------------------------------------------------------------------------------------------------------------------------------|-------------------------|------------------|------------------|
| 1  | Single nucleotide polymorphisms at erythropoietin, superoxide dismutase 1, splicing factor, arginine/serin-rich 15 and plasmacytoma variant translocation genes association with diabetic nephropathy. | Alwohhaib M et al.                                                                                                                                                                                                                       | 24821155                | No data for ACE2 |                  |
| 2  |                                                                                                                                                                                                        |                                                                                                                                                                                                                                          |                         |                  |                  |
| 3  |                                                                                                                                                                                                        |                                                                                                                                                                                                                                          |                         |                  |                  |
| 4  |                                                                                                                                                                                                        |                                                                                                                                                                                                                                          |                         |                  |                  |
| 5  |                                                                                                                                                                                                        |                                                                                                                                                                                                                                          |                         |                  |                  |
| 6  | 1                                                                                                                                                                                                      |                                                                                                                                                                                                                                          |                         |                  |                  |
| 7  |                                                                                                                                                                                                        |                                                                                                                                                                                                                                          |                         |                  |                  |
| 8  | 1                                                                                                                                                                                                      | NOS3 tagSNPs does not modify the chronic kidney disease progression in autosomal dominant polycystic kidney disease.                                                                                                                     | Ramanathan G et al.     | 24824375         | No data for ACE2 |
| 9  |                                                                                                                                                                                                        |                                                                                                                                                                                                                                          |                         |                  |                  |
| 10 |                                                                                                                                                                                                        |                                                                                                                                                                                                                                          |                         |                  |                  |
| 11 | 1                                                                                                                                                                                                      | Renin-angiotensin-aldosterone system related gene polymorphisms and urinary total arsenic is related to chronic kidney disease.                                                                                                          | Chen WJ et al.          | 24907556         | No data for ACE2 |
| 12 |                                                                                                                                                                                                        |                                                                                                                                                                                                                                          |                         |                  |                  |
| 13 |                                                                                                                                                                                                        |                                                                                                                                                                                                                                          |                         |                  |                  |
| 14 | 1                                                                                                                                                                                                      | Gene-gene interactions in renin-angiotensin-aldosterone system contributes to end-stage renal disease susceptibility in a Han Chinese population.                                                                                        | Su SL et al.            | 24977181         | No data for ACE2 |
| 15 |                                                                                                                                                                                                        |                                                                                                                                                                                                                                          |                         |                  |                  |
| 16 | 1                                                                                                                                                                                                      | Polymorphisms in oxidative stress pathway genes and risk of diabetic nephropathy in South Indian type 2 diabetic patients.                                                                                                               | Narne P et al.          | 25041504         | No data for ACE2 |
| 17 |                                                                                                                                                                                                        |                                                                                                                                                                                                                                          |                         |                  |                  |
| 18 |                                                                                                                                                                                                        |                                                                                                                                                                                                                                          |                         |                  |                  |
| 19 | 1                                                                                                                                                                                                      | Rare mutations associating with serum creatinine and chronic kidney disease.                                                                                                                                                             | Sveinbjornsson G et al. | 25082825         | No data for ACE2 |
| 20 |                                                                                                                                                                                                        |                                                                                                                                                                                                                                          |                         |                  |                  |
| 21 |                                                                                                                                                                                                        |                                                                                                                                                                                                                                          |                         |                  |                  |
| 22 | 1                                                                                                                                                                                                      | Is increased susceptibility to Balkan endemic nephropathy in carriers of common GSTA1 (*A/*B) polymorphism linked with the catalytic role of GSTA1 in ochratoxin a biotransformation? Serbian case control study and in silico analysis. | Reljic Z et al.         | 25111321         | No data for ACE2 |
| 23 |                                                                                                                                                                                                        |                                                                                                                                                                                                                                          |                         |                  |                  |
| 24 |                                                                                                                                                                                                        |                                                                                                                                                                                                                                          |                         |                  |                  |
| 25 |                                                                                                                                                                                                        |                                                                                                                                                                                                                                          |                         |                  |                  |
| 26 | 1                                                                                                                                                                                                      | Association between genetic polymorphisms of ACE & eNOS and diabetic nephropathy.                                                                                                                                                        | Huo P et al.            | 25227524         | No data for ACE2 |
| 27 |                                                                                                                                                                                                        |                                                                                                                                                                                                                                          |                         |                  |                  |
| 28 |                                                                                                                                                                                                        |                                                                                                                                                                                                                                          |                         |                  |                  |
| 29 | 1                                                                                                                                                                                                      | DNA repair genes XPD and XRCC1 polymorphisms and risk of end-stage renal disease in Egyptian population.                                                                                                                                 | Radwan WM et al.        | 25310768         | No data for ACE2 |
| 30 |                                                                                                                                                                                                        |                                                                                                                                                                                                                                          |                         |                  |                  |
| 31 | 1                                                                                                                                                                                                      | Clinical utility of chitotriosidase enzyme activity in nephropathic cystinosis.                                                                                                                                                          | Elmonem MA et al.       | 25407738         | No data for ACE2 |
| 32 |                                                                                                                                                                                                        |                                                                                                                                                                                                                                          |                         |                  |                  |
| 33 |                                                                                                                                                                                                        |                                                                                                                                                                                                                                          |                         |                  |                  |
| 34 | 1                                                                                                                                                                                                      | Synergism between asymmetric dimethylarginine (ADMA) and a genetic marker of uric acid in CKD progression.                                                                                                                               | Testa A et al.          | 25435339         | No data for ACE2 |
| 35 |                                                                                                                                                                                                        |                                                                                                                                                                                                                                          |                         |                  |                  |
| 36 | 1                                                                                                                                                                                                      | The functional Q84R polymorphism of TRIB3 gene is associated with diabetic nephropathy in Chinese type 2 diabetic patients.                                                                                                              | Zhang W et al.          | 25447894         | No data for ACE2 |
| 37 |                                                                                                                                                                                                        |                                                                                                                                                                                                                                          |                         |                  |                  |
| 38 |                                                                                                                                                                                                        |                                                                                                                                                                                                                                          |                         |                  |                  |
| 39 |                                                                                                                                                                                                        |                                                                                                                                                                                                                                          |                         |                  |                  |
| 40 |                                                                                                                                                                                                        |                                                                                                                                                                                                                                          |                         |                  |                  |
| 41 |                                                                                                                                                                                                        |                                                                                                                                                                                                                                          |                         |                  |                  |
| 42 |                                                                                                                                                                                                        |                                                                                                                                                                                                                                          |                         |                  |                  |
| 43 |                                                                                                                                                                                                        |                                                                                                                                                                                                                                          |                         |                  |                  |
| 44 |                                                                                                                                                                                                        |                                                                                                                                                                                                                                          |                         |                  |                  |
| 45 |                                                                                                                                                                                                        |                                                                                                                                                                                                                                          |                         |                  |                  |
| 46 |                                                                                                                                                                                                        |                                                                                                                                                                                                                                          |                         |                  |                  |

|    |   |                                                                                                                                                            |                         |          |                  |
|----|---|------------------------------------------------------------------------------------------------------------------------------------------------------------|-------------------------|----------|------------------|
| 1  | 1 | Circulating angiotensin-converting enzyme 2 activity in patients with chronic kidney disease without previous history of cardiovascular disease            | Anguiano L et al.       | 25813276 | No data for ACE2 |
| 2  | 1 | Allelic variations in the CYBA gene of NADPH oxidase and risk of kidney complications in patients with type 1 diabetes.                                    | Patente TA et al.       | 25862415 | No data for ACE2 |
| 3  | 1 | Associations between INSR and MTOR polymorphisms in type 2 diabetes mellitus and diabetic nephropathy in a Northeast Chinese Han population.               | Zhu AN et al.           | 25867326 | No data for ACE2 |
| 4  | 1 | Polymorphism of the CYP3A5 gene and its effect on tacrolimus blood level.                                                                                  | Nair SS et al.          | 25894154 | No data for ACE2 |
| 5  | 1 | Copy Number Variation at the APOL1 Locus.                                                                                                                  | Ruchi R et al.          | 25933006 | No data for ACE2 |
| 6  | 1 | Aldosterone Synthase CYP11B2 Gene Promoter Polymorphism in a Turkish Population With Chronic Kidney Disease.                                               | Yilmaz M et al.         | 25957425 | No data for ACE2 |
| 7  | 1 | Is Klotho F352V Polymorphism the Missing Piece of the Bone Loss Puzzle in Renal Transplant Recipients?                                                     | Ozdem S et al.          | 26022923 | No data for ACE2 |
| 8  | 1 | Identification of new susceptibility loci for IgA nephropathy in Han Chinese.                                                                              | Li M et al.             | 26028593 | No data for ACE2 |
| 9  | 1 | Association between C1GALT1 variants and genetic susceptibility to IgA nephropathy in Uygur.                                                               | Li WL et al.            | 26125729 | No data for ACE2 |
| 10 | 1 | Estimated glomerular filtration rate (eGFR), 25(OH) D3, chronic kidney disease (CKD), the MYH9 (myosin heavy chain 9) gene in old and very elderly people. | Otero Gonzalez A et al. | 26152646 | No data for ACE2 |
| 11 | 1 | Influence of genetic variability at the ACE locus in intron 16 on Diabetic Nephropathy in T1DM patients.                                                   | Parchwani DN et al.     | 26214998 | No data for ACE2 |
| 12 | 1 | How to handle missed or delayed doses of tacrolimus in renal transplant recipients? A pharmacokinetic investigation.                                       | Saint-Marcoux F et al.  | 26316426 | No data for ACE2 |
| 13 | 1 | Re-Sequencing of the APOL1-APOL4 and MYH9 Gene Regions in African Americans Does Not Identify Additional Risks for CKD Progression.                        | Hawkins GA et al.       | 26343748 | No data for ACE2 |

|    |                                                                                                                                                                               |                         |          |                  |
|----|-------------------------------------------------------------------------------------------------------------------------------------------------------------------------------|-------------------------|----------|------------------|
| 1  | Prevalence of angiotensin converting enzyme (ACE) gene insertion/deletion polymorphism in South Indian population with hypertension and chronic kidney disease.               | Shanmuganathan R et al. | 26440392 | No data for ACE2 |
| 2  |                                                                                                                                                                               |                         |          |                  |
| 3  |                                                                                                                                                                               |                         |          |                  |
| 4  |                                                                                                                                                                               |                         |          |                  |
| 5  |                                                                                                                                                                               |                         |          |                  |
| 6  | 1                                                                                                                                                                             |                         |          |                  |
| 7  | RAGE and CYBA polymorphisms are associated with microalbuminuria and end-stage renal disease onset in a cohort of type 1 diabetes mellitus patients over a 20-year follow-up. | Franko B et al.         | 26607824 | No data for ACE2 |
| 8  |                                                                                                                                                                               |                         |          |                  |
| 9  |                                                                                                                                                                               |                         |          |                  |
| 10 | 1                                                                                                                                                                             |                         |          |                  |
| 11 | Polymorphisms in NADPH oxidase CYBA gene modify the risk of ESRD in patients with chronic glomerulonephritis.                                                                 | Zhou H et al.           | 26627442 | No data for ACE2 |
| 12 |                                                                                                                                                                               |                         |          |                  |
| 13 |                                                                                                                                                                               |                         |          |                  |
| 14 | 1                                                                                                                                                                             |                         |          |                  |
| 15 | Impact of CYP3A5 polymorphism on trough concentrations and outcomes of tacrolimus minimization during the early period after kidney transplantation.                          | Yaowakulpatana K et al. | 26635230 | No data for ACE2 |
| 16 |                                                                                                                                                                               |                         |          |                  |
| 17 | 1                                                                                                                                                                             |                         |          |                  |
| 18 | Relationship between rs1047763 polymorphism of the C1GALT1 gene and susceptibility to immunoglobulin A nephropathy in Xinjiang Uyghur people.                                 | Xue JN et al.           | 26782518 | No data for ACE2 |
| 19 |                                                                                                                                                                               |                         |          |                  |
| 20 | 1                                                                                                                                                                             |                         |          |                  |
| 21 | Manganese superoxide dismutase, glutathione peroxidase and catalase gene polymorphisms and clinical outcomes in acute kidney injury.                                          | Kidir V et al.          | 26787049 | No data for ACE2 |
| 22 |                                                                                                                                                                               |                         |          |                  |
| 23 | 1                                                                                                                                                                             |                         |          |                  |
| 24 | Genetic analysis and functional characterization of novel mutations in a series of patients with atypical hemolytic uremic syndrome.                                          | Szarvas N et al.        | 26826462 | No data for ACE2 |
| 25 |                                                                                                                                                                               |                         |          |                  |
| 26 | 1                                                                                                                                                                             |                         |          |                  |
| 27 | A Lack of Significant Effect of POR*28 Allelic Variant on Tacrolimus Exposure in Kidney Transplant Recipients.                                                                | Jannot AS et al.        | 26829596 | No data for ACE2 |
| 28 |                                                                                                                                                                               |                         |          |                  |
| 29 | 1                                                                                                                                                                             |                         |          |                  |
| 30 | Association of RAC1 Gene Polymorphisms with Primary End-Stage Renal Disease in Chinese Renal Recipients.                                                                      | Liu Y et al.            | 26841219 | No data for ACE2 |
| 31 |                                                                                                                                                                               |                         |          |                  |
| 32 | 1                                                                                                                                                                             |                         |          |                  |
| 33 | Nodular glomerulosclerosis and renin angiotensin system in Chinese patients with type 2 diabetes                                                                              | Wang M et al.           | 26973293 | No data for ACE2 |
| 34 |                                                                                                                                                                               |                         |          |                  |
| 35 | 1                                                                                                                                                                             |                         |          |                  |
| 36 | Genome-Wide Association Study of Acute Renal Graft Rejection.                                                                                                                 | Ghisdal L et al.        | 27272414 | No data for ACE2 |
| 37 |                                                                                                                                                                               |                         |          |                  |
| 38 | 1                                                                                                                                                                             |                         |          |                  |
| 39 | The angiotensin-I converting enzyme gene I/D variation contributes to end-stage renal disease risk in Chinese patients with type 2 diabetes receiving hemodialysis.           | Lu M et al.             | 27633502 | No data for ACE2 |
| 40 |                                                                                                                                                                               |                         |          |                  |
| 41 |                                                                                                                                                                               |                         |          |                  |
| 42 |                                                                                                                                                                               |                         |          |                  |
| 43 |                                                                                                                                                                               |                         |          |                  |
| 44 |                                                                                                                                                                               |                         |          |                  |
| 45 |                                                                                                                                                                               |                         |          |                  |
| 46 |                                                                                                                                                                               |                         |          |                  |

|    |                                                                                                          |                                                                                                                                                                                       |                        |                  |                  |
|----|----------------------------------------------------------------------------------------------------------|---------------------------------------------------------------------------------------------------------------------------------------------------------------------------------------|------------------------|------------------|------------------|
| 1  | Pin1 and secondary hyperparathyroidism of chronic kidney disease: gene polymorphisms and protein levels. | Zhao Y et al.                                                                                                                                                                         | 27876426               | No data for ACE2 |                  |
| 2  |                                                                                                          |                                                                                                                                                                                       |                        |                  |                  |
| 3  |                                                                                                          |                                                                                                                                                                                       |                        |                  |                  |
| 4  |                                                                                                          |                                                                                                                                                                                       |                        |                  |                  |
| 5  |                                                                                                          |                                                                                                                                                                                       |                        |                  |                  |
| 6  | 1                                                                                                        | Lysine 63 ubiquitination is involved in the progression of tubular damage in diabetic nephropathy.                                                                                    | Pontrelli P et al.     | 27881486         | No data for ACE2 |
| 7  |                                                                                                          |                                                                                                                                                                                       |                        |                  |                  |
| 8  |                                                                                                          |                                                                                                                                                                                       |                        |                  |                  |
| 9  | 1                                                                                                        | Mutational Analysis of Agxt in Tunisian Population with Primary Hyperoxaluria Type 1.                                                                                                 | M'dimegh S et al.      | 27935012         | No data for ACE2 |
| 10 |                                                                                                          |                                                                                                                                                                                       |                        |                  |                  |
| 11 | 1                                                                                                        | Mutation screening of ACKR3 and COPS8 in kidney cancer cases from the CONFIRM study.                                                                                                  | Mahmoodi M et al.      | 28063109         | No data for ACE2 |
| 12 |                                                                                                          |                                                                                                                                                                                       |                        |                  |                  |
| 13 | 1                                                                                                        | Glutathione Peroxidase 1 Gene Polymorphism in Nephrolithiasis Patients From South of Iran.                                                                                            | Aghakhani R et al.     | 28174350         | No data for ACE2 |
| 14 |                                                                                                          |                                                                                                                                                                                       |                        |                  |                  |
| 15 | 1                                                                                                        | Association of MMP-9 gene polymorphisms with nephrolithiasis patients.                                                                                                                | Mehde AA et al.        | 28205286         | No data for ACE2 |
| 16 |                                                                                                          |                                                                                                                                                                                       |                        |                  |                  |
| 17 | 1                                                                                                        | Galactosylation of IgA1 Is Associated with Common Variation in C1GALT1.                                                                                                               | Gale DP et al.         | 28209808         | No data for ACE2 |
| 18 |                                                                                                          |                                                                                                                                                                                       |                        |                  |                  |
| 19 | 1                                                                                                        | Relationship of Serum Klotho Level With ACE Gene Polymorphism in Stable Kidney Allograft Recipients.                                                                                  | Zaare Nahandi M et al. | 28270648         | No data for ACE2 |
| 20 |                                                                                                          |                                                                                                                                                                                       |                        |                  |                  |
| 21 | 1                                                                                                        | GSTM1 genotype is an independent prognostic factor in clear cell renal cell carcinoma.                                                                                                | Coric VM et al.        | 28284893         | No data for ACE2 |
| 22 |                                                                                                          |                                                                                                                                                                                       |                        |                  |                  |
| 23 | 1                                                                                                        | Effect of AMP-activated protein kinase subunit alpha 2 (PRKAA2) genetic polymorphisms on susceptibility to type 2 diabetes mellitus and diabetic nephropathy in a Chinese population. | Li Q et al.            | 28322508         | No data for ACE2 |
| 24 |                                                                                                          |                                                                                                                                                                                       |                        |                  |                  |
| 25 | 1                                                                                                        | Transcriptional Coactivator p300 and Silent Information Regulator 1 (SIRT1) Gene Polymorphism Associated with Diabetic Kidney Disease in a Chinese Cohort.                            | Tang K et al.          | 28444663         | No data for ACE2 |
| 26 |                                                                                                          |                                                                                                                                                                                       |                        |                  |                  |
| 27 | 1                                                                                                        | Association of polymorphic variants of PTPN22, TNF and VDR genes in children with lupus nephritis: A study in Colombian family triads.                                                | Garavito G et al.      | 28527290         | No data for ACE2 |
| 28 |                                                                                                          |                                                                                                                                                                                       |                        |                  |                  |
| 29 | 1                                                                                                        | The Contribution of MMP-7 Promoter Polymorphisms in Renal Cell Carcinoma.                                                                                                             | Liao CH et al.         | 28652430         | No data for ACE2 |
| 30 |                                                                                                          |                                                                                                                                                                                       |                        |                  |                  |
| 31 | 1                                                                                                        | MDR-1 and CYP3A5 Polymorphisms in Pediatric Idiopathic Nephrotic Syndrome: Impact on Susceptibility and Response to Steroids (Preliminary Results).                                   | Moussa A et al.        | 28792718         | No data for ACE2 |
| 32 |                                                                                                          |                                                                                                                                                                                       |                        |                  |                  |
| 33 |                                                                                                          |                                                                                                                                                                                       |                        |                  |                  |
| 34 |                                                                                                          |                                                                                                                                                                                       |                        |                  |                  |
| 35 |                                                                                                          |                                                                                                                                                                                       |                        |                  |                  |
| 36 |                                                                                                          |                                                                                                                                                                                       |                        |                  |                  |
| 37 |                                                                                                          |                                                                                                                                                                                       |                        |                  |                  |
| 38 |                                                                                                          |                                                                                                                                                                                       |                        |                  |                  |
| 39 |                                                                                                          |                                                                                                                                                                                       |                        |                  |                  |
| 40 |                                                                                                          |                                                                                                                                                                                       |                        |                  |                  |
| 41 |                                                                                                          |                                                                                                                                                                                       |                        |                  |                  |
| 42 |                                                                                                          |                                                                                                                                                                                       |                        |                  |                  |
| 43 |                                                                                                          |                                                                                                                                                                                       |                        |                  |                  |
| 44 |                                                                                                          |                                                                                                                                                                                       |                        |                  |                  |
| 45 |                                                                                                          |                                                                                                                                                                                       |                        |                  |                  |
| 46 |                                                                                                          |                                                                                                                                                                                       |                        |                  |                  |

|    |                                                                                                                                                                       |                      |          |                  |
|----|-----------------------------------------------------------------------------------------------------------------------------------------------------------------------|----------------------|----------|------------------|
| 1  | CYP3A genotypes of donors but not those of the patients increase the risk of acute rejection in renal transplant recipients on calcineurin inhibitors: a pilot study. | Gervasini G et al.   | 29043387 | No data for ACE2 |
| 2  |                                                                                                                                                                       |                      |          |                  |
| 3  |                                                                                                                                                                       |                      |          |                  |
| 4  |                                                                                                                                                                       |                      |          |                  |
| 5  |                                                                                                                                                                       |                      |          |                  |
| 6  | 1                                                                                                                                                                     |                      |          |                  |
| 7  |                                                                                                                                                                       |                      |          |                  |
| 8  | 1                                                                                                                                                                     | Ma L et al.          | 29629376 | No data for ACE2 |
| 9  |                                                                                                                                                                       |                      |          |                  |
| 10 |                                                                                                                                                                       |                      |          |                  |
| 11 | 1                                                                                                                                                                     | Tariq A et al.       | 29655960 | No data for ACE2 |
| 12 |                                                                                                                                                                       |                      |          |                  |
| 13 |                                                                                                                                                                       |                      |          |                  |
| 14 | 1                                                                                                                                                                     | Gantala SR et al.    | 29883760 | No data for ACE2 |
| 15 |                                                                                                                                                                       |                      |          |                  |
| 16 |                                                                                                                                                                       |                      |          |                  |
| 17 | 1                                                                                                                                                                     | Ciftci HS et al.     | 30012031 | No data for ACE2 |
| 18 |                                                                                                                                                                       |                      |          |                  |
| 19 |                                                                                                                                                                       |                      |          |                  |
| 20 |                                                                                                                                                                       |                      |          |                  |
| 21 | 1                                                                                                                                                                     | Gillespie GA et al.  | 1709739  | Non-human study  |
| 22 |                                                                                                                                                                       |                      |          |                  |
| 23 |                                                                                                                                                                       |                      |          |                  |
| 24 | 1                                                                                                                                                                     | Velan B et al.       | 1849451  | Non-human study  |
| 25 |                                                                                                                                                                       |                      |          |                  |
| 26 |                                                                                                                                                                       |                      |          |                  |
| 27 | 1                                                                                                                                                                     | de Morais SM et al.  | 2501210  | Non-human study  |
| 28 |                                                                                                                                                                       |                      |          |                  |
| 29 |                                                                                                                                                                       |                      |          |                  |
| 30 | 1                                                                                                                                                                     | Shaws TB et al.      | 4856818  | Non-human study  |
| 31 |                                                                                                                                                                       |                      |          |                  |
| 32 | 1                                                                                                                                                                     | Catanzaro OL et al.  | 6186886  | Non-human study  |
| 33 |                                                                                                                                                                       |                      |          |                  |
| 34 |                                                                                                                                                                       |                      |          |                  |
| 35 | 1                                                                                                                                                                     | Tenenhouse HS et al. | 7873297  | Non-human study  |
| 36 |                                                                                                                                                                       |                      |          |                  |
| 37 | 1                                                                                                                                                                     | Sekine M et al.      | 7983056  | Non-human study  |
| 38 |                                                                                                                                                                       |                      |          |                  |
| 39 | 1                                                                                                                                                                     | Turner N et al.      | 8006020  | Non-human study  |
| 40 |                                                                                                                                                                       |                      |          |                  |
| 41 |                                                                                                                                                                       |                      |          |                  |
| 42 |                                                                                                                                                                       |                      |          |                  |
| 43 |                                                                                                                                                                       |                      |          |                  |
| 44 |                                                                                                                                                                       |                      |          |                  |
| 45 |                                                                                                                                                                       |                      |          |                  |
| 46 |                                                                                                                                                                       |                      |          |                  |

|    |                                                                                  |                                                                                                                                                     |                      |                 |                 |
|----|----------------------------------------------------------------------------------|-----------------------------------------------------------------------------------------------------------------------------------------------------|----------------------|-----------------|-----------------|
| 1  | Expression of a dominant allele of human ARF1 inhibits membrane traffic in vivo. | Zhang CJ et al.                                                                                                                                     | 8294513              | Non-human study |                 |
| 2  |                                                                                  |                                                                                                                                                     |                      |                 |                 |
| 3  |                                                                                  |                                                                                                                                                     |                      |                 |                 |
| 4  |                                                                                  |                                                                                                                                                     |                      |                 |                 |
| 5  | 1                                                                                | Testosterone modulation of N-acetylation in mouse kidney.                                                                                           | Smolen TN et al.     | 8437129         | Non-human study |
| 6  |                                                                                  |                                                                                                                                                     |                      |                 |                 |
| 7  | 1                                                                                | Evidence that syntaxin 1A is involved in storage in the secretory pathway.                                                                          | Bittner MA et al.    | 8626670         | Non-human study |
| 8  |                                                                                  |                                                                                                                                                     |                      |                 |                 |
| 9  | 1                                                                                | Role of the ceramide-signaling pathway in cytokine responses to P-fimbriated Escherichia coli.                                                      | Hedlund M et al.     | 8642245         | Non-human study |
| 10 |                                                                                  |                                                                                                                                                     |                      |                 |                 |
| 11 | 1                                                                                | Tissue-specific imprinting of the mouse insulin-like growth factor II receptor gene correlates with differential allele-specific DNA methylation.   | Hu JF et al.         | 9482664         | Non-human study |
| 12 |                                                                                  |                                                                                                                                                     |                      |                 |                 |
| 13 | 1                                                                                | Chronic renal failure in a mouse model of human adenine phosphoribosyltransferase deficiency.                                                       | Stockelman MG et al. | 9689017         | Non-human study |
| 14 |                                                                                  |                                                                                                                                                     |                      |                 |                 |
| 15 | 1                                                                                | Renal angiotensin converting enzyme promotes renal damage during ureteral obstruction                                                               | Stoneking BJ et al.  | 9719278         | Non-human study |
| 16 |                                                                                  |                                                                                                                                                     |                      |                 |                 |
| 17 | 1                                                                                | Detection of mutation(s) or polymorphic loci in the genome of experimental animal and human cancer tissues by RAPD/AP-PCR depend on DNA polymerase. | Singh KP et al.      | 10087325        | Non-human study |
| 18 |                                                                                  |                                                                                                                                                     |                      |                 |                 |
| 19 | 1                                                                                | Truncated human leptin (delta133) associated with extreme obesity undergoes proteasomal degradation after defective intracellular transport.        | Rau H et al.         | 10098508        | Non-human study |
| 20 |                                                                                  |                                                                                                                                                     |                      |                 |                 |
| 21 | 1                                                                                | The mll-AF9 gene fusion in mice controls myeloproliferation and specifies acute myeloid leukaemogenesis.                                            | Dobson CL et al.     | 10393173        | Non-human study |
| 22 |                                                                                  |                                                                                                                                                     |                      |                 |                 |
| 23 | 1                                                                                | Nitric oxide-dependent renal vasodilatation is not altered in rat with rHuEpo-induced hypertension.                                                 | Migliori M et al.    | 10394113        | Non-human study |
| 24 |                                                                                  |                                                                                                                                                     |                      |                 |                 |
| 25 | 1                                                                                | Decreased matrix metalloproteinase activity in the kidneys of hereditary nephrotic mice (ICGN strain).                                              | Uchio K et al.       | 11014984        | Non-human study |
| 26 |                                                                                  |                                                                                                                                                     |                      |                 |                 |
| 27 | 1                                                                                | p300 interacts with the nuclear proto-oncoprotein SYT as part of the active control of cell adhesion.                                               | Eid JE et al.        | 11030627        | Non-human study |
| 28 |                                                                                  |                                                                                                                                                     |                      |                 |                 |
| 29 |                                                                                  |                                                                                                                                                     |                      |                 |                 |
| 30 |                                                                                  |                                                                                                                                                     |                      |                 |                 |
| 31 |                                                                                  |                                                                                                                                                     |                      |                 |                 |
| 32 |                                                                                  |                                                                                                                                                     |                      |                 |                 |
| 33 |                                                                                  |                                                                                                                                                     |                      |                 |                 |
| 34 |                                                                                  |                                                                                                                                                     |                      |                 |                 |
| 35 |                                                                                  |                                                                                                                                                     |                      |                 |                 |
| 36 |                                                                                  |                                                                                                                                                     |                      |                 |                 |
| 37 |                                                                                  |                                                                                                                                                     |                      |                 |                 |
| 38 |                                                                                  |                                                                                                                                                     |                      |                 |                 |
| 39 |                                                                                  |                                                                                                                                                     |                      |                 |                 |
| 40 |                                                                                  |                                                                                                                                                     |                      |                 |                 |
| 41 |                                                                                  |                                                                                                                                                     |                      |                 |                 |
| 42 |                                                                                  |                                                                                                                                                     |                      |                 |                 |
| 43 |                                                                                  |                                                                                                                                                     |                      |                 |                 |
| 44 |                                                                                  |                                                                                                                                                     |                      |                 |                 |
| 45 |                                                                                  |                                                                                                                                                     |                      |                 |                 |
| 46 |                                                                                  |                                                                                                                                                     |                      |                 |                 |



|    |                                                                                                                                                                                                                                |                     |          |                 |
|----|--------------------------------------------------------------------------------------------------------------------------------------------------------------------------------------------------------------------------------|---------------------|----------|-----------------|
| 1  | Telomerase inhibition in RenCa, a murine tumor cell line with short telomeres, by overexpression of a dominant negative mTERT mutant, reveals fundamental differences in telomerase regulation between human and murine cells. | Sachsinger J et al. | 11454711 | Non-human study |
| 2  |                                                                                                                                                                                                                                |                     |          |                 |
| 3  |                                                                                                                                                                                                                                |                     |          |                 |
| 4  |                                                                                                                                                                                                                                |                     |          |                 |
| 5  |                                                                                                                                                                                                                                |                     |          |                 |
| 6  |                                                                                                                                                                                                                                |                     |          |                 |
| 7  |                                                                                                                                                                                                                                |                     |          |                 |
| 8  |                                                                                                                                                                                                                                |                     |          |                 |
| 9  |                                                                                                                                                                                                                                |                     |          |                 |
| 10 |                                                                                                                                                                                                                                |                     |          |                 |
| 11 |                                                                                                                                                                                                                                |                     |          |                 |
| 12 |                                                                                                                                                                                                                                |                     |          |                 |
| 13 |                                                                                                                                                                                                                                |                     |          |                 |
| 14 |                                                                                                                                                                                                                                |                     |          |                 |
| 15 |                                                                                                                                                                                                                                |                     |          |                 |
| 16 |                                                                                                                                                                                                                                |                     |          |                 |
| 17 |                                                                                                                                                                                                                                |                     |          |                 |
| 18 |                                                                                                                                                                                                                                |                     |          |                 |
| 19 |                                                                                                                                                                                                                                |                     |          |                 |
| 20 |                                                                                                                                                                                                                                |                     |          |                 |
| 21 |                                                                                                                                                                                                                                |                     |          |                 |
| 22 |                                                                                                                                                                                                                                |                     |          |                 |
| 23 |                                                                                                                                                                                                                                |                     |          |                 |
| 24 |                                                                                                                                                                                                                                |                     |          |                 |
| 25 |                                                                                                                                                                                                                                |                     |          |                 |
| 26 |                                                                                                                                                                                                                                |                     |          |                 |
| 27 |                                                                                                                                                                                                                                |                     |          |                 |
| 28 |                                                                                                                                                                                                                                |                     |          |                 |
| 29 |                                                                                                                                                                                                                                |                     |          |                 |
| 30 |                                                                                                                                                                                                                                |                     |          |                 |
| 31 |                                                                                                                                                                                                                                |                     |          |                 |
| 32 |                                                                                                                                                                                                                                |                     |          |                 |
| 33 |                                                                                                                                                                                                                                |                     |          |                 |
| 34 |                                                                                                                                                                                                                                |                     |          |                 |
| 35 |                                                                                                                                                                                                                                |                     |          |                 |
| 36 |                                                                                                                                                                                                                                |                     |          |                 |
| 37 |                                                                                                                                                                                                                                |                     |          |                 |
| 38 |                                                                                                                                                                                                                                |                     |          |                 |
| 39 |                                                                                                                                                                                                                                |                     |          |                 |
| 40 |                                                                                                                                                                                                                                |                     |          |                 |
| 41 |                                                                                                                                                                                                                                |                     |          |                 |
| 42 |                                                                                                                                                                                                                                |                     |          |                 |
| 43 |                                                                                                                                                                                                                                |                     |          |                 |
| 44 |                                                                                                                                                                                                                                |                     |          |                 |
| 45 |                                                                                                                                                                                                                                |                     |          |                 |
| 46 |                                                                                                                                                                                                                                |                     |          |                 |



|    |                                                                                                            |                                                                                                                                                                                                                              |                     |                 |                 |
|----|------------------------------------------------------------------------------------------------------------|------------------------------------------------------------------------------------------------------------------------------------------------------------------------------------------------------------------------------|---------------------|-----------------|-----------------|
| 1  | Fluorescence resonance energy transfer reports properties of syntaxin1a interaction with Munc18-1 in vivo. | Liu J et al.                                                                                                                                                                                                                 | 15489225            | Non-human study |                 |
| 2  |                                                                                                            |                                                                                                                                                                                                                              |                     |                 |                 |
| 3  |                                                                                                            |                                                                                                                                                                                                                              |                     |                 |                 |
| 4  | 1                                                                                                          | Sprouty1 is a critical regulator of GDNF/RET-mediated kidney induction.                                                                                                                                                      | Basson MA et al.    | 15691764        | Non-human study |
| 5  |                                                                                                            |                                                                                                                                                                                                                              |                     |                 |                 |
| 6  | 1                                                                                                          | Alternative splicing of vitamin D-24-hydroxylase: a novel mechanism for the regulation of extrarenal 1,25-dihydroxyvitamin D synthesis.                                                                                      | Ren S et al.        | 15788398        | Non-human study |
| 7  |                                                                                                            |                                                                                                                                                                                                                              |                     |                 |                 |
| 8  | 1                                                                                                          | Hypoxia induces a functionally significant and translationally efficient neuronal NO synthase mRNA variant.                                                                                                                  | Ward ME et al.      | 16276418        | Non-human study |
| 9  |                                                                                                            |                                                                                                                                                                                                                              |                     |                 |                 |
| 10 | 1                                                                                                          | Luteinizing hormone receptor ectodomain splice variant misroutes the full-length receptor into a subcompartment of the endoplasmic reticulum.                                                                                | Apaja PM et al.     | 16495341        | Non-human study |
| 11 |                                                                                                            |                                                                                                                                                                                                                              |                     |                 |                 |
| 12 | 1                                                                                                          | N-terminal residues control proteasomal degradation of RGS2, RGS4, and RGS5 in human embryonic kidney 293 cells.                                                                                                             | Bodenstein J et al. | 17220356        | Non-human study |
| 13 |                                                                                                            |                                                                                                                                                                                                                              |                     |                 |                 |
| 14 | 1                                                                                                          | Characterization of transcriptional regulation of neurogranin by nitric oxide and the role of neurogranin in SNP-induced cell death: implication of neurogranin in an increased neuronal susceptibility to oxidative stress. | Gui J et al.        | 17389928        | Non-human study |
| 15 |                                                                                                            |                                                                                                                                                                                                                              |                     |                 |                 |
| 16 | 1                                                                                                          | Fecal carriage of Escherichia coli O157:H7 and carcass contamination in cattle at slaughter in northern Italy.                                                                                                               | Alonso S et al.     | 17661289        | Non-human study |
| 17 |                                                                                                            |                                                                                                                                                                                                                              |                     |                 |                 |
| 18 | 1                                                                                                          | Generation and functional characterization of mice with a disrupted glutathione S-transferase, theta 1 gene.                                                                                                                 | Fujimoto K et al.   | 17827337        | Non-human study |
| 19 |                                                                                                            |                                                                                                                                                                                                                              |                     |                 |                 |
| 20 | 1                                                                                                          | Functional genetic variation in aminopeptidase A (ENPEP): lack of clear association with focal and segmental glomerulosclerosis (FSGS).                                                                                      | Tonna S et al.      | 18206321        | Non-human study |
| 21 |                                                                                                            |                                                                                                                                                                                                                              |                     |                 |                 |
| 22 | 1                                                                                                          | Hepatitis C virus replication is inhibited by 22beta-methoxyolean-12-ene-3beta, 24(4beta)-diol (ME3738) through enhancing interferon-beta.                                                                                   | Hiasa Y et al.      | 18459156        | Non-human study |
| 23 |                                                                                                            |                                                                                                                                                                                                                              |                     |                 |                 |
| 24 | 1                                                                                                          | Characterization of a novel cardiac isoform of the cell cycle-related kinase that is regulated during heart failure.                                                                                                         | Qiu H et al.        | 18508765        | Non-human study |
| 25 |                                                                                                            |                                                                                                                                                                                                                              |                     |                 |                 |
| 26 | 1                                                                                                          | Increased insulin action in SKIP heterozygous knockout mice.                                                                                                                                                                 | Ijuin T et al.      | 18573875        | Non-human study |
| 27 |                                                                                                            |                                                                                                                                                                                                                              |                     |                 |                 |
| 28 | 1                                                                                                          | Mitochondrial dysfunction in mut methylmalonic acidemia.                                                                                                                                                                     | Chandler RJ et al.  | 19088183        | Non-human study |
| 29 |                                                                                                            |                                                                                                                                                                                                                              |                     |                 |                 |
| 30 | 1                                                                                                          | Overexpression of cytochrome P450 4F2 in mice increases 20-hydroxyeicosatetraenoic acid production and arterial blood pressure.                                                                                              | Liu X et al.        | 19279555        | Non-human study |
| 31 |                                                                                                            |                                                                                                                                                                                                                              |                     |                 |                 |
| 32 |                                                                                                            |                                                                                                                                                                                                                              |                     |                 |                 |
| 33 |                                                                                                            |                                                                                                                                                                                                                              |                     |                 |                 |
| 34 |                                                                                                            |                                                                                                                                                                                                                              |                     |                 |                 |
| 35 |                                                                                                            |                                                                                                                                                                                                                              |                     |                 |                 |
| 36 |                                                                                                            |                                                                                                                                                                                                                              |                     |                 |                 |
| 37 |                                                                                                            |                                                                                                                                                                                                                              |                     |                 |                 |
| 38 |                                                                                                            |                                                                                                                                                                                                                              |                     |                 |                 |
| 39 |                                                                                                            |                                                                                                                                                                                                                              |                     |                 |                 |
| 40 |                                                                                                            |                                                                                                                                                                                                                              |                     |                 |                 |
| 41 |                                                                                                            |                                                                                                                                                                                                                              |                     |                 |                 |
| 42 |                                                                                                            |                                                                                                                                                                                                                              |                     |                 |                 |
| 43 |                                                                                                            |                                                                                                                                                                                                                              |                     |                 |                 |
| 44 |                                                                                                            |                                                                                                                                                                                                                              |                     |                 |                 |
| 45 |                                                                                                            |                                                                                                                                                                                                                              |                     |                 |                 |
| 46 |                                                                                                            |                                                                                                                                                                                                                              |                     |                 |                 |

|    |   |                                                                                                                                                               |                    |          |                 |
|----|---|---------------------------------------------------------------------------------------------------------------------------------------------------------------|--------------------|----------|-----------------|
| 1  | 1 | Kallikrein genes are associated with lupus and glomerular basement membrane-specific antibody-induced nephritis in mice and humans.                           | Liu K et al.       | 19307730 | Non-human study |
| 2  | 1 | p38MAPK controls expression of multiple cell cycle inhibitors and islet proliferation with advancing age.                                                     | Wong ES et al.     | 19619499 | Non-human study |
| 3  | 1 | Blocking the salt-inducible kinase 1 network prevents the increases in cell sodium transport caused by a hypertension-linked mutation in human alpha-adducin. | Stenstrom K et al. | 19657284 | Non-human study |
| 4  | 1 | Maitotoxin converts the plasmalemmal Ca(2+) pump into a Ca(2+)-permeable nonselective cation channel.                                                         | Sinkins WG et al.  | 19794142 | Non-human study |
| 5  | 1 | MyoD control of SKIP expression during pig skeletal muscle development.                                                                                       | Xiong Q et al.     | 20336382 | Non-human study |
| 6  | 1 | Targeted deletion of the Nesp55 DMR defines another Gnas imprinting control region and provides a mouse model of autosomal dominant PHP-1b.                   | Frohlich LF et al. | 20427744 | Non-human study |
| 7  | 1 | Autosomal recessive polycystic kidney disease epithelial cell model reveals multiple basolateral epidermal growth factor receptor sorting pathways.           | Ryan S et al.      | 20519437 | Non-human study |
| 8  | 1 | The activating mutation R201C in GNAS promotes intestinal tumourigenesis in Apc(Min/+) mice through activation of Wnt and ERK1/2 MAPK pathways.               | Wilson CH et al.   | 20531296 | Non-human study |
| 9  | 1 | Pitchfork regulates primary cilia disassembly and left-right asymmetry.                                                                                       | Kinzel D et al.    | 20643351 | Non-human study |
| 10 | 1 | Mediation of CTCF transcriptional insulation by DEAD-box RNA-binding protein p68 and steroid receptor RNA activator SRA.                                      | Yao H et al.       | 20966046 | Non-human study |
| 11 | 1 | A common polymorphism in the human aromatase gene alters the risk for polycystic ovary syndrome and modifies aromatase activity in vitro.                     | Wang H et al.      | 21282199 | Non-human study |
| 12 | 1 | Transgenic overexpression of the extra-large Gs1± variant XL1±s enhances Gs1±-mediated responses in the mouse renal proximal tubule in vivo.                  | Liu Z et al.       | 21303955 | Non-human study |
| 13 | 1 | Rat Ace allele variation determines susceptibility to AngII-induced renal damage                                                                              | Kamilic J et al.   | 21788250 | Non-human study |
| 14 | 1 | Carnosine treatment largely prevents alterations of renal carnosine metabolism in diabetic mice.                                                              | Peters V et al.    | 21833769 | Non-human study |

|    |                                                                                                                                                        |                                                                                                                                                                                  |                     |                 |                 |
|----|--------------------------------------------------------------------------------------------------------------------------------------------------------|----------------------------------------------------------------------------------------------------------------------------------------------------------------------------------|---------------------|-----------------|-----------------|
| 1  | YME1L controls the accumulation of respiratory chain subunits and is required for apoptotic resistance, cristae morphogenesis, and cell proliferation. | Stiburek L et al.                                                                                                                                                                | 22262461            | Non-human study |                 |
| 2  |                                                                                                                                                        |                                                                                                                                                                                  |                     |                 |                 |
| 3  |                                                                                                                                                        |                                                                                                                                                                                  |                     |                 |                 |
| 4  |                                                                                                                                                        |                                                                                                                                                                                  |                     |                 |                 |
| 5  |                                                                                                                                                        |                                                                                                                                                                                  |                     |                 |                 |
| 6  | 1                                                                                                                                                      | Primary hyperoxaluria in Coton de Tulear.                                                                                                                                        | Vidgren G et al.    | 22486513        | Non-human study |
| 7  |                                                                                                                                                        |                                                                                                                                                                                  |                     |                 |                 |
| 8  |                                                                                                                                                        |                                                                                                                                                                                  |                     |                 |                 |
| 9  |                                                                                                                                                        |                                                                                                                                                                                  |                     |                 |                 |
| 10 |                                                                                                                                                        |                                                                                                                                                                                  |                     |                 |                 |
| 11 | 1                                                                                                                                                      | Role of angiotensin-converting enzyme (ACE and ACE2) imbalance on tourniquet-induced remote kidney injury in a mouse hindlimb ischemia-reperfusion model                         | Yang XH et al.      | 22580272        | Non-human study |
| 12 |                                                                                                                                                        |                                                                                                                                                                                  |                     |                 |                 |
| 13 | 1                                                                                                                                                      | Tubule-specific ablation of endogenous $\beta$ -catenin aggravates acute kidney injury in mice.                                                                                  | Zhou D et al.       | 22622501        | Non-human study |
| 14 |                                                                                                                                                        |                                                                                                                                                                                  |                     |                 |                 |
| 15 | 1                                                                                                                                                      | $\beta$ 1,3-galactosyltransferase deficiency in germ-free miniature pigs increases N-glycolylneuraminic acids as the xenoantigenic determinant in pig-human xenotransplantation. | Park JY et al.      | 22775484        | Non-human study |
| 16 |                                                                                                                                                        |                                                                                                                                                                                  |                     |                 |                 |
| 17 |                                                                                                                                                        |                                                                                                                                                                                  |                     |                 |                 |
| 18 | 1                                                                                                                                                      | Cystic echinococcosis in Romania: an epidemiological survey of livestock demonstrates the persistence of hyperendemicity.                                                        | Mitreă IL et al.    | 23075460        | Non-human study |
| 19 |                                                                                                                                                        |                                                                                                                                                                                  |                     |                 |                 |
| 20 | 1                                                                                                                                                      | First WNK4-hypokalemia animal model identified by genome-wide association in Burmese cats.                                                                                       | Gandolfi B et al.   | 23285264        | Non-human study |
| 21 |                                                                                                                                                        |                                                                                                                                                                                  |                     |                 |                 |
| 22 | 1                                                                                                                                                      | Identification of aldo-keto reductases as NRF2-target marker genes in human cells.                                                                                               | Jung KA et al.      | 23305850        | Non-human study |
| 23 |                                                                                                                                                        |                                                                                                                                                                                  |                     |                 |                 |
| 24 | 1                                                                                                                                                      | An inducible transgenic mouse model for familial hypertension with hyperkalaemia (Gordon's syndrome or pseudohypoaldosteronism type II).                                         | Chowdhury JA et al. | 23336180        | Non-human study |
| 25 |                                                                                                                                                        |                                                                                                                                                                                  |                     |                 |                 |
| 26 | 1                                                                                                                                                      | Presence of N-glycosylated transthyretin in plasma of V30M carriers in familial amyloidotic polyneuropathy: an escape from ERAD.                                                 | Teixeira AC et al.  | 23387326        | Non-human study |
| 27 |                                                                                                                                                        |                                                                                                                                                                                  |                     |                 |                 |
| 28 | 1                                                                                                                                                      | Multi-species comparative analysis of the equine ACE gene identifies a highly conserved potential transcription factor binding site in intron 16.                                | Hamilton NA et al.  | 23408978        | Non-human study |
| 29 |                                                                                                                                                        |                                                                                                                                                                                  |                     |                 |                 |
| 30 | 1                                                                                                                                                      | Renal collecting duct NOS1 maintains fluid-electrolyte homeostasis and blood pressure.                                                                                           | Hyndman KA et al.   | 23608660        | Non-human study |
| 31 |                                                                                                                                                        |                                                                                                                                                                                  |                     |                 |                 |
| 32 | 1                                                                                                                                                      | ARHGDI1 mutations cause nephrotic syndrome via defective RHO GTPase signaling.                                                                                                   | Gee HY et al.       | 23867502        | Non-human study |
| 33 |                                                                                                                                                        |                                                                                                                                                                                  |                     |                 |                 |
| 34 |                                                                                                                                                        |                                                                                                                                                                                  |                     |                 |                 |
| 35 |                                                                                                                                                        |                                                                                                                                                                                  |                     |                 |                 |
| 36 |                                                                                                                                                        |                                                                                                                                                                                  |                     |                 |                 |
| 37 |                                                                                                                                                        |                                                                                                                                                                                  |                     |                 |                 |
| 38 |                                                                                                                                                        |                                                                                                                                                                                  |                     |                 |                 |
| 39 |                                                                                                                                                        |                                                                                                                                                                                  |                     |                 |                 |
| 40 |                                                                                                                                                        |                                                                                                                                                                                  |                     |                 |                 |
| 41 |                                                                                                                                                        |                                                                                                                                                                                  |                     |                 |                 |
| 42 |                                                                                                                                                        |                                                                                                                                                                                  |                     |                 |                 |
| 43 |                                                                                                                                                        |                                                                                                                                                                                  |                     |                 |                 |
| 44 |                                                                                                                                                        |                                                                                                                                                                                  |                     |                 |                 |
| 45 |                                                                                                                                                        |                                                                                                                                                                                  |                     |                 |                 |
| 46 |                                                                                                                                                        |                                                                                                                                                                                  |                     |                 |                 |

|    |                                                                                                                 |                                                                                                                                                                                     |                       |                 |                 |
|----|-----------------------------------------------------------------------------------------------------------------|-------------------------------------------------------------------------------------------------------------------------------------------------------------------------------------|-----------------------|-----------------|-----------------|
| 1  | A knock-in mouse model of human PHD2 gene-associated erythrocytosis establishes a haploinsufficiency mechanism. | Arsenault PR et al.                                                                                                                                                                 | 24121508              | Non-human study |                 |
| 2  |                                                                                                                 |                                                                                                                                                                                     |                       |                 |                 |
| 3  |                                                                                                                 |                                                                                                                                                                                     |                       |                 |                 |
| 4  |                                                                                                                 |                                                                                                                                                                                     |                       |                 |                 |
| 5  |                                                                                                                 |                                                                                                                                                                                     |                       |                 |                 |
| 6  | 1                                                                                                               | The Pex1-G844D mouse: a model for mild human Zellweger spectrum disorder.                                                                                                           | Hiebler S et al.      | 24503136        | Non-human study |
| 7  |                                                                                                                 |                                                                                                                                                                                     |                       |                 |                 |
| 8  |                                                                                                                 |                                                                                                                                                                                     |                       |                 |                 |
| 9  |                                                                                                                 |                                                                                                                                                                                     |                       |                 |                 |
| 10 | 1                                                                                                               | Holocarboxylase synthetase interacts physically with nuclear receptor co-repressor, histone deacetylase 1 and a novel splicing variant of histone deacetylase 1 to repress repeats. | Liu D et al.          | 24840043        | Non-human study |
| 11 |                                                                                                                 |                                                                                                                                                                                     |                       |                 |                 |
| 12 | 1                                                                                                               | Factor VIIa binding to endothelial cell protein C receptor protects vascular barrier integrity in vivo.                                                                             | Sundaram J et al.     | 24977291        | Non-human study |
| 13 |                                                                                                                 |                                                                                                                                                                                     |                       |                 |                 |
| 14 | 1                                                                                                               | Atrial natriuretic peptide locally counteracts the deleterious effects of cardiomyocyte mineralocorticoid receptor activation.                                                      | Nakagawa H et al.     | 25027872        | Non-human study |
| 15 |                                                                                                                 |                                                                                                                                                                                     |                       |                 |                 |
| 16 | 1                                                                                                               | The T309G murine double minute 2 gene polymorphism is an independent prognostic factor for patients with renal cell carcinoma.                                                      | de Martino M et al.   | 25415135        | Non-human study |
| 17 |                                                                                                                 |                                                                                                                                                                                     |                       |                 |                 |
| 18 |                                                                                                                 |                                                                                                                                                                                     |                       |                 |                 |
| 19 | 1                                                                                                               | Generation of WNK1 knockout cell lines by CRISPR/Cas-mediated genome editing.                                                                                                       | Roy A et al.          | 25477473        | Non-human study |
| 20 |                                                                                                                 |                                                                                                                                                                                     |                       |                 |                 |
| 21 | 1                                                                                                               | PTPN2 controls differentiation of CD4 <sup>+</sup> T cells and limits intestinal inflammation and intestinal dysbiosis.                                                             | Spalinger MR et al.   | 25492475        | Non-human study |
| 22 |                                                                                                                 |                                                                                                                                                                                     |                       |                 |                 |
| 23 | 1                                                                                                               | A functional 12T-insertion polymorphism in the ATP1A1 promoter confers decreased susceptibility to hypertension in a male Sardinian population.                                     | Herrera VL et al.     | 25615575        | Non-human study |
| 24 |                                                                                                                 |                                                                                                                                                                                     |                       |                 |                 |
| 25 |                                                                                                                 |                                                                                                                                                                                     |                       |                 |                 |
| 26 |                                                                                                                 |                                                                                                                                                                                     |                       |                 |                 |
| 27 | 1                                                                                                               | BAP1 missense mutation c.2054 A>T (p.E685V) completely disrupts normal splicing through creation of a novel 5' splice site in a human mesothelioma cell line.                       | Morrison A et al.     | 25830670        | Non-human study |
| 28 |                                                                                                                 |                                                                                                                                                                                     |                       |                 |                 |
| 29 | 1                                                                                                               | Identification of a receptor for extracellular renalase.                                                                                                                            | Wang L et al.         | 25906147        | Non-human study |
| 30 |                                                                                                                 |                                                                                                                                                                                     |                       |                 |                 |
| 31 | 1                                                                                                               | Mammalian target of rapamycin signaling inhibition ameliorates vascular calcification via Klotho upregulation.                                                                      | Zhao Y et al.         | 26061549        | Non-human study |
| 32 |                                                                                                                 |                                                                                                                                                                                     |                       |                 |                 |
| 33 | 1                                                                                                               | TNF $\alpha$ Amplifies DNaseI Expression in Renal Tubular Cells while IL-1 $\beta$ Promotes Nuclear DNaseI Translocation in an Endonuclease-Inactive Form.                          | Thiyagarajan D et al. | 26065428        | Non-human study |
| 34 |                                                                                                                 |                                                                                                                                                                                     |                       |                 |                 |
| 35 | 1                                                                                                               | DAPIT Over-Expression Modulates Glucose Metabolism and Cell Behaviour in HEK293T Cells.                                                                                             | Kontro H et al.       | 26161955        | Non-human study |
| 36 |                                                                                                                 |                                                                                                                                                                                     |                       |                 |                 |
| 37 |                                                                                                                 |                                                                                                                                                                                     |                       |                 |                 |
| 38 |                                                                                                                 |                                                                                                                                                                                     |                       |                 |                 |
| 39 |                                                                                                                 |                                                                                                                                                                                     |                       |                 |                 |
| 40 |                                                                                                                 |                                                                                                                                                                                     |                       |                 |                 |
| 41 |                                                                                                                 |                                                                                                                                                                                     |                       |                 |                 |
| 42 |                                                                                                                 |                                                                                                                                                                                     |                       |                 |                 |
| 43 |                                                                                                                 |                                                                                                                                                                                     |                       |                 |                 |
| 44 |                                                                                                                 |                                                                                                                                                                                     |                       |                 |                 |
| 45 |                                                                                                                 |                                                                                                                                                                                     |                       |                 |                 |
| 46 |                                                                                                                 |                                                                                                                                                                                     |                       |                 |                 |

|    |                                                                                                                                                                        |                      |          |                 |
|----|------------------------------------------------------------------------------------------------------------------------------------------------------------------------|----------------------|----------|-----------------|
| 1  | Allelic Variants in Arhgef11 via the Rho-Rock Pathway Are Linked to Epithelial-Mesenchymal Transition and Contributes to Kidney Injury in the Dahl Salt-Sensitive Rat. | Jia Z et al.         | 26172442 | Non-human study |
| 2  |                                                                                                                                                                        |                      |          |                 |
| 3  |                                                                                                                                                                        |                      |          |                 |
| 4  |                                                                                                                                                                        |                      |          |                 |
| 5  |                                                                                                                                                                        |                      |          |                 |
| 6  |                                                                                                                                                                        |                      |          |                 |
| 7  |                                                                                                                                                                        |                      |          |                 |
| 8  | 1 Human GRK4 <sup>T3142V</sup> Variant Promotes Angiotensin II Type I Receptor-Mediated Hypertension via Renal Histone Deacetylase Type 1 Inhibition.                  | Wang Z et al.        | 26667412 | Non-human study |
| 9  |                                                                                                                                                                        |                      |          |                 |
| 10 | 1 Dynamamin-2 is a novel NOS1 <sup>β</sup> interacting protein and negative regulator in the collecting duct.                                                          | Hyndman KA et al.    | 26791826 | Non-human study |
| 11 |                                                                                                                                                                        |                      |          |                 |
| 12 | 1 Re-engineering the zinc fingers of PRDM9 reverses hybrid sterility in mice.                                                                                          | Davies B et al.      | 26840484 | Non-human study |
| 13 |                                                                                                                                                                        |                      |          |                 |
| 14 | 1 Cardiac angiotensin-(1-12) expression and systemic hypertension in rats expressing the human angiotensinogen gene.                                                   | Ferrario CM et al.   | 26873967 | Non-human study |
| 15 |                                                                                                                                                                        |                      |          |                 |
| 16 | 1 From man to fish: What can Zebrafish tell us about ApoL1 nephropathy?                                                                                                | Olabisi O et al.     | 27509583 | Non-human study |
| 17 |                                                                                                                                                                        |                      |          |                 |
| 18 | 1 Cabozantinib inhibits tumor growth and metastasis of a patient-derived xenograft model of papillary renal cell carcinoma with MET mutation.                          | Zhao H et al.        | 27715452 | Non-human study |
| 19 |                                                                                                                                                                        |                      |          |                 |
| 20 | 1 Renin-angiotensin system transgenic mouse model recapitulates pathophysiology similar to human preeclampsia with renal injury that may be mediated through VEGF.     | Denney JM et al.     | 27927648 | Non-human study |
| 21 |                                                                                                                                                                        |                      |          |                 |
| 22 | 1 Inhibition of TRPC6 channels ameliorates renal fibrosis and contributes to renal protection by soluble klotho.                                                       | Wu YL et al.         | 27979597 | Non-human study |
| 23 |                                                                                                                                                                        |                      |          |                 |
| 24 | 1 Activated ERK1/2 increases CD44 in glomerular parietal epithelial cells leading to matrix expansion.                                                                 | Roeder SS et al.     | 27998643 | Non-human study |
| 25 |                                                                                                                                                                        |                      |          |                 |
| 26 | 1 Parallel microarray profiling identifies ErbB4 as a determinant of cyst growth in ADPKD and a prognostic biomarker for disease progression.                          | Streets AJ et al.    | 28077374 | Non-human study |
| 27 |                                                                                                                                                                        |                      |          |                 |
| 28 | 1 Targeting mTOR Signaling Can Prevent the Progression of FSGS.                                                                                                        | Zschiedrich S et al. | 28270414 | Non-human study |
| 29 |                                                                                                                                                                        |                      |          |                 |
| 30 | 1 The leukotriene B(4)-leukotriene B(4) receptor axis promotes cisplatin-induced acute kidney injury by modulating neutrophil recruitment.                             | Deng B et al.        | 28318626 | Non-human study |
| 31 |                                                                                                                                                                        |                      |          |                 |
| 32 | 1 DNase-active TREX1 frame-shift mutants induce serologic autoimmunity in mice.                                                                                        | Sakai T et al.       | 28325644 | Non-human study |
| 33 |                                                                                                                                                                        |                      |          |                 |
| 34 | 1 Human SR-BII mediates SAA uptake and contributes to SAA pro-inflammatory signaling in vitro and in vivo.                                                             | Baranova IN et al.   | 28423002 | Non-human study |
| 35 |                                                                                                                                                                        |                      |          |                 |
| 36 |                                                                                                                                                                        |                      |          |                 |
| 37 |                                                                                                                                                                        |                      |          |                 |
| 38 |                                                                                                                                                                        |                      |          |                 |
| 39 |                                                                                                                                                                        |                      |          |                 |
| 40 |                                                                                                                                                                        |                      |          |                 |
| 41 |                                                                                                                                                                        |                      |          |                 |
| 42 |                                                                                                                                                                        |                      |          |                 |
| 43 |                                                                                                                                                                        |                      |          |                 |
| 44 |                                                                                                                                                                        |                      |          |                 |
| 45 |                                                                                                                                                                        |                      |          |                 |
| 46 |                                                                                                                                                                        |                      |          |                 |

|    |   |                                                                                                                                                      |                     |          |                          |
|----|---|------------------------------------------------------------------------------------------------------------------------------------------------------|---------------------|----------|--------------------------|
| 1  | 1 | Bim gene dosage is critical in modulating nephron progenitor survival in the absence of microRNAs during kidney development.                         | Cerqueira DM et al. | 28446592 | Non-human study          |
| 2  | 1 | DBA/2J Haplotype on Distal Chromosome 2 Reduces Mertk Expression, Restricts Efferocytosis, and Increases Susceptibility to Atherosclerosis.          | Kayashima Y et al.  | 28473436 | Non-human study          |
| 3  | 1 | Inhibition of HDAC enhances STAT acetylation, blocks NF- $\kappa$ B, and suppresses the renal inflammation and fibrosis in Npr1 haplotype male mice. | Kumar P et al.      | 28566502 | Non-human study          |
| 4  | 1 | The regulatory 1 $\beta$ subunit of protein kinase A modulates renal cystogenesis.                                                                   | Ye H et al.         | 28615245 | Non-human study          |
| 5  | 1 | Functional analysis of human aromatic amino acid transporter MCT10/TAT1 using the yeast <i>Saccharomyces cerevisiae</i> .                            | Uemura S et al.     | 28754537 | Non-human study          |
| 6  | 1 | Kindlin-2 Association with Rho GDP-Dissociation Inhibitor $\beta$ Suppresses Rac1 Activation and Podocyte Injury.                                    | Sun Y et al.        | 28775002 | Non-human study          |
| 7  | 1 | Interference with Gs $\beta$ -Coupled Receptor Signaling in Renin-Producing Cells Leads to Renal Endothelial Damage.                                 | Lachmann P et al.   | 28775003 | Non-human study          |
| 8  | 1 | Blood Pressure Control by a Secreted FGF1 (Fibroblast Growth Factor-Binding Protein).                                                                | Tassi E et al.      | 29158353 | Non-human study          |
| 9  | 1 | Caspase-independent programmed cell death triggers Ca(2)PO(4) deposition in an in vitro model of nephrocalcinosis.                                   | Priante G et al.    | 29208768 | Non-human study          |
| 10 | 1 | Knockout of the interleukin-36 receptor protects against renal ischemia-reperfusion injury by reduction of proinflammatory cytokines.                | Nishikawa H et al.  | 29241623 | Non-human study          |
| 11 | 1 | Xyloketal B exerts antihypertensive effect in renovascular hypertensive rats via the NO-sGC-cGMP pathway and calcium signaling.                      | Zhao LY et al.      | 29595193 | Non-human study          |
| 12 | 1 | Mice Carrying a Dominant-Negative Human PI3K Mutation Are Protected From Obesity and Hepatic Steatosis but Not Diabetes.                             | Solheim MH et al.   | 29724723 | Non-human study          |
| 13 | 1 | A homozygous KAT2B variant modulates the clinical phenotype of ADD3 deficiency in humans and flies.                                                  | Goncalves S et al.  | 29768408 | Non-human study          |
| 14 | 1 | Haploinsufficiency of the Mouse <i>Atp6v1b1</i> Gene Leads to a Mild Acid-Base Disturbance with Implications for Kidney Stone Disease.               | Bourgeois S et al.  | 29843146 | Non-human study          |
| 15 | 1 | RFLP-DR beta and serological HLA-DR typing of 200 kidney recipients and 1000 controls.                                                               | Mytilineos J et al. | 1975140  | Not a case-control study |

|    |                                                                                                                 |                                                                                                                                                                                                                                                  |                    |                          |                          |
|----|-----------------------------------------------------------------------------------------------------------------|--------------------------------------------------------------------------------------------------------------------------------------------------------------------------------------------------------------------------------------------------|--------------------|--------------------------|--------------------------|
| 1  | Superoxide dismutase isozymes in different human tissues, their genetic control and intracellular localization. | Beckman G et al.                                                                                                                                                                                                                                 | 4775457            | Not a case-control study |                          |
| 2  |                                                                                                                 |                                                                                                                                                                                                                                                  |                    |                          |                          |
| 3  |                                                                                                                 |                                                                                                                                                                                                                                                  |                    |                          |                          |
| 4  | 1                                                                                                               | Genetic counselling in lethal X-linked disorders.                                                                                                                                                                                                | Emery AE et al.    | 4976958                  | Not a case-control study |
| 5  |                                                                                                                 |                                                                                                                                                                                                                                                  |                    |                          |                          |
| 6  |                                                                                                                 |                                                                                                                                                                                                                                                  |                    |                          |                          |
| 7  | 1                                                                                                               | DNA-based presymptomatic diagnosis for the von Hippel-Lindau disease by linkage analysis.                                                                                                                                                        | Olschwang S et al. | 7552140                  | Not a case-control study |
| 8  |                                                                                                                 |                                                                                                                                                                                                                                                  |                    |                          |                          |
| 9  |                                                                                                                 |                                                                                                                                                                                                                                                  |                    |                          |                          |
| 10 | 1                                                                                                               | Role of the deletion of polymorphism of the angiotensin converting enzyme gene in the progression and therapeutic responsiveness of IgA nephropathy.                                                                                             | Yoshida H et al.   | 7593601                  | Not a case-control study |
| 11 |                                                                                                                 |                                                                                                                                                                                                                                                  |                    |                          |                          |
| 12 |                                                                                                                 |                                                                                                                                                                                                                                                  |                    |                          |                          |
| 13 | 1                                                                                                               | Mistyping of the human angiotensin-converting enzyme gene polymorphism: frequency, causes and possible methods to avoid errors in typing.                                                                                                        | Ueda S et al.      | 8863184                  | Not a case-control study |
| 14 |                                                                                                                 |                                                                                                                                                                                                                                                  |                    |                          |                          |
| 15 |                                                                                                                 |                                                                                                                                                                                                                                                  |                    |                          |                          |
| 16 | 1                                                                                                               | Analysis of linkage disequilibrium between polymorphisms in the KCNJ9 gene with type 2 diabetes mellitus in Pima Indians.                                                                                                                        | Wolford JK et al.  | 11350189                 | Not a case-control study |
| 17 |                                                                                                                 |                                                                                                                                                                                                                                                  |                    |                          |                          |
| 18 |                                                                                                                 |                                                                                                                                                                                                                                                  |                    |                          |                          |
| 19 | 1                                                                                                               | A family of autosomal dominant hypocalcemia with a positive correlation between serum calcium and magnesium: identification of a novel gain of function mutation (Ser(820)Phe) in the calcium-sensing receptor.                                  | Nagase T et al.    | 12050233                 | Not a case-control study |
| 20 |                                                                                                                 |                                                                                                                                                                                                                                                  |                    |                          |                          |
| 21 |                                                                                                                 |                                                                                                                                                                                                                                                  |                    |                          |                          |
| 22 | 1                                                                                                               | Captopril enhances transforming growth factor (TGF)-beta1 expression in peripheral blood mononuclear cells: a mechanism independent from angiotensin converting enzyme inhibition? A study in cyclosporine-treated kidney-transplanted patients. | Di Paolo S et al.  | 12499886                 | Not a case-control study |
| 23 |                                                                                                                 |                                                                                                                                                                                                                                                  |                    |                          |                          |
| 24 |                                                                                                                 |                                                                                                                                                                                                                                                  |                    |                          |                          |
| 25 | 1                                                                                                               | Clinical assessment and mutation analysis of Kallmann syndrome 1 (KAL1) and fibroblast growth factor receptor 1 (FGFR1, or KAL2) in five families and 18 sporadic patients.                                                                      | Sato N et al.      | 15001591                 | Not a case-control study |
| 26 |                                                                                                                 |                                                                                                                                                                                                                                                  |                    |                          |                          |
| 27 |                                                                                                                 |                                                                                                                                                                                                                                                  |                    |                          |                          |
| 28 | 1                                                                                                               | The effect of CYP3A5 and MDR1 (ABCB1) polymorphisms on cyclosporine and tacrolimus dose requirements and trough blood levels in stable renal transplant patients.                                                                                | Haufroid V et al.  | 15167702                 | Not a case-control study |
| 29 |                                                                                                                 |                                                                                                                                                                                                                                                  |                    |                          |                          |
| 30 |                                                                                                                 |                                                                                                                                                                                                                                                  |                    |                          |                          |
| 31 | 1                                                                                                               | Antiproteinuric effect of candesartan cilexetil in Japanese subjects with type 2 diabetes and nephropathy.                                                                                                                                       | Haneda M et al.    | 15364166                 | Not a case-control study |
| 32 |                                                                                                                 |                                                                                                                                                                                                                                                  |                    |                          |                          |
| 33 |                                                                                                                 |                                                                                                                                                                                                                                                  |                    |                          |                          |
| 34 | 1                                                                                                               | An unusual association of contralateral congenital small kidney, reduced renal function and hyperparathyroidism in sponge kidney patients: on the track of the molecular basis.                                                                  | Gambaro G et al.   | 15814540                 | Not a case-control study |
| 35 |                                                                                                                 |                                                                                                                                                                                                                                                  |                    |                          |                          |
| 36 |                                                                                                                 |                                                                                                                                                                                                                                                  |                    |                          |                          |
| 37 |                                                                                                                 |                                                                                                                                                                                                                                                  |                    |                          |                          |
| 38 |                                                                                                                 |                                                                                                                                                                                                                                                  |                    |                          |                          |
| 39 |                                                                                                                 |                                                                                                                                                                                                                                                  |                    |                          |                          |
| 40 |                                                                                                                 |                                                                                                                                                                                                                                                  |                    |                          |                          |
| 41 |                                                                                                                 |                                                                                                                                                                                                                                                  |                    |                          |                          |
| 42 |                                                                                                                 |                                                                                                                                                                                                                                                  |                    |                          |                          |
| 43 |                                                                                                                 |                                                                                                                                                                                                                                                  |                    |                          |                          |
| 44 |                                                                                                                 |                                                                                                                                                                                                                                                  |                    |                          |                          |
| 45 |                                                                                                                 |                                                                                                                                                                                                                                                  |                    |                          |                          |
| 46 |                                                                                                                 |                                                                                                                                                                                                                                                  |                    |                          |                          |



|    |                                                                                                                                                     |                                                                                                                                                                                           |                         |                          |                          |
|----|-----------------------------------------------------------------------------------------------------------------------------------------------------|-------------------------------------------------------------------------------------------------------------------------------------------------------------------------------------------|-------------------------|--------------------------|--------------------------|
| 1  | Presentation and role of transplantation in adult patients with type 1 primary hyperoxaluria and the I244T AGXT mutation: Single-center experience. | Lorenzo V et al.                                                                                                                                                                          | 16912707                | Not a case-control study |                          |
| 2  |                                                                                                                                                     |                                                                                                                                                                                           |                         |                          |                          |
| 3  |                                                                                                                                                     |                                                                                                                                                                                           |                         |                          |                          |
| 4  |                                                                                                                                                     |                                                                                                                                                                                           |                         |                          |                          |
| 5  |                                                                                                                                                     |                                                                                                                                                                                           |                         |                          |                          |
| 6  | 1                                                                                                                                                   | Familial nonsyndromic pheochromocytoma.                                                                                                                                                   | Opocher G et al.        | 17102081                 | Not a case-control study |
| 7  |                                                                                                                                                     |                                                                                                                                                                                           |                         |                          |                          |
| 8  | 1                                                                                                                                                   | Synergistic expression of angiotensin-converting enzyme (ACE) and ACE2 in human renal tissue and confounding effects of hypertension on the ACE to ACE2 ratio                             | Wakahara et al.         | 17303661                 | Not a case-control study |
| 9  |                                                                                                                                                     |                                                                                                                                                                                           |                         |                          |                          |
| 10 | 1                                                                                                                                                   | Verification of consumers' experiences and perceptions of genetic discrimination and its impact on utilization of genetic testing.                                                        | Barlow-Stewart K et al. | 19287242                 | Not a case-control study |
| 11 |                                                                                                                                                     |                                                                                                                                                                                           |                         |                          |                          |
| 12 | 1                                                                                                                                                   | Porphyria in Switzerland, 15 years experience.                                                                                                                                            | Schneider-Yin X et al.  | 19350426                 | Not a case-control study |
| 13 |                                                                                                                                                     |                                                                                                                                                                                           |                         |                          |                          |
| 14 | 1                                                                                                                                                   | Whole-genome linkage and association scan in primary, nonsyndromic vesicoureteric reflux.                                                                                                 | Cordell HJ et al.       | 19959718                 | Not a case-control study |
| 15 |                                                                                                                                                     |                                                                                                                                                                                           |                         |                          |                          |
| 16 | 1                                                                                                                                                   | Identification of a gene for renal-hepatic-pancreatic dysplasia by microarray-based homozygosity mapping.                                                                                 | Fiskerstrand T et al.   | 20007846                 | Not a case-control study |
| 17 |                                                                                                                                                     |                                                                                                                                                                                           |                         |                          |                          |
| 18 | 1                                                                                                                                                   | Bardet-Biedl syndrome in Denmark--report of 13 novel sequence variations in six genes.                                                                                                    | Hjortshoj TD et al.     | 20120035                 | Not a case-control study |
| 19 |                                                                                                                                                     |                                                                                                                                                                                           |                         |                          |                          |
| 20 | 1                                                                                                                                                   | Chromosome 7p linkage and association study for diabetes related traits and type 2 diabetes in an African-American population enriched for nephropathy.                                   | Leak TS et al.          | 20144192                 | Not a case-control study |
| 21 |                                                                                                                                                     |                                                                                                                                                                                           |                         |                          |                          |
| 22 | 1                                                                                                                                                   | MYH9 genetic variants associated with glomerular disease: what is the role for genetic testing?                                                                                           | Kopp JB et al.          | 20807613                 | Not a case-control study |
| 23 |                                                                                                                                                     |                                                                                                                                                                                           |                         |                          |                          |
| 24 | 1                                                                                                                                                   | A prospective, open-label, observational clinical cohort study of the association between delayed renal allograft function, tacrolimus exposure, and CYP3A5 genotype in adult recipients. | Kuypers DR et al.       | 21118736                 | Not a case-control study |
| 25 |                                                                                                                                                     |                                                                                                                                                                                           |                         |                          |                          |
| 26 | 1                                                                                                                                                   | Acute kidney injury reduces the hepatic metabolism of midazolam in critically ill patients.                                                                                               | Kirwan CJ et al.        | 22005822                 | Not a case-control study |
| 27 |                                                                                                                                                     |                                                                                                                                                                                           |                         |                          |                          |
| 28 | 1                                                                                                                                                   | ABCB1 polymorphisms are associated with cyclosporine-induced nephrotoxicity and gingival hyperplasia in renal transplant recipients.                                                      | Garcia M et al.         | 22886152                 | Not a case-control study |
| 29 |                                                                                                                                                     |                                                                                                                                                                                           |                         |                          |                          |
| 30 |                                                                                                                                                     |                                                                                                                                                                                           |                         |                          |                          |
| 31 |                                                                                                                                                     |                                                                                                                                                                                           |                         |                          |                          |
| 32 |                                                                                                                                                     |                                                                                                                                                                                           |                         |                          |                          |
| 33 |                                                                                                                                                     |                                                                                                                                                                                           |                         |                          |                          |
| 34 |                                                                                                                                                     |                                                                                                                                                                                           |                         |                          |                          |
| 35 |                                                                                                                                                     |                                                                                                                                                                                           |                         |                          |                          |
| 36 |                                                                                                                                                     |                                                                                                                                                                                           |                         |                          |                          |
| 37 |                                                                                                                                                     |                                                                                                                                                                                           |                         |                          |                          |
| 38 |                                                                                                                                                     |                                                                                                                                                                                           |                         |                          |                          |
| 39 |                                                                                                                                                     |                                                                                                                                                                                           |                         |                          |                          |
| 40 |                                                                                                                                                     |                                                                                                                                                                                           |                         |                          |                          |
| 41 |                                                                                                                                                     |                                                                                                                                                                                           |                         |                          |                          |
| 42 |                                                                                                                                                     |                                                                                                                                                                                           |                         |                          |                          |
| 43 |                                                                                                                                                     |                                                                                                                                                                                           |                         |                          |                          |
| 44 |                                                                                                                                                     |                                                                                                                                                                                           |                         |                          |                          |
| 45 |                                                                                                                                                     |                                                                                                                                                                                           |                         |                          |                          |
| 46 |                                                                                                                                                     |                                                                                                                                                                                           |                         |                          |                          |



|    |                                                                                                                |                                                                                                                                                                |                      |                          |                          |
|----|----------------------------------------------------------------------------------------------------------------|----------------------------------------------------------------------------------------------------------------------------------------------------------------|----------------------|--------------------------|--------------------------|
| 1  | Novel SMARCAL1 bi-allelic mutations associated with a chromosomal breakage phenotype in a severe SIOD patient. | Simon AJ et al.                                                                                                                                                | 24197801             | Not a case-control study |                          |
| 2  |                                                                                                                |                                                                                                                                                                |                      |                          |                          |
| 3  |                                                                                                                |                                                                                                                                                                |                      |                          |                          |
| 4  |                                                                                                                |                                                                                                                                                                |                      |                          |                          |
| 5  |                                                                                                                |                                                                                                                                                                |                      |                          |                          |
| 6  | 1                                                                                                              | Brief Report: identification of MTMR3 as a novel susceptibility gene for lupus nephritis in northern Han Chinese by shared-gene analysis with IgA nephropathy. | Zhou XJ et al.       | 24943867                 | Not a case-control study |
| 7  |                                                                                                                |                                                                                                                                                                |                      |                          |                          |
| 8  |                                                                                                                |                                                                                                                                                                |                      |                          |                          |
| 9  | 1                                                                                                              | An efficient and comprehensive strategy for genetic diagnostics of polycystic kidney disease.                                                                  | Eisenberger T et al. | 25646624                 | Not a case-control study |
| 10 |                                                                                                                |                                                                                                                                                                |                      |                          |                          |
| 11 |                                                                                                                |                                                                                                                                                                |                      |                          |                          |
| 12 | 1                                                                                                              | ABCB1 (MDR-1) pharmacogenetics of tacrolimus in renal transplanted patients: a Next Generation Sequencing approach.                                            | Tavira B et al.      | 25781547                 | Not a case-control study |
| 13 |                                                                                                                |                                                                                                                                                                |                      |                          |                          |
| 14 | 1                                                                                                              | Novel mutations in the inverted formin 2 gene of Chinese families contribute to focal segmental glomerulosclerosis.                                            | Xie J et al.         | 26039629                 | Not a case-control study |
| 15 |                                                                                                                |                                                                                                                                                                |                      |                          |                          |
| 16 | 1                                                                                                              | A Novel von Hippel Lindau Gene Intronic Variant and Its Reclassification from VUS to Pathogenic: the Impact on a Large Family.                                 | Sexton A et al.      | 26323595                 | Not a case-control study |
| 17 |                                                                                                                |                                                                                                                                                                |                      |                          |                          |
| 18 |                                                                                                                |                                                                                                                                                                |                      |                          |                          |
| 19 | 1                                                                                                              | Genome-wide Association Studies Identify Genetic Loci Associated With Albuminuria in Diabetes.                                                                 | Teumer A et al.      | 26631737                 | Not a case-control study |
| 20 |                                                                                                                |                                                                                                                                                                |                      |                          |                          |
| 21 | 1                                                                                                              | Updated genetic testing of Italian patients referred with a clinical diagnosis of primary hyperoxaluria.                                                       | Pelle A et al.       | 26946417                 | Not a case-control study |
| 22 |                                                                                                                |                                                                                                                                                                |                      |                          |                          |
| 23 | 1                                                                                                              | Polypoid urothelial tumor with inverted growth pattern in the renal pelvis: morphologic and molecular characteristics of a unique diagnostic entity.           | Wobker SE et al.     | 27574810                 | Not a case-control study |
| 24 |                                                                                                                |                                                                                                                                                                |                      |                          |                          |
| 25 |                                                                                                                |                                                                                                                                                                |                      |                          |                          |
| 26 | 1                                                                                                              | Haploinsufficiency in tumor predisposition syndromes: altered genomic transcription in morphologically normal cells heterozygous for VHL or TSC mutation.      | Peri S et al.        | 27682873                 | Not a case-control study |
| 27 |                                                                                                                |                                                                                                                                                                |                      |                          |                          |
| 28 |                                                                                                                |                                                                                                                                                                |                      |                          |                          |
| 29 | 1                                                                                                              | CYP3A4*1G and CYP3A5*3 genetic polymorphisms alter the antihypertensive efficacy of amlodipine in patients with hypertension following renal transplantation.  | Huang Y et al.       | 27841150                 | Not a case-control study |
| 30 |                                                                                                                |                                                                                                                                                                |                      |                          |                          |
| 31 | 1                                                                                                              | Clinical, Genetic and Innate Immunity Characteristics of Melanoma in Organ Transplant Recipients.                                                              | Brocard A et al.     | 27868139                 | Not a case-control study |
| 32 |                                                                                                                |                                                                                                                                                                |                      |                          |                          |
| 33 |                                                                                                                |                                                                                                                                                                |                      |                          |                          |
| 34 | 1                                                                                                              | Clinical impact of the CYP3A5 6986A>G allelic variant on kidney transplantation outcomes.                                                                      | Flahault A et al.    | 27977332                 | Not a case-control study |
| 35 |                                                                                                                |                                                                                                                                                                |                      |                          |                          |
| 36 | 1                                                                                                              | Smoking has no impact on survival and it is not associated with ACE gene I/D polymorphism in hemodialysis patients.                                            | Kiss I et al.        | 28058974                 | Not a case-control study |
| 37 |                                                                                                                |                                                                                                                                                                |                      |                          |                          |
| 38 |                                                                                                                |                                                                                                                                                                |                      |                          |                          |
| 39 |                                                                                                                |                                                                                                                                                                |                      |                          |                          |
| 40 |                                                                                                                |                                                                                                                                                                |                      |                          |                          |
| 41 |                                                                                                                |                                                                                                                                                                |                      |                          |                          |
| 42 |                                                                                                                |                                                                                                                                                                |                      |                          |                          |
| 43 |                                                                                                                |                                                                                                                                                                |                      |                          |                          |
| 44 |                                                                                                                |                                                                                                                                                                |                      |                          |                          |
| 45 |                                                                                                                |                                                                                                                                                                |                      |                          |                          |
| 46 |                                                                                                                |                                                                                                                                                                |                      |                          |                          |

|    |   |                                                                                                                                                                                                           |                              |          |                          |
|----|---|-----------------------------------------------------------------------------------------------------------------------------------------------------------------------------------------------------------|------------------------------|----------|--------------------------|
| 1  | 1 | Evaluation of Glutathione Peroxidase and KCNJ11 Gene Polymorphisms in Patients with New Onset Diabetes Mellitus After Renal Transplantation.                                                              | Yalin GY et al.              | 28073131 | Not a case-control study |
| 2  | 1 | The CYP3A biomarker 4 $\beta$ -hydroxycholesterol does not improve tacrolimus dose predictions early after kidney transplantation.                                                                        | Storset E et al.             | 28146606 | Not a case-control study |
| 3  | 1 | Prograf produces more benefits for CYP3A5 low expression patients in early stage after kidney transplantation.                                                                                            | Fan B et al.                 | 28157649 | Not a case-control study |
| 4  | 1 | The genetic and clinical spectrum of a large cohort of patients with distal renal tubular acidosis.                                                                                                       | Palazzo V et al.             | 28233610 | Not a case-control study |
| 5  | 1 | Impact of the CYP3A5 genotype on the distributions of dose-adjusted trough concentrations and incidence of rejection in Japanese renal transplant recipients receiving different tacrolimus formulations. | Nioka T et al.               | 28271256 | Not a case-control study |
| 6  | 1 | Influence of ABCC2, CYP2C8, and CYP2J2 Polymorphisms on Tacrolimus and Mycophenolate Sodium-Based Treatment in Brazilian Kidney Transplant Recipients.                                                    | Genvigir FDV et al.          | 28316087 | Not a case-control study |
| 7  | 1 | Role of ACE and IL-1 $\beta$ Gene Polymorphisms in Erythropoietin Hyporesponsive Patients with Chronic Kidney Disease with Anemia.                                                                        | Nand N et al.                | 28457029 | Not a case-control study |
| 8  | 1 | Pretransplant 4 $\beta$ -hydroxycholesterol does not predict tacrolimus exposure or dose requirements during the first days after kidney transplantation.                                                 | Vanhove T et al.             | 28603840 | Not a case-control study |
| 9  | 1 | Sequencing of FIC1, BSEP and MDR3 in a large cohort of patients with cholestasis revealed a high number of different genetic variants.                                                                    | Droge C et al.               | 28733223 | Not a case-control study |
| 10 | 1 | Low renal but high extrarenal phenotype variability in Schimke immunosseous dysplasia.                                                                                                                    | Lipska-Zietkiewicz BS et al. | 28796785 | Not a case-control study |
| 11 | 1 | Wuzhi Tablet (Schisandra sphenanthera Extract) is a Promising Tacrolimus-Sparing Agent for Renal Transplant Recipients Who are CYP3A5 Expressers: a Two-Phase Prospective Study.                          | Li J et al.                  | 28864749 | Not a case-control study |
| 12 | 1 | Crizotinib achieves long-lasting disease control in advanced papillary renal-cell carcinoma type 1 patients with MET mutations or amplification. EORTC 90101 CREATE trial.                                | Schoffski P et al.           | 29149761 | Not a case-control study |

|    |   |                                                                                                                                                                         |                      |          |                           |
|----|---|-------------------------------------------------------------------------------------------------------------------------------------------------------------------------|----------------------|----------|---------------------------|
| 1  | 1 | Cost-effectiveness analysis of elbasvir-grazoprevir regimen for treating hepatitis C virus genotype 1 infection in stage 4-5 chronic kidney disease patients in France. | Maunoury F et al.    | 29543897 | Not a case-control study  |
| 2  | 1 | Late-onset acid maltase deficiency. Detection of patients and heterozygotes by urinary enzyme assay.                                                                    | Mehler M et al.      | 9923     | Not a renal disease focus |
| 3  | 1 | Differential inhibition of the products of the human alkaline phosphatase loci.                                                                                         | Mulivor RA et al.    | 686677   | Not a renal disease focus |
| 4  | 1 | A classification of tumor development based on an analysis of enzymes in tissue sections of hypernephroid carcinoma in man.                                             | Wachsmuth ED et al.  | 1016198  | Not a renal disease focus |
| 5  | 1 | Identification of mutations associated with peroxisome-to-mitochondrion mistargeting of alanine/glyoxylate aminotransferase in primary hyperoxaluria type 1.            | Purdue PE et al.     | 1703535  | Not a renal disease focus |
| 6  | 1 | Concentrations of ochratoxin A in the urine of endemic nephropathy patients and controls in Bulgaria: lack of detection of 4-hydroxyochratoxin A.                       | Castegnaro M et al.  | 1820331  | Not a renal disease focus |
| 7  | 1 | T-cell receptor beta-subunit gene polymorphism and autoimmune disease.                                                                                                  | Niven MJ et al.      | 1969400  | Not a renal disease focus |
| 8  | 1 | Role of P450IID6, the target of the sparteine-debrisoquin oxidation polymorphism, in the metabolism of imipramine.                                                      | Brosen K et al.      | 2060250  | Not a renal disease focus |
| 9  | 1 | Immunological heterogeneity of hepatic alanine:glyoxylate aminotransferase in primary hyperoxaluria type 1.                                                             | Wise PJ et al.       | 2443389  | Not a renal disease focus |
| 10 | 1 | Renin in blood vessels in human pulmonary tumors. An immunohistochemical and biochemical study.                                                                         | Taylor GM et al.     | 2450464  | Not a renal disease focus |
| 11 | 1 | Elevated concentrations of brain-type glycogen phosphorylase in renal cell carcinoma.                                                                                   | Takashi M et al.     | 2515181  | Not a renal disease focus |
| 12 | 1 | Origin of rare Ha-ras alleles: relationship of VTR length to a 5' polymorphic Xho I site.                                                                               | Baxter GD et al.     | 2558964  | Not a renal disease focus |
| 13 | 1 | Loss of heterozygosity at the c-raf locus in small cell lung carcinoma.                                                                                                 | Sithanandam G et al. | 2566144  | Not a renal disease focus |
| 14 | 1 | Mechanisms of suppression of renal kallikrein activity in low renin essential hypertension and renoparenchymal hypertension.                                            | Shimamoto K et al.   | 2676859  | Not a renal disease focus |

|    |                                                                                                                                                                                                                     |                    |         |                           |
|----|---------------------------------------------------------------------------------------------------------------------------------------------------------------------------------------------------------------------|--------------------|---------|---------------------------|
| 1  | Reduced expression of multiple forms of the alpha subunit of the stimulatory GTP-binding protein in pseudohypoparathyroidism type Ia.                                                                               | Carter A et al.    | 2890163 | Not a renal disease focus |
| 2  |                                                                                                                                                                                                                     |                    |         |                           |
| 3  |                                                                                                                                                                                                                     |                    |         |                           |
| 4  |                                                                                                                                                                                                                     |                    |         |                           |
| 5  |                                                                                                                                                                                                                     |                    |         |                           |
| 6  | 1 The beta-subunit of follicle-stimulating hormone is deleted in patients with aniridia and Wilms' tumour, allowing a further definition of the WAGR locus.                                                         | Glaser T et al.    | 3014343 | Not a renal disease focus |
| 7  |                                                                                                                                                                                                                     |                    |         |                           |
| 8  |                                                                                                                                                                                                                     |                    |         |                           |
| 9  |                                                                                                                                                                                                                     |                    |         |                           |
| 10 | 1 Further studies on the activity and subcellular distribution of alanine:glyoxylate aminotransferase in the livers of patients with primary hyperoxaluria type 1.                                                  | Danpure CJ et al.  | 3416563 | Not a renal disease focus |
| 11 |                                                                                                                                                                                                                     |                    |         |                           |
| 12 |                                                                                                                                                                                                                     |                    |         |                           |
| 13 | 1 Acetylator genotype-dependent metabolic activation of carcinogenic N-hydroxyarylamines by S-acetyl coenzyme A-dependent enzymes of inbred hamster tissue cytosols: relationship to arylamine N-acetyltransferase. | Hein DW et al.     | 3677303 | Not a renal disease focus |
| 14 |                                                                                                                                                                                                                     |                    |         |                           |
| 15 |                                                                                                                                                                                                                     |                    |         |                           |
| 16 |                                                                                                                                                                                                                     |                    |         |                           |
| 17 | 1 Persistence of streptococcal group A antibody in patients with rheumatic valvular disease.                                                                                                                        | Dudding BA et al.  | 5682941 | Not a renal disease focus |
| 18 |                                                                                                                                                                                                                     |                    |         |                           |
| 19 |                                                                                                                                                                                                                     |                    |         |                           |
| 20 | 1 Studies of an abnormal serum albumin unstable upon storage.                                                                                                                                                       | Rousseaux J et al. | 6215190 | Not a renal disease focus |
| 21 |                                                                                                                                                                                                                     |                    |         |                           |
| 22 | 1 Allotypes of properdin factor B(Bf) and lymphocytotoxic antibody production.                                                                                                                                      | Davidson JA et al. | 6399879 | Not a renal disease focus |
| 23 |                                                                                                                                                                                                                     |                    |         |                           |
| 24 |                                                                                                                                                                                                                     |                    |         |                           |
| 25 | 1 Control of serum C3 levels by beta 1H and C3b inactivator.                                                                                                                                                        | Wyatt RJ et al.    | 6445926 | Not a renal disease focus |
| 26 |                                                                                                                                                                                                                     |                    |         |                           |
| 27 | 1 Leukocyte beta-glucosidase in homozygotes and heterozygotes for Gaucher disease.                                                                                                                                  | Raghavan SS et al. | 6770675 | Not a renal disease focus |
| 28 |                                                                                                                                                                                                                     |                    |         |                           |
| 29 |                                                                                                                                                                                                                     |                    |         |                           |
| 30 | 1 Structural organization of the human neuronal nitric oxide synthase gene (NOS1).                                                                                                                                  | Hall AV et al.     | 7528745 | Not a renal disease focus |
| 31 |                                                                                                                                                                                                                     |                    |         |                           |
| 32 | 1 Analysis of meningiomas by methylation- and transcription-based clonality assays.                                                                                                                                 | Zhu J et al.       | 7641206 | Not a renal disease focus |
| 33 |                                                                                                                                                                                                                     |                    |         |                           |
| 34 | 1 Cytochrome P4501A1 gene polymorphism and homozygous deletion of the glutathione S-transferase M1 gene in urothelial cancer patients.                                                                              | Katoh T et al.     | 7697828 | Not a renal disease focus |
| 35 |                                                                                                                                                                                                                     |                    |         |                           |
| 36 | 1 Distribution of MHC class II alleles in primary systemic vasculitis.                                                                                                                                              | Zhang L et al.     | 7731160 | Not a renal disease focus |
| 37 |                                                                                                                                                                                                                     |                    |         |                           |
| 38 |                                                                                                                                                                                                                     |                    |         |                           |
| 39 |                                                                                                                                                                                                                     |                    |         |                           |
| 40 |                                                                                                                                                                                                                     |                    |         |                           |
| 41 |                                                                                                                                                                                                                     |                    |         |                           |
| 42 |                                                                                                                                                                                                                     |                    |         |                           |
| 43 |                                                                                                                                                                                                                     |                    |         |                           |
| 44 |                                                                                                                                                                                                                     |                    |         |                           |
| 45 |                                                                                                                                                                                                                     |                    |         |                           |
| 46 |                                                                                                                                                                                                                     |                    |         |                           |

|    |                                                                                                                                                                     |                                                                                                                                                                                                         |                      |                           |                           |
|----|---------------------------------------------------------------------------------------------------------------------------------------------------------------------|---------------------------------------------------------------------------------------------------------------------------------------------------------------------------------------------------------|----------------------|---------------------------|---------------------------|
| 1  | Angiotensin-converting enzyme gene polymorphism has no influence on the circulating renin-angiotensin-aldosterone system or blood pressure in normotensive subjects | Lachurie ML et al.                                                                                                                                                                                      | 7796503              | Not a renal disease focus |                           |
| 2  |                                                                                                                                                                     |                                                                                                                                                                                                         |                      |                           |                           |
| 3  |                                                                                                                                                                     |                                                                                                                                                                                                         |                      |                           |                           |
| 4  |                                                                                                                                                                     |                                                                                                                                                                                                         |                      |                           |                           |
| 5  |                                                                                                                                                                     |                                                                                                                                                                                                         |                      |                           |                           |
| 6  | 1                                                                                                                                                                   | p53 mutations and MDM-2 amplification in renal cell cancers.                                                                                                                                            | Imai Y et al.        | 7824511                   | Not a renal disease focus |
| 7  |                                                                                                                                                                     |                                                                                                                                                                                                         |                      |                           |                           |
| 8  | 1                                                                                                                                                                   | Frequencies of variants of candidate genes in different age groups of hypertensives.                                                                                                                    | Zee RY et al.        | 7882587                   | Not a renal disease focus |
| 9  |                                                                                                                                                                     |                                                                                                                                                                                                         |                      |                           |                           |
| 10 |                                                                                                                                                                     |                                                                                                                                                                                                         |                      |                           |                           |
| 11 | 1                                                                                                                                                                   | Independent, marked associations of alleles of the insulin receptor and dipeptidyl carboxypeptidase-I genes with essential hypertension.                                                                | Morris BJ et al.     | 8104754                   | Not a renal disease focus |
| 12 |                                                                                                                                                                     |                                                                                                                                                                                                         |                      |                           |                           |
| 13 | 1                                                                                                                                                                   | Increased expression of vascular permeability factor (vascular endothelial growth factor) and its receptors in kidney and bladder carcinomas.                                                           | Brown LF et al.      | 8238242                   | Not a renal disease focus |
| 14 |                                                                                                                                                                     |                                                                                                                                                                                                         |                      |                           |                           |
| 15 | 1                                                                                                                                                                   | Alpha-1-proteinase inhibitor and pulmonary haemorrhage in systemic vasculitis.                                                                                                                          | O'Donoghue DJ et al. | 8296629                   | Not a renal disease focus |
| 16 |                                                                                                                                                                     |                                                                                                                                                                                                         |                      |                           |                           |
| 17 | 1                                                                                                                                                                   | Expression of NAD(P)H:quinone oxidoreductase and glutathione S-transferases alpha and pi in human renal cell carcinoma and in kidney cancer-derived cell lines.                                         | Eickelmann P et al.  | 8313512                   | Not a renal disease focus |
| 18 |                                                                                                                                                                     |                                                                                                                                                                                                         |                      |                           |                           |
| 19 | 1                                                                                                                                                                   | A homoallelic Gly317-->Asp mutation in ALPL causes the perinatal (lethal) form of hypophosphatasia in Canadian mennonites.                                                                              | Greenberg CR et al.  | 8406453                   | Not a renal disease focus |
| 20 |                                                                                                                                                                     |                                                                                                                                                                                                         |                      |                           |                           |
| 21 | 1                                                                                                                                                                   | Angiotensin converting enzyme (ACE) insertion/deletion (I/D) polymorphism, and diabetic retinopathy in subjects with IDDM and NIDDM.                                                                    | Nagi DK et al.       | 8582133                   | Not a renal disease focus |
| 22 |                                                                                                                                                                     |                                                                                                                                                                                                         |                      |                           |                           |
| 23 | 1                                                                                                                                                                   | Characterization of Gas6, a member of the superfamily of G domain-containing proteins, as a ligand for Rse and Axl.                                                                                     | Mark MR et al.       | 8621659                   | Not a renal disease focus |
| 24 |                                                                                                                                                                     |                                                                                                                                                                                                         |                      |                           |                           |
| 25 | 1                                                                                                                                                                   | C-antineutrophil cytoplasmic antibody positivity in vasculitis patients is associated with the Z allele of alpha-1-antitrypsin, and P-antineutrophil cytoplasmic antibody positivity with the S allele. | Griffith ME et al.   | 8671812                   | Not a renal disease focus |
| 26 |                                                                                                                                                                     |                                                                                                                                                                                                         |                      |                           |                           |
| 27 | 1                                                                                                                                                                   | Absence of mutations in parathyroid hormone (PTH)/PTH-related protein receptor complementary deoxyribonucleic acid in patients with pseudohypoparathyroidism type Ib.                                   | Fukumoto S et al.    | 8675577                   | Not a renal disease focus |
| 28 |                                                                                                                                                                     |                                                                                                                                                                                                         |                      |                           |                           |
| 29 | 1                                                                                                                                                                   | Deletion polymorphism of the angiotensin-converting enzyme gene is independently associated with left ventricular mass and geometric remodeling in systemic hypertension.                               | Gharavi AG et al.    | 8677872                   | Not a renal disease focus |
| 30 |                                                                                                                                                                     |                                                                                                                                                                                                         |                      |                           |                           |
| 31 |                                                                                                                                                                     |                                                                                                                                                                                                         |                      |                           |                           |
| 32 |                                                                                                                                                                     |                                                                                                                                                                                                         |                      |                           |                           |
| 33 |                                                                                                                                                                     |                                                                                                                                                                                                         |                      |                           |                           |
| 34 |                                                                                                                                                                     |                                                                                                                                                                                                         |                      |                           |                           |
| 35 |                                                                                                                                                                     |                                                                                                                                                                                                         |                      |                           |                           |
| 36 |                                                                                                                                                                     |                                                                                                                                                                                                         |                      |                           |                           |
| 37 |                                                                                                                                                                     |                                                                                                                                                                                                         |                      |                           |                           |
| 38 |                                                                                                                                                                     |                                                                                                                                                                                                         |                      |                           |                           |
| 39 |                                                                                                                                                                     |                                                                                                                                                                                                         |                      |                           |                           |
| 40 |                                                                                                                                                                     |                                                                                                                                                                                                         |                      |                           |                           |
| 41 |                                                                                                                                                                     |                                                                                                                                                                                                         |                      |                           |                           |
| 42 |                                                                                                                                                                     |                                                                                                                                                                                                         |                      |                           |                           |
| 43 |                                                                                                                                                                     |                                                                                                                                                                                                         |                      |                           |                           |
| 44 |                                                                                                                                                                     |                                                                                                                                                                                                         |                      |                           |                           |
| 45 |                                                                                                                                                                     |                                                                                                                                                                                                         |                      |                           |                           |
| 46 |                                                                                                                                                                     |                                                                                                                                                                                                         |                      |                           |                           |

|    |                                                                                                                                                                        |                                                                                                                                                                                                                            |                     |                           |                           |
|----|------------------------------------------------------------------------------------------------------------------------------------------------------------------------|----------------------------------------------------------------------------------------------------------------------------------------------------------------------------------------------------------------------------|---------------------|---------------------------|---------------------------|
| 1  | Azathioprine pharmacogenetics: the relationship between 6-thioguanine nucleotides and thiopurine methyltransferase in patients after heart and kidney transplantation. | Schutz E et al.                                                                                                                                                                                                            | 8721407             | Not a renal disease focus |                           |
| 2  |                                                                                                                                                                        |                                                                                                                                                                                                                            |                     |                           |                           |
| 3  |                                                                                                                                                                        |                                                                                                                                                                                                                            |                     |                           |                           |
| 4  |                                                                                                                                                                        |                                                                                                                                                                                                                            |                     |                           |                           |
| 5  |                                                                                                                                                                        |                                                                                                                                                                                                                            |                     |                           |                           |
| 6  |                                                                                                                                                                        |                                                                                                                                                                                                                            |                     |                           |                           |
| 7  |                                                                                                                                                                        |                                                                                                                                                                                                                            |                     |                           |                           |
| 8  | 1                                                                                                                                                                      | Examination of the role of nitric oxide synthase and renal kallikrein as candidate genes for essential hypertension.                                                                                                       | Friend LR et al.    | 8800585                   | Not a renal disease focus |
| 9  |                                                                                                                                                                        |                                                                                                                                                                                                                            |                     |                           |                           |
| 10 | 1                                                                                                                                                                      | Genetic risk for renal artery stenosis: association with deletion polymorphism in angiotensin 1-converting enzyme gene.                                                                                                    | Missouris CG et al. | 8821841                   | Not a renal disease focus |
| 11 |                                                                                                                                                                        |                                                                                                                                                                                                                            |                     |                           |                           |
| 12 | 1                                                                                                                                                                      | Chromosome 11p15.5 regional imprinting: comparative analysis of KIP2 and H19 in human tissues and Wilms' tumors.                                                                                                           | Chung WY et al.     | 8842727                   | Not a renal disease focus |
| 13 |                                                                                                                                                                        |                                                                                                                                                                                                                            |                     |                           |                           |
| 14 | 1                                                                                                                                                                      | Germline mutations in glial cell line-derived neurotrophic factor (GDNF) and RET in a Hirschsprung disease patient.                                                                                                        | Angrist M et al.    | 8896568                   | Not a renal disease focus |
| 15 |                                                                                                                                                                        |                                                                                                                                                                                                                            |                     |                           |                           |
| 16 | 1                                                                                                                                                                      | Germline mutations of the RET ligand GDNF are not sufficient to cause Hirschsprung disease.                                                                                                                                | Salomon R et al.    | 8896569                   | Not a renal disease focus |
| 17 |                                                                                                                                                                        |                                                                                                                                                                                                                            |                     |                           |                           |
| 18 |                                                                                                                                                                        |                                                                                                                                                                                                                            |                     |                           |                           |
| 19 | 1                                                                                                                                                                      | Increased expression of the insulin-like growth factor-II gene in Wilms' tumor is not dependent on loss of genomic imprinting or loss of heterozygosity.                                                                   | Wang WH et al.      | 8910385                   | Not a renal disease focus |
| 20 |                                                                                                                                                                        |                                                                                                                                                                                                                            |                     |                           |                           |
| 21 | 1                                                                                                                                                                      | Genetic analysis of the NAT2 and CYP2D6 polymorphisms in white patients with non-insulin-dependent diabetes mellitus.                                                                                                      | Agundez JA et al.   | 8946479                   | Not a renal disease focus |
| 22 |                                                                                                                                                                        |                                                                                                                                                                                                                            |                     |                           |                           |
| 23 | 1                                                                                                                                                                      | Renal cell carcinoma of end-stage renal disease: a histopathologic and molecular genetic study.                                                                                                                            | Hughson MD et al.   | 8959640                   | Not a renal disease focus |
| 24 |                                                                                                                                                                        |                                                                                                                                                                                                                            |                     |                           |                           |
| 25 | 1                                                                                                                                                                      | Reduced expression of the cyclin-dependent kinase inhibitor gene p57KIP2 in Wilms' tumor.                                                                                                                                  | Thompson JS et al.  | 8971182                   | Not a renal disease focus |
| 26 |                                                                                                                                                                        |                                                                                                                                                                                                                            |                     |                           |                           |
| 27 | 1                                                                                                                                                                      | Angiotensin converting enzyme gene polymorphism and renal hemodynamic function in early diabetes.                                                                                                                          | Miller JA et al.    | 8995725                   | Not a renal disease focus |
| 28 |                                                                                                                                                                        |                                                                                                                                                                                                                            |                     |                           |                           |
| 29 | 1                                                                                                                                                                      | Somatic inactivation of the VHL gene in Von Hippel-Lindau disease tumors.                                                                                                                                                  | Prowse AH et al.    | 9106522                   | Not a renal disease focus |
| 30 |                                                                                                                                                                        |                                                                                                                                                                                                                            |                     |                           |                           |
| 31 | 1                                                                                                                                                                      | Association of diabetic neuropathy with Na/K ATPase gene polymorphism.                                                                                                                                                     | Vague P et al.      | 9165217                   | Not a renal disease focus |
| 32 |                                                                                                                                                                        |                                                                                                                                                                                                                            |                     |                           |                           |
| 33 | 1                                                                                                                                                                      | Angiotensin I-converting enzyme and angiotensinogen gene polymorphisms in non-insulin-dependent diabetes mellitus. Lack of relationship with diabetic nephropathy and retinopathy in a Caucasian Mediterranean population. | Gutierrez C et al.  | 9258285                   | Not a renal disease focus |
| 34 |                                                                                                                                                                        |                                                                                                                                                                                                                            |                     |                           |                           |
| 35 |                                                                                                                                                                        |                                                                                                                                                                                                                            |                     |                           |                           |
| 36 |                                                                                                                                                                        |                                                                                                                                                                                                                            |                     |                           |                           |
| 37 |                                                                                                                                                                        |                                                                                                                                                                                                                            |                     |                           |                           |
| 38 |                                                                                                                                                                        |                                                                                                                                                                                                                            |                     |                           |                           |
| 39 |                                                                                                                                                                        |                                                                                                                                                                                                                            |                     |                           |                           |
| 40 |                                                                                                                                                                        |                                                                                                                                                                                                                            |                     |                           |                           |
| 41 |                                                                                                                                                                        |                                                                                                                                                                                                                            |                     |                           |                           |
| 42 |                                                                                                                                                                        |                                                                                                                                                                                                                            |                     |                           |                           |
| 43 |                                                                                                                                                                        |                                                                                                                                                                                                                            |                     |                           |                           |
| 44 |                                                                                                                                                                        |                                                                                                                                                                                                                            |                     |                           |                           |
| 45 |                                                                                                                                                                        |                                                                                                                                                                                                                            |                     |                           |                           |
| 46 |                                                                                                                                                                        |                                                                                                                                                                                                                            |                     |                           |                           |

|    |   |                                                                                                                                                                 |                   |         |                           |
|----|---|-----------------------------------------------------------------------------------------------------------------------------------------------------------------|-------------------|---------|---------------------------|
| 1  |   |                                                                                                                                                                 |                   |         |                           |
| 2  |   |                                                                                                                                                                 |                   |         |                           |
| 3  |   |                                                                                                                                                                 |                   |         |                           |
| 4  | 1 | Influence of polymorphisms of GSTM1 and GSTT1 for risk of renal cell cancer in workers with long-term high occupational exposure to trichloroethene.            | Bruning T et al.  | 9285043 | Not a renal disease focus |
| 5  | 1 | FHIT gene and the FRA3B region are not involved in the genetics of renal cell carcinomas.                                                                       | Bugert P et al.   | 9290948 | Not a renal disease focus |
| 6  | 1 | Isolation and characterization of UGT2B15(Y85): a UDP-glucuronosyltransferase encoded by a polymorphic gene.                                                    | Levesque E et al. | 9295060 | Not a renal disease focus |
| 7  | 1 | Analyses of mutations in the human renal kallikrein (hKLK1) gene and their possible relevance to blood pressure regulation and risk of myocardial infarction.   | Berge KE et al.   | 9298743 | Not a renal disease focus |
| 8  | 1 | Coding mutations in p57KIP2 are present in some cases of Beckwith-Wiedemann syndrome but are rare or absent in Wilms tumors.                                    | O'Keefe D et al.  | 9311733 | Not a renal disease focus |
| 9  | 1 | Loss of heterozygosity of the nm23-H1 gene in human renal cell carcinomas.                                                                                      | Bosnar MH et al.  | 9341897 | Not a renal disease focus |
| 10 | 1 | Biological monitoring of workers exposed to low levels of 2-butoxyethanol.                                                                                      | Haufroid V et al. | 9342622 | Not a renal disease focus |
| 11 | 1 | Renal ACE immunohistochemical localization in NIDDM patients with nephropathy.                                                                                  | Mizuiru S et al.  | 9469501 | Not a renal disease focus |
| 12 | 1 | The Captopril Prevention Project (CAPPP) in hypertension--baseline data and current status.                                                                     | Hansson L et al.  | 9495662 | Not a renal disease focus |
| 13 | 1 | Angiotensin I-converting enzyme gene polymorphism modulates the consequences of in utero growth retardation on plasma insulin in young adults.                  | Cambien F et al.  | 9519756 | Not a renal disease focus |
| 14 | 1 | Contribution of angiotensin I converting enzyme gene polymorphism and angiotensinogen gene polymorphism to blood pressure regulation in essential hypertension. | Mondorf UF et al. | 9524045 | Not a renal disease focus |
| 15 | 1 | Evidence of association of the ecNOS gene polymorphism with plasma NO metabolite levels in humans.                                                              | Tsukada T et al.  | 9535806 | Not a renal disease focus |
| 16 | 1 | Human GFRA1: cloning, mapping, genomic structure, and evaluation as a candidate gene for Hirschsprung disease susceptibility.                                   | Angrist M et al.  | 9545641 | Not a renal disease focus |
| 17 | 1 | Serum paraoxonase activity and its relationship to diabetic complications in patients with non-insulin-dependent diabetes mellitus.                             | Ikeda Y et al.    | 9591753 | Not a renal disease focus |
| 18 |   |                                                                                                                                                                 |                   |         |                           |
| 19 |   |                                                                                                                                                                 |                   |         |                           |
| 20 |   |                                                                                                                                                                 |                   |         |                           |
| 21 |   |                                                                                                                                                                 |                   |         |                           |
| 22 |   |                                                                                                                                                                 |                   |         |                           |
| 23 |   |                                                                                                                                                                 |                   |         |                           |
| 24 |   |                                                                                                                                                                 |                   |         |                           |
| 25 |   |                                                                                                                                                                 |                   |         |                           |
| 26 |   |                                                                                                                                                                 |                   |         |                           |
| 27 |   |                                                                                                                                                                 |                   |         |                           |
| 28 |   |                                                                                                                                                                 |                   |         |                           |
| 29 |   |                                                                                                                                                                 |                   |         |                           |
| 30 |   |                                                                                                                                                                 |                   |         |                           |
| 31 |   |                                                                                                                                                                 |                   |         |                           |
| 32 |   |                                                                                                                                                                 |                   |         |                           |
| 33 |   |                                                                                                                                                                 |                   |         |                           |
| 34 |   |                                                                                                                                                                 |                   |         |                           |
| 35 |   |                                                                                                                                                                 |                   |         |                           |
| 36 |   |                                                                                                                                                                 |                   |         |                           |
| 37 |   |                                                                                                                                                                 |                   |         |                           |
| 38 |   |                                                                                                                                                                 |                   |         |                           |
| 39 |   |                                                                                                                                                                 |                   |         |                           |
| 40 |   |                                                                                                                                                                 |                   |         |                           |
| 41 |   |                                                                                                                                                                 |                   |         |                           |
| 42 |   |                                                                                                                                                                 |                   |         |                           |
| 43 |   |                                                                                                                                                                 |                   |         |                           |
| 44 |   |                                                                                                                                                                 |                   |         |                           |
| 45 |   |                                                                                                                                                                 |                   |         |                           |
| 46 |   |                                                                                                                                                                 |                   |         |                           |



|    |                                                                                                                                                                                                                          |                     |         |                           |
|----|--------------------------------------------------------------------------------------------------------------------------------------------------------------------------------------------------------------------------|---------------------|---------|---------------------------|
| 1  | Inhibition by platelet-activating factor of Src- and hepatocyte growth factor-dependent invasiveness of intestinal and kidney epithelial cells. Phosphatidylinositol 3'-kinase is a critical mediator of tumor invasion. | Kotelevets L et al. | 9603913 | Not a renal disease focus |
| 2  |                                                                                                                                                                                                                          |                     |         |                           |
| 3  |                                                                                                                                                                                                                          |                     |         |                           |
| 4  |                                                                                                                                                                                                                          |                     |         |                           |
| 5  |                                                                                                                                                                                                                          |                     |         |                           |
| 6  |                                                                                                                                                                                                                          |                     |         |                           |
| 7  |                                                                                                                                                                                                                          |                     |         |                           |
| 8  |                                                                                                                                                                                                                          |                     |         |                           |
| 9  |                                                                                                                                                                                                                          |                     |         |                           |
| 10 |                                                                                                                                                                                                                          |                     |         |                           |
| 11 |                                                                                                                                                                                                                          |                     |         |                           |
| 12 |                                                                                                                                                                                                                          |                     |         |                           |
| 13 |                                                                                                                                                                                                                          |                     |         |                           |
| 14 |                                                                                                                                                                                                                          |                     |         |                           |
| 15 |                                                                                                                                                                                                                          |                     |         |                           |
| 16 |                                                                                                                                                                                                                          |                     |         |                           |
| 17 |                                                                                                                                                                                                                          |                     |         |                           |
| 18 |                                                                                                                                                                                                                          |                     |         |                           |
| 19 |                                                                                                                                                                                                                          |                     |         |                           |
| 20 |                                                                                                                                                                                                                          |                     |         |                           |
| 21 |                                                                                                                                                                                                                          |                     |         |                           |
| 22 |                                                                                                                                                                                                                          |                     |         |                           |
| 23 |                                                                                                                                                                                                                          |                     |         |                           |
| 24 |                                                                                                                                                                                                                          |                     |         |                           |
| 25 |                                                                                                                                                                                                                          |                     |         |                           |
| 26 |                                                                                                                                                                                                                          |                     |         |                           |
| 27 |                                                                                                                                                                                                                          |                     |         |                           |
| 28 |                                                                                                                                                                                                                          |                     |         |                           |
| 29 |                                                                                                                                                                                                                          |                     |         |                           |
| 30 |                                                                                                                                                                                                                          |                     |         |                           |
| 31 |                                                                                                                                                                                                                          |                     |         |                           |
| 32 |                                                                                                                                                                                                                          |                     |         |                           |
| 33 |                                                                                                                                                                                                                          |                     |         |                           |
| 34 |                                                                                                                                                                                                                          |                     |         |                           |
| 35 |                                                                                                                                                                                                                          |                     |         |                           |
| 36 |                                                                                                                                                                                                                          |                     |         |                           |
| 37 |                                                                                                                                                                                                                          |                     |         |                           |
| 38 |                                                                                                                                                                                                                          |                     |         |                           |
| 39 |                                                                                                                                                                                                                          |                     |         |                           |
| 40 |                                                                                                                                                                                                                          |                     |         |                           |
| 41 |                                                                                                                                                                                                                          |                     |         |                           |
| 42 |                                                                                                                                                                                                                          |                     |         |                           |
| 43 |                                                                                                                                                                                                                          |                     |         |                           |
| 44 |                                                                                                                                                                                                                          |                     |         |                           |
| 45 |                                                                                                                                                                                                                          |                     |         |                           |
| 46 |                                                                                                                                                                                                                          |                     |         |                           |



|    |   |                                                                                                                                                                                                                                                                                                        |                           |          |                           |
|----|---|--------------------------------------------------------------------------------------------------------------------------------------------------------------------------------------------------------------------------------------------------------------------------------------------------------|---------------------------|----------|---------------------------|
| 1  | 1 | G-Protein beta3 subunit C825T variant and ambulatory blood pressure in essential hypertension.                                                                                                                                                                                                         | Beige J et al.            | 10205246 | Not a renal disease focus |
| 2  | 1 | Novel mutations in the 1alpha-hydroxylase (P450c1) gene in three families with pseudovitamin D-deficiency rickets resulting in loss of functional enzyme activity in blood-derived macrophages.                                                                                                        | Smith SJ et al.           | 10320521 | Not a renal disease focus |
| 3  | 1 | Gene structure, chromosomal location, and expression pattern of maleylacetoacetate isomerase.                                                                                                                                                                                                          | Fernandez-Canon JM et al. | 10373324 | Not a renal disease focus |
| 4  | 1 | Candidate genetic modifiers of individual susceptibility to renal cell carcinoma: a study of polymorphic human xenobiotic-metabolizing enzymes.                                                                                                                                                        | Longuemaux S et al.       | 10383153 | Not a renal disease focus |
| 5  | 1 | Absence of PTEN germ-line mutations in men with a potential inherited predisposition to prostate cancer.                                                                                                                                                                                               | Cooney KA et al.          | 10389923 | Not a renal disease focus |
| 6  | 1 | Increased fragmentation of von Willebrand factor, due to abnormal cleavage of the subunit, parallels disease activity in recurrent hemolytic uremic syndrome and thrombotic thrombocytopenic purpura and discloses predisposition in families. The Italian Registry of Familial and Recurrent HUS/TTP. | Galbusera M et al.        | 10397728 | Not a renal disease focus |
| 7  | 1 | Mutations of the VHL gene in sporadic renal cell carcinoma: definition of a risk factor for VHL patients to develop an RCC.                                                                                                                                                                            | Gallou C et al.           | 10408776 | Not a renal disease focus |
| 8  | 1 | Novel somatic mutations in the VHL gene in Swedish archived sporadic renal cell carcinomas.                                                                                                                                                                                                            | Yang K et al.             | 10454237 | Not a renal disease focus |
| 9  | 1 | The gene encoding hydroxypyruvate reductase (GRHPR) is mutated in patients with primary hyperoxaluria type II.                                                                                                                                                                                         | Cramer SD et al.          | 10484776 | Not a renal disease focus |
| 10 | 1 | Carotid intima-media thickness and ACE-gene polymorphism in hemodialysis patients.                                                                                                                                                                                                                     | Nergizoglu G et al.       | 10493570 | Not a renal disease focus |
| 11 | 1 | Telomerase activity and telomere lengths: alterations in renal cell carcinomas.                                                                                                                                                                                                                        | Dahse R et al.            | 10504477 | Not a renal disease focus |
| 12 | 1 | Genotyping and functional analysis of a polymorphic (CCTTT)(n) repeat of NOS2A in diabetic retinopathy.                                                                                                                                                                                                | Warpeha KM et al.         | 10506586 | Not a renal disease focus |
| 13 | 1 | Molecular basis of human salt sensitivity: the role of the 11beta-hydroxysteroid dehydrogenase type 2.                                                                                                                                                                                                 | Lovati E et al.           | 10523024 | Not a renal disease focus |

|    |                                                                                               |                                                                                                                                                   |                       |                           |                           |
|----|-----------------------------------------------------------------------------------------------|---------------------------------------------------------------------------------------------------------------------------------------------------|-----------------------|---------------------------|---------------------------|
| 1  | Genetic polymorphisms of the renin-angiotensin system and atheromatous renal artery stenosis. | Olivieri O et al.                                                                                                                                 | 10567188              | Not a renal disease focus |                           |
| 2  |                                                                                               |                                                                                                                                                   |                       |                           |                           |
| 3  |                                                                                               |                                                                                                                                                   |                       |                           |                           |
| 4  |                                                                                               |                                                                                                                                                   |                       |                           |                           |
| 5  |                                                                                               |                                                                                                                                                   |                       |                           |                           |
| 6  | 1                                                                                             | Molecular characterization of the human PEA15 gene on 1q21-q22 and association with type 2 diabetes mellitus in Pima Indians.                     | Wolford JK et al.     | 10607908                  | Not a renal disease focus |
| 7  |                                                                                               |                                                                                                                                                   |                       |                           |                           |
| 8  | 1                                                                                             | Somatic mutation and homozygous deletion of PTEN/MMAC1 gene of 10q23 in renal cell carcinoma.                                                     | Alimov A et al.       | 10628321                  | Not a renal disease focus |
| 9  |                                                                                               |                                                                                                                                                   |                       |                           |                           |
| 10 | 1                                                                                             | No association between deletion-type angiotensin-converting enzyme gene polymorphism and left-ventricular hypertrophy in hemodialysis patients.   | Yildiz A et al.       | 10657713                  | Not a renal disease focus |
| 11 |                                                                                               |                                                                                                                                                   |                       |                           |                           |
| 12 | 1                                                                                             | Analysis of point mutation in exon 2 of CYP2E1 gene in renal cell/urothelial cancer patients in comparison with control population.               | Farker K et al.       | 10667834                  | Not a renal disease focus |
| 13 |                                                                                               |                                                                                                                                                   |                       |                           |                           |
| 14 | 1                                                                                             | Association between diabetic retinopathy and genetic variations in alpha2beta1 integrin, a platelet receptor for collagen.                        | Matsubara Y et al.    | 10688808                  | Not a renal disease focus |
| 15 |                                                                                               |                                                                                                                                                   |                       |                           |                           |
| 16 | 1                                                                                             | Lys(173)Arg and -344T/C variants of CYP11B2 in Japanese patients with low-renin hypertension.                                                     | Komiya I et al.       | 10720581                  | Not a renal disease focus |
| 17 |                                                                                               |                                                                                                                                                   |                       |                           |                           |
| 18 | 1                                                                                             | Synergistic effect of alpha-adducin and ACE genes causes blood pressure changes with body sodium and volume expansion.                            | Barlassina C et al.   | 10720960                  | Not a renal disease focus |
| 19 |                                                                                               |                                                                                                                                                   |                       |                           |                           |
| 20 | 1                                                                                             | Somatic mutations of the MET oncogene are selected during metastatic spread of human HNSC carcinomas.                                             | Di Renzo MF et al.    | 10734314                  | Not a renal disease focus |
| 21 |                                                                                               |                                                                                                                                                   |                       |                           |                           |
| 22 | 1                                                                                             | Identification of fifteen novel PHEX gene mutations in Finnish patients with hypophosphatemic rickets.                                            | Tynnismaa H et al.    | 10737991                  | Not a renal disease focus |
| 23 |                                                                                               |                                                                                                                                                   |                       |                           |                           |
| 24 | 1                                                                                             | Abnormal RNA expression of 11p15 imprinted genes and kidney developmental genes in Wilms' tumor.                                                  | Schwiebacher C et al. | 10749116                  | Not a renal disease focus |
| 25 |                                                                                               |                                                                                                                                                   |                       |                           |                           |
| 26 | 1                                                                                             | VHL alterations in human clear cell renal cell carcinoma: association with advanced tumor stage and a novel hot spot mutation.                    | Brauch H et al.       | 10766184                  | Not a renal disease focus |
| 27 |                                                                                               |                                                                                                                                                   |                       |                           |                           |
| 28 | 1                                                                                             | An insertion/deletion polymorphism in intron 18 of the type B human natriuretic peptide receptor gene is not associated with cerebral infarction. | Rahmutula D et al.    | 10770265                  | Not a renal disease focus |
| 29 |                                                                                               |                                                                                                                                                   |                       |                           |                           |
| 30 | 1                                                                                             | Glutathione S-transferase M1, T1, and P1 polymorphisms as risk factors for renal cell carcinoma: a case-control study.                            | Sweeney C et al.      | 10794492                  | Not a renal disease focus |
| 31 |                                                                                               |                                                                                                                                                   |                       |                           |                           |
| 32 | 1                                                                                             | Familial clear cell renal cell carcinoma (FCRC): clinical features and mutation analysis of the VHL, MET, and CUL2 candidate genes.               | Woodward ER et al.    | 10807693                  | Not a renal disease focus |
| 33 |                                                                                               |                                                                                                                                                   |                       |                           |                           |
| 34 |                                                                                               |                                                                                                                                                   |                       |                           |                           |
| 35 |                                                                                               |                                                                                                                                                   |                       |                           |                           |
| 36 |                                                                                               |                                                                                                                                                   |                       |                           |                           |
| 37 |                                                                                               |                                                                                                                                                   |                       |                           |                           |
| 38 |                                                                                               |                                                                                                                                                   |                       |                           |                           |
| 39 |                                                                                               |                                                                                                                                                   |                       |                           |                           |
| 40 |                                                                                               |                                                                                                                                                   |                       |                           |                           |
| 41 |                                                                                               |                                                                                                                                                   |                       |                           |                           |
| 42 |                                                                                               |                                                                                                                                                   |                       |                           |                           |
| 43 |                                                                                               |                                                                                                                                                   |                       |                           |                           |
| 44 |                                                                                               |                                                                                                                                                   |                       |                           |                           |
| 45 |                                                                                               |                                                                                                                                                   |                       |                           |                           |
| 46 |                                                                                               |                                                                                                                                                   |                       |                           |                           |

|    |   |                                                                                                                                                               |                          |          |                           |
|----|---|---------------------------------------------------------------------------------------------------------------------------------------------------------------|--------------------------|----------|---------------------------|
| 1  | 1 | Trisomy 4 leading to duplication of a mutated KIT allele in acute myeloid leukemia with mast cell involvement.                                                | Beghini A et al.         | 10812167 | Not a renal disease focus |
| 2  | 1 | Distribution of different HLA antigens in Greek hypertensives according to the angiotensin-converting enzyme genotype.                                        | Diamantopoulos EJ et al. | 10821349 | Not a renal disease focus |
| 3  | 1 | Angiotensin-converting enzyme gene I/D polymorphism in malignant hypertension.                                                                                | Stefansson B et al.      | 10855732 | Not a renal disease focus |
| 4  | 1 | An intron 4 gene polymorphism in endothelial cell nitric oxide synthase might modulate volume-dependent hypertension in patients on hemodialysis.             | Yokoyama K et al.        | 10867538 | Not a renal disease focus |
| 5  | 1 | Elevated urinary albumin excretion is not linked to the angiotensin I-converting enzyme gene polymorphism in clinically healthy subjects.                     | Clausen P et al.         | 10872702 | Not a renal disease focus |
| 6  | 1 | Functional analyses of amino acid substitutions Arg883Ser and Asp905Tyr of protein phosphatase-1 G-subunit.                                                   | Permana PA et al.        | 10873397 | Not a renal disease focus |
| 7  | 1 | Functional synergism between the most common polymorphism in human alanine:glyoxylate aminotransferase and four of the most common disease-causing mutations. | Lumb MJ et al.           | 10960483 | Not a renal disease focus |
| 8  | 1 | G-protein beta(3)-subunit C825T genotype and nephropathy in diabetes mellitus.                                                                                | Beige J et al.           | 10978395 | Not a renal disease focus |
| 9  | 1 | Alterations of the DNA repair gene OGG1 in human clear cell carcinomas of the kidney.                                                                         | Audebert M et al.        | 10987279 | Not a renal disease focus |
| 10 | 1 | Missense mutation of the MET gene detected in human glioma.                                                                                                   | Moon YW et al.           | 11007037 | Not a renal disease focus |
| 11 | 1 | Renal outcome and vascular morbidity in systemic lupus erythematosus (SLE): lack of association with the angiotensin-converting enzyme gene polymorphism.     | Molad Y et al.           | 11071585 | Not a renal disease focus |
| 12 | 1 | Serum arylesterase/diazoxonase activity and genetic polymorphisms in patients with type 2 diabetes.                                                           | Inoue M et al.           | 11092501 | Not a renal disease focus |
| 13 | 1 | Detection of the association between a deletion polymorphism in the gene encoding angiotensin I-converting enzyme and advanced diabetic retinopathy.          | Matsumoto A et al.       | 11106834 | Not a renal disease focus |
| 14 | 1 | Proteinase 3 gene polymorphisms and Wegener's granulomatosis.                                                                                                 | Gencik M et al.          | 11115080 | Not a renal disease focus |

|    |                                                                                            |                                                                                                                                                                                            |                           |                           |                           |
|----|--------------------------------------------------------------------------------------------|--------------------------------------------------------------------------------------------------------------------------------------------------------------------------------------------|---------------------------|---------------------------|---------------------------|
| 1  | alpha-adducin and angiotensin I-converting enzyme polymorphisms in essential hypertension. | Clark CJ et al.                                                                                                                                                                            | 11116113                  | Not a renal disease focus |                           |
| 2  |                                                                                            |                                                                                                                                                                                            |                           |                           |                           |
| 3  |                                                                                            |                                                                                                                                                                                            |                           |                           |                           |
| 4  | 1                                                                                          | Alleviating transcript insufficiency caused by Friedreich's ataxia triplet repeats.                                                                                                        | Grabczyk E et al.         | 11121484                  | Not a renal disease focus |
| 5  |                                                                                            |                                                                                                                                                                                            |                           |                           |                           |
| 6  |                                                                                            |                                                                                                                                                                                            |                           |                           |                           |
| 7  | 1                                                                                          | Glutathione transferase activities in renal carcinomas and adjacent normal renal tissues: factors influencing renal carcinogenesis induced by xenobiotics.                                 | Delbanco EH et al.        | 11218045                  | Not a renal disease focus |
| 8  |                                                                                            |                                                                                                                                                                                            |                           |                           |                           |
| 9  |                                                                                            |                                                                                                                                                                                            |                           |                           |                           |
| 10 | 1                                                                                          | Random mutagenesis-PCR to introduce alterations into defined DNA sequences for validation of SNP and mutation detection methods.                                                           | Nickerson ML et al.       | 11241843                  | Not a renal disease focus |
| 11 |                                                                                            |                                                                                                                                                                                            |                           |                           |                           |
| 12 |                                                                                            |                                                                                                                                                                                            |                           |                           |                           |
| 13 | 1                                                                                          | Gain-of-function mutation at the extracellular domain of KIT in gastrointestinal stromal tumours.                                                                                          | Hirota S et al.           | 11276010                  | Not a renal disease focus |
| 14 |                                                                                            |                                                                                                                                                                                            |                           |                           |                           |
| 15 | 1                                                                                          | Gene-environment interactions in renal cell carcinoma.                                                                                                                                     | Semenza JC et al.         | 11323315                  | Not a renal disease focus |
| 16 |                                                                                            |                                                                                                                                                                                            |                           |                           |                           |
| 17 | 1                                                                                          | von Hippel-Lindau protein mutants linked to type 2C VHL disease preserve the ability to downregulate HIF.                                                                                  | Hoffman MA et al.         | 11331612                  | Not a renal disease focus |
| 18 |                                                                                            |                                                                                                                                                                                            |                           |                           |                           |
| 19 |                                                                                            |                                                                                                                                                                                            |                           |                           |                           |
| 20 | 1                                                                                          | Association of angiotensinogen M235T and A(-6)G gene polymorphisms with coronary heart disease with independence of essential hypertension: the PROCAGENE study. Prospective Cardiac Gene. | Rodriguez-Perez JC et al. | 11345362                  | Not a renal disease focus |
| 21 |                                                                                            |                                                                                                                                                                                            |                           |                           |                           |
| 22 |                                                                                            |                                                                                                                                                                                            |                           |                           |                           |
| 23 | 1                                                                                          | Cholesteryl ester transfer protein polymorphism associated with macroangiopathy in Japanese patients with type 2 diabetes.                                                                 | Meguro S et al.           | 11369008                  | Not a renal disease focus |
| 24 |                                                                                            |                                                                                                                                                                                            |                           |                           |                           |
| 25 | 1                                                                                          | Mixed epithelial and stromal tumor of the kidney lacks the genetic alterations of cellular congenital mesoblastic nephroma.                                                                | Pierson CR et al.         | 11381370                  | Not a renal disease focus |
| 26 |                                                                                            |                                                                                                                                                                                            |                           |                           |                           |
| 27 | 1                                                                                          | Increased D allele frequency of the angiotensin-converting enzyme gene in pulmonary fibrosis.                                                                                              | Morrison CD et al.        | 11381371                  | Not a renal disease focus |
| 28 |                                                                                            |                                                                                                                                                                                            |                           |                           |                           |
| 29 |                                                                                            |                                                                                                                                                                                            |                           |                           |                           |
| 30 | 1                                                                                          | Class II HLA associations with autoantibodies in scleroderma: a highly significant role for HLA-DP.                                                                                        | Gilchrist FC et al.       | 11393660                  | Not a renal disease focus |
| 31 |                                                                                            |                                                                                                                                                                                            |                           |                           |                           |
| 32 | 1                                                                                          | IRAK1b, a novel alternative splice variant of interleukin-1 receptor-associated kinase (IRAK), mediates interleukin-1 signaling and has prolonged stability.                               | Jensen LE et al.          | 11397809                  | Not a renal disease focus |
| 33 |                                                                                            |                                                                                                                                                                                            |                           |                           |                           |
| 34 | 1                                                                                          | Cancer risk in heterozygotes for ataxia-telangiectasia.                                                                                                                                    | Geoffroy-Perez B et al.   | 11410879                  | Not a renal disease focus |
| 35 |                                                                                            |                                                                                                                                                                                            |                           |                           |                           |
| 36 | 1                                                                                          | VHL c.505 T>C mutation confers a high age related penetrance but no increased overall mortality.                                                                                           | Bender BU et al.          | 11483638                  | Not a renal disease focus |
| 37 |                                                                                            |                                                                                                                                                                                            |                           |                           |                           |
| 38 |                                                                                            |                                                                                                                                                                                            |                           |                           |                           |
| 39 |                                                                                            |                                                                                                                                                                                            |                           |                           |                           |
| 40 |                                                                                            |                                                                                                                                                                                            |                           |                           |                           |
| 41 |                                                                                            |                                                                                                                                                                                            |                           |                           |                           |
| 42 |                                                                                            |                                                                                                                                                                                            |                           |                           |                           |
| 43 |                                                                                            |                                                                                                                                                                                            |                           |                           |                           |
| 44 |                                                                                            |                                                                                                                                                                                            |                           |                           |                           |
| 45 |                                                                                            |                                                                                                                                                                                            |                           |                           |                           |
| 46 |                                                                                            |                                                                                                                                                                                            |                           |                           |                           |

|    |                                                                                  |                                                                                                                                                        |                    |                           |                           |
|----|----------------------------------------------------------------------------------|--------------------------------------------------------------------------------------------------------------------------------------------------------|--------------------|---------------------------|---------------------------|
| 1  | Angiotensin-converting enzyme gene polymorphism in patients with systemic lupus. | Prkacin I et al.                                                                                                                                       | 11505631           | Not a renal disease focus |                           |
| 2  |                                                                                  |                                                                                                                                                        |                    |                           |                           |
| 3  |                                                                                  |                                                                                                                                                        |                    |                           |                           |
| 4  | 1                                                                                | Polymorphism screening of the insulin receptor-related receptor gene (INSRR) on 1q in Pima Indians.                                                    | Wolford JK et al.  | 11513557                  | Not a renal disease focus |
| 5  |                                                                                  |                                                                                                                                                        |                    |                           |                           |
| 6  | 1                                                                                | The pVHL-associated SCF ubiquitin ligase complex: molecular genetic analysis of elongin B and C, Rbx1 and HIF-1alpha in renal cell carcinoma.          | Clifford SC et al. | 11526493                  | Not a renal disease focus |
| 7  |                                                                                  |                                                                                                                                                        |                    |                           |                           |
| 8  | 1                                                                                | Meningioma: a cytogenetic model of a complex benign human tumor, including data on 394 karyotyped cases.                                               | Zang KD            | 11528114                  | Not a renal disease focus |
| 9  |                                                                                  |                                                                                                                                                        |                    |                           |                           |
| 10 | 1                                                                                | Epigenetic inactivation of the RASSF1A 3p21.3 tumor suppressor gene in both clear cell and papillary renal cell carcinoma.                             | Morrissey C et al. | 11585766                  | Not a renal disease focus |
| 11 |                                                                                  |                                                                                                                                                        |                    |                           |                           |
| 12 | 1                                                                                | Crystal structures of NK1-heparin complexes reveal the basis for NK1 activity and enable engineering of potent agonists of the MET receptor.           | Lietha D et al.    | 11597998                  | Not a renal disease focus |
| 13 |                                                                                  |                                                                                                                                                        |                    |                           |                           |
| 14 | 1                                                                                | Detection of AGXT bgene mutations by denaturing high-performance liquid chromatography for diagnosis of hyperoxaluria type 1.                          | Pirulli D et al.   | 11699734                  | Not a renal disease focus |
| 15 |                                                                                  |                                                                                                                                                        |                    |                           |                           |
| 16 | 1                                                                                | Identification of six novel MYH9 mutations and genotype-phenotype relationships in autosomal dominant macrothrombocytopenia with leukocyte inclusions. | Kunishima S et al. | 11776386                  | Not a renal disease focus |
| 17 |                                                                                  |                                                                                                                                                        |                    |                           |                           |
| 18 | 1                                                                                | Biallelic inactivation of the von Hippel-Lindau tumor suppressor gene in sporadic renal cell carcinoma.                                                | Hamano K et al.    | 11792959                  | Not a renal disease focus |
| 19 |                                                                                  |                                                                                                                                                        |                    |                           |                           |
| 20 | 1                                                                                | Association of the D allele of the angiotensin I converting enzyme polymorphism with malignant vascular injury.                                        | Mayer NJ et al.    | 11836444                  | Not a renal disease focus |
| 21 |                                                                                  |                                                                                                                                                        |                    |                           |                           |
| 22 | 1                                                                                | Comprehensive mutational analysis of the VHL gene in sporadic renal cell carcinoma: relationship to clinicopathological parameters.                    | Kondo K et al.     | 11921283                  | Not a renal disease focus |
| 23 |                                                                                  |                                                                                                                                                        |                    |                           |                           |
| 24 | 1                                                                                | Mutations in the von Hippel-Lindau (VHL) gene refine differential diagnostic criteria in renal cell carcinoma.                                         | Barnabas N et al.  | 11967908                  | Not a renal disease focus |
| 25 |                                                                                  |                                                                                                                                                        |                    |                           |                           |
| 26 | 1                                                                                | Enhanced activity of variant phospholipase C-delta1 protein (R257H) detected in patients with coronary artery spasm.                                   | Nakano T et al.    | 11980680                  | Not a renal disease focus |
| 27 |                                                                                  |                                                                                                                                                        |                    |                           |                           |
| 28 | 1                                                                                | Inhibition of HIF is necessary for tumor suppression by the von Hippel-Lindau protein.                                                                 | Kondo K et al.     | 12086860                  | Not a renal disease focus |
| 29 |                                                                                  |                                                                                                                                                        |                    |                           |                           |
| 30 |                                                                                  |                                                                                                                                                        |                    |                           |                           |
| 31 |                                                                                  |                                                                                                                                                        |                    |                           |                           |
| 32 |                                                                                  |                                                                                                                                                        |                    |                           |                           |
| 33 |                                                                                  |                                                                                                                                                        |                    |                           |                           |
| 34 |                                                                                  |                                                                                                                                                        |                    |                           |                           |
| 35 |                                                                                  |                                                                                                                                                        |                    |                           |                           |
| 36 |                                                                                  |                                                                                                                                                        |                    |                           |                           |
| 37 |                                                                                  |                                                                                                                                                        |                    |                           |                           |
| 38 |                                                                                  |                                                                                                                                                        |                    |                           |                           |
| 39 |                                                                                  |                                                                                                                                                        |                    |                           |                           |
| 40 |                                                                                  |                                                                                                                                                        |                    |                           |                           |
| 41 |                                                                                  |                                                                                                                                                        |                    |                           |                           |
| 42 |                                                                                  |                                                                                                                                                        |                    |                           |                           |
| 43 |                                                                                  |                                                                                                                                                        |                    |                           |                           |
| 44 |                                                                                  |                                                                                                                                                        |                    |                           |                           |
| 45 |                                                                                  |                                                                                                                                                        |                    |                           |                           |
| 46 |                                                                                  |                                                                                                                                                        |                    |                           |                           |

|    |                                                                                                                                                                                                                      |                 |          |                           |
|----|----------------------------------------------------------------------------------------------------------------------------------------------------------------------------------------------------------------------|-----------------|----------|---------------------------|
| 1  | Identification of cyclin D1 and other novel targets for the von Hippel-Lindau tumor suppressor gene by expression array analysis and investigation of cyclin D1 genotype as a modifier in von Hippel-Lindau disease. | Zatyka M et al. | 12097293 | Not a renal disease focus |
| 2  |                                                                                                                                                                                                                      |                 |          |                           |
| 3  |                                                                                                                                                                                                                      |                 |          |                           |
| 4  |                                                                                                                                                                                                                      |                 |          |                           |
| 5  |                                                                                                                                                                                                                      |                 |          |                           |
| 6  |                                                                                                                                                                                                                      |                 |          |                           |
| 7  |                                                                                                                                                                                                                      |                 |          |                           |
| 8  |                                                                                                                                                                                                                      |                 |          |                           |
| 9  |                                                                                                                                                                                                                      |                 |          |                           |
| 10 |                                                                                                                                                                                                                      |                 |          |                           |
| 11 |                                                                                                                                                                                                                      |                 |          |                           |
| 12 |                                                                                                                                                                                                                      |                 |          |                           |
| 13 |                                                                                                                                                                                                                      |                 |          |                           |
| 14 |                                                                                                                                                                                                                      |                 |          |                           |
| 15 |                                                                                                                                                                                                                      |                 |          |                           |
| 16 |                                                                                                                                                                                                                      |                 |          |                           |
| 17 |                                                                                                                                                                                                                      |                 |          |                           |
| 18 |                                                                                                                                                                                                                      |                 |          |                           |
| 19 |                                                                                                                                                                                                                      |                 |          |                           |
| 20 |                                                                                                                                                                                                                      |                 |          |                           |
| 21 |                                                                                                                                                                                                                      |                 |          |                           |
| 22 |                                                                                                                                                                                                                      |                 |          |                           |
| 23 |                                                                                                                                                                                                                      |                 |          |                           |
| 24 |                                                                                                                                                                                                                      |                 |          |                           |
| 25 |                                                                                                                                                                                                                      |                 |          |                           |
| 26 |                                                                                                                                                                                                                      |                 |          |                           |
| 27 |                                                                                                                                                                                                                      |                 |          |                           |
| 28 |                                                                                                                                                                                                                      |                 |          |                           |
| 29 |                                                                                                                                                                                                                      |                 |          |                           |
| 30 |                                                                                                                                                                                                                      |                 |          |                           |
| 31 |                                                                                                                                                                                                                      |                 |          |                           |
| 32 |                                                                                                                                                                                                                      |                 |          |                           |
| 33 |                                                                                                                                                                                                                      |                 |          |                           |
| 34 |                                                                                                                                                                                                                      |                 |          |                           |
| 35 |                                                                                                                                                                                                                      |                 |          |                           |
| 36 |                                                                                                                                                                                                                      |                 |          |                           |
| 37 |                                                                                                                                                                                                                      |                 |          |                           |
| 38 |                                                                                                                                                                                                                      |                 |          |                           |
| 39 |                                                                                                                                                                                                                      |                 |          |                           |
| 40 |                                                                                                                                                                                                                      |                 |          |                           |
| 41 |                                                                                                                                                                                                                      |                 |          |                           |
| 42 |                                                                                                                                                                                                                      |                 |          |                           |
| 43 |                                                                                                                                                                                                                      |                 |          |                           |
| 44 |                                                                                                                                                                                                                      |                 |          |                           |
| 45 |                                                                                                                                                                                                                      |                 |          |                           |
| 46 |                                                                                                                                                                                                                      |                 |          |                           |

|    |                                                                                                                                                       |                 |          |                           |
|----|-------------------------------------------------------------------------------------------------------------------------------------------------------|-----------------|----------|---------------------------|
| 1  | Serum extracellular superoxide dismutase in patients with type 2 diabetes: relationship to the development of micro- and macrovascular complications. | Kimura F et al. | 12663605 | Not a renal disease focus |
| 2  |                                                                                                                                                       |                 |          |                           |
| 3  |                                                                                                                                                       |                 |          |                           |
| 4  |                                                                                                                                                       |                 |          |                           |
| 5  |                                                                                                                                                       |                 |          |                           |
| 6  |                                                                                                                                                       |                 |          |                           |
| 7  |                                                                                                                                                       |                 |          |                           |
| 8  |                                                                                                                                                       |                 |          |                           |
| 9  |                                                                                                                                                       |                 |          |                           |
| 10 |                                                                                                                                                       |                 |          |                           |
| 11 |                                                                                                                                                       |                 |          |                           |
| 12 |                                                                                                                                                       |                 |          |                           |
| 13 |                                                                                                                                                       |                 |          |                           |
| 14 |                                                                                                                                                       |                 |          |                           |
| 15 |                                                                                                                                                       |                 |          |                           |
| 16 |                                                                                                                                                       |                 |          |                           |
| 17 |                                                                                                                                                       |                 |          |                           |
| 18 |                                                                                                                                                       |                 |          |                           |
| 19 |                                                                                                                                                       |                 |          |                           |
| 20 |                                                                                                                                                       |                 |          |                           |
| 21 |                                                                                                                                                       |                 |          |                           |
| 22 |                                                                                                                                                       |                 |          |                           |
| 23 |                                                                                                                                                       |                 |          |                           |
| 24 |                                                                                                                                                       |                 |          |                           |
| 25 |                                                                                                                                                       |                 |          |                           |
| 26 |                                                                                                                                                       |                 |          |                           |
| 27 |                                                                                                                                                       |                 |          |                           |
| 28 |                                                                                                                                                       |                 |          |                           |
| 29 |                                                                                                                                                       |                 |          |                           |
| 30 |                                                                                                                                                       |                 |          |                           |
| 31 |                                                                                                                                                       |                 |          |                           |
| 32 |                                                                                                                                                       |                 |          |                           |
| 33 |                                                                                                                                                       |                 |          |                           |
| 34 |                                                                                                                                                       |                 |          |                           |
| 35 |                                                                                                                                                       |                 |          |                           |
| 36 |                                                                                                                                                       |                 |          |                           |
| 37 |                                                                                                                                                       |                 |          |                           |
| 38 |                                                                                                                                                       |                 |          |                           |
| 39 |                                                                                                                                                       |                 |          |                           |
| 40 |                                                                                                                                                       |                 |          |                           |
| 41 |                                                                                                                                                       |                 |          |                           |
| 42 |                                                                                                                                                       |                 |          |                           |
| 43 |                                                                                                                                                       |                 |          |                           |
| 44 |                                                                                                                                                       |                 |          |                           |
| 45 |                                                                                                                                                       |                 |          |                           |
| 46 |                                                                                                                                                       |                 |          |                           |



|    |   |                                                                                                                                                                                                  |                        |          |                           |
|----|---|--------------------------------------------------------------------------------------------------------------------------------------------------------------------------------------------------|------------------------|----------|---------------------------|
| 1  | 1 | Expression of the proto-oncogene Axl in renal cell carcinoma.                                                                                                                                    | Chung BI et al.        | 14565870 | Not a renal disease focus |
| 2  | 1 | Paraoxonase (Pon1) Q192R polymorphism and serum Pon1 activity in diabetic patients on maintenance hemodialysis.                                                                                  | Zhang B et al.         | 14579940 | Not a renal disease focus |
| 3  | 1 | Endothelial nitric oxide synthase gene intron 4 polymorphism in type 2 diabetes mellitus.                                                                                                        | Ksiazek P et al.       | 14580231 | Not a renal disease focus |
| 4  | 1 | Cytochrome P450 and manganese superoxide dismutase genes polymorphisms in systemic lupus erythematosus.                                                                                          | Yen JH et al.          | 14611903 | Not a renal disease focus |
| 5  | 1 | Peripheral vascular disease in Type 2 diabetic Chinese patients: associations with metabolic indices, concomitant vascular disease and genetic factors.                                          | Thomas GN et al.       | 14632699 | Not a renal disease focus |
| 6  | 1 | The rapid effects of 1,25-dihydroxyvitamin D3 require the vitamin D receptor and influence 24-hydroxylase activity: studies in human skin fibroblasts bearing vitamin D receptor mutations.      | Nguyen TM et al.       | 14665637 | Not a renal disease focus |
| 7  | 1 | Renovascular disease: effect of ACE gene deletion polymorphism and endovascular revascularization.                                                                                               | Pizzolo F et al.       | 14718831 | Not a renal disease focus |
| 8  | 1 | Genetic characterization and structural analysis of VHL Spanish families to define genotype-phenotype correlations.                                                                              | Ruiz-Llorente S et al. | 14722919 | Not a renal disease focus |
| 9  | 1 | Congenital disorder of oxygen sensing: association of the homozygous Chuvash polycythemia VHL mutation with thrombosis and vascular abnormalities but not tumors.                                | Gordeuk VR et al.      | 14726398 | Not a renal disease focus |
| 10 | 1 | Defects in translational regulation mediated by the alpha subunit of eukaryotic initiation factor 2 inhibit antiviral activity and facilitate the malignant transformation of human fibroblasts. | Perkins DJ et al.      | 14966282 | Not a renal disease focus |
| 11 | 1 | Polymorphisms of the CYP1B1 gene as risk factors for human renal cell cancer.                                                                                                                    | Sasaki M et al.        | 15041720 | Not a renal disease focus |
| 12 | 1 | Abnormal hepatocystin caused by truncating PRKCSH mutations leads to autosomal dominant polycystic liver disease.                                                                                | Drenth JP et al.       | 15057895 | Not a renal disease focus |
| 13 | 1 | KIT expression in chromophobe renal cell carcinoma: comparative immunohistochemical analysis of KIT expression in different renal cell neoplasms.                                                | Petit A et al.         | 15105658 | Not a renal disease focus |



|    |                                                                                            |                                                                                                                                                                                               |                       |                           |                           |
|----|--------------------------------------------------------------------------------------------|-----------------------------------------------------------------------------------------------------------------------------------------------------------------------------------------------|-----------------------|---------------------------|---------------------------|
| 1  | Association of the serum and glucocorticoid regulated kinase (sgk1) gene with QT interval. | Busjahn A et al.                                                                                                                                                                              | 15107590              | Not a renal disease focus |                           |
| 2  |                                                                                            |                                                                                                                                                                                               |                       |                           |                           |
| 3  |                                                                                            |                                                                                                                                                                                               |                       |                           |                           |
| 4  |                                                                                            |                                                                                                                                                                                               |                       |                           |                           |
| 5  |                                                                                            |                                                                                                                                                                                               |                       |                           |                           |
| 6  | 1                                                                                          | Three novel missense mutations of WNK4, a kinase mutated in inherited hypertension, in Japanese hypertensives: implication of clinical phenotypes.                                            | Kamide K et al.       | 15110905                  | Not a renal disease focus |
| 7  |                                                                                            |                                                                                                                                                                                               |                       |                           |                           |
| 8  |                                                                                            |                                                                                                                                                                                               |                       |                           |                           |
| 9  | 1                                                                                          | Intron 4 polymorphism of the endothelial nitric oxide synthase gene is associated with the development of lupus nephritis.                                                                    | Lee YH et al.         | 15119548                  | Not a renal disease focus |
| 10 |                                                                                            |                                                                                                                                                                                               |                       |                           |                           |
| 11 |                                                                                            |                                                                                                                                                                                               |                       |                           |                           |
| 12 | 1                                                                                          | Identification of PIK3C3 promoter variant associated with bipolar disorder and schizophrenia.                                                                                                 | Stopkova P et al.     | 15121481                  | Not a renal disease focus |
| 13 |                                                                                            |                                                                                                                                                                                               |                       |                           |                           |
| 14 | 1                                                                                          | The role of the LRPPRC (leucine-rich pentatricopeptide repeat cassette) gene in cytochrome oxidase assembly: mutation causes lowered levels of COX (cytochrome c oxidase) I and COX III mRNA. | Xu F et al.           | 15139850                  | Not a renal disease focus |
| 15 |                                                                                            |                                                                                                                                                                                               |                       |                           |                           |
| 16 | 1                                                                                          | A naturally occurring human Nedd4-2 variant displays impaired ENaC regulation in <i>Xenopus laevis</i> oocytes.                                                                               | Fouladkou F et al.    | 15140763                  | Not a renal disease focus |
| 17 |                                                                                            |                                                                                                                                                                                               |                       |                           |                           |
| 18 | 1                                                                                          | Increased amount of the angiotensin-converting enzyme (ACE) mRNA originating from the ACE allele with deletion.                                                                               | Suehiro T et al.      | 15164285                  | Not a renal disease focus |
| 19 |                                                                                            |                                                                                                                                                                                               |                       |                           |                           |
| 20 | 1                                                                                          | G protein beta3 subunit C825T polymorphism in primary IgA nephropathy.                                                                                                                        | Thibaudin L et al.    | 15200440                  | Not a renal disease focus |
| 21 |                                                                                            |                                                                                                                                                                                               |                       |                           |                           |
| 22 | 1                                                                                          | A novel missense substitution (Val1483Ile) in the fatty acid synthase gene (FAS) is associated with percentage of body fat and substrate oxidation rates in nondiabetic Pima Indians.         | Kovacs P et al.       | 15220220                  | Not a renal disease focus |
| 23 |                                                                                            |                                                                                                                                                                                               |                       |                           |                           |
| 24 | 1                                                                                          | Functional analysis of polymorphisms in the promoter regions of genes on 22q11.                                                                                                               | Hoogendoorn B et al.  | 15221787                  | Not a renal disease focus |
| 25 |                                                                                            |                                                                                                                                                                                               |                       |                           |                           |
| 26 | 1                                                                                          | Clinical implications of mutation analysis in primary hyperoxaluria type 1.                                                                                                                   | van Woerden CS et al. | 15253729                  | Not a renal disease focus |
| 27 |                                                                                            |                                                                                                                                                                                               |                       |                           |                           |
| 28 | 1                                                                                          | Paraoxonase 1 Gln/Arg polymorphism is associated with the risk of microangiopathy in Type 2 diabetes mellitus.                                                                                | Murata M et al.       | 15270786                  | Not a renal disease focus |
| 29 |                                                                                            |                                                                                                                                                                                               |                       |                           |                           |
| 30 | 1                                                                                          | Identification of 108 SNPs in TSC, WNK1, and WNK4 and their association with hypertension in a Japanese general population.                                                                   | Kokubo Y et al.       | 15309683                  | Not a renal disease focus |
| 31 |                                                                                            |                                                                                                                                                                                               |                       |                           |                           |
| 32 | 1                                                                                          | Association of a haplotype of matrix metalloproteinase (MMP)-1 and MMP-3 polymorphisms with renal cell carcinoma.                                                                             | Hirata H et al.       | 15319295                  | Not a renal disease focus |
| 33 |                                                                                            |                                                                                                                                                                                               |                       |                           |                           |
| 34 | 1                                                                                          | Genetic risk of atherosclerotic renal artery disease: the candidate gene approach in a renal angiography cohort.                                                                              | van Onna M et al.     | 15326089                  | Not a renal disease focus |
| 35 |                                                                                            |                                                                                                                                                                                               |                       |                           |                           |
| 36 |                                                                                            |                                                                                                                                                                                               |                       |                           |                           |
| 37 |                                                                                            |                                                                                                                                                                                               |                       |                           |                           |
| 38 |                                                                                            |                                                                                                                                                                                               |                       |                           |                           |
| 39 |                                                                                            |                                                                                                                                                                                               |                       |                           |                           |
| 40 |                                                                                            |                                                                                                                                                                                               |                       |                           |                           |
| 41 |                                                                                            |                                                                                                                                                                                               |                       |                           |                           |
| 42 |                                                                                            |                                                                                                                                                                                               |                       |                           |                           |
| 43 |                                                                                            |                                                                                                                                                                                               |                       |                           |                           |
| 44 |                                                                                            |                                                                                                                                                                                               |                       |                           |                           |
| 45 |                                                                                            |                                                                                                                                                                                               |                       |                           |                           |
| 46 |                                                                                            |                                                                                                                                                                                               |                       |                           |                           |

|    |   |                                                                                                                                                                          |                               |          |                           |
|----|---|--------------------------------------------------------------------------------------------------------------------------------------------------------------------------|-------------------------------|----------|---------------------------|
| 1  | 1 | Evaluation of mutation screening as a first line test for the diagnosis of the primary hyperoxalurias.                                                                   | Rumsby G et al.               | 15327387 | Not a renal disease focus |
| 2  | 1 | G-protein beta3 subunit gene C825T polymorphism in patients with vesico-ureteric reflux.                                                                                 | Zagradisnik B et al.          | 15337465 | Not a renal disease focus |
| 3  | 1 | An intronic variant of the TGFBR1 gene is associated with carcinomas of the kidney and bladder.                                                                          | Chen T et al.                 | 15382067 | Not a renal disease focus |
| 4  | 1 | Polymorphisms in the 5'-upstream region of the PKCbeta gene in Japanese patients with Type 2 diabetes.                                                                   | Ikeda Y et al.                | 15384959 | Not a renal disease focus |
| 5  | 1 | Glutathione S-transferase T1 deletion is a risk factor for developing end-stage renal disease in diabetic patients.                                                      | Yang Y et al.                 | 15492856 | Not a renal disease focus |
| 6  | 1 | CHEK2 is a multiorgan cancer susceptibility gene.                                                                                                                        | Cybulski C et al.             | 15492928 | Not a renal disease focus |
| 7  | 1 | Molecular basis of hypoxanthine-guanine phosphoribosyltransferase deficiency in Italian Lesch-Nyhan patients: identification of nine novel mutations.                    | Bertelli M et al.             | 15505382 | Not a renal disease focus |
| 8  | 1 | Distinct patterns of abnormal GNAS imprinting in familial and sporadic pseudohypoparathyroidism type IB.                                                                 | Liu J et al.                  | 15537666 | Not a renal disease focus |
| 9  | 1 | Chromophobe renal cell carcinoma: a comparative study of histological, immunohistochemical and ultrastructural features using high throughput tissue microarray.         | Abrahams NA et al.            | 15569050 | Not a renal disease focus |
| 10 | 1 | Association of a functional single-nucleotide polymorphism of PTPN22, encoding lymphoid protein phosphatase, with rheumatoid arthritis and systemic lupus erythematosus. | Orozco G et al.               | 15641066 | Not a renal disease focus |
| 11 | 1 | Altered gene expression in phenotypically normal renal cells from carriers of tumor suppressor gene mutations.                                                           | Stoyanova R et al.            | 15662135 | Not a renal disease focus |
| 12 | 1 | Thrombin activatable fibrinolysis inhibitor in Behçet's disease.                                                                                                         | Donmez A et al.               | 15668188 | Not a renal disease focus |
| 13 | 1 | Allelic variants of the human scavenger receptor class B type 1 and paraoxonase 1 on coronary heart disease: genotype-phenotype correlations.                            | Rodriquez-Esparragon F et al. | 15681296 | Not a renal disease focus |
| 14 | 1 | A novel recessive mutation in fibroblast growth factor-23 causes familial tumoral calcinosis.                                                                            | Larsson T et al.              | 15687325 | Not a renal disease focus |

|    |                                                                                                            |                                                                                                                                                                                   |                           |                           |                           |
|----|------------------------------------------------------------------------------------------------------------|-----------------------------------------------------------------------------------------------------------------------------------------------------------------------------------|---------------------------|---------------------------|---------------------------|
| 1  | DNase II polymorphisms associated with risk of renal disorder among systemic lupus erythematosus patients. | Shin HD et al.                                                                                                                                                                    | 15723160                  | Not a renal disease focus |                           |
| 2  |                                                                                                            |                                                                                                                                                                                   |                           |                           |                           |
| 3  |                                                                                                            |                                                                                                                                                                                   |                           |                           |                           |
| 4  | 1                                                                                                          | Analysis of the apolipoprotein(a) size polymorphism in patients with systemic lupus erythematosus.                                                                                | Peros E et al.            | 15754029                  | Not a renal disease focus |
| 5  |                                                                                                            |                                                                                                                                                                                   |                           |                           |                           |
| 6  | 1                                                                                                          | Relationship of eNOS gene variants to diseases that have in common an endothelial cell dysfunction.                                                                               | Heltianu C et al.         | 15784171                  | Not a renal disease focus |
| 7  |                                                                                                            |                                                                                                                                                                                   |                           |                           |                           |
| 8  | 1                                                                                                          | Variable number of tandem repeat of the 5'-flanking region of type-C human natriuretic peptide receptor gene influences blood pressure levels in obesity-associated hypertension. | Aoi N et al.              | 15785005                  | Not a renal disease focus |
| 9  |                                                                                                            |                                                                                                                                                                                   |                           |                           |                           |
| 10 | 1                                                                                                          | Renin-angiotensin system gene polymorphisms predict the progression to renal insufficiency among Asians with lupus nephritis.                                                     | Parsa A et al.            | 15789057                  | Not a renal disease focus |
| 11 |                                                                                                            |                                                                                                                                                                                   |                           |                           |                           |
| 12 | 1                                                                                                          | A novel STX16 deletion in autosomal dominant pseudohypoparathyroidism type Ib redefines the boundaries of a cis-acting imprinting control element of GNAS.                        | Linglart A et al.         | 15800843                  | Not a renal disease focus |
| 13 |                                                                                                            |                                                                                                                                                                                   |                           |                           |                           |
| 14 | 1                                                                                                          | Overexpression of human alanine:glyoxylate aminotransferase in Escherichia coli: renaturation from guanidine-HCl and affinity for pyridoxal phosphate co-factor.                  | Coulter-Mackie MB et al.  | 15802217                  | Not a renal disease focus |
| 15 |                                                                                                            |                                                                                                                                                                                   |                           |                           |                           |
| 16 | 1                                                                                                          | Association between plasma activities of semicarbazide-sensitive amine oxidase and angiotensin-converting enzyme in patients with type 1 diabetes mellitus.                       | Boomsma F et al.          | 15830186                  | Not a renal disease focus |
| 17 |                                                                                                            |                                                                                                                                                                                   |                           |                           |                           |
| 18 | 1                                                                                                          | Relationship of bradykinin B2 receptor gene polymorphism with essential hypertension and left ventricular hypertrophy.                                                            | Fu Y et al.               | 15894833                  | Not a renal disease focus |
| 19 |                                                                                                            |                                                                                                                                                                                   |                           |                           |                           |
| 20 | 1                                                                                                          | Genetic variation in the bleomycin hydrolase gene and bleomycin-induced pulmonary toxicity in germ cell cancer patients.                                                          | Nuver J et al.            | 15900213                  | Not a renal disease focus |
| 21 |                                                                                                            |                                                                                                                                                                                   |                           |                           |                           |
| 22 | 1                                                                                                          | Prevalence of von Hippel-Lindau gene mutations in sporadic renal cell carcinoma: results from The Netherlands cohort study.                                                       | van Houwelingen KP et al. | 15932632                  | Not a renal disease focus |
| 23 |                                                                                                            |                                                                                                                                                                                   |                           |                           |                           |
| 24 | 1                                                                                                          | Inducible nitric oxide synthase polymorphism is associated with susceptibility to Henoch-Schönlein purpura in northwestern Spain.                                                 | Martin J et al.           | 15940772                  | Not a renal disease focus |
| 25 |                                                                                                            |                                                                                                                                                                                   |                           |                           |                           |
| 26 | 1                                                                                                          | Association between CYP2C9 slow metabolizer genotypes and severe hypoglycaemia on medication with sulphonylurea hypoglycaemic agents.                                             | Holstein A et al.         | 15963101                  | Not a renal disease focus |
| 27 |                                                                                                            |                                                                                                                                                                                   |                           |                           |                           |
| 28 |                                                                                                            |                                                                                                                                                                                   |                           |                           |                           |
| 29 |                                                                                                            |                                                                                                                                                                                   |                           |                           |                           |
| 30 |                                                                                                            |                                                                                                                                                                                   |                           |                           |                           |
| 31 |                                                                                                            |                                                                                                                                                                                   |                           |                           |                           |
| 32 |                                                                                                            |                                                                                                                                                                                   |                           |                           |                           |
| 33 |                                                                                                            |                                                                                                                                                                                   |                           |                           |                           |
| 34 |                                                                                                            |                                                                                                                                                                                   |                           |                           |                           |
| 35 |                                                                                                            |                                                                                                                                                                                   |                           |                           |                           |
| 36 |                                                                                                            |                                                                                                                                                                                   |                           |                           |                           |
| 37 |                                                                                                            |                                                                                                                                                                                   |                           |                           |                           |
| 38 |                                                                                                            |                                                                                                                                                                                   |                           |                           |                           |
| 39 |                                                                                                            |                                                                                                                                                                                   |                           |                           |                           |
| 40 |                                                                                                            |                                                                                                                                                                                   |                           |                           |                           |
| 41 |                                                                                                            |                                                                                                                                                                                   |                           |                           |                           |
| 42 |                                                                                                            |                                                                                                                                                                                   |                           |                           |                           |
| 43 |                                                                                                            |                                                                                                                                                                                   |                           |                           |                           |
| 44 |                                                                                                            |                                                                                                                                                                                   |                           |                           |                           |
| 45 |                                                                                                            |                                                                                                                                                                                   |                           |                           |                           |
| 46 |                                                                                                            |                                                                                                                                                                                   |                           |                           |                           |

|    |                                                                                                                                                        |                                                                                                                                                                                                           |                           |                           |                           |
|----|--------------------------------------------------------------------------------------------------------------------------------------------------------|-----------------------------------------------------------------------------------------------------------------------------------------------------------------------------------------------------------|---------------------------|---------------------------|---------------------------|
| 1  | The major allele of the alanine:glyoxylate aminotransferase gene: nine novel mutations and polymorphisms associated with primary hyperoxaluria type 1. | Coulter-Mackie MB et al.                                                                                                                                                                                  | 15963748                  | Not a renal disease focus |                           |
| 2  |                                                                                                                                                        |                                                                                                                                                                                                           |                           |                           |                           |
| 3  |                                                                                                                                                        |                                                                                                                                                                                                           |                           |                           |                           |
| 4  |                                                                                                                                                        |                                                                                                                                                                                                           |                           |                           |                           |
| 5  |                                                                                                                                                        |                                                                                                                                                                                                           |                           |                           |                           |
| 6  |                                                                                                                                                        |                                                                                                                                                                                                           |                           |                           |                           |
| 7  |                                                                                                                                                        |                                                                                                                                                                                                           |                           |                           |                           |
| 8  |                                                                                                                                                        |                                                                                                                                                                                                           |                           |                           |                           |
| 9  | 1                                                                                                                                                      | Angiotensin-converting enzyme (ACE) haplotypes and cyclosporine A (CsA) response: a model of the complex relationship between ACE quantitative trait locus and pathological phenotypes.                   | Catarsi P et al.          | 16002416                  | Not a renal disease focus |
| 10 |                                                                                                                                                        |                                                                                                                                                                                                           |                           |                           |                           |
| 11 |                                                                                                                                                        |                                                                                                                                                                                                           |                           |                           |                           |
| 12 | 1                                                                                                                                                      | Increased frequency of the angiotensin-converting enzyme gene D-allele is associated with noninfectious pulmonary dysfunction following allogeneic stem cell transplant.                                  | Onizuka M et al.          | 16044138                  | Not a renal disease focus |
| 13 |                                                                                                                                                        |                                                                                                                                                                                                           |                           |                           |                           |
| 14 | 1                                                                                                                                                      | Association between polymorphisms of the renin-angiotensin system and more severe histological forms of lupus nephritis.                                                                                  | Sprovieri SR et al.       | 16047641                  | Not a renal disease focus |
| 15 |                                                                                                                                                        |                                                                                                                                                                                                           |                           |                           |                           |
| 16 | 1                                                                                                                                                      | The R620W C/T polymorphism of the gene PTPN22 is associated with SLE independently of the association of PDCD1.                                                                                           | Reddy MV et al.           | 16052172                  | Not a renal disease focus |
| 17 |                                                                                                                                                        |                                                                                                                                                                                                           |                           |                           |                           |
| 18 | 1                                                                                                                                                      | Does complement factor B have a role in the pathogenesis of atypical HUS?                                                                                                                                 | Kavanagh D et al.         | 16061287                  | Not a renal disease focus |
| 19 |                                                                                                                                                        |                                                                                                                                                                                                           |                           |                           |                           |
| 20 | 1                                                                                                                                                      | Association of NEDD4L ubiquitin ligase with essential hypertension.                                                                                                                                       | Russo CJ et al.           | 16103266                  | Not a renal disease focus |
| 21 |                                                                                                                                                        |                                                                                                                                                                                                           |                           |                           |                           |
| 22 | 1                                                                                                                                                      | CYP3A5 genotype is associated with elevated blood pressure.                                                                                                                                               | Fromm MF et al.           | 16141800                  | Not a renal disease focus |
| 23 |                                                                                                                                                        |                                                                                                                                                                                                           |                           |                           |                           |
| 24 | 1                                                                                                                                                      | Complement factor B allotypes in the susceptibility and severity of coeliac disease in patients and relatives.                                                                                            | da Rosa Utiyama SR et al. | 16164698                  | Not a renal disease focus |
| 25 |                                                                                                                                                        |                                                                                                                                                                                                           |                           |                           |                           |
| 26 | 1                                                                                                                                                      | The Prevalence of CYP2C8, 2C9, 2J2, and soluble epoxide hydrolase polymorphisms in African Americans with hypertension.                                                                                   | Dreisbach AW et al.       | 16202848                  | Not a renal disease focus |
| 27 |                                                                                                                                                        |                                                                                                                                                                                                           |                           |                           |                           |
| 28 | 1                                                                                                                                                      | Natural history of Fabry disease in females in the Fabry Outcome Survey.                                                                                                                                  | Deegan PB et al.          | 16227523                  | Not a renal disease focus |
| 29 |                                                                                                                                                        |                                                                                                                                                                                                           |                           |                           |                           |
| 30 | 1                                                                                                                                                      | ADAM33: a newly identified gene in the pathogenesis of asthma.                                                                                                                                            | Holgate ST et al.         | 16257631                  | Not a renal disease focus |
| 31 |                                                                                                                                                        |                                                                                                                                                                                                           |                           |                           |                           |
| 32 | 1                                                                                                                                                      | Alternative splicing of fibroblast growth factor receptor 3 produces a secreted isoform that inhibits fibroblast growth factor-induced proliferation and is repressed in urothelial carcinoma cell lines. | Tomlinson DC et al.       | 16288035                  | Not a renal disease focus |
| 33 |                                                                                                                                                        |                                                                                                                                                                                                           |                           |                           |                           |
| 34 | 1                                                                                                                                                      | Homozygous and compound heterozygous mutations in ZMPSTE24 cause the laminopathy restrictive dermopathy.                                                                                                  | Moulson CL et al.         | 16297189                  | Not a renal disease focus |
| 35 |                                                                                                                                                        |                                                                                                                                                                                                           |                           |                           |                           |
| 36 |                                                                                                                                                        |                                                                                                                                                                                                           |                           |                           |                           |
| 37 |                                                                                                                                                        |                                                                                                                                                                                                           |                           |                           |                           |
| 38 |                                                                                                                                                        |                                                                                                                                                                                                           |                           |                           |                           |
| 39 |                                                                                                                                                        |                                                                                                                                                                                                           |                           |                           |                           |
| 40 |                                                                                                                                                        |                                                                                                                                                                                                           |                           |                           |                           |
| 41 |                                                                                                                                                        |                                                                                                                                                                                                           |                           |                           |                           |
| 42 |                                                                                                                                                        |                                                                                                                                                                                                           |                           |                           |                           |
| 43 |                                                                                                                                                        |                                                                                                                                                                                                           |                           |                           |                           |
| 44 |                                                                                                                                                        |                                                                                                                                                                                                           |                           |                           |                           |
| 45 |                                                                                                                                                        |                                                                                                                                                                                                           |                           |                           |                           |
| 46 |                                                                                                                                                        |                                                                                                                                                                                                           |                           |                           |                           |

|    |   |                                                                                                                                                                                                                |                            |          |                           |
|----|---|----------------------------------------------------------------------------------------------------------------------------------------------------------------------------------------------------------------|----------------------------|----------|---------------------------|
| 1  | 1 | The PTPN22 620W allele is a risk factor for Wegener's granulomatosis.                                                                                                                                          | Jagiello P et al.          | 16320352 | Not a renal disease focus |
| 2  | 1 | Hypoxia-regulated expression of attenuated diphtheria toxin A fused with hypoxia-inducible factor-1alpha oxygen-dependent degradation domain preferentially induces apoptosis of hypoxic cells in solid tumor. | Koshikawa N et al.         | 16357173 | Not a renal disease focus |
| 3  | 1 | Is factor V Leiden a risk factor for thrombotic microangiopathies without severe ADAMTS 13 deficiency?                                                                                                         | Krieg S et al.             | 16411392 | Not a renal disease focus |
| 4  | 1 | Int7G24A variant of transforming growth factor-beta receptor type I is associated with invasive breast cancer.                                                                                                 | Chen T et al.              | 16428477 | Not a renal disease focus |
| 5  | 1 | Antiepidermal growth factor variant III scFv fragment: effect of radioiodination method on tumor targeting and normal tissue clearance.                                                                        | Shankar S et al.           | 16459265 | Not a renal disease focus |
| 6  | 1 | Matrix metalloproteinase-9 polymorphisms and renal cell carcinoma in a Japanese population.                                                                                                                    | Awakura Y et al.           | 16466849 | Not a renal disease focus |
| 7  | 1 | Association of CYP3A5 genotypes with blood pressure and renal function in African families.                                                                                                                    | Bochud M et al.            | 16612255 | Not a renal disease focus |
| 8  | 1 | Relationship of serum paraoxonase 1 activity and paraoxonase 1 genotype to risk of systemic lupus erythematosus.                                                                                               | Tripi LM et al.            | 16729301 | Not a renal disease focus |
| 9  | 1 | CCL18: a urinary marker of Gaucher cell burden in Gaucher patients.                                                                                                                                            | Boot RG et al.             | 16736095 | Not a renal disease focus |
| 10 | 1 | Adult leydig cell tumors of the testis caused by germline fumarate hydratase mutations.                                                                                                                        | Carvajal-Carmona LG et al. | 16757530 | Not a renal disease focus |
| 11 | 1 | Are the angiotensin-converting enzyme gene and activity risk factors for stroke?                                                                                                                               | Dikmen M et al.            | 16791358 | Not a renal disease focus |
| 12 | 1 | Increased neutrophil membrane expression and plasma level of proteinase 3 in systemic vasculitis are not a consequence of the - 564 A/G promotor polymorphism.                                                 | Abdgawad M et al.          | 16792675 | Not a renal disease focus |
| 13 | 1 | Slight association between type 1 diabetes and "ff" VDR FokI genotype in patients from the Italian Lazio Region. Lack of association with diabetes complications.                                              | Capoluongo E et al.        | 16806146 | Not a renal disease focus |

|   |                                                                                                                                                                       |                         |          |                           |
|---|-----------------------------------------------------------------------------------------------------------------------------------------------------------------------|-------------------------|----------|---------------------------|
| 1 | No association of the CYP3A5*1 allele with blood pressure and left ventricular mass and geometry: the KORA/MONICA Augsburg echocardiographic substudy.                | Lieb W et al.           | 16822233 | Not a renal disease focus |
| 1 | Autosomal-dominant pseudohypoparathyroidism type 1b is caused by different microdeletions within or upstream of the GNAS locus.                                       | Juppner H et al.        | 16831926 | Not a renal disease focus |
| 1 | VHL P25L is not a pathogenic von Hippel-Lindau mutation: a family study.                                                                                              | Pettman RK et al.       | 16884327 | Not a renal disease focus |
| 1 | ACE gene insertion/deletion polymorphism modulates capillary permeability in hypertension.                                                                            | Dell'omo G et al.       | 16889537 | Not a renal disease focus |
| 1 | Allelic variation in the CNDP1 gene and its lack of association with longevity and coronary heart disease.                                                            | Zschocke J et al.       | 16965804 | Not a renal disease focus |
| 1 | Ubiquitin ligase gp78 increases solubility and facilitates degradation of the Z variant of alpha-1-antitrypsin.                                                       | Shen Y et al.           | 16979136 | Not a renal disease focus |
| 1 | NFkappaB and its inhibitor IkappaB in relation to type 2 diabetes and its microvascular and atherosclerotic complications.                                            | Romzova M et al.        | 17002901 | Not a renal disease focus |
| 1 | Predicting the impact of population level risk reduction in cardio-vascular disease and stroke on acute hospital admission rates over a 5 year period--a pilot study. | Whitfield MD et al.     | 17084425 | Not a renal disease focus |
| 1 | Increased expression of angiotensin II type 1 receptor (AGTR1) in heart transplant recipients with recurrent rejection.                                               | Yamani MH et al.        | 17097490 | Not a renal disease focus |
| 1 | Effect of synthetic corticosteroids on vascular reactivity in the human forearm.                                                                                      | Mangos GJ et al.        | 17132537 | Not a renal disease focus |
| 1 | Association of genetic polymorphisms of ACADSB and COMT with human hypertension.                                                                                      | Kamide K et al.         | 17143180 | Not a renal disease focus |
| 1 | Role of the STK15 Phe31Ile polymorphism in renal cell carcinoma.                                                                                                      | Hammerschmied CG et al. | 17143471 | Not a renal disease focus |
| 1 | Genetic and epigenetic analysis of CHEK2 in sporadic breast, colon, and ovarian cancers.                                                                              | Williams LH et al.      | 17145815 | Not a renal disease focus |
| 1 | Blastemal expression of type I insulin-like growth factor receptor in Wilms' tumors is driven by increased copy number and correlates with relapse.                   | Natrajan R et al.       | 17145858 | Not a renal disease focus |

|    |                                                                                                                                                               |                                                                                                                                                                                                                    |                           |                           |                           |
|----|---------------------------------------------------------------------------------------------------------------------------------------------------------------|--------------------------------------------------------------------------------------------------------------------------------------------------------------------------------------------------------------------|---------------------------|---------------------------|---------------------------|
| 1  | Identification of a novel BBS gene (BBS12) highlights the major role of a vertebrate-specific branch of chaperonin-related proteins in Bardet-Biedl syndrome. | Stoetzel C et al.                                                                                                                                                                                                  | 17160889                  | Not a renal disease focus |                           |
| 2  |                                                                                                                                                               |                                                                                                                                                                                                                    |                           |                           |                           |
| 3  |                                                                                                                                                               |                                                                                                                                                                                                                    |                           |                           |                           |
| 4  |                                                                                                                                                               |                                                                                                                                                                                                                    |                           |                           |                           |
| 5  |                                                                                                                                                               |                                                                                                                                                                                                                    |                           |                           |                           |
| 6  |                                                                                                                                                               |                                                                                                                                                                                                                    |                           |                           |                           |
| 7  |                                                                                                                                                               |                                                                                                                                                                                                                    |                           |                           |                           |
| 8  |                                                                                                                                                               |                                                                                                                                                                                                                    |                           |                           |                           |
| 9  | 1                                                                                                                                                             | Association of the C825T polymorphism of the G-protein beta3 subunit gene with hypertension, obesity, hyperlipidemia, insulin resistance, diabetes, diabetic complications, and diabetic therapies among Japanese. | Hayakawa T et al.         | 17161225                  | Not a renal disease focus |
| 10 |                                                                                                                                                               |                                                                                                                                                                                                                    |                           |                           |                           |
| 11 |                                                                                                                                                               |                                                                                                                                                                                                                    |                           |                           |                           |
| 12 | 1                                                                                                                                                             | Adrenal hyperplasia and adenomas are associated with inhibition of phosphodiesterase 11A in carriers of PDE11A sequence variants that are frequent in the population.                                              | Horvath A et al.          | 17178847                  | Not a renal disease focus |
| 13 |                                                                                                                                                               |                                                                                                                                                                                                                    |                           |                           |                           |
| 14 | 1                                                                                                                                                             | Mucinous tubular and spindle cell carcinoma of kidney is probably a variant of papillary renal cell carcinoma with spindle cell features.                                                                          | Shen SS et al.            | 17240302                  | Not a renal disease focus |
| 15 |                                                                                                                                                               |                                                                                                                                                                                                                    |                           |                           |                           |
| 16 |                                                                                                                                                               |                                                                                                                                                                                                                    |                           |                           |                           |
| 17 | 1                                                                                                                                                             | EGFR sequence variations and real-time quantitative polymerase chain reaction analysis of gene dosage in brain metastases of solid tumors.                                                                         | Franco-Hernandez C et al. | 17284372                  | Not a renal disease focus |
| 18 |                                                                                                                                                               |                                                                                                                                                                                                                    |                           |                           |                           |
| 19 |                                                                                                                                                               |                                                                                                                                                                                                                    |                           |                           |                           |
| 20 | 1                                                                                                                                                             | Nosocomial outbreak of CTX-M-15-producing E. coli in Norway.                                                                                                                                                       | Naseer U et al.           | 17295678                  | Not a renal disease focus |
| 21 |                                                                                                                                                               |                                                                                                                                                                                                                    |                           |                           |                           |
| 22 | 1                                                                                                                                                             | Association of genotypes of thrombin-activatable fibrinolysis inhibitors with thrombotic microangiopathies--a pilot study.                                                                                         | Sucker C et al.           | 17327284                  | Not a renal disease focus |
| 23 |                                                                                                                                                               |                                                                                                                                                                                                                    |                           |                           |                           |
| 24 | 1                                                                                                                                                             | Functional polymorphism in human CYP4F2 decreases 20-HETE production.                                                                                                                                              | Stec DE et al.            | 17341693                  | Not a renal disease focus |
| 25 |                                                                                                                                                               |                                                                                                                                                                                                                    |                           |                           |                           |
| 26 | 1                                                                                                                                                             | Immunoexpression of lactoferrin in human sporadic renal cell carcinomas.                                                                                                                                           | Giuffre G et al.          | 17390038                  | Not a renal disease focus |
| 27 |                                                                                                                                                               |                                                                                                                                                                                                                    |                           |                           |                           |
| 28 | 1                                                                                                                                                             | Association of ATP1A1 and dear single-nucleotide polymorphism haplotypes with essential hypertension: sex-specific and haplotype-specific effects.                                                                 | Glorioso N et al.         | 17446437                  | Not a renal disease focus |
| 29 |                                                                                                                                                               |                                                                                                                                                                                                                    |                           |                           |                           |
| 30 | 1                                                                                                                                                             | Comprehensive mutation screening in 55 probands with type 1 primary hyperoxaluria shows feasibility of a gene-based diagnosis.                                                                                     | Monico CG et al.          | 17460142                  | Not a renal disease focus |
| 31 |                                                                                                                                                               |                                                                                                                                                                                                                    |                           |                           |                           |
| 32 | 1                                                                                                                                                             | Mutations in the SBDS gene in acquired aplastic anemia.                                                                                                                                                            | Calado RT et al.          | 17478638                  | Not a renal disease focus |
| 33 |                                                                                                                                                               |                                                                                                                                                                                                                    |                           |                           |                           |
| 34 | 1                                                                                                                                                             | Re-assessment of the influence of polymorphisms of phase-II metabolic enzymes on renal cell cancer risk of trichloroethylene-exposed workers.                                                                      | Wiesenhutter B et al.     | 17479278                  | Not a renal disease focus |
| 35 |                                                                                                                                                               |                                                                                                                                                                                                                    |                           |                           |                           |
| 36 |                                                                                                                                                               |                                                                                                                                                                                                                    |                           |                           |                           |
| 37 |                                                                                                                                                               |                                                                                                                                                                                                                    |                           |                           |                           |
| 38 |                                                                                                                                                               |                                                                                                                                                                                                                    |                           |                           |                           |
| 39 |                                                                                                                                                               |                                                                                                                                                                                                                    |                           |                           |                           |
| 40 |                                                                                                                                                               |                                                                                                                                                                                                                    |                           |                           |                           |
| 41 |                                                                                                                                                               |                                                                                                                                                                                                                    |                           |                           |                           |
| 42 |                                                                                                                                                               |                                                                                                                                                                                                                    |                           |                           |                           |
| 43 |                                                                                                                                                               |                                                                                                                                                                                                                    |                           |                           |                           |
| 44 |                                                                                                                                                               |                                                                                                                                                                                                                    |                           |                           |                           |
| 45 |                                                                                                                                                               |                                                                                                                                                                                                                    |                           |                           |                           |
| 46 |                                                                                                                                                               |                                                                                                                                                                                                                    |                           |                           |                           |



|    |                                                                                                                                                                                              |                      |          |                           |
|----|----------------------------------------------------------------------------------------------------------------------------------------------------------------------------------------------|----------------------|----------|---------------------------|
| 1  | Uncommon CHEK2 mis-sense variant and reduced risk of tobacco-related cancers: case control study.                                                                                            | Brennan P et al.     | 17517688 | Not a renal disease focus |
| 2  |                                                                                                                                                                                              |                      |          |                           |
| 3  |                                                                                                                                                                                              |                      |          |                           |
| 4  |                                                                                                                                                                                              |                      |          |                           |
| 5  |                                                                                                                                                                                              |                      |          |                           |
| 6  | Impact of maternal angiotensinogen M235T polymorphism and angiotensin-converting enzyme insertion/deletion polymorphism on blood pressure, protein excretion and fetal outcome in pregnancy. | Pfab T et al.        | 17563539 | Not a renal disease focus |
| 7  |                                                                                                                                                                                              |                      |          |                           |
| 8  |                                                                                                                                                                                              |                      |          |                           |
| 9  | Lack of association between endothelial nitric oxide synthase gene polymorphisms, microalbuminuria and endothelial dysfunction in hypertensive men.                                          | Dell'Omo G et al.    | 17563560 | Not a renal disease focus |
| 10 |                                                                                                                                                                                              |                      |          |                           |
| 11 |                                                                                                                                                                                              |                      |          |                           |
| 12 |                                                                                                                                                                                              |                      |          |                           |
| 13 | Circulating protein biomarkers of pharmacodynamic activity of sunitinib in patients with metastatic renal cell carcinoma: modulation of VEGF and VEGF-related proteins.                      | Deprimo SE et al.    | 17605814 | Not a renal disease focus |
| 14 |                                                                                                                                                                                              |                      |          |                           |
| 15 |                                                                                                                                                                                              |                      |          |                           |
| 16 | Glutathione S-transferase polymorphisms, cruciferous vegetable intake and cancer risk in the Central and Eastern European Kidney Cancer Study.                                               | Moore LE et al.      | 17617661 | Not a renal disease focus |
| 17 |                                                                                                                                                                                              |                      |          |                           |
| 18 |                                                                                                                                                                                              |                      |          |                           |
| 19 | Effects of angiotensin-converting enzyme gene polymorphism and serum vitamin D levels on ambulatory blood pressure measurement and left ventricular mass in Turkish hypertensive population. | Kulah E et al.       | 17625392 | Not a renal disease focus |
| 20 |                                                                                                                                                                                              |                      |          |                           |
| 21 |                                                                                                                                                                                              |                      |          |                           |
| 22 | Manganese superoxide dismutase (Mn-SOD) gene polymorphisms in urolithiasis.                                                                                                                  | Tugcu V et al.       | 17628794 | Not a renal disease focus |
| 23 |                                                                                                                                                                                              |                      |          |                           |
| 24 | Angiotensin-converting enzyme gene polymorphism in Kuwaiti patients with systemic lupus erythematosus.                                                                                       | Al-Awadhi AM et al.  | 17631741 | Not a renal disease focus |
| 25 |                                                                                                                                                                                              |                      |          |                           |
| 26 | MDM2 SNP309 polymorphism as risk factor for susceptibility and poor prognosis in renal cell carcinoma.                                                                                       | Hirata H et al.      | 17634539 | Not a renal disease focus |
| 27 |                                                                                                                                                                                              |                      |          |                           |
| 28 | Protein expression and mutational analysis of epidermal growth factor receptor in renal angiomyolipomas.                                                                                     | Lim SD et al.        | 17685929 | Not a renal disease focus |
| 29 |                                                                                                                                                                                              |                      |          |                           |
| 30 |                                                                                                                                                                                              |                      |          |                           |
| 31 | Germline VHL gene mutations in three Serbian families with von Hippel-Lindau disease.                                                                                                        | Stanojevic BR et al. | 17688370 | Not a renal disease focus |
| 32 |                                                                                                                                                                                              |                      |          |                           |
| 33 | The E3 ligase HACE1 is a critical chromosome 6q21 tumor suppressor involved in multiple cancers.                                                                                             | Zhang L et al.       | 17694067 | Not a renal disease focus |
| 34 |                                                                                                                                                                                              |                      |          |                           |
| 35 | Genetic variation in the paraoxonase-3 (PON3) gene is associated with serum PON1 activity.                                                                                                   | Sanghera DK et al.   | 17900266 | Not a renal disease focus |
| 36 |                                                                                                                                                                                              |                      |          |                           |
| 37 |                                                                                                                                                                                              |                      |          |                           |
| 38 | Genetic polymorphisms in OGG1 and their association with angiomyolipoma, a benign kidney tumor in patients with tuberosclerosis.                                                             | Habib SL et al.      | 17932460 | Not a renal disease focus |
| 39 |                                                                                                                                                                                              |                      |          |                           |
| 40 |                                                                                                                                                                                              |                      |          |                           |
| 41 |                                                                                                                                                                                              |                      |          |                           |
| 42 |                                                                                                                                                                                              |                      |          |                           |
| 43 |                                                                                                                                                                                              |                      |          |                           |
| 44 |                                                                                                                                                                                              |                      |          |                           |
| 45 |                                                                                                                                                                                              |                      |          |                           |
| 46 |                                                                                                                                                                                              |                      |          |                           |



|   |                                                                                                                                                                                                        |                       |          |                           |
|---|--------------------------------------------------------------------------------------------------------------------------------------------------------------------------------------------------------|-----------------------|----------|---------------------------|
| 1 | Human G(salpa) mutant causes pseudohypoparathyroidism type Ia/neonatal diarrhea, a potential cell-specific role of the palmitoylation cycle.                                                           | Makita N et al.       | 17962410 | Not a renal disease focus |
| 1 | Association of the nitric oxide synthase (eNOS) gene polymorphism with increased risk for both lupus glomerulonephritis and rheumatoid arthritis in a single genetically homogeneous population.       | Vazgiourakis V et al. | 17971359 | Not a renal disease focus |
| 1 | Lack of association between matrix metalloproteinase-1 (MMP-1) promoter polymorphism and risk of renal cell carcinoma.                                                                                 | Piccoli MF et al.     | 17980059 | Not a renal disease focus |
| 1 | Differential regulation of serum- and glucocorticoid-inducible kinase 1 (SGK1) splice variants based on alternative initiation of transcription.                                                       | Simon P et al.        | 17982254 | Not a renal disease focus |
| 1 | Polymorphisms in genes related to activation or detoxification of carcinogens might interact with smoking to increase renal cancer risk: results from The Netherlands Cohort Study on diet and cancer. | Smits KM et al.       | 17982751 | Not a renal disease focus |
| 1 | Dominant-negative HIF-3 alpha 4 suppresses VHL-null renal cell carcinoma progression.                                                                                                                  | Maynard MA et al.     | 17998805 | Not a renal disease focus |
| 1 | The extracolonic cancer spectrum in females with the common 'South African' hMLH1 c.C1528T mutation.                                                                                                   | Blokhuis MM et al.    | 18049911 | Not a renal disease focus |
| 1 | Position of nonmuscle myosin heavy chain IIA (NMMHC-IIA) mutations predicts the natural history of MYH9-related disease.                                                                               | Pecci A et al.        | 18059020 | Not a renal disease focus |
| 1 | Lack of association of a functional single nucleotide polymorphism of PTPN22, encoding lymphoid protein phosphatase, with susceptibility to Henoch-Schönlein purpura.                                  | Orozco G et al.       | 18078626 | Not a renal disease focus |
| 1 | Progesterone receptor reactivity in renal oncocytoma and chromophobe renal cell carcinoma.                                                                                                             | Mai KT et al.         | 18081814 | Not a renal disease focus |
| 1 | Constant allelic alteration on chromosome 16p (TSC2 gene) in perivascular epithelioid cell tumour (PEComa): genetic evidence for the relationship of PEComa with angiomyolipoma.                       | Pan CC et al.         | 18085521 | Not a renal disease focus |
| 1 | Association of angiotensin-converting enzyme gene insertion/deletion polymorphism with metabolic syndrome in Iranians with type 2 diabetes mellitus.                                                   | Nikzamir A et al.     | 18154415 | Not a renal disease focus |
| 1 | Association of CDKAL1, IGF2BP2, CDKN2A/B, HHEX, SLC30A8, and KCNJ11 with susceptibility to type 2 diabetes in a Japanese population.                                                                   | Omori S et al.        | 18162508 | Not a renal disease focus |

|    |                                                                                                                                                                  |                                                                                                                                                               |                      |                           |                           |
|----|------------------------------------------------------------------------------------------------------------------------------------------------------------------|---------------------------------------------------------------------------------------------------------------------------------------------------------------|----------------------|---------------------------|---------------------------|
| 1  | Renal oncocytoma with and without intravascular extension into the branches of renal vein have the same morphological, immunohistochemical and genetic features. | Hes O et al.                                                                                                                                                  | 18196270             | Not a renal disease focus |                           |
| 2  |                                                                                                                                                                  |                                                                                                                                                               |                      |                           |                           |
| 3  |                                                                                                                                                                  |                                                                                                                                                               |                      |                           |                           |
| 4  |                                                                                                                                                                  |                                                                                                                                                               |                      |                           |                           |
| 5  |                                                                                                                                                                  |                                                                                                                                                               |                      |                           |                           |
| 6  |                                                                                                                                                                  |                                                                                                                                                               |                      |                           |                           |
| 7  |                                                                                                                                                                  |                                                                                                                                                               |                      |                           |                           |
| 8  | 1                                                                                                                                                                | Association of SGK1 gene polymorphisms with type 2 diabetes.                                                                                                  | Schwab M et al.      | 18209482                  | Not a renal disease focus |
| 9  |                                                                                                                                                                  |                                                                                                                                                               |                      |                           |                           |
| 10 | 1                                                                                                                                                                | Association of a functional cytochrome P450 4F2 haplotype with urinary 20-HETE and hypertension.                                                              | Liu H et al.         | 18235092                  | Not a renal disease focus |
| 11 |                                                                                                                                                                  |                                                                                                                                                               |                      |                           |                           |
| 12 | 1                                                                                                                                                                | Haplotypes of the HRES-1 endogenous retrovirus are associated with development and disease manifestations of systemic lupus erythematosus.                    | Pullmann R Jr et al. | 18240231                  | Not a renal disease focus |
| 13 |                                                                                                                                                                  |                                                                                                                                                               |                      |                           |                           |
| 14 |                                                                                                                                                                  |                                                                                                                                                               |                      |                           |                           |
| 15 | 1                                                                                                                                                                | Genetic and epigenetic alterations in the von hippel-lindau gene: the influence on renal cancer prognosis.                                                    | Smits KM et al.      | 18245539                  | Not a renal disease focus |
| 16 |                                                                                                                                                                  |                                                                                                                                                               |                      |                           |                           |
| 17 | 1                                                                                                                                                                | AMP-activated protein kinase inhibits transforming growth factor-beta-induced Smad3-dependent transcription and myofibroblast transdifferentiation.           | Mishra R et al.      | 18250161                  | Not a renal disease focus |
| 18 |                                                                                                                                                                  |                                                                                                                                                               |                      |                           |                           |
| 19 |                                                                                                                                                                  |                                                                                                                                                               |                      |                           |                           |
| 20 | 1                                                                                                                                                                | Oncocytic papillary renal cell carcinoma with solid architecture: mimic of renal oncocytoma.                                                                  | Mai KT et al.        | 18251779                  | Not a renal disease focus |
| 21 |                                                                                                                                                                  |                                                                                                                                                               |                      |                           |                           |
| 22 | 1                                                                                                                                                                | Structure of the N-terminal region of complement factor H and conformational implications of disease-linked sequence variations.                              | Hocking HG et al.    | 18252712                  | Not a renal disease focus |
| 23 |                                                                                                                                                                  |                                                                                                                                                               |                      |                           |                           |
| 24 | 1                                                                                                                                                                | The role of type 1 and type 2 5'-deiodinase in the pathophysiology of the 3,5,3'-triiodothyronine toxicosis of McCune-Albright syndrome.                      | Celi FS et al.       | 18349068                  | Not a renal disease focus |
| 25 |                                                                                                                                                                  |                                                                                                                                                               |                      |                           |                           |
| 26 | 1                                                                                                                                                                | N-acetyltransferase 8, a positional candidate for blood pressure and renal regulation: resequencing, association and in silico study.                         | Juhanson P et al.    | 18402670                  | Not a renal disease focus |
| 27 |                                                                                                                                                                  |                                                                                                                                                               |                      |                           |                           |
| 28 | 1                                                                                                                                                                | Association analysis in african americans of European-derived type 2 diabetes single nucleotide polymorphisms from whole-genome association studies.          | Lewis JP et al.      | 18443202                  | Not a renal disease focus |
| 29 |                                                                                                                                                                  |                                                                                                                                                               |                      |                           |                           |
| 30 | 1                                                                                                                                                                | PPP2R2B CAG repeat length in the Han Chinese in Taiwan: Association analyses in neurological and psychiatric disorders and potential functional implications. | Chen CM et al.       | 18484086                  | Not a renal disease focus |
| 31 |                                                                                                                                                                  |                                                                                                                                                               |                      |                           |                           |
| 32 | 1                                                                                                                                                                | Glutathione S-transferase variants and hypertension.                                                                                                          | Delles C et al.      | 18551009                  | Not a renal disease focus |
| 33 |                                                                                                                                                                  |                                                                                                                                                               |                      |                           |                           |
| 34 | 1                                                                                                                                                                | Allelic loss analysis of tumor suppressor genes regardless of heterozygosity: von Hippel-Lindau gene loss in renal cell carcinoma.                            | Mochida J et al.     | 18554638                  | Not a renal disease focus |
| 35 |                                                                                                                                                                  |                                                                                                                                                               |                      |                           |                           |
| 36 |                                                                                                                                                                  |                                                                                                                                                               |                      |                           |                           |
| 37 |                                                                                                                                                                  |                                                                                                                                                               |                      |                           |                           |
| 38 |                                                                                                                                                                  |                                                                                                                                                               |                      |                           |                           |
| 39 |                                                                                                                                                                  |                                                                                                                                                               |                      |                           |                           |
| 40 |                                                                                                                                                                  |                                                                                                                                                               |                      |                           |                           |
| 41 |                                                                                                                                                                  |                                                                                                                                                               |                      |                           |                           |
| 42 |                                                                                                                                                                  |                                                                                                                                                               |                      |                           |                           |
| 43 |                                                                                                                                                                  |                                                                                                                                                               |                      |                           |                           |
| 44 |                                                                                                                                                                  |                                                                                                                                                               |                      |                           |                           |
| 45 |                                                                                                                                                                  |                                                                                                                                                               |                      |                           |                           |
| 46 |                                                                                                                                                                  |                                                                                                                                                               |                      |                           |                           |

|    |                                                                                                                    |                                                                                                                                                                                                                               |                    |                           |                           |
|----|--------------------------------------------------------------------------------------------------------------------|-------------------------------------------------------------------------------------------------------------------------------------------------------------------------------------------------------------------------------|--------------------|---------------------------|---------------------------|
| 1  | Renal cell carcinoma, occupational pesticide exposure and modification by glutathione S-transferase polymorphisms. | Karami S et al.                                                                                                                                                                                                               | 18566013           | Not a renal disease focus |                           |
| 2  |                                                                                                                    |                                                                                                                                                                                                                               |                    |                           |                           |
| 3  |                                                                                                                    |                                                                                                                                                                                                                               |                    |                           |                           |
| 4  | 1                                                                                                                  | No association between single nucleotide polymorphisms and the development of nephrotoxicity after orthotopic heart transplantation.                                                                                          | Klauke B et al.    | 18582803                  | Not a renal disease focus |
| 5  |                                                                                                                    |                                                                                                                                                                                                                               |                    |                           |                           |
| 6  | 1                                                                                                                  | Association of GSTM3 intron 6 variant with cigarette smoking, tobacco chewing and alcohol as modifier factors for prostate cancer risk.                                                                                       | Kesarwani P et al. | 18668224                  | Not a renal disease focus |
| 7  |                                                                                                                    |                                                                                                                                                                                                                               |                    |                           |                           |
| 8  | 1                                                                                                                  | Association of renin-angiotensin and endothelial nitric oxide synthase gene polymorphisms with blood pressure progression and incident hypertension: prospective cohort study.                                                | Conen D et al.     | 18698212                  | Not a renal disease focus |
| 9  |                                                                                                                    |                                                                                                                                                                                                                               |                    |                           |                           |
| 10 | 1                                                                                                                  | Association of angiotensin-converting enzyme gene dimorphisms with severity of lupus disease.                                                                                                                                 | Rabbani MA et al.  | 18711292                  | Not a renal disease focus |
| 11 |                                                                                                                    |                                                                                                                                                                                                                               |                    |                           |                           |
| 12 | 1                                                                                                                  | Development of human cell models for assessing the carcinogenic potential of chemicals.                                                                                                                                       | Pang Y et al.      | 18778725                  | Not a renal disease focus |
| 13 |                                                                                                                    |                                                                                                                                                                                                                               |                    |                           |                           |
| 14 | 1                                                                                                                  | SIRT1 genetic variants associate with the metabolic response of Caucasians to a controlled lifestyle intervention--the TULIP Study.                                                                                           | Weyrich P et al.   | 19014491                  | Not a renal disease focus |
| 15 |                                                                                                                    |                                                                                                                                                                                                                               |                    |                           |                           |
| 16 | 1                                                                                                                  | Influence of XPD and APE1 DNA repair gene polymorphism on bladder cancer susceptibility in north India.                                                                                                                       | Gangwar R et al.   | 19041121                  | Not a renal disease focus |
| 17 |                                                                                                                    |                                                                                                                                                                                                                               |                    |                           |                           |
| 18 | 1                                                                                                                  | Genetic variants in hypertensive patients with coronary artery disease and coexisting atheromatous renal artery stenosis.                                                                                                     | Szperl M et al.    | 19043368                  | Not a renal disease focus |
| 19 |                                                                                                                    |                                                                                                                                                                                                                               |                    |                           |                           |
| 20 | 1                                                                                                                  | When should genetic testing be obtained in a patient with pheochromocytoma or paraganglioma?                                                                                                                                  | Erlic Z et al.     | 19067729                  | Not a renal disease focus |
| 21 |                                                                                                                    |                                                                                                                                                                                                                               |                    |                           |                           |
| 22 | 1                                                                                                                  | Identification of novel mutations and sequence variation in the Zellweger syndrome spectrum of peroxisome biogenesis disorders.                                                                                               | Yik WY et al.      | 19105186                  | Not a renal disease focus |
| 23 |                                                                                                                    |                                                                                                                                                                                                                               |                    |                           |                           |
| 24 | 1                                                                                                                  | High aldosterone-to-renin variants of CYP11B2 and pregnancy outcome.                                                                                                                                                          | Escher G et al.    | 19151144                  | Not a renal disease focus |
| 25 |                                                                                                                    |                                                                                                                                                                                                                               |                    |                           |                           |
| 26 | 1                                                                                                                  | The Leu262Val polymorphism of presenilin associated rhomboid like protein (PARL) is associated with earlier onset of type 2 diabetes and increased urinary microalbumin creatinine ratio in an Irish case-control population. | Hatunic M et al.   | 19185381                  | Not a renal disease focus |
| 27 |                                                                                                                    |                                                                                                                                                                                                                               |                    |                           |                           |
| 28 | 1                                                                                                                  | A pilot study of genetic polymorphisms and hemodialysis vascular access thrombosis.                                                                                                                                           | Brophy DF et al.   | 19210273                  | Not a renal disease focus |
| 29 |                                                                                                                    |                                                                                                                                                                                                                               |                    |                           |                           |
| 30 |                                                                                                                    |                                                                                                                                                                                                                               |                    |                           |                           |
| 31 |                                                                                                                    |                                                                                                                                                                                                                               |                    |                           |                           |
| 32 |                                                                                                                    |                                                                                                                                                                                                                               |                    |                           |                           |
| 33 |                                                                                                                    |                                                                                                                                                                                                                               |                    |                           |                           |
| 34 |                                                                                                                    |                                                                                                                                                                                                                               |                    |                           |                           |
| 35 |                                                                                                                    |                                                                                                                                                                                                                               |                    |                           |                           |
| 36 |                                                                                                                    |                                                                                                                                                                                                                               |                    |                           |                           |
| 37 |                                                                                                                    |                                                                                                                                                                                                                               |                    |                           |                           |
| 38 |                                                                                                                    |                                                                                                                                                                                                                               |                    |                           |                           |
| 39 |                                                                                                                    |                                                                                                                                                                                                                               |                    |                           |                           |
| 40 |                                                                                                                    |                                                                                                                                                                                                                               |                    |                           |                           |
| 41 |                                                                                                                    |                                                                                                                                                                                                                               |                    |                           |                           |
| 42 |                                                                                                                    |                                                                                                                                                                                                                               |                    |                           |                           |
| 43 |                                                                                                                    |                                                                                                                                                                                                                               |                    |                           |                           |
| 44 |                                                                                                                    |                                                                                                                                                                                                                               |                    |                           |                           |
| 45 |                                                                                                                    |                                                                                                                                                                                                                               |                    |                           |                           |
| 46 |                                                                                                                    |                                                                                                                                                                                                                               |                    |                           |                           |

|    |                                                                                                                                                                                                              |                       |          |                           |
|----|--------------------------------------------------------------------------------------------------------------------------------------------------------------------------------------------------------------|-----------------------|----------|---------------------------|
| 1  | CYP1B1 mutations in Spanish patients with primary congenital glaucoma: phenotypic and functional variability.                                                                                                | Campos-Mollo E et al. | 19234632 | Not a renal disease focus |
| 2  |                                                                                                                                                                                                              |                       |          |                           |
| 3  |                                                                                                                                                                                                              |                       |          |                           |
| 4  |                                                                                                                                                                                                              |                       |          |                           |
| 5  |                                                                                                                                                                                                              |                       |          |                           |
| 6  | Impact of nucleotide excision repair ERCC2 and base excision repair APEX1 genes polymorphism and its association with recurrence after adjuvant BCG immunotherapy in bladder cancer patients of North India. | Gangawar R et al.     | 19242824 | Not a renal disease focus |
| 7  |                                                                                                                                                                                                              |                       |          |                           |
| 8  |                                                                                                                                                                                                              |                       |          |                           |
| 9  | Functional basis of protection against age-related macular degeneration conferred by a common polymorphism in complement factor B.                                                                           | Montes T et al.       | 19255449 | Not a renal disease focus |
| 10 |                                                                                                                                                                                                              |                       |          |                           |
| 11 |                                                                                                                                                                                                              |                       |          |                           |
| 12 | Insight into mechanism of oxidative DNA damage in angiomyolipomas from TSC patients.                                                                                                                         | Habib SL              | 19265534 | Not a renal disease focus |
| 13 |                                                                                                                                                                                                              |                       |          |                           |
| 14 | Alu-Alu recombination underlies the vast majority of large VHL germline deletions: Molecular characterization and genotype-phenotype correlations in VHL patients.                                           | Franke G et al.       | 19280651 | Not a renal disease focus |
| 15 |                                                                                                                                                                                                              |                       |          |                           |
| 16 |                                                                                                                                                                                                              |                       |          |                           |
| 17 |                                                                                                                                                                                                              |                       |          |                           |
| 18 | Loss of function of Sco1 and its interaction with cytochrome c oxidase.                                                                                                                                      | Stiburek L et al.     | 19295170 | Not a renal disease focus |
| 19 |                                                                                                                                                                                                              |                       |          |                           |
| 20 | Expression of hepatocyte growth factor and its receptor met in Wilms' tumors and nephrogenic rests reflects their roles in kidney development.                                                               | Vuononvirta R et al.  | 19318497 | Not a renal disease focus |
| 21 |                                                                                                                                                                                                              |                       |          |                           |
| 22 | A human polymorphism affects NEDD4L subcellular targeting by leading to two isoforms that contain or lack a C2 domain.                                                                                       | Garrone NF et al.     | 19364400 | Not a renal disease focus |
| 23 |                                                                                                                                                                                                              |                       |          |                           |
| 24 | The action and mode of binding of thiazolidinedione ligands at free fatty acid receptor 1.                                                                                                                   | Smith NJ et al.       | 19398560 | Not a renal disease focus |
| 25 |                                                                                                                                                                                                              |                       |          |                           |
| 26 |                                                                                                                                                                                                              |                       |          |                           |
| 27 | Tropical calcific pancreatitis and its association with CTSC and SPINK1 (p.N34S) variants.                                                                                                                   | Derikx MH et al.      | 19404200 | Not a renal disease focus |
| 28 |                                                                                                                                                                                                              |                       |          |                           |
| 29 | GSTM1, GSTM3 and GSTT1 gene variants and risk of benign prostate hyperplasia in North India.                                                                                                                 | Mittal RD et al.      | 19407363 | Not a renal disease focus |
| 30 |                                                                                                                                                                                                              |                       |          |                           |
| 31 | Structural bioinformatics mutation analysis reveals genotype-phenotype correlations in von Hippel-Lindau disease and suggests molecular mechanisms of tumorigenesis.                                         | Forman JR et al.      | 19408298 | Not a renal disease focus |
| 32 |                                                                                                                                                                                                              |                       |          |                           |
| 33 |                                                                                                                                                                                                              |                       |          |                           |
| 34 | Caspase 9 and caspase 8 gene polymorphisms and susceptibility to bladder cancer in north Indian population.                                                                                                  | Gangwar R et al.      | 19412632 | Not a renal disease focus |
| 35 |                                                                                                                                                                                                              |                       |          |                           |
| 36 | Is polymorphism within eNOS gene associated with the late onset of myocardial infarction? A pilot study.                                                                                                     | Gluba A et al.        | 19505886 | Not a renal disease focus |
| 37 |                                                                                                                                                                                                              |                       |          |                           |
| 38 |                                                                                                                                                                                                              |                       |          |                           |
| 39 |                                                                                                                                                                                                              |                       |          |                           |
| 40 |                                                                                                                                                                                                              |                       |          |                           |
| 41 |                                                                                                                                                                                                              |                       |          |                           |
| 42 |                                                                                                                                                                                                              |                       |          |                           |
| 43 |                                                                                                                                                                                                              |                       |          |                           |
| 44 |                                                                                                                                                                                                              |                       |          |                           |
| 45 |                                                                                                                                                                                                              |                       |          |                           |
| 46 |                                                                                                                                                                                                              |                       |          |                           |

|    |                                                                                                                       |                                                                                                                                                                               |                             |                           |                           |
|----|-----------------------------------------------------------------------------------------------------------------------|-------------------------------------------------------------------------------------------------------------------------------------------------------------------------------|-----------------------------|---------------------------|---------------------------|
| 1  | Functional phosphodiesterase 11A mutations may modify the risk of familial and bilateral testicular germ cell tumors. | Horvath A et al.                                                                                                                                                              | 19549888                    | Not a renal disease focus |                           |
| 2  |                                                                                                                       |                                                                                                                                                                               |                             |                           |                           |
| 3  |                                                                                                                       |                                                                                                                                                                               |                             |                           |                           |
| 4  | 1                                                                                                                     | Analysis of germline variants in CDH1, IGFBP3, MMP1, MMP3, STK15 and VEGF in familial and sporadic renal cell carcinoma.                                                      | Ricketts C et al.           | 19551141                  | Not a renal disease focus |
| 5  |                                                                                                                       |                                                                                                                                                                               |                             |                           |                           |
| 6  | 1                                                                                                                     | The calcineurin homologous protein-1 increases Na(+)/H(+)-exchanger 3 trafficking via ezrin phosphorylation.                                                                  | Di Sole F et al.            | 19556366                  | Not a renal disease focus |
| 7  |                                                                                                                       |                                                                                                                                                                               |                             |                           |                           |
| 8  | 1                                                                                                                     | A functional variant of NEDD4L is associated with hypertension, antihypertensive response, and orthostatic hypotension.                                                       | Luo F et al.                | 19635985                  | Not a renal disease focus |
| 9  |                                                                                                                       |                                                                                                                                                                               |                             |                           |                           |
| 10 | 1                                                                                                                     | A significantly joint effect between arsenic and occupational exposures and risk genotypes/diplotypes of CYP2E1, GSTO1 and GSTO2 on risk of urothelial carcinoma.             | Wang YH et al.              | 19686770                  | Not a renal disease focus |
| 11 |                                                                                                                       |                                                                                                                                                                               |                             |                           |                           |
| 12 | 1                                                                                                                     | Genetic polymorphisms in genes encoding antioxidant enzymes are associated with diabetic retinopathy in type 1 diabetes.                                                      | Hovnik T et al.             | 19752172                  | Not a renal disease focus |
| 13 |                                                                                                                       |                                                                                                                                                                               |                             |                           |                           |
| 14 | 1                                                                                                                     | Loss of heterozygosity at 2q37 in sporadic Wilms' tumor: putative role for miR-562.                                                                                           | Drake KM et al.             | 19789318                  | Not a renal disease focus |
| 15 |                                                                                                                       |                                                                                                                                                                               |                             |                           |                           |
| 16 | 1                                                                                                                     | Apolipoprotein E/C1 locus variants modify renal cell carcinoma risk.                                                                                                          | Moore LE et al.             | 19808960                  | Not a renal disease focus |
| 17 |                                                                                                                       |                                                                                                                                                                               |                             |                           |                           |
| 18 | 1                                                                                                                     | Do DNA repair genes OGG1, XRCC3 and XRCC7 have an impact on susceptibility to bladder cancer in the North Indian population?                                                  | Gangwar R et al.            | 19815090                  | Not a renal disease focus |
| 19 |                                                                                                                       |                                                                                                                                                                               |                             |                           |                           |
| 20 | 1                                                                                                                     | Angiotensin-converting enzyme and angiotensin II receptor subtype 2 genotypes in type 1 diabetes and severe hypoglycaemia requiring emergency treatment: a case cohort study. | Pedersen-Bjergaard U et al. | 19820429                  | Not a renal disease focus |
| 21 |                                                                                                                       |                                                                                                                                                                               |                             |                           |                           |
| 22 | 1                                                                                                                     | Clinical predictors and algorithm for the genetic diagnosis of pheochromocytoma patients.                                                                                     | Erlic Z et al.              | 19825962                  | Not a renal disease focus |
| 23 |                                                                                                                       |                                                                                                                                                                               |                             |                           |                           |
| 24 | 1                                                                                                                     | A polymorphism within the fructosamine-3-kinase gene is associated with HbA1c Levels and the onset of type 2 diabetes mellitus.                                               | Mohas M et al.              | 19834870                  | Not a renal disease focus |
| 25 |                                                                                                                       |                                                                                                                                                                               |                             |                           |                           |
| 26 | 1                                                                                                                     | A study on the association between angiotensin-I converting enzyme I/D dimorphism and type-2 diabetes mellitus.                                                               | Chmaisse HN et al.          | 19861867                  | Not a renal disease focus |
| 27 |                                                                                                                       |                                                                                                                                                                               |                             |                           |                           |
| 28 | 1                                                                                                                     | The Int7G24A variant of transforming growth factor-beta receptor type I is a risk factor for colorectal cancer in the male Spanish population: a case-control study.          | Castillejo A et al.         | 19930569                  | Not a renal disease focus |
| 29 |                                                                                                                       |                                                                                                                                                                               |                             |                           |                           |
| 30 |                                                                                                                       |                                                                                                                                                                               |                             |                           |                           |
| 31 |                                                                                                                       |                                                                                                                                                                               |                             |                           |                           |
| 32 |                                                                                                                       |                                                                                                                                                                               |                             |                           |                           |
| 33 |                                                                                                                       |                                                                                                                                                                               |                             |                           |                           |
| 34 |                                                                                                                       |                                                                                                                                                                               |                             |                           |                           |
| 35 |                                                                                                                       |                                                                                                                                                                               |                             |                           |                           |
| 36 |                                                                                                                       |                                                                                                                                                                               |                             |                           |                           |
| 37 |                                                                                                                       |                                                                                                                                                                               |                             |                           |                           |
| 38 |                                                                                                                       |                                                                                                                                                                               |                             |                           |                           |
| 39 |                                                                                                                       |                                                                                                                                                                               |                             |                           |                           |
| 40 |                                                                                                                       |                                                                                                                                                                               |                             |                           |                           |
| 41 |                                                                                                                       |                                                                                                                                                                               |                             |                           |                           |
| 42 |                                                                                                                       |                                                                                                                                                                               |                             |                           |                           |
| 43 |                                                                                                                       |                                                                                                                                                                               |                             |                           |                           |
| 44 |                                                                                                                       |                                                                                                                                                                               |                             |                           |                           |
| 45 |                                                                                                                       |                                                                                                                                                                               |                             |                           |                           |
| 46 |                                                                                                                       |                                                                                                                                                                               |                             |                           |                           |

|    |                                                                                                                                                     |                                                                                                                                                                                          |                      |                           |                           |
|----|-----------------------------------------------------------------------------------------------------------------------------------------------------|------------------------------------------------------------------------------------------------------------------------------------------------------------------------------------------|----------------------|---------------------------|---------------------------|
| 1  | The role of polymorphisms within paraoxonases (192 Gln/Arg in PON1 and 311Ser/Cys in PON2) in the modulation of cardiovascular risk: a pilot study. | Gluba A et al.                                                                                                                                                                           | 19939821             | Not a renal disease focus |                           |
| 2  |                                                                                                                                                     |                                                                                                                                                                                          |                      |                           |                           |
| 3  |                                                                                                                                                     |                                                                                                                                                                                          |                      |                           |                           |
| 4  |                                                                                                                                                     |                                                                                                                                                                                          |                      |                           |                           |
| 5  |                                                                                                                                                     |                                                                                                                                                                                          |                      |                           |                           |
| 6  |                                                                                                                                                     |                                                                                                                                                                                          |                      |                           |                           |
| 7  |                                                                                                                                                     |                                                                                                                                                                                          |                      |                           |                           |
| 8  |                                                                                                                                                     |                                                                                                                                                                                          |                      |                           |                           |
| 9  | 1                                                                                                                                                   | Endothelial nitric oxide synthase and nicotinamide adenosine dinucleotide phosphate oxidase p22phox gene (C242T) polymorphisms and systemic lupus erythematosus in a Chinese Population. | Tang FY et al.       | 19965945                  | Not a renal disease focus |
| 10 |                                                                                                                                                     |                                                                                                                                                                                          |                      |                           |                           |
| 11 | 1                                                                                                                                                   | A novel human heparanase splice variant, T5, endowed with protumorigenic characteristics.                                                                                                | Barash U et al.      | 20007507                  | Not a renal disease focus |
| 12 |                                                                                                                                                     |                                                                                                                                                                                          |                      |                           |                           |
| 13 | 1                                                                                                                                                   | Influence of CYP3A5 and ABCB1 gene polymorphisms on calcineurin inhibitor-related neurotoxicity after hematopoietic stem cell transplantation.                                           | Yanagimachi M et al. | 20030680                  | Not a renal disease focus |
| 14 |                                                                                                                                                     |                                                                                                                                                                                          |                      |                           |                           |
| 15 | 1                                                                                                                                                   | Development of a multiplex ligation-dependent probe amplification (MLPA) assay for quantification of the OCRL1 gene.                                                                     | Coutton C et al.     | 20043897                  | Not a renal disease focus |
| 16 |                                                                                                                                                     |                                                                                                                                                                                          |                      |                           |                           |
| 17 | 1                                                                                                                                                   | DNA repair gene X-ray repair cross-complementing group 1 and xeroderma pigmentosum group D polymorphisms and risk of prostate cancer: a study from North India.                          | Mandal RK et al.     | 20070155                  | Not a renal disease focus |
| 18 |                                                                                                                                                     |                                                                                                                                                                                          |                      |                           |                           |
| 19 | 1                                                                                                                                                   | Renal cell carcinoma Fuhrman grade and histological subtype correlate with complete polymorphic deletion of glutathione S-transferase M1 gene.                                           | De Martino M et al.  | 20083259                  | Not a renal disease focus |
| 20 |                                                                                                                                                     |                                                                                                                                                                                          |                      |                           |                           |
| 21 | 1                                                                                                                                                   | Genetic variations in the sodium balance-regulating genes ENaC, NEDD4L, NDFIP2 and USP2 influence blood pressure and hypertension.                                                       | Jin HS et al.        | 20090362                  | Not a renal disease focus |
| 22 |                                                                                                                                                     |                                                                                                                                                                                          |                      |                           |                           |
| 23 | 1                                                                                                                                                   | Multiorgan detection and characterization of protease-resistant prion protein in a case of variant CJD examined in the United States.                                                    | Notari S et al.      | 20098730                  | Not a renal disease focus |
| 24 |                                                                                                                                                     |                                                                                                                                                                                          |                      |                           |                           |
| 25 | 1                                                                                                                                                   | Genetic disorders in complement (regulating) genes in patients with atypical haemolytic uraemic syndrome (aHUS).                                                                         | Westra D et al.      | 20106822                  | Not a renal disease focus |
| 26 |                                                                                                                                                     |                                                                                                                                                                                          |                      |                           |                           |
| 27 | 1                                                                                                                                                   | CYP4F2 gene V433M polymorphism is associated with ischemic stroke in the male Northern Chinese Han population.                                                                           | Deng S et al.        | 20227456                  | Not a renal disease focus |
| 28 |                                                                                                                                                     |                                                                                                                                                                                          |                      |                           |                           |
| 29 | 1                                                                                                                                                   | Subtype-specific FBXW7 mutation and MYCN copy number gain in Wilms' tumor.                                                                                                               | Williams RD et al.   | 20332316                  | Not a renal disease focus |
| 30 |                                                                                                                                                     |                                                                                                                                                                                          |                      |                           |                           |
| 31 | 1                                                                                                                                                   | Association of selected variants in genes involved in cell cycle and apoptosis with bladder cancer risk in North Indian population.                                                      | Gangwar R et al.     | 20380574                  | Not a renal disease focus |
| 32 |                                                                                                                                                     |                                                                                                                                                                                          |                      |                           |                           |
| 33 | 1                                                                                                                                                   | Association of CAPN10 gene with insulin sensitivity, glucose tolerance and renal function in essential hypertensive patients.                                                            | Zhou X et al.        | 20406624                  | Not a renal disease focus |
| 34 |                                                                                                                                                     |                                                                                                                                                                                          |                      |                           |                           |
| 35 |                                                                                                                                                     |                                                                                                                                                                                          |                      |                           |                           |
| 36 |                                                                                                                                                     |                                                                                                                                                                                          |                      |                           |                           |
| 37 |                                                                                                                                                     |                                                                                                                                                                                          |                      |                           |                           |
| 38 |                                                                                                                                                     |                                                                                                                                                                                          |                      |                           |                           |
| 39 |                                                                                                                                                     |                                                                                                                                                                                          |                      |                           |                           |
| 40 |                                                                                                                                                     |                                                                                                                                                                                          |                      |                           |                           |
| 41 |                                                                                                                                                     |                                                                                                                                                                                          |                      |                           |                           |
| 42 |                                                                                                                                                     |                                                                                                                                                                                          |                      |                           |                           |
| 43 |                                                                                                                                                     |                                                                                                                                                                                          |                      |                           |                           |
| 44 |                                                                                                                                                     |                                                                                                                                                                                          |                      |                           |                           |
| 45 |                                                                                                                                                     |                                                                                                                                                                                          |                      |                           |                           |
| 46 |                                                                                                                                                     |                                                                                                                                                                                          |                      |                           |                           |

|    |   |                                                                                                                                                          |                          |          |                           |
|----|---|----------------------------------------------------------------------------------------------------------------------------------------------------------|--------------------------|----------|---------------------------|
| 1  | 1 | Clinical and molecular features of familial and sporadic cases of von Hippel-Lindau disease from Mexico.                                                 | Chacon-Camacho OF et al. | 20447124 | Not a renal disease focus |
| 2  | 1 | N-glycosylation of carnosinase influences protein secretion and enzyme activity: implications for hyperglycemia.                                         | Riedl E et al.           | 20460427 | Not a renal disease focus |
| 3  | 1 | Combined classical cytogenetics and microarray-based genomic copy number analysis reveal frequent 3;5 rearrangements in clear cell renal cell carcinoma. | Pei J et al.             | 20461753 | Not a renal disease focus |
| 4  | 1 | The association of glutathione-S-transferase gene polymorphisms (GSTM1, GSTT1, GSTP1) with idiopathic male infertility.                                  | Safarinejad MR et al.    | 20505681 | Not a renal disease focus |
| 5  | 1 | The non-muscle Myosin heavy chain 9 gene (MYH9) is not associated with lupus nephritis in African Americans.                                             | Freedman BI et al.       | 20523037 | Not a renal disease focus |
| 6  | 1 | Association of the genetic polymorphisms of the ACE gene and the eNOS gene with lupus nephropathy in northern Chinese population.                        | Li X et al.              | 20540812 | Not a renal disease focus |
| 7  | 1 | eNOS gene polymorphism association with retinopathy in type 1 diabetes.                                                                                  | Bazzaz JT et al.         | 20565248 | Not a renal disease focus |
| 8  | 1 | Clinical and molecular characterization of Brazilian families with von Hippel-Lindau disease: a need for delineating genotype-phenotype correlation.     | Gomy I et al.            | 20567917 | Not a renal disease focus |
| 9  | 1 | Functional polymorphisms in cell death pathway genes and risk of renal cell carcinoma.                                                                   | Zhu J et al.             | 20572163 | Not a renal disease focus |
| 10 | 1 | Role of MMP-3 and MMP-9 and their haplotypes in risk of bladder cancer in North Indian cohort.                                                           | Srivastava P et al.      | 20574775 | Not a renal disease focus |
| 11 | 1 | The role of endothelial nitric oxide synthase (eNOS) T-786C, G894T, and 4a/b gene polymorphisms in the risk of idiopathic male infertility.              | Safarinejad MR et al.    | 20586099 | Not a renal disease focus |
| 12 | 1 | Polymorphic variants of DNA repair gene XRCC3 and XRCC7 and risk of prostate cancer: a study from North Indian population.                               | Mandal RK et al.         | 20590474 | Not a renal disease focus |
| 13 | 1 | Association of TNFAIP3 polymorphism with susceptibility to systemic lupus erythematosus in a Japanese population.                                        | Kawasaki A et al.        | 20617138 | Not a renal disease focus |
| 14 | 1 | Functional polymorphisms in the CYP3A4, CYP3A5, and CYP21A2 genes in the risk for hypertension in pregnancy.                                             | Coto E et al.            | 20617557 | Not a renal disease focus |
| 15 | 1 | Functional polymorphism of the CK2alpha intronless gene plays oncogenic roles in lung cancer.                                                            | Hung MS et al.           | 20625391 | Not a renal disease focus |



|    |                                                                                                                                             |                                                                                                                                                         |                          |                           |                           |
|----|---------------------------------------------------------------------------------------------------------------------------------------------|---------------------------------------------------------------------------------------------------------------------------------------------------------|--------------------------|---------------------------|---------------------------|
| 1  | Occupational trichloroethylene exposure and renal carcinoma risk: evidence of genetic susceptibility by reductive metabolism gene variants. | Moore LE et al.                                                                                                                                         | 20663906                 | Not a renal disease focus |                           |
| 2  |                                                                                                                                             |                                                                                                                                                         |                          |                           |                           |
| 3  |                                                                                                                                             |                                                                                                                                                         |                          |                           |                           |
| 4  |                                                                                                                                             |                                                                                                                                                         |                          |                           |                           |
| 5  |                                                                                                                                             |                                                                                                                                                         |                          |                           |                           |
| 6  | 1                                                                                                                                           | Influence of caspases 8 and 9 gene promoter polymorphism on prostate cancer susceptibility and early development of hormone refractory prostate cancer. | Kesarwani P et al.       | 20804486                  | Not a renal disease focus |
| 7  |                                                                                                                                             |                                                                                                                                                         |                          |                           |                           |
| 8  |                                                                                                                                             |                                                                                                                                                         |                          |                           |                           |
| 9  | 1                                                                                                                                           | Are cell cycle and apoptosis genes associated with prostate cancer risk in North Indian population?                                                     | Mandal RK et al.         | 20822933                  | Not a renal disease focus |
| 10 |                                                                                                                                             |                                                                                                                                                         |                          |                           |                           |
| 11 |                                                                                                                                             |                                                                                                                                                         |                          |                           |                           |
| 12 | 1                                                                                                                                           | Bladder cancer risk associated with genotypic polymorphism of the matrix metalloproteinase-1 and 7 in North Indian population.                          | Srivastava P et al.      | 20826916                  | Not a renal disease focus |
| 13 |                                                                                                                                             |                                                                                                                                                         |                          |                           |                           |
| 14 | 1                                                                                                                                           | Association of TNFAIP3 interacting protein 1, TNIP1 with systemic lupus erythematosus in a Japanese population: a case-control association study.       | Kawasaki A et al.        | 20849588                  | Not a renal disease focus |
| 15 |                                                                                                                                             |                                                                                                                                                         |                          |                           |                           |
| 16 |                                                                                                                                             |                                                                                                                                                         |                          |                           |                           |
| 17 | 1                                                                                                                                           | S-adenosyl methionine improves early viral responses and interferon-stimulated gene induction in hepatitis C nonresponders.                             | Feld JJ et al.           | 20854821                  | Not a renal disease focus |
| 18 |                                                                                                                                             |                                                                                                                                                         |                          |                           |                           |
| 19 |                                                                                                                                             |                                                                                                                                                         |                          |                           |                           |
| 20 | 1                                                                                                                                           | Phosphodiesterase 11A (PDE11A) genetic variants may increase susceptibility to prostatic cancer.                                                        | Faucz FR et al.          | 20881257                  | Not a renal disease focus |
| 21 |                                                                                                                                             |                                                                                                                                                         |                          |                           |                           |
| 22 | 1                                                                                                                                           | A functional variant of the NEDD4L gene is associated with beneficial treatment response with $\beta$ -blockers and diuretics in hypertensive patients. | Svensson-Farbom P et al. | 21052022                  | Not a renal disease focus |
| 23 |                                                                                                                                             |                                                                                                                                                         |                          |                           |                           |
| 24 |                                                                                                                                             |                                                                                                                                                         |                          |                           |                           |
| 25 | 1                                                                                                                                           | Characterization of UDP-glucuronosyltransferase 2A1 (UGT2A1) variants and their potential role in tobacco carcinogenesis.                               | Bushey RT et al.         | 21164388                  | Not a renal disease focus |
| 26 |                                                                                                                                             |                                                                                                                                                         |                          |                           |                           |
| 27 | 1                                                                                                                                           | hOGG1 Ser326Cys polymorphism and renal cell carcinoma risk in a Chinese population.                                                                     | Zhao H et al.            | 21166493                  | Not a renal disease focus |
| 28 |                                                                                                                                             |                                                                                                                                                         |                          |                           |                           |
| 29 |                                                                                                                                             |                                                                                                                                                         |                          |                           |                           |
| 30 | 1                                                                                                                                           | Cancer risks for monoallelic MUTYH mutation carriers with a family history of colorectal cancer.                                                        | Win AK et al.            | 21171015                  | Not a renal disease focus |
| 31 |                                                                                                                                             |                                                                                                                                                         |                          |                           |                           |
| 32 | 1                                                                                                                                           | Isocitrate dehydrogenase 1/2 mutational analyses and 2-hydroxyglutarate measurements in Wilms tumors.                                                   | Rakheja D et al.         | 21225914                  | Not a renal disease focus |
| 33 |                                                                                                                                             |                                                                                                                                                         |                          |                           |                           |
| 34 | 1                                                                                                                                           | A WNK4 gene variant relates to osteoporosis and not to hypertension in the Portuguese population.                                                       | Mendes AI et al.         | 21236712                  | Not a renal disease focus |
| 35 |                                                                                                                                             |                                                                                                                                                         |                          |                           |                           |
| 36 | 1                                                                                                                                           | Three novel mutations in the PHEX gene in Chinese subjects with hypophosphatemic rickets extends genotypic variability.                                 | Jap TS et al.            | 21293852                  | Not a renal disease focus |
| 37 |                                                                                                                                             |                                                                                                                                                         |                          |                           |                           |
| 38 |                                                                                                                                             |                                                                                                                                                         |                          |                           |                           |
| 39 |                                                                                                                                             |                                                                                                                                                         |                          |                           |                           |
| 40 |                                                                                                                                             |                                                                                                                                                         |                          |                           |                           |
| 41 |                                                                                                                                             |                                                                                                                                                         |                          |                           |                           |
| 42 |                                                                                                                                             |                                                                                                                                                         |                          |                           |                           |
| 43 |                                                                                                                                             |                                                                                                                                                         |                          |                           |                           |
| 44 |                                                                                                                                             |                                                                                                                                                         |                          |                           |                           |
| 45 |                                                                                                                                             |                                                                                                                                                         |                          |                           |                           |
| 46 |                                                                                                                                             |                                                                                                                                                         |                          |                           |                           |



|    |   |                                                                                                                                                                                            |                           |          |                           |
|----|---|--------------------------------------------------------------------------------------------------------------------------------------------------------------------------------------------|---------------------------|----------|---------------------------|
| 1  | 1 | Bimodal distribution of RNA expression levels in human skeletal muscle tissue.                                                                                                             | Mason CC et al.           | 21299892 | Not a renal disease focus |
| 2  | 1 | Investigating paraoxonase-1 gene Q192R and L55M polymorphism in patients with renal cell cancer.                                                                                           | Uyar OA et al.            | 21308654 | Not a renal disease focus |
| 3  | 1 | The presence of PAI-1 4G/5G and ACE DD genotypes increases the risk of early-stage AVF thrombosis in hemodialysis patients.                                                                | Gungor Y et al.           | 21332339 | Not a renal disease focus |
| 4  | 1 | Association of genetic polymorphisms of CYP 2C19 with hypertension in a Chinese Han population.                                                                                            | Ma Y et al.               | 21332417 | Not a renal disease focus |
| 5  | 1 | Association between renin-angiotensin-aldosterone system-related genes and blood pressure in a Korean population.                                                                          | Song SB et al.            | 21342026 | Not a renal disease focus |
| 6  | 1 | Admixture aberration analysis: application to mapping in admixed population using pooled DNA.                                                                                              | Bercovici S et al.        | 21385031 | Not a renal disease focus |
| 7  | 1 | Polymorphisms and haplotypes in caspases 8 and 9 genes and risk for prostate cancer: a case-control study in cohort of North India.                                                        | George GP et al.          | 21396853 | Not a renal disease focus |
| 8  | 1 | A novel MECA3 region in human 3p21.3 harboring putative tumor suppressor genes and oncogenes.                                                                                              | Braga E et al.            | 21423093 | Not a renal disease focus |
| 9  | 1 | GSTT1, GSTM1, and CYP1B1 gene polymorphisms and susceptibility to sporadic renal cell cancer.                                                                                              | Salinas-Sanchez AS et al. | 21458313 | Not a renal disease focus |
| 10 | 1 | Insertion/deletion polymorphism of angiotensin I-converting enzyme gene is linked with chromophobe renal cell carcinoma.                                                                   | de Martino M et al.       | 21477733 | Not a renal disease focus |
| 11 | 1 | Genetic polymorphisms in APE1 are associated with renal cell carcinoma risk in a Chinese population.                                                                                       | Cao Q et al.              | 21538578 | Not a renal disease focus |
| 12 | 1 | In vitro transforming potential, intracellular signaling properties, and sensitivity to a kinase inhibitor (sorafenib) of RET proto-oncogene variants Glu511Lys, Ser649Leu, and Arg886Trp. | Prazeres H et al.         | 21551259 | Not a renal disease focus |
| 13 | 1 | Hypercholesterolemia and a candidate gene within the 12q24 locus.                                                                                                                          | Gragnoli C.               | 21554682 | Not a renal disease focus |
| 14 | 1 | Lack of association of Klotho gene variants with valvular and vascular calcification in Caucasians: a candidate gene study of the Framingham Offspring Cohort.                             | Tangri N et al.           | 21565945 | Not a renal disease focus |

|    |                                                                                                                                                                                          |                                                                                                                                                                                                       |                             |                           |                           |
|----|------------------------------------------------------------------------------------------------------------------------------------------------------------------------------------------|-------------------------------------------------------------------------------------------------------------------------------------------------------------------------------------------------------|-----------------------------|---------------------------|---------------------------|
| 1  | Clear-cell papillary renal cell carcinoma: molecular and immunohistochemical analysis with emphasis on the von Hippel-Lindau gene and hypoxia-inducible factor pathway-related proteins. | Rohan SM et al.                                                                                                                                                                                       | 21602815                    | Not a renal disease focus |                           |
| 2  |                                                                                                                                                                                          |                                                                                                                                                                                                       |                             |                           |                           |
| 3  |                                                                                                                                                                                          |                                                                                                                                                                                                       |                             |                           |                           |
| 4  |                                                                                                                                                                                          |                                                                                                                                                                                                       |                             |                           |                           |
| 5  |                                                                                                                                                                                          |                                                                                                                                                                                                       |                             |                           |                           |
| 6  | 1                                                                                                                                                                                        | Selected AGXT gene mutations analysis provides a genetic diagnosis in 28% of Tunisian patients with primary hyperoxaluria.                                                                            | Benhaj Mbarek I et al.      | 21612638                  | Not a renal disease focus |
| 7  |                                                                                                                                                                                          |                                                                                                                                                                                                       |                             |                           |                           |
| 8  |                                                                                                                                                                                          |                                                                                                                                                                                                       |                             |                           |                           |
| 9  |                                                                                                                                                                                          |                                                                                                                                                                                                       |                             |                           |                           |
| 10 | 1                                                                                                                                                                                        | Familial renal cell carcinoma from the Swedish Family-Cancer Database.                                                                                                                                | Liu H et al.                | 21621909                  | Not a renal disease focus |
| 11 |                                                                                                                                                                                          |                                                                                                                                                                                                       |                             |                           |                           |
| 12 | 1                                                                                                                                                                                        | Adult renal cell carcinoma with rhabdoid morphology represents a neoplastic dedifferentiation analogous to sarcomatoid carcinoma.                                                                     | Chapman-Fredricks JR et al. | 21665507                  | Not a renal disease focus |
| 13 |                                                                                                                                                                                          |                                                                                                                                                                                                       |                             |                           |                           |
| 14 | 1                                                                                                                                                                                        | Association of caspases with an increased prostate cancer risk in north Indian population.                                                                                                            | Mittal RD et al.            | 21668377                  | Not a renal disease focus |
| 15 |                                                                                                                                                                                          |                                                                                                                                                                                                       |                             |                           |                           |
| 16 | 1                                                                                                                                                                                        | Association of death receptor 4, Caspase 3 and 5 gene polymorphism with increased risk to bladder cancer in North Indians.                                                                            | Mittal RD et al.            | 21700414                  | Not a renal disease focus |
| 17 |                                                                                                                                                                                          |                                                                                                                                                                                                       |                             |                           |                           |
| 18 | 1                                                                                                                                                                                        | The polymorphisms in the VHL and HIF1A genes are associated with the prognosis but not the development of renal cell carcinoma.                                                                       | Qin C et al.                | 21778301                  | Not a renal disease focus |
| 19 |                                                                                                                                                                                          |                                                                                                                                                                                                       |                             |                           |                           |
| 20 | 1                                                                                                                                                                                        | Association of single nucleotide polymorphisms in promoter of matrix metalloproteinase-2, 8 genes with bladder cancer risk in Northern India.                                                         | Srivastava P et al.         | 21784671                  | Not a renal disease focus |
| 21 |                                                                                                                                                                                          |                                                                                                                                                                                                       |                             |                           |                           |
| 22 | 1                                                                                                                                                                                        | Association of PTPN22 gene polymorphism and systemic lupus erythematosus in a cohort of Egyptian patients: impact on clinical and laboratory results.                                                 | Moez P et al.               | 21818561                  | Not a renal disease focus |
| 23 |                                                                                                                                                                                          |                                                                                                                                                                                                       |                             |                           |                           |
| 24 | 1                                                                                                                                                                                        | Thrombotic events in MYH9 gene-related autosomal macrothrombocytopenias (old May-Hegglin, Sebastian, Fechtner and Epstein syndromes).                                                                 | Girolami A et al.           | 21842307                  | Not a renal disease focus |
| 25 |                                                                                                                                                                                          |                                                                                                                                                                                                       |                             |                           |                           |
| 26 | 1                                                                                                                                                                                        | JAK3 in clear cell renal cell carcinoma: mutational screening and clinical implications.                                                                                                              | de Martino M et al.         | 21868263                  | Not a renal disease focus |
| 27 |                                                                                                                                                                                          |                                                                                                                                                                                                       |                             |                           |                           |
| 28 | 1                                                                                                                                                                                        | Genetic diagnosis of X-linked dominant Hypophosphatemic Rickets in a cohort study: tubular reabsorption of phosphate and 1,25(OH) <sub>2</sub> D serum levels are associated with PHEX mutation type. | Morey M et al.              | 21902834                  | Not a renal disease focus |
| 29 |                                                                                                                                                                                          |                                                                                                                                                                                                       |                             |                           |                           |
| 30 | 1                                                                                                                                                                                        | Gene-gene interaction of BLK, TNFSF4, TRAF1, TNFAIP3, and REL in systemic lupus erythematosus.                                                                                                        | Zhou XJ et al.              | 21905002                  | Not a renal disease focus |
| 31 |                                                                                                                                                                                          |                                                                                                                                                                                                       |                             |                           |                           |
| 32 | 1                                                                                                                                                                                        | Vitamin D receptor FokI and BsmI gene polymorphism and its association with grade and stage of renal cell carcinoma in North Indian population.                                                       | Arjumand W et al.           | 21931993                  | Not a renal disease focus |
| 33 |                                                                                                                                                                                          |                                                                                                                                                                                                       |                             |                           |                           |
| 34 |                                                                                                                                                                                          |                                                                                                                                                                                                       |                             |                           |                           |
| 35 |                                                                                                                                                                                          |                                                                                                                                                                                                       |                             |                           |                           |
| 36 |                                                                                                                                                                                          |                                                                                                                                                                                                       |                             |                           |                           |
| 37 |                                                                                                                                                                                          |                                                                                                                                                                                                       |                             |                           |                           |
| 38 |                                                                                                                                                                                          |                                                                                                                                                                                                       |                             |                           |                           |
| 39 |                                                                                                                                                                                          |                                                                                                                                                                                                       |                             |                           |                           |
| 40 |                                                                                                                                                                                          |                                                                                                                                                                                                       |                             |                           |                           |
| 41 |                                                                                                                                                                                          |                                                                                                                                                                                                       |                             |                           |                           |
| 42 |                                                                                                                                                                                          |                                                                                                                                                                                                       |                             |                           |                           |
| 43 |                                                                                                                                                                                          |                                                                                                                                                                                                       |                             |                           |                           |
| 44 |                                                                                                                                                                                          |                                                                                                                                                                                                       |                             |                           |                           |
| 45 |                                                                                                                                                                                          |                                                                                                                                                                                                       |                             |                           |                           |
| 46 |                                                                                                                                                                                          |                                                                                                                                                                                                       |                             |                           |                           |

|    |                                                                                                                 |                                                                                                                                                                                |                     |                           |                           |
|----|-----------------------------------------------------------------------------------------------------------------|--------------------------------------------------------------------------------------------------------------------------------------------------------------------------------|---------------------|---------------------------|---------------------------|
| 1  | The polymorphisms of P53 codon 72 and MDM2 SNP309 and renal cell carcinoma risk in a low arsenic exposure area. | Huang CY et al.                                                                                                                                                                | 21982800            | Not a renal disease focus |                           |
| 2  |                                                                                                                 |                                                                                                                                                                                |                     |                           |                           |
| 3  |                                                                                                                 |                                                                                                                                                                                |                     |                           |                           |
| 4  | 1                                                                                                               | Risk factor for clear cell renal cell carcinoma in Chinese population: a case-control study.                                                                                   | Wang G et al.       | 22000673                  | Not a renal disease focus |
| 5  |                                                                                                                 |                                                                                                                                                                                |                     |                           |                           |
| 6  | 1                                                                                                               | Base excision repair pathway genes polymorphism in prostate and bladder cancer risk in North Indian population.                                                                | Mittal RD et al.    | 22019847                  | Not a renal disease focus |
| 7  |                                                                                                                 |                                                                                                                                                                                |                     |                           |                           |
| 8  | 1                                                                                                               | Von Hippel-Lindau (VHL) inactivation in sporadic clear cell renal cancer: associations with germline VHL polymorphisms and etiologic risk factors.                             | Moore LE et al.     | 22022277                  | Not a renal disease focus |
| 9  |                                                                                                                 |                                                                                                                                                                                |                     |                           |                           |
| 10 | 1                                                                                                               | Impact of glutathione transferase M1, T1, and P1 gene polymorphisms in the genetic susceptibility of North Indian population to renal cell carcinoma.                          | Ahmad ST et al.     | 22054067                  | Not a renal disease focus |
| 11 |                                                                                                                 |                                                                                                                                                                                |                     |                           |                           |
| 12 | 1                                                                                                               | Whole-exome sequencing of human pancreatic cancers and characterization of genomic instability caused by MLH1 haploinsufficiency and complete deficiency.                      | Wang L et al.       | 22156295                  | Not a renal disease focus |
| 13 |                                                                                                                 |                                                                                                                                                                                |                     |                           |                           |
| 14 | 1                                                                                                               | Association between urothelial carcinoma after kidney transplantation and aristolochic acid exposure: the potential role of aristolochic acid in HRas and TP53 gene mutations. | Xiao J et al.       | 22172840                  | Not a renal disease focus |
| 15 |                                                                                                                 |                                                                                                                                                                                |                     |                           |                           |
| 16 | 1                                                                                                               | Mapping of the UGT1A locus identifies an uncommon coding variant that affects mRNA expression and protects from bladder cancer.                                                | Tang W et al.       | 22228101                  | Not a renal disease focus |
| 17 |                                                                                                                 |                                                                                                                                                                                |                     |                           |                           |
| 18 | 1                                                                                                               | Paravertebral ligament ossification in vitamin D-resistant rickets: incidence, clinical significance, and genetic evaluation.                                                  | Lee SH et al.       | 22261628                  | Not a renal disease focus |
| 19 |                                                                                                                 |                                                                                                                                                                                |                     |                           |                           |
| 20 | 1                                                                                                               | Risk of renal cell carcinoma and polymorphism in phase I xenobiotic metabolizing CYP1A1 and CYP2D6 enzymes.                                                                    | Ahmad ST et al.     | 22281432                  | Not a renal disease focus |
| 21 |                                                                                                                 |                                                                                                                                                                                |                     |                           |                           |
| 22 | 1                                                                                                               | Relationship between CYP1A1 genetic polymorphisms and renal cancer in China.                                                                                                   | Chen J et al.       | 22296350                  | Not a renal disease focus |
| 23 |                                                                                                                 |                                                                                                                                                                                |                     |                           |                           |
| 24 | 1                                                                                                               | Genetic variations in the ADAMTS12 gene are associated with schizophrenia in Puerto Rican patients of Spanish descent.                                                         | Bespalova IN et al. | 22322903                  | Not a renal disease focus |
| 25 |                                                                                                                 |                                                                                                                                                                                |                     |                           |                           |
| 26 | 1                                                                                                               | Association of promoter polymorphisms in MMP2 and TIMP2 with prostate cancer susceptibility in North India.                                                                    | Srivastava P et al. | 22374248                  | Not a renal disease focus |
| 27 |                                                                                                                 |                                                                                                                                                                                |                     |                           |                           |
| 28 | 1                                                                                                               | Polymorphisms in base-excision & nucleotide-excision repair genes & prostate cancer risk in north Indian population.                                                           | Mandal RK et al.    | 22382185                  | Not a renal disease focus |
| 29 |                                                                                                                 |                                                                                                                                                                                |                     |                           |                           |
| 30 | 1                                                                                                               | Common genetic variants at the 11q13.3 renal cancer susceptibility locus influence binding of HIF to an enhancer of cyclin D1 expression.                                      | Schodel J et al.    | 22406644                  | Not a renal disease focus |
| 31 |                                                                                                                 |                                                                                                                                                                                |                     |                           |                           |
| 32 |                                                                                                                 |                                                                                                                                                                                |                     |                           |                           |
| 33 |                                                                                                                 |                                                                                                                                                                                |                     |                           |                           |
| 34 |                                                                                                                 |                                                                                                                                                                                |                     |                           |                           |
| 35 |                                                                                                                 |                                                                                                                                                                                |                     |                           |                           |
| 36 |                                                                                                                 |                                                                                                                                                                                |                     |                           |                           |
| 37 |                                                                                                                 |                                                                                                                                                                                |                     |                           |                           |
| 38 |                                                                                                                 |                                                                                                                                                                                |                     |                           |                           |
| 39 |                                                                                                                 |                                                                                                                                                                                |                     |                           |                           |
| 40 |                                                                                                                 |                                                                                                                                                                                |                     |                           |                           |
| 41 |                                                                                                                 |                                                                                                                                                                                |                     |                           |                           |
| 42 |                                                                                                                 |                                                                                                                                                                                |                     |                           |                           |
| 43 |                                                                                                                 |                                                                                                                                                                                |                     |                           |                           |
| 44 |                                                                                                                 |                                                                                                                                                                                |                     |                           |                           |
| 45 |                                                                                                                 |                                                                                                                                                                                |                     |                           |                           |
| 46 |                                                                                                                 |                                                                                                                                                                                |                     |                           |                           |

|    |                                                                                                                |                                                                                                                                                      |                           |                           |                           |
|----|----------------------------------------------------------------------------------------------------------------|------------------------------------------------------------------------------------------------------------------------------------------------------|---------------------------|---------------------------|---------------------------|
| 1  | Mutation screening of the EYA1, SIX1, and SIX5 genes in an East Asian cohort with branchio-oto-renal syndrome. | Wang SH et al.                                                                                                                                       | 22447252                  | Not a renal disease focus |                           |
| 2  |                                                                                                                |                                                                                                                                                      |                           |                           |                           |
| 3  |                                                                                                                |                                                                                                                                                      |                           |                           |                           |
| 4  |                                                                                                                |                                                                                                                                                      |                           |                           |                           |
| 5  |                                                                                                                |                                                                                                                                                      |                           |                           |                           |
| 6  | 1                                                                                                              | Association of Ku70 A-31G polymorphism and risk of renal cell carcinoma in a Chinese population.                                                     | Wang W et al.             | 22455395                  | Not a renal disease focus |
| 7  |                                                                                                                |                                                                                                                                                      |                           |                           |                           |
| 8  | 1                                                                                                              | INPPL1 is associated with the metabolic syndrome in men with Type 1 diabetes, but not with diabetic nephropathy.                                     | Hyvonen ME et al.         | 22486725                  | Not a renal disease focus |
| 9  |                                                                                                                |                                                                                                                                                      |                           |                           |                           |
| 10 | 1                                                                                                              | MicroRNA target site polymorphisms in the VHL-HIF1 $\alpha$ pathway predict renal cell carcinoma risk.                                               | Wei H et al.              | 22517515                  | Not a renal disease focus |
| 11 |                                                                                                                |                                                                                                                                                      |                           |                           |                           |
| 12 | 1                                                                                                              | A two-stage matched case-control study on multiple hypertensive candidate genes in Han Chinese.                                                      | Kuo TY et al.             | 22534794                  | Not a renal disease focus |
| 13 |                                                                                                                |                                                                                                                                                      |                           |                           |                           |
| 14 | 1                                                                                                              | Somatic mutation analysis of the SDHB, SDHC, SDHD, and RET genes in the clinical assessment of sporadic and hereditary pheochromocytoma.             | Weber A et al.            | 22573489                  | Not a renal disease focus |
| 15 |                                                                                                                |                                                                                                                                                      |                           |                           |                           |
| 16 | 1                                                                                                              | Mutational analysis of patients with FGF23-related hypophosphatemic rickets.                                                                         | Kinoshita Y et al.        | 22577109                  | Not a renal disease focus |
| 17 |                                                                                                                |                                                                                                                                                      |                           |                           |                           |
| 18 | 1                                                                                                              | A functional polymorphism C-1310G in the promoter region of Ku70/XRCC6 is associated with risk of renal cell carcinoma.                              | Wang W et al.             | 22593040                  | Not a renal disease focus |
| 19 |                                                                                                                |                                                                                                                                                      |                           |                           |                           |
| 20 | 1                                                                                                              | Angiotensin-converting enzyme (ACE) gene II genotype protects against the development of diabetic peripheral neuropathy in type 2 diabetes mellitus. | Mansoor Q et al.          | 22607040                  | Not a renal disease focus |
| 21 |                                                                                                                |                                                                                                                                                      |                           |                           |                           |
| 22 | 1                                                                                                              | LMP2, a novel immunohistochemical marker to distinguish renal oncocytoma from the eosinophilic variant of chromophobe renal cell carcinoma.          | Zheng G et al.            | 22705098                  | Not a renal disease focus |
| 23 |                                                                                                                |                                                                                                                                                      |                           |                           |                           |
| 24 | 1                                                                                                              | BRAF mutations in metanephric adenoma of the kidney.                                                                                                 | Choueiri T et al.         | 22727996                  | Not a renal disease focus |
| 25 |                                                                                                                |                                                                                                                                                      |                           |                           |                           |
| 26 | 1                                                                                                              | Resequencing the whole MYH7 gene (including the intronic, promoter, and 3' UTR sequences) in hypertrophic cardiomyopathy.                            | Coto E et al.             | 22765922                  | Not a renal disease focus |
| 27 |                                                                                                                |                                                                                                                                                      |                           |                           |                           |
| 28 | 1                                                                                                              | Higher frequency of paraoxonase gene polymorphism and cardiovascular impairment among Brazilian Fabry Disease patients.                              | Barris-Oliveira AC et al. | 22796398                  | Not a renal disease focus |
| 29 |                                                                                                                |                                                                                                                                                      |                           |                           |                           |
| 30 | 1                                                                                                              | Paraoxonase 1 (PON1) C/T-108 association with longitudinal mean arterial blood pressure.                                                             | Bhatnagar V et al.        | 22854640                  | Not a renal disease focus |
| 31 |                                                                                                                |                                                                                                                                                      |                           |                           |                           |
| 32 |                                                                                                                |                                                                                                                                                      |                           |                           |                           |
| 33 |                                                                                                                |                                                                                                                                                      |                           |                           |                           |
| 34 |                                                                                                                |                                                                                                                                                      |                           |                           |                           |
| 35 |                                                                                                                |                                                                                                                                                      |                           |                           |                           |
| 36 |                                                                                                                |                                                                                                                                                      |                           |                           |                           |
| 37 |                                                                                                                |                                                                                                                                                      |                           |                           |                           |
| 38 |                                                                                                                |                                                                                                                                                      |                           |                           |                           |
| 39 |                                                                                                                |                                                                                                                                                      |                           |                           |                           |
| 40 |                                                                                                                |                                                                                                                                                      |                           |                           |                           |
| 41 |                                                                                                                |                                                                                                                                                      |                           |                           |                           |
| 42 |                                                                                                                |                                                                                                                                                      |                           |                           |                           |
| 43 |                                                                                                                |                                                                                                                                                      |                           |                           |                           |
| 44 |                                                                                                                |                                                                                                                                                      |                           |                           |                           |
| 45 |                                                                                                                |                                                                                                                                                      |                           |                           |                           |
| 46 |                                                                                                                |                                                                                                                                                      |                           |                           |                           |

|    |                                                                                                                                                    |                                                                                                                                                                                                                                                                     |                      |                           |                           |
|----|----------------------------------------------------------------------------------------------------------------------------------------------------|---------------------------------------------------------------------------------------------------------------------------------------------------------------------------------------------------------------------------------------------------------------------|----------------------|---------------------------|---------------------------|
| 1  | Patients with Lynch syndrome mismatch repair gene mutations are at higher risk for not only upper tract urothelial cancer but also bladder cancer. | Skeldon SC et al.                                                                                                                                                                                                                                                   | 22883484             | Not a renal disease focus |                           |
| 2  |                                                                                                                                                    |                                                                                                                                                                                                                                                                     |                      |                           |                           |
| 3  |                                                                                                                                                    |                                                                                                                                                                                                                                                                     |                      |                           |                           |
| 4  |                                                                                                                                                    |                                                                                                                                                                                                                                                                     |                      |                           |                           |
| 5  |                                                                                                                                                    |                                                                                                                                                                                                                                                                     |                      |                           |                           |
| 6  |                                                                                                                                                    |                                                                                                                                                                                                                                                                     |                      |                           |                           |
| 7  |                                                                                                                                                    |                                                                                                                                                                                                                                                                     |                      |                           |                           |
| 8  | 1                                                                                                                                                  | Novel missense mutations of WNK1 in patients with hypokalemic salt-losing tubulopathies.                                                                                                                                                                            | Zhang C et al.       | 22934535                  | Not a renal disease focus |
| 9  |                                                                                                                                                    |                                                                                                                                                                                                                                                                     |                      |                           |                           |
| 10 | 1                                                                                                                                                  | Proteasome modulator 9 and depression in type 2 diabetes.                                                                                                                                                                                                           | Gragnoli C           | 22934761                  | Not a renal disease focus |
| 11 |                                                                                                                                                    |                                                                                                                                                                                                                                                                     |                      |                           |                           |
| 12 | 1                                                                                                                                                  | Regulatory regions of the paraoxonase 1 (PON1) gene are associated with neovascular age-related macular degeneration (AMD).                                                                                                                                         | Oczos J et al.       | 22956172                  | Not a renal disease focus |
| 13 |                                                                                                                                                    |                                                                                                                                                                                                                                                                     |                      |                           |                           |
| 14 | 1                                                                                                                                                  | New insights into Dok-4 PTB domain structure and function.                                                                                                                                                                                                          | Hooker E et al.      | 22982678                  | Not a renal disease focus |
| 15 |                                                                                                                                                    |                                                                                                                                                                                                                                                                     |                      |                           |                           |
| 16 | 1                                                                                                                                                  | The role of XRCC6 T-991C functional polymorphism in renal cell carcinoma.                                                                                                                                                                                           | Chang WS et al.      | 22993329                  | Not a renal disease focus |
| 17 |                                                                                                                                                    |                                                                                                                                                                                                                                                                     |                      |                           |                           |
| 18 | 1                                                                                                                                                  | Integrated multiplex ligation dependent probe amplification (MLPA) assays for the detection of alterations in the HEXB, GM2A and SMARCA1 genes to support the diagnosis of Morbus Sandhoff, M. Tay-Sachs variant AB and Schimke immuno-osseous dysplasia in humans. | Sobek AK et al.      | 23010210                  | Not a renal disease focus |
| 19 |                                                                                                                                                    |                                                                                                                                                                                                                                                                     |                      |                           |                           |
| 20 | 1                                                                                                                                                  | Endothelial nitric oxide synthase Glu298Asp polymorphism as a risk factor for prostate cancer.                                                                                                                                                                      | Ziaei SA et al.      | 23015399                  | Not a renal disease focus |
| 21 |                                                                                                                                                    |                                                                                                                                                                                                                                                                     |                      |                           |                           |
| 22 | 1                                                                                                                                                  | Calpain-10 gene polymorphisms in type 2 diabetes and its micro- and macrovascular complications.                                                                                                                                                                    | Buraczynska M et al. | 23021796                  | Not a renal disease focus |
| 23 |                                                                                                                                                    |                                                                                                                                                                                                                                                                     |                      |                           |                           |
| 24 | 1                                                                                                                                                  | Genetic variants in metabolizing genes NQO1, NQO2, MTHFR and risk of prostate cancer: a study from North India.                                                                                                                                                     | Mandal RK et al.     | 23054000                  | Not a renal disease focus |
| 25 |                                                                                                                                                    |                                                                                                                                                                                                                                                                     |                      |                           |                           |
| 26 | 1                                                                                                                                                  | Soluble FLT1 binds lipid microdomains in podocytes to control cell morphology and glomerular barrier function.                                                                                                                                                      | Jin J et al.         | 23063127                  | Not a renal disease focus |
| 27 |                                                                                                                                                    |                                                                                                                                                                                                                                                                     |                      |                           |                           |
| 28 | 1                                                                                                                                                  | Polymorphism in protein tyrosine phosphatase receptor delta is associated with the risk of clear cell renal cell carcinoma.                                                                                                                                         | Du Y et al.          | 23069849                  | Not a renal disease focus |
| 29 |                                                                                                                                                    |                                                                                                                                                                                                                                                                     |                      |                           |                           |
| 30 | 1                                                                                                                                                  | Impact of glutathione S-transferase T1 gene polymorphisms on acute cellular rejection in living donor liver transplantation.                                                                                                                                        | Kamei H et al.       | 23153768                  | Not a renal disease focus |
| 31 |                                                                                                                                                    |                                                                                                                                                                                                                                                                     |                      |                           |                           |
| 32 | 1                                                                                                                                                  | Interaction of C1GALT1-IL5RA on the susceptibility to IgA nephropathy in Southern Han Chinese.                                                                                                                                                                      | Wang W et al.        | 23190752                  | Not a renal disease focus |
| 33 |                                                                                                                                                    |                                                                                                                                                                                                                                                                     |                      |                           |                           |
| 34 | 1                                                                                                                                                  | A functional variant in the MTOR promoter modulates its expression and is associated with renal cell cancer risk.                                                                                                                                                   | Cao Q et al.         | 23209702                  | Not a renal disease focus |
| 35 |                                                                                                                                                    |                                                                                                                                                                                                                                                                     |                      |                           |                           |
| 36 |                                                                                                                                                    |                                                                                                                                                                                                                                                                     |                      |                           |                           |
| 37 |                                                                                                                                                    |                                                                                                                                                                                                                                                                     |                      |                           |                           |
| 38 |                                                                                                                                                    |                                                                                                                                                                                                                                                                     |                      |                           |                           |
| 39 |                                                                                                                                                    |                                                                                                                                                                                                                                                                     |                      |                           |                           |
| 40 |                                                                                                                                                    |                                                                                                                                                                                                                                                                     |                      |                           |                           |
| 41 |                                                                                                                                                    |                                                                                                                                                                                                                                                                     |                      |                           |                           |
| 42 |                                                                                                                                                    |                                                                                                                                                                                                                                                                     |                      |                           |                           |
| 43 |                                                                                                                                                    |                                                                                                                                                                                                                                                                     |                      |                           |                           |
| 44 |                                                                                                                                                    |                                                                                                                                                                                                                                                                     |                      |                           |                           |
| 45 |                                                                                                                                                    |                                                                                                                                                                                                                                                                     |                      |                           |                           |
| 46 |                                                                                                                                                    |                                                                                                                                                                                                                                                                     |                      |                           |                           |

|    |                                                                                                                                                                                                                  |               |          |                           |
|----|------------------------------------------------------------------------------------------------------------------------------------------------------------------------------------------------------------------|---------------|----------|---------------------------|
| 1  | Association of the formiminotransferase N-terminal sub-domain containing gene and thrombospondin, type 1, domain-containing 7A gene with the prevalence of vertebral fracture in 2427 consecutive autopsy cases. | Zhou H et al. | 23303384 | Not a renal disease focus |
| 2  |                                                                                                                                                                                                                  |               |          |                           |
| 3  |                                                                                                                                                                                                                  |               |          |                           |
| 4  |                                                                                                                                                                                                                  |               |          |                           |
| 5  |                                                                                                                                                                                                                  |               |          |                           |
| 6  |                                                                                                                                                                                                                  |               |          |                           |
| 7  |                                                                                                                                                                                                                  |               |          |                           |
| 8  |                                                                                                                                                                                                                  |               |          |                           |
| 9  |                                                                                                                                                                                                                  |               |          |                           |
| 10 |                                                                                                                                                                                                                  |               |          |                           |
| 11 |                                                                                                                                                                                                                  |               |          |                           |
| 12 |                                                                                                                                                                                                                  |               |          |                           |
| 13 |                                                                                                                                                                                                                  |               |          |                           |
| 14 |                                                                                                                                                                                                                  |               |          |                           |
| 15 |                                                                                                                                                                                                                  |               |          |                           |
| 16 |                                                                                                                                                                                                                  |               |          |                           |
| 17 |                                                                                                                                                                                                                  |               |          |                           |
| 18 |                                                                                                                                                                                                                  |               |          |                           |
| 19 |                                                                                                                                                                                                                  |               |          |                           |
| 20 |                                                                                                                                                                                                                  |               |          |                           |
| 21 |                                                                                                                                                                                                                  |               |          |                           |
| 22 |                                                                                                                                                                                                                  |               |          |                           |
| 23 |                                                                                                                                                                                                                  |               |          |                           |
| 24 |                                                                                                                                                                                                                  |               |          |                           |
| 25 |                                                                                                                                                                                                                  |               |          |                           |
| 26 |                                                                                                                                                                                                                  |               |          |                           |
| 27 |                                                                                                                                                                                                                  |               |          |                           |
| 28 |                                                                                                                                                                                                                  |               |          |                           |
| 29 |                                                                                                                                                                                                                  |               |          |                           |
| 30 |                                                                                                                                                                                                                  |               |          |                           |
| 31 |                                                                                                                                                                                                                  |               |          |                           |
| 32 |                                                                                                                                                                                                                  |               |          |                           |
| 33 |                                                                                                                                                                                                                  |               |          |                           |
| 34 |                                                                                                                                                                                                                  |               |          |                           |
| 35 |                                                                                                                                                                                                                  |               |          |                           |
| 36 |                                                                                                                                                                                                                  |               |          |                           |
| 37 |                                                                                                                                                                                                                  |               |          |                           |
| 38 |                                                                                                                                                                                                                  |               |          |                           |
| 39 |                                                                                                                                                                                                                  |               |          |                           |
| 40 |                                                                                                                                                                                                                  |               |          |                           |
| 41 |                                                                                                                                                                                                                  |               |          |                           |
| 42 |                                                                                                                                                                                                                  |               |          |                           |
| 43 |                                                                                                                                                                                                                  |               |          |                           |
| 44 |                                                                                                                                                                                                                  |               |          |                           |
| 45 |                                                                                                                                                                                                                  |               |          |                           |
| 46 |                                                                                                                                                                                                                  |               |          |                           |

|    |   |                                                                                                                                                                        |                         |          |                           |
|----|---|------------------------------------------------------------------------------------------------------------------------------------------------------------------------|-------------------------|----------|---------------------------|
| 1  | 1 | Klotho gene polymorphism of rs3752472 is associated with the risk of urinary calculi in the population of Han nationality in Eastern China.                            | Xu C et al.             | 23756195 | Not a renal disease focus |
| 2  | 1 | Oncocytic papillary renal cell carcinoma: a clinicopathological study emphasizing distinct morphology, extended immunohistochemical profile and cytogenetic features.  | Xia QY et al.           | 23826421 | Not a renal disease focus |
| 3  | 1 | Impact of MMP-3 and TIMP-3 gene polymorphisms on prostate cancer susceptibility in North Indian cohort.                                                                | Srivastava P et al.     | 23872201 | Not a renal disease focus |
| 4  | 1 | Clinical phenotypes of Chinese primary hyperparathyroidism patients are associated with the calcium-sensing receptor gene R990G polymorphism.                          | Han G et al.            | 23946278 | Not a renal disease focus |
| 5  | 1 | Q222R polymorphism in DNase I gene is a risk factor for nephritis in South Indian SLE patients.                                                                        | Panneer D et al.        | 23963431 | Not a renal disease focus |
| 6  | 1 | cGMP-dependent protein kinase 1 polymorphisms underlie renal sodium handling impairment.                                                                               | Citterio L et al.       | 24060892 | Not a renal disease focus |
| 7  | 1 | Cancer risk and overall survival in mismatch repair proficient hereditary non-polyposis colorectal cancer, Lynch syndrome and sporadic colorectal cancer.              | Garre P et al.          | 24061861 | Not a renal disease focus |
| 8  | 1 | Clinical and Genetic Factors Associated With Severe Hematological Toxicity in Glioblastoma Patients During Radiation Plus Temozolomide Treatment: A Prospective Study. | Lombardi G et al.       | 24064758 | Not a renal disease focus |
| 9  | 1 | Mutations in the mevalonate kinase (MVK) gene cause nonsyndromic retinitis pigmentosa.                                                                                 | Siemiatkowska AM et al. | 24084495 | Not a renal disease focus |
| 10 | 1 | Three novel mutations in the carnitine-acylcarnitine translocase (CACT) gene in patients with CACT deficiency and in healthy individuals.                              | Fukushima T et al.      | 24088670 | Not a renal disease focus |
| 11 | 1 | Delineation of PIGV mutation spectrum and associated phenotypes in hyperphosphatasia with mental retardation syndrome.                                                 | Horn D et al.           | 24129430 | Not a renal disease focus |
| 12 | 1 | Genetic variation in the GSTM3 promoter confer risk and prognosis of renal cell carcinoma by reducing gene expression.                                                 | Tan X et al.            | 24157827 | Not a renal disease focus |
| 13 | 1 | Early (2008-2010) hospital outbreak of Klebsiella pneumoniae producing OXA-48 carbapenemase in the UK.                                                                 | Thomas CP et al.        | 24207018 | Not a renal disease focus |
| 14 | 1 | RTK/ERK pathway under natural selection associated with prostate cancer.                                                                                               | Chen Y et al.           | 24223781 | Not a renal disease focus |



|    |   |                                                                                                                                                                                |                     |          |                           |
|----|---|--------------------------------------------------------------------------------------------------------------------------------------------------------------------------------|---------------------|----------|---------------------------|
| 1  | 1 | Amylase $\hat{\pm}$ -1A (AMY1A): a novel immunohistochemical marker to differentiate chromophobe renal cell carcinoma from benign oncocytoma.                                  | Jain S et al.       | 24225843 | Not a renal disease focus |
| 2  | 1 | Clear cell papillary renal cell carcinoma: a clinicopathological study emphasizing ultrastructural features and cytogenetic heterogeneity.                                     | Shi SS et al.       | 24294381 | Not a renal disease focus |
| 3  | 1 | The epidemic of extended-spectrum- $\hat{\beta}$ -lactamase-producing Escherichia coli ST131 is driven by a single highly pathogenic subclone, H30-Rx.                         | Price LB et al.     | 24345742 | Not a renal disease focus |
| 4  | 1 | Mutations in the UQCC1-interacting protein, UQCC2, cause human complex III deficiency associated with perturbed cytochrome b protein expression.                               | Tucker EJ et al.    | 24385928 | Not a renal disease focus |
| 5  | 1 | The association of endothelial nitric oxide synthase gene G894T polymorphism and serum nitric oxide concentration with microalbuminuria in patients with gestational diabetes. | Atay AE et al.      | 24403014 | Not a renal disease focus |
| 6  | 1 | Association of candidate genetic variants with restless legs syndrome in end stage renal disease: a multicenter case-control study in Taiwan.                                  | Lin CH et al.       | 24433515 | Not a renal disease focus |
| 7  | 1 | VHL and HIF-1 $\hat{\pm}$ : gene variations and prognosis in early-stage clear cell renal cell carcinoma.                                                                      | Lessi F et al.      | 24446253 | Not a renal disease focus |
| 8  | 1 | Genomic architecture and evolution of clear cell renal cell carcinomas defined by multiregion sequencing.                                                                      | Gerlinger M et al.  | 24487277 | Not a renal disease focus |
| 9  | 1 | IFT27, encoding a small GTPase component of IFT particles, is mutated in a consanguineous family with Bardet-Biedl syndrome.                                                   | Aldahmesh MA et al. | 24488770 | Not a renal disease focus |
| 10 | 1 | TNFAIP3 gene polymorphisms associated with differential susceptibility to rheumatoid arthritis and systemic lupus erythematosus in the Korean population.                      | Kim SK et al.       | 24489017 | Not a renal disease focus |
| 11 | 1 | HER2 protein overexpression and gene amplification in upper urinary tract urothelial carcinoma-an analysis of 171 patients.                                                    | Sasaki Y et al.     | 24551292 | Not a renal disease focus |
| 12 | 1 | Genotype-phenotype correlations, and retinal function and structure in von Hippel-Lindau disease.                                                                              | Wittstrom E et al.  | 24555745 | Not a renal disease focus |
| 13 | 1 | Higher thrombin activatable fibrinolysis inhibitor levels are associated with inflammation in attack-free familial Mediterranean fever patients.                               | Bavbek N et al.     | 24580410 | Not a renal disease focus |
| 14 | 1 | Contribution of CDKAL1 rs7756992 and IGF2BP2 rs4402960 polymorphisms in type 2 diabetes, diabetic complications, obesity risk and hypertension in the Tunisian population.     | Lasram K et al.     | 24636221 | Not a renal disease focus |



|    |   |                                                                                                                                                                                         |                      |          |                           |
|----|---|-----------------------------------------------------------------------------------------------------------------------------------------------------------------------------------------|----------------------|----------|---------------------------|
| 1  | 1 | Testing of potential glycan-based heparanase inhibitors in a fluorescence activity assay using either bacterial heparinase II or human heparanase.                                      | Schoenfeld AK et al. | 24667567 | Not a renal disease focus |
| 2  | 1 | Impact of the common genetic associations of age-related macular degeneration upon systemic complement component C3d levels.                                                            | Ristau T et al.      | 24675670 | Not a renal disease focus |
| 3  | 1 | Lipoprotein (a) concentrations, apolipoprotein (a) phenotypes, and peripheral arterial disease in three independent cohorts.                                                            | Laschkolnig A et al. | 24760552 | Not a renal disease focus |
| 4  | 1 | TMPRSS6 rs855791 polymorphism influences the susceptibility to iron deficiency anemia in women at reproductive age.                                                                     | Pei SN et al.        | 24782651 | Not a renal disease focus |
| 5  | 1 | Manganese superoxide dismutase (SOD2) polymorphisms, plasma advanced oxidation protein products (AOPP) concentration and risk of kidney complications in subjects with type 1 diabetes. | Mohammedi K et al.   | 24819633 | Not a renal disease focus |
| 6  | 1 | A labor- and cost-effective non-optical semiconductor (Ion Torrent) next-generation sequencing of the SLC12A3 and CLCNKA/B genes in Gitelman's syndrome patients.                       | Tavira B et al.      | 24830959 | Not a renal disease focus |
| 7  | 1 | Genetic polymorphisms of paraoxonase1 192 and glutathione peroxidase1 197 enzymes in familial Mediterranean fever.                                                                      | Oktem F et al.       | 24841661 | Not a renal disease focus |
| 8  | 1 | Common variants of cGKII/PRKG2 are not associated with gout susceptibility.                                                                                                             | Sakiyama M et al.    | 24882840 | Not a renal disease focus |
| 9  | 1 | Bobby Sox homology regulates odontoblast differentiation of human dental pulp stem cells/progenitors.                                                                                   | Choi YA et al.       | 24885382 | Not a renal disease focus |
| 10 | 1 | A complement factor B mutation in a large kindred with atypical hemolytic uremic syndrome.                                                                                              | Funato M et al.      | 24906628 | Not a renal disease focus |
| 11 | 1 | Recurrent somatic mutation in DROSHA induces microRNA profile changes in Wilms tumour.                                                                                                  | Torrezan GT et al.   | 24909261 | Not a renal disease focus |
| 12 | 1 | Breast cancer risk, nightwork, and circadian clock gene polymorphisms.                                                                                                                  | Truong T et al.      | 24919398 | Not a renal disease focus |
| 13 | 1 | The role of endothelial nitric oxide synthase gene G894T and intron 4 VNTR polymorphisms in hemodialysis patients with vascular access thrombosis.                                      | Sener EF et al.      | 24936541 | Not a renal disease focus |
| 14 | 1 | The consensus-based approach for gene/enzyme replacement therapies and crystallization strategies: the case of human alanine-glyoxylate aminotransferase.                               | Mesa-Torres N et al. | 24957194 | Not a renal disease focus |

|    |                                                                                                                                                                        |                   |          |                           |
|----|------------------------------------------------------------------------------------------------------------------------------------------------------------------------|-------------------|----------|---------------------------|
| 1  | Polymorphisms in genes of the renin-angiotensin-aldosterone system and renal cell cancer risk: interplay with hypertension and intakes of sodium, potassium and fluid. | Deckers IA et al. | 24978482 | Not a renal disease focus |
| 2  |                                                                                                                                                                        |                   |          |                           |
| 3  |                                                                                                                                                                        |                   |          |                           |
| 4  |                                                                                                                                                                        |                   |          |                           |
| 5  |                                                                                                                                                                        |                   |          |                           |
| 6  |                                                                                                                                                                        |                   |          |                           |
| 7  |                                                                                                                                                                        |                   |          |                           |
| 8  |                                                                                                                                                                        |                   |          |                           |
| 9  |                                                                                                                                                                        |                   |          |                           |
| 10 |                                                                                                                                                                        |                   |          |                           |
| 11 |                                                                                                                                                                        |                   |          |                           |
| 12 |                                                                                                                                                                        |                   |          |                           |
| 13 |                                                                                                                                                                        |                   |          |                           |
| 14 |                                                                                                                                                                        |                   |          |                           |
| 15 |                                                                                                                                                                        |                   |          |                           |
| 16 |                                                                                                                                                                        |                   |          |                           |
| 17 |                                                                                                                                                                        |                   |          |                           |
| 18 |                                                                                                                                                                        |                   |          |                           |
| 19 |                                                                                                                                                                        |                   |          |                           |
| 20 |                                                                                                                                                                        |                   |          |                           |
| 21 |                                                                                                                                                                        |                   |          |                           |
| 22 |                                                                                                                                                                        |                   |          |                           |
| 23 |                                                                                                                                                                        |                   |          |                           |
| 24 |                                                                                                                                                                        |                   |          |                           |
| 25 |                                                                                                                                                                        |                   |          |                           |
| 26 |                                                                                                                                                                        |                   |          |                           |
| 27 |                                                                                                                                                                        |                   |          |                           |
| 28 |                                                                                                                                                                        |                   |          |                           |
| 29 |                                                                                                                                                                        |                   |          |                           |
| 30 |                                                                                                                                                                        |                   |          |                           |
| 31 |                                                                                                                                                                        |                   |          |                           |
| 32 |                                                                                                                                                                        |                   |          |                           |
| 33 |                                                                                                                                                                        |                   |          |                           |
| 34 |                                                                                                                                                                        |                   |          |                           |
| 35 |                                                                                                                                                                        |                   |          |                           |
| 36 |                                                                                                                                                                        |                   |          |                           |
| 37 |                                                                                                                                                                        |                   |          |                           |
| 38 |                                                                                                                                                                        |                   |          |                           |
| 39 |                                                                                                                                                                        |                   |          |                           |
| 40 |                                                                                                                                                                        |                   |          |                           |
| 41 |                                                                                                                                                                        |                   |          |                           |
| 42 |                                                                                                                                                                        |                   |          |                           |
| 43 |                                                                                                                                                                        |                   |          |                           |
| 44 |                                                                                                                                                                        |                   |          |                           |
| 45 |                                                                                                                                                                        |                   |          |                           |
| 46 |                                                                                                                                                                        |                   |          |                           |

|    |   |                                                                                                                                                 |                     |          |                           |
|----|---|-------------------------------------------------------------------------------------------------------------------------------------------------|---------------------|----------|---------------------------|
| 1  | 1 | Variants in angiogenesis-related genes and the risk of clear cell renal cell carcinoma.                                                         | Qin C et al.        | 25239121 | Not a renal disease focus |
| 2  | 1 | PYGM expression analysis in white blood cells: a complementary tool for diagnosing McArdle disease?                                             | de Luna N et al.    | 25240406 | Not a renal disease focus |
| 3  | 1 | LRRK2 G2385R and R1628P mutations are associated with an increased risk of Parkinson's disease in the Malaysian population.                     | Gopalai AA et al.   | 25243190 | Not a renal disease focus |
| 4  | 1 | Gender differences in impact of CYP2C19 polymorphism on development of coronary artery disease.                                                 | Hokimoto S et al.   | 25264752 | Not a renal disease focus |
| 5  | 1 | Genotype and phenotype frequencies of paraoxonase 1 in fertile and infertile men.                                                               | Tavilani H et al.   | 25264968 | Not a renal disease focus |
| 6  | 1 | Phase 1 trial of tivantinib in combination with sorafenib in adult patients with advanced solid tumors.                                         | Puzanov I et al.    | 25294187 | Not a renal disease focus |
| 7  | 1 | G-protein receptor kinase 4 polymorphism and response to antihypertensive therapy.                                                              | Muskalla AM et al.  | 25301854 | Not a renal disease focus |
| 8  | 1 | Downregulation of NDUFB6 due to 9p24.1-p13.3 loss is implicated in metastatic clear cell renal cell carcinoma.                                  | Narimatsu T et al.  | 25315157 | Not a renal disease focus |
| 9  | 1 | Association of polymorphisms of angiotensin I converting enzyme 2 with retinopathy in type 2 diabetes mellitus among Chinese individuals        | Meng N et al.       | 25359286 | Not a renal disease focus |
| 10 | 1 | Matrix metalloproteinase 9 polymorphisms and systemic lupus erythematosus: correlation with systemic inflammatory markers and oxidative stress. | Bahremand F et al.  | 25416694 | Not a renal disease focus |
| 11 | 1 | Rhabdoid tumor predisposition syndrome.                                                                                                         | Sredni ST et al.    | 25494491 | Not a renal disease focus |
| 12 | 1 | Autosomal recessive lissencephaly with cerebellar hypoplasia is associated with a loss-of-function mutation in CDK5.                            | Magen D et al.      | 25560765 | Not a renal disease focus |
| 13 | 1 | Exome-wide Sequencing Shows Low Mutation Rates and Identifies Novel Mutated Genes in Seminomas.                                                 | Cutcutache I et al. | 25597018 | Not a renal disease focus |
| 14 | 1 | Molecular and immunohistochemical characterization reveals novel BRAF mutations in metanephric adenoma.                                         | Udager AM et al.    | 25602792 | Not a renal disease focus |
| 15 | 1 | Genome-wide association study of clinically defined gout identifies multiple risk loci and its association with clinical subtypes.              | Matsuo H et al.     | 25646370 | Not a renal disease focus |

|    |                                                                                                                                                                   |                                                                                                                                                                     |                      |                           |                           |
|----|-------------------------------------------------------------------------------------------------------------------------------------------------------------------|---------------------------------------------------------------------------------------------------------------------------------------------------------------------|----------------------|---------------------------|---------------------------|
| 1  | The role of hOGG1 C1245G polymorphism in the susceptibility to lupus nephritis and modulation of the plasma 8-OHdG in patients with systemic lupus erythematosus. | Lee HT et al.                                                                                                                                                       | 25671815             | Not a renal disease focus |                           |
| 2  |                                                                                                                                                                   |                                                                                                                                                                     |                      |                           |                           |
| 3  |                                                                                                                                                                   |                                                                                                                                                                     |                      |                           |                           |
| 4  |                                                                                                                                                                   |                                                                                                                                                                     |                      |                           |                           |
| 5  |                                                                                                                                                                   |                                                                                                                                                                     |                      |                           |                           |
| 6  | 1                                                                                                                                                                 | Endothelial nitric oxide synthase gene intron 4 variable number tandem repeat polymorphism in $\beta$ -thalassemia major: relation to cardiovascular complications. | Tantawy AA et al.    | 25699607                  | Not a renal disease focus |
| 7  |                                                                                                                                                                   |                                                                                                                                                                     |                      |                           |                           |
| 8  |                                                                                                                                                                   |                                                                                                                                                                     |                      |                           |                           |
| 9  | 1                                                                                                                                                                 | Genetic variants in five novel loci including CFB and CD40 predispose to chronic hepatitis B.                                                                       | Jiang DK et al.      | 25802187                  | Not a renal disease focus |
| 10 |                                                                                                                                                                   |                                                                                                                                                                     |                      |                           |                           |
| 11 |                                                                                                                                                                   |                                                                                                                                                                     |                      |                           |                           |
| 12 | 1                                                                                                                                                                 | SNP Variants in RET and PAX2 and Their Possible Contribution to the Primary Hyperoxaluria Type 1 Phenotype.                                                         | Coulter-Mackie MB    | 25854853                  | Not a renal disease focus |
| 13 |                                                                                                                                                                   |                                                                                                                                                                     |                      |                           |                           |
| 14 | 1                                                                                                                                                                 | Polymorphic differences in the SOD-2 gene may affect the pathogenesis of nephropathy in patients with diabetes and diabetic complications.                          | Houldsworth A et al. | 25858271                  | Not a renal disease focus |
| 15 |                                                                                                                                                                   |                                                                                                                                                                     |                      |                           |                           |
| 16 | 1                                                                                                                                                                 | Retrospective analysis of FFPE based Wilms' Tumor samples through copy number and somatic mutation related Molecular Inversion Probe Based Array.                   | Singh N et al.       | 25913740                  | Not a renal disease focus |
| 17 |                                                                                                                                                                   |                                                                                                                                                                     |                      |                           |                           |
| 18 | 1                                                                                                                                                                 | Genotype-phenotype analysis of von Hippel-Lindau syndrome in fifteen Indian families.                                                                               | Vikkath N et al.     | 25952756                  | Not a renal disease focus |
| 19 |                                                                                                                                                                   |                                                                                                                                                                     |                      |                           |                           |
| 20 | 1                                                                                                                                                                 | Angiotensin-converting enzyme (ACE) gene insertion/deletion polymorphism is not a risk factor for hypertension in SLE nephritis.                                    | Negi VS et al.       | 25957879                  | Not a renal disease focus |
| 21 |                                                                                                                                                                   |                                                                                                                                                                     |                      |                           |                           |
| 22 | 1                                                                                                                                                                 | A novel phenotype in N-glycosylation disorders: Gillessen-Kaesbach-Nishimura skeletal dysplasia due to pathogenic variants in ALG9.                                 | Tham E et al.        | 25966638                  | Not a renal disease focus |
| 23 |                                                                                                                                                                   |                                                                                                                                                                     |                      |                           |                           |
| 24 | 1                                                                                                                                                                 | Loss of BAP1 Expression in Basal Cell Carcinomas in Patients With Germline BAP1 Mutations.                                                                          | Mochel MC et al.     | 25972334                  | Not a renal disease focus |
| 25 |                                                                                                                                                                   |                                                                                                                                                                     |                      |                           |                           |
| 26 | 1                                                                                                                                                                 | Spectrum of mutations in the ATP binding domain of ATP7B gene of Wilson Disease in a regional Indian cohort.                                                        | Guggilla SR et al.   | 25982861                  | Not a renal disease focus |
| 27 |                                                                                                                                                                   |                                                                                                                                                                     |                      |                           |                           |
| 28 | 1                                                                                                                                                                 | Prevalence of Mycobacterium avium subsp. paratuberculosis and Escherichia coli in blood samples from patients with inflammatory bowel disease.                      | Nazareth N et al.    | 25994082                  | Not a renal disease focus |
| 29 |                                                                                                                                                                   |                                                                                                                                                                     |                      |                           |                           |
| 30 | 1                                                                                                                                                                 | Matrix metalloproteinase-2 (MMP-2) gene polymorphism and cardiovascular comorbidity in type 2 diabetes patients.                                                    | Buraczynska M et al. | 26025700                  | Not a renal disease focus |
| 31 |                                                                                                                                                                   |                                                                                                                                                                     |                      |                           |                           |
| 32 | 1                                                                                                                                                                 | Genetic Variants in Caveolin-1 and RhoA/ROCK1 Are Associated with Clear Cell Renal Cell Carcinoma Risk in a Chinese Population.                                     | Zhao R et al.        | 26066055                  | Not a renal disease focus |
| 33 |                                                                                                                                                                   |                                                                                                                                                                     |                      |                           |                           |
| 34 |                                                                                                                                                                   |                                                                                                                                                                     |                      |                           |                           |
| 35 |                                                                                                                                                                   |                                                                                                                                                                     |                      |                           |                           |
| 36 |                                                                                                                                                                   |                                                                                                                                                                     |                      |                           |                           |
| 37 |                                                                                                                                                                   |                                                                                                                                                                     |                      |                           |                           |
| 38 |                                                                                                                                                                   |                                                                                                                                                                     |                      |                           |                           |
| 39 |                                                                                                                                                                   |                                                                                                                                                                     |                      |                           |                           |
| 40 |                                                                                                                                                                   |                                                                                                                                                                     |                      |                           |                           |
| 41 |                                                                                                                                                                   |                                                                                                                                                                     |                      |                           |                           |
| 42 |                                                                                                                                                                   |                                                                                                                                                                     |                      |                           |                           |
| 43 |                                                                                                                                                                   |                                                                                                                                                                     |                      |                           |                           |
| 44 |                                                                                                                                                                   |                                                                                                                                                                     |                      |                           |                           |
| 45 |                                                                                                                                                                   |                                                                                                                                                                     |                      |                           |                           |
| 46 |                                                                                                                                                                   |                                                                                                                                                                     |                      |                           |                           |

|    |   |                                                                                                                                                                   |                         |          |                           |
|----|---|-------------------------------------------------------------------------------------------------------------------------------------------------------------------|-------------------------|----------|---------------------------|
| 1  | 1 | Genetic and Functional Analysis of Polymorphisms in the Human Dopamine Receptor and Transporter Genes in Small Cell Lung Cancer.                                  | Cherubini E et al.      | 26081799 | Not a renal disease focus |
| 2  | 1 | Exploring genotype-phenotype relationships in Bardet-Biedl syndrome families.                                                                                     | Castro-Sanchez S et al. | 26082521 | Not a renal disease focus |
| 3  | 1 | Whole Exome Sequencing Reveals Novel PHEX Splice Site Mutations in Patients with Hypophosphatemic Rickets.                                                        | Ma SL et al.            | 26107949 | Not a renal disease focus |
| 4  | 1 | Exome sequencing in seven families and gene-based association studies indicate genetic heterogeneity and suggest possible candidates for fibromuscular dysplasia. | Kiando SR et al.        | 26147384 | Not a renal disease focus |
| 5  | 1 | TERT Promoter Mutations in Papillary Thyroid Microcarcinomas.                                                                                                     | de Biase D et al.       | 26148423 | Not a renal disease focus |
| 6  | 1 | A genome-wide screening and SNPs-to-genes approach to identify novel genetic risk factors associated with frontotemporal dementia.                                | Ferrari R et al.        | 26154020 | Not a renal disease focus |
| 7  | 1 | GSTM1, GSTT1 and GSTP1 Genetic Variants in Multiple Urologic Cancers.                                                                                             | Chirila DN et al.       | 26158735 | Not a renal disease focus |
| 8  | 1 | Renal cell carcinoma risk is associated with the interactions of APOE, VHL and MTHFR gene polymorphisms.                                                          | Lv C et al.             | 26191297 | Not a renal disease focus |
| 9  | 1 | Financial incentives for kidney donation: A comparative case study using synthetic controls.                                                                      | Bilgel F et al.         | 26218985 | Not a renal disease focus |
| 10 | 1 | Novel mutations of the ATP7B gene in Han Chinese families with pre-symptomatic Wilson's disease.                                                                  | Yuan ZF et al.          | 26253413 | Not a renal disease focus |
| 11 | 1 | Lack of genetic association of the TGM2 gene with schizophrenia in a Chinese population.                                                                          | Wang J et al.           | 26307914 | Not a renal disease focus |
| 12 | 1 | Genetic Polymorphism of MMP2 Gene and Susceptibility to Prostate Cancer.                                                                                          | Adabi Z et al.          | 26319608 | Not a renal disease focus |
| 13 | 1 | A method for predicting target drug efficiency in cancer based on the analysis of signaling pathway activation.                                                   | Artemov A et al.        | 26320181 | Not a renal disease focus |
| 14 | 1 | Effect of a functional polymorphism in the pre-miR-146a gene on the risk and prognosis of renal cell carcinoma.                                                   | Huang Z et al.          | 26323945 | Not a renal disease focus |
| 15 | 1 | The sirtuin inhibitor sirtinol inhibits hepatitis A virus (HAV) replication by inhibiting HAV internal ribosomal entry site activity.                             | Kanda T et al.          | 26388050 | Not a renal disease focus |

|    |                                                                                                                                                                                     |                       |          |                           |
|----|-------------------------------------------------------------------------------------------------------------------------------------------------------------------------------------|-----------------------|----------|---------------------------|
| 1  | Molecular characterization of multidrug-resistant <i>Klebsiella pneumoniae</i> isolates.                                                                                            | Hou XH et al.         | 26413058 | Not a renal disease focus |
| 2  |                                                                                                                                                                                     |                       |          |                           |
| 3  |                                                                                                                                                                                     |                       |          |                           |
| 4  |                                                                                                                                                                                     |                       |          |                           |
| 5  |                                                                                                                                                                                     |                       |          |                           |
| 6  | 1 Variants in Vitamin D Binding Protein Gene Are Associated With Gestational Diabetes Mellitus.                                                                                     | Wang Y et al.         | 26448018 | Not a renal disease focus |
| 7  |                                                                                                                                                                                     |                       |          |                           |
| 8  |                                                                                                                                                                                     |                       |          |                           |
| 9  | 1 Role of PTPN22 and CSK gene polymorphisms as predictors of susceptibility and clinical heterogeneity in patients with Henoch-Schönlein purpura (IgA vasculitis).                  | Lopez-Mejias R et al. | 26458874 | Not a renal disease focus |
| 10 |                                                                                                                                                                                     |                       |          |                           |
| 11 |                                                                                                                                                                                     |                       |          |                           |
| 12 | 1 Association of polymorphisms in PRKCI gene and risk of prostate cancer in a sample of Iranian Population.                                                                         | Hashemi M et al.      | 26475383 | Not a renal disease focus |
| 13 |                                                                                                                                                                                     |                       |          |                           |
| 14 |                                                                                                                                                                                     |                       |          |                           |
| 15 | 1 Analysis of Multiple Families With Single Individuals Affected by Pseudohypoparathyroidism Type 1b (PHP1B) Reveals Only One Novel Maternally Inherited GNAS Deletion.             | Takatani R et al.     | 26479409 | Not a renal disease focus |
| 16 |                                                                                                                                                                                     |                       |          |                           |
| 17 |                                                                                                                                                                                     |                       |          |                           |
| 18 | 1 Constitutional de novo deletion of the FBXW7 gene in a patient with focal segmental glomerulosclerosis and multiple primitive tumors.                                             | Roversi G et al.      | 26482194 | Not a renal disease focus |
| 19 |                                                                                                                                                                                     |                       |          |                           |
| 20 |                                                                                                                                                                                     |                       |          |                           |
| 21 | 1 MKS1 regulates ciliary INPP5E levels in Joubert syndrome.                                                                                                                         | Slaats GG et al.      | 26490104 | Not a renal disease focus |
| 22 |                                                                                                                                                                                     |                       |          |                           |
| 23 |                                                                                                                                                                                     |                       |          |                           |
| 24 | 1 Association of Angiotensin Converting Enzyme Insertion-Deletion Polymorphism with Hypertension in Emiratis with Type 2 Diabetes Mellitus and Its Interaction with Obesity Status. | Alsafar H et al.      | 26491214 | Not a renal disease focus |
| 25 |                                                                                                                                                                                     |                       |          |                           |
| 26 | 1 Association of chitotriosidase enzyme activity and genotype with the risk of nephropathy in type 2 diabetes.                                                                      | Elmonem MA et al.     | 26589000 | Not a renal disease focus |
| 27 |                                                                                                                                                                                     |                       |          |                           |
| 28 |                                                                                                                                                                                     |                       |          |                           |
| 29 | 1 Use of a High-Density Protein Microarray to Identify Autoantibodies in Subjects with Type 2 Diabetes Mellitus and an HLA Background Associated with Reduced Insulin Secretion.    | Chang DC et al.       | 26606528 | Not a renal disease focus |
| 30 |                                                                                                                                                                                     |                       |          |                           |
| 31 |                                                                                                                                                                                     |                       |          |                           |
| 32 | 1 Analysis of urinary cathepsin C for diagnosing Papillon-Lefèvre syndrome.                                                                                                         | Hamon Y et al.        | 26607765 | Not a renal disease focus |
| 33 |                                                                                                                                                                                     |                       |          |                           |
| 34 | 1 Genetic alteration in notch pathway is associated with better prognosis in renal cell carcinoma.                                                                                  | Feng C et al.         | 26662507 | Not a renal disease focus |
| 35 |                                                                                                                                                                                     |                       |          |                           |
| 36 | 1 Genotype-guided tacrolimus dosing in African-American kidney transplant recipients.                                                                                               | Sanghavi K et al.     | 26667830 | Not a renal disease focus |
| 37 |                                                                                                                                                                                     |                       |          |                           |
| 38 | 1 Hepatocystin is Essential for TRPM7 Function During Early Embryogenesis.                                                                                                          | Overton JD et al.     | 26671672 | Not a renal disease focus |
| 39 |                                                                                                                                                                                     |                       |          |                           |
| 40 |                                                                                                                                                                                     |                       |          |                           |
| 41 |                                                                                                                                                                                     |                       |          |                           |
| 42 |                                                                                                                                                                                     |                       |          |                           |
| 43 |                                                                                                                                                                                     |                       |          |                           |
| 44 |                                                                                                                                                                                     |                       |          |                           |
| 45 |                                                                                                                                                                                     |                       |          |                           |
| 46 |                                                                                                                                                                                     |                       |          |                           |

|    |   |                                                                                                                                                                  |                     |          |                           |
|----|---|------------------------------------------------------------------------------------------------------------------------------------------------------------------|---------------------|----------|---------------------------|
| 1  | 1 | XRCC3 Thr241Met and XPD Lys751Gln gene polymorphisms and risk of clear cell renal cell carcinoma.                                                                | Loghin A et al.     | 26682510 | Not a renal disease focus |
| 2  | 1 | Germline BAP1 Mutational Landscape of Asbestos-Exposed Malignant Mesothelioma Patients with Family History of Cancer.                                            | Ohar JA et al.      | 26719535 | Not a renal disease focus |
| 3  | 1 | HABP2 G534E Variant in Papillary Thyroid Carcinoma.                                                                                                              | Tomsic J et al.     | 26745718 | Not a renal disease focus |
| 4  | 1 | Glutathione peroxidase-1 gene (GPX1) variants, oxidative stress and risk of kidney complications in people with type 1 diabetes.                                 | Mohammedi K et al.  | 26773925 | Not a renal disease focus |
| 5  | 1 | Serum paraoxonase-1 gene polymorphism and enzyme activity in patients with urolithiasis.                                                                         | Atar A et al.       | 26795139 | Not a renal disease focus |
| 6  | 1 | Association of ACE gene D polymorphism with left ventricular hypertrophy in patients with diastolic heart failure: a case-control study.                         | Bahramali E et al.  | 26861937 | Not a renal disease focus |
| 7  | 1 | Association of the BsmI, ApaI, TaqI, Tru9I and FokI Polymorphisms of the Vitamin D Receptor Gene with Nephrolithiasis in the Turkish Population.                 | Cakir OO et al.     | 26945655 | Not a renal disease focus |
| 8  | 1 | System-Wide Modulation of HECT E3 Ligases with Selective Ubiquitin Variant Probes.                                                                               | Zhang W et al.      | 26949039 | Not a renal disease focus |
| 9  | 1 | Spondyloenchondrodysplasia Due to Mutations in ACP5: A Comprehensive Survey.                                                                                     | Briggs TA et al.    | 26951490 | Not a renal disease focus |
| 10 | 1 | Novel NEK8 Mutations Cause Severe Syndromic Renal Cystic Dysplasia through YAP Dysregulation.                                                                    | Grampa V et al.     | 26967905 | Not a renal disease focus |
| 11 | 1 | Angiotensin-converting enzyme gene I/D polymorphism increases the susceptibility to hypertension and additive diseases: A study on North Indian patients.        | Singh M et al.      | 27030424 | Not a renal disease focus |
| 12 | 1 | Cystinosis deficiency causes podocyte damage and loss associated with increased cell motility.                                                                   | Ivanova EA et al.   | 27083281 | Not a renal disease focus |
| 13 | 1 | The VHL short variant involves in protein quality control.                                                                                                       | Liu Y et al.        | 27196060 | Not a renal disease focus |
| 14 | 1 | Vascular endothelial growth factor polymorphism (-460 T/C) is related to hypertension-associated chronic kidney disease.                                         | Malkiewicz A et al. | 27367286 | Not a renal disease focus |
| 15 | 1 | The association between fructosamine-3 kinase 900C/G polymorphism, transferrin polymorphism and human herpesvirus-8 infection in diabetics living in South Kivu. | Cikomola JC et al.  | 27461879 | Not a renal disease focus |



|    |                                                                                                                                                                      |                      |          |                           |
|----|----------------------------------------------------------------------------------------------------------------------------------------------------------------------|----------------------|----------|---------------------------|
| 1  | Pro198Leu Polymorphism in the Glutathione Peroxidase 1 Gene Contributes to Diabetic Peripheral Neuropathy in Type 2 Diabetes Patients.                               | Buraczynska M et al. | 27592002 | Not a renal disease focus |
| 2  |                                                                                                                                                                      |                      |          |                           |
| 3  |                                                                                                                                                                      |                      |          |                           |
| 4  |                                                                                                                                                                      |                      |          |                           |
| 5  |                                                                                                                                                                      |                      |          |                           |
| 6  |                                                                                                                                                                      |                      |          |                           |
| 7  | ERBB4 gene polymorphisms and the risk of prostate cancer in a sample of Iranian Population.                                                                          | Hashemi M et al.     | 27609473 | Not a renal disease focus |
| 8  |                                                                                                                                                                      |                      |          |                           |
| 9  | VEGF-A and VEGFR1 SNPs associate with preeclampsia in a Philippine population.                                                                                       | Amosco MD et al.     | 27668980 | Not a renal disease focus |
| 10 |                                                                                                                                                                      |                      |          |                           |
| 11 | Assessment of Human Tribbles Homolog 3 Genetic Variation (rs2295490) Effects on Type 2 Diabetes Patients with Glucose Control and Blood Pressure Lowering Treatment. | He F et al.          | 27793583 | Not a renal disease focus |
| 12 |                                                                                                                                                                      |                      |          |                           |
| 13 | TET2 binds the androgen receptor and loss is associated with prostate cancer.                                                                                        | Nickerson ML et al.  | 27819678 | Not a renal disease focus |
| 14 |                                                                                                                                                                      |                      |          |                           |
| 15 | PCSK9 genetic variants and risk of type 2 diabetes: a mendelian randomisation study.                                                                                 | Schmidt AF et al.    | 27908689 | Not a renal disease focus |
| 16 |                                                                                                                                                                      |                      |          |                           |
| 17 | Hypertension is a characteristic complication of X-linked hypophosphatemia.                                                                                          | Nakamura Y et al.    | 28025445 | Not a renal disease focus |
| 18 |                                                                                                                                                                      |                      |          |                           |
| 19 | URAT1 inhibition by ALPK1 is associated with uric acid homeostasis.                                                                                                  | Kuo TM et al.        | 28039413 | Not a renal disease focus |
| 20 |                                                                                                                                                                      |                      |          |                           |
| 21 | Autophagy-related gene LRRK2 is likely a susceptibility gene for systemic lupus erythematosus in northern Han Chinese.                                               | Zhang YM et al.      | 28099919 | Not a renal disease focus |
| 22 |                                                                                                                                                                      |                      |          |                           |
| 23 | Association Study of Klotho Gene Polymorphism With Calcium Oxalate Stones in The Uyghur Population of Xinjiang, China.                                               | Ali A et al.         | 28116736 | Not a renal disease focus |
| 24 |                                                                                                                                                                      |                      |          |                           |
| 25 | Rare and low-frequency coding variants alter human adult height.                                                                                                     | Marouli E et al.     | 28146470 | Not a renal disease focus |
| 26 |                                                                                                                                                                      |                      |          |                           |
| 27 | An association between overexpression of DNA methyltransferase 3B4 and clear cell renal cell carcinoma.                                                              | Liu Y et al.         | 28160561 | Not a renal disease focus |
| 28 |                                                                                                                                                                      |                      |          |                           |
| 29 | BARD1 Gene Polymorphisms Confer Nephroblastoma Susceptibility.                                                                                                       | Fu W et al.          | 28161399 | Not a renal disease focus |
| 30 |                                                                                                                                                                      |                      |          |                           |
| 31 | Genetic susceptibility variants for lung cancer: replication study and assessment as expression quantitative trait loci.                                             | Pintarelli G et al.  | 28181565 | Not a renal disease focus |
| 32 |                                                                                                                                                                      |                      |          |                           |
| 33 | Relationship between salivary/pancreatic amylase and body mass index: a systems biology approach.                                                                    | Bonnefond A et al.   | 28228143 | Not a renal disease focus |
| 34 |                                                                                                                                                                      |                      |          |                           |
| 35 |                                                                                                                                                                      |                      |          |                           |
| 36 |                                                                                                                                                                      |                      |          |                           |
| 37 |                                                                                                                                                                      |                      |          |                           |
| 38 |                                                                                                                                                                      |                      |          |                           |
| 39 |                                                                                                                                                                      |                      |          |                           |
| 40 |                                                                                                                                                                      |                      |          |                           |
| 41 |                                                                                                                                                                      |                      |          |                           |
| 42 |                                                                                                                                                                      |                      |          |                           |
| 43 |                                                                                                                                                                      |                      |          |                           |
| 44 |                                                                                                                                                                      |                      |          |                           |
| 45 |                                                                                                                                                                      |                      |          |                           |
| 46 |                                                                                                                                                                      |                      |          |                           |



|    |                                                                                                                      |                                                                                                                                                                              |                      |                           |                           |
|----|----------------------------------------------------------------------------------------------------------------------|------------------------------------------------------------------------------------------------------------------------------------------------------------------------------|----------------------|---------------------------|---------------------------|
| 1  | Development of hypomelanotic macules is associated with constitutive activated mTORC1 in tuberous sclerosis complex. | Moller LB et al.                                                                                                                                                             | 28336152             | Not a renal disease focus |                           |
| 2  |                                                                                                                      |                                                                                                                                                                              |                      |                           |                           |
| 3  |                                                                                                                      |                                                                                                                                                                              |                      |                           |                           |
| 4  | 1                                                                                                                    | A Low-Frequency Inactivating AKT2 Variant Enriched in the Finnish Population Is Associated With Fasting Insulin Levels and Type 2 Diabetes Risk.                             | Manning A et al.     | 28341696                  | Not a renal disease focus |
| 5  |                                                                                                                      |                                                                                                                                                                              |                      |                           |                           |
| 6  | 1                                                                                                                    | Cost-effectiveness Analysis for Genotyping before Allopurinol Treatment to Prevent Severe Cutaneous Adverse Drug Reactions.                                                  | Ke CH et al.         | 28365572                  | Not a renal disease focus |
| 7  |                                                                                                                      |                                                                                                                                                                              |                      |                           |                           |
| 8  | 1                                                                                                                    | Hepatitis C viral load, genotype, and increased risk of developing end-stage renal disease: REVEAL-HCV study.                                                                | Lai TS et al.        | 28370058                  | Not a renal disease focus |
| 9  |                                                                                                                      |                                                                                                                                                                              |                      |                           |                           |
| 10 | 1                                                                                                                    | Isolated polycystic liver disease genes define effectors of polycystin-1 function.                                                                                           | Besse W et al.       | 28375157                  | Not a renal disease focus |
| 11 |                                                                                                                      |                                                                                                                                                                              |                      |                           |                           |
| 12 | 1                                                                                                                    | Role of MMP-7 in the pathogenesis of systemic lupus erythematosus (SLE).                                                                                                     | Vira H et al.        | 28420044                  | Not a renal disease focus |
| 13 |                                                                                                                      |                                                                                                                                                                              |                      |                           |                           |
| 14 | 1                                                                                                                    | Frequent somatic mutations in epigenetic regulators in newly diagnosed chronic myeloid leukemia.                                                                             | Togasaki E et al.    | 28452984                  | Not a renal disease focus |
| 15 |                                                                                                                      |                                                                                                                                                                              |                      |                           |                           |
| 16 | 1                                                                                                                    | Ocular Pathology of Oculocerebrorenal Syndrome of Lowe: Novel Mutations and Genotype-Phenotype Analysis.                                                                     | Song E et al.        | 28473699                  | Not a renal disease focus |
| 17 |                                                                                                                      |                                                                                                                                                                              |                      |                           |                           |
| 18 | 1                                                                                                                    | A novel, de novo mutation in the PRKAG2 gene: infantile-onset phenotype and the signaling pathway involved.                                                                  | Xu Y et al.          | 28550180                  | Not a renal disease focus |
| 19 |                                                                                                                      |                                                                                                                                                                              |                      |                           |                           |
| 20 | 1                                                                                                                    | Genome-wide association study of erythrocyte density in sickle cell disease patients.                                                                                        | Ilboudo Y et al.     | 28552477                  | Not a renal disease focus |
| 21 |                                                                                                                      |                                                                                                                                                                              |                      |                           |                           |
| 22 | 1                                                                                                                    | Functional polymorphism at the miR-502-binding site in the 3' untranslated region of the SETD8 gene increased the risk of prostate cancer in a sample of Iranian population. | Narouie B et al.     | 28578017                  | Not a renal disease focus |
| 23 |                                                                                                                      |                                                                                                                                                                              |                      |                           |                           |
| 24 | 1                                                                                                                    | Acute lymphoblastic leukemia and genetic variations in BHMT gene: Case-control study and computational characterization.                                                     | Bellampalli R et al. | 28582843                  | Not a renal disease focus |
| 25 |                                                                                                                      |                                                                                                                                                                              |                      |                           |                           |
| 26 | 1                                                                                                                    | Unusual clinical outcome of primary Hyperoxaluria type 1 in Tunisian patients carrying 33_34InsC mutation.                                                                   | Mbarek IB et al.     | 28619084                  | Not a renal disease focus |
| 27 |                                                                                                                      |                                                                                                                                                                              |                      |                           |                           |
| 28 | 1                                                                                                                    | Disease-linked mutations in factor H reveal pivotal role of cofactor activity in self-surface-selective regulation of complement activation.                                 | Kerr H et al.        | 28637873                  | Not a renal disease focus |
| 29 |                                                                                                                      |                                                                                                                                                                              |                      |                           |                           |
| 30 | 1                                                                                                                    | Glomerular Hyperfiltration in Obese African American Hypertensive Patients Is Associated With Elevated Urinary Mitochondrial-DNA Copy Number.                                | Eirin A et al.       | 28641368                  | Not a renal disease focus |
| 31 |                                                                                                                      |                                                                                                                                                                              |                      |                           |                           |
| 32 |                                                                                                                      |                                                                                                                                                                              |                      |                           |                           |
| 33 |                                                                                                                      |                                                                                                                                                                              |                      |                           |                           |
| 34 |                                                                                                                      |                                                                                                                                                                              |                      |                           |                           |
| 35 |                                                                                                                      |                                                                                                                                                                              |                      |                           |                           |
| 36 |                                                                                                                      |                                                                                                                                                                              |                      |                           |                           |
| 37 |                                                                                                                      |                                                                                                                                                                              |                      |                           |                           |
| 38 |                                                                                                                      |                                                                                                                                                                              |                      |                           |                           |
| 39 |                                                                                                                      |                                                                                                                                                                              |                      |                           |                           |
| 40 |                                                                                                                      |                                                                                                                                                                              |                      |                           |                           |
| 41 |                                                                                                                      |                                                                                                                                                                              |                      |                           |                           |
| 42 |                                                                                                                      |                                                                                                                                                                              |                      |                           |                           |
| 43 |                                                                                                                      |                                                                                                                                                                              |                      |                           |                           |
| 44 |                                                                                                                      |                                                                                                                                                                              |                      |                           |                           |
| 45 |                                                                                                                      |                                                                                                                                                                              |                      |                           |                           |
| 46 |                                                                                                                      |                                                                                                                                                                              |                      |                           |                           |

|    |                                                                                                                                                                                         |                         |          |                           |
|----|-----------------------------------------------------------------------------------------------------------------------------------------------------------------------------------------|-------------------------|----------|---------------------------|
| 1  | Expression and secretion of the Giardia duodenalis variant surface protein 9B10A by transfected trophozoites causes damage to epithelial cell monolayers mediated by protease activity. | Cabrera-Licona A et al. | 28668253 | Not a renal disease focus |
| 2  |                                                                                                                                                                                         |                         |          |                           |
| 3  |                                                                                                                                                                                         |                         |          |                           |
| 4  |                                                                                                                                                                                         |                         |          |                           |
| 5  |                                                                                                                                                                                         |                         |          |                           |
| 6  |                                                                                                                                                                                         |                         |          |                           |
| 7  | Identification of sequence polymorphisms in the mitochondrial cytochrome c oxidase genes as risk factors for hepatocellular carcinoma.                                                  | Wang H et al.           | 28703354 | Not a renal disease focus |
| 8  |                                                                                                                                                                                         |                         |          |                           |
| 9  | Genome-wide association study identifies inversion in the CTRB1-CTRB2 locus to modify risk for alcoholic and non-alcoholic chronic pancreatitis.                                        | Rosendahl J et al.      | 28754779 | Not a renal disease focus |
| 10 |                                                                                                                                                                                         |                         |          |                           |
| 11 | A role of the endothelial nitric oxide system in acute renal colic caused by ureteral stone.                                                                                            | Bulbul E et al.         | 28802544 | Not a renal disease focus |
| 12 |                                                                                                                                                                                         |                         |          |                           |
| 13 | An apical MRCK-driven morphogenetic pathway controls epithelial polarity.                                                                                                               | Zihni C et al.          | 28825699 | Not a renal disease focus |
| 14 |                                                                                                                                                                                         |                         |          |                           |
| 15 | Frequent Genetic Aberrations in the CDK4 Pathway in Acral Melanoma Indicate the Potential for CDK4/6 Inhibitors in Targeted Therapy.                                                    | Kong Y et al.           | 28830923 | Not a renal disease focus |
| 16 |                                                                                                                                                                                         |                         |          |                           |
| 17 | Association between interferon-induced helicase (IFIH1) rs1990760 polymorphism and seasonal variation in the onset of type 1 diabetes mellitus.                                         | Jermendy A et al.       | 28929635 | Not a renal disease focus |
| 18 |                                                                                                                                                                                         |                         |          |                           |
| 19 | AGXT2 rs37369 polymorphism predicts the renal function in patients with chronic heart failure.                                                                                          | Hu XL et al.            | 28942034 | Not a renal disease focus |
| 20 |                                                                                                                                                                                         |                         |          |                           |
| 21 | The Endothelial Nitric Oxide Synthase Gene Polymorphism is Associated with the Susceptibility to Immunoglobulin a Nephropathy in Chinese Population.                                    | Gao J et al.            | 28946141 | Not a renal disease focus |
| 22 |                                                                                                                                                                                         |                         |          |                           |
| 23 | APOL1, CDKN2A/CDKN2B, and HDAC9 polymorphisms and small vessel ischemic stroke.                                                                                                         | Akinyemi R et al.       | 28975602 | Not a renal disease focus |
| 24 |                                                                                                                                                                                         |                         |          |                           |
| 25 | Polymorphisms of DNA repair genes XRCC1 and LIG4 and idiopathic male infertility.                                                                                                       | Ghasemi H et al.        | 28991497 | Not a renal disease focus |
| 26 |                                                                                                                                                                                         |                         |          |                           |
| 27 | Alcohol consumption, variability in alcohol dehydrogenase genes and risk of renal cell carcinoma.                                                                                       | Antwi SO et al.         | 29023769 | Not a renal disease focus |
| 28 |                                                                                                                                                                                         |                         |          |                           |
| 29 | Rare ADAR and RNASEH2B variants and a type I interferon signature in glioma and prostate carcinoma risk and tumorigenesis.                                                              | Beyer U et al.          | 29030706 | Not a renal disease focus |
| 30 |                                                                                                                                                                                         |                         |          |                           |
| 31 | Familial Mediterranean fever mutations are hypermorphic mutations that specifically decrease the activation threshold of the Pyrin inflammasome.                                        | Jamilloux Y et al.      | 29040788 | Not a renal disease focus |
| 32 |                                                                                                                                                                                         |                         |          |                           |
| 33 |                                                                                                                                                                                         |                         |          |                           |
| 34 |                                                                                                                                                                                         |                         |          |                           |
| 35 |                                                                                                                                                                                         |                         |          |                           |
| 36 |                                                                                                                                                                                         |                         |          |                           |
| 37 |                                                                                                                                                                                         |                         |          |                           |
| 38 |                                                                                                                                                                                         |                         |          |                           |
| 39 |                                                                                                                                                                                         |                         |          |                           |
| 40 |                                                                                                                                                                                         |                         |          |                           |
| 41 |                                                                                                                                                                                         |                         |          |                           |
| 42 |                                                                                                                                                                                         |                         |          |                           |
| 43 |                                                                                                                                                                                         |                         |          |                           |
| 44 |                                                                                                                                                                                         |                         |          |                           |
| 45 |                                                                                                                                                                                         |                         |          |                           |
| 46 |                                                                                                                                                                                         |                         |          |                           |

|    |                                                                                                                        |                                                                                                                                         |                    |                           |                           |
|----|------------------------------------------------------------------------------------------------------------------------|-----------------------------------------------------------------------------------------------------------------------------------------|--------------------|---------------------------|---------------------------|
| 1  | Circulating Endothelial Markers in Retinal Vasculopathy With Cerebral Leukoencephalopathy and Systemic Manifestations. | Pelzer N et al.                                                                                                                         | 29114091           | Not a renal disease focus |                           |
| 2  |                                                                                                                        |                                                                                                                                         |                    |                           |                           |
| 3  |                                                                                                                        |                                                                                                                                         |                    |                           |                           |
| 4  | 1                                                                                                                      | Relationship between rs854560 PON1 Gene Polymorphism and Tobacco Smoking with Coronary Artery Disease.                                  | Iwanicka J et al.  | 29118461                  | Not a renal disease focus |
| 5  |                                                                                                                        |                                                                                                                                         |                    |                           |                           |
| 6  | 1                                                                                                                      | Polymorphism of ERCC1 rs3212986 in Chinese Han women with preeclampsia.                                                                 | Liu MC et al.      | 29153678                  | Not a renal disease focus |
| 7  |                                                                                                                        |                                                                                                                                         |                    |                           |                           |
| 8  | 1                                                                                                                      | Analysis of the influence of the T393C polymorphism of the GNAS gene on the clinical expression of primary hyperparathyroidism.         | Piedra M et al.    | 29179855                  | Not a renal disease focus |
| 9  |                                                                                                                        |                                                                                                                                         |                    |                           |                           |
| 10 | 1                                                                                                                      | Association Between Klotho Gene Polymorphism and Markers of Bone Metabolism in Patients Receiving Maintenance Hemodialysis in Iran.     | Nazarian A et al.  | 29190606                  | Not a renal disease focus |
| 11 |                                                                                                                        |                                                                                                                                         |                    |                           |                           |
| 12 | 1                                                                                                                      | Association Between HACE1 Gene Polymorphisms and Wilms' Tumor Risk in a Chinese Population.                                             | Jia W et al.       | 29243987                  | Not a renal disease focus |
| 13 |                                                                                                                        |                                                                                                                                         |                    |                           |                           |
| 14 | 1                                                                                                                      | PDE1A polymorphism contributes to the susceptibility of nephrolithiasis.                                                                | Yang Z et al.      | 29262781                  | Not a renal disease focus |
| 15 |                                                                                                                        |                                                                                                                                         |                    |                           |                           |
| 16 | 1                                                                                                                      | Genetic screening and functional analysis of CASP9 mutations in a Chinese cohort with neural tube defects.                              | Liu XZ et al.      | 29365368                  | Not a renal disease focus |
| 17 |                                                                                                                        |                                                                                                                                         |                    |                           |                           |
| 18 | 1                                                                                                                      | The relationship between ACE/AGT gene polymorphisms and the risk of diabetic retinopathy in Chinese patients with type 2 diabetes.      | Qiao YC et al.     | 29378484                  | Not a renal disease focus |
| 19 |                                                                                                                        |                                                                                                                                         |                    |                           |                           |
| 20 | 1                                                                                                                      | HIPK2 polymorphisms rs2058265, rs6464214, and rs7456421 were associated with kidney stone disease in Chinese males not females.         | Lin H et al.       | 29428801                  | Not a renal disease focus |
| 21 |                                                                                                                        |                                                                                                                                         |                    |                           |                           |
| 22 | 1                                                                                                                      | The association of endothelial nitric oxide synthase gene single nucleotide polymorphisms with paediatric systemic lupus erythematosus. | Zhu J et al.       | 29465350                  | Not a renal disease focus |
| 23 |                                                                                                                        |                                                                                                                                         |                    |                           |                           |
| 24 | 1                                                                                                                      | Common Variants in ALPL Gene Contribute to the Risk of Kidney Stones in the Han Chinese Population.                                     | Li X et al.        | 29489416                  | Not a renal disease focus |
| 25 |                                                                                                                        |                                                                                                                                         |                    |                           |                           |
| 26 | 1                                                                                                                      | Impact of eNOS 27-bp VNTR (4b/a) gene polymorphism with the risk of Systemic Lupus Erythematosus in south Indian subjects.              | Katkam SK et al.   | 29524578                  | Not a renal disease focus |
| 27 |                                                                                                                        |                                                                                                                                         |                    |                           |                           |
| 28 | 1                                                                                                                      | Rationale, design, and preliminary results of the Quebec Warfarin Cohort Study.                                                         | Perreault S et al. | 29542828                  | Not a renal disease focus |
| 29 |                                                                                                                        |                                                                                                                                         |                    |                           |                           |
| 30 | 1                                                                                                                      | The evaluation of two genetic polymorphisms of paraoxonase 1 in patients with pulmonary embolism.                                       | Basol N et al.     | 29682786                  | Not a renal disease focus |
| 31 |                                                                                                                        |                                                                                                                                         |                    |                           |                           |
| 32 |                                                                                                                        |                                                                                                                                         |                    |                           |                           |
| 33 |                                                                                                                        |                                                                                                                                         |                    |                           |                           |
| 34 |                                                                                                                        |                                                                                                                                         |                    |                           |                           |
| 35 |                                                                                                                        |                                                                                                                                         |                    |                           |                           |
| 36 |                                                                                                                        |                                                                                                                                         |                    |                           |                           |
| 37 |                                                                                                                        |                                                                                                                                         |                    |                           |                           |
| 38 |                                                                                                                        |                                                                                                                                         |                    |                           |                           |
| 39 |                                                                                                                        |                                                                                                                                         |                    |                           |                           |
| 40 |                                                                                                                        |                                                                                                                                         |                    |                           |                           |
| 41 |                                                                                                                        |                                                                                                                                         |                    |                           |                           |
| 42 |                                                                                                                        |                                                                                                                                         |                    |                           |                           |
| 43 |                                                                                                                        |                                                                                                                                         |                    |                           |                           |
| 44 |                                                                                                                        |                                                                                                                                         |                    |                           |                           |
| 45 |                                                                                                                        |                                                                                                                                         |                    |                           |                           |
| 46 |                                                                                                                        |                                                                                                                                         |                    |                           |                           |

|    |                                                                                                                                                                            |                        |          |                           |
|----|----------------------------------------------------------------------------------------------------------------------------------------------------------------------------|------------------------|----------|---------------------------|
| 1  | HCMV UL97 phosphotransferase gene mutations may be associated with antiviral resistance in immunocompromised patients in Belém, PA, Northern Brazil.                       | Silva DFLD et al.      | 29768545 | Not a renal disease focus |
| 2  |                                                                                                                                                                            |                        |          |                           |
| 3  |                                                                                                                                                                            |                        |          |                           |
| 4  |                                                                                                                                                                            |                        |          |                           |
| 5  |                                                                                                                                                                            |                        |          |                           |
| 6  |                                                                                                                                                                            |                        |          |                           |
| 7  | Screening for mutation hotspots in Bardet-Biedl syndrome patients from India.                                                                                              | Chandrasekar SP et al. | 29806606 | Not a renal disease focus |
| 8  |                                                                                                                                                                            |                        |          |                           |
| 9  | Angiotensin Converting Enzyme Gene Insertion/Deletion Variant and Familial Mediterranean Fever-related Amyloidosis.                                                        | Nursal AF et al.       | 29891744 | Not a renal disease focus |
| 10 |                                                                                                                                                                            |                        |          |                           |
| 11 | Base Excision Repair Gene Polymorphisms and Wilms Tumor Susceptibility.                                                                                                    | Zhu J et al.           | 29937070 | Not a renal disease focus |
| 12 |                                                                                                                                                                            |                        |          |                           |
| 13 | Concomitance of Polymorphisms in Glutathione Transferase Omega Genes Is Associated with Risk of Clear Cell Renal Cell Carcinoma.                                           | Radic TM et al.        | 30224590 | Not a renal disease focus |
| 14 |                                                                                                                                                                            |                        |          |                           |
| 15 | Dissociation of Fatty Liver and Insulin Resistance in I148M PNPLA3 Carriers: Differences in Diacylglycerol (DAG) FA18:1 Lipid Species as a Possible Explanation.           | Franko A et al.        | 30227635 | Not a renal disease focus |
| 16 |                                                                                                                                                                            |                        |          |                           |
| 17 | [Uric acid stones in children. Identification and therapy of a newly detected defect of adenine-phosphoribosyltransferase (author's transl)].                              | Simmonds HA            | 118367   | Not English or Spanish    |
| 18 |                                                                                                                                                                            |                        |          |                           |
| 19 | [The functional properties of the erythrocyte membranes in patients with chronic glomerulonephritis].                                                                      | Rakhov DA et al.       | 1475876  | Not English or Spanish    |
| 20 |                                                                                                                                                                            |                        |          |                           |
| 21 | [Lipid peroxidation and the antioxidant system in bicarbonate hemodialysis and acetate-free biofiltration].                                                                | Eiselt J et al.        | 7762187  | Not English or Spanish    |
| 22 |                                                                                                                                                                            |                        |          |                           |
| 23 | [A study on angiotensin-I converting enzyme polymorphism in CAPD patients].                                                                                                | Nishina M              | 9014479  | Not English or Spanish    |
| 24 |                                                                                                                                                                            |                        |          |                           |
| 25 | [Is PstI polymorphism of the angiotensin I converting enzyme gene associated with nephropathy development in non-insulin-dependent diabetes mellitus (preliminary study)]. | Grzeszczak W et al.    | 9499204  | Not English or Spanish    |
| 26 |                                                                                                                                                                            |                        |          |                           |
| 27 | [Relationship between angiotensin 1 converting enzyme gene polymorphism and diabetic nephropathy].                                                                         | Wu S et al.            | 9596955  | Not English or Spanish    |
| 28 |                                                                                                                                                                            |                        |          |                           |
| 29 | [Polymorphism studies of angiotensin converting enzyme gene in chronic glomerulonephritis].                                                                                | Kutyryna IM et al.     | 10420452 | Not English or Spanish    |
| 30 |                                                                                                                                                                            |                        |          |                           |
| 31 | [Angiotensin-converting enzyme gene polymorphism and the clinical pathological features and progression in lupus nephritis].                                               | Guan T et al.          | 10436947 | Not English or Spanish    |
| 32 |                                                                                                                                                                            |                        |          |                           |
| 33 |                                                                                                                                                                            |                        |          |                           |
| 34 |                                                                                                                                                                            |                        |          |                           |
| 35 |                                                                                                                                                                            |                        |          |                           |
| 36 |                                                                                                                                                                            |                        |          |                           |
| 37 |                                                                                                                                                                            |                        |          |                           |
| 38 |                                                                                                                                                                            |                        |          |                           |
| 39 |                                                                                                                                                                            |                        |          |                           |
| 40 |                                                                                                                                                                            |                        |          |                           |
| 41 |                                                                                                                                                                            |                        |          |                           |
| 42 |                                                                                                                                                                            |                        |          |                           |
| 43 |                                                                                                                                                                            |                        |          |                           |
| 44 |                                                                                                                                                                            |                        |          |                           |
| 45 |                                                                                                                                                                            |                        |          |                           |
| 46 |                                                                                                                                                                            |                        |          |                           |

|    |                                                                                                             |                                                                                                                                                                                                                     |                       |                        |                        |
|----|-------------------------------------------------------------------------------------------------------------|---------------------------------------------------------------------------------------------------------------------------------------------------------------------------------------------------------------------|-----------------------|------------------------|------------------------|
| 1  | [Association between ACE gene polymorphism and therapeutic responsiveness of ACEI in diabetic nephropathy]. | Wang L et al.                                                                                                                                                                                                       | 10923445              | Not English or Spanish |                        |
| 2  |                                                                                                             |                                                                                                                                                                                                                     |                       |                        |                        |
| 3  |                                                                                                             |                                                                                                                                                                                                                     |                       |                        |                        |
| 4  | 1                                                                                                           | [Increased clinical and economic advantages using PROSIT (proteinuria screening and intervention) in type 2 diabetic patients].                                                                                     | Gozzoli V et al.      | 11075242               | Not English or Spanish |
| 5  |                                                                                                             |                                                                                                                                                                                                                     |                       |                        |                        |
| 6  |                                                                                                             |                                                                                                                                                                                                                     |                       |                        |                        |
| 7  | 1                                                                                                           | [Association between insertion-deletion polymorphism of the angiotensin-converting enzyme gene and development of angiopathies in patients with non-insulin dependent diabetes mellitus from the Chuvash Republic]. | Miloserdova OV et al. | 11234416               | Not English or Spanish |
| 8  |                                                                                                             |                                                                                                                                                                                                                     |                       |                        |                        |
| 9  |                                                                                                             |                                                                                                                                                                                                                     |                       |                        |                        |
| 10 | 1                                                                                                           | [Renin-angiotensin system genes in chronic glomerulonephritis].                                                                                                                                                     | Buraczynska M et al.  | 11865575               | Not English or Spanish |
| 11 |                                                                                                             |                                                                                                                                                                                                                     |                       |                        |                        |
| 12 |                                                                                                             |                                                                                                                                                                                                                     |                       |                        |                        |
| 13 | 1                                                                                                           | [The association between polymorphism of endothelial nitric oxide synthase gene and diabetic nephropathy].                                                                                                          | Li C et al.           | 11930675               | Not English or Spanish |
| 14 |                                                                                                             |                                                                                                                                                                                                                     |                       |                        |                        |
| 15 |                                                                                                             |                                                                                                                                                                                                                     |                       |                        |                        |
| 16 | 1                                                                                                           | [Relationship between serum angiotensin I-converting enzyme activity and diabetic nephropathy in patients with type II diabetes].                                                                                   | Liao L et al.         | 12016801               | Not English or Spanish |
| 17 |                                                                                                             |                                                                                                                                                                                                                     |                       |                        |                        |
| 18 |                                                                                                             |                                                                                                                                                                                                                     |                       |                        |                        |
| 19 | 1                                                                                                           | [Acquired mutation of type II transforming growth factor-beta receptor gene in glomerulosclerosis].                                                                                                                 | Liu Z et al.          | 12126523               | Not English or Spanish |
| 20 |                                                                                                             |                                                                                                                                                                                                                     |                       |                        |                        |
| 21 |                                                                                                             |                                                                                                                                                                                                                     |                       |                        |                        |
| 22 | 1                                                                                                           | [Renal effects of low doses of mercury].                                                                                                                                                                            | Alinovi R et al.      | 12197269               | Not English or Spanish |
| 23 |                                                                                                             |                                                                                                                                                                                                                     |                       |                        |                        |
| 24 |                                                                                                             |                                                                                                                                                                                                                     |                       |                        |                        |
| 25 | 1                                                                                                           | [Association of ecNOS 4 b/a polymorphism and end-stage chronic renal failure].                                                                                                                                      | Lin S et al.          | 12421496               | Not English or Spanish |
| 26 |                                                                                                             |                                                                                                                                                                                                                     |                       |                        |                        |
| 27 |                                                                                                             |                                                                                                                                                                                                                     |                       |                        |                        |
| 28 | 1                                                                                                           | [Associative analysis of the connection between mutation C1167T in the catalase gene and polymorphic marker D6S392 nearby the Mn-dependent superoxide dismutase gene with diabetic microangiopathies].              | Chistiakov D et al.   | 12469627               | Not English or Spanish |
| 29 |                                                                                                             |                                                                                                                                                                                                                     |                       |                        |                        |
| 30 |                                                                                                             |                                                                                                                                                                                                                     |                       |                        |                        |
| 31 | 1                                                                                                           | [Association of the renin-angiotensin system gene polymorphism with nephropathy in type II diabetes].                                                                                                               | Buraczynska M et al.  | 12476891               | Not English or Spanish |
| 32 |                                                                                                             |                                                                                                                                                                                                                     |                       |                        |                        |
| 33 |                                                                                                             |                                                                                                                                                                                                                     |                       |                        |                        |
| 34 | 1                                                                                                           | [Study on candidate genes of benazepril related cough in Chinese hypertensives].                                                                                                                                    | Lu J et al.           | 12848919               | Not English or Spanish |
| 35 |                                                                                                             |                                                                                                                                                                                                                     |                       |                        |                        |
| 36 |                                                                                                             |                                                                                                                                                                                                                     |                       |                        |                        |
| 37 | 1                                                                                                           | [Polymorphism at the glutathione S-transferase pi locus as a risk factor for ifosfamide nephrotoxicity in children].                                                                                                | Zielinska E et al.    | 12868187               | Not English or Spanish |
| 38 |                                                                                                             |                                                                                                                                                                                                                     |                       |                        |                        |
| 39 |                                                                                                             |                                                                                                                                                                                                                     |                       |                        |                        |
| 40 | 1                                                                                                           | [Correlation analysis between WNK4 gene and essential hypertension].                                                                                                                                                | Sun ZJ et al.         | 12905707               | Not English or Spanish |
| 41 |                                                                                                             |                                                                                                                                                                                                                     |                       |                        |                        |
| 42 |                                                                                                             |                                                                                                                                                                                                                     |                       |                        |                        |
| 43 |                                                                                                             |                                                                                                                                                                                                                     |                       |                        |                        |
| 44 |                                                                                                             |                                                                                                                                                                                                                     |                       |                        |                        |
| 45 |                                                                                                             |                                                                                                                                                                                                                     |                       |                        |                        |
| 46 |                                                                                                             |                                                                                                                                                                                                                     |                       |                        |                        |

|    |                                                                                                                                                                                                  |                       |          |                        |
|----|--------------------------------------------------------------------------------------------------------------------------------------------------------------------------------------------------|-----------------------|----------|------------------------|
| 1  | [Arterial hypertension in glomerulonephritis].                                                                                                                                                   | Oko A et al.          | 14974362 | Not English or Spanish |
| 2  |                                                                                                                                                                                                  |                       |          |                        |
| 3  |                                                                                                                                                                                                  |                       |          |                        |
| 4  |                                                                                                                                                                                                  |                       |          |                        |
| 5  |                                                                                                                                                                                                  |                       |          |                        |
| 6  | 1 [Search for the association of polymorphic markers for genes coding for antioxidant defense enzymes, with development of diabetic polyneuropathies in patients with type 1 diabetes mellitus]. | Zotova EV et al.      | 15125229 | Not English or Spanish |
| 7  |                                                                                                                                                                                                  |                       |          |                        |
| 8  |                                                                                                                                                                                                  |                       |          |                        |
| 9  | 1 [Association of the complex of polymorphic markers of ACE genes, aldosterone synthetase and endothelial synthetase of nitric oxide with progression of chronic glomerulonephritis].            | Kamysheva ES et al.   | 15532370 | Not English or Spanish |
| 10 |                                                                                                                                                                                                  |                       |          |                        |
| 11 |                                                                                                                                                                                                  |                       |          |                        |
| 12 | 1 [Correlative study between angiotensin-converting enzyme gene polymorphism and hepatorenal syndrome].                                                                                          | Wu XX et al.          | 15698501 | Not English or Spanish |
| 13 |                                                                                                                                                                                                  |                       |          |                        |
| 14 | 1 [Screening for new binding proteins which interact with BM2 of influenza B virus with yeast two-hybrid system].                                                                                | Yu H et al.           | 16027793 | Not English or Spanish |
| 15 |                                                                                                                                                                                                  |                       |          |                        |
| 16 | 1 [I/D relationship between polymorphism of ACE gene and progression of chronic glomerulonephritis].                                                                                             | Kaliev RR et al.      | 16078593 | Not English or Spanish |
| 17 |                                                                                                                                                                                                  |                       |          |                        |
| 18 | 1 [A search for association between the polymorphic markers of PON1 and PON2 genes and diabetic nephropathy in patients with type I diabetes mellitus].                                          | Voron'ko OE et al.    | 16080611 | Not English or Spanish |
| 19 |                                                                                                                                                                                                  |                       |          |                        |
| 20 | 1 [Correlation of cyclin D1 overexpression to mutations of von hippel-lindau gene in renal clear cell carcinoma].                                                                                | Ren YY et al.         | 16480581 | Not English or Spanish |
| 21 |                                                                                                                                                                                                  |                       |          |                        |
| 22 | 1 [Activation of RHOA gene transcription in epithelial tumors may be caused by gene amplification and/or demethylation of its promotor region].                                                  | Braga EA et al.       | 17086988 | Not English or Spanish |
| 23 |                                                                                                                                                                                                  |                       |          |                        |
| 24 | 1 [Association of aldosterone synthase gene -344 T/C polymorphism with early renal damage in Han nationality with essential hypertension].                                                       | Sun XJ et al.         | 17407071 | Not English or Spanish |
| 25 |                                                                                                                                                                                                  |                       |          |                        |
| 26 | 1 [Relationship between I/D polymorphism of angiotensin I converting enzyme gene and microvascular complications in type 2 diabetic patients].                                                   | Moleda P et al.       | 17941464 | Not English or Spanish |
| 27 |                                                                                                                                                                                                  |                       |          |                        |
| 28 | 1 [Inactivation of the VHL gene in sporadic clear cell renal cancer].                                                                                                                            | Mikhailenko DS et al. | 18389622 | Not English or Spanish |
| 29 |                                                                                                                                                                                                  |                       |          |                        |
| 30 | 1 [Association of alpha-adducin and angiotensin converting enzyme gene polymorphisms with salt-sensitive hypertension and early renal injury].                                                   | Lu LH et al.          | 18393230 | Not English or Spanish |
| 31 |                                                                                                                                                                                                  |                       |          |                        |
| 32 | 1 [Distribution of polymorphism in endothelial nitric oxide synthase gene in Singapore Chinese and its association with diabetic nephropathy].                                                   | Dong JJ et al.        | 18476541 | Not English or Spanish |
| 33 |                                                                                                                                                                                                  |                       |          |                        |
| 34 |                                                                                                                                                                                                  |                       |          |                        |
| 35 |                                                                                                                                                                                                  |                       |          |                        |
| 36 |                                                                                                                                                                                                  |                       |          |                        |
| 37 |                                                                                                                                                                                                  |                       |          |                        |
| 38 |                                                                                                                                                                                                  |                       |          |                        |
| 39 |                                                                                                                                                                                                  |                       |          |                        |
| 40 |                                                                                                                                                                                                  |                       |          |                        |
| 41 |                                                                                                                                                                                                  |                       |          |                        |
| 42 |                                                                                                                                                                                                  |                       |          |                        |
| 43 |                                                                                                                                                                                                  |                       |          |                        |
| 44 |                                                                                                                                                                                                  |                       |          |                        |
| 45 |                                                                                                                                                                                                  |                       |          |                        |
| 46 |                                                                                                                                                                                                  |                       |          |                        |

|    |                                                                                                               |                                                                                                                                                                                        |                             |                        |                        |
|----|---------------------------------------------------------------------------------------------------------------|----------------------------------------------------------------------------------------------------------------------------------------------------------------------------------------|-----------------------------|------------------------|------------------------|
| 1  | [Effect of tissue factor pathway inhibitor on apoptosis of rat mesangial cells and Fas and bcl-2 expression]. | Lin YF et al.                                                                                                                                                                          | 19094710                    | Not English or Spanish |                        |
| 2  |                                                                                                               |                                                                                                                                                                                        |                             |                        |                        |
| 3  |                                                                                                               |                                                                                                                                                                                        |                             |                        |                        |
| 4  | 1                                                                                                             | [Genetic predisposition to systemic complications of arterial hypertension in maintenance haemodialysis patients].                                                                     | Bzoma B et al.              | 19112833               | Not English or Spanish |
| 5  |                                                                                                               |                                                                                                                                                                                        |                             |                        |                        |
| 6  | 1                                                                                                             | [Factors responsible for inter-individual variations in dosage/concentration of tacrolimus in renal transplant recipients].                                                            | Fu SJ et al.                | 19114346               | Not English or Spanish |
| 7  |                                                                                                               |                                                                                                                                                                                        |                             |                        |                        |
| 8  | 1                                                                                                             | [Association analysis of genetic polymorphisms of TCF7L2, CDKAL1, SLC30A8, HHEX genes and microvascular complications of type 2 diabetes mellitus].                                    | Fu LL et al.                | 22487833               | Not English or Spanish |
| 9  |                                                                                                               |                                                                                                                                                                                        |                             |                        |                        |
| 10 | 1                                                                                                             | [Angiotensin-converting enzyme insertion/deletion polymorphism and blood pressure regulation in type 2 diabetic patients].                                                             | Krajina-Andricevic M et al. | 23120809               | Not English or Spanish |
| 11 |                                                                                                               |                                                                                                                                                                                        |                             |                        |                        |
| 12 | 1                                                                                                             | [Association between mannose-binding lectin 2 gene and protein kinase C-beta 1 gene polymorphisms and type 2 diabetic macrovascular complications in northern Chinese Han population]. | Zhang NN et al.             | 23225056               | Not English or Spanish |
| 13 |                                                                                                               |                                                                                                                                                                                        |                             |                        |                        |
| 14 | 1                                                                                                             | [Gene polymorphisms of CYP3A5 and MDR-1 in Hans renal transplant recipients in Hunan Province].                                                                                        | Shao M et al.               | 23981990               | Not English or Spanish |
| 15 |                                                                                                               |                                                                                                                                                                                        |                             |                        |                        |
| 16 | 1                                                                                                             | [Association of CYP3A5 and MDR1 genetic polymorphisms with the blood concentration of tacrolimus in Chinese liver and renal transplant recipients].                                    | Sun JY et al.               | 24059111               | Not English or Spanish |
| 17 |                                                                                                               |                                                                                                                                                                                        |                             |                        |                        |
| 18 | 1                                                                                                             | [Gene mutation analysis of X-linked hypophosphatemic rickets].                                                                                                                         | Song Y et al.               | 24229582               | Not English or Spanish |
| 19 |                                                                                                               |                                                                                                                                                                                        |                             |                        |                        |
| 20 | 1                                                                                                             | [Mutational analysis of MYO1E in children with sporadic steroid-resistant nephrotic syndrome in Chinese Han ethnic group].                                                             | Zhao F et al.               | 25224051               | Not English or Spanish |
| 21 |                                                                                                               |                                                                                                                                                                                        |                             |                        |                        |
| 22 | 1                                                                                                             | [Children with idiopathic hypogonadotropic hypogonadism: clinical data analysis and mutations analysis of KAL1 and FGFR1 gene].                                                        | Qin M et al.                | 25619354               | Not English or Spanish |
| 23 |                                                                                                               |                                                                                                                                                                                        |                             |                        |                        |
| 24 | 1                                                                                                             | [DNA repair XRCC1, XPD genes polymorphism as associated with the development of bladder cancer and renal cell carcinoma].                                                              | Akhmadishina LZ et al.      | 25715450               | Not English or Spanish |
| 25 |                                                                                                               |                                                                                                                                                                                        |                             |                        |                        |
| 26 | 1                                                                                                             | [Association between angiotensin-converting enzyme 2 gene polymorphisms and childhood primary nephrotic syndrome].                                                                     | Qiu MY et al.               | 25815490               | Not English or Spanish |
| 27 |                                                                                                               |                                                                                                                                                                                        |                             |                        |                        |
| 28 | 1                                                                                                             | [GENETIC RISK FACTORS FOR MULTIPLE KIDNEY STONE FORMATION IN THE RUSSIAN POPULATION].                                                                                                  | Apolihin OI et al.          | 26665756               | Not English or Spanish |
| 29 |                                                                                                               |                                                                                                                                                                                        |                             |                        |                        |
| 30 |                                                                                                               |                                                                                                                                                                                        |                             |                        |                        |
| 31 |                                                                                                               |                                                                                                                                                                                        |                             |                        |                        |
| 32 |                                                                                                               |                                                                                                                                                                                        |                             |                        |                        |
| 33 |                                                                                                               |                                                                                                                                                                                        |                             |                        |                        |
| 34 |                                                                                                               |                                                                                                                                                                                        |                             |                        |                        |
| 35 |                                                                                                               |                                                                                                                                                                                        |                             |                        |                        |
| 36 |                                                                                                               |                                                                                                                                                                                        |                             |                        |                        |
| 37 |                                                                                                               |                                                                                                                                                                                        |                             |                        |                        |
| 38 |                                                                                                               |                                                                                                                                                                                        |                             |                        |                        |
| 39 |                                                                                                               |                                                                                                                                                                                        |                             |                        |                        |
| 40 |                                                                                                               |                                                                                                                                                                                        |                             |                        |                        |
| 41 |                                                                                                               |                                                                                                                                                                                        |                             |                        |                        |
| 42 |                                                                                                               |                                                                                                                                                                                        |                             |                        |                        |
| 43 |                                                                                                               |                                                                                                                                                                                        |                             |                        |                        |
| 44 |                                                                                                               |                                                                                                                                                                                        |                             |                        |                        |
| 45 |                                                                                                               |                                                                                                                                                                                        |                             |                        |                        |
| 46 |                                                                                                               |                                                                                                                                                                                        |                             |                        |                        |



|    |                                                                                                                                                                |                      |          |                        |
|----|----------------------------------------------------------------------------------------------------------------------------------------------------------------|----------------------|----------|------------------------|
| 1  | [Polymorphism at the miR-502 binding site in the 3' untranslated region of SET8 gene is associated with the risk of clear cell renal cell carcinoma].          | Xu JS et al.         | 27346408 | Not English or Spanish |
| 2  |                                                                                                                                                                |                      |          |                        |
| 3  |                                                                                                                                                                |                      |          |                        |
| 4  |                                                                                                                                                                |                      |          |                        |
| 5  |                                                                                                                                                                |                      |          |                        |
| 6  | 1 [Expression of cadherin17 in metanephric adenoma and its value in differential diagnosis].                                                                   | Wang X et al.        | 27430690 | Not English or Spanish |
| 7  |                                                                                                                                                                |                      |          |                        |
| 8  |                                                                                                                                                                |                      |          |                        |
| 9  | 1 [Clinical and immunological analysis of patients with activated phosphoinositide 3-kinase $\hat{\Gamma}$ syndrome resulting from PIK3CD mutation].           | Tang WJ et al.       | 28072954 | Not English or Spanish |
| 10 |                                                                                                                                                                |                      |          |                        |
| 11 | 1 [Molecular features of metanephric adenoma and their values in differential diagnosis].                                                                      | Wang X et al.        | 28072975 | Not English or Spanish |
| 12 |                                                                                                                                                                |                      |          |                        |
| 13 |                                                                                                                                                                |                      |          |                        |
| 14 | 1 [Early diagnosis of risk for developing calcium oxalate urolithiasis].                                                                                       | Apolikhin OI et al.  | 28845932 | Not English or Spanish |
| 15 |                                                                                                                                                                |                      |          |                        |
| 16 | 1 HLA extended haplotypes in steroid-sensitive nephrotic syndrome of childhood.                                                                                | Lagueruela CC et al. | 1974661  | Paediatric individuals |
| 17 |                                                                                                                                                                |                      |          |                        |
| 18 | 1 Major histocompatibility complex antigens in steroid-responsive nephrotic syndrome.                                                                          | McEnery PT et al.    | 2702084  | Paediatric individuals |
| 19 |                                                                                                                                                                |                      |          |                        |
| 20 |                                                                                                                                                                |                      |          |                        |
| 21 | 1 Glycosphingolipid levels in an unusual neurovisceral storage disease characterized by lactosylceramide galactosyl hydrolase deficiency: lactosylceramidosis. | Dawson G.            | 5016302  | Paediatric individuals |
| 22 |                                                                                                                                                                |                      |          |                        |
| 23 |                                                                                                                                                                |                      |          |                        |
| 24 | 1 Differentiation of human adult and fetal intestinal alkaline phosphatases with monoclonal antibodies.                                                        | Vockley J et al.     | 6437214  | Paediatric individuals |
| 25 |                                                                                                                                                                |                      |          |                        |
| 26 | 1 Deficient fumarylacetoacetate fumarylhydrolase activity in lymphocytes and fibroblasts from patients with hereditary tyrosinemia.                            | Kvittingen EA et al. | 6622096  | Paediatric individuals |
| 27 |                                                                                                                                                                |                      |          |                        |
| 28 |                                                                                                                                                                |                      |          |                        |
| 29 | 1 A polymorphism at codon 160 of human O6-methylguanine-DNA methyltransferase gene in young patients with adult type cancers and functional assay.             | Imai Y et al.        | 7586149  | Paediatric individuals |
| 30 |                                                                                                                                                                |                      |          |                        |
| 31 |                                                                                                                                                                |                      |          |                        |
| 32 | 1 Streptokinase activity among group A streptococci in relation to streptokinase genotype, plasminogen binding, and disease manifestations.                    | Tewodros W et al.    | 7783598  | Paediatric individuals |
| 33 |                                                                                                                                                                |                      |          |                        |
| 34 |                                                                                                                                                                |                      |          |                        |
| 35 | 1 Heterogeneous AVPR2 gene mutations in congenital nephrogenic diabetes insipidus.                                                                             | Wildin RS et al.     | 7913579  | Paediatric individuals |
| 36 |                                                                                                                                                                |                      |          |                        |
| 37 |                                                                                                                                                                |                      |          |                        |
| 38 | 1 Variability in the rate of 6-mercaptopurine methylation in the erythrocytes, liver and kidney in an Italian population.                                      | Ferroni MA et al.    | 8880047  | Paediatric individuals |
| 39 |                                                                                                                                                                |                      |          |                        |
| 40 |                                                                                                                                                                |                      |          |                        |
| 41 |                                                                                                                                                                |                      |          |                        |
| 42 |                                                                                                                                                                |                      |          |                        |
| 43 |                                                                                                                                                                |                      |          |                        |
| 44 |                                                                                                                                                                |                      |          |                        |
| 45 |                                                                                                                                                                |                      |          |                        |
| 46 |                                                                                                                                                                |                      |          |                        |



|    |                                                                                            |                                                                                                                                                                         |                       |                        |                        |
|----|--------------------------------------------------------------------------------------------|-------------------------------------------------------------------------------------------------------------------------------------------------------------------------|-----------------------|------------------------|------------------------|
| 1  | Prostanoid biosynthesis by blood monocytes of children with hyperprostaglandin E syndrome. | Nusing RM et al.                                                                                                                                                        | 9262230               | Paediatric individuals |                        |
| 2  |                                                                                            |                                                                                                                                                                         |                       |                        |                        |
| 3  |                                                                                            |                                                                                                                                                                         |                       |                        |                        |
| 4  | 1                                                                                          | Angiotensin I-converting enzyme-gene-polymorphism: relationship to albumin excretion and blood pressure in pediatric patients with type-I-diabetes mellitus.            | Pavlovic M et al.     | 9354852                | Paediatric individuals |
| 5  |                                                                                            |                                                                                                                                                                         |                       |                        |                        |
| 6  | 1                                                                                          | Inherited mutations in PTEN that are associated with breast cancer, cowden disease, and juvenile polyposis.                                                             | Lynch ED et al.       | 9399897                | Paediatric individuals |
| 7  |                                                                                            |                                                                                                                                                                         |                       |                        |                        |
| 8  | 1                                                                                          | ACE gene polymorphism in childhood IgA nephropathy: association with clinicopathologic findings.                                                                        | Tanaka R et al.       | 9590186                | Paediatric individuals |
| 9  |                                                                                            |                                                                                                                                                                         |                       |                        |                        |
| 10 | 1                                                                                          | ETV6-NTRK3 gene fusions and trisomy 11 establish a histogenetic link between mesoblastic nephroma and congenital fibrosarcoma.                                          | Knezevich SR et al.   | 9823307                | Paediatric individuals |
| 11 |                                                                                            |                                                                                                                                                                         |                       |                        |                        |
| 12 | 1                                                                                          | Genetic polymorphisms of the renin-angiotensin system and the outcome of focal segmental glomerulosclerosis in children.                                                | Frishberg Y et al.    | 9853248                | Paediatric individuals |
| 13 |                                                                                            |                                                                                                                                                                         |                       |                        |                        |
| 14 | 1                                                                                          | Platelet-activating factor acetylhydrolase gene mutation in Japanese nephrotic children.                                                                                | Xu H et al.           | 9853251                | Paediatric individuals |
| 15 |                                                                                            |                                                                                                                                                                         |                       |                        |                        |
| 16 | 1                                                                                          | Polymorphisms in angiotensin-converting enzyme gene and severity of renal disease in Henoch-Schoenlein patients. Italian Group of Renal Immunopathology.                | Amoroso A et al.      | 9870486                | Paediatric individuals |
| 17 |                                                                                            |                                                                                                                                                                         |                       |                        |                        |
| 18 | 1                                                                                          | Implications of certain genetic polymorphisms in scarring in vesicoureteric reflux: importance of ACE polymorphism.                                                     | Ozen S et al.         | 10401028               | Paediatric individuals |
| 19 |                                                                                            |                                                                                                                                                                         |                       |                        |                        |
| 20 | 1                                                                                          | Role of platelet-activating factor acetylhydrolase gene mutation in Japanese childhood IgA nephropathy.                                                                 | Tanaka R et al.       | 10430976               | Paediatric individuals |
| 21 |                                                                                            |                                                                                                                                                                         |                       |                        |                        |
| 22 | 1                                                                                          | ACE I/D gene polymorphism predicts renal damage in congenital uropathies.                                                                                               | Hohenfellner K et al. | 10452281               | Paediatric individuals |
| 23 |                                                                                            |                                                                                                                                                                         |                       |                        |                        |
| 24 | 1                                                                                          | Thiopurine methyltransferase activity and its relationship to the occurrence of rejection episodes in paediatric renal transplant recipients treated with azathioprine. | Dervieux T et al.     | 10594482               | Paediatric individuals |
| 25 |                                                                                            |                                                                                                                                                                         |                       |                        |                        |
| 26 | 1                                                                                          | Platelet-activating factor acetylhydrolase gene mutation in Japanese children with Escherichia coli O157-associated hemolytic uremic syndrome.                          | Xu H et al.           | 10873870               | Paediatric individuals |
| 27 |                                                                                            |                                                                                                                                                                         |                       |                        |                        |
| 28 | 1                                                                                          | Angiotensin-converting enzyme gene insertion/deletion polymorphism and renal damage in childhood uropathies.                                                            | al-Eisa A et al.      | 10986863               | Paediatric individuals |
| 29 |                                                                                            |                                                                                                                                                                         |                       |                        |                        |
| 30 |                                                                                            |                                                                                                                                                                         |                       |                        |                        |
| 31 |                                                                                            |                                                                                                                                                                         |                       |                        |                        |
| 32 |                                                                                            |                                                                                                                                                                         |                       |                        |                        |
| 33 |                                                                                            |                                                                                                                                                                         |                       |                        |                        |
| 34 |                                                                                            |                                                                                                                                                                         |                       |                        |                        |
| 35 |                                                                                            |                                                                                                                                                                         |                       |                        |                        |
| 36 |                                                                                            |                                                                                                                                                                         |                       |                        |                        |
| 37 |                                                                                            |                                                                                                                                                                         |                       |                        |                        |
| 38 |                                                                                            |                                                                                                                                                                         |                       |                        |                        |
| 39 |                                                                                            |                                                                                                                                                                         |                       |                        |                        |
| 40 |                                                                                            |                                                                                                                                                                         |                       |                        |                        |
| 41 |                                                                                            |                                                                                                                                                                         |                       |                        |                        |
| 42 |                                                                                            |                                                                                                                                                                         |                       |                        |                        |
| 43 |                                                                                            |                                                                                                                                                                         |                       |                        |                        |
| 44 |                                                                                            |                                                                                                                                                                         |                       |                        |                        |
| 45 |                                                                                            |                                                                                                                                                                         |                       |                        |                        |
| 46 |                                                                                            |                                                                                                                                                                         |                       |                        |                        |

|    |                                                                                                                                                               |                       |          |                        |
|----|---------------------------------------------------------------------------------------------------------------------------------------------------------------|-----------------------|----------|------------------------|
| 1  | Genetic polymorphism in paraoxonase is a risk factor for childhood focal segmental glomerulosclerosis.                                                        | Frishberg Y et al.    | 11096050 | Paediatric individuals |
| 2  |                                                                                                                                                               |                       |          |                        |
| 3  |                                                                                                                                                               |                       |          |                        |
| 4  |                                                                                                                                                               |                       |          |                        |
| 5  |                                                                                                                                                               |                       |          |                        |
| 6  | 1 Polymorphisms of renin-angiotensin system genes in childhood IgA nephropathy.                                                                               | Maruyama K et al.     | 11354780 | Paediatric individuals |
| 7  |                                                                                                                                                               |                       |          |                        |
| 8  |                                                                                                                                                               |                       |          |                        |
| 9  | 1 Impact of ACE I/D gene polymorphism on congenital renal malformations.                                                                                      | Hohenfellner K et al. | 11354781 | Paediatric individuals |
| 10 |                                                                                                                                                               |                       |          |                        |
| 11 | 1 Significance of ACE genotypes and medical treatments in childhood focal glomerulosclerosis.                                                                 | Hori C et al.         | 11474225 | Paediatric individuals |
| 12 |                                                                                                                                                               |                       |          |                        |
| 13 | 1 Angiotensin converting enzyme gene insertion/deletion polymorphism in idiopathic nephrotic syndrome in Kuwaiti Arab children.                               | Al-Eisa A et al.      | 11487079 | Paediatric individuals |
| 14 |                                                                                                                                                               |                       |          |                        |
| 15 | 1 Distribution and development of CLN2 protein, the late-infantile neuronal ceroid lipofuscinosis gene product.                                               | Kurachi Y et al.      | 11547947 | Paediatric individuals |
| 16 |                                                                                                                                                               |                       |          |                        |
| 17 | 1 G protein beta3 subunit 825T genotype is not associated with differing outcome in pediatric renal transplant recipients.                                    | Hocher B et al.       | 12000471 | Paediatric individuals |
| 18 |                                                                                                                                                               |                       |          |                        |
| 19 | 1 Genomic rearrangements of EYA1 account for a large fraction of families with BOR syndrome.                                                                  | Vervoort VS et al.    | 12404110 | Paediatric individuals |
| 20 |                                                                                                                                                               |                       |          |                        |
| 21 | 1 Novel ATP6V1B1 and ATP6V0A4 mutations in autosomal recessive distal renal tubular acidosis with new evidence for hearing loss.                              | Stover EH et al.      | 12414817 | Paediatric individuals |
| 22 |                                                                                                                                                               |                       |          |                        |
| 23 | 1 ACE gene polymorphism and renal scarring in primary vesicoureteric reflux.                                                                                  | Haszon I et al.       | 12478352 | Paediatric individuals |
| 24 |                                                                                                                                                               |                       |          |                        |
| 25 | 1 Renin-angiotensin system polymorphisms and renal scarring.                                                                                                  | Pardo R et al.        | 12579398 | Paediatric individuals |
| 26 |                                                                                                                                                               |                       |          |                        |
| 27 | 1 Renin-angiotensin gene polymorphism in children with uremia and essential hypertension.                                                                     | Papp F et al.         | 12579405 | Paediatric individuals |
| 28 |                                                                                                                                                               |                       |          |                        |
| 29 | 1 HbA1c levels and erythrocyte transport functions in complication-free type 1 diabetic children and adolescents.                                             | Deak B et al.         | 12682823 | Paediatric individuals |
| 30 |                                                                                                                                                               |                       |          |                        |
| 31 | 1 Genetic heterogeneity of peroxisome biogenesis disorders among Japanese patients: evidence for a founder haplotype for the most common PEX10 gene mutation. | Shimozawa N et al.    | 12794690 | Paediatric individuals |
| 32 |                                                                                                                                                               |                       |          |                        |
| 33 | 1 Angiotensin converting enzyme gene polymorphism in Asian Indian children with congenital uropathies.                                                        | Bajpai M et al.       | 14713838 | Paediatric individuals |
| 34 |                                                                                                                                                               |                       |          |                        |
| 35 |                                                                                                                                                               |                       |          |                        |
| 36 |                                                                                                                                                               |                       |          |                        |
| 37 |                                                                                                                                                               |                       |          |                        |
| 38 |                                                                                                                                                               |                       |          |                        |
| 39 |                                                                                                                                                               |                       |          |                        |
| 40 |                                                                                                                                                               |                       |          |                        |
| 41 |                                                                                                                                                               |                       |          |                        |
| 42 |                                                                                                                                                               |                       |          |                        |
| 43 |                                                                                                                                                               |                       |          |                        |
| 44 |                                                                                                                                                               |                       |          |                        |
| 45 |                                                                                                                                                               |                       |          |                        |
| 46 |                                                                                                                                                               |                       |          |                        |

|    |                                                                                     |                                                                                                                                                                                  |                     |                        |                        |
|----|-------------------------------------------------------------------------------------|----------------------------------------------------------------------------------------------------------------------------------------------------------------------------------|---------------------|------------------------|------------------------|
| 1  | ACE I/D gene polymorphism in primary FSGS and steroid-sensitive nephrotic syndrome. | Oktem F et al.                                                                                                                                                                   | 14986085            | Paediatric individuals |                        |
| 2  |                                                                                     |                                                                                                                                                                                  |                     |                        |                        |
| 3  |                                                                                     |                                                                                                                                                                                  |                     |                        |                        |
| 4  | 1                                                                                   | Renin-angiotensin system polymorphisms in Taiwanese primary vesicoureteral reflux.                                                                                               | Liu KP et al.       | 15045574               | Paediatric individuals |
| 5  |                                                                                     |                                                                                                                                                                                  |                     |                        |                        |
| 6  | 1                                                                                   | Is ACE gene polymorphism a risk factor for renal scarring with low-grade reflux?                                                                                                 | Erdogan H et al.    | 15138870               | Paediatric individuals |
| 7  |                                                                                     |                                                                                                                                                                                  |                     |                        |                        |
| 8  | 1                                                                                   | ACE and AT1 receptor gene polymorphisms and renal scarring in urinary bladder dysfunction.                                                                                       | Kostic M et al.     | 15179569               | Paediatric individuals |
| 9  |                                                                                     |                                                                                                                                                                                  |                     |                        |                        |
| 10 | 1                                                                                   | Angiotensin-converting enzyme gene insertion/deletion polymorphism in children with Henoch-Schonlein purpura nephritis.                                                          | Zhou J et al.       | 15315169               | Paediatric individuals |
| 11 |                                                                                     |                                                                                                                                                                                  |                     |                        |                        |
| 12 | 1                                                                                   | Late effects on renal glomerular and tubular function in childhood cancer survivors.                                                                                             | Bardi E et al.      | 15390293               | Paediatric individuals |
| 13 |                                                                                     |                                                                                                                                                                                  |                     |                        |                        |
| 14 | 1                                                                                   | Role of truncating mutations in MME gene in fetomaternal alloimmunisation and antenatal glomerulopathies.                                                                        | Debiec H et al.     | 15464186               | Paediatric individuals |
| 15 |                                                                                     |                                                                                                                                                                                  |                     |                        |                        |
| 16 | 1                                                                                   | Angiotensin-converting enzyme and angiotensin type 2 receptor gene genotype distributions in Italian children with congenital uropathies.                                        | Rigoli L et al.     | 15470205               | Paediatric individuals |
| 17 |                                                                                     |                                                                                                                                                                                  |                     |                        |                        |
| 18 | 1                                                                                   | Low renin-angiotensin system activity gene polymorphism and dysplasia associated with posterior urethral valves.                                                                 | Peruzzi L et al.    | 16006956               | Paediatric individuals |
| 19 |                                                                                     |                                                                                                                                                                                  |                     |                        |                        |
| 20 | 1                                                                                   | Polymorphisms of the angiotensin converting enzyme and angiotensin II type 1 receptor genes and renal scarring in non-uropathic children with recurrent urinary tract infection. | Ece A et al.        | 16109085               | Paediatric individuals |
| 21 |                                                                                     |                                                                                                                                                                                  |                     |                        |                        |
| 22 | 1                                                                                   | Implication of genetic variations in congenital obstructive nephropathy.                                                                                                         | Hahn H et al.       | 16133060               | Paediatric individuals |
| 23 |                                                                                     |                                                                                                                                                                                  |                     |                        |                        |
| 24 | 1                                                                                   | Is paraoxonase 192 gene polymorphism a risk factor for membranoproliferative glomerulonephritis in children?                                                                     | Bilge I et al.      | 16175651               | Paediatric individuals |
| 25 |                                                                                     |                                                                                                                                                                                  |                     |                        |                        |
| 26 | 1                                                                                   | ACE gene insertion/deletion polymorphism in childhood idiopathic nephrotic syndrome.                                                                                             | Serdaroglu E et al. | 16208534               | Paediatric individuals |
| 27 |                                                                                     |                                                                                                                                                                                  |                     |                        |                        |
| 28 | 1                                                                                   | Angiotensin converting enzyme gene polymorphism in Indian children with steroid sensitive nephrotic syndrome.                                                                    | Patil SJ et al.     | 16272677               | Paediatric individuals |
| 29 |                                                                                     |                                                                                                                                                                                  |                     |                        |                        |
| 30 | 1                                                                                   | Evaluation of the antitumor efficacy, pharmacokinetics, and pharmacodynamics of the histone deacetylase inhibitor depsipeptide in childhood cancer models in vivo.               | Graham C et al.     | 16397046               | Paediatric individuals |
| 31 |                                                                                     |                                                                                                                                                                                  |                     |                        |                        |
| 32 |                                                                                     |                                                                                                                                                                                  |                     |                        |                        |
| 33 |                                                                                     |                                                                                                                                                                                  |                     |                        |                        |
| 34 |                                                                                     |                                                                                                                                                                                  |                     |                        |                        |
| 35 |                                                                                     |                                                                                                                                                                                  |                     |                        |                        |
| 36 |                                                                                     |                                                                                                                                                                                  |                     |                        |                        |
| 37 |                                                                                     |                                                                                                                                                                                  |                     |                        |                        |
| 38 |                                                                                     |                                                                                                                                                                                  |                     |                        |                        |
| 39 |                                                                                     |                                                                                                                                                                                  |                     |                        |                        |
| 40 |                                                                                     |                                                                                                                                                                                  |                     |                        |                        |
| 41 |                                                                                     |                                                                                                                                                                                  |                     |                        |                        |
| 42 |                                                                                     |                                                                                                                                                                                  |                     |                        |                        |
| 43 |                                                                                     |                                                                                                                                                                                  |                     |                        |                        |
| 44 |                                                                                     |                                                                                                                                                                                  |                     |                        |                        |
| 45 |                                                                                     |                                                                                                                                                                                  |                     |                        |                        |
| 46 |                                                                                     |                                                                                                                                                                                  |                     |                        |                        |

|    |                                                                                         |                                                                                                                                                       |                            |                        |                        |
|----|-----------------------------------------------------------------------------------------|-------------------------------------------------------------------------------------------------------------------------------------------------------|----------------------------|------------------------|------------------------|
| 1  | ACE gene polymorphism in children with nephrotic syndrome in the Indonesian population. | Sasongko TH et al.                                                                                                                                    | 16421456                   | Paediatric individuals |                        |
| 2  |                                                                                         |                                                                                                                                                       |                            |                        |                        |
| 3  |                                                                                         |                                                                                                                                                       |                            |                        |                        |
| 4  | 1                                                                                       | Renin-angiotensin system gene polymorphisms: association with susceptibility to Henoch-Schonlein purpura and renal involvement.                       | Ozkaya O et al.            | 16521052               | Paediatric individuals |
| 5  |                                                                                         |                                                                                                                                                       |                            |                        |                        |
| 6  |                                                                                         |                                                                                                                                                       |                            |                        |                        |
| 7  | 1                                                                                       | Paraoxonase 1 192 and 55 polymorphisms in nephrotic children.                                                                                         | Biyikli NK et al.          | 16565923               | Paediatric individuals |
| 8  |                                                                                         |                                                                                                                                                       |                            |                        |                        |
| 9  |                                                                                         |                                                                                                                                                       |                            |                        |                        |
| 10 | 1                                                                                       | Angiotensin-converting enzyme gene polymorphism in children with idiopathic nephrotic syndrome.                                                       | Tsai IJ et al.             | 16645262               | Paediatric individuals |
| 11 |                                                                                         |                                                                                                                                                       |                            |                        |                        |
| 12 |                                                                                         |                                                                                                                                                       |                            |                        |                        |
| 13 | 1                                                                                       | ACE gene polymorphism in Turkish children with nephrotic syndrome.                                                                                    | Celik US et al.            | 16825089               | Paediatric individuals |
| 14 |                                                                                         |                                                                                                                                                       |                            |                        |                        |
| 15 | 1                                                                                       | Roles of paraoxonase and oxidative stress in adolescents with uraemic, essential or obesity-induced hypertension.                                     | Barath A et al.            | 16912512               | Paediatric individuals |
| 16 |                                                                                         |                                                                                                                                                       |                            |                        |                        |
| 17 | 1                                                                                       | Endothelial nitric oxide synthase gene intron 4 a/b VNTR polymorphism in children with APSGN.                                                         | Dursun H et al.            | 16941147               | Paediatric individuals |
| 18 |                                                                                         |                                                                                                                                                       |                            |                        |                        |
| 19 | 1                                                                                       | Bardet-Biedl syndrome gene variants are associated with both childhood and adult common obesity in French Caucasians.                                 | Benzinou M et al.          | 17003356               | Paediatric individuals |
| 20 |                                                                                         |                                                                                                                                                       |                            |                        |                        |
| 21 | 1                                                                                       | HLA class II influences humoral autoimmunity in patients with type 2 autoimmune hepatitis.                                                            | Djilali-Saiah et al.       | 17050030               | Paediatric individuals |
| 22 |                                                                                         |                                                                                                                                                       |                            |                        |                        |
| 23 | 1                                                                                       | Nitric oxide synthase gene polymorphisms in children with primary nocturnal enuresis: a preliminary study.                                            | Balat A et al.             | 17365914               | Paediatric individuals |
| 24 |                                                                                         |                                                                                                                                                       |                            |                        |                        |
| 25 | 1                                                                                       | Molecular and functional characterization of novel glycerol-3-phosphate dehydrogenase 1 like gene (GPD1-L) mutations in sudden infant death syndrome. | Van Norstrand DW et al.    | 17967976               | Paediatric individuals |
| 26 |                                                                                         |                                                                                                                                                       |                            |                        |                        |
| 27 | 1                                                                                       | Sudden infant death syndrome and activating GNAS1 gene mutations.                                                                                     | Roman R et al.             | 18075835               | Paediatric individuals |
| 28 |                                                                                         |                                                                                                                                                       |                            |                        |                        |
| 29 | 1                                                                                       | Endothelial nitric oxide synthase gene T-786C and 27-bp repeat gene polymorphisms in retinopathy of prematurity.                                      | Rusai K et al.             | 18334945               | Paediatric individuals |
| 30 |                                                                                         |                                                                                                                                                       |                            |                        |                        |
| 31 | 1                                                                                       | Loss of nephrocystin-3 function can cause embryonic lethality, Meckel-Gruber-like syndrome, situs inversus, and renal-hepatic-pancreatic dysplasia.   | Bergmann C et al.          | 18371931               | Paediatric individuals |
| 32 |                                                                                         |                                                                                                                                                       |                            |                        |                        |
| 33 | 1                                                                                       | The polymorphism in insulin receptor substrate-1 gene and birth weight in neonates at term.                                                           | Simonska-Cichocka E et al. | 18615395               | Paediatric individuals |
| 34 |                                                                                         |                                                                                                                                                       |                            |                        |                        |
| 35 |                                                                                         |                                                                                                                                                       |                            |                        |                        |
| 36 |                                                                                         |                                                                                                                                                       |                            |                        |                        |
| 37 |                                                                                         |                                                                                                                                                       |                            |                        |                        |
| 38 |                                                                                         |                                                                                                                                                       |                            |                        |                        |
| 39 |                                                                                         |                                                                                                                                                       |                            |                        |                        |
| 40 |                                                                                         |                                                                                                                                                       |                            |                        |                        |
| 41 |                                                                                         |                                                                                                                                                       |                            |                        |                        |
| 42 |                                                                                         |                                                                                                                                                       |                            |                        |                        |
| 43 |                                                                                         |                                                                                                                                                       |                            |                        |                        |
| 44 |                                                                                         |                                                                                                                                                       |                            |                        |                        |
| 45 |                                                                                         |                                                                                                                                                       |                            |                        |                        |
| 46 |                                                                                         |                                                                                                                                                       |                            |                        |                        |

|    |                                                                                                                                        |                                                                                                                                                                 |                     |                        |                        |
|----|----------------------------------------------------------------------------------------------------------------------------------------|-----------------------------------------------------------------------------------------------------------------------------------------------------------------|---------------------|------------------------|------------------------|
| 1  | Report of a family segregating mutations in both the APC and MSH2 genes: juvenile onset of colorectal cancer in a double heterozygote. | Uhrhammer N et al.                                                                                                                                              | 18629513            | Paediatric individuals |                        |
| 2  |                                                                                                                                        |                                                                                                                                                                 |                     |                        |                        |
| 3  |                                                                                                                                        |                                                                                                                                                                 |                     |                        |                        |
| 4  | 1                                                                                                                                      | ACE gene polymorphism in Egyptian children with idiopathic nephrotic syndrome.                                                                                  | Fahmy ME et al.     | 18792483               | Paediatric individuals |
| 5  |                                                                                                                                        |                                                                                                                                                                 |                     |                        |                        |
| 6  |                                                                                                                                        |                                                                                                                                                                 |                     |                        |                        |
| 7  | 1                                                                                                                                      | A common RET variant is associated with reduced newborn kidney size and function.                                                                               | Zhang Z et al.      | 18820179               | Paediatric individuals |
| 8  |                                                                                                                                        |                                                                                                                                                                 |                     |                        |                        |
| 9  | 1                                                                                                                                      | Activation of the AKT/mTOR pathway in autosomal recessive polycystic kidney disease (ARPKD).                                                                    | Fischer DC et al.   | 19176689               | Paediatric individuals |
| 10 |                                                                                                                                        |                                                                                                                                                                 |                     |                        |                        |
| 11 | 1                                                                                                                                      | Mutations of NPHP2 and NPHP3 in infantile nephronophthisis.                                                                                                     | Tory K et al.       | 19177160               | Paediatric individuals |
| 12 |                                                                                                                                        |                                                                                                                                                                 |                     |                        |                        |
| 13 | 1                                                                                                                                      | Lethal cystic kidney disease in Amish neonates associated with homozygous nonsense mutation of NPHP3.                                                           | Simpson MA et al.   | 19303681               | Paediatric individuals |
| 14 |                                                                                                                                        |                                                                                                                                                                 |                     |                        |                        |
| 15 | 1                                                                                                                                      | Nitric oxide synthase gene polymorphisms in children with minimal change nephrotic syndrome.                                                                    | Alasehirli B et al. | 19371282               | Paediatric individuals |
| 16 |                                                                                                                                        |                                                                                                                                                                 |                     |                        |                        |
| 17 | 1                                                                                                                                      | ACE gene insertion/deletion polymorphism and renal scarring in children with urinary tract infections.                                                          | Sekerli E et al.    | 19603195               | Paediatric individuals |
| 18 |                                                                                                                                        |                                                                                                                                                                 |                     |                        |                        |
| 19 | 1                                                                                                                                      | Effect of paraoxonase 1 gene polymorphisms on clinical course of Henoch-Schönlein purpura.                                                                      | Yilmaz A et al.     | 19967651               | Paediatric individuals |
| 20 |                                                                                                                                        |                                                                                                                                                                 |                     |                        |                        |
| 21 | 1                                                                                                                                      | Hypophosphatemia, hyperphosphaturia, and bisphosphonate treatment are associated with survival beyond infancy in generalized arterial calcification of infancy. | Rutsch F et al.     | 20016754               | Paediatric individuals |
| 22 |                                                                                                                                        |                                                                                                                                                                 |                     |                        |                        |
| 23 | 1                                                                                                                                      | Changes in glomerular mesangium in kidneys with congenital nephrotic syndrome of the Finnish type.                                                              | Kaukinen A et al.   | 20020158               | Paediatric individuals |
| 24 |                                                                                                                                        |                                                                                                                                                                 |                     |                        |                        |
| 25 | 1                                                                                                                                      | Polymorphisms of the TNF-alpha and ACE genes, and renal scarring in infants with urinary tract infection.                                                       | Savidou A et al.    | 20022049               | Paediatric individuals |
| 26 |                                                                                                                                        |                                                                                                                                                                 |                     |                        |                        |
| 27 | 1                                                                                                                                      | Genetic polymorphisms of 17 $\beta$ -hydroxysteroid dehydrogenase 3 and the risk of hypospadias.                                                                | Sata F et al.       | 20059664               | Paediatric individuals |
| 28 |                                                                                                                                        |                                                                                                                                                                 |                     |                        |                        |
| 29 | 1                                                                                                                                      | Association of angiotensin converting enzyme and angiotensin type 2 receptor gene polymorphisms with renal damage in posterior urethral valves.                 | Laksmi NK et al.    | 20149750               | Paediatric individuals |
| 30 |                                                                                                                                        |                                                                                                                                                                 |                     |                        |                        |
| 31 | 1                                                                                                                                      | Glutathione S-transferase T1-null seems to be associated with graft failure in hematopoietic SCT.                                                               | Elhasid R et al.    | 20348973               | Paediatric individuals |
| 32 |                                                                                                                                        |                                                                                                                                                                 |                     |                        |                        |
| 33 |                                                                                                                                        |                                                                                                                                                                 |                     |                        |                        |
| 34 |                                                                                                                                        |                                                                                                                                                                 |                     |                        |                        |
| 35 |                                                                                                                                        |                                                                                                                                                                 |                     |                        |                        |
| 36 |                                                                                                                                        |                                                                                                                                                                 |                     |                        |                        |
| 37 |                                                                                                                                        |                                                                                                                                                                 |                     |                        |                        |
| 38 |                                                                                                                                        |                                                                                                                                                                 |                     |                        |                        |
| 39 |                                                                                                                                        |                                                                                                                                                                 |                     |                        |                        |
| 40 |                                                                                                                                        |                                                                                                                                                                 |                     |                        |                        |
| 41 |                                                                                                                                        |                                                                                                                                                                 |                     |                        |                        |
| 42 |                                                                                                                                        |                                                                                                                                                                 |                     |                        |                        |
| 43 |                                                                                                                                        |                                                                                                                                                                 |                     |                        |                        |
| 44 |                                                                                                                                        |                                                                                                                                                                 |                     |                        |                        |
| 45 |                                                                                                                                        |                                                                                                                                                                 |                     |                        |                        |
| 46 |                                                                                                                                        |                                                                                                                                                                 |                     |                        |                        |

|    |                                                                                                                            |                                                                                                                                                                           |                     |                        |                        |
|----|----------------------------------------------------------------------------------------------------------------------------|---------------------------------------------------------------------------------------------------------------------------------------------------------------------------|---------------------|------------------------|------------------------|
| 1  | Linkage and association study of discoidin domain receptor 1 as a novel susceptibility gene for childhood IgA nephropathy. | Hahn WH et al.                                                                                                                                                            | 20372823            | Paediatric individuals |                        |
| 2  |                                                                                                                            |                                                                                                                                                                           |                     |                        |                        |
| 3  |                                                                                                                            |                                                                                                                                                                           |                     |                        |                        |
| 4  |                                                                                                                            |                                                                                                                                                                           |                     |                        |                        |
| 5  |                                                                                                                            |                                                                                                                                                                           |                     |                        |                        |
| 6  | 1                                                                                                                          | Effect of angiotensin-converting enzyme gene insertion/deletion polymorphism on steroid resistance in Egyptian children with idiopathic nephrotic syndrome.               | Saber-Ayad M et al. | 20418353               | Paediatric individuals |
| 7  |                                                                                                                            |                                                                                                                                                                           |                     |                        |                        |
| 8  |                                                                                                                            |                                                                                                                                                                           |                     |                        |                        |
| 9  | 1                                                                                                                          | Phosphodiesterase-5 gene (PDE5A) polymorphisms are associated with progression of childhood IgA nephropathy.                                                              | Hahn WH et al.      | 20563733               | Paediatric individuals |
| 10 |                                                                                                                            |                                                                                                                                                                           |                     |                        |                        |
| 11 | 1                                                                                                                          | Mutational analysis of the PLCE1 gene in steroid resistant nephrotic syndrome.                                                                                            | Boyer O et al.      | 20591883               | Paediatric individuals |
| 12 |                                                                                                                            |                                                                                                                                                                           |                     |                        |                        |
| 13 |                                                                                                                            |                                                                                                                                                                           |                     |                        |                        |
| 14 | 1                                                                                                                          | The association of genetic variability in patatin-like phospholipase domain-containing protein 3 (PNPLA3) with histological severity of nonalcoholic fatty liver disease. | Rotman Y et al.     | 20684021               | Paediatric individuals |
| 15 |                                                                                                                            |                                                                                                                                                                           |                     |                        |                        |
| 16 | 1                                                                                                                          | Founder mutations in the ATP6V1B1 gene explain most Cypriot cases of distal renal tubular acidosis: first prenatal diagnosis.                                             | Elia A et al.       | 20805693               | Paediatric individuals |
| 17 |                                                                                                                            |                                                                                                                                                                           |                     |                        |                        |
| 18 | 1                                                                                                                          | Polymorphisms of insulin-like growth factor-1 (IGF-1) and IGF-1 receptor (IGF-1R) contribute to pathologic progression in childhood IgA nephropathy.                      | Hahn WH et al.      | 21047277               | Paediatric individuals |
| 19 |                                                                                                                            |                                                                                                                                                                           |                     |                        |                        |
| 20 | 1                                                                                                                          | Renal manifestations of patients with MYH9-related disorders.                                                                                                             | Han KH et al.       | 21210153               | Paediatric individuals |
| 21 |                                                                                                                            |                                                                                                                                                                           |                     |                        |                        |
| 22 | 1                                                                                                                          | Clinical utility of genetic testing in children and adults with steroid-resistant nephrotic syndrome.                                                                     | Santin S et al.     | 21415313               | Paediatric individuals |
| 23 |                                                                                                                            |                                                                                                                                                                           |                     |                        |                        |
| 24 | 1                                                                                                                          | Induction of podocyte-derived VEGF ameliorates podocyte injury and subsequent abnormal glomerular development caused by puromycin aminonucleoside.                        | Ma J et al.         | 21451433               | Paediatric individuals |
| 25 |                                                                                                                            |                                                                                                                                                                           |                     |                        |                        |
| 26 | 1                                                                                                                          | ADAMTS13 gene mutations in children with hemolytic uremic syndrome.                                                                                                       | Choi HS et al.      | 21488199               | Paediatric individuals |
| 27 |                                                                                                                            |                                                                                                                                                                           |                     |                        |                        |
| 28 | 1                                                                                                                          | RET and GDNF mutations are rare in fetuses with renal agenesis or other severe kidney development defects.                                                                | Jeanpierre C et al. | 21490379               | Paediatric individuals |
| 29 |                                                                                                                            |                                                                                                                                                                           |                     |                        |                        |
| 30 | 1                                                                                                                          | Endothelial nitric oxide synthase gene intron4 VNTR polymorphism in patients with chronic kidney disease.                                                                 | Elshamaa MF et al.  | 21519233               | Paediatric individuals |
| 31 |                                                                                                                            |                                                                                                                                                                           |                     |                        |                        |
| 32 | 1                                                                                                                          | Disruption of PTPRO causes childhood-onset nephrotic syndrome.                                                                                                            | Ozaltin F et al.    | 21722858               | Paediatric individuals |
| 33 |                                                                                                                            |                                                                                                                                                                           |                     |                        |                        |
| 34 |                                                                                                                            |                                                                                                                                                                           |                     |                        |                        |
| 35 |                                                                                                                            |                                                                                                                                                                           |                     |                        |                        |
| 36 |                                                                                                                            |                                                                                                                                                                           |                     |                        |                        |
| 37 |                                                                                                                            |                                                                                                                                                                           |                     |                        |                        |
| 38 |                                                                                                                            |                                                                                                                                                                           |                     |                        |                        |
| 39 |                                                                                                                            |                                                                                                                                                                           |                     |                        |                        |
| 40 |                                                                                                                            |                                                                                                                                                                           |                     |                        |                        |
| 41 |                                                                                                                            |                                                                                                                                                                           |                     |                        |                        |
| 42 |                                                                                                                            |                                                                                                                                                                           |                     |                        |                        |
| 43 |                                                                                                                            |                                                                                                                                                                           |                     |                        |                        |
| 44 |                                                                                                                            |                                                                                                                                                                           |                     |                        |                        |
| 45 |                                                                                                                            |                                                                                                                                                                           |                     |                        |                        |
| 46 |                                                                                                                            |                                                                                                                                                                           |                     |                        |                        |

|    |                                                                                                               |                                                                                                                                                                            |                      |                        |                        |
|----|---------------------------------------------------------------------------------------------------------------|----------------------------------------------------------------------------------------------------------------------------------------------------------------------------|----------------------|------------------------|------------------------|
| 1  | Age and CYP3A5 genotype affect tacrolimus dosing requirements after transplant in pediatric heart recipients. | Gijsen V et al.                                                                                                                                                            | 21930396             | Paediatric individuals |                        |
| 2  |                                                                                                               |                                                                                                                                                                            |                      |                        |                        |
| 3  |                                                                                                               |                                                                                                                                                                            |                      |                        |                        |
| 4  | 1                                                                                                             | DD genotype of ACE gene in boys: may it be a risk factor for minimal change nephrotic syndrome?                                                                            | Alasehirli B et al.  | 22017506               | Paediatric individuals |
| 5  |                                                                                                               |                                                                                                                                                                            |                      |                        |                        |
| 6  | 1                                                                                                             | Association of the ACE-II genotype with the risk of nephrotic syndrome in Pakistani children.                                                                              | Shahid S et al.      | 22033511               | Paediatric individuals |
| 7  |                                                                                                               |                                                                                                                                                                            |                      |                        |                        |
| 8  | 1                                                                                                             | C1GALT1 polymorphisms are associated with Henoch-Schönlein purpura nephritis.                                                                                              | He X et al.          | 22544166               | Paediatric individuals |
| 9  |                                                                                                               |                                                                                                                                                                            |                      |                        |                        |
| 10 | 1                                                                                                             | Genes in the ureteric budding pathway: association study on vesico-ureteral reflux patients.                                                                               | van Eerde AM et al.  | 22558067               | Paediatric individuals |
| 11 |                                                                                                               |                                                                                                                                                                            |                      |                        |                        |
| 12 | 1                                                                                                             | Genetic polymorphisms influence the steroid treatment of children with idiopathic nephrotic syndrome.                                                                      | Chiou YH et al.      | 22610055               | Paediatric individuals |
| 13 |                                                                                                               |                                                                                                                                                                            |                      |                        |                        |
| 14 | 1                                                                                                             | Mutations in NEK8 link multiple organ dysplasia with altered Hippo signalling and increased c-MYC expression.                                                              | Frank V et al.       | 23418306               | Paediatric individuals |
| 15 |                                                                                                               |                                                                                                                                                                            |                      |                        |                        |
| 16 | 1                                                                                                             | Association of eNOS gene intron 4 a/b VNTR polymorphisms in children with nephrotic syndrome.                                                                              | Dursun H et al.      | 23570878               | Paediatric individuals |
| 17 |                                                                                                               |                                                                                                                                                                            |                      |                        |                        |
| 18 | 1                                                                                                             | A molecular genetic analysis of childhood nephrotic syndrome in a cohort of Saudi Arabian families.                                                                        | Al-Hamed MH et al.   | 23595123               | Paediatric individuals |
| 19 |                                                                                                               |                                                                                                                                                                            |                      |                        |                        |
| 20 | 1                                                                                                             | Cost-effective PKHD1 genetic testing for autosomal recessive polycystic kidney disease.                                                                                    | Krall P et al.       | 24162162               | Paediatric individuals |
| 21 |                                                                                                               |                                                                                                                                                                            |                      |                        |                        |
| 22 | 1                                                                                                             | EIF2AK3 mutations in South Indian children with permanent neonatal diabetes mellitus associated with Wolcott-Rallison syndrome.                                            | Jahnavi S et al.     | 24168455               | Paediatric individuals |
| 23 |                                                                                                               |                                                                                                                                                                            |                      |                        |                        |
| 24 | 1                                                                                                             | Molecular diagnosis of distal renal tubular acidosis in Tunisian patients: proposed algorithm for Northern Africa populations for the ATP6V1B1, ATP6V0A4 and SCL4A1 genes. | Elhayek D et al.     | 24252324               | Paediatric individuals |
| 25 |                                                                                                               |                                                                                                                                                                            |                      |                        |                        |
| 26 | 1                                                                                                             | MMP-1 and -3 haplotype is associated with congenital anomalies of the kidney and urinary tract.                                                                            | Djuric T et al.      | 24414606               | Paediatric individuals |
| 27 |                                                                                                               |                                                                                                                                                                            |                      |                        |                        |
| 28 | 1                                                                                                             | Mutation screening and array comparative genomic hybridization using a 180K oligonucleotide array in VACTERL association.                                                  | Winberg J et al.     | 24416387               | Paediatric individuals |
| 29 |                                                                                                               |                                                                                                                                                                            |                      |                        |                        |
| 30 | 1                                                                                                             | Conversion from twice- to once-daily tacrolimus in pediatric kidney recipients: a pharmacokinetic and bioequivalence study.                                                | Lapeyraque AL et al. | 24435759               | Paediatric individuals |
| 31 |                                                                                                               |                                                                                                                                                                            |                      |                        |                        |
| 32 |                                                                                                               |                                                                                                                                                                            |                      |                        |                        |
| 33 |                                                                                                               |                                                                                                                                                                            |                      |                        |                        |
| 34 |                                                                                                               |                                                                                                                                                                            |                      |                        |                        |
| 35 |                                                                                                               |                                                                                                                                                                            |                      |                        |                        |
| 36 |                                                                                                               |                                                                                                                                                                            |                      |                        |                        |
| 37 |                                                                                                               |                                                                                                                                                                            |                      |                        |                        |
| 38 |                                                                                                               |                                                                                                                                                                            |                      |                        |                        |
| 39 |                                                                                                               |                                                                                                                                                                            |                      |                        |                        |
| 40 |                                                                                                               |                                                                                                                                                                            |                      |                        |                        |
| 41 |                                                                                                               |                                                                                                                                                                            |                      |                        |                        |
| 42 |                                                                                                               |                                                                                                                                                                            |                      |                        |                        |
| 43 |                                                                                                               |                                                                                                                                                                            |                      |                        |                        |
| 44 |                                                                                                               |                                                                                                                                                                            |                      |                        |                        |
| 45 |                                                                                                               |                                                                                                                                                                            |                      |                        |                        |
| 46 |                                                                                                               |                                                                                                                                                                            |                      |                        |                        |



|    |   |                                                                                                                                                                    |                       |          |                        |
|----|---|--------------------------------------------------------------------------------------------------------------------------------------------------------------------|-----------------------|----------|------------------------|
| 1  | 1 | Muscle involvement in Dent disease 2.                                                                                                                              | Park E et al.         | 24912603 | Paediatric individuals |
| 2  | 1 | PON1 Q192R polymorphism (rs662) is associated with childhood embryonal tumors.                                                                                     | Vasconcelos GM et al. | 24972570 | Paediatric individuals |
| 3  | 1 | Genetic analysis of strictly defined Leber congenital amaurosis with (and without) neurodevelopmental delay.                                                       | Khan AO et al.        | 24997176 | Paediatric individuals |
| 4  | 1 | Modification of epigenetic patterns in low birth weight children: importance of hypomethylation of the ACE gene promoter.                                          | Rangel M et al.       | 25170764 | Paediatric individuals |
| 5  | 1 | Gene polymorphisms of adducin GLY460TRP, ACE I/D, AND AGT M235T in pediatric hypertension patients.                                                                | Kaplan I et al.       | 25262176 | Paediatric individuals |
| 6  | 1 | Endothelial nitric oxide synthase gene intron 4 VNTR polymorphism in sickle cell disease: relation to vasculopathy and disease severity.                           | Tantawy AA et al.     | 25263931 | Paediatric individuals |
| 7  | 1 | HLA-DQA1 and PLCG2 Are Candidate Risk Loci for Childhood-Onset Steroid-Sensitive Nephrotic Syndrome.                                                               | Gbadegesin RA et al.  | 25349203 | Paediatric individuals |
| 8  | 1 | Activation of human telomerase reverse transcriptase through gene fusion in clear cell sarcoma of the kidney.                                                      | Karlsson J et al.     | 25481751 | Paediatric individuals |
| 9  | 1 | Coinheritance of COL4A5 and MYO1E mutations accentuate the severity of kidney disease.                                                                             | Lennon R et al.       | 25739341 | Paediatric individuals |
| 10 | 1 | Novel carboxypeptidase A6 (CPA6) mutations identified in patients with juvenile myoclonic and generalized epilepsy.                                                | Sapio MR et al.       | 25875328 | Paediatric individuals |
| 11 | 1 | HPSE2 mutations in urofacial syndrome, non-neurogenic neurogenic bladder and lower urinary tract dysfunction.                                                      | Bulum B et al.        | 25924634 | Paediatric individuals |
| 12 | 1 | Impact of common functional polymorphisms in renin angiotensin system genes on the risk of renal parenchymal scarring following childhood urinary tract infection. | Hussein A et al.      | 25939993 | Paediatric individuals |
| 13 | 1 | Angiotensin-converting enzyme genotype is not a significant genetic risk factor for idiopathic nephrotic syndrome in Croatian children.                            | Batinic D et al.      | 25997642 | Paediatric individuals |
| 14 | 1 | BRAF mutations in pediatric metanephric tumors.                                                                                                                    | Chami R et al.        | 26014474 | Paediatric individuals |
| 15 | 1 | Expressions of mRNA for innate immunity-associated functional molecules in urinary sediment in immunoglobulin A nephropathy.                                       | Tsuruga K et al.      | 26058859 | Paediatric individuals |



|    |   |                                                                                                                                                                            |                              |          |                        |
|----|---|----------------------------------------------------------------------------------------------------------------------------------------------------------------------------|------------------------------|----------|------------------------|
| 1  | 1 | Association of ACE and MDR1 Gene Polymorphisms with Steroid Resistance in Children with Idiopathic Nephrotic Syndrome.                                                     | Dhandapani MC et al.         | 26154535 | Paediatric individuals |
| 2  | 1 | Inflammasome polymorphisms in juvenile systemic lupus erythematosus.                                                                                                       | Pontillo A et al.            | 26182076 | Paediatric individuals |
| 3  | 1 | Associations of the eNOS G894T gene polymorphism with target organ damage in children with newly diagnosed primary hypertension.                                           | Sladowska-Kozłowska J et al. | 26227630 | Paediatric individuals |
| 4  | 1 | Paraoxnase1 Gene Polymorphism in Childhood Idiopathic Nephrotic Syndrome.                                                                                                  | Al-Eisa AA et al.            | 26780374 | Paediatric individuals |
| 5  | 1 | Coagulation, thrombophilia and patency of arteriovenous fistula in children undergoing haemodialysis compared with healthy volunteers: a prospective analysis.             | Fadel FI et al.              | 26829282 | Paediatric individuals |
| 6  | 1 | Components of the lectin pathway of complement activation in paediatric patients of intensive care units.                                                                  | Swierzko AS et al.           | 26850322 | Paediatric individuals |
| 7  | 1 | ACE serum level and I/D gene polymorphism in children with obstructive uropathies and other congenital anomalies of the kidney and urinary tract.                          | Kostadinova ES et al.        | 27206329 | Paediatric individuals |
| 8  | 1 | Association study between matrix metalloproteinase-9 gene (MMP9) polymorphisms and the risk of Henoch-Schönlein purpura in children.                                       | Xu ED et al.                 | 27323137 | Paediatric individuals |
| 9  | 1 | Clinicopathological features and BRAF(V600E) mutations in patients with isolated hypothalamic-pituitary Langerhans cell histiocytosis.                                     | Huo Z et al.                 | 27760550 | Paediatric individuals |
| 10 | 1 | BRAF exon 15 mutations in pediatric renal stromal tumors: prevalence in metanephric stromal tumors.                                                                        | Marsden L et al.             | 27769870 | Paediatric individuals |
| 11 | 1 | Angiotensin-converting enzyme insertion/deletion gene polymorphism in Egyptian children with systemic lupus erythematosus: a possible relation to proliferative nephritis. | Hammad A et al.              | 27956582 | Paediatric individuals |
| 12 | 1 | Estimation of the relationship between the polymorphisms of selected genes: ACE, AGTR1, TGF $\beta$ 21 and GNB3 with the occurrence of primary vesicoureteral reflux.      | Zyczkowski M et al.          | 27988909 | Paediatric individuals |
| 13 | 1 | Spectrum of mutations in Chinese children with steroid-resistant nephrotic syndrome.                                                                                       | Wang F et al.                | 28204945 | Paediatric individuals |
| 14 | 1 | Lectin pathway factors in patients suffering from juvenile idiopathic arthritis.                                                                                           | Kasperkiewicz K et al.       | 28405017 | Paediatric individuals |

|    |                                                                                                                                                                                                                                                              |                       |          |                           |
|----|--------------------------------------------------------------------------------------------------------------------------------------------------------------------------------------------------------------------------------------------------------------|-----------------------|----------|---------------------------|
| 1  | Association of Endothelial Nitric Oxide Synthase Gene Polymorphism with Susceptibility and Nephritis Development of Henoch-Schönlein Purpura in Chinese Han Children.                                                                                        | Wang A et al.         | 28409662 | Paediatric individuals    |
| 2  |                                                                                                                                                                                                                                                              |                       |          |                           |
| 3  |                                                                                                                                                                                                                                                              |                       |          |                           |
| 4  |                                                                                                                                                                                                                                                              |                       |          |                           |
| 5  |                                                                                                                                                                                                                                                              |                       |          |                           |
| 6  |                                                                                                                                                                                                                                                              |                       |          |                           |
| 7  | Angiotensin-Converting Enzyme Gene Polymorphism in Children with Idiopathic Nephrotic Syndrome, Effect on Biopsy Findings.                                                                                                                                   | Monajemzadeh M et al. | 28481137 | Paediatric individuals    |
| 8  |                                                                                                                                                                                                                                                              |                       |          |                           |
| 9  | Inducible nitric oxide synthase gene polymorphisms are associated with a risk of nephritis in Henoch-Schönlein purpura children.                                                                                                                             | Jiang J et al.        | 28593405 | Paediatric individuals    |
| 10 |                                                                                                                                                                                                                                                              |                       |          |                           |
| 11 | Inborn errors in RNA polymerase III underlie severe varicella zoster virus infections.                                                                                                                                                                       | Ogunjimi B et al.     | 28783042 | Paediatric individuals    |
| 12 |                                                                                                                                                                                                                                                              |                       |          |                           |
| 13 |                                                                                                                                                                                                                                                              |                       |          |                           |
| 14 | Association of single-nucleotide polymorphism in the FKBP5 gene with response to steroids in pediatric patients with primary nephrotic syndrome.                                                                                                             | Du N et al.           | 28992850 | Paediatric individuals    |
| 15 |                                                                                                                                                                                                                                                              |                       |          |                           |
| 16 |                                                                                                                                                                                                                                                              |                       |          |                           |
| 17 | Monogenic diabetes in overweight and obese youth diagnosed with type 2 diabetes: the TODAY clinical trial.                                                                                                                                                   | Kleinberger JW et al. | 29758564 | Paediatric individuals    |
| 18 |                                                                                                                                                                                                                                                              |                       |          |                           |
| 19 |                                                                                                                                                                                                                                                              |                       |          |                           |
| 20 | Evaluation of Genetic Polymorphisms for Determining Steroid Response in Nephrotic Children.                                                                                                                                                                  | Kara A et al.         | 30143489 | Paediatric individuals    |
| 21 |                                                                                                                                                                                                                                                              |                       |          |                           |
| 22 | A randomized clinical trial of age and genotype-guided tacrolimus dosing after pediatric solid organ transplantation.                                                                                                                                        | Min S et al.          | 30178515 | Paediatric individuals    |
| 23 |                                                                                                                                                                                                                                                              |                       |          |                           |
| 24 | Pharmacogenetics of acute azathioprine toxicity: relationship to thiopurine methyltransferase genetic polymorphism.                                                                                                                                          | Lennard L et al.      | 2758725  | Pharmaceutical drug focus |
| 25 |                                                                                                                                                                                                                                                              |                       |          |                           |
| 26 | Genetic association of 11 beta-hydroxysteroid dehydrogenase type 2 (HSD11B2) flanking microsatellites with essential hypertension in blacks.                                                                                                                 | Watson B Jr et al.    | 8794836  | Pharmaceutical drug focus |
| 27 |                                                                                                                                                                                                                                                              |                       |          |                           |
| 28 | Effect of deletion polymorphism of angiotensin converting enzyme gene on progression of diabetic nephropathy during inhibition of angiotensin converting enzyme: observational follow up study.                                                              | Parving HH et al.     | 8806248  | Pharmaceutical drug focus |
| 29 |                                                                                                                                                                                                                                                              |                       |          |                           |
| 30 | Effect of angiotensin-converting enzyme (ACE) gene polymorphism on progression of renal disease and the influence of ACE inhibition in IDDM patients: findings from the EUCLID Randomized Controlled Trial. EURODIAB Controlled Trial of Lisinopril in IDDM. | Penno G et al.        | 9726242  | Pharmaceutical drug focus |
| 31 |                                                                                                                                                                                                                                                              |                       |          |                           |
| 32 |                                                                                                                                                                                                                                                              |                       |          |                           |
| 33 |                                                                                                                                                                                                                                                              |                       |          |                           |
| 34 |                                                                                                                                                                                                                                                              |                       |          |                           |
| 35 |                                                                                                                                                                                                                                                              |                       |          |                           |
| 36 |                                                                                                                                                                                                                                                              |                       |          |                           |
| 37 | Effects of erythropoietin, angiotensin II, and angiotensin-converting enzyme inhibitor on erythroid precursors in patients with posttransplantation erythrocytosis.                                                                                          | Glicklich D et al.    | 10428268 | Pharmaceutical drug focus |
| 38 |                                                                                                                                                                                                                                                              |                       |          |                           |
| 39 |                                                                                                                                                                                                                                                              |                       |          |                           |
| 40 |                                                                                                                                                                                                                                                              |                       |          |                           |
| 41 |                                                                                                                                                                                                                                                              |                       |          |                           |
| 42 |                                                                                                                                                                                                                                                              |                       |          |                           |
| 43 |                                                                                                                                                                                                                                                              |                       |          |                           |
| 44 |                                                                                                                                                                                                                                                              |                       |          |                           |
| 45 |                                                                                                                                                                                                                                                              |                       |          |                           |
| 46 |                                                                                                                                                                                                                                                              |                       |          |                           |

|    |   |                                                                                                                                                                   |                         |          |                           |
|----|---|-------------------------------------------------------------------------------------------------------------------------------------------------------------------|-------------------------|----------|---------------------------|
| 1  | 1 | Nifedipine improves endothelial function in hypercholesterolemia, independently of an effect on blood pressure or plasma lipids.                                  | Verhaar MC et al.       | 10533616 | Pharmaceutical drug focus |
| 2  | 1 | Pharmacogenetic analysis of the effect of angiotensin-converting enzyme inhibitor on restenosis after percutaneous transluminal coronary angioplasty.             | Okamura A et al.        | 10535720 | Pharmaceutical drug focus |
| 3  | 1 | The norbornenyl moiety of cyclothiazide determines the preference for flip-flop variants of AMPA receptor subunits.                                               | Kessler M et al.        | 10854736 | Pharmaceutical drug focus |
| 4  | 1 | Randomized placebo-controlled trial of perindopril in normotensive, normoalbuminuric patients with type 1 diabetes mellitus.                                      | Kvetny J et al.         | 11181984 | Pharmaceutical drug focus |
| 5  | 1 | Human thiopurine S-methyltransferase activity in uremia and after renal transplantation.                                                                          | Weyer N et al.          | 11417444 | Pharmaceutical drug focus |
| 6  | 1 | Long-term renoprotective effects of losartan in diabetic nephropathy: interaction with ACE insertion/deletion genotype?                                           | Andersen S et al.       | 12716812 | Pharmaceutical drug focus |
| 7  | 1 | The influence of the ACE ( I/D) polymorphism on systemic and renal vascular responses to angiotensins in normotensive, normoalbuminuric Type 1 diabetes mellitus. | Luik PT et al.          | 12856080 | Pharmaceutical drug focus |
| 8  | 1 | Venous response to nitroglycerin is enhanced in young, healthy carriers of the 825T allele of the G protein beta3 subunit gene (GNB3).                            | Mitchell A et al.       | 14586390 | Pharmaceutical drug focus |
| 9  | 1 | Matrix metalloproteinase-1 gene polymorphism in renal transplant patients with and without gingival enlargement.                                                  | Kurzawski M et al.      | 16945025 | Pharmaceutical drug focus |
| 10 | 1 | Enalapril and losartan affect lipid peroxidation in renal transplant recipients with renin-angiotensin system polymorphisms.                                      | Rashtchizadeh N et al.  | 17222813 | Pharmaceutical drug focus |
| 11 | 1 | Renin-angiotensin system polymorphisms and hemoglobin level in renal allografts: a comparative study between losartan and enalapril.                              | Noroozianavval M et al. | 17524880 | Pharmaceutical drug focus |
| 12 | 1 | Genetic analysis of fluvastatin response and dyslipidemia in renal transplant recipients.                                                                         | Singer JB et al.        | 17563401 | Pharmaceutical drug focus |
| 13 | 1 | Impact of the preintervention rate of renal function decline on outcome of renoprotective intervention.                                                           | Lely AT et al.          | 18077786 | Pharmaceutical drug focus |
| 14 | 1 | CYP3A5 genotype is not associated with a higher risk of acute rejection in tacrolimus-treated renal transplant recipients.                                        | Hesselink DA et al.     | 18334918 | Pharmaceutical drug focus |
| 15 | 1 | Endothelial nitric oxide synthase gene polymorphisms and the renal hemodynamic response to L-arginine.                                                            | Cherney DZ et al.       | 19037250 | Pharmaceutical drug focus |

|    |                                                                                                                               |                                                                                                                                                                                               |                    |                           |                           |
|----|-------------------------------------------------------------------------------------------------------------------------------|-----------------------------------------------------------------------------------------------------------------------------------------------------------------------------------------------|--------------------|---------------------------|---------------------------|
| 1  | Modulating effect of atorvastatin on paraoxonase 1 activity in type 2 diabetic Egyptian patients with or without nephropathy. | Abdin AA et al.                                                                                                                                                                               | 19553142           | Pharmaceutical drug focus |                           |
| 2  |                                                                                                                               |                                                                                                                                                                                               |                    |                           |                           |
| 3  |                                                                                                                               |                                                                                                                                                                                               |                    |                           |                           |
| 4  |                                                                                                                               |                                                                                                                                                                                               |                    |                           |                           |
| 5  |                                                                                                                               |                                                                                                                                                                                               |                    |                           |                           |
| 6  | 1                                                                                                                             | CYP2C9 genotype and pharmacodynamic responses to losartan in patients with primary and secondary kidney diseases.                                                                             | Joy MS et al.      | 19669737                  | Pharmaceutical drug focus |
| 7  |                                                                                                                               |                                                                                                                                                                                               |                    |                           |                           |
| 8  | 1                                                                                                                             | Matrix metalloproteinase-3 gene polymorphism in renal transplant patients with gingival overgrowth.                                                                                           | Drozdik A et al.   | 19778329                  | Pharmaceutical drug focus |
| 9  |                                                                                                                               |                                                                                                                                                                                               |                    |                           |                           |
| 10 |                                                                                                                               |                                                                                                                                                                                               |                    |                           |                           |
| 11 | 1                                                                                                                             | Presence of CYP2C9*3 allele increases risk for hypoglycemia in Type 2 diabetic patients treated with sulfonylureas.                                                                           | Ragia G et al.     | 19891554                  | Pharmaceutical drug focus |
| 12 |                                                                                                                               |                                                                                                                                                                                               |                    |                           |                           |
| 13 | 1                                                                                                                             | Drug-resistant cytomegalovirus in transplant recipients: a French cohort study.                                                                                                               | Hantz S et al.     | 20961907                  | Pharmaceutical drug focus |
| 14 |                                                                                                                               |                                                                                                                                                                                               |                    |                           |                           |
| 15 | 1                                                                                                                             | CYP3A5 genotype does not influence everolimus in vitro metabolism and clinical pharmacokinetics in renal transplant recipients.                                                               | Picard N et al.    | 21389905                  | Pharmaceutical drug focus |
| 16 |                                                                                                                               |                                                                                                                                                                                               |                    |                           |                           |
| 17 | 1                                                                                                                             | Cytochrome P450 polymorphisms and the response of lupus nephritis to cyclophosphamide therapy.                                                                                                | Winoto J et al.    | 21543025                  | Pharmaceutical drug focus |
| 18 |                                                                                                                               |                                                                                                                                                                                               |                    |                           |                           |
| 19 | 1                                                                                                                             | Exaggerated natriuresis during clamping of systemic NO supply in healthy young men.                                                                                                           | Simonsen JA et al. | 21749320                  | Pharmaceutical drug focus |
| 20 |                                                                                                                               |                                                                                                                                                                                               |                    |                           |                           |
| 21 | 1                                                                                                                             | In vivo CYP3A activity is significantly lower in cyclosporine-treated as compared with tacrolimus-treated renal allograft recipients.                                                         | de Jonge H et al.  | 21753749                  | Pharmaceutical drug focus |
| 22 |                                                                                                                               |                                                                                                                                                                                               |                    |                           |                           |
| 23 | 1                                                                                                                             | Lack of association between the Trp719Arg polymorphism in kinesin-like protein-6 and cardiovascular risk and efficacy of atorvastatin among subjects with diabetes on dialysis: the 4D study. | Hoffmann MM et al. | 21871624                  | Pharmaceutical drug focus |
| 24 |                                                                                                                               |                                                                                                                                                                                               |                    |                           |                           |
| 25 | 1                                                                                                                             | Influence of NAT2 polymorphisms on sulfamethoxazole pharmacokinetics in renal transplant recipients.                                                                                          | Kagaya H et al.    | 22106207                  | Pharmaceutical drug focus |
| 26 |                                                                                                                               |                                                                                                                                                                                               |                    |                           |                           |
| 27 | 1                                                                                                                             | Comparing antihypertensive effect and plasma ciclosporin concentration between amlodipine and valsartan regimens in hypertensive renal transplant patients receiving ciclosporin therapy.     | Cai J et al.       | 22149319                  | Pharmaceutical drug focus |
| 28 |                                                                                                                               |                                                                                                                                                                                               |                    |                           |                           |
| 29 | 1                                                                                                                             | Genetic and clinical determinants of early, acute calcineurin inhibitor-related nephrotoxicity: results from a kidney transplant consortium.                                                  | Jacobson PA et al. | 22334041                  | Pharmaceutical drug focus |
| 30 |                                                                                                                               |                                                                                                                                                                                               |                    |                           |                           |
| 31 | 1                                                                                                                             | Risk of tacrolimus toxicity in CYP3A5 nonexpressors treated with intravenous nicardipine after kidney transplantation.                                                                        | Hooper DK et al.   | 22491658                  | Pharmaceutical drug focus |
| 32 |                                                                                                                               |                                                                                                                                                                                               |                    |                           |                           |
| 33 | 1                                                                                                                             | CYP3A5 polymorphism effect on cyclosporine pharmacokinetics in living donor renal transplant recipients: analysis by population pharmacokinetics.                                             | Song J et al.      | 22947591                  | Pharmaceutical drug focus |
| 34 |                                                                                                                               |                                                                                                                                                                                               |                    |                           |                           |
| 35 |                                                                                                                               |                                                                                                                                                                                               |                    |                           |                           |
| 36 |                                                                                                                               |                                                                                                                                                                                               |                    |                           |                           |
| 37 |                                                                                                                               |                                                                                                                                                                                               |                    |                           |                           |
| 38 |                                                                                                                               |                                                                                                                                                                                               |                    |                           |                           |
| 39 |                                                                                                                               |                                                                                                                                                                                               |                    |                           |                           |
| 40 |                                                                                                                               |                                                                                                                                                                                               |                    |                           |                           |
| 41 |                                                                                                                               |                                                                                                                                                                                               |                    |                           |                           |
| 42 |                                                                                                                               |                                                                                                                                                                                               |                    |                           |                           |
| 43 |                                                                                                                               |                                                                                                                                                                                               |                    |                           |                           |
| 44 |                                                                                                                               |                                                                                                                                                                                               |                    |                           |                           |
| 45 |                                                                                                                               |                                                                                                                                                                                               |                    |                           |                           |
| 46 |                                                                                                                               |                                                                                                                                                                                               |                    |                           |                           |

|    |   |                                                                                                                                                         |                     |          |                                  |
|----|---|---------------------------------------------------------------------------------------------------------------------------------------------------------|---------------------|----------|----------------------------------|
| 1  | 1 | Comparison of pharmacokinetics and pharmacogenetics of once- and twice-daily tacrolimus in the early stage after renal transplantation.                 | Nioka T et al.      | 23073468 | Pharmaceutical drug focus        |
| 2  | 1 | Impact of tacrolimus intraindividual variability and CYP3A5 genetic polymorphism on acute rejection in kidney transplantation.                          | Ro H et al.         | 23149441 | Pharmaceutical drug focus        |
| 3  | 1 | Endothelial nitric oxide synthase gene polymorphisms and renal responsiveness to RAS inhibition therapy in type 2 diabetic Asian Indians.               | Cheema BS et al.    | 23260854 | Pharmaceutical drug focus        |
| 4  | 1 | Individualization of tacrolimus dosage basing on cytochrome P450 3A5 polymorphism--a prospective, randomized, controlled study.                         | Chen SY et al.      | 23432535 | Pharmaceutical drug focus        |
| 5  | 1 | Genetic polymorphisms of UGT1A8, UGT1A9 and HNF-1 $\alpha$ and gastrointestinal symptoms in renal transplant recipients taking mycophenolic acid.       | Vu D et al.         | 23721685 | Pharmaceutical drug focus        |
| 6  | 1 | CYP2C9*2 allele increases risk for hypoglycemia in POR*1/*1 type 2 diabetic patients treated with sulfonylureas.                                        | Ragia G et al.      | 24464600 | Pharmaceutical drug focus        |
| 7  | 1 | Association of CYP3A4*18B and CYP3A5*3 polymorphism with cyclosporine-related liver injury in Chinese renal transplant recipients.                      | Xin HW et al.       | 24691060 | Pharmaceutical drug focus        |
| 8  | 1 | Genetic variance in ABCB1 and CYP3A5 does not contribute toward the development of chronic kidney disease after liver transplantation.                  | Tapirdamaz O et al. | 25014506 | Pharmaceutical drug focus        |
| 9  | 1 | Associations of HSD11B1 polymorphisms with tacrolimus concentrations in Chinese renal transplant recipients with prednisone combined therapy.           | Liu X et al.        | 25587129 | Pharmaceutical drug focus        |
| 10 | 3 | Impact of interaction of cigarette smoking with angiotensin-converting enzyme polymorphisms on end-stage renal disease risk in a Han Chinese population | Yang HY et al.      | 23477970 | < 3 populations reported per SNP |
| 11 | 3 | Polymorphisms in the gene encoding angiotensin I converting enzyme 2 and diabetic nephropathy                                                           | Frojdo S et al.     | 16211375 | < 3 populations reported per SNP |
| 12 | 3 | Investigation of ACE, ACE2 and AGTR1 genes for association with nephropathy in Type 1 diabetes mellitus.                                                | Currie D et al.     | 20854388 | < 3 populations reported per SNP |

**Supplementary Table S3c:** Excluded studies from the AGT search

\*Exclusion stage relates to the stage at which the article was removed as shown in the flow diagram (Supplementary Figure S1c)

| Exclusion Stage | Title                                                                                                                                                                                                  | Authors              | Pubmed ID or WoS ID if Pubmed ID not available | Reason                      |
|-----------------|--------------------------------------------------------------------------------------------------------------------------------------------------------------------------------------------------------|----------------------|------------------------------------------------|-----------------------------|
| 1               | Identification of potential candidate genes for hypertensive nephropathy based on gene expression profile                                                                                              | Chen Z et al.        | 27756246                                       | Gene expression based study |
| 1               | Defining Uremic Arterial Functional Abnormalities in Patients Recently Started on Haemodialysis: Combined In Vivo and Ex Vivo Assessment                                                               | Abushufa AM et al.   | 25546407                                       | No data for AGT             |
| 1               | Angiotensin I Converting Enzyme Gene Polymorphism in Type 2 Diabetes Mellitus with Nephropathy in Saudi Population                                                                                     | Alharbi SA et al.    | WOS:000415063100003                            | No data for AGT             |
| 1               | Clinical impact of an angiotensin I-converting enzyme insertion/deletion and kinin B2 receptor +9/-9 polymorphisms in the prognosis of renal transplantation                                           | Amorim CEN et al.    | 23362199                                       | No data for AGT             |
| 1               | Transforming growth factor beta and progression of renal disease                                                                                                                                       | August P et al.      | WOS:000185812000016                            | No data for AGT             |
| 1               | Associations of fractalkine receptor (CX3CR1) and CCR5 gene variants with hypertension, diabetes and atherosclerosis in chronic renal failure patients undergoing hemodialysis                         | Bagci B et al.       | 27118566                                       | No data for AGT             |
| 1               | Effect of ACE and AT-2 inhibitors on mortality and progression to microalbuminuria in a nested case-control study of diabetic nephropathy in diabetes mellitus type 2: results from the GENDIAN study. | Boger CA et al.      | 16961167                                       | No data for AGT             |
| 1               | The ras responsive transcription factor RREB1 is a novel candidate gene for type 2 diabetes associated end-stage kidney disease                                                                        | Bonomo JA et al.     | 25027322                                       | No data for AGT             |
| 1               | Angiotensin II type 1 receptor gene polymorphism in end-stage renal disease                                                                                                                            | Buraczyńska M et al. | 12187084                                       | No data for AGT             |

|    |                                                                                                                                          |                  |          |                 |
|----|------------------------------------------------------------------------------------------------------------------------------------------|------------------|----------|-----------------|
| 1  | Endothelial nitric oxide synthase gene polymorphisms and renal responsiveness to RAS inhibition therapy in type 2 diabetic Asian Indians | Cheema BS et al. | 23260854 | No data for AGT |
| 2  |                                                                                                                                          |                  |          |                 |
| 3  |                                                                                                                                          |                  |          |                 |
| 4  |                                                                                                                                          |                  |          |                 |
| 5  |                                                                                                                                          |                  |          |                 |
| 6  |                                                                                                                                          |                  |          |                 |
| 7  |                                                                                                                                          |                  |          |                 |
| 8  |                                                                                                                                          |                  |          |                 |
| 9  |                                                                                                                                          |                  |          |                 |
| 10 |                                                                                                                                          |                  |          |                 |
| 11 |                                                                                                                                          |                  |          |                 |
| 12 |                                                                                                                                          |                  |          |                 |
| 13 |                                                                                                                                          |                  |          |                 |
| 14 |                                                                                                                                          |                  |          |                 |
| 15 |                                                                                                                                          |                  |          |                 |
| 16 |                                                                                                                                          |                  |          |                 |
| 17 |                                                                                                                                          |                  |          |                 |
| 18 |                                                                                                                                          |                  |          |                 |
| 19 |                                                                                                                                          |                  |          |                 |
| 20 |                                                                                                                                          |                  |          |                 |
| 21 |                                                                                                                                          |                  |          |                 |
| 22 |                                                                                                                                          |                  |          |                 |
| 23 |                                                                                                                                          |                  |          |                 |
| 24 |                                                                                                                                          |                  |          |                 |
| 25 |                                                                                                                                          |                  |          |                 |
| 26 |                                                                                                                                          |                  |          |                 |
| 27 |                                                                                                                                          |                  |          |                 |
| 28 |                                                                                                                                          |                  |          |                 |
| 29 |                                                                                                                                          |                  |          |                 |
| 30 |                                                                                                                                          |                  |          |                 |
| 31 |                                                                                                                                          |                  |          |                 |
| 32 |                                                                                                                                          |                  |          |                 |
| 33 |                                                                                                                                          |                  |          |                 |
| 34 |                                                                                                                                          |                  |          |                 |
| 35 |                                                                                                                                          |                  |          |                 |
| 36 |                                                                                                                                          |                  |          |                 |
| 37 |                                                                                                                                          |                  |          |                 |
| 38 |                                                                                                                                          |                  |          |                 |
| 39 |                                                                                                                                          |                  |          |                 |
| 40 |                                                                                                                                          |                  |          |                 |
| 41 |                                                                                                                                          |                  |          |                 |
| 42 |                                                                                                                                          |                  |          |                 |
| 43 |                                                                                                                                          |                  |          |                 |
| 44 |                                                                                                                                          |                  |          |                 |
| 45 |                                                                                                                                          |                  |          |                 |
| 46 |                                                                                                                                          |                  |          |                 |



|    |                                                                                                                                                                      |                      |                     |                 |
|----|----------------------------------------------------------------------------------------------------------------------------------------------------------------------|----------------------|---------------------|-----------------|
| 1  | ACE gene polymorphism and serum ACE activity in Iranians type II diabetic patients with macroalbuminuria                                                             | Felehgari V et al.   | 20830509            | No data for AGT |
| 2  |                                                                                                                                                                      |                      |                     |                 |
| 3  |                                                                                                                                                                      |                      |                     |                 |
| 4  |                                                                                                                                                                      |                      |                     |                 |
| 5  |                                                                                                                                                                      |                      |                     |                 |
| 6  | 1 DNA polymorphisms in the ACE gene, serum ACE activity and the risk of nephropathy in insulin-dependent diabetes mellitus                                           | Freire MBS et al.    | 9794558             | No data for AGT |
| 7  |                                                                                                                                                                      |                      |                     |                 |
| 8  |                                                                                                                                                                      |                      |                     |                 |
| 9  | 1 Polymorphisms in the gene encoding angiotensin I converting enzyme 2 and diabetic nephropathy                                                                      | Frojdo S et al.      | 16211375            | No data for AGT |
| 10 |                                                                                                                                                                      |                      |                     |                 |
| 11 |                                                                                                                                                                      |                      |                     |                 |
| 12 | 1 Association of fibronectin Msp iv polymorphism and diabetic nephropathy susceptibility in Chinese Han population                                                   | Gao JX et al.        | 26045844            | No data for AGT |
| 13 |                                                                                                                                                                      |                      |                     |                 |
| 14 |                                                                                                                                                                      |                      |                     |                 |
| 15 | 1 Effects of erythropoietin, angiotensin II, and angiotensin-converting enzyme inhibitor on erythroid precursors in patients with posttransplantation erythrocytosis | Glicklich D et al.   | 10428268            | No data for AGT |
| 16 |                                                                                                                                                                      |                      |                     |                 |
| 17 |                                                                                                                                                                      |                      |                     |                 |
| 18 | 1 Association of Angiotensin converting Enzyme (ACE) gene polymorphism and diabetic nephropathy                                                                      | Golmohamadi T et al. | WOS:000242619000003 | No data for AGT |
| 19 |                                                                                                                                                                      |                      |                     |                 |
| 20 |                                                                                                                                                                      |                      |                     |                 |
| 21 | 1 Angiotensin I-converting enzyme gene polymorphisms: Relationship to nephropathy in patients with non-insulin dependent diabetes mellitus                           | Grzeszczak W et al.  | 9727375             | No data for AGT |
| 22 |                                                                                                                                                                      |                      |                     |                 |
| 23 |                                                                                                                                                                      |                      |                     |                 |
| 24 | 1 Susceptibility and progression of end stage renal disease are not associated with angiotensin II type 1 receptor gene polymorphism                                 | Hanna MOF et al.     | 25316403            | No data for AGT |
| 25 |                                                                                                                                                                      |                      |                     |                 |
| 26 |                                                                                                                                                                      |                      |                     |                 |
| 27 | 1 Polymorphism of the angiotensin I-converting enzyme gene in diabetic nephropathy in type II diabetic patients with proliferative retinopathy                       | Hanyu O et al.       | 9509566             | No data for AGT |
| 28 |                                                                                                                                                                      |                      |                     |                 |
| 29 |                                                                                                                                                                      |                      |                     |                 |
| 30 | 1 Angiotensin Converting Enzyme Insertion/Deletion gene polymorphism and genomic sequence in Diabetic Nephropathy                                                    | Haque SF et al.      | WOS:000300381000004 | No data for AGT |
| 31 |                                                                                                                                                                      |                      |                     |                 |
| 32 |                                                                                                                                                                      |                      |                     |                 |
| 33 | 1 The angiotensin I-converting enzyme (ACE) locus is strongly associated with age and duration of diabetes in patients with type I diabetes                          | Hibberd ML et al.    | 9025006             | No data for AGT |
| 34 |                                                                                                                                                                      |                      |                     |                 |
| 35 |                                                                                                                                                                      |                      |                     |                 |
| 36 | 1 Role of transforming growth factor beta-1 gene polymorphisms in the development of chronic allograft nephropathy in renal transplant recipients                    | Inigo P et al.       | 14558330            | No data for AGT |
| 37 |                                                                                                                                                                      |                      |                     |                 |
| 38 |                                                                                                                                                                      |                      |                     |                 |
| 39 |                                                                                                                                                                      |                      |                     |                 |
| 40 |                                                                                                                                                                      |                      |                     |                 |
| 41 |                                                                                                                                                                      |                      |                     |                 |
| 42 |                                                                                                                                                                      |                      |                     |                 |
| 43 |                                                                                                                                                                      |                      |                     |                 |
| 44 |                                                                                                                                                                      |                      |                     |                 |
| 45 |                                                                                                                                                                      |                      |                     |                 |
| 46 |                                                                                                                                                                      |                      |                     |                 |



|    |   |                                                                                                                                                                    |                     |                     |                 |
|----|---|--------------------------------------------------------------------------------------------------------------------------------------------------------------------|---------------------|---------------------|-----------------|
| 1  | 1 | Neuropeptide YY1 receptor polymorphism as a prognostic predictor in Japanese patients with IgA nephropathy                                                         | Ito H et al.        | 10363627            | No data for AGT |
| 2  | 1 | Carnosine as a protective factor in diabetic nephropathy - Association with a leucine repeat of the carnosinase gene CNDP1                                         | Janssen B et al.    | 16046297            | No data for AGT |
| 3  | 1 | Impact of Polymorphisms of the Genes Encoding Angiotensin II-Forming Enzymes on the Progression of IgA Nephropathy                                                 | Jung ES et al.      | 21150220            | No data for AGT |
| 4  | 1 | Proteomic analysis of alpha-1-antitrypsin in immunoglobulin A nephropathy                                                                                          | Kwak NJ et al.      | 21136694            | No data for AGT |
| 5  | 1 | Renal perfusion and the renal hemodynamic response to blocking the renin system in diabetes - Are the forces leading to vasodilation and vasoconstriction linked?  | Lansang MC et al.   | 12086929            | No data for AGT |
| 6  | 1 | Polymorphism in IgA nephropathy                                                                                                                                    | Liu ZH et al.       | WOS:A1997WW80600013 | No data for AGT |
| 7  | 1 | The angiotensin-I converting enzyme gene I/D variation contributes to end-stage renal disease risk in Chinese patients with type 2 diabetes receiving hemodialysis | Lu M et al.         | 27633502            | No data for AGT |
| 8  | 1 | The influence of three endothelin-1 polymorphisms on the progression of IgA nephropathy                                                                            | Maixnerova D et al. | 17328840            | No data for AGT |
| 9  | 1 | The influence of two megsin polymorphisms on the progression of IgA nephropathy                                                                                    | Maixnerova D et al. | 18498720            | No data for AGT |
| 10 | 1 | Relationships Between Angiotensin-I Converting-Enzyme Gene Polymorphism, Plasma-Levels, And Diabetic Retinal And Renal Complications                               | Marre M et al.      | 8314010             | No data for AGT |
| 11 | 1 | Hereditary factors in the development of diabetic renal disease                                                                                                    | Marre M et al.      | 10922971            | No data for AGT |
| 12 | 1 | A rare haplotype of the vitamin D receptor gene is protective against diabetic nephropathy                                                                         | Martin RJL et al.   | 19783860            | No data for AGT |
| 13 | 1 | Mutational Analysis of Agxt in Tunisian Population with Primary Hyperoxaluria Type 1.                                                                              | M'dimegh S et al.   | 27935012            | No data for AGT |
| 14 | 1 | Kinin-dependent hypersensitivity reactions in hemodialysis: metabolic and genetic factors.                                                                         | Molinaro G et al.   | 17003818            | No data for AGT |

|   |                                                                                                                                                                                                                             |                   |                     |                 |
|---|-----------------------------------------------------------------------------------------------------------------------------------------------------------------------------------------------------------------------------|-------------------|---------------------|-----------------|
| 1 | A polymorphism in the angiotensin II type 1 receptor gene has different effects on the risk of diabetic nephropathy in men and women                                                                                        | Mollsten A et al. | 21316998            | No data for AGT |
| 1 | Relationship of angiotensin-converting enzyme gene polymorphism with nephropathy associated with Type 2 diabetes mellitus in Asian Indians                                                                                  | Movva S et al.    | 17616353            | No data for AGT |
| 1 | Relationship of Serum Klotho Level With ACE Gene Polymorphism in Stable Kidney Allograft Recipients                                                                                                                         | Nahandi MZ et al. | 28270648            | No data for AGT |
| 1 | The effect of angiotensin receptor blockade (ARB) on the regression of left ventricular hypertrophy in hemodialysis patients: comparison between patients with D allele and non-D allele (ACE gene polymorphism)            | Nakayama M et al. | 16312263            | No data for AGT |
| 1 | Different Mechanisms for the Progression of CKD with ACE Gene Polymorphisms                                                                                                                                                 | Nakayama Y et al. | 19293592            | No data for AGT |
| 1 | A disease haplotype for advanced nephropathy in type 2 diabetes at the ACE locus                                                                                                                                            | Ng DPK et al.     | 16936219            | No data for AGT |
| 1 | Relationships between angiotensin I converting enzyme gene polymorphism and renal complications in Korean IDDM patients.                                                                                                    | Oh TG et al.      | 8854649             | No data for AGT |
| 1 | alpha(1)-antitrypsin gene polymorphisms are not associated with renal arterial fibromuscular dysplasia                                                                                                                      | Perdu J et al.    | 16531799            | No data for AGT |
| 1 | The frequency of factor V Leiden mutation, ACE gene polymorphism, serum ACE activity and response to ACE inhibitor and angiotensin II receptor antagonist drugs in Iranians type II diabetic patients with microalbuminuria | Rahimi Z et al.   | 20853144            | No data for AGT |
| 1 | AGTR1 rs5186 variants in patients with type 2 diabetes mellitus and nephropathy                                                                                                                                             | Razi F et al.     | WOS:000419720600009 | No data for AGT |
| 1 | Angiotensin-converting enzyme polymorphism in patients with terminal renal failure                                                                                                                                          | Schmidt A et al.  | 8785402             | No data for AGT |

|    |                                                                                                              |                                                                                                                                                                                     |                    |                     |                 |
|----|--------------------------------------------------------------------------------------------------------------|-------------------------------------------------------------------------------------------------------------------------------------------------------------------------------------|--------------------|---------------------|-----------------|
| 1  | No association of converting enzyme insertion/deletion polymorphism with immunoglobulin A glomerulonephritis | Schmidt S et al.                                                                                                                                                                    | 7485124            | No data for AGT     |                 |
| 2  |                                                                                                              |                                                                                                                                                                                     |                    |                     |                 |
| 3  |                                                                                                              |                                                                                                                                                                                     |                    |                     |                 |
| 4  |                                                                                                              |                                                                                                                                                                                     |                    |                     |                 |
| 5  |                                                                                                              |                                                                                                                                                                                     |                    |                     |                 |
| 6  | 1                                                                                                            | Angiotensin I converting enzyme gene polymorphism and diabetic nephropathy in type II diabetes                                                                                      | Schmidt S et al.   | 9269698             | No data for AGT |
| 7  |                                                                                                              |                                                                                                                                                                                     |                    |                     |                 |
| 8  |                                                                                                              |                                                                                                                                                                                     |                    |                     |                 |
| 9  | 1                                                                                                            | ACAC <sup>1</sup> gene (rs2268388) and AGTR1 gene (rs5186) polymorphism and the risk of nephropathy in Asian Indian patients with type 2 diabetes.                                  | Shah VN et al.     | 23081748            | No data for AGT |
| 10 |                                                                                                              |                                                                                                                                                                                     |                    |                     |                 |
| 11 |                                                                                                              |                                                                                                                                                                                     |                    |                     |                 |
| 12 | 1                                                                                                            | Relations between eNOS Glu298Asp polymorphism and progression of diabetic nephropathy                                                                                               | Shin Shin Y et al. | 15331206            | No data for AGT |
| 13 |                                                                                                              |                                                                                                                                                                                     |                    |                     |                 |
| 14 | 1                                                                                                            | Angiotensin I-converting enzyme genotype significantly affects progression of IgA glomerulonephritis in an Italian population                                                       | Stratta P et al.   | 10352195            | No data for AGT |
| 15 |                                                                                                              |                                                                                                                                                                                     |                    |                     |                 |
| 16 | 1                                                                                                            | The association of LOX-1 rs1050283 polymorphism with renal hypertension susceptibility in a Chinese population                                                                      | Sun YC et al.      | WOS:000395739000087 | No data for AGT |
| 17 |                                                                                                              |                                                                                                                                                                                     |                    |                     |                 |
| 18 | 1                                                                                                            | Lack Of Relationship Between An Insertion Deletion Polymorphism In The Angiotensin I-Converting Enzyme Gene And Diabetic Nephropathy And Proliferative Retinopathy In Iddm Patients | Tarnow L et al.    | 7729604             | No data for AGT |
| 19 |                                                                                                              |                                                                                                                                                                                     |                    |                     |                 |
| 20 | 1                                                                                                            | Angiotensin-II type 1 receptor gene polymorphism and diabetic microangiopathy.                                                                                                      | Tarnow L et al.    | 8671962             | No data for AGT |
| 21 |                                                                                                              |                                                                                                                                                                                     |                    |                     |                 |
| 22 | 1                                                                                                            | High prevalence of ACE DD genotype among north Indian end stage renal disease patients.                                                                                             | Tripathi G et al.  | 17042963            | No data for AGT |
| 23 |                                                                                                              |                                                                                                                                                                                     |                    |                     |                 |
| 24 | 1                                                                                                            | Angiotensin-converting enzyme gene polymorphism and vascular manifestations in Korean patients with SLE                                                                             | Uhm WS et al.      | 12043886            | No data for AGT |
| 25 |                                                                                                              |                                                                                                                                                                                     |                    |                     |                 |
| 26 | 1                                                                                                            | Increased expression of monocytic angiotensin-converting enzyme in dialysis patients with cardiovascular disease                                                                    | Ulrich C et al.    | 16476718            | No data for AGT |
| 27 |                                                                                                              |                                                                                                                                                                                     |                    |                     |                 |
| 28 | 1                                                                                                            | Synergistic expression of angiotensin-converting enzyme (ACE) and ACE2 in human renal tissue and confounding effects of hypertension on the ACE to ACE2 ratio                       | Wakahara S et al.  | 17303661            | No data for AGT |
| 29 |                                                                                                              |                                                                                                                                                                                     |                    |                     |                 |
| 30 | 1                                                                                                            | Angiotensin-converting enzyme inhibitor versus angiotensin 2 receptor antagonist therapy and the influence of angiotensin-converting enzyme gene polymorphism in IgA nephritis.     | Woo KT et al.      | 18536822            | No data for AGT |
| 31 |                                                                                                              |                                                                                                                                                                                     |                    |                     |                 |
| 32 |                                                                                                              |                                                                                                                                                                                     |                    |                     |                 |
| 33 |                                                                                                              |                                                                                                                                                                                     |                    |                     |                 |
| 34 |                                                                                                              |                                                                                                                                                                                     |                    |                     |                 |
| 35 |                                                                                                              |                                                                                                                                                                                     |                    |                     |                 |
| 36 |                                                                                                              |                                                                                                                                                                                     |                    |                     |                 |
| 37 |                                                                                                              |                                                                                                                                                                                     |                    |                     |                 |
| 38 |                                                                                                              |                                                                                                                                                                                     |                    |                     |                 |
| 39 |                                                                                                              |                                                                                                                                                                                     |                    |                     |                 |
| 40 |                                                                                                              |                                                                                                                                                                                     |                    |                     |                 |
| 41 |                                                                                                              |                                                                                                                                                                                     |                    |                     |                 |
| 42 |                                                                                                              |                                                                                                                                                                                     |                    |                     |                 |
| 43 |                                                                                                              |                                                                                                                                                                                     |                    |                     |                 |
| 44 |                                                                                                              |                                                                                                                                                                                     |                    |                     |                 |
| 45 |                                                                                                              |                                                                                                                                                                                     |                    |                     |                 |
| 46 |                                                                                                              |                                                                                                                                                                                     |                    |                     |                 |

|    |                                                                                                                      |                                                                                                                                                                                                             |                   |                 |                 |
|----|----------------------------------------------------------------------------------------------------------------------|-------------------------------------------------------------------------------------------------------------------------------------------------------------------------------------------------------------|-------------------|-----------------|-----------------|
| 1  | Involvement of platelet-derived growth factor and histocompatibility of DRB 1 in chronic renal allograft nephropathy | Yamada K et al.                                                                                                                                                                                             | 11349729          | No data for AGT |                 |
| 2  |                                                                                                                      |                                                                                                                                                                                                             |                   |                 |                 |
| 3  |                                                                                                                      |                                                                                                                                                                                                             |                   |                 |                 |
| 4  |                                                                                                                      |                                                                                                                                                                                                             |                   |                 |                 |
| 5  |                                                                                                                      |                                                                                                                                                                                                             |                   |                 |                 |
| 6  |                                                                                                                      |                                                                                                                                                                                                             |                   |                 |                 |
| 7  | 1                                                                                                                    | Angiotensin converting enzyme gene polymorphism and development of post-transplant erythrocytosis.                                                                                                          | Yildiz A et al.   | 12832741        | No data for AGT |
| 8  |                                                                                                                      |                                                                                                                                                                                                             |                   |                 |                 |
| 9  | 1                                                                                                                    | Angiotensin II type 2 receptor gene is not responsible for familial vesicoureteral reflux                                                                                                                   | Yoneda A et al.   | 12187255        | No data for AGT |
| 10 |                                                                                                                      |                                                                                                                                                                                                             |                   |                 |                 |
| 11 | 1                                                                                                                    | Polymorphism Of The Angiotensin-Converting Enzyme Gene And Clinical Aspects Of Iga Nephropathy                                                                                                              | Yorioka T et al.  | 8529313         | No data for AGT |
| 12 |                                                                                                                      |                                                                                                                                                                                                             |                   |                 |                 |
| 13 | 1                                                                                                                    | Interleukin-4 (IL4)-590C/T (rs2243250) gene polymorphism is not associated with diabetic nephropathy (DN) in Caucasians with type 2 diabetes mellitus (T2DM)                                                | Zavrsnik M et al. | 29514038        | No data for AGT |
| 14 |                                                                                                                      |                                                                                                                                                                                                             |                   |                 |                 |
| 15 | 1                                                                                                                    | Hemodynamic Parameters During Normal And Hypertensive Pregnancy In Rats: Evaluation Of Renal Salt And Water Transporters                                                                                    | Abreu N et al.    | 18293204        | Non-human study |
| 16 |                                                                                                                      |                                                                                                                                                                                                             |                   |                 |                 |
| 17 | 1                                                                                                                    | DPP-4 Inhibition on Top of Angiotensin Receptor Blockade Offers a New Therapeutic Approach for Diabetic Nephropathy                                                                                         | Alter ML et al.   | 23171828        | Non-human study |
| 18 |                                                                                                                      |                                                                                                                                                                                                             |                   |                 |                 |
| 19 | 1                                                                                                                    | Long-Term Angiotensin II Receptor Blockade Limits Hypertension, Aortic Dysfunction, and Structural Remodeling in a Rat Model of Chronic Kidney Disease                                                      | Ameer OZ et al.   | 27880955        | Non-human study |
| 20 |                                                                                                                      |                                                                                                                                                                                                             |                   |                 |                 |
| 21 | 1                                                                                                                    | Effects of Diets with Different Proportions of Protein/Carbohydrate on Retinal Manifestations in db Mice                                                                                                    | Arimura E et al.  | 29475908        | Non-human study |
| 22 |                                                                                                                      |                                                                                                                                                                                                             |                   |                 |                 |
| 23 | 1                                                                                                                    | Identification of Cathepsin L as a Potential Sex-Specific Biomarker for Renal Damage                                                                                                                        | Bauer Y et al.    | 21357272        | Non-human study |
| 24 |                                                                                                                      |                                                                                                                                                                                                             |                   |                 |                 |
| 25 | 1                                                                                                                    | Blood pressure (BP) and renal vasoconstrictor responses to acute blockade of nitric oxide: persistence of renal vasoconstriction despite normalization of BP with either verapamil or sodium nitroprusside. | Baylis C et al.   | 7562480         | Non-human study |
| 26 |                                                                                                                      |                                                                                                                                                                                                             |                   |                 |                 |
| 27 | 1                                                                                                                    | Specific pregnancy-induced angiotensin II type-1 receptor expression in ovine uterine artery does not involve formation of alternate splice variants or alternate promoter usage                            | Bird IM et al.    | 9687288         | Non-human study |
| 28 |                                                                                                                      |                                                                                                                                                                                                             |                   |                 |                 |
| 29 |                                                                                                                      |                                                                                                                                                                                                             |                   |                 |                 |
| 30 |                                                                                                                      |                                                                                                                                                                                                             |                   |                 |                 |
| 31 |                                                                                                                      |                                                                                                                                                                                                             |                   |                 |                 |
| 32 |                                                                                                                      |                                                                                                                                                                                                             |                   |                 |                 |
| 33 |                                                                                                                      |                                                                                                                                                                                                             |                   |                 |                 |
| 34 |                                                                                                                      |                                                                                                                                                                                                             |                   |                 |                 |
| 35 |                                                                                                                      |                                                                                                                                                                                                             |                   |                 |                 |
| 36 |                                                                                                                      |                                                                                                                                                                                                             |                   |                 |                 |
| 37 |                                                                                                                      |                                                                                                                                                                                                             |                   |                 |                 |
| 38 |                                                                                                                      |                                                                                                                                                                                                             |                   |                 |                 |
| 39 |                                                                                                                      |                                                                                                                                                                                                             |                   |                 |                 |
| 40 |                                                                                                                      |                                                                                                                                                                                                             |                   |                 |                 |
| 41 |                                                                                                                      |                                                                                                                                                                                                             |                   |                 |                 |
| 42 |                                                                                                                      |                                                                                                                                                                                                             |                   |                 |                 |
| 43 |                                                                                                                      |                                                                                                                                                                                                             |                   |                 |                 |
| 44 |                                                                                                                      |                                                                                                                                                                                                             |                   |                 |                 |
| 45 |                                                                                                                      |                                                                                                                                                                                                             |                   |                 |                 |
| 46 |                                                                                                                      |                                                                                                                                                                                                             |                   |                 |                 |

|    |                                                                                                                 |                                                                                                                                      |                     |                 |                 |
|----|-----------------------------------------------------------------------------------------------------------------|--------------------------------------------------------------------------------------------------------------------------------------|---------------------|-----------------|-----------------|
| 1  | N-terminal residues control proteasomal degradation of RGS2, RGS4, and RGS5 in human embryonic kidney 293 cells | Bodenstein J et al.                                                                                                                  | 17220356            | Non-human study |                 |
| 2  |                                                                                                                 |                                                                                                                                      |                     |                 |                 |
| 3  |                                                                                                                 |                                                                                                                                      |                     |                 |                 |
| 4  |                                                                                                                 |                                                                                                                                      |                     |                 |                 |
| 5  |                                                                                                                 |                                                                                                                                      |                     |                 |                 |
| 6  | 1                                                                                                               | Angiotensinogen concentrations and renin clearance : implications for blood pressure regulation.                                     | Bohlender J et al.  | 10720595        | Non-human study |
| 7  |                                                                                                                 |                                                                                                                                      |                     |                 |                 |
| 8  |                                                                                                                 |                                                                                                                                      |                     |                 |                 |
| 9  | 1                                                                                                               | Blood pressure and renin-angiotensin system resetting in transgenic rats with elevated plasma Val(5)-angiotensinogen                 | Bohlender J et al.  | 22728903        | Non-human study |
| 10 |                                                                                                                 |                                                                                                                                      |                     |                 |                 |
| 11 | 1                                                                                                               | CCN1 expression in interleukin-6 deficient mouse kidney in experimental model of heart failure                                       | Bonda TA et al.     | 23690222        | Non-human study |
| 12 |                                                                                                                 |                                                                                                                                      |                     |                 |                 |
| 13 | 1                                                                                                               | Advanced Glycated End-Products Affect HIF-Transcriptional Activity in Renal Cells                                                    | Bondeva T et al.    | 24030251        | Non-human study |
| 14 |                                                                                                                 |                                                                                                                                      |                     |                 |                 |
| 15 | 1                                                                                                               | Lack of in vivo function of osteopontin in experimental anti-GBM nephritis                                                           | Bonvini JM et al.   | 10966489        | Non-human study |
| 16 |                                                                                                                 |                                                                                                                                      |                     |                 |                 |
| 17 | 1                                                                                                               | Hypoxia/Reoxygenation of Rat Renal Arteries Impairs Vasorelaxation via Modulation of Endothelium-Independent sGC/cGMP/PKG Signaling  | Braun D et al.      | 29773995        | Non-human study |
| 18 |                                                                                                                 |                                                                                                                                      |                     |                 |                 |
| 19 | 1                                                                                                               | Angiotensin II mesenteric and renal vasoregulation: Dissimilar modulatory effects with nitroprusside                                 | Broome M et al.     | 11065204        | Non-human study |
| 20 |                                                                                                                 |                                                                                                                                      |                     |                 |                 |
| 21 | 1                                                                                                               | N-domain angiotensin I-converting enzyme expression in renal artery of Wistar, Wistar Kyoto, and spontaneously hypertensive rats     | Bueno V et al.      | 15194348        | Non-human study |
| 22 |                                                                                                                 |                                                                                                                                      |                     |                 |                 |
| 23 | 1                                                                                                               | Organizational diversity among distinct glycoprotein endoplasmic reticulum-associated degradation programs                           | Cabral CM et al.    | 12181335        | Non-human study |
| 24 |                                                                                                                 |                                                                                                                                      |                     |                 |                 |
| 25 | 1                                                                                                               | Role of NOX2 in the regulation of afferent arteriole responsiveness                                                                  | Carlstrom M et al.  | 18987286        | Non-human study |
| 26 |                                                                                                                 |                                                                                                                                      |                     |                 |                 |
| 27 | 1                                                                                                               | Adrenomedullin gene expression differences in mice do not affect blood pressure but modulate hypertension-induced pathology in males | Caron K et al.      | 17360661        | Non-human study |
| 28 |                                                                                                                 |                                                                                                                                      |                     |                 |                 |
| 29 | 1                                                                                                               | Appropriate regulation of renin and blood pressure in 45-kb human renin/human angiotensinogen transgenic mice.                       | Catanzaro DF et al. | 9931123         | Non-human study |
| 30 |                                                                                                                 |                                                                                                                                      |                     |                 |                 |
| 31 | 1                                                                                                               | Mice lacking endothelial ACE - Normal blood pressure with elevated angiotensin                                                       | Cole JM et al.      | 12574101        | Non-human study |
| 32 |                                                                                                                 |                                                                                                                                      |                     |                 |                 |
| 33 |                                                                                                                 |                                                                                                                                      |                     |                 |                 |
| 34 |                                                                                                                 |                                                                                                                                      |                     |                 |                 |
| 35 |                                                                                                                 |                                                                                                                                      |                     |                 |                 |
| 36 |                                                                                                                 |                                                                                                                                      |                     |                 |                 |
| 37 |                                                                                                                 |                                                                                                                                      |                     |                 |                 |
| 38 |                                                                                                                 |                                                                                                                                      |                     |                 |                 |
| 39 |                                                                                                                 |                                                                                                                                      |                     |                 |                 |
| 40 |                                                                                                                 |                                                                                                                                      |                     |                 |                 |
| 41 |                                                                                                                 |                                                                                                                                      |                     |                 |                 |
| 42 |                                                                                                                 |                                                                                                                                      |                     |                 |                 |
| 43 |                                                                                                                 |                                                                                                                                      |                     |                 |                 |
| 44 |                                                                                                                 |                                                                                                                                      |                     |                 |                 |
| 45 |                                                                                                                 |                                                                                                                                      |                     |                 |                 |
| 46 |                                                                                                                 |                                                                                                                                      |                     |                 |                 |

|    |   |                                                                                                                                                                  |                      |          |                 |
|----|---|------------------------------------------------------------------------------------------------------------------------------------------------------------------|----------------------|----------|-----------------|
| 1  | 1 | Natriuretic peptides buffer renin-dependent hypertension                                                                                                         | Demerath T et al.    | 24717731 | Non-human study |
| 2  |   |                                                                                                                                                                  |                      |          |                 |
| 3  |   |                                                                                                                                                                  |                      |          |                 |
| 4  |   |                                                                                                                                                                  |                      |          |                 |
| 5  | 1 | Renin-angiotensin system transgenic mouse model recapitulates pathophysiology similar to human preeclampsia with renal injury that may be mediated through VEGF. | Denney JM et al.     | 27927648 | Non-human study |
| 6  |   |                                                                                                                                                                  |                      |          |                 |
| 7  |   |                                                                                                                                                                  |                      |          |                 |
| 8  | 1 | Mycophenolate mofetil prevents cerebrovascular injury in stroke-prone spontaneously hypertensive rats                                                            | Dhande IS et al.     | 28011882 | Non-human study |
| 9  |   |                                                                                                                                                                  |                      |          |                 |
| 10 |   |                                                                                                                                                                  |                      |          |                 |
| 11 | 1 | Inhibition of proximal tubular fluid absorption by nitric oxide and atrial natriuretic peptide in rat kidney                                                     | Eitle E et al.       | 9575805  | Non-human study |
| 12 |   |                                                                                                                                                                  |                      |          |                 |
| 13 |   |                                                                                                                                                                  |                      |          |                 |
| 14 | 1 | Complex interactions of NO/cGMP/PKG systems on Ca <sup>2+</sup> signaling in afferent arteriolar vascular smooth muscle                                          | Fellner SK et al.    | 19880669 | Non-human study |
| 15 |   |                                                                                                                                                                  |                      |          |                 |
| 16 |   |                                                                                                                                                                  |                      |          |                 |
| 17 | 1 | Cardiac angiotensin-(1-12) expression and systemic hypertension in rats expressing the human angiotensinogen gene.                                               | Ferrario CM et al.   | 26873967 | Non-human study |
| 18 |   |                                                                                                                                                                  |                      |          |                 |
| 19 |   |                                                                                                                                                                  |                      |          |                 |
| 20 | 1 | Attenuation of accelerated renal cystogenesis in Pkd1 mice by renin-angiotensin system blockade                                                                  | Fitzgibbon WR et al. | 29021226 | Non-human study |
| 21 |   |                                                                                                                                                                  |                      |          |                 |
| 22 | 1 | Renal cyst growth is the main determinant for hypertension and concentrating deficit in Pkd1-deficient mice                                                      | Fonseca JM et al.    | 24429399 | Non-human study |
| 23 |   |                                                                                                                                                                  |                      |          |                 |
| 24 |   |                                                                                                                                                                  |                      |          |                 |
| 25 | 1 | Acute elevations in salt intake and reduced renal mass hypertension compromise arteriolar dilation in rat cremaster muscle                                       | Frisbee JC et al.    | 10329253 | Non-human study |
| 26 |   |                                                                                                                                                                  |                      |          |                 |
| 27 |   |                                                                                                                                                                  |                      |          |                 |
| 28 | 1 | Contribution of cytochrome P-450 omega-hydroxylase to altered arteriolar reactivity with high-salt diet and hypertension                                         | Frisbee JC et al.    | 10775129 | Non-human study |
| 29 |   |                                                                                                                                                                  |                      |          |                 |
| 30 | 1 | Adenosine A(1) receptor-dependent and independent pathways in modulating renal vascular responses to angiotensin II                                              | Gao X et al.         | 25251152 | Non-human study |
| 31 |   |                                                                                                                                                                  |                      |          |                 |
| 32 |   |                                                                                                                                                                  |                      |          |                 |
| 33 | 1 | Connexin 43 is not essential for the control of renin synthesis and secretion                                                                                    | Gerl M et al.        | 24062052 | Non-human study |
| 34 |   |                                                                                                                                                                  |                      |          |                 |
| 35 |   |                                                                                                                                                                  |                      |          |                 |
| 36 | 1 | Metformin prevents the impairment of endothelium-dependent vascular relaxation induced by high glucose challenge in rabbit isolated perfused kidneys             | Gomes MB et al.      | 16133490 | Non-human study |
| 37 |   |                                                                                                                                                                  |                      |          |                 |
| 38 |   |                                                                                                                                                                  |                      |          |                 |
| 39 | 1 | Effect of the angiotensinogen genotype on experimental hypertension in mice                                                                                      | Handtrack C et al.   | 17333097 | Non-human study |
| 40 |   |                                                                                                                                                                  |                      |          |                 |
| 41 |   |                                                                                                                                                                  |                      |          |                 |
| 42 |   |                                                                                                                                                                  |                      |          |                 |
| 43 |   |                                                                                                                                                                  |                      |          |                 |
| 44 |   |                                                                                                                                                                  |                      |          |                 |
| 45 |   |                                                                                                                                                                  |                      |          |                 |
| 46 |   |                                                                                                                                                                  |                      |          |                 |

|    |                                                                          |                                                                                                                                                                                     |                           |                 |                 |
|----|--------------------------------------------------------------------------|-------------------------------------------------------------------------------------------------------------------------------------------------------------------------------------|---------------------------|-----------------|-----------------|
| 1  | Cytoprotective effects of nitrates in a cellular model of hydronephrosis | Hegarty NJ et al.                                                                                                                                                                   | 12081565                  | Non-human study |                 |
| 2  |                                                                          |                                                                                                                                                                                     |                           |                 |                 |
| 3  |                                                                          |                                                                                                                                                                                     |                           |                 |                 |
| 4  | 1                                                                        | The genetic deletion of Mas abolishes salt induced hypertension in mice                                                                                                             | Heringer-Walther S et al. | 22652430        | Non-human study |
| 5  |                                                                          |                                                                                                                                                                                     |                           |                 |                 |
| 6  | 1                                                                        | Pressor and sympathoexcitatory effects of nitric oxide in the rostral ventrolateral medulla                                                                                         | Hirooka Y et al.          | 8934360         | Non-human study |
| 7  |                                                                          |                                                                                                                                                                                     |                           |                 |                 |
| 8  | 1                                                                        | An essential role of angiotensin II receptor type 1a in recipient kidney, not in transplanted peripheral blood leukocytes, in progressive immune-mediated renal injury              | Hisada Y et al.           | 11555672        | Non-human study |
| 9  |                                                                          |                                                                                                                                                                                     |                           |                 |                 |
| 10 | 1                                                                        | The angiotensin type II receptor tonically inhibits angiotensin-converting enzyme in AT2 null mutant mice                                                                           | Hunley TE et al.          | 10652034        | Non-human study |
| 11 |                                                                          |                                                                                                                                                                                     |                           |                 |                 |
| 12 | 1                                                                        | NOS1-dependent negative feedback regulation of the epithelial sodium channel in the collecting duct                                                                                 | Hyndman KA et al.         | 25391901        | Non-human study |
| 13 |                                                                          |                                                                                                                                                                                     |                           |                 |                 |
| 14 | 1                                                                        | Collecting Duct Nitric Oxide Synthase 1 beta Activation Maintains Sodium Homeostasis During High Sodium Intake Through Suppression of Aldosterone and Renal Angiotensin II Pathways | Hyndman KA et al.         | 29066445        | Non-human study |
| 15 |                                                                          |                                                                                                                                                                                     |                           |                 |                 |
| 16 | 1                                                                        | Pathophysiological roles of adrenomedullin-RAMP2 system in acute and chronic cerebral ischemia                                                                                      | Igarashi K et al.         | 25252154        | Non-human study |
| 17 |                                                                          |                                                                                                                                                                                     |                           |                 |                 |
| 18 | 1                                                                        | Role of A(1) receptors in renal sympathetic neurotransmission in the mouse kidney                                                                                                   | Jackson EK et al.         | 22874760        | Non-human study |
| 19 |                                                                          |                                                                                                                                                                                     |                           |                 |                 |
| 20 | 1                                                                        | mPGES-1 deletion potentiates urine concentrating capability after water deprivation                                                                                                 | Jia ZJ et al.             | 22237797        | Non-human study |
| 21 |                                                                          |                                                                                                                                                                                     |                           |                 |                 |
| 22 | 1                                                                        | Transfer of a salt-resistant renin allele raises blood pressure in Dahl salt-sensitive rats                                                                                         | Jiang J et al.            | 9040448         | Non-human study |
| 23 |                                                                          |                                                                                                                                                                                     |                           |                 |                 |
| 24 | 1                                                                        | Angiotensin-converting enzyme inhibition attenuates the progression of rat hepatic fibrosis                                                                                         | Jonsson JR et al.         | 11438504        | Non-human study |
| 25 |                                                                          |                                                                                                                                                                                     |                           |                 |                 |
| 26 | 1                                                                        | Rat Ace allele variation determines susceptibility to AngII-induced renal damage                                                                                                    | Kamilic J et al.          | 21788250        | Non-human study |
| 27 |                                                                          |                                                                                                                                                                                     |                           |                 |                 |
| 28 | 1                                                                        | Genetic-Control Of Blood-Pressure And The Angiotensinogen Locus                                                                                                                     | Kim HS et al.             | 7708716         | Non-human study |
| 29 |                                                                          |                                                                                                                                                                                     |                           |                 |                 |
| 30 |                                                                          |                                                                                                                                                                                     |                           |                 |                 |
| 31 |                                                                          |                                                                                                                                                                                     |                           |                 |                 |
| 32 |                                                                          |                                                                                                                                                                                     |                           |                 |                 |
| 33 |                                                                          |                                                                                                                                                                                     |                           |                 |                 |
| 34 |                                                                          |                                                                                                                                                                                     |                           |                 |                 |
| 35 |                                                                          |                                                                                                                                                                                     |                           |                 |                 |
| 36 |                                                                          |                                                                                                                                                                                     |                           |                 |                 |
| 37 |                                                                          |                                                                                                                                                                                     |                           |                 |                 |
| 38 |                                                                          |                                                                                                                                                                                     |                           |                 |                 |
| 39 |                                                                          |                                                                                                                                                                                     |                           |                 |                 |
| 40 |                                                                          |                                                                                                                                                                                     |                           |                 |                 |
| 41 |                                                                          |                                                                                                                                                                                     |                           |                 |                 |
| 42 |                                                                          |                                                                                                                                                                                     |                           |                 |                 |
| 43 |                                                                          |                                                                                                                                                                                     |                           |                 |                 |
| 44 |                                                                          |                                                                                                                                                                                     |                           |                 |                 |
| 45 |                                                                          |                                                                                                                                                                                     |                           |                 |                 |
| 46 |                                                                          |                                                                                                                                                                                     |                           |                 |                 |

|    |   |                                                                                                                                                |                        |          |                 |
|----|---|------------------------------------------------------------------------------------------------------------------------------------------------|------------------------|----------|-----------------|
| 1  | 1 | Regulation of renin secretion and expression in mice deficient in ss 1-and ss 2-adrenergic receptors                                           | Kim SM et al.          | 17515456 | Non-human study |
| 2  | 1 | Low Blood Pressure in Endothelial Cell-Specific Endothelin 1 Knockout Mice                                                                     | Kisanuki YY et al.     | 20516397 | Non-human study |
| 3  | 1 | Lack of an effect of collecting duct-specific deletion of adenylyl cyclase 3 on renal Na <sup>+</sup> and water excretion or arterial pressure | Kittikulstuth W et al. | 24431204 | Non-human study |
| 4  | 1 | Effect of the plasminogen-plasmin system on hypertensive renal and cardiac damage                                                              | Knier B et al.         | 21610512 | Non-human study |
| 5  | 1 | Axl mediates vascular remodeling induced by deoxycorticosterone acetate-salt hypertension                                                      | Korshunov VA et al.    | 17923589 | Non-human study |
| 6  | 1 | Reciprocal expression of connexin 40 and 45 during phenotypical changes in renin-secreting cells                                               | Kurt B et al.          | 21209011 | Non-human study |
| 7  | 1 | Stimulation of renin secretion by NO donors is related to the cAMP pathway                                                                     | Kurtz A et al.         | 9575895  | Non-human study |
| 8  | 1 | The angiotensin II receptor blocker candesartan improves survival and mesenteric perfusion in an acute porcine endotoxin model                 | Laesser M et al.       | 14995942 | Non-human study |
| 9  | 1 | Physiological impact of increased expression of the AT(1) angiotensin receptor                                                                 | Le TH et al.           | 12963678 | Non-human study |
| 10 | 1 | Nitric oxide reduces the molecular activity of Na <sup>+</sup> ,K <sup>+</sup> -ATPase in opossum kidney cells                                 | Liang MY et al.        | 10432402 | Non-human study |
| 11 | 1 | Regulation of sympathetic nerve activity in heart failure - A role for nitric oxide and angiotensin II                                         | Liu JL et al.          | 10066676 | Non-human study |
| 12 | 1 | Overexpression of cytochrome P450 4F2 in mice increases 20-hydroxyeicosatetraenoic acid production and arterial blood pressure                 | Liu XL et al.          | 19279555 | Non-human study |
| 13 | 1 | Sodium-Nitroprusside Increases Glomerular Capillary Hydraulic Conductivity In Isolated Rat Glomeruli                                           | Lovell HB et al.       | 7706899  | Non-human study |
| 14 | 1 | Macula Densa Nitric Oxide Synthase 1 beta Protects against Salt-Sensitive Hypertension                                                         | Lu Y et al.            | 26647426 | Non-human study |
| 15 | 1 | Correction of an enzyme trafficking defect in hereditary kidney stone disease in vitro                                                         | Lumb MJ et al.         | 12737622 | Non-human study |



|    |                                                                                                                                     |                                                                                                                                          |                         |                     |                 |
|----|-------------------------------------------------------------------------------------------------------------------------------------|------------------------------------------------------------------------------------------------------------------------------------------|-------------------------|---------------------|-----------------|
| 1  | Development and Analysis of Alpha 1-Antitrypsin Neoglycoproteins: The Impact of Additional N-Glycosylation Sites on Serum Half-Life | Lusch A et al.                                                                                                                           | 23668542                | Non-human study     |                 |
| 2  |                                                                                                                                     |                                                                                                                                          |                         |                     |                 |
| 3  |                                                                                                                                     |                                                                                                                                          |                         |                     |                 |
| 4  | 1                                                                                                                                   | Connexin 40 is dispensable for vascular renin cell recruitment but is indispensable for vascular baroreceptor control of renin secretion | Machura K et al.        | 25241776            | Non-human study |
| 5  |                                                                                                                                     |                                                                                                                                          |                         |                     |                 |
| 6  | 1                                                                                                                                   | Angiotensin receptor-binding protein ATRAP/Agtrap inhibits metabolic dysfunction with visceral obesity.                                  | Maeda A et al.          | 23902639            | Non-human study |
| 7  |                                                                                                                                     |                                                                                                                                          |                         |                     |                 |
| 8  | 1                                                                                                                                   | Effect of sodium nitroprusside on norepinephrine overflow and antidiuresis induced by stimulation of renal nerves in anesthetized dogs   | Maekawa H et al.        | 8720419             | Non-human study |
| 9  |                                                                                                                                     |                                                                                                                                          |                         |                     |                 |
| 10 | 1                                                                                                                                   | Hypertension in unilaterally nephrectomized rats induced by single-kidney transfection with angiotensinogen cDNA                         | Marley WS et al.        | 10567853            | Non-human study |
| 11 |                                                                                                                                     |                                                                                                                                          |                         |                     |                 |
| 12 | 1                                                                                                                                   | A novel rodent model of pregnancy complications associated with genetically determined angiotensin-converting enzyme (ACE) activity      | Mata-Greenwood E et al. | 29360395            | Non-human study |
| 13 |                                                                                                                                     |                                                                                                                                          |                         |                     |                 |
| 14 | 1                                                                                                                                   | Chronic regulation of arterial blood pressure by ANP: role of endogenous vasoactive endothelial factors                                  | Melo LG et al.          | 9815091             | Non-human study |
| 15 |                                                                                                                                     |                                                                                                                                          |                         |                     |                 |
| 16 | 1                                                                                                                                   | Chronic hypertension and altered baroreflex responses in transgenic mice containing the human renin and human angiotensinogen genes      | Merrill DC et al.       | 8613528             | Non-human study |
| 17 |                                                                                                                                     |                                                                                                                                          |                         |                     |                 |
| 18 | 1                                                                                                                                   | Role of endothelium-derived relaxing factors in the renal response to vasoactive agents in hypothyroid rats                              | Moreno JM et al.        | 12657567            | Non-human study |
| 19 |                                                                                                                                     |                                                                                                                                          |                         |                     |                 |
| 20 | 1                                                                                                                                   | Hypervolemia of pregnancy is not maintained in mice chronically overexpressing angiotensinogen                                           | Morgan TK et al.        | 16796982            | Non-human study |
| 21 |                                                                                                                                     |                                                                                                                                          |                         |                     |                 |
| 22 | 1                                                                                                                                   | Vascular angiotensin-converting enzyme expression regulates local angiotensin II                                                         | Muller DN et al.        | 9039087             | Non-human study |
| 23 |                                                                                                                                     |                                                                                                                                          |                         |                     |                 |
| 24 | 1                                                                                                                                   | AKAP150 is required for stuttering persistent Ca <sup>2+</sup> sparklets and angiotensin II-induced hypertension                         | Navedo MF et al.        | 18174462            | Non-human study |
| 25 |                                                                                                                                     |                                                                                                                                          |                         |                     |                 |
| 26 | 1                                                                                                                                   | Angiotensin-II Enhances Norepinephrine Spillover During Sympathetic Activation In Conscious Rabbits                                      | Noshiro T et al.        | WOS:A1994NP99600022 | Non-human study |
| 27 |                                                                                                                                     |                                                                                                                                          |                         |                     |                 |
| 28 |                                                                                                                                     |                                                                                                                                          |                         |                     |                 |
| 29 |                                                                                                                                     |                                                                                                                                          |                         |                     |                 |
| 30 |                                                                                                                                     |                                                                                                                                          |                         |                     |                 |
| 31 |                                                                                                                                     |                                                                                                                                          |                         |                     |                 |
| 32 |                                                                                                                                     |                                                                                                                                          |                         |                     |                 |
| 33 |                                                                                                                                     |                                                                                                                                          |                         |                     |                 |
| 34 |                                                                                                                                     |                                                                                                                                          |                         |                     |                 |
| 35 |                                                                                                                                     |                                                                                                                                          |                         |                     |                 |
| 36 |                                                                                                                                     |                                                                                                                                          |                         |                     |                 |
| 37 |                                                                                                                                     |                                                                                                                                          |                         |                     |                 |
| 38 |                                                                                                                                     |                                                                                                                                          |                         |                     |                 |
| 39 |                                                                                                                                     |                                                                                                                                          |                         |                     |                 |
| 40 |                                                                                                                                     |                                                                                                                                          |                         |                     |                 |
| 41 |                                                                                                                                     |                                                                                                                                          |                         |                     |                 |
| 42 |                                                                                                                                     |                                                                                                                                          |                         |                     |                 |
| 43 |                                                                                                                                     |                                                                                                                                          |                         |                     |                 |
| 44 |                                                                                                                                     |                                                                                                                                          |                         |                     |                 |
| 45 |                                                                                                                                     |                                                                                                                                          |                         |                     |                 |
| 46 |                                                                                                                                     |                                                                                                                                          |                         |                     |                 |

|   |                                                                                                                                                                           |                            |          |                 |
|---|---------------------------------------------------------------------------------------------------------------------------------------------------------------------------|----------------------------|----------|-----------------|
| 1 | Effects of potassium adaptation on blood pressure and pressor responses in normotensive and renal hypertensive Wistar rats                                                | Omogbai EL et al.          | 15834453 | Non-human study |
| 1 | Altered regulation of renal interstitial hydrostatic pressure and the renal renin-angiotensin system in the absence of atrial natriuretic peptide                         | O'Tierney PF et al.        | 18192845 | Non-human study |
| 1 | Effects of Stimulation of Soluble Guanylate Cyclase on Diabetic Nephropathy in Diabetic eNOS Knockout Mice on Top of Angiotensin II Receptor Blockade                     | Ott IM et al.              | 22900035 | Non-human study |
| 1 | Nitric oxide modulates angiotensin II- and norepinephrine-dependent vasoconstriction in rat kidney                                                                        | Parekh N et al.            | 8780230  | Non-human study |
| 1 | Gene Trapping Uncovers Sex-Specific Mechanisms for Upstream Stimulatory Factors 1 and 2 in Angiotensinogen Expression                                                     | Park S et al.              | 22547438 | Non-human study |
| 1 | Hyperplastic Growth Of Aortic Smooth-Muscle Cells In Renovascular Hypertensive Rabbits Is Characterized By The Expansion Of An Immature Cell Phenotype                    | Pauletto P et al.          | 8156626  | Non-human study |
| 1 | Mechanical Basis of Osmosensory Transduction in Magnocellular Neurosecretory Neurones of the Rat Supraoptic Nucleus                                                       | Prager-Khoutorsky M et al. | 25712904 | Non-human study |
| 1 | Calcium/Calmodulin-Dependent Kinase II Inhibition in Smooth Muscle Reduces Angiotensin II-Induced Hypertension by Controlling Aortic Remodeling and Baroreceptor Function | Prasad AM et al.           | 26077587 | Non-human study |
| 1 | Endothelium-Dependent Control Of Vascular Tone In The Rabbit Kidney After Ischemia And Reperfusion                                                                        | Pruneau D et al.           | 8453977  | Non-human study |
| 1 | Angiotensin II stimulates the synthesis and secretion of vascular permeability factor vascular endothelial growth factor in human mesangial cells                         | Pupilli C et al.           | 10215323 | Non-human study |
| 1 | Loss of Notch3 Signaling in Vascular Smooth Muscle Cells Promotes Severe Heart Failure Upon Hypertension                                                                  | Ragot H et al.             | 27296994 | Non-human study |
| 1 | Knockdown of parathyroid hormone related protein in smooth muscle cells alters renal hemodynamics but not blood pressure                                                  | Raison D et al.            | 23720345 | Non-human study |

|    |                                                                                        |                                                                                                                                                                                                                                                    |                          |                     |                 |
|----|----------------------------------------------------------------------------------------|----------------------------------------------------------------------------------------------------------------------------------------------------------------------------------------------------------------------------------------------------|--------------------------|---------------------|-----------------|
| 1  | Nephron-specific deletion of the prorenin receptor causes a urine concentration defect | Ramkumar N et al.                                                                                                                                                                                                                                  | 25995108                 | Non-human study     |                 |
| 2  |                                                                                        |                                                                                                                                                                                                                                                    |                          |                     |                 |
| 3  |                                                                                        |                                                                                                                                                                                                                                                    |                          |                     |                 |
| 4  |                                                                                        |                                                                                                                                                                                                                                                    |                          |                     |                 |
| 5  |                                                                                        |                                                                                                                                                                                                                                                    |                          |                     |                 |
| 6  | 1                                                                                      | Possible role for nephron-derived angiotensinogen in angiotensin-II dependent hypertension                                                                                                                                                         | Ramkumar N et al.        | WOS:000380233800013 | Non-human study |
| 7  |                                                                                        |                                                                                                                                                                                                                                                    |                          |                     |                 |
| 8  |                                                                                        |                                                                                                                                                                                                                                                    |                          |                     |                 |
| 9  |                                                                                        |                                                                                                                                                                                                                                                    |                          |                     |                 |
| 10 |                                                                                        |                                                                                                                                                                                                                                                    |                          |                     |                 |
| 11 |                                                                                        |                                                                                                                                                                                                                                                    |                          |                     |                 |
| 12 |                                                                                        |                                                                                                                                                                                                                                                    |                          |                     |                 |
| 13 |                                                                                        |                                                                                                                                                                                                                                                    |                          |                     |                 |
| 14 | 1                                                                                      | 20-Hydroxyeicosatetraenoic Acid (HETE)-dependent Hypertension in Human Cytochrome P450 (CYP) 4A11 Transgenic Mice<br>NORMALIZATION OF BLOOD PRESSURE BY SODIUM RESTRICTION, HYDROCHLOROTHIAZIDE, OR BLOCKADE OF THE TYPE 1 ANGIOTENSIN II RECEPTOR | Savas S et al.           | WOS:000380826700046 | Non-human study |
| 15 |                                                                                        |                                                                                                                                                                                                                                                    |                          |                     |                 |
| 16 | 1                                                                                      | Angiotensin converting enzyme (ACE) gene expression in experimentally induced liver cirrhosis in rats                                                                                                                                              | Shahid SM et al.         | 24035938            | Non-human study |
| 17 |                                                                                        |                                                                                                                                                                                                                                                    |                          |                     |                 |
| 18 |                                                                                        |                                                                                                                                                                                                                                                    |                          |                     |                 |
| 19 |                                                                                        |                                                                                                                                                                                                                                                    |                          |                     |                 |
| 20 | 1                                                                                      | Strain differences in angiotensin-converting enzyme and angiotensin II type I receptor expression. Possible implications for experimental chronic renal transplant failure                                                                         | Smit-van Oosten A et al. | 11984748            | Non-human study |
| 21 |                                                                                        |                                                                                                                                                                                                                                                    |                          |                     |                 |
| 22 | 1                                                                                      | Association of a novel polymorphism in the bovine PPARGC1A gene with growth, slaughter and meat quality traits in Brangus steers                                                                                                                   | Soria LA et al.          | 19665052            | Non-human study |
| 23 |                                                                                        |                                                                                                                                                                                                                                                    |                          |                     |                 |
| 24 | 1                                                                                      | Angiotensin II Type 1A Receptors in Vascular Smooth Muscle Cells Do Not Influence Aortic Remodeling in Hypertension                                                                                                                                | Sparks MA et al.         | 21242463            | Non-human study |
| 25 |                                                                                        |                                                                                                                                                                                                                                                    |                          |                     |                 |
| 26 | 1                                                                                      | Thromboxane Receptors in Smooth Muscle Promote Hypertension, Vascular Remodeling, and Sudden Death                                                                                                                                                 | Sparks MA et al.         | 23150508            | Non-human study |
| 27 |                                                                                        |                                                                                                                                                                                                                                                    |                          |                     |                 |
| 28 |                                                                                        |                                                                                                                                                                                                                                                    |                          |                     |                 |
| 29 | 1                                                                                      | Losartan and Sodium Nitroprusside Effectively Protect against Renal Impairments after Ischemia and Reperfusion in Rats                                                                                                                             | Srisawat U et al.        | 25947921            | Non-human study |
| 30 |                                                                                        |                                                                                                                                                                                                                                                    |                          |                     |                 |
| 31 | 1                                                                                      | Natriuretic Peptide Receptor Guanylyl Cyclase-A in Podocytes is Renoprotective but Dispensable for Physiologic Renal Function                                                                                                                      | Staffel J et al.         | 27153922            | Non-human study |
| 32 |                                                                                        |                                                                                                                                                                                                                                                    |                          |                     |                 |
| 33 |                                                                                        |                                                                                                                                                                                                                                                    |                          |                     |                 |
| 34 | 1                                                                                      | Co-operation between particulate and soluble guanylyl cyclase systems in the rat renal glomeruli                                                                                                                                                   | Stepinski J et al.       | 11016869            | Non-human study |
| 35 |                                                                                        |                                                                                                                                                                                                                                                    |                          |                     |                 |
| 36 | 1                                                                                      | Renal angiotensin converting enzyme promotes renal damage during ureteral obstruction                                                                                                                                                              | Stoneking BJ et al.      | 9719278             | Non-human study |
| 37 |                                                                                        |                                                                                                                                                                                                                                                    |                          |                     |                 |
| 38 |                                                                                        |                                                                                                                                                                                                                                                    |                          |                     |                 |
| 39 | 1                                                                                      | Mediation of tubuloglomerular feedback by adenosine: Evidence from mice lacking adenosine 1 receptors                                                                                                                                              | Sun DQ et al.            | 11504952            | Non-human study |
| 40 |                                                                                        |                                                                                                                                                                                                                                                    |                          |                     |                 |
| 41 |                                                                                        |                                                                                                                                                                                                                                                    |                          |                     |                 |
| 42 |                                                                                        |                                                                                                                                                                                                                                                    |                          |                     |                 |
| 43 |                                                                                        |                                                                                                                                                                                                                                                    |                          |                     |                 |
| 44 |                                                                                        |                                                                                                                                                                                                                                                    |                          |                     |                 |
| 45 |                                                                                        |                                                                                                                                                                                                                                                    |                          |                     |                 |
| 46 |                                                                                        |                                                                                                                                                                                                                                                    |                          |                     |                 |

|    |                                                                                                                                                                                                  |                       |          |                 |
|----|--------------------------------------------------------------------------------------------------------------------------------------------------------------------------------------------------|-----------------------|----------|-----------------|
| 1  | Cross-species transcriptomic analysis elucidates constitutive aryl hydrocarbon receptor activity                                                                                                 | Sun RX et al.         | 25467400 | Non-human study |
| 2  |                                                                                                                                                                                                  |                       |          |                 |
| 3  |                                                                                                                                                                                                  |                       |          |                 |
| 4  |                                                                                                                                                                                                  |                       |          |                 |
| 5  |                                                                                                                                                                                                  |                       |          |                 |
| 6  | 1 Blood Pressure Control by a Secreted FGF1 (Fibroblast Growth Factor-Binding Protein).                                                                                                          | Tassi E et al.        | 29158353 | Non-human study |
| 7  |                                                                                                                                                                                                  |                       |          |                 |
| 8  |                                                                                                                                                                                                  |                       |          |                 |
| 9  | 1 Regulation of Na <sup>+</sup> /K <sup>+</sup> -ATPase activity by nitric oxide in the kidney and gill of the brown trout ( <i>Salmo trutta</i> )                                               | Tipsmark CK et al.    | 12654889 | Non-human study |
| 10 |                                                                                                                                                                                                  |                       |          |                 |
| 11 | 1 Mechanisms of Renal. Control of Potassium Homeostasis in Complete Aldosterone Deficiency                                                                                                       | Todkar A et al.       | 25071088 | Non-human study |
| 12 |                                                                                                                                                                                                  |                       |          |                 |
| 13 | 1 Functional genetic variation in aminopeptidase A (ENPEP): Lack of clear association with focal and segmental glomerulosclerosis (FSGS)                                                         | Tonna S et al.        | 18206321 | Non-human study |
| 14 |                                                                                                                                                                                                  |                       |          |                 |
| 15 | 1 Angiotensin II-dependent chronic hypertension and cardiac hypertrophy are unaffected by gp91phox-containing NADPH oxidase                                                                      | Touyz RM et al.       | 15753233 | Non-human study |
| 16 |                                                                                                                                                                                                  |                       |          |                 |
| 17 | 1 Increased availability of nitric oxide leads to enhanced nitric oxide dependency of tubuloglomerular feedback in the contralateral kidney of rats with 2-kidney, 1-clip Goldblatt hypertension | Turkstra E et al.     | 10523346 | Non-human study |
| 18 |                                                                                                                                                                                                  |                       |          |                 |
| 19 | 1 Cardiac phenotype and angiotensin II levels in AT(1a), AT(1b), and AT(2) receptor single, double, and triple knockouts                                                                         | van Esch JHM et al.   | 20071356 | Non-human study |
| 20 |                                                                                                                                                                                                  |                       |          |                 |
| 21 | 1 Blood pressure and renal hemodynamic responses to acute angiotensin II infusion are enhanced in a female mouse model of systemic lupus erythematosus                                           | Venegas-Pont M et al. | 21900645 | Non-human study |
| 22 |                                                                                                                                                                                                  |                       |          |                 |
| 23 | 1 Compensatory up-regulation of angiotensin II subtype 1 receptors in alpha ENaC knockout heterozygous mice                                                                                      | Wang Q et al.         | 11380824 | Non-human study |
| 24 |                                                                                                                                                                                                  |                       |          |                 |
| 25 | 1 Inhibition of Nitric Oxide Synthase 1 Induces Salt-Sensitive Hypertension in Nitric Oxide Synthase 1 alpha Knockout and Wild-Type Mice                                                         | Wang XM et al.        | 26883268 | Non-human study |
| 26 |                                                                                                                                                                                                  |                       |          |                 |
| 27 | 1 Nebivolol treatment improves resistant arterial function and reduces ventricular hypertrophy and angiotensin II in spontaneously hypertension rats                                             | Wang Y et al.         | 23263161 | Non-human study |
| 28 |                                                                                                                                                                                                  |                       |          |                 |
| 29 |                                                                                                                                                                                                  |                       |          |                 |
| 30 |                                                                                                                                                                                                  |                       |          |                 |
| 31 |                                                                                                                                                                                                  |                       |          |                 |
| 32 |                                                                                                                                                                                                  |                       |          |                 |
| 33 |                                                                                                                                                                                                  |                       |          |                 |
| 34 |                                                                                                                                                                                                  |                       |          |                 |
| 35 |                                                                                                                                                                                                  |                       |          |                 |
| 36 |                                                                                                                                                                                                  |                       |          |                 |
| 37 |                                                                                                                                                                                                  |                       |          |                 |
| 38 |                                                                                                                                                                                                  |                       |          |                 |
| 39 |                                                                                                                                                                                                  |                       |          |                 |
| 40 |                                                                                                                                                                                                  |                       |          |                 |
| 41 |                                                                                                                                                                                                  |                       |          |                 |
| 42 |                                                                                                                                                                                                  |                       |          |                 |
| 43 |                                                                                                                                                                                                  |                       |          |                 |
| 44 |                                                                                                                                                                                                  |                       |          |                 |
| 45 |                                                                                                                                                                                                  |                       |          |                 |
| 46 |                                                                                                                                                                                                  |                       |          |                 |

|    |                                                                                                                                              |                                                                                                                                                                               |                    |                     |                          |
|----|----------------------------------------------------------------------------------------------------------------------------------------------|-------------------------------------------------------------------------------------------------------------------------------------------------------------------------------|--------------------|---------------------|--------------------------|
| 1  | Human GRK4 gamma(142V) Variant Promotes Angiotensin II Type I Receptor-Mediated Hypertension via Renal Histone Deacetylase Type 1 Inhibition | Wang Z et al.                                                                                                                                                                 | 26667412           | Non-human study     |                          |
| 2  |                                                                                                                                              |                                                                                                                                                                               |                    |                     |                          |
| 3  |                                                                                                                                              |                                                                                                                                                                               |                    |                     |                          |
| 4  |                                                                                                                                              |                                                                                                                                                                               |                    |                     |                          |
| 5  |                                                                                                                                              |                                                                                                                                                                               |                    |                     |                          |
| 6  | 1                                                                                                                                            |                                                                                                                                                                               |                    |                     |                          |
| 7  | 1                                                                                                                                            | Role of neutral endopeptidase 24.11 in AV fistular rat model of heart failure                                                                                                 | Wegner M et al.    | 8759244             | Non-human study          |
| 8  |                                                                                                                                              |                                                                                                                                                                               |                    |                     |                          |
| 9  |                                                                                                                                              |                                                                                                                                                                               |                    |                     |                          |
| 10 | 1                                                                                                                                            | Lysine-Specific Demethylase 1: An Epigenetic Regulator of Salt-Sensitive Hypertension                                                                                         | Williams JS et al. | 22534796            | Non-human study          |
| 11 |                                                                                                                                              |                                                                                                                                                                               |                    |                     |                          |
| 12 |                                                                                                                                              |                                                                                                                                                                               |                    |                     |                          |
| 13 | 1                                                                                                                                            | Role of angiotensin-converting enzyme (ACE and ACE2) imbalance on tourniquet-induced remote kidney injury in a mouse hindlimb ischemia-reperfusion model                      | Yang XH et al.     | 22580272            | Non-human study          |
| 14 |                                                                                                                                              |                                                                                                                                                                               |                    |                     |                          |
| 15 |                                                                                                                                              |                                                                                                                                                                               |                    |                     |                          |
| 16 | 1                                                                                                                                            | Renal redox-sensitive signaling, but not blood pressure, is attenuated by Nox1 knockout in angiotensin II-dependent chronic hypertension                                      | Yogi A et al.      | 18195161            | Non-human study          |
| 17 |                                                                                                                                              |                                                                                                                                                                               |                    |                     |                          |
| 18 |                                                                                                                                              |                                                                                                                                                                               |                    |                     |                          |
| 19 |                                                                                                                                              |                                                                                                                                                                               |                    |                     |                          |
| 20 | 1                                                                                                                                            | Signal transduction through Ca <sup>2+</sup> /calmodulin-dependent Ras-GTPase and protein kinase II contributes to development of diabetes-induced renal vascular dysfunction | Yousif MH          | 16287213            | Non-human study          |
| 21 |                                                                                                                                              |                                                                                                                                                                               |                    |                     |                          |
| 22 |                                                                                                                                              |                                                                                                                                                                               |                    |                     |                          |
| 23 | 1                                                                                                                                            | Cosegregation of spontaneously hypertensive rat renin gene with elevated blood pressure in an F-2 generation                                                                  | Yu H et al.        | 9794718             | Non-human study          |
| 24 |                                                                                                                                              |                                                                                                                                                                               |                    |                     |                          |
| 25 |                                                                                                                                              |                                                                                                                                                                               |                    |                     |                          |
| 26 | 1                                                                                                                                            | Add-on angiotensin receptor blockade with maximized ACE inhibition                                                                                                            | Agarwal R          | 11380832            | Not a case-control study |
| 27 |                                                                                                                                              |                                                                                                                                                                               |                    |                     |                          |
| 28 |                                                                                                                                              |                                                                                                                                                                               |                    |                     |                          |
| 29 | 1                                                                                                                                            | Angiotensin-converting enzyme genotype is a predictive factor in the peak panel-reactive antibody response                                                                    | Akçay A et al.     | 15013293            | Not a case-control study |
| 30 |                                                                                                                                              |                                                                                                                                                                               |                    |                     |                          |
| 31 |                                                                                                                                              |                                                                                                                                                                               |                    |                     |                          |
| 32 | 1                                                                                                                                            | Association of the genetic polymorphisms of the renin-angiotensin system and endothelial nitric oxide synthase with chronic renal transplant dysfunction                      | Akçay A et al.     | 15385810            | Not a case-control study |
| 33 |                                                                                                                                              |                                                                                                                                                                               |                    |                     |                          |
| 34 |                                                                                                                                              |                                                                                                                                                                               |                    |                     |                          |
| 35 | 1                                                                                                                                            | Major clinical trials of hypertension - What should be done next?                                                                                                             | Alderman MH et al. | WOS:000230012700001 | Not a case-control study |
| 36 |                                                                                                                                              |                                                                                                                                                                               |                    |                     |                          |
| 37 |                                                                                                                                              |                                                                                                                                                                               |                    |                     |                          |
| 38 | 1                                                                                                                                            | Allergic reaction related to ramipril use: a case report                                                                                                                      | Alencar RC et al.  | 20180980            | Not a case-control study |
| 39 |                                                                                                                                              |                                                                                                                                                                               |                    |                     |                          |
| 40 |                                                                                                                                              |                                                                                                                                                                               |                    |                     |                          |
| 41 |                                                                                                                                              |                                                                                                                                                                               |                    |                     |                          |
| 42 |                                                                                                                                              |                                                                                                                                                                               |                    |                     |                          |
| 43 |                                                                                                                                              |                                                                                                                                                                               |                    |                     |                          |
| 44 |                                                                                                                                              |                                                                                                                                                                               |                    |                     |                          |
| 45 |                                                                                                                                              |                                                                                                                                                                               |                    |                     |                          |
| 46 |                                                                                                                                              |                                                                                                                                                                               |                    |                     |                          |

|    |   |                                                                                                                                                                                      |                      |          |                          |
|----|---|--------------------------------------------------------------------------------------------------------------------------------------------------------------------------------------|----------------------|----------|--------------------------|
| 1  | 1 | CYP3A5 and ABCB1 genes and hypertension                                                                                                                                              | Bochud M et al.      | 19290795 | Not a case-control study |
| 2  | 1 | Disorders of mineralocorticoid synthesis                                                                                                                                             | Connell JMC et al.   | 11469810 | Not a case-control study |
| 3  | 1 | Whole-Genome Linkage and Association Scan in Primary, Nonsyndromic Vesicoureteric Reflux                                                                                             | Cordell HJ et al.    | 19959718 | Not a case-control study |
| 4  | 1 | Genetics of angiotensin I-converting enzyme                                                                                                                                          | Costerousse O et al. | 9247746  | Not a case-control study |
| 5  | 1 | Renin Angiotensin System and Cytokines in Chronic Kidney Disease: Clinical and Experimental Evidence                                                                                 | da Silva AAS et al.  | 28820061 | Not a case-control study |
| 6  | 1 | Association between two genetic polymorphisms of the renin-angiotensin-aldosterone system and diabetic nephropathy: a meta-analysis                                                  | Ding W et al.        | 21607620 | Not a case-control study |
| 7  | 1 | A systematic review and meta-analysis of the association between angiotensin II type 1 receptor A1166C gene polymorphism and myocardial infarction susceptibility                    | Feng X et al.        | 23178513 | Not a case-control study |
| 8  | 1 | Polymorphism of angiotensin converting enzyme, angiotensinogen, and angiotensin II type 1 receptor genes and end-stage renal failure in IgA nephropathy: IGARAS - A study of 274 men | Frimat L et al.      | 11053482 | Not a case-control study |
| 9  | 1 | HLA genes in ANCA-associated vasculitides                                                                                                                                            | Griffith ME et al.   | 9493788  | Not a case-control study |
| 10 | 1 | Antiproteinuric effect of candesartan cilexetil in Japanese subjects with type 2 diabetes and nephropathy                                                                            | Haneda M et al.      | 15364166 | Not a case-control study |
| 11 | 1 | Nonmodulation and essential hypertension                                                                                                                                             | Hollenberg NK et al. | 16672145 | Not a case-control study |
| 12 | 1 | Angiotensinogen genotype affects renal and adrenal responses to angiotensin II in essential hypertension                                                                             | Hopkins PN et al.    | 11997278 | Not a case-control study |
| 13 | 1 | Association between Angiotensin I-Converting Enzyme Insertion/Deletion Polymorphism and Prognosis of Kidney Transplantation: A Meta-Analysis                                         | Huang ZK et al.      | 26000752 | Not a case-control study |

|    |                                                                                                                                                                           |                                                                                                                                                                                                         |                     |                          |                          |
|----|---------------------------------------------------------------------------------------------------------------------------------------------------------------------------|---------------------------------------------------------------------------------------------------------------------------------------------------------------------------------------------------------|---------------------|--------------------------|--------------------------|
| 1  | Association of angiotensinogen gene M235T and angiotensin-converting enzyme gene I/D polymorphisms with essential hypertension in Han Chinese population: a meta-analysis | Ji LD et al.                                                                                                                                                                                            | 20087216            | Not a case-control study |                          |
| 2  |                                                                                                                                                                           |                                                                                                                                                                                                         |                     |                          |                          |
| 3  |                                                                                                                                                                           |                                                                                                                                                                                                         |                     |                          |                          |
| 4  |                                                                                                                                                                           |                                                                                                                                                                                                         |                     |                          |                          |
| 5  |                                                                                                                                                                           |                                                                                                                                                                                                         |                     |                          |                          |
| 6  |                                                                                                                                                                           |                                                                                                                                                                                                         |                     |                          |                          |
| 7  |                                                                                                                                                                           |                                                                                                                                                                                                         |                     |                          |                          |
| 8  |                                                                                                                                                                           |                                                                                                                                                                                                         |                     |                          |                          |
| 9  | 1                                                                                                                                                                         | The role of renin-angiotensin-aldosterone system genes in the progression of chronic kidney disease: findings from the Chronic Renal Insufficiency Cohort (CRIC) study.                                 | Kelly TN et al.     | 25906781                 | Not a case-control study |
| 10 |                                                                                                                                                                           |                                                                                                                                                                                                         |                     |                          |                          |
| 11 |                                                                                                                                                                           |                                                                                                                                                                                                         |                     |                          |                          |
| 12 | 1                                                                                                                                                                         | The Phenotypic Patterns of Essential Hypertension Are the Key to Identifying "High Blood Pressure" Genes                                                                                                | Korner PI           | 21208016                 | Not a case-control study |
| 13 |                                                                                                                                                                           |                                                                                                                                                                                                         |                     |                          |                          |
| 14 | 1                                                                                                                                                                         | Glucocorticoids Reduce Aberrant O-Glycosylation of IgA Nephropathy Patients                                                                                                                             | Kosztu P et al.     | 29529610                 | Not a case-control study |
| 15 |                                                                                                                                                                           |                                                                                                                                                                                                         |                     |                          |                          |
| 16 | 1                                                                                                                                                                         | Antihypertensive treatment modulates the association between the D/I ACE gene polymorphism and left ventricular hypertrophy: a meta-analysis                                                            | Kuznetsova T et al. | 10918550                 | Not a case-control study |
| 17 |                                                                                                                                                                           |                                                                                                                                                                                                         |                     |                          |                          |
| 18 |                                                                                                                                                                           |                                                                                                                                                                                                         |                     |                          |                          |
| 19 | 1                                                                                                                                                                         | The renoprotective effect of antihypertensive drugs                                                                                                                                                     | Locatelli F et al.  | 10048500                 | Not a case-control study |
| 20 |                                                                                                                                                                           |                                                                                                                                                                                                         |                     |                          |                          |
| 21 |                                                                                                                                                                           |                                                                                                                                                                                                         |                     |                          |                          |
| 22 | 1                                                                                                                                                                         | microRNAs in Essential Hypertension and Blood Pressure Regulation                                                                                                                                       | Marques FZ et al.   | 26663185                 | Not a case-control study |
| 23 |                                                                                                                                                                           |                                                                                                                                                                                                         |                     |                          |                          |
| 24 | 1                                                                                                                                                                         | Genetics and the prediction of complications in type 1 diabetes                                                                                                                                         | Marre M             | 10097900                 | Not a case-control study |
| 25 |                                                                                                                                                                           |                                                                                                                                                                                                         |                     |                          |                          |
| 26 | 1                                                                                                                                                                         | Improvement of nephrotic syndrome by intensive lipid-lowering therapy in a patient with lipoprotein glomerulopathy                                                                                      | Matsunaga A et al.  | 19603250                 | Not a case-control study |
| 27 |                                                                                                                                                                           |                                                                                                                                                                                                         |                     |                          |                          |
| 28 | 1                                                                                                                                                                         | Mechanisms of plasminogen activator inhibitor 1 action in stromal remodeling and related diseases                                                                                                       | Milenkovic J et al. | 29097819                 | Not a case-control study |
| 29 |                                                                                                                                                                           |                                                                                                                                                                                                         |                     |                          |                          |
| 30 | 1                                                                                                                                                                         | Angiotensinogen gene variation and renoprotective efficacy of renin-angiotensin system blockade in IgA nephropathy                                                                                      | Narita I et al.     | 12911556                 | Not a case-control study |
| 31 |                                                                                                                                                                           |                                                                                                                                                                                                         |                     |                          |                          |
| 32 | 1                                                                                                                                                                         | Angiotensin-I converting enzyme insertion/deletion polymorphism and its association with diabetic nephropathy: a meta-analysis of studies reported between 1994 and 2004 and comprising 14,727 subjects | Ng D et al.         | 15830182                 | Not a case-control study |
| 33 |                                                                                                                                                                           |                                                                                                                                                                                                         |                     |                          |                          |
| 34 |                                                                                                                                                                           |                                                                                                                                                                                                         |                     |                          |                          |
| 35 |                                                                                                                                                                           |                                                                                                                                                                                                         |                     |                          |                          |
| 36 |                                                                                                                                                                           |                                                                                                                                                                                                         |                     |                          |                          |
| 37 |                                                                                                                                                                           |                                                                                                                                                                                                         |                     |                          |                          |
| 38 |                                                                                                                                                                           |                                                                                                                                                                                                         |                     |                          |                          |
| 39 |                                                                                                                                                                           |                                                                                                                                                                                                         |                     |                          |                          |
| 40 |                                                                                                                                                                           |                                                                                                                                                                                                         |                     |                          |                          |
| 41 |                                                                                                                                                                           |                                                                                                                                                                                                         |                     |                          |                          |
| 42 |                                                                                                                                                                           |                                                                                                                                                                                                         |                     |                          |                          |
| 43 |                                                                                                                                                                           |                                                                                                                                                                                                         |                     |                          |                          |
| 44 |                                                                                                                                                                           |                                                                                                                                                                                                         |                     |                          |                          |
| 45 |                                                                                                                                                                           |                                                                                                                                                                                                         |                     |                          |                          |
| 46 |                                                                                                                                                                           |                                                                                                                                                                                                         |                     |                          |                          |

|    |                                                                                                                                                                                                                                  |                                                                                                                                                                                                                          |                           |                          |                          |
|----|----------------------------------------------------------------------------------------------------------------------------------------------------------------------------------------------------------------------------------|--------------------------------------------------------------------------------------------------------------------------------------------------------------------------------------------------------------------------|---------------------------|--------------------------|--------------------------|
| 1  | Is the presence of retinopathy of practical value in defining cases of diabetic nephropathy in genetic association studies? The experience with the ACE insertion/deletion polymorphism in 53 studies comprising 17,791 subjects | Ng DPK et al.                                                                                                                                                                                                            | 18523141                  | Not a case-control study |                          |
| 2  |                                                                                                                                                                                                                                  |                                                                                                                                                                                                                          |                           |                          |                          |
| 3  |                                                                                                                                                                                                                                  |                                                                                                                                                                                                                          |                           |                          |                          |
| 4  |                                                                                                                                                                                                                                  |                                                                                                                                                                                                                          |                           |                          |                          |
| 5  |                                                                                                                                                                                                                                  |                                                                                                                                                                                                                          |                           |                          |                          |
| 6  |                                                                                                                                                                                                                                  |                                                                                                                                                                                                                          |                           |                          |                          |
| 7  |                                                                                                                                                                                                                                  |                                                                                                                                                                                                                          |                           |                          |                          |
| 8  | 1                                                                                                                                                                                                                                | Partial Deletion of the AGXT Gene (EX1_EX7del): A New Genotype in Hyperoxaluria Type 1                                                                                                                                   | Nogueira PK et al.        | 10737993                 | Not a case-control study |
| 9  |                                                                                                                                                                                                                                  |                                                                                                                                                                                                                          |                           |                          |                          |
| 10 |                                                                                                                                                                                                                                  |                                                                                                                                                                                                                          |                           |                          |                          |
| 11 | 1                                                                                                                                                                                                                                | A case of rapid amelioration of hepatitis C virus-associated cryoglobulinemic membranoproliferative glomerulonephritis treated by interferon-free directly acting antivirals for HCV in the absence of immunosuppressant | Obata F et al.            | 28509128                 | Not a case-control study |
| 12 |                                                                                                                                                                                                                                  |                                                                                                                                                                                                                          |                           |                          |                          |
| 13 |                                                                                                                                                                                                                                  |                                                                                                                                                                                                                          |                           |                          |                          |
| 14 |                                                                                                                                                                                                                                  |                                                                                                                                                                                                                          |                           |                          |                          |
| 15 | 1                                                                                                                                                                                                                                | Survival in type 2 diabetic patients in dialysis and the number of risk alleles in polymorphisms of the renin-angiotensin system genes                                                                                   | Padro-Miquel A et al.     | 19014923                 | Not a case-control study |
| 16 |                                                                                                                                                                                                                                  |                                                                                                                                                                                                                          |                           |                          |                          |
| 17 |                                                                                                                                                                                                                                  |                                                                                                                                                                                                                          |                           |                          |                          |
| 18 | 1                                                                                                                                                                                                                                | Normative genetic profiles of RAAS pathway gene Polymorphisms in north Indian and south Indian Populations                                                                                                               | Prasad P et al.           | 18027817                 | Not a case-control study |
| 19 |                                                                                                                                                                                                                                  |                                                                                                                                                                                                                          |                           |                          |                          |
| 20 |                                                                                                                                                                                                                                  |                                                                                                                                                                                                                          |                           |                          |                          |
| 21 | 1                                                                                                                                                                                                                                | Stress, Genes, and Hypertension. Contribution of the ISIAH Rat Strain Study                                                                                                                                              | Redina et al.             | 29909475                 | Not a case-control study |
| 22 |                                                                                                                                                                                                                                  |                                                                                                                                                                                                                          |                           |                          |                          |
| 23 | 1                                                                                                                                                                                                                                | A Synergistic Association of ACE I/D and eNOS G894T Gene Variants with the Progression of Immunoglobulin A Nephropathy - A Pilot Study                                                                                   | Rodriguez-Perez JC et al. | 19546528                 | Not a case-control study |
| 24 |                                                                                                                                                                                                                                  |                                                                                                                                                                                                                          |                           |                          |                          |
| 25 |                                                                                                                                                                                                                                  |                                                                                                                                                                                                                          |                           |                          |                          |
| 26 | 1                                                                                                                                                                                                                                | Diabetic nephropathy is associated with AGT polymorphism T235 - Results of a family-based study                                                                                                                          | Rogus JJ et al.           | 9461232                  | Not a case-control study |
| 27 |                                                                                                                                                                                                                                  |                                                                                                                                                                                                                          |                           |                          |                          |
| 28 |                                                                                                                                                                                                                                  |                                                                                                                                                                                                                          |                           |                          |                          |
| 29 | 1                                                                                                                                                                                                                                | Risk of developing diabetic nephropathy is not associated with synergism between the angiotensin II (type 1) receptor C-1166 allele and poor glycaemic control                                                           | Savage DA et al.          | 10328465                 | Not a case-control study |
| 30 |                                                                                                                                                                                                                                  |                                                                                                                                                                                                                          |                           |                          |                          |
| 31 |                                                                                                                                                                                                                                  |                                                                                                                                                                                                                          |                           |                          |                          |
| 32 | 1                                                                                                                                                                                                                                | ACE gene polymorphism and IgA nephropathy: An ethnically homogeneous study and a meta-analysis                                                                                                                           | Schena FP et al.          | 11473656                 | Not a case-control study |
| 33 |                                                                                                                                                                                                                                  |                                                                                                                                                                                                                          |                           |                          |                          |
| 34 |                                                                                                                                                                                                                                  |                                                                                                                                                                                                                          |                           |                          |                          |
| 35 | 1                                                                                                                                                                                                                                | Genetic determinants of diabetic renal disease and their impact on therapeutic interventions                                                                                                                             | Schmidt S et al.          | WOS:A1997YJ60500008      | Not a case-control study |
| 36 |                                                                                                                                                                                                                                  |                                                                                                                                                                                                                          |                           |                          |                          |
| 37 |                                                                                                                                                                                                                                  |                                                                                                                                                                                                                          |                           |                          |                          |
| 38 |                                                                                                                                                                                                                                  |                                                                                                                                                                                                                          |                           |                          |                          |
| 39 |                                                                                                                                                                                                                                  |                                                                                                                                                                                                                          |                           |                          |                          |
| 40 |                                                                                                                                                                                                                                  |                                                                                                                                                                                                                          |                           |                          |                          |
| 41 |                                                                                                                                                                                                                                  |                                                                                                                                                                                                                          |                           |                          |                          |
| 42 |                                                                                                                                                                                                                                  |                                                                                                                                                                                                                          |                           |                          |                          |
| 43 |                                                                                                                                                                                                                                  |                                                                                                                                                                                                                          |                           |                          |                          |
| 44 |                                                                                                                                                                                                                                  |                                                                                                                                                                                                                          |                           |                          |                          |
| 45 |                                                                                                                                                                                                                                  |                                                                                                                                                                                                                          |                           |                          |                          |
| 46 |                                                                                                                                                                                                                                  |                                                                                                                                                                                                                          |                           |                          |                          |



|    |                                                                                                                                                       |                            |          |                          |
|----|-------------------------------------------------------------------------------------------------------------------------------------------------------|----------------------------|----------|--------------------------|
| 1  | Impact of genetic polymorphisms of the renin-angiotensin system and of non-genetic factors on kidney transplant function - a single-center experience | Siekierka-Harreis M et al. | 19681973 | Not a case-control study |
| 2  |                                                                                                                                                       |                            |          |                          |
| 3  |                                                                                                                                                       |                            |          |                          |
| 4  |                                                                                                                                                       |                            |          |                          |
| 5  |                                                                                                                                                       |                            |          |                          |
| 6  |                                                                                                                                                       |                            |          |                          |
| 7  |                                                                                                                                                       |                            |          |                          |
| 8  |                                                                                                                                                       |                            |          |                          |
| 9  |                                                                                                                                                       |                            |          |                          |
| 10 |                                                                                                                                                       |                            |          |                          |
| 11 |                                                                                                                                                       |                            |          |                          |
| 12 |                                                                                                                                                       |                            |          |                          |
| 13 |                                                                                                                                                       |                            |          |                          |
| 14 |                                                                                                                                                       |                            |          |                          |
| 15 |                                                                                                                                                       |                            |          |                          |
| 16 |                                                                                                                                                       |                            |          |                          |
| 17 |                                                                                                                                                       |                            |          |                          |
| 18 |                                                                                                                                                       |                            |          |                          |
| 19 |                                                                                                                                                       |                            |          |                          |
| 20 |                                                                                                                                                       |                            |          |                          |
| 21 |                                                                                                                                                       |                            |          |                          |
| 22 |                                                                                                                                                       |                            |          |                          |
| 23 |                                                                                                                                                       |                            |          |                          |
| 24 |                                                                                                                                                       |                            |          |                          |
| 25 |                                                                                                                                                       |                            |          |                          |
| 26 |                                                                                                                                                       |                            |          |                          |
| 27 |                                                                                                                                                       |                            |          |                          |
| 28 |                                                                                                                                                       |                            |          |                          |
| 29 |                                                                                                                                                       |                            |          |                          |
| 30 |                                                                                                                                                       |                            |          |                          |
| 31 |                                                                                                                                                       |                            |          |                          |
| 32 |                                                                                                                                                       |                            |          |                          |
| 33 |                                                                                                                                                       |                            |          |                          |
| 34 |                                                                                                                                                       |                            |          |                          |
| 35 |                                                                                                                                                       |                            |          |                          |
| 36 |                                                                                                                                                       |                            |          |                          |
| 37 |                                                                                                                                                       |                            |          |                          |
| 38 |                                                                                                                                                       |                            |          |                          |
| 39 |                                                                                                                                                       |                            |          |                          |
| 40 |                                                                                                                                                       |                            |          |                          |
| 41 |                                                                                                                                                       |                            |          |                          |
| 42 |                                                                                                                                                       |                            |          |                          |
| 43 |                                                                                                                                                       |                            |          |                          |
| 44 |                                                                                                                                                       |                            |          |                          |
| 45 |                                                                                                                                                       |                            |          |                          |
| 46 |                                                                                                                                                       |                            |          |                          |

|    |   |                                                                                                                                                                                          |                      |                     |                           |
|----|---|------------------------------------------------------------------------------------------------------------------------------------------------------------------------------------------|----------------------|---------------------|---------------------------|
| 1  | 1 | Variants in blood pressure genes and the risk of renal cell carcinoma                                                                                                                    | Andreotti G et al.   | 20047954            | Not a renal disease focus |
| 2  | 1 | Association of angiotensin II type 1 receptor gene A1166C polymorphism with the presence of diabetes mellitus and metabolic syndrome in patients with documented coronary artery disease | Assali A et al.      | 21570644            | Not a renal disease focus |
| 3  | 1 | Germline genetic variations at 11q13 and 12p11 locus modulate age at onset for renal cell carcinoma.                                                                                     | Audenet F et al.     | 23911636            | Not a renal disease focus |
| 4  | 1 | Angiotensinogen M235T and angiotensin-converting enzyme I/D gene polymorphism and their association with type 2 diabetes in Egypt                                                        | Badr S et al.        | WOS:000309728600182 | Not a renal disease focus |
| 5  | 1 | Polymorphism in angiotensin II receptor genes and hypertension                                                                                                                           | Baudin B             | 15640279            | Not a renal disease focus |
| 6  | 1 | Analyses of mutations in the human renal kallikrein (hKLK1) gene and their possible relevance to blood pressure regulation and risk of myocardial infarction                             | Berge KE et al.      | 9298743             | Not a renal disease focus |
| 7  | 1 | Single Strand Conformation Polymorphism (SSCP) as a quick and reliable method to genotype M235T polymorphism of angiotensinogen gene                                                     | Bettinaglio P et al. | 12270765            | Not a renal disease focus |
| 8  | 1 | Polymorphisms of the renin-angiotensin system in patients with multifocal renal arterial fibromuscular dysplasia                                                                         | Bofinger A et al.    | 11317203            | Not a renal disease focus |
| 9  | 1 | Association between plasma activities of semicarbazide-sensitive amine oxidase and angiotensin-converting enzyme in patients with type 1 diabetes mellitus.                              | Boomsma F et al.     | 15830186            | Not a renal disease focus |
| 10 | 1 | Can the choice of diet undermine the potential genetic risk of AT1R 1166A>C gene polymorphism?                                                                                           | Bozina T et al.      | 30205174            | Not a renal disease focus |
| 11 | 1 | Structure-Based Analysis of Single Nucleotide Variants in the Renin-Angiotensinogen Complex                                                                                              | Brown DK et al.      | 28302554            | Not a renal disease focus |
| 12 | 1 | Interactions between serotonin and endogenous and exogenous noradrenaline in the human forearm.                                                                                          | Bruning TA et al.    | 7866595             | Not a renal disease focus |

|    |                                                                                                |                                                                                                                                                                  |                          |                           |                           |
|----|------------------------------------------------------------------------------------------------|------------------------------------------------------------------------------------------------------------------------------------------------------------------|--------------------------|---------------------------|---------------------------|
| 1  | Renin-angiotensin system gene polymorphisms: assessment of the risk of coronary heart disease. | Buraczyńska M et al.                                                                                                                                             | 14502296                 | Not a renal disease focus |                           |
| 2  |                                                                                                |                                                                                                                                                                  |                          |                           |                           |
| 3  |                                                                                                |                                                                                                                                                                  |                          |                           |                           |
| 4  | 1                                                                                              | Oxidative stress-related factors in Bartter's and Gitelman's syndromes: relevance for angiotensin II signalling.                                                 | Calo LA et al.           | 12897089                  | Not a renal disease focus |
| 5  |                                                                                                |                                                                                                                                                                  |                          |                           |                           |
| 6  | 1                                                                                              | alpha(1)-antitrypsin (AAT) deficiency and ANCA-positive systemic vasculitis: genetic and clinical implications                                                   | Callea F et al.          | 9279535                   | Not a renal disease focus |
| 7  |                                                                                                |                                                                                                                                                                  |                          |                           |                           |
| 8  | 1                                                                                              | Evaluation of Alpha-1 Antitrypsin Levels and SERPINA1 Gene Polymorphisms in Sickle Cell Disease                                                                  | Carvalho MOS et al.      | 29163550                  | Not a renal disease focus |
| 9  |                                                                                                |                                                                                                                                                                  |                          |                           |                           |
| 10 | 1                                                                                              | Role of GRK4 in the Regulation of Arterial AT(1) Receptor in Hypertension                                                                                        | Chen K et al.            | 24218433                  | Not a renal disease focus |
| 11 |                                                                                                |                                                                                                                                                                  |                          |                           |                           |
| 12 | 1                                                                                              | A study on the association between angiotensin-I converting enzyme I/D dimorphism and type-2 diabetes mellitus.                                                  | Chmaisse HN et al.       | 19861867                  | Not a renal disease focus |
| 13 |                                                                                                |                                                                                                                                                                  |                          |                           |                           |
| 14 | 1                                                                                              | alpha-adducin and angiotensin I-converting enzyme polymorphisms in essential hypertension                                                                        | Clark CJ et al.          | 11116113                  | Not a renal disease focus |
| 15 |                                                                                                |                                                                                                                                                                  |                          |                           |                           |
| 16 | 1                                                                                              | Elevated urinary albumin excretion is not linked to the angiotensin I-converting enzyme gene polymorphism in clinically healthy subjects                         | Clausen P et al.         | 10872702                  | Not a renal disease focus |
| 17 |                                                                                                |                                                                                                                                                                  |                          |                           |                           |
| 18 | 1                                                                                              | Role of ACE inhibitors in patients with diabetes mellitus                                                                                                        | Cordonnier DJ et al.     | 11708761                  | Not a renal disease focus |
| 19 |                                                                                                |                                                                                                                                                                  |                          |                           |                           |
| 20 | 1                                                                                              | Molecular genetics of the renin-angiotensin-aldosterone system in human hypertension                                                                             | Corvol P et al.          | 9296068                   | Not a renal disease focus |
| 21 |                                                                                                |                                                                                                                                                                  |                          |                           |                           |
| 22 | 1                                                                                              | Angiotensin I-converting enzyme (kininase II) in cardiovascular and renal regulations and diseases                                                               | Costerousse O et al.     | 9830503                   | Not a renal disease focus |
| 23 |                                                                                                |                                                                                                                                                                  |                          |                           |                           |
| 24 | 1                                                                                              | Functional polymorphisms in genes of the Angiotensin and Serotonin systems and risk of hypertrophic cardiomyopathy: AT1R as a potential modifier.                | Coto E et al.            | 20594303                  | Not a renal disease focus |
| 25 |                                                                                                |                                                                                                                                                                  |                          |                           |                           |
| 26 | 1                                                                                              | SNP Variants in RET and PAX2 and Their Possible Contribution to the Primary Hyperoxaluria Type 1 Phenotype                                                       | Coulter-Mackie MB        | 25854853                  | Not a renal disease focus |
| 27 |                                                                                                |                                                                                                                                                                  |                          |                           |                           |
| 28 | 1                                                                                              | Overexpression of human alanine:glyoxylate aminotransferase in Escherichia coli: renaturation from guanidine-HCl and affinity for pyridoxal phosphate co-factor. | Coulter-Mackie MB et al. | 15802217                  | Not a renal disease focus |
| 29 |                                                                                                |                                                                                                                                                                  |                          |                           |                           |
| 30 |                                                                                                |                                                                                                                                                                  |                          |                           |                           |
| 31 |                                                                                                |                                                                                                                                                                  |                          |                           |                           |
| 32 |                                                                                                |                                                                                                                                                                  |                          |                           |                           |
| 33 |                                                                                                |                                                                                                                                                                  |                          |                           |                           |
| 34 |                                                                                                |                                                                                                                                                                  |                          |                           |                           |
| 35 |                                                                                                |                                                                                                                                                                  |                          |                           |                           |
| 36 |                                                                                                |                                                                                                                                                                  |                          |                           |                           |
| 37 |                                                                                                |                                                                                                                                                                  |                          |                           |                           |
| 38 |                                                                                                |                                                                                                                                                                  |                          |                           |                           |
| 39 |                                                                                                |                                                                                                                                                                  |                          |                           |                           |
| 40 |                                                                                                |                                                                                                                                                                  |                          |                           |                           |
| 41 |                                                                                                |                                                                                                                                                                  |                          |                           |                           |
| 42 |                                                                                                |                                                                                                                                                                  |                          |                           |                           |
| 43 |                                                                                                |                                                                                                                                                                  |                          |                           |                           |
| 44 |                                                                                                |                                                                                                                                                                  |                          |                           |                           |
| 45 |                                                                                                |                                                                                                                                                                  |                          |                           |                           |
| 46 |                                                                                                |                                                                                                                                                                  |                          |                           |                           |

|   |                                                                                                                                                                                              |                          |          |                           |
|---|----------------------------------------------------------------------------------------------------------------------------------------------------------------------------------------------|--------------------------|----------|---------------------------|
| 1 | The major allele of the alanine:glyoxylate aminotransferase gene: nine novel mutations and polymorphisms associated with primary hyperoxaluria type 1.                                       | Coulter-Mackie MB et al. | 15963748 | Not a renal disease focus |
| 1 | Mutation-based diagnostic testing for primary hyperoxaluria type 1: survey of results.                                                                                                       | Coulter-Mackie MB et al. | 18282470 | Not a renal disease focus |
| 1 | Further studies on the activity and subcellular distribution of alanine:glyoxylate aminotransferase in the livers of patients with primary hyperoxaluria type 1.                             | Danpure CJ et al.        | 3416563  | Not a renal disease focus |
| 1 | Alanine : glyoxylate aminotransferase peroxisome-to-mitochondrion mistargeting in human hereditary kidney stone disease                                                                      | Danpure CJ et al.        | 12686111 | Not a renal disease focus |
| 1 | Insertion/Deletion Polymorphism of Angiotensin I-converting Enzyme Gene Is Linked With Chromophobe Renal Cell Carcinoma                                                                      | de Martino M et al.      | 21477733 | Not a renal disease focus |
| 1 | Polymorphisms in genes of the renin-angiotensin-aldosterone system and renal cell cancer risk: Interplay with hypertension and intakes of sodium, potassium and fluid                        | Deckers IA et al.        | 24978482 | Not a renal disease focus |
| 1 | ACE gene insertion/deletion polymorphism modulates capillary permeability in hypertension                                                                                                    | Dell'omo G et al.        | 16889537 | Not a renal disease focus |
| 1 | Single nucleotide polymorphism of adiponectin +276 G/T is associated with the susceptibility to essential hypertension in a Turkish population.                                              | Demir AK et al.          | 27936341 | Not a renal disease focus |
| 1 | Genetic polymorphisms associated with exertional rhabdomyolysis                                                                                                                              | Deuster PA et al.        | 23543093 | Not a renal disease focus |
| 1 | Vasodilator-derived nitric oxide inhibits fetal calf serum- and angiotensin-II-induced growth of renal arteriolar smooth muscle cells                                                        | Dubey RK et al.          | 8169847  | Not a renal disease focus |
| 1 | The angiotensin I-converting enzyme gene insertion/deletion polymorphism is linked to early gastric cancer                                                                                   | Ebert MPA et al.         | 16365022 | Not a renal disease focus |
| 1 | A new theory of essential hypertension based on analysis of the association between a polymorphism of the alpha(2)-adrenoceptor at the 10q24-q26 locus and hypertension in African-Americans | Eggers AE                | 26243176 | Not a renal disease focus |

|    |   |                                                                                                                                                                                                         |                     |          |                           |
|----|---|---------------------------------------------------------------------------------------------------------------------------------------------------------------------------------------------------------|---------------------|----------|---------------------------|
| 1  | 1 | CYP3A5 genotype is associated with elevated blood pressure.                                                                                                                                             | Fromm MF et al.     | 16141800 | Not a renal disease focus |
| 2  | 1 | Functional variant of CYP4A11 20-hydroxyeicosatetraenoic acid synthase is associated with essential hypertension                                                                                        | Gainer JV et al.    | 15611369 | Not a renal disease focus |
| 3  | 1 | The interaction of AGT and NOS3 gene polymorphisms with conventional risk factors increases predisposition to hypertension                                                                              | Gatti RR et al.     | 22791701 | Not a renal disease focus |
| 4  | 1 | Somatic Von Hippel-Lindau Mutation In Clear-Cell Papillary Cystadenoma Of The Epididymis                                                                                                                | Gilcrease MZ et al. | 8522307  | Not a renal disease focus |
| 5  | 1 | Phenotype-genotype analysis in two Chinese families with Liddle syndrome.                                                                                                                               | Gong L et al.       | 24474657 | Not a renal disease focus |
| 6  | 1 | alpha(1)-Antitrypsin Deficiency in Fraternal Twins Born With Familial Spontaneous Pneumothorax                                                                                                          | Greene DN et al.    | 22215832 | Not a renal disease focus |
| 7  | 1 | C-antineutrophil cytoplasmic antibody positivity in vasculitis patients is associated with the Z allele of alpha-1-antitrypsin, and P-antineutrophil cytoplasmic antibody positivity with the S allele. | Griffith ME et al.  | 8671812  | Not a renal disease focus |
| 8  | 1 | Potential Benefits of Rho-kinase Inhibition in Arterial Hypertension                                                                                                                                    | Grisk O             | 23852615 | Not a renal disease focus |
| 9  | 1 | A Computational Model of the Circulating Renin-Angiotensin System and Blood Pressure Regulation                                                                                                         | Guillaud F et al.   | 20683640 | Not a renal disease focus |
| 10 | 1 | The presence of PAI-1 4G/5G and ACE DD genotypes increases the risk of early-stage AVF thrombosis in hemodialysis patients.                                                                             | Gungor Y et al.     | 21332339 | Not a renal disease focus |
| 11 | 1 | Renin-aldosterone response, urinary Na/K ratio and growth in pseudohypoaldosteronism patients with mutations in epithelial sodium channel (ENaC) subunit genes                                          | Hanukoglu A et al.  | 18634878 | Not a renal disease focus |
| 12 | 1 | Blunted renal vascular response to angiotensin II is associated with a common Variant of the angiotensinogen gene and obesity                                                                           | Hopkins PN et al.   | 8728297  | Not a renal disease focus |
| 13 | 1 | Vitamin B6 in Primary Hyperoxaluria I: First Prospective Trial after 40 Years of Practice                                                                                                               | Hoyer-Kuhn H et al. | 24385516 | Not a renal disease focus |

|   |                                                                                                                                                                                             |                     |                     |                           |
|---|---------------------------------------------------------------------------------------------------------------------------------------------------------------------------------------------|---------------------|---------------------|---------------------------|
| 1 | Genetic variation of the renin-angiotensin system and chronic kidney disease progression in black individuals in the atherosclerosis risk in communities study                              | Hsu CCC et al.      | 16396964            | Not a renal disease focus |
| 1 | Clinical and Genetic Factors Associated With Thiazide-Induced Hyponatremia.                                                                                                                 | Huang CC et al.     | 26313793            | Not a renal disease focus |
| 1 | A case control association study of ACE gene polymorphism (I/D) with hypertension in Punjabi population from Faisalabad, Pakistan                                                           | Hussain M et al.    | 29058472            | Not a renal disease focus |
| 1 | Genetic variant of the renin-angiotensin system and prevalence of type 2 diabetes mellitus: a modest but significant effect of aldosterone synthase                                         | Ichikawa M et al.   | 24549414            | Not a renal disease focus |
| 1 | No association between alpha-adducin 460 polymorphism and essential hypertension in a Japanese population                                                                                   | Ishikawa K et al.   | 9607391             | Not a renal disease focus |
| 1 | Renin-Angiotensin System Gene Variants and Type 2 Diabetes Mellitus: Influence of Angiotensinogen                                                                                           | Joyce-Tan SM et al. | WOS:000370250500001 | Not a renal disease focus |
| 1 | Lack of association between the alpha-adducin locus and essential hypertension in the Japanese population                                                                                   | Kato N et al.       | 9495254             | Not a renal disease focus |
| 1 | Comprehensive analysis of the renin-angiotensin gene polymorphisms with relation to hypertension in the Japanese                                                                            | Kato N et al.       | 10953993            | Not a renal disease focus |
| 1 | Lys(173)Arg and -344T/C variants of CYP11B2 in Japanese patients with low-renin hypertension.                                                                                               | Komiya I et al.     | 10720581            | Not a renal disease focus |
| 1 | Molecular-Biology Of Hypertension                                                                                                                                                           | Krieger Je et al.   | WOS:A1991GF39900002 | Not a renal disease focus |
| 1 | Effects of angiotensin-converting enzyme gene polymorphism and serum vitamin D levels on ambulatory blood pressure measurement and left ventricular mass in Turkish hypertensive population | Kulah E et al.      | 17625392            | Not a renal disease focus |
| 1 | Efficacy of Korean Red Ginseng by Single Nucleotide Polymorphism in Obese Women: Randomized, Double-blind, Placebo-controlled Trial                                                         | Kwon DH et al.      | 23717118            | Not a renal disease focus |
| 1 | Serum liver enzymes in Turner syndrome                                                                                                                                                      | Larizza D et al.    | 10664223            | Not a renal disease focus |

|    |                                                                                                                                                                                                    |             |          |                           |
|----|----------------------------------------------------------------------------------------------------------------------------------------------------------------------------------------------------|-------------|----------|---------------------------|
| 1  | Risk given by AGT polymorphisms in inducing susceptibility to essential hypertension among isolated populations from a remote region of China: A case-control study among the isolated populations | Li Q et al. | 26391364 | Not a renal disease focus |
| 2  |                                                                                                                                                                                                    |             |          |                           |
| 3  |                                                                                                                                                                                                    |             |          |                           |
| 4  |                                                                                                                                                                                                    |             |          |                           |
| 5  |                                                                                                                                                                                                    |             |          |                           |
| 6  |                                                                                                                                                                                                    |             |          |                           |
| 7  |                                                                                                                                                                                                    |             |          |                           |
| 8  |                                                                                                                                                                                                    |             |          |                           |
| 9  |                                                                                                                                                                                                    |             |          |                           |
| 10 |                                                                                                                                                                                                    |             |          |                           |
| 11 |                                                                                                                                                                                                    |             |          |                           |
| 12 |                                                                                                                                                                                                    |             |          |                           |
| 13 |                                                                                                                                                                                                    |             |          |                           |
| 14 |                                                                                                                                                                                                    |             |          |                           |
| 15 |                                                                                                                                                                                                    |             |          |                           |
| 16 |                                                                                                                                                                                                    |             |          |                           |
| 17 |                                                                                                                                                                                                    |             |          |                           |
| 18 |                                                                                                                                                                                                    |             |          |                           |
| 19 |                                                                                                                                                                                                    |             |          |                           |
| 20 |                                                                                                                                                                                                    |             |          |                           |
| 21 |                                                                                                                                                                                                    |             |          |                           |
| 22 |                                                                                                                                                                                                    |             |          |                           |
| 23 |                                                                                                                                                                                                    |             |          |                           |
| 24 |                                                                                                                                                                                                    |             |          |                           |
| 25 |                                                                                                                                                                                                    |             |          |                           |
| 26 |                                                                                                                                                                                                    |             |          |                           |
| 27 |                                                                                                                                                                                                    |             |          |                           |
| 28 |                                                                                                                                                                                                    |             |          |                           |
| 29 |                                                                                                                                                                                                    |             |          |                           |
| 30 |                                                                                                                                                                                                    |             |          |                           |
| 31 |                                                                                                                                                                                                    |             |          |                           |
| 32 |                                                                                                                                                                                                    |             |          |                           |
| 33 |                                                                                                                                                                                                    |             |          |                           |
| 34 |                                                                                                                                                                                                    |             |          |                           |
| 35 |                                                                                                                                                                                                    |             |          |                           |
| 36 |                                                                                                                                                                                                    |             |          |                           |
| 37 |                                                                                                                                                                                                    |             |          |                           |
| 38 |                                                                                                                                                                                                    |             |          |                           |
| 39 |                                                                                                                                                                                                    |             |          |                           |
| 40 |                                                                                                                                                                                                    |             |          |                           |
| 41 |                                                                                                                                                                                                    |             |          |                           |
| 42 |                                                                                                                                                                                                    |             |          |                           |
| 43 |                                                                                                                                                                                                    |             |          |                           |
| 44 |                                                                                                                                                                                                    |             |          |                           |
| 45 |                                                                                                                                                                                                    |             |          |                           |
| 46 |                                                                                                                                                                                                    |             |          |                           |

|    |                                                                                                                                          |               |          |                           |
|----|------------------------------------------------------------------------------------------------------------------------------------------|---------------|----------|---------------------------|
| 1  | Association of polymorphisms of angiotensin I converting enzyme 2 with retinopathy in type 2 diabetes mellitus among Chinese individuals | Meng N et al. | 25359286 | Not a renal disease focus |
| 2  |                                                                                                                                          |               |          |                           |
| 3  |                                                                                                                                          |               |          |                           |
| 4  |                                                                                                                                          |               |          |                           |
| 5  |                                                                                                                                          |               |          |                           |
| 6  |                                                                                                                                          |               |          |                           |
| 7  |                                                                                                                                          |               |          |                           |
| 8  |                                                                                                                                          |               |          |                           |
| 9  |                                                                                                                                          |               |          |                           |
| 10 |                                                                                                                                          |               |          |                           |
| 11 |                                                                                                                                          |               |          |                           |
| 12 |                                                                                                                                          |               |          |                           |
| 13 |                                                                                                                                          |               |          |                           |
| 14 |                                                                                                                                          |               |          |                           |
| 15 |                                                                                                                                          |               |          |                           |
| 16 |                                                                                                                                          |               |          |                           |
| 17 |                                                                                                                                          |               |          |                           |
| 18 |                                                                                                                                          |               |          |                           |
| 19 |                                                                                                                                          |               |          |                           |
| 20 |                                                                                                                                          |               |          |                           |
| 21 |                                                                                                                                          |               |          |                           |
| 22 |                                                                                                                                          |               |          |                           |
| 23 |                                                                                                                                          |               |          |                           |
| 24 |                                                                                                                                          |               |          |                           |
| 25 |                                                                                                                                          |               |          |                           |
| 26 |                                                                                                                                          |               |          |                           |
| 27 |                                                                                                                                          |               |          |                           |
| 28 |                                                                                                                                          |               |          |                           |
| 29 |                                                                                                                                          |               |          |                           |
| 30 |                                                                                                                                          |               |          |                           |
| 31 |                                                                                                                                          |               |          |                           |
| 32 |                                                                                                                                          |               |          |                           |
| 33 |                                                                                                                                          |               |          |                           |
| 34 |                                                                                                                                          |               |          |                           |
| 35 |                                                                                                                                          |               |          |                           |
| 36 |                                                                                                                                          |               |          |                           |
| 37 |                                                                                                                                          |               |          |                           |
| 38 |                                                                                                                                          |               |          |                           |
| 39 |                                                                                                                                          |               |          |                           |
| 40 |                                                                                                                                          |               |          |                           |
| 41 |                                                                                                                                          |               |          |                           |
| 42 |                                                                                                                                          |               |          |                           |
| 43 |                                                                                                                                          |               |          |                           |
| 44 |                                                                                                                                          |               |          |                           |
| 45 |                                                                                                                                          |               |          |                           |
| 46 |                                                                                                                                          |               |          |                           |



|    |                                                                                                                                     |                                                                                                                                                                                              |                             |                           |                           |
|----|-------------------------------------------------------------------------------------------------------------------------------------|----------------------------------------------------------------------------------------------------------------------------------------------------------------------------------------------|-----------------------------|---------------------------|---------------------------|
| 1  | Angiotensin converting enzyme (ACE) insertion/deletion (I/D) polymorphism, and diabetic retinopathy in subjects with IDDM and NIDDM | Nagi Dk et al.                                                                                                                                                                               | 8582133                     | Not a renal disease focus |                           |
| 2  |                                                                                                                                     |                                                                                                                                                                                              |                             |                           |                           |
| 3  |                                                                                                                                     |                                                                                                                                                                                              |                             |                           |                           |
| 4  | 1                                                                                                                                   | Association between RAS gene polymorphisms (ACE I/D, AGT M235T) and Henoch-Schonlein purpura in a Turkish population                                                                         | Nalbantoglu S et al.        | 23151617                  | Not a renal disease focus |
| 5  |                                                                                                                                     |                                                                                                                                                                                              |                             |                           |                           |
| 6  | 1                                                                                                                                   | Enhanced renal production of cyclic GMP and reduced free water clearance during sodium nitroprusside infusion in healthy man                                                                 | Nielsen CB et al.           | 8393795                   | Not a renal disease focus |
| 7  |                                                                                                                                     |                                                                                                                                                                                              |                             |                           |                           |
| 8  | 1                                                                                                                                   | Alpha-1-proteinase inhibitor and pulmonary haemorrhage in systemic vasculitis.                                                                                                               | O'Donoghue DJ et al.        | 8296629                   | Not a renal disease focus |
| 9  |                                                                                                                                     |                                                                                                                                                                                              |                             |                           |                           |
| 10 | 1                                                                                                                                   | Genetic polymorphisms of the renin-angiotensin system and atheromatous renal artery stenosis                                                                                                 | Olivieri O et al.           | 10567188                  | Not a renal disease focus |
| 11 |                                                                                                                                     |                                                                                                                                                                                              |                             |                           |                           |
| 12 | 1                                                                                                                                   | Endothelial nitric oxide synthase gene/gender interactions and the renal hemodynamic response to angiotensin II                                                                              | Page A et al.               | 16093452                  | Not a renal disease focus |
| 13 |                                                                                                                                     |                                                                                                                                                                                              |                             |                           |                           |
| 14 | 1                                                                                                                                   | Angiotensin-converting enzyme and angiotensin II receptor subtype 2 genotypes in type 1 diabetes and severe hypoglycaemia requiring emergency treatment: a case cohort study                 | Pedersen-Bjergaard U et al. | 19820429                  | Not a renal disease focus |
| 15 |                                                                                                                                     |                                                                                                                                                                                              |                             |                           |                           |
| 16 | 1                                                                                                                                   | Deep-targeted exon sequencing reveals renal polymorphisms associate with postexercise hypotension among African Americans                                                                    | Pescatello LS et al.        | WOS:000387445200013       | Not a renal disease focus |
| 17 |                                                                                                                                     |                                                                                                                                                                                              |                             |                           |                           |
| 18 | 1                                                                                                                                   | Impact of maternal angiotensinogen M235T polymorphism and angiotensin-converting enzyme insertion/deletion polymorphism on blood pressure, protein excretion and fetal outcome in pregnancy. | Pfab T et al.               | 17563539                  | Not a renal disease focus |
| 19 |                                                                                                                                     |                                                                                                                                                                                              |                             |                           |                           |
| 20 | 1                                                                                                                                   | Effect of ACE inhibitors and beta-blockers on homocysteine levels in essential hypertension                                                                                                  | Poduri A et al.             | 18200034                  | Not a renal disease focus |
| 21 |                                                                                                                                     |                                                                                                                                                                                              |                             |                           |                           |
| 22 | 1                                                                                                                                   | The state and responsiveness of the renin-angiotensin-aldosterone system in patients with type II diabetes mellitus                                                                          | Price DA et al.             | 10232494                  | Not a renal disease focus |
| 23 |                                                                                                                                     |                                                                                                                                                                                              |                             |                           |                           |
| 24 | 1                                                                                                                                   | Identification of mutations associated with peroxisome-to-mitochondrion mistargeting of alanine/glyoxylate aminotransferase in primary hyperoxaluria type 1.                                 | Purdue PE et al.            | 1703535                   | Not a renal disease focus |
| 25 |                                                                                                                                     |                                                                                                                                                                                              |                             |                           |                           |
| 26 | 1                                                                                                                                   | The relationship between ACE/AGT gene polymorphisms and the risk of diabetic retinopathy in Chinese patients with type 2 diabetes.                                                           | Qiao YC et al.              | 29378484                  | Not a renal disease focus |
| 27 |                                                                                                                                     |                                                                                                                                                                                              |                             |                           |                           |
| 28 |                                                                                                                                     |                                                                                                                                                                                              |                             |                           |                           |
| 29 |                                                                                                                                     |                                                                                                                                                                                              |                             |                           |                           |
| 30 |                                                                                                                                     |                                                                                                                                                                                              |                             |                           |                           |
| 31 |                                                                                                                                     |                                                                                                                                                                                              |                             |                           |                           |
| 32 |                                                                                                                                     |                                                                                                                                                                                              |                             |                           |                           |
| 33 |                                                                                                                                     |                                                                                                                                                                                              |                             |                           |                           |
| 34 |                                                                                                                                     |                                                                                                                                                                                              |                             |                           |                           |
| 35 |                                                                                                                                     |                                                                                                                                                                                              |                             |                           |                           |
| 36 |                                                                                                                                     |                                                                                                                                                                                              |                             |                           |                           |
| 37 |                                                                                                                                     |                                                                                                                                                                                              |                             |                           |                           |
| 38 |                                                                                                                                     |                                                                                                                                                                                              |                             |                           |                           |
| 39 |                                                                                                                                     |                                                                                                                                                                                              |                             |                           |                           |
| 40 |                                                                                                                                     |                                                                                                                                                                                              |                             |                           |                           |
| 41 |                                                                                                                                     |                                                                                                                                                                                              |                             |                           |                           |
| 42 |                                                                                                                                     |                                                                                                                                                                                              |                             |                           |                           |
| 43 |                                                                                                                                     |                                                                                                                                                                                              |                             |                           |                           |
| 44 |                                                                                                                                     |                                                                                                                                                                                              |                             |                           |                           |
| 45 |                                                                                                                                     |                                                                                                                                                                                              |                             |                           |                           |
| 46 |                                                                                                                                     |                                                                                                                                                                                              |                             |                           |                           |

|    |                                                                                                                                                                                            |                           |          |                           |
|----|--------------------------------------------------------------------------------------------------------------------------------------------------------------------------------------------|---------------------------|----------|---------------------------|
| 1  | Association of angiotensin-converting enzyme gene dimorphisms with severity of lupus disease.                                                                                              | Rabbani MA et al.         | 18711292 | Not a renal disease focus |
| 2  |                                                                                                                                                                                            |                           |          |                           |
| 3  |                                                                                                                                                                                            |                           |          |                           |
| 4  |                                                                                                                                                                                            |                           |          |                           |
| 5  |                                                                                                                                                                                            |                           |          |                           |
| 6  | Association of angiotensinogen M235T and A(-6)G gene polymorphisms with coronary heart disease with independence of essential hypertension: the PROCAGENE study. Prospective Cardiac Gene. | Rodriquez-Perez JC et al. | 11345362 | Not a renal disease focus |
| 7  |                                                                                                                                                                                            |                           |          |                           |
| 8  |                                                                                                                                                                                            |                           |          |                           |
| 9  |                                                                                                                                                                                            |                           |          |                           |
| 10 |                                                                                                                                                                                            |                           |          |                           |
| 11 | Evaluation of mutation screening as a first line test for the diagnosis of the primary hyperoxalurias.                                                                                     | Rumsby G et al.           | 15327387 | Not a renal disease focus |
| 12 |                                                                                                                                                                                            |                           |          |                           |
| 13 |                                                                                                                                                                                            |                           |          |                           |
| 14 | Angiotensin II acutely attenuates range of arterial baroreflex control of renal sympathetic nerve activity                                                                                 | Sanderford MG et al.      | 11009467 | Not a renal disease focus |
| 15 |                                                                                                                                                                                            |                           |          |                           |
| 16 | An Erythropoietin Gene Polymorphism in the Hypoxia-Responsive Element at Position 3434 Is Possibly Associated with Hypertension                                                            | Schulz EG et al.          | 21912181 | Not a renal disease focus |
| 17 |                                                                                                                                                                                            |                           |          |                           |
| 18 | Ubiquitin ligase gp78 increases solubility and facilitates degradation of the Z variant of alpha-1-antitrypsin.                                                                            | Shen Y et al.             | 16979136 | Not a renal disease focus |
| 19 |                                                                                                                                                                                            |                           |          |                           |
| 20 | Association of APOE (Hha1) and ACE (I/D) gene polymorphisms with type 2 diabetes mellitus in North West India                                                                              | Singh PP et al.           | 16621107 | Not a renal disease focus |
| 21 |                                                                                                                                                                                            |                           |          |                           |
| 22 |                                                                                                                                                                                            |                           |          |                           |
| 23 | Renal haemodynamics are not related to genotypes in offspring of parents with essential hypertension                                                                                       | Skov K et al.             | 17083073 | Not a renal disease focus |
| 24 |                                                                                                                                                                                            |                           |          |                           |
| 25 | Association between renin-angiotensin-aldosterone system-related genes and blood pressure in a Korean population.                                                                          | Song SB et al.            | 21342026 | Not a renal disease focus |
| 26 |                                                                                                                                                                                            |                           |          |                           |
| 27 |                                                                                                                                                                                            |                           |          |                           |
| 28 | Angiotensin II sensitivity in nonpregnant formerly preeclamptic women and healthy parous controls                                                                                          | Spaanderman MEA et al.    | 15350256 | Not a renal disease focus |
| 29 |                                                                                                                                                                                            |                           |          |                           |
| 30 | The genetic predisposition to produce high levels of TGF-beta 1 impacts on the severity of eclampsia/pre-eclampsia                                                                         | Stanczuk GA et al.        | 17653872 | Not a renal disease focus |
| 31 |                                                                                                                                                                                            |                           |          |                           |
| 32 |                                                                                                                                                                                            |                           |          |                           |
| 33 | Angiotensin-converting enzyme gene I/D polymorphism in malignant hypertension                                                                                                              | Stefansson B et al.       | 10855732 | Not a renal disease focus |
| 34 |                                                                                                                                                                                            |                           |          |                           |
| 35 | A Polymorphism Regulates CYP4A11 Transcriptional Activity and Is Associated With Hypertension in a Japanese Population                                                                     | Sugimoto K et al.         | 18936345 | Not a renal disease focus |
| 36 |                                                                                                                                                                                            |                           |          |                           |
| 37 |                                                                                                                                                                                            |                           |          |                           |
| 38 |                                                                                                                                                                                            |                           |          |                           |
| 39 |                                                                                                                                                                                            |                           |          |                           |
| 40 |                                                                                                                                                                                            |                           |          |                           |
| 41 |                                                                                                                                                                                            |                           |          |                           |
| 42 |                                                                                                                                                                                            |                           |          |                           |
| 43 |                                                                                                                                                                                            |                           |          |                           |
| 44 |                                                                                                                                                                                            |                           |          |                           |
| 45 |                                                                                                                                                                                            |                           |          |                           |
| 46 |                                                                                                                                                                                            |                           |          |                           |

|    |                                                                                                                                                                                    |                         |                     |                           |
|----|------------------------------------------------------------------------------------------------------------------------------------------------------------------------------------|-------------------------|---------------------|---------------------------|
| 1  | Blunted cGMP response to agonists and enhanced glomerular cyclic 3',5'-nucleotide phosphodiesterase activities in experimental congestive heart failure                            | Supaporn T et al.       | 8914042             | Not a renal disease focus |
| 2  |                                                                                                                                                                                    |                         |                     |                           |
| 3  |                                                                                                                                                                                    |                         |                     |                           |
| 4  |                                                                                                                                                                                    |                         |                     |                           |
| 5  |                                                                                                                                                                                    |                         |                     |                           |
| 6  | 1                                                                                                                                                                                  |                         |                     |                           |
| 7  | Alpha1-antitrypsin phenotypes and anti-neutrophil cytoplasmic auto-antibodies in inflammatory bowel disease.                                                                       | Taddei C et al.         | 10563543            | Not a renal disease focus |
| 8  |                                                                                                                                                                                    |                         |                     |                           |
| 9  |                                                                                                                                                                                    |                         |                     |                           |
| 10 |                                                                                                                                                                                    |                         |                     |                           |
| 11 | 1                                                                                                                                                                                  |                         |                     |                           |
| 12 | Angiotensin I converting enzyme gene polymorphisms in systemic lupus erythematosus: decreased prevalence of DD genotype in African American patients                               | Tassiulas IO et al.     | 9710341             | Not a renal disease focus |
| 13 |                                                                                                                                                                                    |                         |                     |                           |
| 14 | 1                                                                                                                                                                                  |                         |                     |                           |
| 15 | Middle cerebral artery stenosis in type II diabetic Chinese patients is associated with conventional risk factors but not with polymorphisms of the renin-angiotensin system genes | Thomas GN et al.        | 12865608            | Not a renal disease focus |
| 16 |                                                                                                                                                                                    |                         |                     |                           |
| 17 | 1                                                                                                                                                                                  |                         |                     |                           |
| 18 | Peripheral vascular disease in type 2 diabetic Chinese patients: associations with metabolic indices, concomitant vascular disease and genetic factors                             | Thomas GN et al.        | 14632699            | Not a renal disease focus |
| 19 |                                                                                                                                                                                    |                         |                     |                           |
| 20 | 1                                                                                                                                                                                  |                         |                     |                           |
| 21 | Genetic predisposition to left ventricular hypertrophy and the potential involvement of cystatin-C in untreated hypertension.                                                      | Tousoulis D et al.      | 23479071            | Not a renal disease focus |
| 22 |                                                                                                                                                                                    |                         |                     |                           |
| 23 | 1                                                                                                                                                                                  |                         |                     |                           |
| 24 | Genomic association analysis identifies multiple loci influencing antihypertensive response to an angiotensin II receptor blocker.                                                 | Turner ST et al.        | 22566498            | Not a renal disease focus |
| 25 |                                                                                                                                                                                    |                         |                     |                           |
| 26 | 1                                                                                                                                                                                  |                         |                     |                           |
| 27 | The M235T polymorphism in the angiotensinogen gene is associated with the risk of malignant hypertension in white patients                                                         | van den Born BJH et al. | 17921816            | Not a renal disease focus |
| 28 |                                                                                                                                                                                    |                         |                     |                           |
| 29 | 1                                                                                                                                                                                  |                         |                     |                           |
| 30 | Genetic risk of atherosclerotic renal artery disease - The candidate gene approach in a renal angiography cohort                                                                   | van Onna M et al.       | 15326089            | Not a renal disease focus |
| 31 |                                                                                                                                                                                    |                         |                     |                           |
| 32 | 1                                                                                                                                                                                  |                         |                     |                           |
| 33 | Eprosartan modulates the reflex activation of the sympathetic nervous system in sodium restricted healthy humans                                                                   | Vase H et al.           | 18341678            | Not a renal disease focus |
| 34 |                                                                                                                                                                                    |                         |                     |                           |
| 35 | 1                                                                                                                                                                                  |                         |                     |                           |
| 36 | Angiotensin I-converting enzyme and angiotensinogen gene interaction and prediction of essential hypertension                                                                      | Vasku A et al.          | 9607178             | Not a renal disease focus |
| 37 |                                                                                                                                                                                    |                         |                     |                           |
| 38 | 1                                                                                                                                                                                  |                         |                     |                           |
| 39 | Association between ACE gene polymorphisms and Alzheimer's disease in Han population in Hebei Peninsula                                                                            | Wang XL et al.          | WOS:000412148800122 | Not a renal disease focus |
| 40 |                                                                                                                                                                                    |                         |                     |                           |
| 41 | 1                                                                                                                                                                                  |                         |                     |                           |
| 42 | Genotype-phenotype analysis of angiotensinogen polymorphisms and essential hypertension: the importance of haplotypes                                                              | Watkins WS et al.       | 19770777            | Not a renal disease focus |
| 43 |                                                                                                                                                                                    |                         |                     |                           |
| 44 |                                                                                                                                                                                    |                         |                     |                           |
| 45 |                                                                                                                                                                                    |                         |                     |                           |
| 46 |                                                                                                                                                                                    |                         |                     |                           |

|    |                                                                                                                                             |               |          |                           |
|----|---------------------------------------------------------------------------------------------------------------------------------------------|---------------|----------|---------------------------|
| 1  | No association between a genetic variant of the p22(phox) component of NAD(P)H oxidase and the incidence and progression of IgA nephropathy | Wolf G et al. | 12147803 | Not a renal disease focus |
| 2  |                                                                                                                                             |               |          |                           |
| 3  |                                                                                                                                             |               |          |                           |
| 4  |                                                                                                                                             |               |          |                           |
| 5  |                                                                                                                                             |               |          |                           |
| 6  |                                                                                                                                             |               |          |                           |
| 7  |                                                                                                                                             |               |          |                           |
| 8  |                                                                                                                                             |               |          |                           |
| 9  |                                                                                                                                             |               |          |                           |
| 10 |                                                                                                                                             |               |          |                           |
| 11 |                                                                                                                                             |               |          |                           |
| 12 |                                                                                                                                             |               |          |                           |
| 13 |                                                                                                                                             |               |          |                           |
| 14 |                                                                                                                                             |               |          |                           |
| 15 |                                                                                                                                             |               |          |                           |
| 16 |                                                                                                                                             |               |          |                           |
| 17 |                                                                                                                                             |               |          |                           |
| 18 |                                                                                                                                             |               |          |                           |
| 19 |                                                                                                                                             |               |          |                           |
| 20 |                                                                                                                                             |               |          |                           |
| 21 |                                                                                                                                             |               |          |                           |
| 22 |                                                                                                                                             |               |          |                           |
| 23 |                                                                                                                                             |               |          |                           |
| 24 |                                                                                                                                             |               |          |                           |
| 25 |                                                                                                                                             |               |          |                           |
| 26 |                                                                                                                                             |               |          |                           |
| 27 |                                                                                                                                             |               |          |                           |
| 28 |                                                                                                                                             |               |          |                           |
| 29 |                                                                                                                                             |               |          |                           |
| 30 |                                                                                                                                             |               |          |                           |
| 31 |                                                                                                                                             |               |          |                           |
| 32 |                                                                                                                                             |               |          |                           |
| 33 |                                                                                                                                             |               |          |                           |
| 34 |                                                                                                                                             |               |          |                           |
| 35 |                                                                                                                                             |               |          |                           |
| 36 |                                                                                                                                             |               |          |                           |
| 37 |                                                                                                                                             |               |          |                           |
| 38 |                                                                                                                                             |               |          |                           |
| 39 |                                                                                                                                             |               |          |                           |
| 40 |                                                                                                                                             |               |          |                           |
| 41 |                                                                                                                                             |               |          |                           |
| 42 |                                                                                                                                             |               |          |                           |
| 43 |                                                                                                                                             |               |          |                           |
| 44 |                                                                                                                                             |               |          |                           |
| 45 |                                                                                                                                             |               |          |                           |
| 46 |                                                                                                                                             |               |          |                           |

|    |                                                                                                                                                                                   |                        |          |                                   |
|----|-----------------------------------------------------------------------------------------------------------------------------------------------------------------------------------|------------------------|----------|-----------------------------------|
| 1  | [Effect of eprosartan on the hemostatic system in patients with chronic kidney disease associated with hereditary thrombophilia].                                                 | Kaliuzhin VV et al.    | 24261234 | Not written in English or Spanish |
| 2  |                                                                                                                                                                                   |                        |          |                                   |
| 3  |                                                                                                                                                                                   |                        |          |                                   |
| 4  |                                                                                                                                                                                   |                        |          |                                   |
| 5  |                                                                                                                                                                                   |                        |          |                                   |
| 6  | 1 [Polymorphism studies of angiotensin converting enzyme gene in chronic glomerulonephritis].                                                                                     | Kutyryna IM et al.     | 10420452 | Not written in English or Spanish |
| 7  |                                                                                                                                                                                   |                        |          |                                   |
| 8  |                                                                                                                                                                                   |                        |          |                                   |
| 9  | 1 [Relationship between serum angiotensin I-converting enzyme activity and diabetic nephropathy in patients with type II diabetes].                                               | Liao L et al.          | 12016801 | Not written in English or Spanish |
| 10 |                                                                                                                                                                                   |                        |          |                                   |
| 11 |                                                                                                                                                                                   |                        |          |                                   |
| 12 | 1 [Relationship between I/D polymorphism of angiotensin I converting enzyme gene and microvascular complications in type 2 diabetic patients].                                    | Moleda P et al.        | 17941464 | Not written in English or Spanish |
| 13 |                                                                                                                                                                                   |                        |          |                                   |
| 14 |                                                                                                                                                                                   |                        |          |                                   |
| 15 | 1 [Pharmacogenetic aspects of candesartan application for the treatment of arterial hypertension in patients with chronic pyelonephritis].                                        | Mormol' IA             | 25286611 | Not written in English or Spanish |
| 16 |                                                                                                                                                                                   |                        |          |                                   |
| 17 |                                                                                                                                                                                   |                        |          |                                   |
| 18 | 1 [A study on angiotensin-I converting enzyme polymorphism in CAPD patients].                                                                                                     | Nishina M              | 9014479  | Not written in English or Spanish |
| 19 |                                                                                                                                                                                   |                        |          |                                   |
| 20 |                                                                                                                                                                                   |                        |          |                                   |
| 21 | 1 [Identification of the locus associated with diabetic nephropathy in type 1 diabetes mellitus].                                                                                 | Savost'ianov KV et al. | 12500539 | Not written in English or Spanish |
| 22 |                                                                                                                                                                                   |                        |          |                                   |
| 23 | 1 [Relationships of angiotensinogen gene M235T variant with diabetic nephropathy in Chinese type 2 diabetes mellitus].                                                            | Wang J et al.          | 10514536 | Not written in English or Spanish |
| 24 |                                                                                                                                                                                   |                        |          |                                   |
| 25 |                                                                                                                                                                                   |                        |          |                                   |
| 26 | 1 [Association between angiotensin-II receptor gene type I polymorphism and diabetic nephropathy in type 2 diabetes mellitus].                                                    | Xue Y et al.           | 11798574 | Not written in English or Spanish |
| 27 |                                                                                                                                                                                   |                        |          |                                   |
| 28 |                                                                                                                                                                                   |                        |          |                                   |
| 29 | 1 [AGTR1 A1166C polymorphism is associated with risk of diabetic nephropathy].                                                                                                    | Yin X et al.           | 23505107 | Not written in English or Spanish |
| 30 |                                                                                                                                                                                   |                        |          |                                   |
| 31 |                                                                                                                                                                                   |                        |          |                                   |
| 32 | 1 Posterior urethral valves: Preliminary observations on the significance of plasma renin activity as a prognostic marker                                                         | Bajpai M et al.        | 15643266 | Paediatric Individuals            |
| 33 |                                                                                                                                                                                   |                        |          |                                   |
| 34 | 1 Donor and recipient ACE I/D genotype are associated with loss of renal function in children following renal transplantation                                                     | Buscher R et al.       | 21309964 | Paediatric Individuals            |
| 35 |                                                                                                                                                                                   |                        |          |                                   |
| 36 | 1 Polymorphisms of the angiotensin converting enzyme and angiotensin II type 1 receptor genes and renal scarring in non-uropathic children with recurrent urinary tract infection | Ece A et al.           | 16109085 | Paediatric Individuals            |
| 37 |                                                                                                                                                                                   |                        |          |                                   |
| 38 |                                                                                                                                                                                   |                        |          |                                   |
| 39 |                                                                                                                                                                                   |                        |          |                                   |
| 40 |                                                                                                                                                                                   |                        |          |                                   |
| 41 |                                                                                                                                                                                   |                        |          |                                   |
| 42 |                                                                                                                                                                                   |                        |          |                                   |
| 43 |                                                                                                                                                                                   |                        |          |                                   |
| 44 |                                                                                                                                                                                   |                        |          |                                   |
| 45 |                                                                                                                                                                                   |                        |          |                                   |
| 46 |                                                                                                                                                                                   |                        |          |                                   |

|   |                                                                                                                                                                            |                       |          |                        |
|---|----------------------------------------------------------------------------------------------------------------------------------------------------------------------------|-----------------------|----------|------------------------|
| 1 | Genetic polymorphism of ACE and the angiotensin II type1 receptor genes in children with chronic kidney disease                                                            | Elshamaa MF et al.    | 21859496 | Paediatric Individuals |
| 1 | ACE gene polymorphism in Egyptian children with idiopathic nephrotic syndrome                                                                                              | Fahmy ME et al.       | 18792483 | Paediatric Individuals |
| 1 | Identification of a novel splice site mutation of CLCN5 gene and characterization of a new alternative 5 ' UTR end of CIC-5 mRNA in human renal tissue and leukocytes      | Forino M et al.       | 14673707 | Paediatric Individuals |
| 1 | Genetic polymorphisms of the renin-angiotensin system and the outcome of focal segmental glomerulosclerosis in children                                                    | Frishberg Y et al.    | 9853248  | Paediatric Individuals |
| 1 | Angiotensinogen gene T235 variant: a marker for the development of persistent microalbuminuria in children and adolescents with type 1 diabetes mellitus                   | Gallego PH et al.     | 18413222 | Paediatric Individuals |
| 1 | Autosomal dominant pseudohypoaldosteronism type 1: Mechanisms, evidence for neonatal lethality, and phenotypic expression in adults                                        | Geller DS et al.      | 16611713 | Paediatric Individuals |
| 1 | Implication of genetic variations in congenital obstructive nephropathy                                                                                                    | Hahn H et al.         | 16133060 | Paediatric Individuals |
| 1 | Variants of alpha(1)-proteinase inhibitor in black and white South African patients with focal glomerulosclerosis and minimal change nephrotic syndrome                    | Halkas AC et al.      | 9475086  | Paediatric Individuals |
| 1 | Angiotensin-converting enzyme insertion/deletion gene polymorphism in Egyptian children with systemic lupus erythematosus: a possible relation to proliferative nephritis. | Hammad A et al.       | 27956582 | Paediatric Individuals |
| 1 | ACE gene polymorphism and renal scarring in primary vesicoureteric reflux                                                                                                  | Haszon I et al.       | 12478352 | Paediatric Individuals |
| 1 | Angiotensin type 2 receptor is important in the normal development of the ureter                                                                                           | Hohenfellner K et al. | 10353402 | Paediatric Individuals |
| 1 | Impact of common functional polymorphisms in renin angiotensin system genes on the risk of renal parenchymal scarring following childhood urinary tract infection          | Hussein A et al.      | 25939993 | Paediatric Individuals |

|    |                                                                                                    |                                                                                                                                                             |                       |                        |                        |
|----|----------------------------------------------------------------------------------------------------|-------------------------------------------------------------------------------------------------------------------------------------------------------------|-----------------------|------------------------|------------------------|
| 1  | Gene Polymorphisms of Adducin GLY460TRP, ACE I/D, and AGT M235T in Pediatric Hypertension Patients | Kaplan I et al.                                                                                                                                             | 25262176              | Paediatric Individuals |                        |
| 2  |                                                                                                    |                                                                                                                                                             |                       |                        |                        |
| 3  |                                                                                                    |                                                                                                                                                             |                       |                        |                        |
| 4  | 1                                                                                                  | ACE and AT1 receptor gene polymorphisms and renal scarring in urinary bladder dysfunction                                                                   | Kostic M et al.       | 15179569               | Paediatric Individuals |
| 5  |                                                                                                    |                                                                                                                                                             |                       |                        |                        |
| 6  | 1                                                                                                  | Renal tubular dysgenesis, a not uncommon autosomal recessive disorder leading to oligohydramnios: Role of the Renin-Angiotensin system.                     | Lacoste M et al.      | 16790508               | Paediatric Individuals |
| 7  |                                                                                                    |                                                                                                                                                             |                       |                        |                        |
| 8  | 1                                                                                                  | Hemorrhagic shock and encephalopathy: clinical, pathologic, and biochemical features.                                                                       | Levin M et al.        | 2783733                | Paediatric Individuals |
| 9  |                                                                                                    |                                                                                                                                                             |                       |                        |                        |
| 10 | 1                                                                                                  | Renin-angiotensin system gene polymorphisms in children with Henoch-Schonlein purpura in West China                                                         | Liu DS et al.         | WOS:000284763300006    | Paediatric Individuals |
| 11 |                                                                                                    |                                                                                                                                                             |                       |                        |                        |
| 12 | 1                                                                                                  | Renin-angiotensin system polymorphisms in Taiwanese primary vesicoureteral reflux                                                                           | Liu KP et al.         | 15045574               | Paediatric Individuals |
| 13 |                                                                                                    |                                                                                                                                                             |                       |                        |                        |
| 14 | 1                                                                                                  | Polymorphisms of renin-angiotensin system genes in childhood IgA nephropathy                                                                                | Maruyama K et al.     | 11354780               | Paediatric Individuals |
| 15 |                                                                                                    |                                                                                                                                                             |                       |                        |                        |
| 16 | 1                                                                                                  | Angiotensin-Converting Enzyme Gene Polymorphism in Children with Idiopathic Nephrotic Syndrome, Effect on Biopsy Findings.                                  | Monajemzadeh M et al. | 28481137               | Paediatric Individuals |
| 17 |                                                                                                    |                                                                                                                                                             |                       |                        |                        |
| 18 | 1                                                                                                  | A-20C angiotensinogen gene polymorphism and proteinuria in childhood IgA nephropathy                                                                        | Nakanishi K et al.    | 14648325               | Paediatric Individuals |
| 19 |                                                                                                    |                                                                                                                                                             |                       |                        |                        |
| 20 | 1                                                                                                  | Implications of certain genetic polymorphisms in scarring in vesicoureteric reflux: importance of ACE polymorphism.                                         | Ozen S et al.         | 10401028               | Paediatric Individuals |
| 21 |                                                                                                    |                                                                                                                                                             |                       |                        |                        |
| 22 | 1                                                                                                  | Renin-angiotensin system gene polymorphisms: association with susceptibility to Henoch-Schonlein purpura and renal involvement                              | Ozkaya O et al.       | 16521052               | Paediatric Individuals |
| 23 |                                                                                                    |                                                                                                                                                             |                       |                        |                        |
| 24 | 1                                                                                                  | Renin-angiotensin gene polymorphism in children with uremia and essential hypertension                                                                      | Papp F et al.         | 12579405               | Paediatric Individuals |
| 25 |                                                                                                    |                                                                                                                                                             |                       |                        |                        |
| 26 | 1                                                                                                  | Renin-angiotensin system polymorphisms and renal scarring                                                                                                   | Pardo R et al.        | 12579398               | Paediatric Individuals |
| 27 |                                                                                                    |                                                                                                                                                             |                       |                        |                        |
| 28 | 1                                                                                                  | Angiotensin I-converting enzyme-gene-polymorphism: Relationship to albumin excretion and blood pressure in pediatric patients with type-I-diabetes mellitus | Pavlovic M et al.     | 9354852                | Paediatric Individuals |
| 29 |                                                                                                    |                                                                                                                                                             |                       |                        |                        |
| 30 |                                                                                                    |                                                                                                                                                             |                       |                        |                        |
| 31 |                                                                                                    |                                                                                                                                                             |                       |                        |                        |
| 32 |                                                                                                    |                                                                                                                                                             |                       |                        |                        |
| 33 |                                                                                                    |                                                                                                                                                             |                       |                        |                        |
| 34 |                                                                                                    |                                                                                                                                                             |                       |                        |                        |
| 35 |                                                                                                    |                                                                                                                                                             |                       |                        |                        |
| 36 |                                                                                                    |                                                                                                                                                             |                       |                        |                        |
| 37 |                                                                                                    |                                                                                                                                                             |                       |                        |                        |
| 38 |                                                                                                    |                                                                                                                                                             |                       |                        |                        |
| 39 |                                                                                                    |                                                                                                                                                             |                       |                        |                        |
| 40 |                                                                                                    |                                                                                                                                                             |                       |                        |                        |
| 41 |                                                                                                    |                                                                                                                                                             |                       |                        |                        |
| 42 |                                                                                                    |                                                                                                                                                             |                       |                        |                        |
| 43 |                                                                                                    |                                                                                                                                                             |                       |                        |                        |
| 44 |                                                                                                    |                                                                                                                                                             |                       |                        |                        |
| 45 |                                                                                                    |                                                                                                                                                             |                       |                        |                        |
| 46 |                                                                                                    |                                                                                                                                                             |                       |                        |                        |



|    |                                                                                                                                              |                                                                                                                                                                  |                  |                        |                           |
|----|----------------------------------------------------------------------------------------------------------------------------------------------|------------------------------------------------------------------------------------------------------------------------------------------------------------------|------------------|------------------------|---------------------------|
| 1  | Angiotensin I converting enzyme and angiotensinogen gene polymorphisms related to 24-h blood pressure in paediatric type I diabetes mellitus | Pavlovic M et al.                                                                                                                                                | 9950302          | Paediatric Individuals |                           |
| 2  |                                                                                                                                              |                                                                                                                                                                  |                  |                        |                           |
| 3  |                                                                                                                                              |                                                                                                                                                                  |                  |                        |                           |
| 4  |                                                                                                                                              |                                                                                                                                                                  |                  |                        |                           |
| 5  |                                                                                                                                              |                                                                                                                                                                  |                  |                        |                           |
| 6  |                                                                                                                                              |                                                                                                                                                                  |                  |                        |                           |
| 7  |                                                                                                                                              |                                                                                                                                                                  |                  |                        |                           |
| 8  | 1                                                                                                                                            | Low renin-angiotensin system activity gene polymorphism and dysplasia associated with posterior urethral valves                                                  | Peruzzi L et al. | 16006956               | Paediatric Individuals    |
| 9  |                                                                                                                                              |                                                                                                                                                                  |                  |                        |                           |
| 10 |                                                                                                                                              |                                                                                                                                                                  |                  |                        |                           |
| 11 | 1                                                                                                                                            | Angiotensin-converting enzyme and angiotensin type 2 receptor gene genotype distributions in Italian children with congenital uropathies                         | Rigoli L et al.  | 15470205               | Paediatric Individuals    |
| 12 |                                                                                                                                              |                                                                                                                                                                  |                  |                        |                           |
| 13 |                                                                                                                                              |                                                                                                                                                                  |                  |                        |                           |
| 14 | 1                                                                                                                                            | Angiotensin II type 2 receptor gene polymorphism in Caucasian children with a wide spectrum of congenital anomalies of the kidney and urinary tract              | Siomou E et al.  | 17515833               | Paediatric Individuals    |
| 15 |                                                                                                                                              |                                                                                                                                                                  |                  |                        |                           |
| 16 |                                                                                                                                              |                                                                                                                                                                  |                  |                        |                           |
| 17 | 1                                                                                                                                            | Effects of genetic polymorphisms of the renin-angiotensin system in children with nephrotic syndrome                                                             | Tabel Y et al.   | 16525944               | Paediatric Individuals    |
| 18 |                                                                                                                                              |                                                                                                                                                                  |                  |                        |                           |
| 19 |                                                                                                                                              |                                                                                                                                                                  |                  |                        |                           |
| 20 | 1                                                                                                                                            | ACE gene polymorphism in childhood IgA nephropathy: Association with clinicopathologic findings                                                                  | Tanaka R et al.  | 9590186                | Paediatric Individuals    |
| 21 |                                                                                                                                              |                                                                                                                                                                  |                  |                        |                           |
| 22 | 1                                                                                                                                            | Genetic risk factors in typical haemolytic uraemic syndrome                                                                                                      | Taranta A et al. | 19110485               | Paediatric Individuals    |
| 23 |                                                                                                                                              |                                                                                                                                                                  |                  |                        |                           |
| 24 |                                                                                                                                              |                                                                                                                                                                  |                  |                        |                           |
| 25 | 1                                                                                                                                            | The juxtaglomerular apparatus in Bartter's syndrome and related tubulopathies. An immunocytochemical and electron microscopic study.                             | Taugner R et al. | 3128915                | Paediatric Individuals    |
| 26 |                                                                                                                                              |                                                                                                                                                                  |                  |                        |                           |
| 27 |                                                                                                                                              |                                                                                                                                                                  |                  |                        |                           |
| 28 | 1                                                                                                                                            | Genetic polymorphism of the renin-angiotensin system on the development of primary vesicoureteral reflux                                                         | Yim HE et al.    | 14764974               | Paediatric Individuals    |
| 29 |                                                                                                                                              |                                                                                                                                                                  |                  |                        |                           |
| 30 | 1                                                                                                                                            | Genetic control of VEGF and TGF-beta 1 gene polymorphisms in childhood urinary tract infection and vesicoureteral reflux                                         | Yim HE et al.    | 17597658               | Paediatric Individuals    |
| 31 |                                                                                                                                              |                                                                                                                                                                  |                  |                        |                           |
| 32 |                                                                                                                                              |                                                                                                                                                                  |                  |                        |                           |
| 33 | 1                                                                                                                                            | Estimation of the relationship between the polymorphisms of selected genes: ACE, AGTR1, TGF beta 1 and GNB3 with the occurrence of primary vesicoureteral reflux | Zyckowski et al. | 27988909               | Paediatric Individuals    |
| 34 |                                                                                                                                              |                                                                                                                                                                  |                  |                        |                           |
| 35 |                                                                                                                                              |                                                                                                                                                                  |                  |                        |                           |
| 36 | 1                                                                                                                                            | Randomized Controlled Trial: Lisinopril Reduces Proteinuria, Ammonia, and Renal Polypeptide Tubular Catabolism in Patients With Chronic Allograft Nephropathy    | Amara AB et al.  | 20061926               | Pharmaceutical drug focus |
| 37 |                                                                                                                                              |                                                                                                                                                                  |                  |                        |                           |
| 38 |                                                                                                                                              |                                                                                                                                                                  |                  |                        |                           |
| 39 |                                                                                                                                              |                                                                                                                                                                  |                  |                        |                           |
| 40 |                                                                                                                                              |                                                                                                                                                                  |                  |                        |                           |
| 41 |                                                                                                                                              |                                                                                                                                                                  |                  |                        |                           |
| 42 |                                                                                                                                              |                                                                                                                                                                  |                  |                        |                           |
| 43 |                                                                                                                                              |                                                                                                                                                                  |                  |                        |                           |
| 44 |                                                                                                                                              |                                                                                                                                                                  |                  |                        |                           |
| 45 |                                                                                                                                              |                                                                                                                                                                  |                  |                        |                           |
| 46 |                                                                                                                                              |                                                                                                                                                                  |                  |                        |                           |



|    |   |                                                                                                                                                                           |                         |          |                           |
|----|---|---------------------------------------------------------------------------------------------------------------------------------------------------------------------------|-------------------------|----------|---------------------------|
| 1  | 1 | Long-term renoprotective effects of losartan in diabetic nephropathy: interaction with ACE insertion/deletion genotype?                                                   | Andersen S et al.       | 12716812 | Pharmaceutical drug focus |
| 2  | 1 | Effects of losartan and enalapril on high-sensitivity C-reactive protein and total antioxidant in renal transplant recipients with renin-angiotensin system polymorphisms | Argani H et al.         | 18261537 | Pharmaceutical drug focus |
| 3  | 1 | Efficacy and safety of the angiotensin II receptor blocker losartan for hypertrophic cardiomyopathy: the INHERIT randomised, double-blind, placebo-controlled trial       | Axelsson A et al.       | 25533774 | Pharmaceutical drug focus |
| 4  | 1 | Angiotensin I - Converting enzyme gene polymorphism modulates the consequences of in utero growth retardation on plasma insulin in young adults                           | Cambien F et al.        | 9519756  | Pharmaceutical drug focus |
| 5  | 1 | Losartan decreases plasma levels of TGF-beta 1 in transplant patients with chronic allograft nephropathy                                                                  | Campistol JM et al.     | 10432413 | Pharmaceutical drug focus |
| 6  | 1 | High serum enalaprilat in chronic renal failure                                                                                                                           | Elung-Jensen et al.     | 11881130 | Pharmaceutical drug focus |
| 7  | 1 | The influence of renin-angiotensin system genotypes on the antiproteinuric response to high doses of olmesartan in non-diabetic protein uric nephropathies                | Goyache-Goni B et al.   | 24241364 | Pharmaceutical drug focus |
| 8  | 1 | Renal implications of angiotensin receptor blockers                                                                                                                       | Hollenberg NK           | 11459212 | Pharmaceutical drug focus |
| 9  | 1 | CYP2C9 genotype and pharmacodynamic responses to losartan in patients with primary and secondary kidney diseases.                                                         | Joy MS et al.           | 19669737 | Pharmaceutical drug focus |
| 10 | 1 | Association of angiotensinogen gene polymorphism with erythropoietin-induced hypertension: a preliminary report                                                           | Kuriyama S et al.       | 11675943 | Pharmaceutical drug focus |
| 11 | 1 | The influence of the ACE (I/D) polymorphism on systemic and renal vascular responses to angiotensins in normotensive, normoalbuminuric Type 1 diabetes mellitus           | Luik PT et al.          | 12856080 | Pharmaceutical drug focus |
| 12 | 1 | Renin-angiotensin system polymorphisms and hemoglobin level in renal allografts: A comparative study between losartan and enalapril                                       | Noroozianavval M et al. | 17524880 | Pharmaceutical drug focus |
| 13 | 1 | ACE gene polymorphism and losartan treatment in type 2 diabetic patients with nephropathy                                                                                 | Parving HH et al.       | 18199798 | Pharmaceutical drug focus |

|    |                                                                                                                                                                                                                            |                        |                     |                           |
|----|----------------------------------------------------------------------------------------------------------------------------------------------------------------------------------------------------------------------------|------------------------|---------------------|---------------------------|
| 1  | Enalapril and losartan affect lipid peroxidation in renal transplant recipients with renin-angiotensin system polymorphisms                                                                                                | Rashtchizadeh N et al. | 17222813            | Pharmaceutical drug focus |
| 2  | Exaggerated natriuresis during clamping of systemic NO supply in healthy young men                                                                                                                                         | Simonsen JA et al.     | 21749320            | Pharmaceutical drug focus |
| 3  | Influence of genetic polymorphisms of the renin-angiotensin system on IgA nephropathy                                                                                                                                      | Bantis C et al.        | 15031629            | No data                   |
| 4  | Genetic polymorphisms of renin-angiotensin system and progression of interstitial nephritis.                                                                                                                               | Buraczyńska M et al.   | 12898858            | No data                   |
| 5  | Polymorphism of the angiotensinogen gene and genetic predisposition to diabetic nephropathy in diabetes mellitus type 1                                                                                                    | Chistyakov DA et al.   | WOS:000079798700011 | No data                   |
| 6  | U.K. Prospective Diabetes Study. XV: Relationship of renin-angiotensin system gene polymorphisms with microalbuminuria in NIDDM.                                                                                           | Dudley CR et al.       | 8587251             | No data                   |
| 7  | Angiotensin I-converting enzyme and angiotensinogen gene polymorphisms in non-insulin-dependent diabetes mellitus. Lack of relationship with diabetic nephropathy and retinopathy in a Caucasian Mediterranean population. | Gutierrez C et al.     | 9258285             | No data                   |
| 8  | Effects of the genetic polymorphisms of the renin-angiotensin system on focal segmental glomerulosclerosis.                                                                                                                | Luther Y et al.        | 14610337            | No data                   |
| 9  | The renin--angiotensin system gene polymorphisms and clinicopathological correlations in IgA nephropathy.                                                                                                                  | Ong-Ajyooth S et al.   | 10511770            | No data                   |
| 10 | Combinational effect of genes for the renin-angiotensin system in conferring susceptibility to diabetic nephropathy.                                                                                                       | Osawa N et al.         | 17143591            | No data                   |
| 11 | The relationship between genetic and haemodynamic factors in diabetic nephropathy (DN): Case-control study in type 1 diabetes mellitus (T1DM)                                                                              | Shestakova MV et al.   | WOS:000242410600010 | No data                   |
| 12 | Relationship between angiotensinogen gene M235T variant with diabetic nephropathy in Chinese NIDDM                                                                                                                         | Wang JJ et al.         | 11717948            | No data                   |
| 13 | Lack of association of angiotensin-converting enzyme (D/D/II) and angiotensinogen M235T gene polymorphism with renal function among Chinese patients with type II diabetes                                                 | Wong TYH et al.        | 10352194            | No data                   |

|   |                                                                                                                                                                                  |                         |          |                                  |
|---|----------------------------------------------------------------------------------------------------------------------------------------------------------------------------------|-------------------------|----------|----------------------------------|
| 2 | Polymorphism of renin-angiotensin system genes in IgA nephropathy                                                                                                                | Woo KT et al.           | 15504143 | No data                          |
| 3 | ACE variants interact with the RAS pathway to confer risk and protection against type 2 diabetic nephropathy.                                                                    | Ahluwalia TS et al.     | 19108684 | < 3 populations reported per SNP |
| 3 | Analysis of polymorphism in renin angiotensin system and other related genes in South Indian chronic kidney disease patients.                                                    | Anbazhagan K et al.     | 19520069 | < 3 populations reported per SNP |
| 3 | Polymorphism of the renin-angiotensin-aldosterone system in patients with chronic allograft dysfunction                                                                          | Ayed K et al.           | 16635753 | < 3 populations reported per SNP |
| 3 | Renin-angiotensin-aldosterone system related gene polymorphisms and urinary total arsenic is related to chronic kidney disease                                                   | Chen WJ et al.          | 24907556 | < 3 populations reported per SNP |
| 3 | Hypertension after renal transplantation and polymorphism of genes involved in essential hypertension: ACE, AGT, AT1R and ecNOS                                                  | El-Essawy AB et al.     | 11926202 | < 3 populations reported per SNP |
| 3 | Genetic polymorphisms of the renin-angiotensin-aldosterone system and renal insufficiency in essential hypertension.                                                             | Fabris B et al.         | 15662219 | < 3 populations reported per SNP |
| 3 | Angiotensinogen gene polymorphisms and progression of chronic kidney disease in ADPKD patients                                                                                   | Gnanasambandan R et al. | 26482465 | < 3 populations reported per SNP |
| 3 | Angiotensinogen and angiotensin II type 1 receptor gene polymorphism in patients with autosomal dominant polycystic kidney disease: effect on hypertension and ESRD.             | Lee KB et al.           | 12950120 | < 3 populations reported per SNP |
| 3 | Genes involved in the regulation of vascular homeostasis determine renal survival rate in patients with chronic glomerulonephritis                                               | Litovkina O et al.      | 24727057 | < 3 populations reported per SNP |
| 3 | Contribution of genetic polymorphism in the renin-angiotensin system to the development of renal complications in insulin-dependent diabetes                                     | Marre M et al.          | 9120002  | < 3 populations reported per SNP |
| 3 | Genetic polymorphism of renin-angiotensin system is not associated with diabetic vascular complications in Japanese subjects with long-term insulin dependent diabetes mellitus. | Miura J et al.          | 10499884 | < 3 populations reported per SNP |
| 3 | Renin-angiotensin-aldosterone system genotypes and haplotypes affect the susceptibility to nephropathy in type 2 diabetes patients                                               | Mtiraoui N et al.       | 21421655 | < 3 populations reported per SNP |

|   |                                                                                                                                                       |                     |          |                                  |
|---|-------------------------------------------------------------------------------------------------------------------------------------------------------|---------------------|----------|----------------------------------|
| 3 | Renin-angiotensin system gene polymorphisms predict the progression to renal insufficiency among Asians with lupus nephritis                          | Parsa A et al.      | 15789057 | < 3 populations reported per SNP |
| 3 | Association of aldosterone synthase (CYP11B2) gene -344T/C polymorphism with the risk of primary chronic glomerulonephritis in the Polish population. | Pawlik M et al.     | 23681285 | < 3 populations reported per SNP |
| 3 | Association of angiotensinogen gene T235 variant with progression of immunoglobulin A nephropathy in Caucasian patients                               | Pei Y et al.        | 9259580  | < 3 populations reported per SNP |
| 3 | Chronic renal insufficiency among Asian Indians with type 2 diabetes: I. Role of RAAS gene polymorphisms.                                             | Prasad P et al.     | 16672053 | < 3 populations reported per SNP |
| 3 | Angiotensinogen and plasminogen activator inhibitor-1 gene polymorphism in relation to renovascular disease.                                          | Reis KA et al.      | 16228848 | < 3 populations reported per SNP |
| 3 | M235T Polymorphism in the AGT Gene and A/G18-83 Substitution in the REN Gene Correlate with End-Stage Renal Disease                                   | Sarkar S et al.     | 25660845 | < 3 populations reported per SNP |
| 3 | Genetic variants of ACE (Insertion/Deletion) and AGT (M268T) genes in patients with diabetes and nephropathy                                          | Shaikh R et al.     | 24737640 | < 3 populations reported per SNP |
| 3 | Polymorphisms of the renin-angiotensin system genes in Brazilian patients with lupus nephropathy.                                                     | Sprovieri SR et al. | 15934435 | < 3 populations reported per SNP |
| 3 | Interaction between gene polymorphisms of nitric oxide synthase and renin-angiotensin system in the progression of membranous glomerulonephritis      | Stratta P et al.    | 14767013 | < 3 populations reported per SNP |
| 3 | Gene polymorphisms of angiotensin-converting enzyme and angiotensin II type 1 receptor among chronic kidney disease patients in a Chinese population. | Su SL et al.        | 22147663 | < 3 populations reported per SNP |
| 3 | Genetic polymorphisms and the risk of progressive renal failure in elderly Hungarian patients.                                                        | Zsom M et al.       | 22111818 | < 3 populations reported per SNP |

**Supplementary Table S3d:** Excluded studies from the *AGTR1* search

\*Exclusion stage relates to the stage at which the article was removed as shown in the flow diagram (Supplementary Figure S1d)

| Exclusion Stage | Title                                                                                                                                                                                                         | Authors                   | Pubmed ID or WoS ID if Pubmed ID not available | Reason                      |
|-----------------|---------------------------------------------------------------------------------------------------------------------------------------------------------------------------------------------------------------|---------------------------|------------------------------------------------|-----------------------------|
| 1               | Identification of potential candidate genes for hypertensive nephropathy based on gene expression profile                                                                                                     | Chen Z et al.             | 27756246                                       | Gene expression based study |
| 1               | Polymorphism in IgA nephropathy                                                                                                                                                                               | Liu ZH et al.             | WOS:A1997WW80600013                            | No data for AGTR1           |
| 1               | The effect of angiotensin receptor blockade ARB on the regression of left ventricular hypertrophy in hemodialysis patients: comparison between patients with D allele and non-D allele ACE gene polymorphism. | Nakayama M et al.         | 16312263                                       | No data for AGTR1           |
| 1               | Angiotensin II receptor type 1 A1166C modifies the association between angiotensinogen M235T and chronic kidney disease                                                                                       | Su SL et al.              | 29296205                                       | No data for AGTR1           |
| 1               | Specific pregnancy-induced angiotensin II type-1 receptor expression in ovine uterine artery does not involve formation of alternate splice variants or alternate promoter usage                              | Bird IM et al.            | 9687288                                        | Non-human study             |
| 1               | CCN1 expression in interleukin-6 deficient mouse kidney in experimental model of heart failure                                                                                                                | Bonda TA et al.           | 23690222                                       | Non-human study             |
| 1               | The genetic deletion of Mas abolishes salt induced hypertension in mice                                                                                                                                       | Heringer-Walther S et al. | 22652430                                       | Non-human study             |
| 1               | The angiotensin type II receptor tonically inhibits angiotensin-converting enzyme in AT2 null mutant mice                                                                                                     | Hunley TE et al.          | 10652034                                       | Non-human study             |
| 1               | Collecting Duct Nitric Oxide Synthase 1 beta Activation Maintains Sodium Homeostasis During High Sodium Intake Through Suppression of Aldosterone and Renal Angiotensin II Pathways                           | Hyndman KA et al.         | 29066445                                       | Non-human study             |
| 1               | Physiological impact of increased expression of the AT(1) angiotensin receptor                                                                                                                                | Le TH et al.              | 12963678                                       | Non-human study             |

|    |   |                                                                                                                                                                   |                             |          |                          |
|----|---|-------------------------------------------------------------------------------------------------------------------------------------------------------------------|-----------------------------|----------|--------------------------|
| 1  | 1 | Angiotensin receptor-binding protein ATRAP/Agtrap inhibits metabolic dysfunction with visceral obesity.                                                           | Maeda A et al.              | 23902639 | Non-human study          |
| 2  | 1 | A novel rodent model of pregnancy complications associated with genetically determined angiotensin-converting enzyme (ACE) activity                               | Mata-Greenwood E et al.     | 29360395 | Non-human study          |
| 3  | 1 | Losartan and Sodium Nitroprusside Effectively Protect against Renal Impairments after Ischemia and Reperfusion in Rats                                            | Srisawat U et al.           | 25947921 | Non-human study          |
| 4  | 1 | Blood Pressure Control by a Secreted FGFBP1 (Fibroblast Growth Factor-Binding Protein).                                                                           | Tassi E et al.              | 29158353 | Non-human study          |
| 5  | 1 | Mechanisms of Renal. Control of Potassium Homeostasis in Complete Aldosterone Deficiency                                                                          | Todkar A et al.             | 25071088 | Non-human study          |
| 6  | 1 | Cardiac phenotype and angiotensin II levels in AT(1a), AT(1b), and AT(2) receptor single, double, and triple knockouts                                            | van Esch JHM et al.         | 20071356 | Non-human study          |
| 7  | 1 | Human GRK4 gamma(142V) Variant Promotes Angiotensin II Type I Receptor-Mediated Hypertension via Renal Histone Deacetylase Type 1 Inhibition                      | Wang Z et al.               | 26667412 | Non-human study          |
| 8  | 1 | Add-on angiotensin receptor blockade with maximized ACE inhibition                                                                                                | Agarwal R                   | 11380832 | Not a case-control study |
| 9  | 1 | Association of the genetic polymorphisms of the renin-angiotensin system and endothelial nitric oxide synthase with chronic renal transplant dysfunction.         | Akcay A et al.              | 15385810 | Not a case-control study |
| 10 | 1 | Influence of genetic polymorphisms of the renin-angiotensin system on IgA nephropathy                                                                             | Bantis C et al.             | 15031629 | Not a case-control study |
| 11 | 1 | Genetic determinants of acute renal damage risk and prognosis: a systematic review                                                                                | Cardinal-Fernandez P et al. | 22436318 | Not a case-control study |
| 12 | 1 | Association between two genetic polymorphisms of the renin-angiotensin-aldosterone system and diabetic nephropathy: a meta-analysis                               | Ding W et al.               | 21607620 | Not a case-control study |
| 13 | 1 | A systematic review and meta-analysis of the association between angiotensin II type 1 receptor A1166C gene polymorphism and myocardial infarction susceptibility | Feng X et al.               | 23178513 | Not a case-control study |

|    |                                                                                                                                                                                      |                 |          |                          |
|----|--------------------------------------------------------------------------------------------------------------------------------------------------------------------------------------|-----------------|----------|--------------------------|
| 1  | Polymorphism of angiotensin converting enzyme, angiotensinogen, and angiotensin II type 1 receptor genes and end-stage renal failure in IgA nephropathy: IGARAS - A study of 274 men | Frimat L et al. | 11053482 | Not a case-control study |
| 2  |                                                                                                                                                                                      |                 |          |                          |
| 3  |                                                                                                                                                                                      |                 |          |                          |
| 4  |                                                                                                                                                                                      |                 |          |                          |
| 5  |                                                                                                                                                                                      |                 |          |                          |
| 6  |                                                                                                                                                                                      |                 |          |                          |
| 7  |                                                                                                                                                                                      |                 |          |                          |
| 8  |                                                                                                                                                                                      |                 |          |                          |
| 9  |                                                                                                                                                                                      |                 |          |                          |
| 10 |                                                                                                                                                                                      |                 |          |                          |
| 11 |                                                                                                                                                                                      |                 |          |                          |
| 12 |                                                                                                                                                                                      |                 |          |                          |
| 13 |                                                                                                                                                                                      |                 |          |                          |
| 14 |                                                                                                                                                                                      |                 |          |                          |
| 15 |                                                                                                                                                                                      |                 |          |                          |
| 16 |                                                                                                                                                                                      |                 |          |                          |
| 17 |                                                                                                                                                                                      |                 |          |                          |
| 18 |                                                                                                                                                                                      |                 |          |                          |
| 19 |                                                                                                                                                                                      |                 |          |                          |
| 20 |                                                                                                                                                                                      |                 |          |                          |
| 21 |                                                                                                                                                                                      |                 |          |                          |
| 22 |                                                                                                                                                                                      |                 |          |                          |
| 23 |                                                                                                                                                                                      |                 |          |                          |
| 24 |                                                                                                                                                                                      |                 |          |                          |
| 25 |                                                                                                                                                                                      |                 |          |                          |
| 26 |                                                                                                                                                                                      |                 |          |                          |
| 27 |                                                                                                                                                                                      |                 |          |                          |
| 28 |                                                                                                                                                                                      |                 |          |                          |
| 29 |                                                                                                                                                                                      |                 |          |                          |
| 30 |                                                                                                                                                                                      |                 |          |                          |
| 31 |                                                                                                                                                                                      |                 |          |                          |
| 32 |                                                                                                                                                                                      |                 |          |                          |
| 33 |                                                                                                                                                                                      |                 |          |                          |
| 34 |                                                                                                                                                                                      |                 |          |                          |
| 35 |                                                                                                                                                                                      |                 |          |                          |
| 36 |                                                                                                                                                                                      |                 |          |                          |
| 37 |                                                                                                                                                                                      |                 |          |                          |
| 38 |                                                                                                                                                                                      |                 |          |                          |
| 39 |                                                                                                                                                                                      |                 |          |                          |
| 40 |                                                                                                                                                                                      |                 |          |                          |
| 41 |                                                                                                                                                                                      |                 |          |                          |
| 42 |                                                                                                                                                                                      |                 |          |                          |
| 43 |                                                                                                                                                                                      |                 |          |                          |
| 44 |                                                                                                                                                                                      |                 |          |                          |
| 45 |                                                                                                                                                                                      |                 |          |                          |
| 46 |                                                                                                                                                                                      |                 |          |                          |



|    |                                                                                                                                                                                |                                                                                                                                                                       |                      |                           |                           |
|----|--------------------------------------------------------------------------------------------------------------------------------------------------------------------------------|-----------------------------------------------------------------------------------------------------------------------------------------------------------------------|----------------------|---------------------------|---------------------------|
| 1  | Association of renin-angiotensin and endothelial nitric oxide synthase gene polymorphisms with blood pressure progression and incident hypertension: prospective cohort study. | Conen D et al.                                                                                                                                                        | 18698212             | Not a renal disease focus |                           |
| 2  |                                                                                                                                                                                |                                                                                                                                                                       |                      |                           |                           |
| 3  |                                                                                                                                                                                |                                                                                                                                                                       |                      |                           |                           |
| 4  |                                                                                                                                                                                |                                                                                                                                                                       |                      |                           |                           |
| 5  |                                                                                                                                                                                |                                                                                                                                                                       |                      |                           |                           |
| 6  | 1                                                                                                                                                                              | Functional polymorphisms in genes of the Angiotensin and Serotonin systems and risk of hypertrophic cardiomyopathy: AT1R as a potential modifier.                     | Coto E et al.        | 20594303                  | Not a renal disease focus |
| 7  |                                                                                                                                                                                |                                                                                                                                                                       |                      |                           |                           |
| 8  |                                                                                                                                                                                |                                                                                                                                                                       |                      |                           |                           |
| 9  | 1                                                                                                                                                                              | Polymorphisms in genes of the renin-angiotensin-aldosterone system and renal cell cancer risk: Interplay with hypertension and intakes of sodium, potassium and fluid | Deckers IA et al.    | 24978482                  | Not a renal disease focus |
| 10 |                                                                                                                                                                                |                                                                                                                                                                       |                      |                           |                           |
| 11 |                                                                                                                                                                                |                                                                                                                                                                       |                      |                           |                           |
| 12 | 1                                                                                                                                                                              | Single nucleotide polymorphism of adiponectin +276 G/T is associated with the susceptibility to essential hypertension in a Turkish population.                       | Demir AK et al.      | 27936341                  | Not a renal disease focus |
| 13 |                                                                                                                                                                                |                                                                                                                                                                       |                      |                           |                           |
| 14 |                                                                                                                                                                                |                                                                                                                                                                       |                      |                           |                           |
| 15 | 1                                                                                                                                                                              | Genetic variation of the renin-angiotensin system and chronic kidney disease progression in black individuals in the atherosclerosis risk in communities study        | Hsu CCC et al.       | 16396964                  | Not a renal disease focus |
| 16 |                                                                                                                                                                                |                                                                                                                                                                       |                      |                           |                           |
| 17 |                                                                                                                                                                                |                                                                                                                                                                       |                      |                           |                           |
| 18 | 1                                                                                                                                                                              | Genetic variant of the renin-angiotensin system and prevalence of type 2 diabetes mellitus: a modest but significant effect of aldosterone synthase                   | Ichikawa M et al.    | 24549414                  | Not a renal disease focus |
| 19 |                                                                                                                                                                                |                                                                                                                                                                       |                      |                           |                           |
| 20 |                                                                                                                                                                                |                                                                                                                                                                       |                      |                           |                           |
| 21 | 1                                                                                                                                                                              | Renin-Angiotensin System Gene Variants and Type 2 Diabetes Mellitus: Influence of Angiotensinogen                                                                     | Joyce-Tan SM et al.  | 26682227                  | Not a renal disease focus |
| 22 |                                                                                                                                                                                |                                                                                                                                                                       |                      |                           |                           |
| 23 |                                                                                                                                                                                |                                                                                                                                                                       |                      |                           |                           |
| 24 | 1                                                                                                                                                                              | Comprehensive analysis of the renin-angiotensin gene polymorphisms with relation to hypertension in the Japanese                                                      | Kato N et al.        | 10953993                  | Not a renal disease focus |
| 25 |                                                                                                                                                                                |                                                                                                                                                                       |                      |                           |                           |
| 26 |                                                                                                                                                                                |                                                                                                                                                                       |                      |                           |                           |
| 27 | 1                                                                                                                                                                              | Renin-angiotensin system gene polymorphisms: its impact on IgAN and its progression to end-stage renal failure among Chinese in Singapore.                            | Lau YK et al.        | 15153745                  | Not a renal disease focus |
| 28 |                                                                                                                                                                                |                                                                                                                                                                       |                      |                           |                           |
| 29 |                                                                                                                                                                                |                                                                                                                                                                       |                      |                           |                           |
| 30 | 1                                                                                                                                                                              | Angiotensin II type 1 receptor gene polymorphism and the response to hyperglycemia in early type 1 diabetes                                                           | Miller JA et al.     | 10969844                  | Not a renal disease focus |
| 31 |                                                                                                                                                                                |                                                                                                                                                                       |                      |                           |                           |
| 32 | 1                                                                                                                                                                              | Deep-targeted exon sequencing reveals renal polymorphisms associate with postexercise hypotension among African Americans                                             | Pescatello LS et al. | 27940662                  | Not a renal disease focus |
| 33 |                                                                                                                                                                                |                                                                                                                                                                       |                      |                           |                           |
| 34 |                                                                                                                                                                                |                                                                                                                                                                       |                      |                           |                           |
| 35 | 1                                                                                                                                                                              | Association between renin-angiotensin-aldosterone system-related genes and blood pressure in a Korean population.                                                     | Song SB et al.       | 21342026                  | Not a renal disease focus |
| 36 |                                                                                                                                                                                |                                                                                                                                                                       |                      |                           |                           |
| 37 | 1                                                                                                                                                                              | Angiotensin II Type 1A Receptors in Vascular Smooth Muscle Cells Do Not Influence Aortic Remodeling in Hypertension                                                   | Sparks MA et al.     | 21242463                  | Not a renal disease focus |
| 38 |                                                                                                                                                                                |                                                                                                                                                                       |                      |                           |                           |
| 39 |                                                                                                                                                                                |                                                                                                                                                                       |                      |                           |                           |
| 40 |                                                                                                                                                                                |                                                                                                                                                                       |                      |                           |                           |
| 41 |                                                                                                                                                                                |                                                                                                                                                                       |                      |                           |                           |
| 42 |                                                                                                                                                                                |                                                                                                                                                                       |                      |                           |                           |
| 43 |                                                                                                                                                                                |                                                                                                                                                                       |                      |                           |                           |
| 44 |                                                                                                                                                                                |                                                                                                                                                                       |                      |                           |                           |
| 45 |                                                                                                                                                                                |                                                                                                                                                                       |                      |                           |                           |
| 46 |                                                                                                                                                                                |                                                                                                                                                                       |                      |                           |                           |



|    |                                                                                                                                                        |                  |          |                           |
|----|--------------------------------------------------------------------------------------------------------------------------------------------------------|------------------|----------|---------------------------|
| 1  | Peripheral vascular disease in type 2 diabetic Chinese patients: associations with metabolic indices, concomitant vascular disease and genetic factors | Thomas GN et al. | 14632699 | Not a renal disease focus |
| 2  |                                                                                                                                                        |                  |          |                           |
| 3  |                                                                                                                                                        |                  |          |                           |
| 4  |                                                                                                                                                        |                  |          |                           |
| 5  |                                                                                                                                                        |                  |          |                           |
| 6  |                                                                                                                                                        |                  |          |                           |
| 7  |                                                                                                                                                        |                  |          |                           |
| 8  |                                                                                                                                                        |                  |          |                           |
| 9  |                                                                                                                                                        |                  |          |                           |
| 10 |                                                                                                                                                        |                  |          |                           |
| 11 |                                                                                                                                                        |                  |          |                           |
| 12 |                                                                                                                                                        |                  |          |                           |
| 13 |                                                                                                                                                        |                  |          |                           |
| 14 |                                                                                                                                                        |                  |          |                           |
| 15 |                                                                                                                                                        |                  |          |                           |
| 16 |                                                                                                                                                        |                  |          |                           |
| 17 |                                                                                                                                                        |                  |          |                           |
| 18 |                                                                                                                                                        |                  |          |                           |
| 19 |                                                                                                                                                        |                  |          |                           |
| 20 |                                                                                                                                                        |                  |          |                           |
| 21 |                                                                                                                                                        |                  |          |                           |
| 22 |                                                                                                                                                        |                  |          |                           |
| 23 |                                                                                                                                                        |                  |          |                           |
| 24 |                                                                                                                                                        |                  |          |                           |
| 25 |                                                                                                                                                        |                  |          |                           |
| 26 |                                                                                                                                                        |                  |          |                           |
| 27 |                                                                                                                                                        |                  |          |                           |
| 28 |                                                                                                                                                        |                  |          |                           |
| 29 |                                                                                                                                                        |                  |          |                           |
| 30 |                                                                                                                                                        |                  |          |                           |
| 31 |                                                                                                                                                        |                  |          |                           |
| 32 |                                                                                                                                                        |                  |          |                           |
| 33 |                                                                                                                                                        |                  |          |                           |
| 34 |                                                                                                                                                        |                  |          |                           |
| 35 |                                                                                                                                                        |                  |          |                           |
| 36 |                                                                                                                                                        |                  |          |                           |
| 37 |                                                                                                                                                        |                  |          |                           |
| 38 |                                                                                                                                                        |                  |          |                           |
| 39 |                                                                                                                                                        |                  |          |                           |
| 40 |                                                                                                                                                        |                  |          |                           |
| 41 |                                                                                                                                                        |                  |          |                           |
| 42 |                                                                                                                                                        |                  |          |                           |
| 43 |                                                                                                                                                        |                  |          |                           |
| 44 |                                                                                                                                                        |                  |          |                           |
| 45 |                                                                                                                                                        |                  |          |                           |
| 46 |                                                                                                                                                        |                  |          |                           |

|   |                                                                                                                                                                                 |                        |          |                                   |
|---|---------------------------------------------------------------------------------------------------------------------------------------------------------------------------------|------------------------|----------|-----------------------------------|
| 1 | [Pharmacogenetic aspects of candesartan application for the treatment of arterial hypertension in patients with chronic pyelonephritis].                                        | Mormol' IA             | 25286611 | Not written in English or Spanish |
| 1 | [Identification of the locus associated with diabetic nephropathy in type 1 diabetes mellitus].                                                                                 | Savost'ianov KV et al. | 12500539 | Not written in English or Spanish |
| 1 | [AGTR1 A1166C polymorphism is associated with risk of diabetic nephropathy].                                                                                                    | Yin X et al.           | 23505107 | Not written in English or Spanish |
| 1 | Donor and recipient ACE I/D genotype are associated with loss of renal function in children following renal transplantation                                                     | Buscher R et al.       | 21309964 | Paediatric Individuals            |
| 1 | Polymorphisms of the angiotensin converting enzyme and angiotensin II type 1 receptor genes and renal scarring in non-uropathic children with recurrent urinary tract infection | Ece A et al.           | 16109085 | Paediatric Individuals            |
| 1 | Cyclosporine A responsive congenital nephrotic syndrome with single heterozygous variants in NPHS1, NPHS2, and PLCE1                                                            | Eichinger A et al.     | 29663071 | Paediatric Individuals            |
| 1 | Genetic polymorphism of ACE and the angiotensin II type1 receptor genes in children with chronic kidney disease                                                                 | Eishamaa MF et al.     | 21859496 | Paediatric Individuals            |
| 1 | Genetic polymorphisms of the renin-angiotensin system and the outcome of focal segmental glomerulosclerosis in children                                                         | Frishberg Y et al.     | 9853248  | Paediatric Individuals            |
| 1 | Angiotensinogen gene T235 variant: a marker for the development of persistent microalbuminuria in children and adolescents with type 1 diabetes mellitus                        | Gallego PH et al.      | 18413222 | Paediatric Individuals            |
| 1 | ACE gene polymorphism and renal scarring in primary vesicoureteric reflux                                                                                                       | Haszon I et al.        | 12478352 | Paediatric Individuals            |
| 1 | Angiotensin type 2 receptor is important in the normal development of the ureter                                                                                                | Hohenfellner K et al.  | 10353402 | Paediatric Individuals            |
| 1 | Impact of common functional polymorphisms in renin angiotensin system genes on the risk of renal parenchymal scarring following childhood urinary tract infection               | Hussein A et al.       | 25939993 | Paediatric Individuals            |
| 1 | ACE and AT1 receptor gene polymorphisms and renal scarring in urinary bladder dysfunction                                                                                       | Kostic M et al.        | 15179569 | Paediatric Individuals            |

|    |   |                                                                                                                                                                                                        |                      |          |                           |
|----|---|--------------------------------------------------------------------------------------------------------------------------------------------------------------------------------------------------------|----------------------|----------|---------------------------|
| 1  | 1 | Renin-angiotensin system polymorphisms in Taiwanese primary vesicoureteral reflux                                                                                                                      | Liu KP et al.        | 15045574 | Paediatric Individuals    |
| 2  | 1 | Polymorphisms of renin-angiotensin system genes in childhood IgA nephropathy                                                                                                                           | Maruyama K et al.    | 11354780 | Paediatric Individuals    |
| 3  | 1 | Implications of certain genetic polymorphisms in scarring in vesicoureteric reflux: importance of ACE polymorphism.                                                                                    | Ozen S et al.        | 10401028 | Paediatric Individuals    |
| 4  | 1 | Renin-angiotensin system gene polymorphisms: association with susceptibility to Henoch-Schonlein purpura and renal involvement                                                                         | Ozkaya O et al.      | 16521052 | Paediatric Individuals    |
| 5  | 1 | Renin-angiotensin gene polymorphism in children with uremia and essential hypertension                                                                                                                 | Papp F et al.        | 12579405 | Paediatric Individuals    |
| 6  | 1 | Renin-angiotensin system polymorphisms and renal scarring                                                                                                                                              | Pardo R et al.       | 12579398 | Paediatric Individuals    |
| 7  | 1 | Effects of genetic polymorphisms of the renin-angiotensin system in children with nephrotic syndrome.                                                                                                  | Tabel Y et al.       | 16525944 | Paediatric Individuals    |
| 8  | 1 | Genetic risk factors in typical haemolytic uraemic syndrome                                                                                                                                            | Taranta A et al.     | 19110485 | Paediatric Individuals    |
| 9  | 1 | Mapping candidate regions and genes for congenital anomalies of the kidneys and urinary tract (CAKUT) by array-based comparative genomic hybridization                                                 | Weber S et al.       | 20605837 | Paediatric Individuals    |
| 10 | 1 | Genetic polymorphism of the renin-angiotensin system on the development of primary vesicoureteral reflux                                                                                               | Yim HE et al.        | 14764974 | Paediatric Individuals    |
| 11 | 1 | Estimation of the relationship between the polymorphisms of selected genes: ACE, AGTR1, TGF $\beta$ 1 and GNB3 with the occurrence of primary vesicoureteral reflux.                                   | Zyczkowski M et al.  | 27988909 | Paediatric Individuals    |
| 12 | 1 | Long-term renoprotective effects of losartan in diabetic nephropathy: interaction with ACE insertion/deletion genotype?                                                                                | Andersen S et al.    | 12716812 | Pharmaceutical drug focus |
| 13 | 1 | Effect of ACE and AT-2 inhibitors on mortality and progression to microalbuminuria in a nested case-control study of diabetic nephropathy in diabetes mellitus type 2: results from the GENDIAN study. | Boger CA et al.      | 16961167 | Pharmaceutical drug focus |
| 14 | 1 | Genetic polymorphisms of renin-angiotensin system and progression of interstitial nephritis.                                                                                                           | Buraczynska M et al. | 12898858 | Pharmaceutical drug focus |

|    |                                                                                                                                                                                                 |                        |          |                           |
|----|-------------------------------------------------------------------------------------------------------------------------------------------------------------------------------------------------|------------------------|----------|---------------------------|
| 1  | The influence of renin-angiotensin system genotypes on the antiproteinuric response to high doses of olmesartan in non-diabetic protein uric nephropathies                                      | Goyache-Goni B et al.  | 24241364 | Pharmaceutical drug focus |
| 2  | CYP2C9 genotype and pharmacodynamic responses to losartan in patients with primary and secondary kidney diseases.                                                                               | Joy MS et al.          | 19669737 | Pharmaceutical drug focus |
| 3  | Genotypic interactions of renin-angiotensin system genes with diabetes type 2 in a Tunisian population                                                                                          | Mehri S et al.         | 20580725 | Pharmaceutical drug focus |
| 4  | Evaluation of Candidate Nephropathy Susceptibility Genes in a Genome-Wide Association Study of African American Diabetic Kidney Disease                                                         | Palmer ND et al.       | 24551085 | Pharmaceutical drug focus |
| 5  | Chronic renal insufficiency among Asian Indians with type 2 diabetes: I. Role of RAAS gene polymorphisms.                                                                                       | Prasad P et al.        | 16672053 | Pharmaceutical drug focus |
| 6  | Enalapril and losartan affect lipid peroxidation in renal transplant recipients with renin-angiotensin system polymorphisms                                                                     | Rashtchizadeh N et al. | 17222813 | Pharmaceutical drug focus |
| 7  | A polymorphism in the angiotensin II type 1 receptor gene has different effects on the risk of diabetic nephropathy in men and women                                                            | Möllsten A et al.      | 21316998 | Incorrect patient group   |
| 8  | Effects of the genetic polymorphisms of the renin-angiotensin system on focal segmental glomerulosclerosis                                                                                      | Luther Y et al.        | 14610337 | No data                   |
| 9  | The renin--angiotensin system gene polymorphisms and clinicopathological correlations in IgA nephropathy.                                                                                       | Ong-Ajyooth S et al.   | 10511770 | No data                   |
| 10 | Combinational effect of genes for the renin-angiotensin system in conferring susceptibility to diabetic nephropathy.                                                                            | Osawa N et al.         | 17143591 | No data                   |
| 11 | Lack of synergism between long-term poor glycaemic control and three gene polymorphisms of the renin angiotensin system on risk of developing diabetic nephropathy in type I diabetic patients. | Tarnow L et al.        | 10907125 | No data                   |
| 12 | Gene polymorphisms of angiotensin-converting enzyme and angiotensin II Type 1 receptor among chronic kidney disease patients in a Chinese population                                            | Su SL et al.           | 22147663 | Overlap in patient group  |
| 13 | Polymorphism of renin-angiotensin system genes in IgA nephropathy                                                                                                                               | Woo KT et al.          | 15504143 | Overlap in patient group  |
| 14 | Association of a polymorphism of the apolipoprotein E gene with chronic kidney disease in Japanese individuals with metabolic syndrome                                                          | Yoshida T et al.       | 19056482 | Overlap in patient group  |

|   |                                                                                                                                                                     |                      |                                |                                  |
|---|---------------------------------------------------------------------------------------------------------------------------------------------------------------------|----------------------|--------------------------------|----------------------------------|
| 3 | Polymorphism of the renin–angiotensin–aldosterone system in patients with chronic allograft dysfunction                                                             | Ayed K et al.        | 16635753                       | < 3 populations reported per SNP |
| 3 | Angiotensin II type 1 receptor gene polymorphism in end-stage renal disease                                                                                         | Buraczynska M et al. | 12187084                       | < 3 populations reported per SNP |
| 3 | Genetic polymorphisms of the renin-angiotensin system in end-stage renal disease.                                                                                   | Buraczynska M et al. | 16384824                       | < 3 populations reported per SNP |
| 3 | Renin-angiotensin-aldosterone system related gene polymorphisms and urinary total arsenic is related to chronic kidney disease.                                     | Chen WJ et al.       | 24907556                       | < 3 populations reported per SNP |
| 3 | Hypertension after renal transplantation and polymorphism of genes involved in essential hypertension: ACE, AGT, AT1R and ecNOS                                     | El-Essawy AB et al.  | WOS:000174306600003 (11926202) | < 3 populations reported per SNP |
| 3 | Genetic polymorphisms of the renin-angiotensin-aldosterone system and renal insufficiency in essential hypertension                                                 | Fabris B et al.      | 15662219                       | < 3 populations reported per SNP |
| 3 | Relationship between polymorphisms in the renin-angiotensin system and nephropathy in type 2 diabetic patients.                                                     | Fradin S et al.      | 11938025                       | < 3 populations reported per SNP |
| 3 | Susceptibility and progression of end stage renal disease are not associated with angiotensin II type 1 receptor gene polymorphism                                  | Hanna MO et al.      | 25316403                       | < 3 populations reported per SNP |
| 3 | Renin-angiotensin system component gene polymorphisms in Japanese maintenance haemodialysis patients                                                                | Kawada N et al.      | WOS:000071880400005            | < 3 populations reported per SNP |
| 3 | GENETIC CLUES TO THE ETIOLOGY OF BALKAN ENDEMIC NEPHROPATHY: INVESTIGATING THE ROLE OF ACE AND AT1R POLYMORPHISMS                                                   | Krcunovic Z et al.   | WOS:000287217500011            | < 3 populations reported per SNP |
| 3 | Angiotensinogen and angiotensin II type 1 receptor gene polymorphism in patients with autosomal dominant polycystic kidney disease: Effect on hypertension and ESRD | Lee KB et al.        | 12950120                       | < 3 populations reported per SNP |

|   |                                                                                                                                                   |                     |                                |                                  |
|---|---------------------------------------------------------------------------------------------------------------------------------------------------|---------------------|--------------------------------|----------------------------------|
| 3 | Genes involved in the regulation of vascular homeostasis determine renal survival rate in patients with chronic glomerulonephritis                | Litovkina O et al.  | 24727057                       | < 3 populations reported per SNP |
| 3 | Polymorphism of renin-angiotensin system genes in dialysis patients - association with cerebrovascular disease                                    | Losito A et al.     | WOS:000179668600025 (12454231) | < 3 populations reported per SNP |
| 3 | Contribution of genetic polymorphism in the renin-angiotensin system to the development of renal complications in insulin-dependent diabetes      | Marre M et al.      | 9120002                        | < 3 populations reported per SNP |
| 3 | Association of angiotensinogen gene T235 variant with progression of immunoglobulin A nephropathy in Caucasian patients.                          | Pei Y et al.        | 9259580                        | < 3 populations reported per SNP |
| 3 | Polymorphisms of the renin-angiotensin system genes in Brazilian patients with lupus nephropathy.                                                 | Sprovieri SR et al. | 15934435                       | < 3 populations reported per SNP |
| 3 | Interaction between gene polymorphisms of nitric oxide synthase and renin-angiotensin system in the progression of membranous glomerulonephritis. | Stratta P et al.    | 14767013                       | < 3 populations reported per SNP |
| 3 | Gene-Gene Interactions in Renin-Angiotensin-Aldosterone System Contributes to End-Stage Renal Disease Susceptibility in a Han Chinese Population  | Su SL et al.        | 24977181                       | < 3 populations reported per SNP |
| 3 | Association of Genetic Variants with Chronic Kidney Disease in Japanese Individuals                                                               | Yoshida T et al.    | 19406964                       | < 3 populations reported per SNP |
| 3 | Genetic polymorphisms and the risk of progressive renal failure in elderly Hungarian patients.                                                    | Zsom M et al.       | 22111818                       | < 3 populations reported per SNP |

**Supplementary Table S3e:** Excluded studies from the *AGTR2* search

\*Exclusion stage relates to the stage at which the article was removed as shown in the flow diagram (Supplementary Figure S1e)

| Exclusion Stage | Title                                                                                                                                                                                           | Authors                 | Pubmed ID | Reason                   |
|-----------------|-------------------------------------------------------------------------------------------------------------------------------------------------------------------------------------------------|-------------------------|-----------|--------------------------|
| 1               | Association of angiotensinogen gene T235 variant with progression of immunoglobulin A nephropathy in Caucasian patients.                                                                        | Pei Y et al.            | 9259580   | No data for AGTR2        |
| 1               | Synergistic effect of angiotensin II type 1 receptor genotype and poor glycaemic control on risk of nephropathy in IDDM.                                                                        | Doria A et al.          | 9389421   | No data for AGTR2        |
| 1               | Lack of synergism between long-term poor glycaemic control and three gene polymorphisms of the renin angiotensin system on risk of developing diabetic nephropathy in type I diabetic patients. | Tarnow L et al.         | 10907125  | No data for AGTR2        |
| 1               | Angiotensin II type 1 receptor gene polymorphism and the response to hyperglycemia in early type 1 diabetes.                                                                                    | Miller JA et al.        | 10969844  | No data for AGTR2        |
| 1               | Polymorphism of angiotensin converting enzyme, angiotensinogen, and angiotensin II type 1 receptor genes and end-stage renal failure in IgA nephropathy: IGARAS--a study of 274 Men.            | Frimat L et al.         | 11053482  | No data for AGTR2        |
| 1               | Altered regulation of renal interstitial hydrostatic pressure and the renal renin-angiotensin system in the absence of atrial natriuretic peptide                                               | O'Tierney PF et al.     | 18192845  | No data for AGTR2        |
| 1               | The angiotensin type II receptor tonically inhibits angiotensin-converting enzyme in AT2 null mutant mice                                                                                       | Hunley TE et al.        | 10652034  | Non-human study          |
| 1               | A novel rodent model of pregnancy complications associated with genetically determined angiotensin-converting enzyme (ACE) activity                                                             | Mata-Greenwood E et al. | 29360395  | Non-human study          |
| 1               | Renin-angiotensin system polymorphisms and renal scarring                                                                                                                                       | Pardo R et al.          | 12579398  | Not a case-control study |

|    |                                                                                                                                                           |                                                                                                                                                  |                       |                          |                                   |
|----|-----------------------------------------------------------------------------------------------------------------------------------------------------------|--------------------------------------------------------------------------------------------------------------------------------------------------|-----------------------|--------------------------|-----------------------------------|
| 1  | Association of the genetic polymorphisms of the renin-angiotensin system and endothelial nitric oxide synthase with chronic renal transplant dysfunction. | Akçay A et al.                                                                                                                                   | 15385810              | Not a case-control study |                                   |
| 2  |                                                                                                                                                           |                                                                                                                                                  |                       |                          |                                   |
| 3  |                                                                                                                                                           |                                                                                                                                                  |                       |                          |                                   |
| 4  |                                                                                                                                                           |                                                                                                                                                  |                       |                          |                                   |
| 5  |                                                                                                                                                           |                                                                                                                                                  |                       |                          |                                   |
| 6  | 1                                                                                                                                                         | Whole-genome linkage and association scan in primary, nonsyndromic vesicoureteric reflux.                                                        | Cordell HJ et al.     | 19959718                 | Not a case-control study          |
| 7  |                                                                                                                                                           |                                                                                                                                                  |                       |                          |                                   |
| 8  |                                                                                                                                                           |                                                                                                                                                  |                       |                          |                                   |
| 9  |                                                                                                                                                           |                                                                                                                                                  |                       |                          |                                   |
| 10 |                                                                                                                                                           |                                                                                                                                                  |                       |                          |                                   |
| 11 | 1                                                                                                                                                         | Association of angiotensin converting enzyme and angiotensin type 2 receptor gene polymorphisms with renal damage in posterior urethral valves.  | Lakshmi NK et al.     | 20149750                 | Not a case-control study          |
| 12 |                                                                                                                                                           |                                                                                                                                                  |                       |                          |                                   |
| 13 |                                                                                                                                                           |                                                                                                                                                  |                       |                          |                                   |
| 14 | 1                                                                                                                                                         | Angiotensin type 2 receptor is important in the normal development of the ureter                                                                 | Hohenfellner K et al. | 10353402                 | Not a renal disease focus         |
| 15 |                                                                                                                                                           |                                                                                                                                                  |                       |                          |                                   |
| 16 | 1                                                                                                                                                         | Angiotensin II type 2 receptor gene is not responsible for familial vesicoureteral reflux                                                        | Yoneda A et al.       | 12187255                 | Not a renal disease focus         |
| 17 |                                                                                                                                                           |                                                                                                                                                  |                       |                          |                                   |
| 18 | 1                                                                                                                                                         | Genetic polymorphism of the renin-angiotensin system on the development of primary vesicoureteral reflux                                         | Yim HE et al.         | 14764974                 | Not a renal disease focus         |
| 19 |                                                                                                                                                           |                                                                                                                                                  |                       |                          |                                   |
| 20 |                                                                                                                                                           |                                                                                                                                                  |                       |                          |                                   |
| 21 | 1                                                                                                                                                         | Polymorphism in angiotensin II receptor genes and hypertension                                                                                   | Baudin B et al.       | 15640279                 | Not a renal disease focus         |
| 22 |                                                                                                                                                           |                                                                                                                                                  |                       |                          |                                   |
| 23 | 1                                                                                                                                                         | No evidence for angiotensin type 2 receptor gene polymorphism in intron 1 in patients with coarctation of the aorta and Ullrich-Turner syndrome. | Struwe E et al.       | 16944335                 | Not a renal disease focus         |
| 24 |                                                                                                                                                           |                                                                                                                                                  |                       |                          |                                   |
| 25 |                                                                                                                                                           |                                                                                                                                                  |                       |                          |                                   |
| 26 | 1                                                                                                                                                         | [Effect of eprosartan on the hemostatic system in patients with chronic kidney disease associated with hereditary thrombophilia].                | Kaliuzhin VV et al.   | 24261234                 | Not written in English or Spanish |
| 27 |                                                                                                                                                           |                                                                                                                                                  |                       |                          |                                   |
| 28 |                                                                                                                                                           |                                                                                                                                                  |                       |                          |                                   |
| 29 | 1                                                                                                                                                         | No evidence for AT2R gene derangement in human urinary tract anomalies.                                                                          | Hiraoka M et al.      | 11260384                 | Paediatric Individuals            |
| 30 |                                                                                                                                                           |                                                                                                                                                  |                       |                          |                                   |
| 31 | 1                                                                                                                                                         | Polymorphisms of renin-angiotensin system genes in childhood IgA nephropathy.                                                                    | Maruyama K et al.     | 11354780                 | Paediatric Individuals            |
| 32 |                                                                                                                                                           |                                                                                                                                                  |                       |                          |                                   |
| 33 |                                                                                                                                                           |                                                                                                                                                  |                       |                          |                                   |
| 34 | 1                                                                                                                                                         | Angiotensin-converting enzyme and angiotensin type 2 receptor gene genotype distributions in Italian children with congenital uropathies.        | Rigoli L et al.       | 15470205                 | Paediatric Individuals            |
| 35 |                                                                                                                                                           |                                                                                                                                                  |                       |                          |                                   |
| 36 |                                                                                                                                                           |                                                                                                                                                  |                       |                          |                                   |
| 37 | 1                                                                                                                                                         | Implication of genetic variations in congenital obstructive nephropathy.                                                                         | Hahn H et al.         | 16133060                 | Paediatric Individuals            |
| 38 |                                                                                                                                                           |                                                                                                                                                  |                       |                          |                                   |
| 39 |                                                                                                                                                           |                                                                                                                                                  |                       |                          |                                   |
| 40 |                                                                                                                                                           |                                                                                                                                                  |                       |                          |                                   |
| 41 |                                                                                                                                                           |                                                                                                                                                  |                       |                          |                                   |
| 42 |                                                                                                                                                           |                                                                                                                                                  |                       |                          |                                   |
| 43 |                                                                                                                                                           |                                                                                                                                                  |                       |                          |                                   |
| 44 |                                                                                                                                                           |                                                                                                                                                  |                       |                          |                                   |
| 45 |                                                                                                                                                           |                                                                                                                                                  |                       |                          |                                   |
| 46 |                                                                                                                                                           |                                                                                                                                                  |                       |                          |                                   |



|    |                                                                                                                                                     |                 |          |                        |
|----|-----------------------------------------------------------------------------------------------------------------------------------------------------|-----------------|----------|------------------------|
| 1  | Angiotensin II type 2 receptor gene polymorphism in Caucasian children with a wide spectrum of congenital anomalies of the kidney and urinary tract | Siomou E et al. | 17515833 | Paediatric Individuals |
| 2  |                                                                                                                                                     |                 |          |                        |
| 3  |                                                                                                                                                     |                 |          |                        |
| 4  |                                                                                                                                                     |                 |          |                        |
| 5  |                                                                                                                                                     |                 |          |                        |
| 6  |                                                                                                                                                     |                 |          |                        |
| 7  |                                                                                                                                                     |                 |          |                        |
| 8  |                                                                                                                                                     |                 |          |                        |
| 9  |                                                                                                                                                     |                 |          |                        |
| 10 |                                                                                                                                                     |                 |          |                        |
| 11 |                                                                                                                                                     |                 |          |                        |
| 12 |                                                                                                                                                     |                 |          |                        |
| 13 |                                                                                                                                                     |                 |          |                        |
| 14 |                                                                                                                                                     |                 |          |                        |
| 15 |                                                                                                                                                     |                 |          |                        |
| 16 |                                                                                                                                                     |                 |          |                        |
| 17 |                                                                                                                                                     |                 |          |                        |
| 18 |                                                                                                                                                     |                 |          |                        |
| 19 |                                                                                                                                                     |                 |          |                        |
| 20 |                                                                                                                                                     |                 |          |                        |
| 21 |                                                                                                                                                     |                 |          |                        |
| 22 |                                                                                                                                                     |                 |          |                        |
| 23 |                                                                                                                                                     |                 |          |                        |
| 24 |                                                                                                                                                     |                 |          |                        |
| 25 |                                                                                                                                                     |                 |          |                        |
| 26 |                                                                                                                                                     |                 |          |                        |
| 27 |                                                                                                                                                     |                 |          |                        |
| 28 |                                                                                                                                                     |                 |          |                        |
| 29 |                                                                                                                                                     |                 |          |                        |
| 30 |                                                                                                                                                     |                 |          |                        |
| 31 |                                                                                                                                                     |                 |          |                        |
| 32 |                                                                                                                                                     |                 |          |                        |
| 33 |                                                                                                                                                     |                 |          |                        |
| 34 |                                                                                                                                                     |                 |          |                        |
| 35 |                                                                                                                                                     |                 |          |                        |
| 36 |                                                                                                                                                     |                 |          |                        |
| 37 |                                                                                                                                                     |                 |          |                        |
| 38 |                                                                                                                                                     |                 |          |                        |
| 39 |                                                                                                                                                     |                 |          |                        |
| 40 |                                                                                                                                                     |                 |          |                        |
| 41 |                                                                                                                                                     |                 |          |                        |
| 42 |                                                                                                                                                     |                 |          |                        |
| 43 |                                                                                                                                                     |                 |          |                        |
| 44 |                                                                                                                                                     |                 |          |                        |
| 45 |                                                                                                                                                     |                 |          |                        |
| 46 |                                                                                                                                                     |                 |          |                        |

**Supplementary Table S3f:** Excluded studies from the *REN* search

\*Exclusion stage relates to the stage at which the article was removed as shown in the flow diagram (Supplementary Figure S1f)

| Exclusion Stage | Title                                                                                                                                                         | Authors             | Pubmed ID or WoS ID if Pubmed ID not available | Reason                      |
|-----------------|---------------------------------------------------------------------------------------------------------------------------------------------------------------|---------------------|------------------------------------------------|-----------------------------|
| 1               | Increased amount of the angiotensin-converting enzyme (ACE) mRNA originating from the ACE allele with deletion.                                               | Suehiro T et al.    | 15164285                                       | Gene expression based study |
| 1               | Increased expression of monocytic angiotensin-converting enzyme in dialysis patients with cardiovascular disease                                              | Ulrich C et al.     | 16476718                                       | Gene expression based study |
| 1               | Synergistic expression of angiotensin-converting enzyme (ACE) and ACE2 in human renal tissue and confounding effects of hypertension on the ACE to ACE2 ratio | Wakahara S et al.   | 17303661                                       | Gene expression based study |
| 1               | Insertion / Deletion Polymorphism of Angiotensin Converting Enzyme Gene Does Not Contribute to Chronic Kidney Disease in Palestine                            | Abuaisha AM et al.  | WOS:000433049000003                            | No data for REN             |
| 1               | Relationship between GSTs gene polymorphism and susceptibility to end stage renal disease among North Indians.                                                | Agrawal S et al.    | 18067039                                       | No data for REN             |
| 1               | ACE variants interact with the RAS pathway to confer risk and protection against type 2 diabetic nephropathy.                                                 | Ahluwalia TS et al. | 19108684                                       | No data for REN             |
| 1               | Analysis of insertion/deletion polymorphisms of the angiotensin converting enzyme gene in Malaysian end-stage renal disease patients.                         | Ali A et al.        | 21421653                                       | No data for REN             |
| 1               | Apparent Mineralocorticoid Excess Caused By A Novel Mutation In 11-Beta Hydroxysteroid Dehydrogenase Type 2 Enzyme: Its Genetics And Response To Therapy      | Alzahrani AS et al. | 24936560                                       | No data for REN             |
| 1               | Clinical impact of an angiotensin I-converting enzyme insertion/deletion and kinin B2 receptor +9/-9 polymorphisms in the prognosis of renal transplantation  | Amorim CEN et al.   | 23362199                                       | No data for REN             |

|    |                                                                                                                              |                     |          |                 |
|----|------------------------------------------------------------------------------------------------------------------------------|---------------------|----------|-----------------|
| 1  | Analysis of polymorphism in Renin Angiotensin System and other related genes in South Indian chronic kidney disease patients | Anbazhagan K et al. | 19520069 | No data for REN |
| 2  |                                                                                                                              |                     |          |                 |
| 3  |                                                                                                                              |                     |          |                 |
| 4  |                                                                                                                              |                     |          |                 |
| 5  |                                                                                                                              |                     |          |                 |
| 6  |                                                                                                                              |                     |          |                 |
| 7  |                                                                                                                              |                     |          |                 |
| 8  |                                                                                                                              |                     |          |                 |
| 9  |                                                                                                                              |                     |          |                 |
| 10 |                                                                                                                              |                     |          |                 |
| 11 |                                                                                                                              |                     |          |                 |
| 12 |                                                                                                                              |                     |          |                 |
| 13 |                                                                                                                              |                     |          |                 |
| 14 |                                                                                                                              |                     |          |                 |
| 15 |                                                                                                                              |                     |          |                 |
| 16 |                                                                                                                              |                     |          |                 |
| 17 |                                                                                                                              |                     |          |                 |
| 18 |                                                                                                                              |                     |          |                 |
| 19 |                                                                                                                              |                     |          |                 |
| 20 |                                                                                                                              |                     |          |                 |
| 21 |                                                                                                                              |                     |          |                 |
| 22 |                                                                                                                              |                     |          |                 |
| 23 |                                                                                                                              |                     |          |                 |
| 24 |                                                                                                                              |                     |          |                 |
| 25 |                                                                                                                              |                     |          |                 |
| 26 |                                                                                                                              |                     |          |                 |
| 27 |                                                                                                                              |                     |          |                 |
| 28 |                                                                                                                              |                     |          |                 |
| 29 |                                                                                                                              |                     |          |                 |
| 30 |                                                                                                                              |                     |          |                 |
| 31 |                                                                                                                              |                     |          |                 |
| 32 |                                                                                                                              |                     |          |                 |
| 33 |                                                                                                                              |                     |          |                 |
| 34 |                                                                                                                              |                     |          |                 |
| 35 |                                                                                                                              |                     |          |                 |
| 36 |                                                                                                                              |                     |          |                 |
| 37 |                                                                                                                              |                     |          |                 |
| 38 |                                                                                                                              |                     |          |                 |
| 39 |                                                                                                                              |                     |          |                 |
| 40 |                                                                                                                              |                     |          |                 |
| 41 |                                                                                                                              |                     |          |                 |
| 42 |                                                                                                                              |                     |          |                 |
| 43 |                                                                                                                              |                     |          |                 |
| 44 |                                                                                                                              |                     |          |                 |
| 45 |                                                                                                                              |                     |          |                 |
| 46 |                                                                                                                              |                     |          |                 |

|   |                                                                                                                                                        |                      |          |                 |
|---|--------------------------------------------------------------------------------------------------------------------------------------------------------|----------------------|----------|-----------------|
| 1 | Genetic polymorphisms of the renin-angiotensin system in end-stage renal disease                                                                       | Buraczynska M et al. | 16384824 | No data for REN |
| 1 | Angiotensin II type 1 receptor gene polymorphism in end-stage renal disease                                                                            | Buraczynska M et al. | 12187084 | No data for REN |
| 1 | Familial renal glucosuria: SLC5A2 mutation analysis and evidence of salt-wasting                                                                       | Calado J et al.      | 16518345 | No data for REN |
| 1 | Non-relation of parathyroid hormone gene polymorphisms to secondary hyperparathyroidism in Chinese hemodialysis patients.                              | Chen JB et al.       | 15083922 | No data for REN |
| 1 | Effect of IL-6 C-572G polymorphism on idiopathic membranous nephropathy risk in a Han Chinese population.                                              | Chen SY et al.       | 20954977 | No data for REN |
| 1 | Lack of association between transient receptor potential cation channel 6 polymorphisms and primary membranous glomerulonephritis.                     | Chen WC et al.       | 20540633 | No data for REN |
| 1 | Renin-angiotensin-aldosterone system related gene polymorphisms and urinary total arsenic is related to chronic kidney disease                         | Chen WJ et al.       | 24907556 | No data for REN |
| 1 | Toll-like receptor 9 SNPs are susceptible to the development and progression of membranous glomerulonephritis: 27 years follow-up in Taiwan.           | Chen YT et al.       | 23964786 | No data for REN |
| 1 | Endothelial nitric oxide synthase gene polymorphisms and the renal hemodynamic response to L-arginine                                                  | Cherney DZI et al.   | 19037250 | No data for REN |
| 1 | Influence of uridine diphosphate-glucuronosyltransferases (1A9) polymorphisms on mycophenolic acid pharmacokinetics in patients with renal transplant. | Ciftci HS et al.     | 30012031 | No data for REN |
| 1 | Serological and genetic factors in early recurrence of IgA nephropathy after renal transplantation                                                     | Coppo R et al.       | 17988266 | No data for REN |
| 1 | Association of glutathione S-transferase M1 and T1 gene polymorphism with oxidative stress in diabetic and nondiabetic chronic kidney disease.         | Datta SK et al.      | 20954980 | No data for REN |
| 1 | ACE, PAI-1, decorin and Warner helicase genes are not associated with the development of renal disease in European patients with Type 1 diabetes       | De Cosmo S et al.    | 10495473 | No data for REN |
| 1 | U.K. Prospective Diabetes Study. XV: Relationship of renin-angiotensin system gene polymorphisms with microalbuminuria in NIDDM.                       | Dudley CR et al.     | 8587251  | No data for REN |

|    |                                                                                                   |                                                                                                                                                                                      |                         |                 |                 |
|----|---------------------------------------------------------------------------------------------------|--------------------------------------------------------------------------------------------------------------------------------------------------------------------------------------|-------------------------|-----------------|-----------------|
| 1  | Angiotensin II type 1 receptor (A1166C) gene polymorphism in Egyptian adult hemodialysis patients | El-Banawy H et al.                                                                                                                                                                   | WOS:000365886400009     | No data for REN |                 |
| 2  |                                                                                                   |                                                                                                                                                                                      |                         |                 |                 |
| 3  |                                                                                                   |                                                                                                                                                                                      |                         |                 |                 |
| 4  | 1                                                                                                 | Mthfr C677T, A1298C And Ace I/D Polymorphisms As Risk Factors For Diabetic Nephropathy Among Type 2 Diabetic Patients.                                                               | El-Baz R et al.         | 22554825        | No data for REN |
| 5  |                                                                                                   |                                                                                                                                                                                      |                         |                 |                 |
| 6  | 1                                                                                                 | Impact of nitric oxide synthase Glu298Asp polymorphism on the development of end-stage renal disease in type 2 diabetic Egyptian patients.                                           | El-Din Bessa SS et al.  | 21854353        | No data for REN |
| 7  |                                                                                                   |                                                                                                                                                                                      |                         |                 |                 |
| 8  | 1                                                                                                 | Angiotensin-I converting enzyme gene polymorphism in Turkish type 2 diabetic patients                                                                                                | Ergen HA et al.         | 15365253        | No data for REN |
| 9  |                                                                                                   |                                                                                                                                                                                      |                         |                 |                 |
| 10 | 1                                                                                                 | GAS6 intron 8 c.834 + 7G > A gene polymorphism in diabetic nephropathy.                                                                                                              | Erkoc R et al.          | 25869052        | No data for REN |
| 11 |                                                                                                   |                                                                                                                                                                                      |                         |                 |                 |
| 12 | 1                                                                                                 | DNA polymorphisms in the ACE gene, serum ACE activity and the risk of nephropathy in insulin-dependent diabetes mellitus                                                             | Freire MBS et al.       | 9794558         | No data for REN |
| 13 |                                                                                                   |                                                                                                                                                                                      |                         |                 |                 |
| 14 | 1                                                                                                 | Polymorphism of angiotensin converting enzyme, angiotensinogen, and angiotensin II type 1 receptor genes and end-stage renal failure in IgA nephropathy: IGARAS - A study of 274 men | Frimat L et al.         | 11053482        | No data for REN |
| 15 |                                                                                                   |                                                                                                                                                                                      |                         |                 |                 |
| 16 | 1                                                                                                 | Polymorphisms in the gene encoding angiotensin I converting enzyme 2 and diabetic nephropathy                                                                                        | Frojdo S et al.         | 16211375        | No data for REN |
| 17 |                                                                                                   |                                                                                                                                                                                      |                         |                 |                 |
| 18 | 1                                                                                                 | Lack of association between the heparan sulfate proteoglycan gene polymorphism and diabetic nephropathy in Japanese NIDDM with proliferative diabetic retinopathy.                   | Fujita H et al.         | 10586428        | No data for REN |
| 19 |                                                                                                   |                                                                                                                                                                                      |                         |                 |                 |
| 20 | 1                                                                                                 | Effects of erythropoietin, angiotensin II, and angiotensin-converting enzyme inhibitor on erythroid precursors in patients with posttransplantation erythrocytosis                   | Glicklich D et al.      | 10428268        | No data for REN |
| 21 |                                                                                                   |                                                                                                                                                                                      |                         |                 |                 |
| 22 | 1                                                                                                 | Angiotensinogen gene polymorphisms and progression of chronic kidney disease in ADPKD patients                                                                                       | Gnanasambandan R et al. | 26482465        | No data for REN |
| 23 |                                                                                                   |                                                                                                                                                                                      |                         |                 |                 |
| 24 | 1                                                                                                 | Association study of ACE polymorphisms and systemic lupus erythematosus in Northern Chinese Han population                                                                           | Gong AM et al.          | 22729880        | No data for REN |
| 25 |                                                                                                   |                                                                                                                                                                                      |                         |                 |                 |
| 26 |                                                                                                   |                                                                                                                                                                                      |                         |                 |                 |
| 27 |                                                                                                   |                                                                                                                                                                                      |                         |                 |                 |
| 28 |                                                                                                   |                                                                                                                                                                                      |                         |                 |                 |
| 29 |                                                                                                   |                                                                                                                                                                                      |                         |                 |                 |
| 30 |                                                                                                   |                                                                                                                                                                                      |                         |                 |                 |
| 31 |                                                                                                   |                                                                                                                                                                                      |                         |                 |                 |
| 32 |                                                                                                   |                                                                                                                                                                                      |                         |                 |                 |
| 33 |                                                                                                   |                                                                                                                                                                                      |                         |                 |                 |
| 34 |                                                                                                   |                                                                                                                                                                                      |                         |                 |                 |
| 35 |                                                                                                   |                                                                                                                                                                                      |                         |                 |                 |
| 36 |                                                                                                   |                                                                                                                                                                                      |                         |                 |                 |
| 37 |                                                                                                   |                                                                                                                                                                                      |                         |                 |                 |
| 38 |                                                                                                   |                                                                                                                                                                                      |                         |                 |                 |
| 39 |                                                                                                   |                                                                                                                                                                                      |                         |                 |                 |
| 40 |                                                                                                   |                                                                                                                                                                                      |                         |                 |                 |
| 41 |                                                                                                   |                                                                                                                                                                                      |                         |                 |                 |
| 42 |                                                                                                   |                                                                                                                                                                                      |                         |                 |                 |
| 43 |                                                                                                   |                                                                                                                                                                                      |                         |                 |                 |
| 44 |                                                                                                   |                                                                                                                                                                                      |                         |                 |                 |
| 45 |                                                                                                   |                                                                                                                                                                                      |                         |                 |                 |
| 46 |                                                                                                   |                                                                                                                                                                                      |                         |                 |                 |

|    |                                                                                                                                                                                                                           |                                                                                                                                                                |                           |                     |                 |
|----|---------------------------------------------------------------------------------------------------------------------------------------------------------------------------------------------------------------------------|----------------------------------------------------------------------------------------------------------------------------------------------------------------|---------------------------|---------------------|-----------------|
| 1  | Angiotensin I converting enzyme and angiotensinogen gene polymorphisms in non-insulin-dependent diabetes mellitus. Lack of relationship with diabetic nephropathy and retinopathy in a Caucasian Mediterranean population | Gutierrez C et al.                                                                                                                                             | 9258285                   | No data for REN     |                 |
| 2  |                                                                                                                                                                                                                           |                                                                                                                                                                |                           |                     |                 |
| 3  |                                                                                                                                                                                                                           |                                                                                                                                                                |                           |                     |                 |
| 4  |                                                                                                                                                                                                                           |                                                                                                                                                                |                           |                     |                 |
| 5  |                                                                                                                                                                                                                           |                                                                                                                                                                |                           |                     |                 |
| 6  |                                                                                                                                                                                                                           |                                                                                                                                                                |                           |                     |                 |
| 7  |                                                                                                                                                                                                                           |                                                                                                                                                                |                           |                     |                 |
| 8  |                                                                                                                                                                                                                           |                                                                                                                                                                |                           |                     |                 |
| 9  |                                                                                                                                                                                                                           |                                                                                                                                                                |                           |                     |                 |
| 10 |                                                                                                                                                                                                                           |                                                                                                                                                                |                           |                     |                 |
| 11 | 1                                                                                                                                                                                                                         | Renin-aldosterone response, urinary Na/K ratio and growth in pseudohypoaldosteronism patients with mutations in epithelial sodium channel (ENaC) subunit genes | Hanukoglu A et al.        | 18634878            | No data for REN |
| 12 |                                                                                                                                                                                                                           |                                                                                                                                                                |                           |                     |                 |
| 13 | 1                                                                                                                                                                                                                         | Polymorphism of the angiotensin I-converting enzyme gene in diabetic nephropathy in type II diabetic patients with proliferative retinopathy.                  | Hanyu O et al.            | 9509566             | No data for REN |
| 14 |                                                                                                                                                                                                                           |                                                                                                                                                                |                           |                     |                 |
| 15 | 1                                                                                                                                                                                                                         | Increased frequency of angiotensin-converting enzyme DD genotype in patients with type 2 diabetes in Taiwan                                                    | Hsieh MC et al.           | 10862639            | No data for REN |
| 16 |                                                                                                                                                                                                                           |                                                                                                                                                                |                           |                     |                 |
| 17 |                                                                                                                                                                                                                           |                                                                                                                                                                |                           |                     |                 |
| 18 | 1                                                                                                                                                                                                                         | Genetic polymorphisms of the renin-angiotensin-aldosterone system in Chinese patients with end-stage renal disease secondary to IgA nephropathy                | Huang HD et al.           | 21163122            | No data for REN |
| 19 |                                                                                                                                                                                                                           |                                                                                                                                                                |                           |                     |                 |
| 20 | 1                                                                                                                                                                                                                         | Impact of Polymorphisms of the Genes Encoding Angiotensin II-Forming Enzymes on the Progression of IgA Nephropathy                                             | Jung ES et al.            | 21150220            | No data for REN |
| 21 |                                                                                                                                                                                                                           |                                                                                                                                                                |                           |                     |                 |
| 22 | 1                                                                                                                                                                                                                         | Study of the association of -667 aquaporin-2 (AQP-2) A/G promoter polymorphism with the incidence and clinical course of chronic kidney disease in Korea.      | Kang SW et al.            | 17763164            | No data for REN |
| 23 |                                                                                                                                                                                                                           |                                                                                                                                                                |                           |                     |                 |
| 24 | 1                                                                                                                                                                                                                         | Assessment of matrix Gla protein, Klotho gene polymorphisms, and oxidative stress in chronic kidney disease.                                                   | Karsli Ceppioglu S et al. | 21859400            | No data for REN |
| 25 |                                                                                                                                                                                                                           |                                                                                                                                                                |                           |                     |                 |
| 26 | 1                                                                                                                                                                                                                         | Renin-angiotensin system component gene polymorphisms in Japanese maintenance haemodialysis patients                                                           | Kawada N et al.           | WOS:000071880400005 | No data for REN |
| 27 |                                                                                                                                                                                                                           |                                                                                                                                                                |                           |                     |                 |
| 28 | 1                                                                                                                                                                                                                         | Manganese superoxide dismutase, glutathione peroxidase and catalase gene polymorphisms and clinical outcomes in acute kidney injury.                           | Kidir V et al.            | 26787049            | No data for REN |
| 29 |                                                                                                                                                                                                                           |                                                                                                                                                                |                           |                     |                 |
| 30 | 1                                                                                                                                                                                                                         | Blood Pressure-Related Genes and the Progression of IgA Nephropathy                                                                                            | Kim SM et al.             | 19729965            | No data for REN |
| 31 |                                                                                                                                                                                                                           |                                                                                                                                                                |                           |                     |                 |
| 32 | 1                                                                                                                                                                                                                         | Genetic Clues To The Etiology Of Balkan Endemic Nephropathy: Investigating The Role Of Ace And At1R Polymorphisms                                              | Krcunovic Z et al.        | WOS:000287217500011 | No data for REN |
| 33 |                                                                                                                                                                                                                           |                                                                                                                                                                |                           |                     |                 |
| 34 |                                                                                                                                                                                                                           |                                                                                                                                                                |                           |                     |                 |
| 35 |                                                                                                                                                                                                                           |                                                                                                                                                                |                           |                     |                 |
| 36 |                                                                                                                                                                                                                           |                                                                                                                                                                |                           |                     |                 |
| 37 |                                                                                                                                                                                                                           |                                                                                                                                                                |                           |                     |                 |
| 38 |                                                                                                                                                                                                                           |                                                                                                                                                                |                           |                     |                 |
| 39 |                                                                                                                                                                                                                           |                                                                                                                                                                |                           |                     |                 |
| 40 |                                                                                                                                                                                                                           |                                                                                                                                                                |                           |                     |                 |
| 41 |                                                                                                                                                                                                                           |                                                                                                                                                                |                           |                     |                 |
| 42 |                                                                                                                                                                                                                           |                                                                                                                                                                |                           |                     |                 |
| 43 |                                                                                                                                                                                                                           |                                                                                                                                                                |                           |                     |                 |
| 44 |                                                                                                                                                                                                                           |                                                                                                                                                                |                           |                     |                 |
| 45 |                                                                                                                                                                                                                           |                                                                                                                                                                |                           |                     |                 |
| 46 |                                                                                                                                                                                                                           |                                                                                                                                                                |                           |                     |                 |

|    |                                                                                      |                                                                                                                                                                        |                    |                 |                 |
|----|--------------------------------------------------------------------------------------|------------------------------------------------------------------------------------------------------------------------------------------------------------------------|--------------------|-----------------|-----------------|
| 1  | Effect of ACE gene on diabetic nephropathy in NIDDM patients with insulin resistance | Kuramoto N et al.                                                                                                                                                      | 10023638           | No data for REN |                 |
| 2  |                                                                                      |                                                                                                                                                                        |                    |                 |                 |
| 3  |                                                                                      |                                                                                                                                                                        |                    |                 |                 |
| 4  |                                                                                      |                                                                                                                                                                        |                    |                 |                 |
| 5  |                                                                                      |                                                                                                                                                                        |                    |                 |                 |
| 6  | 1                                                                                    | Association of apolipoprotein E gene polymorphism with end-stage renal disease and hyperlipidemia in patients on long-term hemodialysis.                               | Lahrach H et al.   | 25155022        | No data for REN |
| 7  |                                                                                      |                                                                                                                                                                        |                    |                 |                 |
| 8  |                                                                                      |                                                                                                                                                                        |                    |                 |                 |
| 9  |                                                                                      |                                                                                                                                                                        |                    |                 |                 |
| 10 |                                                                                      |                                                                                                                                                                        |                    |                 |                 |
| 11 | 1                                                                                    | Aldosterone synthase (CYP11B2)-344T/C polymorphism is not associated with the initiation and progression of diabetic nephropathy in Caucasian Type 1 diabetic patients | Lajer M et al.     | 16759311        | No data for REN |
| 12 |                                                                                      |                                                                                                                                                                        |                    |                 |                 |
| 13 |                                                                                      |                                                                                                                                                                        |                    |                 |                 |
| 14 | 1                                                                                    | Renal perfusion and the renal hemodynamic response to blocking the renin system in diabetes - Are the forces leading to vasodilation and vasoconstriction linked?      | Lansang MC et al.  | 12086929        | No data for REN |
| 15 |                                                                                      |                                                                                                                                                                        |                    |                 |                 |
| 16 |                                                                                      |                                                                                                                                                                        |                    |                 |                 |
| 17 |                                                                                      |                                                                                                                                                                        |                    |                 |                 |
| 18 | 1                                                                                    | Renin-angiotensin system gene polymorphisms: its impact on IgAN and its progression to end-stage renal failure among Chinese in Singapore.                             | Lau YK et al.      | 15153745        | No data for REN |
| 19 |                                                                                      |                                                                                                                                                                        |                    |                 |                 |
| 20 |                                                                                      |                                                                                                                                                                        |                    |                 |                 |
| 21 | 1                                                                                    | Association studies between the HSD11B2 gene (encoding human 11 beta-hydroxysteroid dehydrogenase type 2), type 1 diabetes mellitus and diabetic nephropathy           | Lavery GG et al.   | 11916625        | No data for REN |
| 22 |                                                                                      |                                                                                                                                                                        |                    |                 |                 |
| 23 |                                                                                      |                                                                                                                                                                        |                    |                 |                 |
| 24 | 1                                                                                    | Association of the genetic polymorphisms of the ACE gene and the eNOS gene with lupus nephropathy in northern Chinese population                                       | Li X et al.        | 20540812        | No data for REN |
| 25 |                                                                                      |                                                                                                                                                                        |                    |                 |                 |
| 26 |                                                                                      |                                                                                                                                                                        |                    |                 |                 |
| 27 | 1                                                                                    | The relationship between the TGF-beta1 gene -509C/T polymorphism and tubulointerstitial damage resulting from primary nephrotic syndrome.                              | Li Y et al.        | 20446778        | No data for REN |
| 28 |                                                                                      |                                                                                                                                                                        |                    |                 |                 |
| 29 |                                                                                      |                                                                                                                                                                        |                    |                 |                 |
| 30 | 1                                                                                    | Genes involved in the regulation of vascular homeostasis determine renal survival rate in patients with chronic glomerulonephritis                                     | Litovkina O et al. | 24727057        | No data for REN |
| 31 |                                                                                      |                                                                                                                                                                        |                    |                 |                 |
| 32 |                                                                                      |                                                                                                                                                                        |                    |                 |                 |
| 33 | 1                                                                                    | Factors affecting progression of renal insufficiency                                                                                                                   | Locatelli F et al. | 9387138         | No data for REN |
| 34 |                                                                                      |                                                                                                                                                                        |                    |                 |                 |
| 35 | 1                                                                                    | Polymorphism of renin-angiotensin system genes in dialysis patients - association with cerebrovascular disease                                                         | Losito A et al.    | 12454231        | No data for REN |
| 36 |                                                                                      |                                                                                                                                                                        |                    |                 |                 |
| 37 |                                                                                      |                                                                                                                                                                        |                    |                 |                 |
| 38 | 1                                                                                    | Genetic polymorphisms of the renin-angiotensin-aldosterone system in end-stage renal disease                                                                           | Lovati E et al.    | 11422735        | No data for REN |
| 39 |                                                                                      |                                                                                                                                                                        |                    |                 |                 |
| 40 |                                                                                      |                                                                                                                                                                        |                    |                 |                 |
| 41 |                                                                                      |                                                                                                                                                                        |                    |                 |                 |
| 42 |                                                                                      |                                                                                                                                                                        |                    |                 |                 |
| 43 |                                                                                      |                                                                                                                                                                        |                    |                 |                 |
| 44 |                                                                                      |                                                                                                                                                                        |                    |                 |                 |
| 45 |                                                                                      |                                                                                                                                                                        |                    |                 |                 |
| 46 |                                                                                      |                                                                                                                                                                        |                    |                 |                 |

|   |                                                                                                                                                                                        |                     |          |                 |
|---|----------------------------------------------------------------------------------------------------------------------------------------------------------------------------------------|---------------------|----------|-----------------|
| 1 | Effects of the genetic polymorphisms of the renin-angiotensin system on focal segmental glomerulosclerosis                                                                             | Luther Y et al.     | 14610337 | No data for REN |
| 1 | Angiotensinogen (AGT) gene missense polymorphisms (rs699 and rs4762) and diabetic nephropathy in Caucasians with type 2 diabetes mellitus.                                             | Makuc J et al.      | 28488548 | No data for REN |
| 1 | Impact of interferon-gamma and interleukin-4 gene polymorphisms on development and progression of IgA nephropathy in Japanese patients                                                 | Masutani K et al.   | 12552499 | No data for REN |
| 1 | Influence of the endothelial nitric oxide synthase polymorphism on the progression of autosomal dominant polycystic kidney disease and IgA nephropathy.                                | Merta M et al.      | 12212826 | No data for REN |
| 1 | Manganese Superoxide Dismutase (SOD2) Polymorphisms, Plasma Advanced Oxidation Protein Products (AOPP) Concentration and Risk of Kidney Complications in Subjects with Type 1 Diabetes | Mohammedi K et al.  | 24819633 | No data for REN |
| 1 | The effect of polymorphisms in the renin-angiotensin-aldosterone system on diabetic nephropathy risk                                                                                   | Mollsten A et al.   | 18413189 | No data for REN |
| 1 | A polymorphism in the angiotensin II type 1 receptor gene has different effects on the risk of diabetic nephropathy in men and women                                                   | Mollsten A et al.   | 21316998 | No data for REN |
| 1 | Different Mechanisms for the Progression of CKD with ACE Gene Polymorphisms                                                                                                            | Nakayama Y et al.   | 19293592 | No data for REN |
| 1 | Pronatriodilatin gene polymorphisms, microvascular permeability, and diabetic nephropathy in type 1 diabetes mellitus                                                                  | Nannipieri M et al. | 10405209 | No data for REN |
| 1 | A biallelic gene polymorphism of CYP11B2 predicts increased aldosterone to renin ratio in selected hypertensive patients.                                                              | Nicod J et al.      | 12788845 | No data for REN |
| 1 | Role of the alpha-adducin genotype on renal disease progression                                                                                                                        | Nicod J et al.      | 11918733 | No data for REN |
| 1 | Association between CCDC132, FDX1 and TNFSF13 gene polymorphisms and the risk of IgA nephropathy.                                                                                      | Niu D et al.        | 26370181 | No data for REN |
| 1 | Chemerin rs17173608 and vaspin rs2236242 gene variants on the risk of end stage renal disease (ESRD) and correlation with plasma malondialdehyde (MDA) level.                          | Nomani H et al.     | 29644922 | No data for REN |



|    |                                                                            |                                                                                                                                                                                      |                       |                 |                 |
|----|----------------------------------------------------------------------------|--------------------------------------------------------------------------------------------------------------------------------------------------------------------------------------|-----------------------|-----------------|-----------------|
| 1  | Renal clearance of endogenous erythropoietin in patients with proteinuria. | Nowicki M et al.                                                                                                                                                                     | 7759206               | No data for REN |                 |
| 2  |                                                                            |                                                                                                                                                                                      |                       |                 |                 |
| 3  |                                                                            |                                                                                                                                                                                      |                       |                 |                 |
| 4  | 1                                                                          | The renin--angiotensin system gene polymorphisms and clinicopathological correlations in IgA nephropathy.                                                                            | Ong-Ajyooth S et al.  | 10511770        | No data for REN |
| 5  |                                                                            |                                                                                                                                                                                      |                       |                 |                 |
| 6  | 1                                                                          | Angiotensin-converting enzyme polymorphism gene and evolution of nephropathy to end-stage renal disease                                                                              | Ortiz MA et al.       | 15012717        | No data for REN |
| 7  |                                                                            |                                                                                                                                                                                      |                       |                 |                 |
| 8  | 1                                                                          | Combinational effect of genes for the renin-angiotensin system in conferring susceptibility to diabetic nephropathy                                                                  | Osawa N et al.        | 17143591        | No data for REN |
| 9  |                                                                            |                                                                                                                                                                                      |                       |                 |                 |
| 10 | 1                                                                          | Bcii--RFLP profiles for serum amiloid A1 and mutated MEFV gene prevalence in chronic renal failure patients requiring long-term hemodialysis.                                        | Ozdemir O et al.      | 25394530        | No data for REN |
| 11 |                                                                            |                                                                                                                                                                                      |                       |                 |                 |
| 12 | 1                                                                          | Survival in type 2 diabetic patients in dialysis and the number of risk alleles in polymorphisms of the renin-angiotensin system genes                                               | Padro-Miquel A et al. | 19014923        | No data for REN |
| 13 |                                                                            |                                                                                                                                                                                      |                       |                 |                 |
| 14 | 1                                                                          | Association of aldosterone synthase (CYP11B2) gene -344T/C polymorphism with the risk of primary chronic glomerulonephritis in the Polish population.                                | Pawlik M et al.       | 23681285        | No data for REN |
| 15 |                                                                            |                                                                                                                                                                                      |                       |                 |                 |
| 16 | 1                                                                          | Does copy number variation of APOL1 gene affect the susceptibility to focal segmental glomerulosclerosis?                                                                            | Peng T et al.         | 28494221        | No data for REN |
| 17 |                                                                            |                                                                                                                                                                                      |                       |                 |                 |
| 18 | 1                                                                          | Association analysis of ADPRT1, AKR1B1, RAGE, GFPT2 and PAI-1 gene polymorphisms with chronic renal insufficiency among Asian Indians with type-2 diabetes                           | Prasad P et al.       | 20353610        | No data for REN |
| 19 |                                                                            |                                                                                                                                                                                      |                       |                 |                 |
| 20 | 1                                                                          | DNA repair genes XPD and XRCC1 polymorphisms and risk of end-stage renal disease in Egyptian population.                                                                             | Radwan WM et al.      | 25310768        | No data for REN |
| 21 |                                                                            |                                                                                                                                                                                      |                       |                 |                 |
| 22 | 1                                                                          | ACE I/D and MMP-7 A-181G variants and the risk of end stage renal disease                                                                                                            | Rahimi Z et al.       | 28447048        | No data for REN |
| 23 |                                                                            |                                                                                                                                                                                      |                       |                 |                 |
| 24 | 1                                                                          | Influence of angiotensin converting enzyme (ACE) gene rs4362 polymorphism on the progression of kidney failure in patients with autosomal dominant polycystic kidney disease (ADPKD) | Ramanathan G et al.   | 27748299        | No data for REN |
| 25 |                                                                            |                                                                                                                                                                                      |                       |                 |                 |
| 26 |                                                                            |                                                                                                                                                                                      |                       |                 |                 |
| 27 |                                                                            |                                                                                                                                                                                      |                       |                 |                 |
| 28 |                                                                            |                                                                                                                                                                                      |                       |                 |                 |
| 29 |                                                                            |                                                                                                                                                                                      |                       |                 |                 |
| 30 |                                                                            |                                                                                                                                                                                      |                       |                 |                 |
| 31 |                                                                            |                                                                                                                                                                                      |                       |                 |                 |
| 32 |                                                                            |                                                                                                                                                                                      |                       |                 |                 |
| 33 |                                                                            |                                                                                                                                                                                      |                       |                 |                 |
| 34 |                                                                            |                                                                                                                                                                                      |                       |                 |                 |
| 35 |                                                                            |                                                                                                                                                                                      |                       |                 |                 |
| 36 |                                                                            |                                                                                                                                                                                      |                       |                 |                 |
| 37 |                                                                            |                                                                                                                                                                                      |                       |                 |                 |
| 38 |                                                                            |                                                                                                                                                                                      |                       |                 |                 |
| 39 |                                                                            |                                                                                                                                                                                      |                       |                 |                 |
| 40 |                                                                            |                                                                                                                                                                                      |                       |                 |                 |
| 41 |                                                                            |                                                                                                                                                                                      |                       |                 |                 |
| 42 |                                                                            |                                                                                                                                                                                      |                       |                 |                 |
| 43 |                                                                            |                                                                                                                                                                                      |                       |                 |                 |
| 44 |                                                                            |                                                                                                                                                                                      |                       |                 |                 |
| 45 |                                                                            |                                                                                                                                                                                      |                       |                 |                 |
| 46 |                                                                            |                                                                                                                                                                                      |                       |                 |                 |

|    |                                                                                                                                                                      |                                                                                                                                                                                  |                      |                     |                 |
|----|----------------------------------------------------------------------------------------------------------------------------------------------------------------------|----------------------------------------------------------------------------------------------------------------------------------------------------------------------------------|----------------------|---------------------|-----------------|
| 1  | Aldosterone synthase gene is not a major susceptibility gene for progression of chronic kidney disease in patients with autosomal dominant polycystic kidney disease | Ramanathan G et al.                                                                                                                                                              | 28540892             | No data for REN     |                 |
| 2  |                                                                                                                                                                      |                                                                                                                                                                                  |                      |                     |                 |
| 3  |                                                                                                                                                                      |                                                                                                                                                                                  |                      |                     |                 |
| 4  |                                                                                                                                                                      |                                                                                                                                                                                  |                      |                     |                 |
| 5  |                                                                                                                                                                      |                                                                                                                                                                                  |                      |                     |                 |
| 6  | 1                                                                                                                                                                    | AGTR1 rs5186 variants in patients with type 2 diabetes mellitus and nephropathy                                                                                                  | Razi F et al.        | WOS:000419720600009 | No data for REN |
| 7  |                                                                                                                                                                      |                                                                                                                                                                                  |                      |                     |                 |
| 8  |                                                                                                                                                                      |                                                                                                                                                                                  |                      |                     |                 |
| 9  |                                                                                                                                                                      |                                                                                                                                                                                  |                      |                     |                 |
| 10 |                                                                                                                                                                      |                                                                                                                                                                                  |                      |                     |                 |
| 11 | 1                                                                                                                                                                    | Association of the angiotensinogen M235T and APO E gene polymorphisms in Turkish type 2 diabetic patients with and without nephropathy.                                          | Reis KA et al.       | 21500980            | No data for REN |
| 12 |                                                                                                                                                                      |                                                                                                                                                                                  |                      |                     |                 |
| 13 |                                                                                                                                                                      |                                                                                                                                                                                  |                      |                     |                 |
| 14 | 1                                                                                                                                                                    | The influence of the endothelin-converting enzyme-1 gene polymorphism on the progression of autosomal dominant polycystic kidney disease.                                        | Reiterova J et al.   | 16526315            | No data for REN |
| 15 |                                                                                                                                                                      |                                                                                                                                                                                  |                      |                     |                 |
| 16 |                                                                                                                                                                      |                                                                                                                                                                                  |                      |                     |                 |
| 17 |                                                                                                                                                                      |                                                                                                                                                                                  |                      |                     |                 |
| 18 | 1                                                                                                                                                                    | The influence of G-protein beta3-subunit gene and endothelial nitric oxide synthase gene in exon 7 polymorphisms on progression of autosomal dominant polycystic kidney disease. | Reiterova J et al.   | 15287194            | No data for REN |
| 19 |                                                                                                                                                                      |                                                                                                                                                                                  |                      |                     |                 |
| 20 |                                                                                                                                                                      |                                                                                                                                                                                  |                      |                     |                 |
| 21 |                                                                                                                                                                      |                                                                                                                                                                                  |                      |                     |                 |
| 22 | 1                                                                                                                                                                    | Role of ADDUCIN Gly460Trp, ACE I/D and AGT M235T Gene Polymorphisms in Genetic Susceptibility to Diabetic Nephropathy                                                            | Sancakdar E et al.   | WOS:000367541400005 | No data for REN |
| 23 |                                                                                                                                                                      |                                                                                                                                                                                  |                      |                     |                 |
| 24 |                                                                                                                                                                      |                                                                                                                                                                                  |                      |                     |                 |
| 25 | 1                                                                                                                                                                    | Angiotensin I converting enzyme gene polymorphism and diabetic nephropathy in type II diabetes                                                                                   | Schmidt S et al.     | 9269698             | No data for REN |
| 26 |                                                                                                                                                                      |                                                                                                                                                                                  |                      |                     |                 |
| 27 | 1                                                                                                                                                                    | ACAC1 <sup>2</sup> gene (rs2268388) and AGTR1 gene (rs5186) polymorphism and the risk of nephropathy in Asian Indian patients with type 2 diabetes.                              | Shah VN et al.       | 23081748            | No data for REN |
| 28 |                                                                                                                                                                      |                                                                                                                                                                                  |                      |                     |                 |
| 29 |                                                                                                                                                                      |                                                                                                                                                                                  |                      |                     |                 |
| 30 | 1                                                                                                                                                                    | Genetic variants of ACE (Insertion/Deletion) and AGT (M268T) genes in patients with diabetes and nephropathy                                                                     | Shaikh R et al.      | 24737640            | No data for REN |
| 31 |                                                                                                                                                                      |                                                                                                                                                                                  |                      |                     |                 |
| 32 | 1                                                                                                                                                                    | Distribution of ACE I/D Polymorphism in the Patients of Diabetes and Nephropathy in Pakistan                                                                                     | Shaikh R et al.      | WOS:000312053000001 | No data for REN |
| 33 |                                                                                                                                                                      |                                                                                                                                                                                  |                      |                     |                 |
| 34 |                                                                                                                                                                      |                                                                                                                                                                                  |                      |                     |                 |
| 35 | 1                                                                                                                                                                    | The relationship between genetic and haemodynamic factors in diabetic nephropathy (DN): Case-control study in type 1 diabetes mellitus (T1DM)                                    | Shestakova MV et al. | WOS:000242410600010 | No data for REN |
| 36 |                                                                                                                                                                      |                                                                                                                                                                                  |                      |                     |                 |
| 37 |                                                                                                                                                                      |                                                                                                                                                                                  |                      |                     |                 |
| 38 |                                                                                                                                                                      |                                                                                                                                                                                  |                      |                     |                 |
| 39 |                                                                                                                                                                      |                                                                                                                                                                                  |                      |                     |                 |
| 40 |                                                                                                                                                                      |                                                                                                                                                                                  |                      |                     |                 |
| 41 |                                                                                                                                                                      |                                                                                                                                                                                  |                      |                     |                 |
| 42 |                                                                                                                                                                      |                                                                                                                                                                                  |                      |                     |                 |
| 43 |                                                                                                                                                                      |                                                                                                                                                                                  |                      |                     |                 |
| 44 |                                                                                                                                                                      |                                                                                                                                                                                  |                      |                     |                 |
| 45 |                                                                                                                                                                      |                                                                                                                                                                                  |                      |                     |                 |
| 46 |                                                                                                                                                                      |                                                                                                                                                                                  |                      |                     |                 |

|    |                                                                                                                                              |                                                                                                                                                      |                      |                 |                 |
|----|----------------------------------------------------------------------------------------------------------------------------------------------|------------------------------------------------------------------------------------------------------------------------------------------------------|----------------------|-----------------|-----------------|
| 1  | SIRTUIN 1 gene polymorphisms are associated with cholesterol metabolism and coronary artery calcification in Japanese hemodialysis patients. | Shimoyama Y et al.                                                                                                                                   | 22200427             | No data for REN |                 |
| 2  |                                                                                                                                              |                                                                                                                                                      |                      |                 |                 |
| 3  |                                                                                                                                              |                                                                                                                                                      |                      |                 |                 |
| 4  |                                                                                                                                              |                                                                                                                                                      |                      |                 |                 |
| 5  |                                                                                                                                              |                                                                                                                                                      |                      |                 |                 |
| 6  | 1                                                                                                                                            |                                                                                                                                                      |                      |                 |                 |
| 7  | 1                                                                                                                                            | Interleukin 1 receptor antagonist and tumor necrosis factor-alpha gene polymorphism in patients with end-stage renal failure.                        | Shu KH et al.        | 15717635        | No data for REN |
| 8  |                                                                                                                                              |                                                                                                                                                      |                      |                 |                 |
| 9  |                                                                                                                                              |                                                                                                                                                      |                      |                 |                 |
| 10 | 1                                                                                                                                            | Angiotensin-converting enzyme (ACE) inhibition in type 2, diabetic patients - interaction with ACE insertion/deletion polymorphism                   | So WY et al.         | 16395257        | No data for REN |
| 11 |                                                                                                                                              |                                                                                                                                                      |                      |                 |                 |
| 12 | 1                                                                                                                                            | Vitamin D binding protein and the need for vitamin D in hemodialysis patients.                                                                       | Speeckaert MM et al. | 18721734        | No data for REN |
| 13 |                                                                                                                                              |                                                                                                                                                      |                      |                 |                 |
| 14 | 1                                                                                                                                            | Polymorphisms of the renin-angiotensin system genes in Brazilian patients with lupus nephropathy                                                     | Sprovieri SRS et al. | 15934435        | No data for REN |
| 15 |                                                                                                                                              |                                                                                                                                                      |                      |                 |                 |
| 16 | 1                                                                                                                                            | Prospective study on the potential of RAAS blockade to halt renal disease in Alport syndrome patients with heterozygous mutations.                   | Stock J et al.       | 27402170        | No data for REN |
| 17 |                                                                                                                                              |                                                                                                                                                      |                      |                 |                 |
| 18 | 1                                                                                                                                            | Interaction between gene polymorphisms of nitric oxide synthase and renin-angiotensin system in the progression of membranous glomerulonephritis     | Stratta P et al.     | 14767013        | No data for REN |
| 19 |                                                                                                                                              |                                                                                                                                                      |                      |                 |                 |
| 20 | 1                                                                                                                                            | Angiotensin II receptor type 1 A1166C modifies the association between angiotensinogen M235T and chronic kidney disease                              | Su SL et al.         | 29296205        | No data for REN |
| 21 |                                                                                                                                              |                                                                                                                                                      |                      |                 |                 |
| 22 | 1                                                                                                                                            | Gene polymorphisms of angiotensin-converting enzyme and angiotensin II Type 1 receptor among chronic kidney disease patients in a Chinese population | Su SL et al.         | 22147663        | No data for REN |
| 23 |                                                                                                                                              |                                                                                                                                                      |                      |                 |                 |
| 24 | 1                                                                                                                                            | Gene-Gene Interactions in Renin-Angiotensin-Aldosterone System Contributes to End-Stage Renal Disease Susceptibility in a Han Chinese Population     | Su SL et al.         | 24977181        | No data for REN |
| 25 |                                                                                                                                              |                                                                                                                                                      |                      |                 |                 |
| 26 | 1                                                                                                                                            | Study on 3'-UTR length polymorphism in peripheral blood mononuclear cells of uremia patient.                                                         | Sui W et al.         | 26554293        | No data for REN |
| 27 |                                                                                                                                              |                                                                                                                                                      |                      |                 |                 |
| 28 | 1                                                                                                                                            | Angiotensin-II type 1 receptor gene polymorphism and diabetic microangiopathy.                                                                       | Tarnow L et al.      | 8671962         | No data for REN |
| 29 |                                                                                                                                              |                                                                                                                                                      |                      |                 |                 |
| 30 |                                                                                                                                              |                                                                                                                                                      |                      |                 |                 |
| 31 |                                                                                                                                              |                                                                                                                                                      |                      |                 |                 |
| 32 |                                                                                                                                              |                                                                                                                                                      |                      |                 |                 |
| 33 |                                                                                                                                              |                                                                                                                                                      |                      |                 |                 |
| 34 |                                                                                                                                              |                                                                                                                                                      |                      |                 |                 |
| 35 |                                                                                                                                              |                                                                                                                                                      |                      |                 |                 |
| 36 |                                                                                                                                              |                                                                                                                                                      |                      |                 |                 |
| 37 |                                                                                                                                              |                                                                                                                                                      |                      |                 |                 |
| 38 |                                                                                                                                              |                                                                                                                                                      |                      |                 |                 |
| 39 |                                                                                                                                              |                                                                                                                                                      |                      |                 |                 |
| 40 |                                                                                                                                              |                                                                                                                                                      |                      |                 |                 |
| 41 |                                                                                                                                              |                                                                                                                                                      |                      |                 |                 |
| 42 |                                                                                                                                              |                                                                                                                                                      |                      |                 |                 |
| 43 |                                                                                                                                              |                                                                                                                                                      |                      |                 |                 |
| 44 |                                                                                                                                              |                                                                                                                                                      |                      |                 |                 |
| 45 |                                                                                                                                              |                                                                                                                                                      |                      |                 |                 |
| 46 |                                                                                                                                              |                                                                                                                                                      |                      |                 |                 |

|    |                                                                                                                                                                                     |                 |         |                 |
|----|-------------------------------------------------------------------------------------------------------------------------------------------------------------------------------------|-----------------|---------|-----------------|
| 1  | Lack Of Relationship Between An Insertion Deletion Polymorphism In The Angiotensin I-Converting Enzyme Gene And Diabetic Nephropathy And Proliferative Retinopathy In Iddm Patients | Tarnow L et al. | 7729604 | No data for REN |
| 2  |                                                                                                                                                                                     |                 |         |                 |
| 3  |                                                                                                                                                                                     |                 |         |                 |
| 4  |                                                                                                                                                                                     |                 |         |                 |
| 5  |                                                                                                                                                                                     |                 |         |                 |
| 6  |                                                                                                                                                                                     |                 |         |                 |
| 7  |                                                                                                                                                                                     |                 |         |                 |
| 8  |                                                                                                                                                                                     |                 |         |                 |
| 9  |                                                                                                                                                                                     |                 |         |                 |
| 10 |                                                                                                                                                                                     |                 |         |                 |
| 11 |                                                                                                                                                                                     |                 |         |                 |
| 12 |                                                                                                                                                                                     |                 |         |                 |
| 13 |                                                                                                                                                                                     |                 |         |                 |
| 14 |                                                                                                                                                                                     |                 |         |                 |
| 15 |                                                                                                                                                                                     |                 |         |                 |
| 16 |                                                                                                                                                                                     |                 |         |                 |
| 17 |                                                                                                                                                                                     |                 |         |                 |
| 18 |                                                                                                                                                                                     |                 |         |                 |
| 19 |                                                                                                                                                                                     |                 |         |                 |
| 20 |                                                                                                                                                                                     |                 |         |                 |
| 21 |                                                                                                                                                                                     |                 |         |                 |
| 22 |                                                                                                                                                                                     |                 |         |                 |
| 23 |                                                                                                                                                                                     |                 |         |                 |
| 24 |                                                                                                                                                                                     |                 |         |                 |
| 25 |                                                                                                                                                                                     |                 |         |                 |
| 26 |                                                                                                                                                                                     |                 |         |                 |
| 27 |                                                                                                                                                                                     |                 |         |                 |
| 28 |                                                                                                                                                                                     |                 |         |                 |
| 29 |                                                                                                                                                                                     |                 |         |                 |
| 30 |                                                                                                                                                                                     |                 |         |                 |
| 31 |                                                                                                                                                                                     |                 |         |                 |
| 32 |                                                                                                                                                                                     |                 |         |                 |
| 33 |                                                                                                                                                                                     |                 |         |                 |
| 34 |                                                                                                                                                                                     |                 |         |                 |
| 35 |                                                                                                                                                                                     |                 |         |                 |
| 36 |                                                                                                                                                                                     |                 |         |                 |
| 37 |                                                                                                                                                                                     |                 |         |                 |
| 38 |                                                                                                                                                                                     |                 |         |                 |
| 39 |                                                                                                                                                                                     |                 |         |                 |
| 40 |                                                                                                                                                                                     |                 |         |                 |
| 41 |                                                                                                                                                                                     |                 |         |                 |
| 42 |                                                                                                                                                                                     |                 |         |                 |
| 43 |                                                                                                                                                                                     |                 |         |                 |
| 44 |                                                                                                                                                                                     |                 |         |                 |
| 45 |                                                                                                                                                                                     |                 |         |                 |
| 46 |                                                                                                                                                                                     |                 |         |                 |

|    |                                                                                                                                                          |                                                                                                                                      |                    |                 |                 |
|----|----------------------------------------------------------------------------------------------------------------------------------------------------------|--------------------------------------------------------------------------------------------------------------------------------------|--------------------|-----------------|-----------------|
| 1  | Impact of interaction of cigarette smoking with angiotensin-converting enzyme polymorphisms on end-stage renal disease risk in a Han Chinese population. | Yang HY et al.                                                                                                                       | 23477970           | No data for REN |                 |
| 2  |                                                                                                                                                          |                                                                                                                                      |                    |                 |                 |
| 3  |                                                                                                                                                          |                                                                                                                                      |                    |                 |                 |
| 4  |                                                                                                                                                          |                                                                                                                                      |                    |                 |                 |
| 5  |                                                                                                                                                          |                                                                                                                                      |                    |                 |                 |
| 6  |                                                                                                                                                          |                                                                                                                                      |                    |                 |                 |
| 7  |                                                                                                                                                          |                                                                                                                                      |                    |                 |                 |
| 8  | 1                                                                                                                                                        | Angiotensin converting enzyme gene polymorphism and development of post-transplant erythrocytosis.                                   | Yildiz A et al.    | 12832741        | No data for REN |
| 9  |                                                                                                                                                          |                                                                                                                                      |                    |                 |                 |
| 10 | 1                                                                                                                                                        | Aldosterone Synthase CYP11B2 Gene Promoter Polymorphism in a Turkish Population With Chronic Kidney Disease                          | Yilmaz M et al.    | 25957425        | No data for REN |
| 11 |                                                                                                                                                          |                                                                                                                                      |                    |                 |                 |
| 12 | 1                                                                                                                                                        | Structural analysis of the 11 beta-hydroxysteroid dehydrogenase type 2 gene in end-stage renal disease                               | Zaehner T et al.   | 11012876        | No data for REN |
| 13 |                                                                                                                                                          |                                                                                                                                      |                    |                 |                 |
| 14 | 1                                                                                                                                                        | Arg913Gln of SLC12A3 gene promotes development and progression of end-stage renal disease in Chinese type 2 diabetes mellitus        | Zhang R et al.     | 28744814        | No data for REN |
| 15 |                                                                                                                                                          |                                                                                                                                      |                    |                 |                 |
| 16 | 1                                                                                                                                                        | Pin1 and secondary hyperparathyroidism of chronic kidney disease: gene polymorphisms and protein levels.                             | Zhao Y et al.      | 27876426        | No data for REN |
| 17 |                                                                                                                                                          |                                                                                                                                      |                    |                 |                 |
| 18 | 1                                                                                                                                                        | Polymorphisms in NADPH oxidase CYBA gene modify the risk of ESRD in patients with chronic glomerulonephritis.                        | Zhou H et al.      | 26627442        | No data for REN |
| 19 |                                                                                                                                                          |                                                                                                                                      |                    |                 |                 |
| 20 | 1                                                                                                                                                        | Angiotensinogen M235T and chymase gene CMA/B polymorphisms are not associated with nephropathy in type II diabetes                   | Zychma MJ et al.   | 11096141        | No data for REN |
| 21 |                                                                                                                                                          |                                                                                                                                      |                    |                 |                 |
| 22 | 1                                                                                                                                                        | Effects of Diets with Different Proportions of Protein/Carbohydrate on Retinal Manifestations in db Mice                             | Arimura E et al.   | 29475908        | Non-human study |
| 23 |                                                                                                                                                          |                                                                                                                                      |                    |                 |                 |
| 24 | 1                                                                                                                                                        | Effects of plasma kallikrein deficiency on haemostasis and thrombosis in mice: Murine Ortholog of the Fletcher Trait                 | Bird JE et al.     | 22398951        | Non-human study |
| 25 |                                                                                                                                                          |                                                                                                                                      |                    |                 |                 |
| 26 | 1                                                                                                                                                        | Blood pressure and renin-angiotensin system resetting in transgenic rats with elevated plasma Val(5)-angiotensinogen                 | Bohlender J et al. | 22728903        | Non-human study |
| 27 |                                                                                                                                                          |                                                                                                                                      |                    |                 |                 |
| 28 | 1                                                                                                                                                        | Angiotensin II mesenteric and renal vasoregulation: Dissimilar modulatory effects with nitroprusside                                 | Broome M et al.    | 11065204        | Non-human study |
| 29 |                                                                                                                                                          |                                                                                                                                      |                    |                 |                 |
| 30 | 1                                                                                                                                                        | N-domain angiotensin I-converting enzyme expression in renal artery of Wistar, Wistar Kyoto, and spontaneously hypertensive rats     | Bueno V et al.     | 15194348        | Non-human study |
| 31 |                                                                                                                                                          |                                                                                                                                      |                    |                 |                 |
| 32 | 1                                                                                                                                                        | Adrenomedullin gene expression differences in mice do not affect blood pressure but modulate hypertension-induced pathology in males | Caron K et al.     | 17360661        | Non-human study |
| 33 |                                                                                                                                                          |                                                                                                                                      |                    |                 |                 |
| 34 |                                                                                                                                                          |                                                                                                                                      |                    |                 |                 |
| 35 |                                                                                                                                                          |                                                                                                                                      |                    |                 |                 |
| 36 |                                                                                                                                                          |                                                                                                                                      |                    |                 |                 |
| 37 |                                                                                                                                                          |                                                                                                                                      |                    |                 |                 |
| 38 |                                                                                                                                                          |                                                                                                                                      |                    |                 |                 |
| 39 |                                                                                                                                                          |                                                                                                                                      |                    |                 |                 |
| 40 |                                                                                                                                                          |                                                                                                                                      |                    |                 |                 |
| 41 |                                                                                                                                                          |                                                                                                                                      |                    |                 |                 |
| 42 |                                                                                                                                                          |                                                                                                                                      |                    |                 |                 |
| 43 |                                                                                                                                                          |                                                                                                                                      |                    |                 |                 |
| 44 |                                                                                                                                                          |                                                                                                                                      |                    |                 |                 |
| 45 |                                                                                                                                                          |                                                                                                                                      |                    |                 |                 |
| 46 |                                                                                                                                                          |                                                                                                                                      |                    |                 |                 |

|    |                                                                                                                |                                                                                                                                                                  |                            |                 |                 |
|----|----------------------------------------------------------------------------------------------------------------|------------------------------------------------------------------------------------------------------------------------------------------------------------------|----------------------------|-----------------|-----------------|
| 1  | Appropriate regulation of renin and blood pressure in 45-kb human renin/human angiotensinogen transgenic mice. | Catanzaro DF et al.                                                                                                                                              | 9931123                    | Non-human study |                 |
| 2  |                                                                                                                |                                                                                                                                                                  |                            |                 |                 |
| 3  |                                                                                                                |                                                                                                                                                                  |                            |                 |                 |
| 4  |                                                                                                                |                                                                                                                                                                  |                            |                 |                 |
| 5  |                                                                                                                |                                                                                                                                                                  |                            |                 |                 |
| 6  | 1                                                                                                              | Vascular and renal effects of vasopeptidase inhibition and angiotensin-converting enzyme blockade in spontaneously diabetic Goto-Kakizaki rats                   | Cheng ZJ et al.            | 16093923        | Non-human study |
| 7  |                                                                                                                |                                                                                                                                                                  |                            |                 |                 |
| 8  |                                                                                                                |                                                                                                                                                                  |                            |                 |                 |
| 9  |                                                                                                                |                                                                                                                                                                  |                            |                 |                 |
| 10 | 1                                                                                                              | Mice lacking endothelial ACE - Normal blood pressure with elevated angiotensin                                                                                   | Cole JM et al.             | 12574101        | Non-human study |
| 11 |                                                                                                                |                                                                                                                                                                  |                            |                 |                 |
| 12 |                                                                                                                |                                                                                                                                                                  |                            |                 |                 |
| 13 | 1                                                                                                              | Thyroid hormones stimulate renal expression of CFTR                                                                                                              | de Andrade Pinto AC et al. | 17595518        | Non-human study |
| 14 |                                                                                                                |                                                                                                                                                                  |                            |                 |                 |
| 15 | 1                                                                                                              | Renin-angiotensin system transgenic mouse model recapitulates pathophysiology similar to human preeclampsia with renal injury that may be mediated through VEGF. | Denney JM et al.           | 27927648        | Non-human study |
| 16 |                                                                                                                |                                                                                                                                                                  |                            |                 |                 |
| 17 |                                                                                                                |                                                                                                                                                                  |                            |                 |                 |
| 18 | 1                                                                                                              | Cardiac angiotensin-(1-12) expression and systemic hypertension in rats expressing the human angiotensinogen gene.                                               | Ferrario CM et al.         | 26873967        | Non-human study |
| 19 |                                                                                                                |                                                                                                                                                                  |                            |                 |                 |
| 20 |                                                                                                                |                                                                                                                                                                  |                            |                 |                 |
| 21 | 1                                                                                                              | Attenuation of accelerated renal cystogenesis in Pkd1 mice by renin-angiotensin system blockade                                                                  | Fitzgibbon WR et al.       | 29021226        | Non-human study |
| 22 |                                                                                                                |                                                                                                                                                                  |                            |                 |                 |
| 23 |                                                                                                                |                                                                                                                                                                  |                            |                 |                 |
| 24 | 1                                                                                                              | Renal cyst growth is the main determinant for hypertension and concentrating deficit in Pkd1-deficient mice                                                      | Fonseca JM et al.          | 24429399        | Non-human study |
| 25 |                                                                                                                |                                                                                                                                                                  |                            |                 |                 |
| 26 | 1                                                                                                              | Adenosine A(1) receptor-dependent and independent pathways in modulating renal vascular responses to angiotensin II                                              | Gao X et al.               | 25251152        | Non-human study |
| 27 |                                                                                                                |                                                                                                                                                                  |                            |                 |                 |
| 28 |                                                                                                                |                                                                                                                                                                  |                            |                 |                 |
| 29 | 1                                                                                                              | Collecting duct-specific knockout of nitric oxide synthase 3 impairs water excretion in a sex-dependent manner                                                   | Gao Y et al.               | 27707708        | Non-human study |
| 30 |                                                                                                                |                                                                                                                                                                  |                            |                 |                 |
| 31 | 1                                                                                                              | Metformin prevents the impairment of endothelium-dependent vascular relaxation induced by high glucose challenge in rabbit isolated perfused kidneys             | Gomes MB et al.            | 16133490        | Non-human study |
| 32 |                                                                                                                |                                                                                                                                                                  |                            |                 |                 |
| 33 |                                                                                                                |                                                                                                                                                                  |                            |                 |                 |
| 34 |                                                                                                                |                                                                                                                                                                  |                            |                 |                 |
| 35 | 1                                                                                                              | Effect Of Nitric-Oxide On Renin Secretion .1. Studies In Isolated Juxtaglomerular Granular Cells                                                                 | Greenberg SG et al.        | 7771523         | Non-human study |
| 36 |                                                                                                                |                                                                                                                                                                  |                            |                 |                 |
| 37 |                                                                                                                |                                                                                                                                                                  |                            |                 |                 |
| 38 |                                                                                                                |                                                                                                                                                                  |                            |                 |                 |
| 39 |                                                                                                                |                                                                                                                                                                  |                            |                 |                 |
| 40 |                                                                                                                |                                                                                                                                                                  |                            |                 |                 |
| 41 |                                                                                                                |                                                                                                                                                                  |                            |                 |                 |
| 42 |                                                                                                                |                                                                                                                                                                  |                            |                 |                 |
| 43 |                                                                                                                |                                                                                                                                                                  |                            |                 |                 |
| 44 |                                                                                                                |                                                                                                                                                                  |                            |                 |                 |
| 45 |                                                                                                                |                                                                                                                                                                  |                            |                 |                 |
| 46 |                                                                                                                |                                                                                                                                                                  |                            |                 |                 |

|    |                                                                             |                                                                                                                                                                                     |                           |                 |                 |
|----|-----------------------------------------------------------------------------|-------------------------------------------------------------------------------------------------------------------------------------------------------------------------------------|---------------------------|-----------------|-----------------|
| 1  | Effect of the angiotensinogen genotype on experimental hypertension in mice | Handtrack C et al.                                                                                                                                                                  | 17333097                  | Non-human study |                 |
| 2  |                                                                             |                                                                                                                                                                                     |                           |                 |                 |
| 3  |                                                                             |                                                                                                                                                                                     |                           |                 |                 |
| 4  | 1                                                                           | Pituitary adenylate cyclase-activating polypeptide stimulates renin secretion via activation of PAC1 receptors                                                                      | Hautmann M et al.         | 17360952        | Non-human study |
| 5  |                                                                             |                                                                                                                                                                                     |                           |                 |                 |
| 6  | 1                                                                           | The genetic deletion of Mas abolishes salt induced hypertension in mice                                                                                                             | Heringer-Walther S et al. | 22652430        | Non-human study |
| 7  |                                                                             |                                                                                                                                                                                     |                           |                 |                 |
| 8  | 1                                                                           | An essential role of angiotensin II receptor type 1a in recipient kidney, not in transplanted peripheral blood leukocytes, in progressive immune-mediated renal injury              | Hisada Y et al.           | 11555672        | Non-human study |
| 9  |                                                                             |                                                                                                                                                                                     |                           |                 |                 |
| 10 | 1                                                                           | The angiotensin type II receptor tonically inhibits angiotensin-converting enzyme in AT2 null mutant mice                                                                           | Hunley TE et al.          | 10652034        | Non-human study |
| 11 |                                                                             |                                                                                                                                                                                     |                           |                 |                 |
| 12 | 1                                                                           | Collecting Duct Nitric Oxide Synthase 1 beta Activation Maintains Sodium Homeostasis During High Sodium Intake Through Suppression of Aldosterone and Renal Angiotensin II Pathways | Hyndman KA et al.         | 29066445        | Non-human study |
| 13 |                                                                             |                                                                                                                                                                                     |                           |                 |                 |
| 14 | 1                                                                           | Transfer of a salt-resistant renin allele raises blood pressure in Dahl salt-sensitive rats                                                                                         | Jiang J et al.            | 9040448         | Non-human study |
| 15 |                                                                             |                                                                                                                                                                                     |                           |                 |                 |
| 16 | 1                                                                           | Angiotensin-converting enzyme inhibition attenuates the progression of rat hepatic fibrosis                                                                                         | Jonsson JR et al.         | 11438504        | Non-human study |
| 17 |                                                                             |                                                                                                                                                                                     |                           |                 |                 |
| 18 | 1                                                                           | Rat Ace allele variation determines susceptibility to AngII-induced renal damage                                                                                                    | Kamilic J et al.          | 21788250        | Non-human study |
| 19 |                                                                             |                                                                                                                                                                                     |                           |                 |                 |
| 20 | 1                                                                           | Regulation of renin secretion and expression in mice deficient in ss 1- and ss 2-adrenergic receptors                                                                               | Kim SM et al.             | 17515456        | Non-human study |
| 21 |                                                                             |                                                                                                                                                                                     |                           |                 |                 |
| 22 | 1                                                                           | Low Blood Pressure in Endothelial Cell-Specific Endothelin 1 Knockout Mice                                                                                                          | Kisanuki YY et al.        | 20516397        | Non-human study |
| 23 |                                                                             |                                                                                                                                                                                     |                           |                 |                 |
| 24 | 1                                                                           | Lack of an effect of collecting duct-specific deletion of adenylyl cyclase 3 on renal Na <sup>+</sup> and water excretion or arterial pressure                                      | Kittikulsuth W et al.     | 24431204        | Non-human study |
| 25 |                                                                             |                                                                                                                                                                                     |                           |                 |                 |
| 26 |                                                                             |                                                                                                                                                                                     |                           |                 |                 |
| 27 |                                                                             |                                                                                                                                                                                     |                           |                 |                 |
| 28 |                                                                             |                                                                                                                                                                                     |                           |                 |                 |
| 29 |                                                                             |                                                                                                                                                                                     |                           |                 |                 |
| 30 |                                                                             |                                                                                                                                                                                     |                           |                 |                 |
| 31 |                                                                             |                                                                                                                                                                                     |                           |                 |                 |
| 32 |                                                                             |                                                                                                                                                                                     |                           |                 |                 |
| 33 |                                                                             |                                                                                                                                                                                     |                           |                 |                 |
| 34 |                                                                             |                                                                                                                                                                                     |                           |                 |                 |
| 35 |                                                                             |                                                                                                                                                                                     |                           |                 |                 |
| 36 |                                                                             |                                                                                                                                                                                     |                           |                 |                 |
| 37 |                                                                             |                                                                                                                                                                                     |                           |                 |                 |
| 38 |                                                                             |                                                                                                                                                                                     |                           |                 |                 |
| 39 |                                                                             |                                                                                                                                                                                     |                           |                 |                 |
| 40 |                                                                             |                                                                                                                                                                                     |                           |                 |                 |
| 41 |                                                                             |                                                                                                                                                                                     |                           |                 |                 |
| 42 |                                                                             |                                                                                                                                                                                     |                           |                 |                 |
| 43 |                                                                             |                                                                                                                                                                                     |                           |                 |                 |
| 44 |                                                                             |                                                                                                                                                                                     |                           |                 |                 |
| 45 |                                                                             |                                                                                                                                                                                     |                           |                 |                 |
| 46 |                                                                             |                                                                                                                                                                                     |                           |                 |                 |

|    |   |                                                                                                                                                                     |                   |          |                 |
|----|---|---------------------------------------------------------------------------------------------------------------------------------------------------------------------|-------------------|----------|-----------------|
| 1  | 1 | A High Fat Diet During Pregnancy and Lactation Induces Cardiac and Renal Abnormalities in GLUT4+/- Male Mice                                                        | Kruse M et al.    | 28750406 | Non-human study |
| 2  | 1 | Blood pressure and renal hemodynamic responses to acute angiotensin II infusion are enhanced in a female mouse model of systemic lupus erythematosus                | Kumari S et al.   | 27350671 | Non-human study |
| 3  | 1 | Control of renin secretion from kidneys with renin cell hyperplasia                                                                                                 | Kurt B et al.     | 24285498 | Non-human study |
| 4  | 1 | Reciprocal expression of connexin 40 and 45 during phenotypical changes in renin-secreting cells                                                                    | Kurt B et al.     | 21209011 | Non-human study |
| 5  | 1 | Stimulation of renin secretion by NO donors is related to the cAMP pathway                                                                                          | Kurtz A et al.    | 9575895  | Non-human study |
| 6  | 1 | Stimulation of renin secretion by nitric oxide is mediated by phosphodiesterase 3                                                                                   | Kurtz A et al.    | 9539809  | Non-human study |
| 7  | 1 | Replacement of connexin 40 by connexin 45 causes ectopic localization of renin-producing cells in the kidney but maintains in vivo control of renin gene expression | Kurtz L et al.    | 19474190 | Non-human study |
| 8  | 1 | Interference with Gs $\pm$ -Coupled Receptor Signaling in Renin-Producing Cells Leads to Renal Endothelial Damage.                                                  | Lachmann P et al. | 28775003 | Non-human study |
| 9  | 1 | The angiotensin II receptor blocker candesartan improves survival and mesenteric perfusion in an acute porcine endotoxin model                                      | Laesser M et al.  | 14995942 | Non-human study |
| 10 | 1 | Mice with targeted disruption of the acyl-CoA binding protein display attenuated urine concentrating ability and diminished renal aquaporin-3 abundance             | Langaa S et al.   | 22237802 | Non-human study |
| 11 | 1 | Physiological impact of increased expression of the AT(1) angiotensin receptor                                                                                      | Le TH et al.      | 12963678 | Non-human study |
| 12 | 1 | Genetic analysis of the S-A and Na <sup>+</sup> /K <sup>+</sup> -ATPase alpha(1) genes in the Milan hypertensive rat                                                | Lodwick D et al.  | 9535139  | Non-human study |



|    |   |                                                                                                                                                   |                         |          |                 |
|----|---|---------------------------------------------------------------------------------------------------------------------------------------------------|-------------------------|----------|-----------------|
| 1  |   |                                                                                                                                                   |                         |          |                 |
| 2  |   |                                                                                                                                                   |                         |          |                 |
| 3  |   |                                                                                                                                                   |                         |          |                 |
| 4  | 1 | Hypertension in unilaterally nephrectomized rats induced by single-kidney transfection with angiotensinogen cDNA                                  | Marley WS et al.        | 10567853 | Non-human study |
| 5  | 1 | Cardiovascular dysfunction in Zucker obese and Zucker diabetic fatty rats: role of hydronephrosis                                                 | Marsh SA et al.         | 17351065 | Non-human study |
| 6  | 1 | A novel rodent model of pregnancy complications associated with genetically determined angiotensin-converting enzyme (ACE) activity               | Mata-Greenwood E et al. | 29360395 | Non-human study |
| 7  | 1 | Chronic hypertension and altered baroreflex responses in transgenic mice containing the human renin and human angiotensinogen genes               | Merrill DC et al.       | 8613528  | Non-human study |
| 8  | 1 | Hypervolemia of pregnancy is not maintained in mice chronically overexpressing angiotensinogen                                                    | Morgan TK et al.        | 16796982 | Non-human study |
| 9  | 1 | Vascular angiotensin-converting enzyme expression regulates local angiotensin II                                                                  | Muller DN et al.        | 9039087  | Non-human study |
| 10 | 1 | Angiotensin-1i Enhances Norepinephrine Spillover During Sympathetic Activation In Conscious Rabbits                                               | Noshiro T et al.        | 8203585  | Non-human study |
| 11 | 1 | Effect Of Angiotensin-Converting Enzyme-Inhibition On Renal Norepinephrine Spillover Rate And Baroreflex Responses In Conscious Rabbits           | Noshiro T et al.        | 1648463  | Non-human study |
| 12 | 1 | Altered regulation of renal interstitial hydrostatic pressure and the renal renin-angiotensin system in the absence of atrial natriuretic peptide | O'Tierney PF et al.     | 18192845 | Non-human study |
| 13 | 1 | Gene Trapping Uncovers Sex-Specific Mechanisms for Upstream Stimulatory Factors 1 and 2 in Angiotensinogen Expression                             | Park S et al.           | 22547438 | Non-human study |
| 14 | 1 | Knockdown of parathyroid hormone related protein in smooth muscle cells alters renal hemodynamics but not blood pressure                          | Raison D et al.         | 23720345 | Non-human study |
| 15 | 1 | Nephron-specific deletion of the prorenin receptor causes a urine concentration defect                                                            | Ramkumar N et al.       | 25995108 | Non-human study |
| 16 | 1 | Alternative splicing of vitamin D-24-hydroxylase: a novel mechanism for the regulation of extrarenal 1,25-dihydroxyvitamin D synthesis.           | Ren S et al.            | 15788398 | Non-human study |
| 17 |   |                                                                                                                                                   |                         |          |                 |
| 18 |   |                                                                                                                                                   |                         |          |                 |
| 19 |   |                                                                                                                                                   |                         |          |                 |
| 20 |   |                                                                                                                                                   |                         |          |                 |
| 21 |   |                                                                                                                                                   |                         |          |                 |
| 22 |   |                                                                                                                                                   |                         |          |                 |
| 23 |   |                                                                                                                                                   |                         |          |                 |
| 24 |   |                                                                                                                                                   |                         |          |                 |
| 25 |   |                                                                                                                                                   |                         |          |                 |
| 26 |   |                                                                                                                                                   |                         |          |                 |
| 27 |   |                                                                                                                                                   |                         |          |                 |
| 28 |   |                                                                                                                                                   |                         |          |                 |
| 29 |   |                                                                                                                                                   |                         |          |                 |
| 30 |   |                                                                                                                                                   |                         |          |                 |
| 31 |   |                                                                                                                                                   |                         |          |                 |
| 32 |   |                                                                                                                                                   |                         |          |                 |
| 33 |   |                                                                                                                                                   |                         |          |                 |
| 34 |   |                                                                                                                                                   |                         |          |                 |
| 35 |   |                                                                                                                                                   |                         |          |                 |
| 36 |   |                                                                                                                                                   |                         |          |                 |
| 37 |   |                                                                                                                                                   |                         |          |                 |
| 38 |   |                                                                                                                                                   |                         |          |                 |
| 39 |   |                                                                                                                                                   |                         |          |                 |
| 40 |   |                                                                                                                                                   |                         |          |                 |
| 41 |   |                                                                                                                                                   |                         |          |                 |
| 42 |   |                                                                                                                                                   |                         |          |                 |
| 43 |   |                                                                                                                                                   |                         |          |                 |
| 44 |   |                                                                                                                                                   |                         |          |                 |
| 45 |   |                                                                                                                                                   |                         |          |                 |
| 46 |   |                                                                                                                                                   |                         |          |                 |

|    |                                                                                                                                                                                                                                                 |                |          |                 |
|----|-------------------------------------------------------------------------------------------------------------------------------------------------------------------------------------------------------------------------------------------------|----------------|----------|-----------------|
| 1  | 20-Hydroxyeicosatetraenoic Acid (HETE)-dependent Hypertension in Human Cytochrome P450 (CYP) 4A11 Transgenic Mice NORMALIZATION OF BLOOD PRESSURE BY SODIUM RESTRICTION, HYDROCHLOROTHIAZIDE, OR BLOCKADE OF THE TYPE 1 ANGIOTENSIN II RECEPTOR | Savas S et al. | 27298316 | Non-human study |
| 2  |                                                                                                                                                                                                                                                 |                |          |                 |
| 3  |                                                                                                                                                                                                                                                 |                |          |                 |
| 4  |                                                                                                                                                                                                                                                 |                |          |                 |
| 5  |                                                                                                                                                                                                                                                 |                |          |                 |
| 6  |                                                                                                                                                                                                                                                 |                |          |                 |
| 7  |                                                                                                                                                                                                                                                 |                |          |                 |
| 8  |                                                                                                                                                                                                                                                 |                |          |                 |
| 9  |                                                                                                                                                                                                                                                 |                |          |                 |
| 10 |                                                                                                                                                                                                                                                 |                |          |                 |
| 11 |                                                                                                                                                                                                                                                 |                |          |                 |
| 12 |                                                                                                                                                                                                                                                 |                |          |                 |
| 13 |                                                                                                                                                                                                                                                 |                |          |                 |
| 14 |                                                                                                                                                                                                                                                 |                |          |                 |
| 15 |                                                                                                                                                                                                                                                 |                |          |                 |
| 16 |                                                                                                                                                                                                                                                 |                |          |                 |
| 17 |                                                                                                                                                                                                                                                 |                |          |                 |
| 18 |                                                                                                                                                                                                                                                 |                |          |                 |
| 19 |                                                                                                                                                                                                                                                 |                |          |                 |
| 20 |                                                                                                                                                                                                                                                 |                |          |                 |
| 21 |                                                                                                                                                                                                                                                 |                |          |                 |
| 22 |                                                                                                                                                                                                                                                 |                |          |                 |
| 23 |                                                                                                                                                                                                                                                 |                |          |                 |
| 24 |                                                                                                                                                                                                                                                 |                |          |                 |
| 25 |                                                                                                                                                                                                                                                 |                |          |                 |
| 26 |                                                                                                                                                                                                                                                 |                |          |                 |
| 27 |                                                                                                                                                                                                                                                 |                |          |                 |
| 28 |                                                                                                                                                                                                                                                 |                |          |                 |
| 29 |                                                                                                                                                                                                                                                 |                |          |                 |
| 30 |                                                                                                                                                                                                                                                 |                |          |                 |
| 31 |                                                                                                                                                                                                                                                 |                |          |                 |
| 32 |                                                                                                                                                                                                                                                 |                |          |                 |
| 33 |                                                                                                                                                                                                                                                 |                |          |                 |
| 34 |                                                                                                                                                                                                                                                 |                |          |                 |
| 35 |                                                                                                                                                                                                                                                 |                |          |                 |
| 36 |                                                                                                                                                                                                                                                 |                |          |                 |
| 37 |                                                                                                                                                                                                                                                 |                |          |                 |
| 38 |                                                                                                                                                                                                                                                 |                |          |                 |
| 39 |                                                                                                                                                                                                                                                 |                |          |                 |
| 40 |                                                                                                                                                                                                                                                 |                |          |                 |
| 41 |                                                                                                                                                                                                                                                 |                |          |                 |
| 42 |                                                                                                                                                                                                                                                 |                |          |                 |
| 43 |                                                                                                                                                                                                                                                 |                |          |                 |
| 44 |                                                                                                                                                                                                                                                 |                |          |                 |
| 45 |                                                                                                                                                                                                                                                 |                |          |                 |
| 46 |                                                                                                                                                                                                                                                 |                |          |                 |

|    |                                                                                                                                                    |               |          |                 |
|----|----------------------------------------------------------------------------------------------------------------------------------------------------|---------------|----------|-----------------|
| 1  | Nebivolol treatment improves resistant arterial function and reduces ventricular hypertrophy and angiotensin II in spontaneously hypertension rats | Wang Y et al. | 23263161 | Non-human study |
| 2  |                                                                                                                                                    |               |          |                 |
| 3  |                                                                                                                                                    |               |          |                 |
| 4  |                                                                                                                                                    |               |          |                 |
| 5  |                                                                                                                                                    |               |          |                 |
| 6  |                                                                                                                                                    |               |          |                 |
| 7  |                                                                                                                                                    |               |          |                 |
| 8  |                                                                                                                                                    |               |          |                 |
| 9  |                                                                                                                                                    |               |          |                 |
| 10 |                                                                                                                                                    |               |          |                 |
| 11 |                                                                                                                                                    |               |          |                 |
| 12 |                                                                                                                                                    |               |          |                 |
| 13 |                                                                                                                                                    |               |          |                 |
| 14 |                                                                                                                                                    |               |          |                 |
| 15 |                                                                                                                                                    |               |          |                 |
| 16 |                                                                                                                                                    |               |          |                 |
| 17 |                                                                                                                                                    |               |          |                 |
| 18 |                                                                                                                                                    |               |          |                 |
| 19 |                                                                                                                                                    |               |          |                 |
| 20 |                                                                                                                                                    |               |          |                 |
| 21 |                                                                                                                                                    |               |          |                 |
| 22 |                                                                                                                                                    |               |          |                 |
| 23 |                                                                                                                                                    |               |          |                 |
| 24 |                                                                                                                                                    |               |          |                 |
| 25 |                                                                                                                                                    |               |          |                 |
| 26 |                                                                                                                                                    |               |          |                 |
| 27 |                                                                                                                                                    |               |          |                 |
| 28 |                                                                                                                                                    |               |          |                 |
| 29 |                                                                                                                                                    |               |          |                 |
| 30 |                                                                                                                                                    |               |          |                 |
| 31 |                                                                                                                                                    |               |          |                 |
| 32 |                                                                                                                                                    |               |          |                 |
| 33 |                                                                                                                                                    |               |          |                 |
| 34 |                                                                                                                                                    |               |          |                 |
| 35 |                                                                                                                                                    |               |          |                 |
| 36 |                                                                                                                                                    |               |          |                 |
| 37 |                                                                                                                                                    |               |          |                 |
| 38 |                                                                                                                                                    |               |          |                 |
| 39 |                                                                                                                                                    |               |          |                 |
| 40 |                                                                                                                                                    |               |          |                 |
| 41 |                                                                                                                                                    |               |          |                 |
| 42 |                                                                                                                                                    |               |          |                 |
| 43 |                                                                                                                                                    |               |          |                 |
| 44 |                                                                                                                                                    |               |          |                 |
| 45 |                                                                                                                                                    |               |          |                 |
| 46 |                                                                                                                                                    |               |          |                 |

|    |                                                                                                  |                                                                                                                                                                           |                      |                          |                          |
|----|--------------------------------------------------------------------------------------------------|---------------------------------------------------------------------------------------------------------------------------------------------------------------------------|----------------------|--------------------------|--------------------------|
| 1  | Angiotensin-converting-enzyme insertion/deletion genotype and long-term renal allograft survival | Beige J et al.                                                                                                                                                            | 9550656              | Not a case-control study |                          |
| 2  |                                                                                                  |                                                                                                                                                                           |                      |                          |                          |
| 3  |                                                                                                  |                                                                                                                                                                           |                      |                          |                          |
| 4  | 1                                                                                                | Angiotensin-converting enzyme genotype and renal allograft survival                                                                                                       | Beige J et al.       | 9259361                  | Not a case-control study |
| 5  |                                                                                                  |                                                                                                                                                                           |                      |                          |                          |
| 6  |                                                                                                  |                                                                                                                                                                           |                      |                          |                          |
| 7  | 1                                                                                                | Deletion insertion polymorphism of the angiotensin converting enzyme gene and progression of diabetic nephropathy                                                         | Bjorck S et al.      | 9269704                  | Not a case-control study |
| 8  |                                                                                                  |                                                                                                                                                                           |                      |                          |                          |
| 9  |                                                                                                  |                                                                                                                                                                           |                      |                          |                          |
| 10 | 1                                                                                                | Angiotensinogen concentrations and renin clearance : implications for blood pressure regulation.                                                                          | Bohlender J et al.   | 10720595                 | Not a case-control study |
| 11 |                                                                                                  |                                                                                                                                                                           |                      |                          |                          |
| 12 |                                                                                                  |                                                                                                                                                                           |                      |                          |                          |
| 13 | 1                                                                                                | Genetic polymorphisms of renin-angiotensin system and progression of interstitial nephritis.                                                                              | Buraczynska M et al. | 12898858                 | Not a case-control study |
| 14 |                                                                                                  |                                                                                                                                                                           |                      |                          |                          |
| 15 | 1                                                                                                | The Epithelial Sodium Channel gamma-Subunit Gene and Blood Pressure Family Based Association, Renal Gene Expression, and Physiological Analyses                           | Busst CJ et al.      | 22006290                 | Not a case-control study |
| 16 |                                                                                                  |                                                                                                                                                                           |                      |                          |                          |
| 17 | 1                                                                                                | Twenty-one additional cases of familial renal glucosuria: absence of genetic heterogeneity, high prevalence of private mutations and further evidence of volume depletion | Calado J et al.      | 18622023                 | Not a case-control study |
| 18 |                                                                                                  |                                                                                                                                                                           |                      |                          |                          |
| 19 |                                                                                                  |                                                                                                                                                                           |                      |                          |                          |
| 20 | 1                                                                                                | Discovery of a novel dominant mutation in the REN gene after forty years of renal disease: a case report                                                                  | Clissold RL et al.   | 28701203                 | Not a case-control study |
| 21 |                                                                                                  |                                                                                                                                                                           |                      |                          |                          |
| 22 |                                                                                                  |                                                                                                                                                                           |                      |                          |                          |
| 23 | 1                                                                                                | Disorders of mineralocorticoid synthesis                                                                                                                                  | Connell JMC et al.   | 11469810                 | Not a case-control study |
| 24 |                                                                                                  |                                                                                                                                                                           |                      |                          |                          |
| 25 | 1                                                                                                | Successful treatment of decompensated chronic viral hepatitis by bursal disease virus vaccine                                                                             | Csatary LK et al.    | 10216467                 | Not a case-control study |
| 26 |                                                                                                  |                                                                                                                                                                           |                      |                          |                          |
| 27 |                                                                                                  |                                                                                                                                                                           |                      |                          |                          |
| 28 | 1                                                                                                | Natriuretic peptides buffer renin-dependent hypertension                                                                                                                  | Demerath T et al.    | 24717731                 | Not a case-control study |
| 29 |                                                                                                  |                                                                                                                                                                           |                      |                          |                          |
| 30 | 1                                                                                                | Association between two genetic polymorphisms of the renin-angiotensin-aldosterone system and diabetic nephropathy: a meta-analysis                                       | Ding W et al.        | 21607620                 | Not a case-control study |
| 31 |                                                                                                  |                                                                                                                                                                           |                      |                          |                          |
| 32 |                                                                                                  |                                                                                                                                                                           |                      |                          |                          |
| 33 | 1                                                                                                | The effects of angiotensin-converting enzyme gene polymorphism on the progression of immunoglobulin A nephropathy in Malaysian patients                                   | Draman CR et al.     | 19037561                 | Not a case-control study |
| 34 |                                                                                                  |                                                                                                                                                                           |                      |                          |                          |
| 35 |                                                                                                  |                                                                                                                                                                           |                      |                          |                          |
| 36 |                                                                                                  |                                                                                                                                                                           |                      |                          |                          |
| 37 |                                                                                                  |                                                                                                                                                                           |                      |                          |                          |
| 38 |                                                                                                  |                                                                                                                                                                           |                      |                          |                          |
| 39 |                                                                                                  |                                                                                                                                                                           |                      |                          |                          |
| 40 |                                                                                                  |                                                                                                                                                                           |                      |                          |                          |
| 41 |                                                                                                  |                                                                                                                                                                           |                      |                          |                          |
| 42 |                                                                                                  |                                                                                                                                                                           |                      |                          |                          |
| 43 |                                                                                                  |                                                                                                                                                                           |                      |                          |                          |
| 44 |                                                                                                  |                                                                                                                                                                           |                      |                          |                          |
| 45 |                                                                                                  |                                                                                                                                                                           |                      |                          |                          |
| 46 |                                                                                                  |                                                                                                                                                                           |                      |                          |                          |

|    |   |                                                                                                                                                                         |                     |                     |                          |
|----|---|-------------------------------------------------------------------------------------------------------------------------------------------------------------------------|---------------------|---------------------|--------------------------|
| 1  | 1 | Juxtaglomerular cell tumor of the kidney: Report of a non-functioning variant                                                                                           | Endoh Y et al.      | 9211527             | Not a case-control study |
| 2  | 1 | Prograf produces more benefits for CYP3A5 low expression patients in early stage after kidney transplantation.                                                          | Fan B et al.        | 28157649            | Not a case-control study |
| 3  | 1 | Diabetes, nephropathy, and the renin system                                                                                                                             | Hollenberg NK       | 16601578            | Not a case-control study |
| 4  | 1 | Association between Angiotensin I-Converting Enzyme Insertion/Deletion Polymorphism and Prognosis of Kidney Transplantation: A Meta-Analysis                            | Huang ZK et al.     | 26000752            | Not a case-control study |
| 5  | 1 | Is there a role of angiotensin-converting enzyme gene polymorphism in the failure of arteriovenous femoral shunts for hemodialysis?                                     | Isbir CS et al.     | 11525534            | Not a case-control study |
| 6  | 1 | Hyperuricemia, Acute and Chronic Kidney Disease, Hypertension, and Cardiovascular Disease: Report of a Scientific Workshop Organized by the National Kidney Foundation  | Johnson RJ et al.   | 29496260            | Not a case-control study |
| 7  | 1 | Diagnosis of a case of Gitelman's syndrome based on renal clearance studies and gene analysis of a novel mutation of the thiazide-sensitive Na-Cl cotransporter         | Kageyama K et al.   | 16370563            | Not a case-control study |
| 8  | 1 | Paricalcitol as an Antiproteinuric Agent Can Result in the Deterioration of Renal and Heart Function in a Patient with Fabry Disease                                    | Keber T et al.      | 28596512            | Not a case-control study |
| 9  | 1 | The role of renin-angiotensin-aldosterone system genes in the progression of chronic kidney disease: findings from the Chronic Renal Insufficiency Cohort (CRIC) study. | Kelly TN et al.     | 25906781            | Not a case-control study |
| 10 | 1 | Smoking has no impact on survival and it is not associated with ACE gene I/D polymorphism in hemodialysis patients.                                                     | Kiss I et al.       | 28058974            | Not a case-control study |
| 11 | 1 | ACE gene polymorphism in focal segmental glomerulosclerosis and membranous glomerulonephritis - Is observed difference of clinical significance?                        | Kuzmanic D et al.   | WOS:000087339600012 | Not a case-control study |
| 12 | 1 | Antihypertensive treatment modulates the association between the D/I ACE gene polymorphism and left ventricular hypertrophy: a meta-analysis                            | Kuznetsova T et al. | 10918550            | Not a case-control study |

|    |   |                                                                                                                              |                    |          |                          |
|----|---|------------------------------------------------------------------------------------------------------------------------------|--------------------|----------|--------------------------|
| 1  | 1 | Bilateral high origins of testicular arteries: a rare variant.                                                               | Li J et al.        | 22732819 | Not a case-control study |
| 2  | 1 | A Genetic Variant in the Distal Enhancer Region of the Human Renin Gene Affects Renin Expression                             | Makino Y et al.    | 26366736 | Not a case-control study |
| 3  | 1 | Genetics and the prediction of complications in type 1 diabetes                                                              | Marre M            | 10097900 | Not a case-control study |
| 4  | 1 | Angiotensin converting enzyme gene polymorphism and renal hemodynamic function in early diabetes                             | Miller JA et al.   | 8995725  | Not a case-control study |
| 5  | 1 | The kidney in diabetes: How to control renal and related cardiovascular complications                                        | Mogensen CE        | 11158852 | Not a case-control study |
| 6  | 1 | A female with X-linked Alport syndrome and compound heterozygous COL4A5 mutations                                            | Mohammad M et al.  | 24337245 | Not a case-control study |
| 7  | 1 | Catalase activity, allelic variations in the catalase gene and risk of kidney complications in patients with type 1 diabetes | Mohammedi K et al. | 24057136 | Not a case-control study |
| 8  | 1 | Renal Tubular Dysgenesis in Israel: Pathologist's Experience and Literature Review                                           | Moldavsky M        | 19344005 | Not a case-control study |
| 9  | 1 | Tip lesion variant of primary focal and segmental glomerulosclerosis: clinicopathological analysis of 20 cases.              | Mungan S et al.    | 25857429 | Not a case-control study |
| 10 | 1 | Genome-Wide Association Analysis of Plasma B-Type Natriuretic Peptide in Blacks The Jackson Heart Study                      | Musani SK et al.   | 25561047 | Not a case-control study |
| 11 | 1 | Angiotensinogen gene variation and renoprotective efficacy of renin-angiotensin system blockade in IgA nephropathy           | Narita I et al.    | 12911556 | Not a case-control study |
| 12 | 1 | Renoprotective efficacy of renin-angiotensin inhibitors in IgA nephropathy is influenced by ACE A2350G polymorphism          | Narita I et al.    | 14684698 | Not a case-control study |
| 13 | 1 | Correlates of ACE activity in macroalbuminuric type 2 diabetic patients treated with chronic ACE inhibition.                 | Nikzamid et al.    | 17986476 | Not a case-control study |
| 14 | 1 | Epidemiology and genetics of calcific aortic valve disease                                                                   | O'Brien KD         | 17963677 | Not a case-control study |

|    |                                                                                                    |                                                                                                                                                                                                                               |                           |                          |                          |
|----|----------------------------------------------------------------------------------------------------|-------------------------------------------------------------------------------------------------------------------------------------------------------------------------------------------------------------------------------|---------------------------|--------------------------|--------------------------|
| 1  | Impact of polymorphisms in the renin-angiotensin-aldosterone system on hypertrophic cardiomyopathy | Orenes-Pinero E et al.                                                                                                                                                                                                        | 21507890                  | Not a case-control study |                          |
| 2  |                                                                                                    |                                                                                                                                                                                                                               |                           |                          |                          |
| 3  |                                                                                                    |                                                                                                                                                                                                                               |                           |                          |                          |
| 4  | 1                                                                                                  | Relationships between HLA-A, -B, -DQ and -DR antigens and interstitial fibrosis in renal allografts.                                                                                                                          | Ozdemir BH et al.         | 15354972                 | Not a case-control study |
| 5  |                                                                                                    |                                                                                                                                                                                                                               |                           |                          |                          |
| 6  | 1                                                                                                  | Renin-angiotensin system gene polymorphisms predict the progression to renal insufficiency among Asians with lupus nephritis                                                                                                  | Parsa A et al.            | 15789057                 | Not a case-control study |
| 7  |                                                                                                    |                                                                                                                                                                                                                               |                           |                          |                          |
| 8  | 1                                                                                                  | Association of angiotensinogen gene T235 variant with progression of immunoglobulin A nephropathy in Caucasian patients                                                                                                       | Pei Y et al.              | 9259580                  | Not a case-control study |
| 9  |                                                                                                    |                                                                                                                                                                                                                               |                           |                          |                          |
| 10 | 1                                                                                                  | Normative genetic profiles of RAAS pathway gene Polymorphisms in north Indian and south Indian Populations                                                                                                                    | Prasad P et al.           | 18027817                 | Not a case-control study |
| 11 |                                                                                                    |                                                                                                                                                                                                                               |                           |                          |                          |
| 12 | 1                                                                                                  | Identification of a novel mutation in the human mineralocorticoid receptor gene in a German family with autosomal-dominant pseudohypoaldosteronism type 1: Further evidence for marked interindividual clinical heterogeneity | Riepe FG et al.           | 12679457                 | Not a case-control study |
| 13 |                                                                                                    |                                                                                                                                                                                                                               |                           |                          |                          |
| 14 | 1                                                                                                  | Genetics of diabetic nephropathy                                                                                                                                                                                              | Rippin JD et al.          | 11554775                 | Not a case-control study |
| 15 |                                                                                                    |                                                                                                                                                                                                                               |                           |                          |                          |
| 16 | 1                                                                                                  | A Synergistic Association of ACE I/D and eNOS G894T Gene Variants with the Progression of Immunoglobulin A Nephropathy - A Pilot Study                                                                                        | Rodriguez-Perez JC et al. | 19546528                 | Not a case-control study |
| 17 |                                                                                                    |                                                                                                                                                                                                                               |                           |                          |                          |
| 18 | 1                                                                                                  | Increased left ventricular mass in normotensive type 1 diabetic patients with diabetic nephropathy                                                                                                                            | Sato A et al.             | 9727905                  | Not a case-control study |
| 19 |                                                                                                    |                                                                                                                                                                                                                               |                           |                          |                          |
| 20 | 1                                                                                                  | Risk of developing diabetic nephropathy is not associated with synergism between the angiotensin II (type 1) receptor C-1166 allele and poor glycaemic control                                                                | Savage DA et al.          | 10328465                 | Not a case-control study |
| 21 |                                                                                                    |                                                                                                                                                                                                                               |                           |                          |                          |
| 22 | 1                                                                                                  | Alport Syndrome in Women and Girls                                                                                                                                                                                            | Savige J et al.           | 27287265                 | Not a case-control study |
| 23 |                                                                                                    |                                                                                                                                                                                                                               |                           |                          |                          |
| 24 | 1                                                                                                  | Expert Guidelines for the Management of Alport Syndrome and Thin Basement Membrane Nephropathy                                                                                                                                | Savige J et al.           | 23349312                 | Not a case-control study |
| 25 |                                                                                                    |                                                                                                                                                                                                                               |                           |                          |                          |
| 26 | 1                                                                                                  | Genetic determinants of diabetic renal disease and their impact on therapeutic interventions                                                                                                                                  | Schmidt S et al.          | 9407416                  | Not a case-control study |
| 27 |                                                                                                    |                                                                                                                                                                                                                               |                           |                          |                          |
| 28 |                                                                                                    |                                                                                                                                                                                                                               |                           |                          |                          |
| 29 |                                                                                                    |                                                                                                                                                                                                                               |                           |                          |                          |
| 30 |                                                                                                    |                                                                                                                                                                                                                               |                           |                          |                          |
| 31 |                                                                                                    |                                                                                                                                                                                                                               |                           |                          |                          |
| 32 |                                                                                                    |                                                                                                                                                                                                                               |                           |                          |                          |
| 33 |                                                                                                    |                                                                                                                                                                                                                               |                           |                          |                          |
| 34 |                                                                                                    |                                                                                                                                                                                                                               |                           |                          |                          |
| 35 |                                                                                                    |                                                                                                                                                                                                                               |                           |                          |                          |
| 36 |                                                                                                    |                                                                                                                                                                                                                               |                           |                          |                          |
| 37 |                                                                                                    |                                                                                                                                                                                                                               |                           |                          |                          |
| 38 |                                                                                                    |                                                                                                                                                                                                                               |                           |                          |                          |
| 39 |                                                                                                    |                                                                                                                                                                                                                               |                           |                          |                          |
| 40 |                                                                                                    |                                                                                                                                                                                                                               |                           |                          |                          |
| 41 |                                                                                                    |                                                                                                                                                                                                                               |                           |                          |                          |
| 42 |                                                                                                    |                                                                                                                                                                                                                               |                           |                          |                          |
| 43 |                                                                                                    |                                                                                                                                                                                                                               |                           |                          |                          |
| 44 |                                                                                                    |                                                                                                                                                                                                                               |                           |                          |                          |
| 45 |                                                                                                    |                                                                                                                                                                                                                               |                           |                          |                          |
| 46 |                                                                                                    |                                                                                                                                                                                                                               |                           |                          |                          |

|   |                                                                                                                                                       |                            |          |                          |
|---|-------------------------------------------------------------------------------------------------------------------------------------------------------|----------------------------|----------|--------------------------|
| 1 | Rho kinase polymorphism influences blood pressure and systemic vascular resistance in human twins - Role of heredity                                  | Seasholtz TM et al.        | 16585408 | Not a case-control study |
| 1 | Impact of genetic polymorphisms of the renin-angiotensin system and of non-genetic factors on kidney transplant function - a single-center experience | Siekierka-Harreis M et al. | 19681973 | Not a case-control study |
| 1 | The deletion/insertion polymorphism of the angiotensin converting enzyme gene and cardiovascular-renal risk                                           | Staessen JA et al.         | 9488209  | Not a case-control study |
| 1 | Renal angiomyolipoma - Further immunophenotypic characterization of an expanding morphologic spectrum                                                 | Stone CH et al.            | 11371226 | Not a case-control study |
| 1 | Frequencies of apolipoprotein E alleles in depressed patients undergoing hemodialysis--a case-control study.                                          | Su YY et al.               | 25707516 | Not a case-control study |
| 1 | Assessing genetic susceptibility to diabetic nephropathy                                                                                              | Tanaka N et al.            | 16174281 | Not a case-control study |
| 1 | Tip variant of focal segmental glomerulosclerosis: is it truly a benign variant?                                                                      | Trivedi M et al.           | 25721429 | Not a case-control study |
| 1 | Roles of Loss of Chromosome 14q Allele in the Prognosis of Renal Cell Carcinoma with C-reactive Protein Abnormality.                                  | Wang G et al.              | 28875953 | Not a case-control study |
| 1 | Contribution of gene polymorphisms in the renin-angiotensin system to macroangiopathy in patients with diabetic nephropathy                           | Wong et al.                | 11431175 | Not a case-control study |
| 1 | Prognostic role of serum ACE activity on outcome of type 2 diabetic patients on chronic ambulatory peritoneal dialysis                                | Wong TYH et al.            | 11979350 | Not a case-control study |
| 1 | Novel mutations in the inverted formin 2 gene of Chinese families contribute to focal segmental glomerulosclerosis.                                   | Xie J et al.               | 26039629 | Not a case-control study |
| 1 | Role Of The Deletion Polymorphism Of The Angiotensin-Converting Enzyme Gene In The Progression And Therapeutic Responsiveness Of Iga Nephropathy      | Yoshida H et al.           | 7593601  | Not a case-control study |
| 1 | Gene Polymorphisms of the Renin-AngiotensinAldosterone system and angiotensin 11 type I-Receptor activating antibodies in renal rejection             | Zhang G et al.             | 17984617 | Not a case-control study |



|    |                                                                                                                                                                          |                                                                                                                                                                                                                                                         |                      |                          |                           |
|----|--------------------------------------------------------------------------------------------------------------------------------------------------------------------------|---------------------------------------------------------------------------------------------------------------------------------------------------------------------------------------------------------------------------------------------------------|----------------------|--------------------------|---------------------------|
| 1  | Rapid detection and quantification of apolipoprotein L1 genetic variants and total levels in plasma by ultra-performance liquid chromatography/tandem mass spectrometry. | Zhou H et al.                                                                                                                                                                                                                                           | 24591025             | Not a case-control study |                           |
| 2  |                                                                                                                                                                          |                                                                                                                                                                                                                                                         |                      |                          |                           |
| 3  |                                                                                                                                                                          |                                                                                                                                                                                                                                                         |                      |                          |                           |
| 4  |                                                                                                                                                                          |                                                                                                                                                                                                                                                         |                      |                          |                           |
| 5  |                                                                                                                                                                          |                                                                                                                                                                                                                                                         |                      |                          |                           |
| 6  | 1                                                                                                                                                                        | Pharmacogenetic association of the angiotensin-converting enzyme insertion/deletion polymorphism on blood pressure and cardiovascular risk in relation to antihypertensive treatment - The genetics of hypertension-associated treatment (GenHAT) study | Arnett DK et al.     | 15967849                 | Not a renal disease focus |
| 7  |                                                                                                                                                                          |                                                                                                                                                                                                                                                         |                      |                          |                           |
| 8  |                                                                                                                                                                          |                                                                                                                                                                                                                                                         |                      |                          |                           |
| 9  |                                                                                                                                                                          |                                                                                                                                                                                                                                                         |                      |                          |                           |
| 10 | 1                                                                                                                                                                        | A role for CETP TaqIB polymorphism in determining susceptibility to atrial fibrillation: a nested case control study                                                                                                                                    | Asselbergs FW et al. | 16623947                 | Not a renal disease focus |
| 11 |                                                                                                                                                                          |                                                                                                                                                                                                                                                         |                      |                          |                           |
| 12 |                                                                                                                                                                          |                                                                                                                                                                                                                                                         |                      |                          |                           |
| 13 | 1                                                                                                                                                                        | Serum paraoxonase-1 gene polymorphism and enzyme activity in patients with urolithiasis.                                                                                                                                                                | Atar A et al.        | 26795139                 | Not a renal disease focus |
| 14 |                                                                                                                                                                          |                                                                                                                                                                                                                                                         |                      |                          |                           |
| 15 | 1                                                                                                                                                                        | Association of ACE gene D polymorphism with left ventricular hypertrophy in patients with diastolic heart failure: a case-control study                                                                                                                 | Bahramali E et al.   | 26861937                 | Not a renal disease focus |
| 16 |                                                                                                                                                                          |                                                                                                                                                                                                                                                         |                      |                          |                           |
| 17 | 1                                                                                                                                                                        | Amiloride, a specific drug for hypertension in black people with T594M variant?                                                                                                                                                                         | Baker EH et al.      | 12105131                 | Not a renal disease focus |
| 18 |                                                                                                                                                                          |                                                                                                                                                                                                                                                         |                      |                          |                           |
| 19 | 1                                                                                                                                                                        | Association of hypertension with T594M mutation in beta subunit of epithelial sodium channels in black people resident in London                                                                                                                        | Baker EH et al.      | 9593408                  | Not a renal disease focus |
| 20 |                                                                                                                                                                          |                                                                                                                                                                                                                                                         |                      |                          |                           |
| 21 | 1                                                                                                                                                                        | Alpha-adducin polymorphism in hypertensives of South African ancestry.                                                                                                                                                                                  | Barlassina C et al.  | 10912759                 | Not a renal disease focus |
| 22 |                                                                                                                                                                          |                                                                                                                                                                                                                                                         |                      |                          |                           |
| 23 | 1                                                                                                                                                                        | Common genetic variants and haplotypes in renal CLCNKA gene are associated to salt-sensitive hypertension                                                                                                                                               | Barlassina C et al.  | 17510212                 | Not a renal disease focus |
| 24 |                                                                                                                                                                          |                                                                                                                                                                                                                                                         |                      |                          |                           |
| 25 | 1                                                                                                                                                                        | Synergistic effect of alpha-adducin and ACE genes causes blood pressure changes with body sodium and volume expansion                                                                                                                                   | Barlassina C et al.  | 10720960                 | Not a renal disease focus |
| 26 |                                                                                                                                                                          |                                                                                                                                                                                                                                                         |                      |                          |                           |
| 27 | 1                                                                                                                                                                        | Evaluation of risk factors for the development of nephropathy in patients with IDDM: Insertion/deletion angiotensin converting enzyme gene polymorphism, hypertension and metabolic control                                                             | Barnas U et al.      | 9084972                  | Not a renal disease focus |
| 28 |                                                                                                                                                                          |                                                                                                                                                                                                                                                         |                      |                          |                           |
| 29 | 1                                                                                                                                                                        | Polymorphism in angiotensin II receptor genes and hypertension                                                                                                                                                                                          | Baudin B et al.      | 15640279                 | Not a renal disease focus |
| 30 |                                                                                                                                                                          |                                                                                                                                                                                                                                                         |                      |                          |                           |
| 31 | 1                                                                                                                                                                        | Higher thrombin activatable fibrinolysis inhibitor levels are associated with inflammation in attack-free familial Mediterranean fever patients.                                                                                                        | Bavbek N et al.      | 24580410                 | Not a renal disease focus |
| 32 |                                                                                                                                                                          |                                                                                                                                                                                                                                                         |                      |                          |                           |
| 33 |                                                                                                                                                                          |                                                                                                                                                                                                                                                         |                      |                          |                           |
| 34 |                                                                                                                                                                          |                                                                                                                                                                                                                                                         |                      |                          |                           |
| 35 |                                                                                                                                                                          |                                                                                                                                                                                                                                                         |                      |                          |                           |
| 36 |                                                                                                                                                                          |                                                                                                                                                                                                                                                         |                      |                          |                           |
| 37 |                                                                                                                                                                          |                                                                                                                                                                                                                                                         |                      |                          |                           |
| 38 |                                                                                                                                                                          |                                                                                                                                                                                                                                                         |                      |                          |                           |
| 39 |                                                                                                                                                                          |                                                                                                                                                                                                                                                         |                      |                          |                           |
| 40 |                                                                                                                                                                          |                                                                                                                                                                                                                                                         |                      |                          |                           |
| 41 |                                                                                                                                                                          |                                                                                                                                                                                                                                                         |                      |                          |                           |
| 42 |                                                                                                                                                                          |                                                                                                                                                                                                                                                         |                      |                          |                           |
| 43 |                                                                                                                                                                          |                                                                                                                                                                                                                                                         |                      |                          |                           |
| 44 |                                                                                                                                                                          |                                                                                                                                                                                                                                                         |                      |                          |                           |
| 45 |                                                                                                                                                                          |                                                                                                                                                                                                                                                         |                      |                          |                           |
| 46 |                                                                                                                                                                          |                                                                                                                                                                                                                                                         |                      |                          |                           |

|    |                                                                                                                               |                                                                                                                                                                                |                      |                           |                           |
|----|-------------------------------------------------------------------------------------------------------------------------------|--------------------------------------------------------------------------------------------------------------------------------------------------------------------------------|----------------------|---------------------------|---------------------------|
| 1  | Insertion-deletion polymorphism in the angiotensin-converting enzyme (ACE) gene among Sudanese, Somalis, Emiratis, and Omanis | Bayoumi RA et al.                                                                                                                                                              | 16900885             | Not a renal disease focus |                           |
| 2  |                                                                                                                               |                                                                                                                                                                                |                      |                           |                           |
| 3  |                                                                                                                               |                                                                                                                                                                                |                      |                           |                           |
| 4  | 1                                                                                                                             | Single Strand Conformation Polymorphism (SSCP) as a quick and reliable method to genotype M235T polymorphism of angiotensinogen gene                                           | Bettinaglio P et al. | 12270765                  | Not a renal disease focus |
| 5  |                                                                                                                               |                                                                                                                                                                                |                      |                           |                           |
| 6  | 1                                                                                                                             | CYP3A5 and ABCB1 genes and hypertension                                                                                                                                        | Bochud M et al.      | 19290795                  | Not a renal disease focus |
| 7  |                                                                                                                               |                                                                                                                                                                                |                      |                           |                           |
| 8  | 1                                                                                                                             | Polymorphisms of the renin-angiotensin system in patients with multifocal renal arterial fibromuscular dysplasia                                                               | Bofinger A et al.    | 11317203                  | Not a renal disease focus |
| 9  |                                                                                                                               |                                                                                                                                                                                |                      |                           |                           |
| 10 | 1                                                                                                                             | Association between plasma activities of semicarbazide-sensitive amine oxidase and angiotensin-converting enzyme in patients with type 1 diabetes mellitus.                    | Boomsma F et al.     | 15830186                  | Not a renal disease focus |
| 11 |                                                                                                                               |                                                                                                                                                                                |                      |                           |                           |
| 12 | 1                                                                                                                             | Structure-Based Analysis of Single Nucleotide Variants in the Renin-Angiotensinogen Complex                                                                                    | Brown DK et al.      | 28302554                  | Not a renal disease focus |
| 13 |                                                                                                                               |                                                                                                                                                                                |                      |                           |                           |
| 14 | 1                                                                                                                             | Renin-angiotensin system gene polymorphisms: assessment of the risk of coronary heart disease.                                                                                 | Buraczynska M et al. | 14502296                  | Not a renal disease focus |
| 15 |                                                                                                                               |                                                                                                                                                                                |                      |                           |                           |
| 16 | 1                                                                                                                             | Oxidative stress-related factors in Bartter's and Gitelman's syndromes: relevance for angiotensin II signalling.                                                               | Calo LA et al.       | 12897089                  | Not a renal disease focus |
| 17 |                                                                                                                               |                                                                                                                                                                                |                      |                           |                           |
| 18 | 1                                                                                                                             | Efficacy of large doses of IL-2-activated human leukocyte antigen haploidentical peripheral blood stem cells on refractory metastatic renal cell carcinoma.                    | Cao S et al.         | 21812652                  | Not a renal disease focus |
| 19 |                                                                                                                               |                                                                                                                                                                                |                      |                           |                           |
| 20 | 1                                                                                                                             | Biochemical and genetic characterization of 11 beta-hydroxysteroid dehydrogenase type 2 in low-renin essential hypertensives.                                                  | Carvajal CA et al.   | 15643127                  | Not a renal disease focus |
| 21 |                                                                                                                               |                                                                                                                                                                                |                      |                           |                           |
| 22 | 1                                                                                                                             | Role of GRK4 in the Regulation of Arterial AT(1) Receptor in Hypertension                                                                                                      | Chen K et al.        | 24218433                  | Not a renal disease focus |
| 23 |                                                                                                                               |                                                                                                                                                                                |                      |                           |                           |
| 24 | 1                                                                                                                             | CARD8 rs2043211 polymorphism is associated with gout in a Chinese male population.                                                                                             | Chen Y et al.        | 25790751                  | Not a renal disease focus |
| 25 |                                                                                                                               |                                                                                                                                                                                |                      |                           |                           |
| 26 | 1                                                                                                                             | Association of renin-angiotensin and endothelial nitric oxide synthase gene polymorphisms with blood pressure progression and incident hypertension: prospective cohort study. | Conen D et al.       | 18698212                  | Not a renal disease focus |
| 27 |                                                                                                                               |                                                                                                                                                                                |                      |                           |                           |
| 28 | 1                                                                                                                             | Role of ACE inhibitors in patients with diabetes mellitus                                                                                                                      | Cordonnier DJ et al. | 11708761                  | Not a renal disease focus |
| 29 |                                                                                                                               |                                                                                                                                                                                |                      |                           |                           |
| 30 |                                                                                                                               |                                                                                                                                                                                |                      |                           |                           |
| 31 |                                                                                                                               |                                                                                                                                                                                |                      |                           |                           |
| 32 |                                                                                                                               |                                                                                                                                                                                |                      |                           |                           |
| 33 |                                                                                                                               |                                                                                                                                                                                |                      |                           |                           |
| 34 |                                                                                                                               |                                                                                                                                                                                |                      |                           |                           |
| 35 |                                                                                                                               |                                                                                                                                                                                |                      |                           |                           |
| 36 |                                                                                                                               |                                                                                                                                                                                |                      |                           |                           |
| 37 |                                                                                                                               |                                                                                                                                                                                |                      |                           |                           |
| 38 |                                                                                                                               |                                                                                                                                                                                |                      |                           |                           |
| 39 |                                                                                                                               |                                                                                                                                                                                |                      |                           |                           |
| 40 |                                                                                                                               |                                                                                                                                                                                |                      |                           |                           |
| 41 |                                                                                                                               |                                                                                                                                                                                |                      |                           |                           |
| 42 |                                                                                                                               |                                                                                                                                                                                |                      |                           |                           |
| 43 |                                                                                                                               |                                                                                                                                                                                |                      |                           |                           |
| 44 |                                                                                                                               |                                                                                                                                                                                |                      |                           |                           |
| 45 |                                                                                                                               |                                                                                                                                                                                |                      |                           |                           |
| 46 |                                                                                                                               |                                                                                                                                                                                |                      |                           |                           |

|    |   |                                                                                                                                                                                              |                      |          |                           |
|----|---|----------------------------------------------------------------------------------------------------------------------------------------------------------------------------------------------|----------------------|----------|---------------------------|
| 1  | 1 | Molecular genetics of the renin-angiotensin-aldosterone system in human hypertension                                                                                                         | Corvol P et al.      | 9296068  | Not a renal disease focus |
| 2  | 1 | Vitamin D receptor gene polymorphisms and plasma renin activity in essential hypertensive individuals.                                                                                       | Cottone S et al.     | 25500899 | Not a renal disease focus |
| 3  | 1 | Genetic polymorphism of Na-K cotransport in essential hypertension.                                                                                                                          | Cusi D et al.        | 2258861  | Not a renal disease focus |
| 4  | 1 | Extensive personal experience - Examination of genotype and phenotype relationships in 14 patients with apparent mineralocorticoid excess                                                    | Dave-Sharma S et al. | 9661590  | Not a renal disease focus |
| 5  | 1 | ACE and PC-1 gene polymorphisms in normoalbuminuric Type 1 diabetic patients - A 10-year prospective study                                                                                   | de Azevedo MJ et al. | 12126783 | Not a renal disease focus |
| 6  | 1 | Polymorphisms in genes of the renin-angiotensin-aldosterone system and renal cell cancer risk: Interplay with hypertension and intakes of sodium, potassium and fluid                        | Deckers IA et al.    | 24978482 | Not a renal disease focus |
| 7  | 1 | Adsorption of cytotoxic anti-HLA antibodies with HLA class I immunosorbant beads.                                                                                                            | DeVito LD et al.     | 2186524  | Not a renal disease focus |
| 8  | 1 | Clinical and laboratory characterization of 114 cases of Castleman disease patients from a single centre: paraneoplastic pemphigus is an unfavourable prognostic factor.                     | Dong Y et al.        | 25824806 | Not a renal disease focus |
| 9  | 1 | CYP2C9 genotype modifies activity of the renin-angiotensin-aldosterone system in hypertensive men                                                                                            | Donner KM et al.     | 19593208 | Not a renal disease focus |
| 10 | 1 | TGF-beta1 gene polymorphisms and peritoneal equilibration test results in CAPD patients.                                                                                                     | Ebinc FA et al.      | 18197538 | Not a renal disease focus |
| 11 | 1 | A new theory of essential hypertension based on analysis of the association between a polymorphism of the alpha(2)-adrenoceptor at the 10q24-q26 locus and hypertension in African-Americans | Eggers AE            | 26243176 | Not a renal disease focus |
| 12 | 1 | High aldosterone-to-renin variants of CYP11B2 and pregnancy outcome.                                                                                                                         | Escher G et al.      | 19151144 | Not a renal disease focus |
| 13 | 1 | Cardiovascular effects of aldosterone: insight from adult carriers of mineralocorticoid receptor mutations.                                                                                  | Escoubet B et al.    | 23852419 | Not a renal disease focus |

|   |                                                                                                                                                                                           |                          |          |                           |
|---|-------------------------------------------------------------------------------------------------------------------------------------------------------------------------------------------|--------------------------|----------|---------------------------|
| 1 | Genetic polymorphisms of the renin-angiotensin-aldosterone system and renal insufficiency in essential hypertension                                                                       | Fabris B et al.          | 15662219 | Not a renal disease focus |
| 1 | Recurrence of the R947X mutation in unrelated families with autosomal dominant pseudohypoaldosteronism type 1: evidence for a mutational hot spot in the mineralocorticoid receptor gene. | Fernandes-Rosa FL et al. | 16757525 | Not a renal disease focus |
| 1 | Angiotensin converting enzyme gene I/D polymorphism in essential hypertension and nephroangiosclerosis                                                                                    | Fernandez-Llama P et al. | 9607207  | Not a renal disease focus |
| 1 | Renin-Angiotensin System Polymorphisms and Risk of Hypertension: Influence of Environmental Factors                                                                                       | Forman JP et al.         | 18550936 | Not a renal disease focus |
| 1 | CYP3A5 genotype is associated with elevated blood pressure.                                                                                                                               | Fromm MF et al.          | 16141800 | Not a renal disease focus |
| 1 | Associations between the human insulin gene 5' VNTR and clinical variables of the renin-angiotensin system.                                                                               | Frossard PM et al.       | 14647005 | Not a renal disease focus |
| 1 | The interaction of AGT and NOS3 gene polymorphisms with conventional risk factors increases predisposition to hypertension                                                                | Gatti RR et al.          | 22791701 | Not a renal disease focus |
| 1 | Connexin 43 is not essential for the control of renin synthesis and secretion                                                                                                             | Gerl M et al.            | 24062052 | Not a renal disease focus |
| 1 | Deletion polymorphism of the angiotensin-converting enzyme gene is independently associated with left ventricular mass and geometric remodeling in systemic hypertension.                 | Gharavi AG et al.        | 8677872  | Not a renal disease focus |
| 1 | A Computational Model of the Circulating Renin-Angiotensin System and Blood Pressure Regulation                                                                                           | Guillaud F et al.        | 20683640 | Not a renal disease focus |
| 1 | The presence of PAI-1 4G/5G and ACE DD genotypes increases the risk of early-stage AVF thrombosis in hemodialysis patients.                                                               | Gungor Y et al.          | 21332339 | Not a renal disease focus |
| 1 | ADAM33: a newly identified gene in the pathogenesis of asthma.                                                                                                                            | Holgate ST et al.        | 16257631 | Not a renal disease focus |
| 1 | Nonmodulation and essential hypertension                                                                                                                                                  | Hollenberg NK et al.     | 16672145 | Not a renal disease focus |

|    |   |                                                                                                                                                                                   |                     |          |                           |
|----|---|-----------------------------------------------------------------------------------------------------------------------------------------------------------------------------------|---------------------|----------|---------------------------|
| 1  | 1 | Angiotensinogen genotype affects renal and adrenal responses to angiotensin II in essential hypertension                                                                          | Hopkins PN et al.   | 11997278 | Not a renal disease focus |
| 2  | 1 | Blunted renal vascular response to angiotensin II is associated with a common Variant of the angiotensinogen gene and obesity                                                     | Hopkins PN et al.   | 8728297  | Not a renal disease focus |
| 3  | 1 | Genetic variation of the renin-angiotensin system and chronic kidney disease progression in black individuals in the atherosclerosis risk in communities study                    | Hsu CCC et al.      | 16396964 | Not a renal disease focus |
| 4  | 1 | Unclassified renal cell carcinoma: a clinicopathological, comparative genomic hybridization, and whole-genome exon sequencing study.                                              | Hu ZY et al.        | 25120763 | Not a renal disease focus |
| 5  | 1 | A case control association study of ACE gene polymorphism (I/D) with hypertension in Punjabi population from Faisalabad, Pakistan                                                 | Hussain M et al.    | 29058472 | Not a renal disease focus |
| 6  | 1 | Genetic variant of the renin-angiotensin system and prevalence of type 2 diabetes mellitus: a modest but significant effect of aldosterone synthase                               | Ichikawa M et al.   | 24549414 | Not a renal disease focus |
| 7  | 1 | The cardiovascular system in familial hypocalciuric hypercalcemia: a cross-sectional study on physiological effects of inactivating variants in the calcium-sensing receptor gene | Jakobsen NFB et al. | 27418061 | Not a renal disease focus |
| 8  | 1 | Genetic variants in five novel loci including CFB and CD40 predispose to chronic hepatitis B.                                                                                     | Jiang DK et al.     | 25802187 | Not a renal disease focus |
| 9  | 1 | The association of the R563Q genotype of the ENaC with phenotypic variation in Southern Africa.                                                                                   | Jones ES et al.     | 22895453 | Not a renal disease focus |
| 10 | 1 | Renin-Angiotensin System Gene Variants and Type 2 Diabetes Mellitus: Influence of Angiotensinogen                                                                                 | Joyce-Tan SM et al. | 26682227 | Not a renal disease focus |
| 11 | 1 | Comprehensive analysis of the renin-angiotensin gene polymorphisms with relation to hypertension in the Japanese                                                                  | Kato N et al.       | 10953993 | Not a renal disease focus |
| 12 | 1 | Genetic-Control Of Blood-Pressure And The Angiotensinogen Locus                                                                                                                   | Kim HS et al.       | 7708716  | Not a renal disease focus |
| 13 | 1 | Effect of the plasminogen-plasmin system on hypertensive renal and cardiac damage                                                                                                 | Knier B et al.      | 21610512 | Not a renal disease focus |

|    |                                                                                                                                                                                                      |                    |          |                           |
|----|------------------------------------------------------------------------------------------------------------------------------------------------------------------------------------------------------|--------------------|----------|---------------------------|
| 1  | Polymorphism of the aldosterone synthase gene is not associated with progression of diabetic nephropathy, but associated with hypertension in type 2 diabetic patients                               | Ko GJ et al.       | 18771471 | Not a renal disease focus |
| 2  |                                                                                                                                                                                                      |                    |          |                           |
| 3  |                                                                                                                                                                                                      |                    |          |                           |
| 4  |                                                                                                                                                                                                      |                    |          |                           |
| 5  |                                                                                                                                                                                                      |                    |          |                           |
| 6  |                                                                                                                                                                                                      |                    |          |                           |
| 7  | 1 Haplotype-based case-control study revealing an association between the adrenomedullin gene and proteinuria in subjects with essential hypertension                                                | Kobayashi Y et al. | 16097366 | Not a renal disease focus |
| 8  |                                                                                                                                                                                                      |                    |          |                           |
| 9  |                                                                                                                                                                                                      |                    |          |                           |
| 10 | 1 Lys(173)Arg and -344T/C variants of CYP11B2 in Japanese patients with low-renin hypertension.                                                                                                      | Komiya I et al.    | 10720581 | Not a renal disease focus |
| 11 |                                                                                                                                                                                                      |                    |          |                           |
| 12 |                                                                                                                                                                                                      |                    |          |                           |
| 13 | 1 Molecular-Biology Of Hypertension                                                                                                                                                                  | Krieger JE et al.  | 1832415  | Not a renal disease focus |
| 14 |                                                                                                                                                                                                      |                    |          |                           |
| 15 | 1 Beneficial role of D allele in controlling ACE levels: a study among Brahmins of north India                                                                                                       | Kumari S et al.    | 27350671 | Not a renal disease focus |
| 16 |                                                                                                                                                                                                      |                    |          |                           |
| 17 | 1 Juxtaglomerular cell tumor: A morphological, immunohistochemical and genetic study of six cases                                                                                                    | Kuroda N et al.    | 22939575 | Not a renal disease focus |
| 18 |                                                                                                                                                                                                      |                    |          |                           |
| 19 |                                                                                                                                                                                                      |                    |          |                           |
| 20 | 1 Angiotensin-converting enzyme gene polymorphism has no influence on the circulating renin-angiotensin-aldosterone system or blood pressure in normotensive subjects                                | Lachurie ML et al. | 7796503  | Not a renal disease focus |
| 21 |                                                                                                                                                                                                      |                    |          |                           |
| 22 |                                                                                                                                                                                                      |                    |          |                           |
| 23 | 1 Angiotensinogen and angiotensin II type 1 receptor gene polymorphism in patients with autosomal dominant polycystic kidney disease: Effect on hypertension and ESRD                                | Lee KB et al.      | 12950120 | Not a renal disease focus |
| 24 |                                                                                                                                                                                                      |                    |          |                           |
| 25 |                                                                                                                                                                                                      |                    |          |                           |
| 26 | 1 ACE gene insertion/deletion polymorphism associated with 1998 World Health Organization definition of metabolic syndrome in Chinese type 2 diabetic patients                                       | Lee YJ et al.      | 12032106 | Not a renal disease focus |
| 27 |                                                                                                                                                                                                      |                    |          |                           |
| 28 |                                                                                                                                                                                                      |                    |          |                           |
| 29 | 1 The brain and salt-sensitive hypertension                                                                                                                                                          | Leenen FHH et al.  | 11884268 | Not a renal disease focus |
| 30 |                                                                                                                                                                                                      |                    |          |                           |
| 31 |                                                                                                                                                                                                      |                    |          |                           |
| 32 | 1 Risk given by AGT polymorphisms in inducing susceptibility to essential hypertension among isolated populations from a remote region of China: A case-control study among the isolated populations | Li Q et al.        | 26391364 | Not a renal disease focus |
| 33 |                                                                                                                                                                                                      |                    |          |                           |
| 34 |                                                                                                                                                                                                      |                    |          |                           |
| 35 | 1 Association Between Polymorphisms of ADRBK1 Gene and Plasma Renin Activity in Hypertensive Patients: A Case-Control Study                                                                          | Li Y et al.        | 27555048 | Not a renal disease focus |
| 36 |                                                                                                                                                                                                      |                    |          |                           |
| 37 |                                                                                                                                                                                                      |                    |          |                           |
| 38 | 1 No Evidence for the Expression of Renin-Angiotensin-Aldosterone System in Otosclerotic Stapes Footplates                                                                                           | Liktor B et al.    | 23370555 | Not a renal disease focus |
| 39 |                                                                                                                                                                                                      |                    |          |                           |
| 40 |                                                                                                                                                                                                      |                    |          |                           |
| 41 |                                                                                                                                                                                                      |                    |          |                           |
| 42 |                                                                                                                                                                                                      |                    |          |                           |
| 43 |                                                                                                                                                                                                      |                    |          |                           |
| 44 |                                                                                                                                                                                                      |                    |          |                           |
| 45 |                                                                                                                                                                                                      |                    |          |                           |
| 46 |                                                                                                                                                                                                      |                    |          |                           |

|    |                                                                                               |                                                                                                                                                                |                     |                           |                           |
|----|-----------------------------------------------------------------------------------------------|----------------------------------------------------------------------------------------------------------------------------------------------------------------|---------------------|---------------------------|---------------------------|
| 1  | Papillary renal cell carcinoma: a clinicopathological and whole-genome exon sequencing study. | Liu K et al.                                                                                                                                                   | 26339402            | Not a renal disease focus |                           |
| 2  |                                                                                               |                                                                                                                                                                |                     |                           |                           |
| 3  |                                                                                               |                                                                                                                                                                |                     |                           |                           |
| 4  |                                                                                               |                                                                                                                                                                |                     |                           |                           |
| 5  |                                                                                               |                                                                                                                                                                |                     |                           |                           |
| 6  | 1                                                                                             | Common variation in KLKB1 and essential hypertension risk: tagging-SNP haplotype analysis in a case-control study                                              | Lu XF et al.        | 17318641                  | Not a renal disease focus |
| 7  |                                                                                               |                                                                                                                                                                |                     |                           |                           |
| 8  |                                                                                               |                                                                                                                                                                |                     |                           |                           |
| 9  |                                                                                               |                                                                                                                                                                |                     |                           |                           |
| 10 |                                                                                               |                                                                                                                                                                |                     |                           |                           |
| 11 | 1                                                                                             | The Connexin40 A96S Mutation Causes Renin-Dependent Hypertension                                                                                               | Lubkemeier I et al. | 21597036                  | Not a renal disease focus |
| 12 |                                                                                               |                                                                                                                                                                |                     |                           |                           |
| 13 | 1                                                                                             | Connexin 40 is dispensable for vascular renin cell recruitment but is indispensable for vascular baroreceptor control of renin secretion                       | Machura K et al.    | 25241776                  | Not a renal disease focus |
| 14 |                                                                                               |                                                                                                                                                                |                     |                           |                           |
| 15 | 1                                                                                             | The association between vitamin D receptor gene polymorphisms (TaqI and FokI), Type 2 diabetes, and micro-/macrovascular complications in postmenopausal women | Maia J et al.       | 27536155                  | Not a renal disease focus |
| 16 |                                                                                               |                                                                                                                                                                |                     |                           |                           |
| 17 |                                                                                               |                                                                                                                                                                |                     |                           |                           |
| 18 | 1                                                                                             | Angiotensin-converting enzyme (ACE) gene II genotype protects against the development of diabetic peripheral neuropathy in type 2 diabetes mellitus.           | Mansoor Q et al.    | 22607040                  | Not a renal disease focus |
| 19 |                                                                                               |                                                                                                                                                                |                     |                           |                           |
| 20 | 1                                                                                             | Apparent mineralocorticoid excess: Type I and type II                                                                                                          | Mantero F et al.    | 8732999                   | Not a renal disease focus |
| 21 |                                                                                               |                                                                                                                                                                |                     |                           |                           |
| 22 | 1                                                                                             | Low-salt diet and diuretic effect on blood pressure and organ damage                                                                                           | Manunta P et al.    | 14684671                  | Not a renal disease focus |
| 23 |                                                                                               |                                                                                                                                                                |                     |                           |                           |
| 24 | 1                                                                                             | Renal genetic mechanisms of essential hypertension                                                                                                             | Manunta P et al.    | 9377722                   | Not a renal disease focus |
| 25 |                                                                                               |                                                                                                                                                                |                     |                           |                           |
| 26 | 1                                                                                             | alpha-Adducin polymorphisms and renal sodium handling in essential hypertensive patients                                                                       | Manunta P et al.    | 9607177                   | Not a renal disease focus |
| 27 |                                                                                               |                                                                                                                                                                |                     |                           |                           |
| 28 | 1                                                                                             | Is angiotensin-converting enzyme inhibitors/angiotensin receptor blockers therapy protective against prostate cancer?                                          | Mao YQ et al.       | 26760503                  | Not a renal disease focus |
| 29 |                                                                                               |                                                                                                                                                                |                     |                           |                           |
| 30 | 1                                                                                             | Detection of the association between a deletion polymorphism in the gene encoding angiotensin I-converting enzyme and advanced diabetic retinopathy            | Matsumoto A et al.  | 11106834                  | Not a renal disease focus |
| 31 |                                                                                               |                                                                                                                                                                |                     |                           |                           |
| 32 | 1                                                                                             | Genotypic interactions of renin-angiotensin system genes with diabetes type 2 in a Tunisian population                                                         | Mehri S et al.      | 20580725                  | Not a renal disease focus |
| 33 |                                                                                               |                                                                                                                                                                |                     |                           |                           |
| 34 |                                                                                               |                                                                                                                                                                |                     |                           |                           |
| 35 |                                                                                               |                                                                                                                                                                |                     |                           |                           |
| 36 |                                                                                               |                                                                                                                                                                |                     |                           |                           |
| 37 |                                                                                               |                                                                                                                                                                |                     |                           |                           |
| 38 |                                                                                               |                                                                                                                                                                |                     |                           |                           |
| 39 |                                                                                               |                                                                                                                                                                |                     |                           |                           |
| 40 |                                                                                               |                                                                                                                                                                |                     |                           |                           |
| 41 |                                                                                               |                                                                                                                                                                |                     |                           |                           |
| 42 |                                                                                               |                                                                                                                                                                |                     |                           |                           |
| 43 |                                                                                               |                                                                                                                                                                |                     |                           |                           |
| 44 |                                                                                               |                                                                                                                                                                |                     |                           |                           |
| 45 |                                                                                               |                                                                                                                                                                |                     |                           |                           |
| 46 |                                                                                               |                                                                                                                                                                |                     |                           |                           |

|    |   |                                                                                                                                                                                                                            |                                 |          |                           |
|----|---|----------------------------------------------------------------------------------------------------------------------------------------------------------------------------------------------------------------------------|---------------------------------|----------|---------------------------|
| 1  | 1 | Angiotensin II type 1 receptor gene polymorphism and the response to hyperglycemia in early type 1 diabetes                                                                                                                | Miller JA et al.                | 10969844 | Not a renal disease focus |
| 2  | 1 | Renal ACE immunohistochemical localization in NIDDM patients with nephropathy                                                                                                                                              | Mizuiru S et al.                | 9469501  | Not a renal disease focus |
| 3  | 1 | Randomised controlled trial of dual blockade of renin-angiotensin system in patients with hypertension, microalbuminuria, and non-insulin dependent diabetes: the candesartan and Lisinopril microalbuminuria (CALM) study | Mogensen CE et al.              | 11110735 | Not a renal disease focus |
| 4  | 1 | Association of Polymorphisms in Endothelial Nitric Oxide Synthesis and Renin-Angiotensin-Aldosterone System with Developing of Coronary Artery Disease in Bulgarian Patients                                               | Mokretar K et al.               | 26670794 | Not a renal disease focus |
| 5  | 1 | Contribution of angiotensin I converting enzyme gene polymorphism and angiotensinogen gene polymorphism to blood pressure regulation in essential hypertension.                                                            | Mondorf UF et al.               | 9524045  | Not a renal disease focus |
| 6  | 1 | Inhibition of tissue angiotensin converting enzyme activity prevents malignant hypertension in TGR(mREN2)27.                                                                                                               | Montgomery HE et al.            | 9797175  | Not a renal disease focus |
| 7  | 1 | [Possible pathogenetic role of 11 beta-hydroxysteroid dehydrogenase type 1 (11betaHSD1) gene polymorphisms in arterial hypertension].                                                                                      | Morales MA et al.               | 18769825 | Not a renal disease focus |
| 8  | 1 | Inefficient arterial hypertension control in patients with metabolic syndrome and its link to renin-angiotensin-aldosterone system polymorphisms                                                                           | Morales-Suarez-Varela MM et al. | 21471972 | Not a renal disease focus |
| 9  | 1 | Trientine and renin-angiotensin system blockade ameliorate progression of glomerular morphology in hypertensive experimental diabetic nephropathy.                                                                         | Moya-Olano L et al.             | 22029676 | Not a renal disease focus |
| 10 | 1 | Is the influence of variation in the ACE gene on the prospective risk of Type 2 diabetes in middle-aged men modified by obesity?                                                                                           | Muthumala A et al.              | 17624939 | Not a renal disease focus |
| 11 | 1 | Evaluation Of The Sa Locus In Human Hypertension                                                                                                                                                                           | Nabika T et al.                 | 7843754  | Not a renal disease focus |
| 12 | 1 | Atrial Natriuretic Peptide Locally Counteracts the Deleterious Effects of Cardiomyocyte Mineralocorticoid Receptor Activation                                                                                              | Nakagawa H et al.               | 25027872 | Not a renal disease focus |



|    |                                                                                                                      |                      |          |                           |
|----|----------------------------------------------------------------------------------------------------------------------|----------------------|----------|---------------------------|
| 1  | Association between RAS gene polymorphisms (ACE I/D, AGT M235T) and Henoch-Schonlein purpura in a Turkish population | Nalbantoglu S et al. | 23151617 | Not a renal disease focus |
| 2  |                                                                                                                      |                      |          |                           |
| 3  |                                                                                                                      |                      |          |                           |
| 4  |                                                                                                                      |                      |          |                           |
| 5  |                                                                                                                      |                      |          |                           |
| 6  |                                                                                                                      |                      |          |                           |
| 7  |                                                                                                                      |                      |          |                           |
| 8  |                                                                                                                      |                      |          |                           |
| 9  |                                                                                                                      |                      |          |                           |
| 10 |                                                                                                                      |                      |          |                           |
| 11 |                                                                                                                      |                      |          |                           |
| 12 |                                                                                                                      |                      |          |                           |
| 13 |                                                                                                                      |                      |          |                           |
| 14 |                                                                                                                      |                      |          |                           |
| 15 |                                                                                                                      |                      |          |                           |
| 16 |                                                                                                                      |                      |          |                           |
| 17 |                                                                                                                      |                      |          |                           |
| 18 |                                                                                                                      |                      |          |                           |
| 19 |                                                                                                                      |                      |          |                           |
| 20 |                                                                                                                      |                      |          |                           |
| 21 |                                                                                                                      |                      |          |                           |
| 22 |                                                                                                                      |                      |          |                           |
| 23 |                                                                                                                      |                      |          |                           |
| 24 |                                                                                                                      |                      |          |                           |
| 25 |                                                                                                                      |                      |          |                           |
| 26 |                                                                                                                      |                      |          |                           |
| 27 |                                                                                                                      |                      |          |                           |
| 28 |                                                                                                                      |                      |          |                           |
| 29 |                                                                                                                      |                      |          |                           |
| 30 |                                                                                                                      |                      |          |                           |
| 31 |                                                                                                                      |                      |          |                           |
| 32 |                                                                                                                      |                      |          |                           |
| 33 |                                                                                                                      |                      |          |                           |
| 34 |                                                                                                                      |                      |          |                           |
| 35 |                                                                                                                      |                      |          |                           |
| 36 |                                                                                                                      |                      |          |                           |
| 37 |                                                                                                                      |                      |          |                           |
| 38 |                                                                                                                      |                      |          |                           |
| 39 |                                                                                                                      |                      |          |                           |
| 40 |                                                                                                                      |                      |          |                           |
| 41 |                                                                                                                      |                      |          |                           |
| 42 |                                                                                                                      |                      |          |                           |
| 43 |                                                                                                                      |                      |          |                           |
| 44 |                                                                                                                      |                      |          |                           |
| 45 |                                                                                                                      |                      |          |                           |
| 46 |                                                                                                                      |                      |          |                           |

|    |                                                                                                                                     |                                                                                                                                                                                            |                           |                           |                           |
|----|-------------------------------------------------------------------------------------------------------------------------------------|--------------------------------------------------------------------------------------------------------------------------------------------------------------------------------------------|---------------------------|---------------------------|---------------------------|
| 1  | A new mutation, R563Q, of the beta subunit of the epithelial sodium channel associated with low-renin, low-aldosterone hypertension | Rayner BL et al.                                                                                                                                                                           | 12714866                  | Not a renal disease focus |                           |
| 2  |                                                                                                                                     |                                                                                                                                                                                            |                           |                           |                           |
| 3  |                                                                                                                                     |                                                                                                                                                                                            |                           |                           |                           |
| 4  |                                                                                                                                     |                                                                                                                                                                                            |                           |                           |                           |
| 5  | 1                                                                                                                                   | Network-based regularization for high dimensional SNP data in the case-control study of Type 2 diabetes.                                                                                   | Ren J et al.              | 28511641                  | Not a renal disease focus |
| 6  |                                                                                                                                     |                                                                                                                                                                                            |                           |                           |                           |
| 7  |                                                                                                                                     |                                                                                                                                                                                            |                           |                           |                           |
| 8  |                                                                                                                                     |                                                                                                                                                                                            |                           |                           |                           |
| 9  |                                                                                                                                     |                                                                                                                                                                                            |                           |                           |                           |
| 10 | 1                                                                                                                                   | Pigsties near dwellings as a potential risk factor for the prevalence of Japanese encephalitis virus in adult in Shanxi, China.                                                            | Ren X et al.              | 28592296                  | Not a renal disease focus |
| 11 |                                                                                                                                     |                                                                                                                                                                                            |                           |                           |                           |
| 12 |                                                                                                                                     |                                                                                                                                                                                            |                           |                           |                           |
| 13 | 1                                                                                                                                   | Association of angiotensinogen M235T and A(-6)G gene polymorphisms with coronary heart disease with independence of essential hypertension: the PROCAGENE study. Prospective Cardiac Gene. | Rodriquez-Perez JC et al. | 11345362                  | Not a renal disease focus |
| 14 |                                                                                                                                     |                                                                                                                                                                                            |                           |                           |                           |
| 15 |                                                                                                                                     |                                                                                                                                                                                            |                           |                           |                           |
| 16 | 1                                                                                                                                   | A clinical phenotype mimicking essential hypertension in a newly discovered family with Liddle's syndrome.                                                                                 | Rossi E et al.            | 21525970                  | Not a renal disease focus |
| 17 |                                                                                                                                     |                                                                                                                                                                                            |                           |                           |                           |
| 18 | 1                                                                                                                                   | Vitamin D Deficiency in the Pathogenesis of Hypertension: Still an Unsettled Question                                                                                                      | Rostand SG et al.         | 24929953                  | Not a renal disease focus |
| 19 |                                                                                                                                     |                                                                                                                                                                                            |                           |                           |                           |
| 20 | 1                                                                                                                                   | Amelioration of genetic hypertension by suppression of renal G protein-coupled receptor kinase type 4 expression                                                                           | Sanada H et al.           | 16636192                  | Not a renal disease focus |
| 21 |                                                                                                                                     |                                                                                                                                                                                            |                           |                           |                           |
| 22 |                                                                                                                                     |                                                                                                                                                                                            |                           |                           |                           |
| 23 | 1                                                                                                                                   | Prevalence of angiotensin converting enzyme (ACE) gene insertion/deletion polymorphism in South Indian population with hypertension and chronic kidney disease.                            | Shanmuganathan R et al.   | 26440392                  | Not a renal disease focus |
| 24 |                                                                                                                                     |                                                                                                                                                                                            |                           |                           |                           |
| 25 |                                                                                                                                     |                                                                                                                                                                                            |                           |                           |                           |
| 26 |                                                                                                                                     |                                                                                                                                                                                            |                           |                           |                           |
| 27 | 1                                                                                                                                   | Novel SLC12A3 mutations in Chinese patients with Gitelman's syndrome.                                                                                                                      | Shao L et al.             | 18287808                  | Not a renal disease focus |
| 28 |                                                                                                                                     |                                                                                                                                                                                            |                           |                           |                           |
| 29 | 1                                                                                                                                   | Mechanisms of suppression of renal kallikrein activity in low renin essential hypertension and renoparenchymal hypertension.                                                               | Shimamoto K et al.        | 2676859                   | Not a renal disease focus |
| 30 |                                                                                                                                     |                                                                                                                                                                                            |                           |                           |                           |
| 31 | 1                                                                                                                                   | Systemic nitric oxide clamping in normal humans guided by total peripheral resistance                                                                                                      | Simonsen JA et al.        | 19785629                  | Not a renal disease focus |
| 32 |                                                                                                                                     |                                                                                                                                                                                            |                           |                           |                           |
| 33 |                                                                                                                                     |                                                                                                                                                                                            |                           |                           |                           |
| 34 | 1                                                                                                                                   | Exaggerated natriuresis during clamping of systemic NO supply in healthy young men                                                                                                         | Simonsen JA et al.        | 21749320                  | Not a renal disease focus |
| 35 |                                                                                                                                     |                                                                                                                                                                                            |                           |                           |                           |
| 36 |                                                                                                                                     |                                                                                                                                                                                            |                           |                           |                           |
| 37 |                                                                                                                                     |                                                                                                                                                                                            |                           |                           |                           |
| 38 |                                                                                                                                     |                                                                                                                                                                                            |                           |                           |                           |
| 39 |                                                                                                                                     |                                                                                                                                                                                            |                           |                           |                           |
| 40 |                                                                                                                                     |                                                                                                                                                                                            |                           |                           |                           |
| 41 |                                                                                                                                     |                                                                                                                                                                                            |                           |                           |                           |
| 42 |                                                                                                                                     |                                                                                                                                                                                            |                           |                           |                           |
| 43 |                                                                                                                                     |                                                                                                                                                                                            |                           |                           |                           |
| 44 |                                                                                                                                     |                                                                                                                                                                                            |                           |                           |                           |
| 45 |                                                                                                                                     |                                                                                                                                                                                            |                           |                           |                           |
| 46 |                                                                                                                                     |                                                                                                                                                                                            |                           |                           |                           |

|    |                                                                                                                                                           |                                                                                                                                                         |                          |                           |                           |
|----|-----------------------------------------------------------------------------------------------------------------------------------------------------------|---------------------------------------------------------------------------------------------------------------------------------------------------------|--------------------------|---------------------------|---------------------------|
| 1  | Angiotensin-converting enzyme gene I/D polymorphism increases the susceptibility to hypertension and additive diseases: A study on North Indian patients. | Singh M et al.                                                                                                                                          | 27030424                 | Not a renal disease focus |                           |
| 2  |                                                                                                                                                           |                                                                                                                                                         |                          |                           |                           |
| 3  |                                                                                                                                                           |                                                                                                                                                         |                          |                           |                           |
| 4  |                                                                                                                                                           |                                                                                                                                                         |                          |                           |                           |
| 5  |                                                                                                                                                           |                                                                                                                                                         |                          |                           |                           |
| 6  | 1                                                                                                                                                         | Renal haemodynamics are not related to genotypes in offspring of parents with essential hypertension                                                    | Skov K et al.            | 17083073                  | Not a renal disease focus |
| 7  |                                                                                                                                                           |                                                                                                                                                         |                          |                           |                           |
| 8  |                                                                                                                                                           |                                                                                                                                                         |                          |                           |                           |
| 9  |                                                                                                                                                           |                                                                                                                                                         |                          |                           |                           |
| 10 |                                                                                                                                                           |                                                                                                                                                         |                          |                           |                           |
| 11 | 1                                                                                                                                                         | Association between renin-angiotensin-aldosterone system-related genes and blood pressure in a Korean population.                                       | Song SB et al.           | 21342026                  | Not a renal disease focus |
| 12 |                                                                                                                                                           |                                                                                                                                                         |                          |                           |                           |
| 13 | 1                                                                                                                                                         | Phenotype-genotype interactions on renal function in type 2 diabetes: an analysis using structural equation modelling                                   | Song XY et al.           | 19479237                  | Not a renal disease focus |
| 14 |                                                                                                                                                           |                                                                                                                                                         |                          |                           |                           |
| 15 | 1                                                                                                                                                         | Alpha Adducin G460T Variant is a Risk Factor for Hypertension in Tunisian Population                                                                    | Soualmia H et al.        | 27349000                  | Not a renal disease focus |
| 16 |                                                                                                                                                           |                                                                                                                                                         |                          |                           |                           |
| 17 | 1                                                                                                                                                         | Angiotensin II sensitivity in nonpregnant formerly preeclamptic women and healthy parous controls                                                       | Spaanderman MEA et al.   | 15350256                  | Not a renal disease focus |
| 18 |                                                                                                                                                           |                                                                                                                                                         |                          |                           |                           |
| 19 | 1                                                                                                                                                         | Angiotensin II Type 1A Receptors in Vascular Smooth Muscle Cells Do Not Influence Aortic Remodeling in Hypertension                                     | Sparks MA et al.         | 21242463                  | Not a renal disease focus |
| 20 |                                                                                                                                                           |                                                                                                                                                         |                          |                           |                           |
| 21 | 1                                                                                                                                                         | Association between polymorphisms of the renin-angiotensin system and more severe histological forms of lupus nephritis                                 | Sprovieri SRS et al.     | 16047641                  | Not a renal disease focus |
| 22 |                                                                                                                                                           |                                                                                                                                                         |                          |                           |                           |
| 23 | 1                                                                                                                                                         | Wilms' tumor protein (-KTS) modulates renin gene transcription                                                                                          | Steege A et al.          | 18496514                  | Not a renal disease focus |
| 24 |                                                                                                                                                           |                                                                                                                                                         |                          |                           |                           |
| 25 |                                                                                                                                                           |                                                                                                                                                         |                          |                           |                           |
| 26 |                                                                                                                                                           |                                                                                                                                                         |                          |                           |                           |
| 27 | 1                                                                                                                                                         | Angiotensin-converting enzyme gene I/D polymorphism in malignant hypertension                                                                           | Stefansson B et al.      | 10855732                  | Not a renal disease focus |
| 28 |                                                                                                                                                           |                                                                                                                                                         |                          |                           |                           |
| 29 | 1                                                                                                                                                         | Transforming growth factor-beta(1) hyperexpression in African-American hypertensives: A novel mediator of hypertension and/or target organ damage       | Suthanthiran M et al.    | 10725360                  | Not a renal disease focus |
| 30 |                                                                                                                                                           |                                                                                                                                                         |                          |                           |                           |
| 31 | 1                                                                                                                                                         | A functional variant of the NEDD4L gene is associated with beneficial treatment response with $\beta$ -blockers and diuretics in hypertensive patients. | Svensson-Farbom P et al. | 21052022                  | Not a renal disease focus |
| 32 |                                                                                                                                                           |                                                                                                                                                         |                          |                           |                           |
| 33 |                                                                                                                                                           |                                                                                                                                                         |                          |                           |                           |
| 34 | 1                                                                                                                                                         | Genetic variants in hypertensive patients with coronary artery disease and coexisting atheromatous renal artery stenosis                                | Szperl M et al.          | 19043368                  | Not a renal disease focus |
| 35 |                                                                                                                                                           |                                                                                                                                                         |                          |                           |                           |
| 36 |                                                                                                                                                           |                                                                                                                                                         |                          |                           |                           |
| 37 |                                                                                                                                                           |                                                                                                                                                         |                          |                           |                           |
| 38 |                                                                                                                                                           |                                                                                                                                                         |                          |                           |                           |
| 39 |                                                                                                                                                           |                                                                                                                                                         |                          |                           |                           |
| 40 |                                                                                                                                                           |                                                                                                                                                         |                          |                           |                           |
| 41 |                                                                                                                                                           |                                                                                                                                                         |                          |                           |                           |
| 42 |                                                                                                                                                           |                                                                                                                                                         |                          |                           |                           |
| 43 |                                                                                                                                                           |                                                                                                                                                         |                          |                           |                           |
| 44 |                                                                                                                                                           |                                                                                                                                                         |                          |                           |                           |
| 45 |                                                                                                                                                           |                                                                                                                                                         |                          |                           |                           |
| 46 |                                                                                                                                                           |                                                                                                                                                         |                          |                           |                           |

|    |                                                                                                                                                      |                                                                                                                                                                                    |                      |                           |                           |
|----|------------------------------------------------------------------------------------------------------------------------------------------------------|------------------------------------------------------------------------------------------------------------------------------------------------------------------------------------|----------------------|---------------------------|---------------------------|
| 1  | Melatonin prevents maternal fructose intake-induced programmed hypertension in the offspring: roles of nitric oxide and arachidonic acid metabolites | Tain YL et al.                                                                                                                                                                     | 24867192             | Not a renal disease focus |                           |
| 2  |                                                                                                                                                      |                                                                                                                                                                                    |                      |                           |                           |
| 3  |                                                                                                                                                      |                                                                                                                                                                                    |                      |                           |                           |
| 4  |                                                                                                                                                      |                                                                                                                                                                                    |                      |                           |                           |
| 5  |                                                                                                                                                      |                                                                                                                                                                                    |                      |                           |                           |
| 6  | 1                                                                                                                                                    | Genetic variants in the inositol phosphate metabolism pathway and risk of different types of cancer.                                                                               | Tan J et al.         | 25683757                  | Not a renal disease focus |
| 7  |                                                                                                                                                      |                                                                                                                                                                                    |                      |                           |                           |
| 8  |                                                                                                                                                      |                                                                                                                                                                                    |                      |                           |                           |
| 9  |                                                                                                                                                      |                                                                                                                                                                                    |                      |                           |                           |
| 10 | 1                                                                                                                                                    | Renin in blood vessels in human pulmonary tumors. An immunohistochemical and biochemical study.                                                                                    | Taylor GM et al.     | 2450464                   | Not a renal disease focus |
| 11 |                                                                                                                                                      |                                                                                                                                                                                    |                      |                           |                           |
| 12 |                                                                                                                                                      |                                                                                                                                                                                    |                      |                           |                           |
| 13 | 1                                                                                                                                                    | Incidence of renal failure and nephroprotection by RAAS inhibition in heterozygous carriers of X-chromosomal and autosomal recessive Alport mutations.                             | Temme J et al.       | 22237748                  | Not a renal disease focus |
| 14 |                                                                                                                                                      |                                                                                                                                                                                    |                      |                           |                           |
| 15 |                                                                                                                                                      |                                                                                                                                                                                    |                      |                           |                           |
| 16 | 1                                                                                                                                                    | Peripheral vascular disease in type 2 diabetic Chinese patients: associations with metabolic indices, concomitant vascular disease and genetic factors                             | Thomas GN et al.     | 14632699                  | Not a renal disease focus |
| 17 |                                                                                                                                                      |                                                                                                                                                                                    |                      |                           |                           |
| 18 |                                                                                                                                                      |                                                                                                                                                                                    |                      |                           |                           |
| 19 | 1                                                                                                                                                    | Albuminuria and the renin-angiotensin system gene polymorphisms in type-2-diabetic and in normoglycemic hypertensive Chinese                                                       | Thomas GN et al.     | 11200871                  | Not a renal disease focus |
| 20 |                                                                                                                                                      |                                                                                                                                                                                    |                      |                           |                           |
| 21 |                                                                                                                                                      |                                                                                                                                                                                    |                      |                           |                           |
| 22 | 1                                                                                                                                                    | Middle cerebral artery stenosis in type II diabetic Chinese patients is associated with conventional risk factors but not with polymorphisms of the renin-angiotensin system genes | Thomas GN et al.     | 12865608                  | Not a renal disease focus |
| 23 |                                                                                                                                                      |                                                                                                                                                                                    |                      |                           |                           |
| 24 |                                                                                                                                                      |                                                                                                                                                                                    |                      |                           |                           |
| 25 | 1                                                                                                                                                    | Genetic variation in the KCNMA1 potassium channel alpha subunit as risk factor for severe essential hypertension and myocardial infarction                                         | Tomas M et al.       | 18854754                  | Not a renal disease focus |
| 26 |                                                                                                                                                      |                                                                                                                                                                                    |                      |                           |                           |
| 27 |                                                                                                                                                      |                                                                                                                                                                                    |                      |                           |                           |
| 28 | 1                                                                                                                                                    | Renal Mechanisms of Association between Fibroblast Growth Factor 1 and Blood Pressure                                                                                              | Tomaszewski M et al. | 25918036                  | Not a renal disease focus |
| 29 |                                                                                                                                                      |                                                                                                                                                                                    |                      |                           |                           |
| 30 |                                                                                                                                                      |                                                                                                                                                                                    |                      |                           |                           |
| 31 | 1                                                                                                                                                    | Angiotensin II-dependent chronic hypertension and cardiac hypertrophy are unaffected by gp91phox-containing NADPH oxidase                                                          | Touyz RM et al.      | 15753233                  | Not a renal disease focus |
| 32 |                                                                                                                                                      |                                                                                                                                                                                    |                      |                           |                           |
| 33 |                                                                                                                                                      |                                                                                                                                                                                    |                      |                           |                           |
| 34 | 1                                                                                                                                                    | Renin Production In Congenital Mesoblastic Nephroma In Comparison With That In Wilms-Tumor                                                                                         | Tsuchida Y et al.    | 8385325                   | Not a renal disease focus |
| 35 |                                                                                                                                                      |                                                                                                                                                                                    |                      |                           |                           |
| 36 |                                                                                                                                                      |                                                                                                                                                                                    |                      |                           |                           |
| 37 | 1                                                                                                                                                    | Genomic association analysis identifies multiple loci influencing antihypertensive response to an angiotensin II receptor blocker.                                                 | Turner ST et al.     | 22566498                  | Not a renal disease focus |
| 38 |                                                                                                                                                      |                                                                                                                                                                                    |                      |                           |                           |
| 39 |                                                                                                                                                      |                                                                                                                                                                                    |                      |                           |                           |
| 40 |                                                                                                                                                      |                                                                                                                                                                                    |                      |                           |                           |
| 41 |                                                                                                                                                      |                                                                                                                                                                                    |                      |                           |                           |
| 42 |                                                                                                                                                      |                                                                                                                                                                                    |                      |                           |                           |
| 43 |                                                                                                                                                      |                                                                                                                                                                                    |                      |                           |                           |
| 44 |                                                                                                                                                      |                                                                                                                                                                                    |                      |                           |                           |
| 45 |                                                                                                                                                      |                                                                                                                                                                                    |                      |                           |                           |
| 46 |                                                                                                                                                      |                                                                                                                                                                                    |                      |                           |                           |

|    |   |                                                                                                                                         |                         |          |                           |
|----|---|-----------------------------------------------------------------------------------------------------------------------------------------|-------------------------|----------|---------------------------|
| 1  | 1 | Angiotensin-converting enzyme gene polymorphism and vascular manifestations in Korean patients with SLE                                 | Uhm WS et al.           | 12043886 | Not a renal disease focus |
| 2  | 1 | The M235T polymorphism in the angiotensinogen gene is associated with the risk of malignant hypertension in white patients              | van den Born BJH et al. | 17921816 | Not a renal disease focus |
| 3  | 1 | Genetic risk of atherosclerotic renal artery disease - The candidate gene approach in a renal angiography cohort                        | van Onna M et al.       | 15326089 | Not a renal disease focus |
| 4  | 1 | Activation of the hypothalamic-pituitary-adrenal axis in adults with mineralocorticoid receptor haploinsufficiency.                     | Walker BR et al.        | 24712576 | Not a renal disease focus |
| 5  | 1 | Liver pyruvate kinase polymorphisms are associated with type 2 diabetes in northern European Caucasians.                                | Wang H et al.           | 12196482 | Not a renal disease focus |
| 6  | 1 | miR149 rs71428439 polymorphism and risk of clear cell renal cell carcinoma: a case-control study.                                       | Wang Z et al.           | 25213695 | Not a renal disease focus |
| 7  | 1 | Genotype-phenotype analysis of angiotensinogen polymorphisms and essential hypertension: the importance of haplotypes                   | Watkins WS et al.       | 19770777 | Not a renal disease focus |
| 8  | 1 | Angiotensin-converting enzyme gene does not contribute to genetic susceptibility to systemic sclerosis in European Caucasians.          | Wipff J et al.          | 19132786 | Not a renal disease focus |
| 9  | 1 | Androgen-Sensitive Hypertension Associates with Upregulated Vascular CYP4A12-20-HETE Synthase                                           | Wu CC et al.            | 23641057 | Not a renal disease focus |
| 10 | 1 | Urinary UMOD excretion and chronic kidney disease in gout patients: cross-sectional case-control study.                                 | Wu CH et al.            | 21332338 | Not a renal disease focus |
| 11 | 1 | Unknown face of known drugs - what else can we expect from angiotensin converting enzyme inhibitors?                                    | Wzgarda A et al.        | 28087255 | Not a renal disease focus |
| 12 | 1 | Malignant Nephrosclerosis in a Patient with Familial Mediterranean Fever                                                                | Yamanouchi M et al.     | 26466703 | Not a renal disease focus |
| 13 | 1 | Gene polymorphism of vascular endothelial growth factor-1154 G > A is associated with hypertensive nephropathy in a Hispanic population | Yang JW et al.          | 21080079 | Not a renal disease focus |
| 14 | 1 | TBX6 compound inheritance leads to congenital vertebral malformations in humans and mice.                                               | Yang N et al.           | 30307510 | Not a renal disease focus |

|   |                                                                                                                                                                   |                      |          |                           |
|---|-------------------------------------------------------------------------------------------------------------------------------------------------------------------|----------------------|----------|---------------------------|
| 1 | Identification of diuretic non-responders with poor long-term clinical outcomes: a 1-year follow-up of 176 non-azotaemic cirrhotic patients with moderate ascites | Yang YY et al.       | 21692745 | Not a renal disease focus |
| 1 | Renal redox-sensitive signaling, but not blood pressure, is attenuated by Nox1 knockout in angiotensin II-dependent chronic hypertension                          | Yogi A et al.        | 18195161 | Not a renal disease focus |
| 1 | Angiotensin II type 2 receptor gene is not responsible for familial vesicoureteral reflux                                                                         | Yoneda A et al.      | 12187255 | Not a renal disease focus |
| 1 | Angiotensinogen T235 and ACE insertion/deletion polymorphisms associated with albuminuria in Chinese type 2 diabetic patients                                     | Young RP et al.      | 9540028  | Not a renal disease focus |
| 1 | Common genetic variants in the chromogranin a promoter are associated with renal injury in IgA nephropathy patients with malignant hypertension.                  | Yu L et al.          | 20113265 | Not a renal disease focus |
| 1 | Frequencies Of Variants Of Candidate Genes In Different Age-Groups Of Hypertensives                                                                               | Zee RY et al.        | 7882587  | Not a renal disease focus |
| 1 | Association of angiotensin-converting enzyme gene polymorphisms with Crohn's disease in a Chinese Han population                                                  | Zhou J et al.        | 26823847 | Not a renal disease focus |
| 1 | Molecular variants of the sodium/hydrogen exchanger type 3 gene and essential hypertension                                                                        | Zhu HD et al.        | 15201541 | Not a renal disease focus |
| 1 | [Renin-angiotensin system genes in chronic glomerulonephritis].                                                                                                   | Buraczynska M et al. | 11865575 | Not English or Spanish    |
| 1 | [Association of the renin-angiotensin system gene polymorphism with nephropathy in type II diabetes].                                                             | Buraczynska M et al. | 12476891 | Not English or Spanish    |
| 1 | [Genetic predisposition to systemic complications of arterial hypertension in maintenance haemodialysis patients].                                                | Bzoma B et al.       | 19112833 | Not English or Spanish    |
| 1 | [Arterial hypertension and chronic hemodialysis].                                                                                                                 | Ermolenko VM et al.  | 7700     | Not English or Spanish    |
| 1 | [Mutations in NPHS2 in familial steroid-resistant nephrotic syndrome in Southern Chinese Han ethnic group].                                                       | Fu R et al.          | 19099831 | Not English or Spanish    |

1  
2  
3  
4  
5  
6  
7  
8  
9  
10  
11  
12  
13  
14  
15  
16  
17  
18  
19  
20  
21  
22  
23  
24  
25  
26  
27  
28  
29  
30  
31  
32  
33  
34  
35  
36  
37  
38  
39  
40  
41  
42  
43  
44  
45  
46

|   |                                                                                                                                                                            |                             |          |                        |
|---|----------------------------------------------------------------------------------------------------------------------------------------------------------------------------|-----------------------------|----------|------------------------|
| 1 | [Is PstI polymorphism of the angiotensin I converting enzyme gene associated with nephropathy development in non-insulin-dependent diabetes mellitus (preliminary study)]. | Grzeszczak W et al.         | 9499204  | Not English or Spanish |
| 1 | [Angiotensin-converting enzyme gene polymorphism and the clinical pathological features and progression in lupus nephritis].                                               | Guan T et al.               | 10436947 | Not English or Spanish |
| 1 | [Angiotensin-converting enzyme insertion/deletion polymorphism and blood pressure regulation in type 2 diabetic patients].                                                 | Krajina-Andricevic M et al. | 23120809 | Not English or Spanish |
| 1 | [Relationship between I/D polymorphism of angiotensin I converting enzyme gene and microvascular complications in type 2 diabetic patients].                               | Moleda P et al.             | 17941464 | Not English or Spanish |
| 1 | [Genomics of type 1 diabetes mellitus and its late complications]                                                                                                          | Nosikov VV                  | 15042845 | Not English or Spanish |
| 1 | [Correlation between HLA-DQA1 allele and anaphylactoid purpura in juvenile Hans residing in Inner Mongolia].                                                               | Ren S et al.                | 11836690 | Not English or Spanish |
| 1 | [Correlation of cyclin D1 overexpression to mutations of von hippel-lindau gene in renal clear cell carcinoma].                                                            | Ren YY et al.               | 16480581 | Not English or Spanish |
| 1 | [Morphofunctional characteristics of endocrine nephropathy in primary aldosteronism].                                                                                      | Sokolova RI et al.          | 2678677  | Not English or Spanish |
| 1 | [Gene mutation analysis of X-linked hypophosphatemic rickets].                                                                                                             | Song Y et al.               | 24229582 | Not English or Spanish |
| 1 | [A novel COL4A5 splicing mutation causing Alport syndrome in a Chinese family].                                                                                            | Tang Z et al.               | 19065523 | Not English or Spanish |
| 1 | [Association of single nucleotide polymorphism of megsin gene with IgA nephropathy].                                                                                       | Wang ZH et al.              | 16796905 | Not English or Spanish |
| 1 | [Study on the association between the polymorphism of HLA-DQA1 alleles and type 2 diabetes in Yunnan Han nationality].                                                     | Yang HY et al.              | 15192842 | Not English or Spanish |
| 1 | DD Genotype of ACE Gene in Boys: May it be a Risk Factor for Minimal Change Nephrotic Syndrome?                                                                            | Alasehirli B et al.         | 22017506 | Paediatric individuals |
| 1 | Angiotensin-converting enzyme gene insertion/deletion polymorphism and renal damage in childhood uropathies                                                                | Al-Eisa A et al.            | 10986863 | Paediatric individuals |

|    |                                                                                                                                                            |                    |          |                        |
|----|------------------------------------------------------------------------------------------------------------------------------------------------------------|--------------------|----------|------------------------|
| 1  | Angiotensin converting enzyme gene polymorphism in Asian Indian children with congenital uropathies                                                        | Bajpai M et al.    | 14713838 | Paediatric individuals |
| 2  |                                                                                                                                                            |                    |          |                        |
| 3  |                                                                                                                                                            |                    |          |                        |
| 4  |                                                                                                                                                            |                    |          |                        |
| 5  |                                                                                                                                                            |                    |          |                        |
| 6  | 1 Posterior urethral valves: Preliminary observations on the significance of plasma renin activity as a prognostic marker                                  | Bajpai M et al.    | 15643266 | Paediatric individuals |
| 7  |                                                                                                                                                            |                    |          |                        |
| 8  |                                                                                                                                                            |                    |          |                        |
| 9  | 1 Nitric oxide synthase gene polymorphisms in children with primary nocturnal enuresis: a preliminary study.                                               | Balat A et al.     | 17365914 | Paediatric individuals |
| 10 |                                                                                                                                                            |                    |          |                        |
| 11 | 1 MCP1 2518 A/G polymorphism affects progression of childhood focal segmental glomerulosclerosis.                                                          | Besbas N et al.    | 26335292 | Paediatric individuals |
| 12 |                                                                                                                                                            |                    |          |                        |
| 13 | 1 Heterozygous Loss-of-Function SEC61A1 Mutations Cause Autosomal-Dominant Tubulo-Interstitial and Glomerulocystic Kidney Disease with Anemia              | Bolar NA et al.    | 27392076 | Paediatric individuals |
| 14 |                                                                                                                                                            |                    |          |                        |
| 15 | 1 Donor and recipient ACE I/D genotype are associated with loss of renal function in children following renal transplantation                              | Buscher R et al.   | 21309964 | Paediatric individuals |
| 16 |                                                                                                                                                            |                    |          |                        |
| 17 | 1 ACE gene polymorphism in Turkish children with nephrotic syndrome.                                                                                       | Celik US et al.    | 16825089 | Paediatric individuals |
| 18 |                                                                                                                                                            |                    |          |                        |
| 19 | 1 Increased HLA- A*11 in Chinese children with steroid-responsive nephrotic syndrome.                                                                      | Cheung W et al.    | 11956863 | Paediatric individuals |
| 20 |                                                                                                                                                            |                    |          |                        |
| 21 | 1 Liddle syndrome: clinical and genetic profiles.                                                                                                          | Cui Y et al.       | 27896928 | Paediatric individuals |
| 22 |                                                                                                                                                            |                    |          |                        |
| 23 | 1 NPHS2 variation in Chinese southern infants with late steroid-resistant nephrotic syndrome.                                                              | Dai Y et al.       | 25112471 | Paediatric individuals |
| 24 |                                                                                                                                                            |                    |          |                        |
| 25 | 1 Earlier Onset of Complications in Youth With Type 2 Diabetes                                                                                             | Dart AB et al.     | 24130346 | Paediatric individuals |
| 26 |                                                                                                                                                            |                    |          |                        |
| 27 | 1 ACE gene polymorphism in Egyptian children with idiopathic nephrotic syndrome                                                                            | Fahmy ME et al.    | 18792483 | Paediatric individuals |
| 28 |                                                                                                                                                            |                    |          |                        |
| 29 | 1 Genetic polymorphisms of the renin-angiotensin system and the outcome of focal segmental glomerulosclerosis in children                                  | Frishberg Y et al. | 9853248  | Paediatric individuals |
| 30 |                                                                                                                                                            |                    |          |                        |
| 31 | 1 Angiotensinogen gene T235 variant: a marker for the development of persistent microalbuminuria in children and adolescents with type 1 diabetes mellitus | Gallego PH et al.  | 18413222 | Paediatric individuals |
| 32 |                                                                                                                                                            |                    |          |                        |
| 33 |                                                                                                                                                            |                    |          |                        |
| 34 |                                                                                                                                                            |                    |          |                        |
| 35 |                                                                                                                                                            |                    |          |                        |
| 36 |                                                                                                                                                            |                    |          |                        |
| 37 |                                                                                                                                                            |                    |          |                        |
| 38 |                                                                                                                                                            |                    |          |                        |
| 39 |                                                                                                                                                            |                    |          |                        |
| 40 |                                                                                                                                                            |                    |          |                        |
| 41 |                                                                                                                                                            |                    |          |                        |
| 42 |                                                                                                                                                            |                    |          |                        |
| 43 |                                                                                                                                                            |                    |          |                        |
| 44 |                                                                                                                                                            |                    |          |                        |
| 45 |                                                                                                                                                            |                    |          |                        |
| 46 |                                                                                                                                                            |                    |          |                        |



|    |                                                                                                                                     |                                                                                                                                                                   |                       |                        |                        |
|----|-------------------------------------------------------------------------------------------------------------------------------------|-------------------------------------------------------------------------------------------------------------------------------------------------------------------|-----------------------|------------------------|------------------------|
| 1  | Autosomal dominant pseudohypoaldosteronism type 1: Mechanisms, evidence for neonatal lethality, and phenotypic expression in adults | Geller DS et al.                                                                                                                                                  | 16611713              | Paediatric individuals |                        |
| 2  |                                                                                                                                     |                                                                                                                                                                   |                       |                        |                        |
| 3  |                                                                                                                                     |                                                                                                                                                                   |                       |                        |                        |
| 4  | 1                                                                                                                                   | The role of vitamin D receptor gene polymorphisms in Turkish infants with urolithiasis.                                                                           | Goknar N et al.       | 26908058               | Paediatric individuals |
| 5  |                                                                                                                                     |                                                                                                                                                                   |                       |                        |                        |
| 6  | 1                                                                                                                                   | Risk factors for loss of residual renal function in children treated with chronic peritoneal dialysis                                                             | Ha IS et al.          | 25874598               | Paediatric individuals |
| 7  |                                                                                                                                     |                                                                                                                                                                   |                       |                        |                        |
| 8  | 1                                                                                                                                   | Implication of genetic variations in congenital obstructive nephropathy                                                                                           | Hahn H et al.         | 16133060               | Paediatric individuals |
| 9  |                                                                                                                                     |                                                                                                                                                                   |                       |                        |                        |
| 10 | 1                                                                                                                                   | ACE gene polymorphism and renal scarring in primary vesicoureteric reflux                                                                                         | Haszon I et al.       | 12478352               | Paediatric individuals |
| 11 |                                                                                                                                     |                                                                                                                                                                   |                       |                        |                        |
| 12 | 1                                                                                                                                   | Impact of ACE I/D gene polymorphism on congenital renal malformations                                                                                             | Hohenfellner K et al. | 11354781               | Paediatric individuals |
| 13 |                                                                                                                                     |                                                                                                                                                                   |                       |                        |                        |
| 14 | 1                                                                                                                                   | Impact of common functional polymorphisms in renin angiotensin system genes on the risk of renal parenchymal scarring following childhood urinary tract infection | Hussein A et al.      | 25939993               | Paediatric individuals |
| 15 |                                                                                                                                     |                                                                                                                                                                   |                       |                        |                        |
| 16 | 1                                                                                                                                   | An insertion/deletion ACE polymorphism and kidney size in Polish full-term newborns                                                                               | Kaczmarczyk M et al.  | 22674971               | Paediatric individuals |
| 17 |                                                                                                                                     |                                                                                                                                                                   |                       |                        |                        |
| 18 | 1                                                                                                                                   | ACE and AT1 receptor gene polymorphisms and renal scarring in urinary bladder dysfunction                                                                         | Kostic M et al.       | 15179569               | Paediatric individuals |
| 19 |                                                                                                                                     |                                                                                                                                                                   |                       |                        |                        |
| 20 | 1                                                                                                                                   | Renal tubular dysgenesis, a not uncommon autosomal recessive disorder leading to oligohydramnios: Role of the Renin-Angiotensin system.                           | Lacoste M et al.      | 16790508               | Paediatric individuals |
| 21 |                                                                                                                                     |                                                                                                                                                                   |                       |                        |                        |
| 22 | 1                                                                                                                                   | Renin-angiotensin system gene polymorphisms in children with Henoch-Schonlein purpura in West China                                                               | Liu DS et al.         | 20702504               | Paediatric individuals |
| 23 |                                                                                                                                     |                                                                                                                                                                   |                       |                        |                        |
| 24 | 1                                                                                                                                   | Renin-angiotensin system polymorphisms in Taiwanese primary vesicoureteral reflux                                                                                 | Liu KP et al.         | 15045574               | Paediatric individuals |
| 25 |                                                                                                                                     |                                                                                                                                                                   |                       |                        |                        |
| 26 | 1                                                                                                                                   | Polymorphisms of renin-angiotensin system genes in childhood IgA nephropathy                                                                                      | Maruyama K et al.     | 11354780               | Paediatric individuals |
| 27 |                                                                                                                                     |                                                                                                                                                                   |                       |                        |                        |
| 28 | 1                                                                                                                                   | Association of angiotensin type 2 receptor gene polymorphisms with ureteropelvic junction obstruction in Brazilian patients                                       | Miranda DM et al.     | 24995698               | Paediatric individuals |
| 29 |                                                                                                                                     |                                                                                                                                                                   |                       |                        |                        |
| 30 |                                                                                                                                     |                                                                                                                                                                   |                       |                        |                        |
| 31 |                                                                                                                                     |                                                                                                                                                                   |                       |                        |                        |
| 32 |                                                                                                                                     |                                                                                                                                                                   |                       |                        |                        |
| 33 |                                                                                                                                     |                                                                                                                                                                   |                       |                        |                        |
| 34 |                                                                                                                                     |                                                                                                                                                                   |                       |                        |                        |
| 35 |                                                                                                                                     |                                                                                                                                                                   |                       |                        |                        |
| 36 |                                                                                                                                     |                                                                                                                                                                   |                       |                        |                        |
| 37 |                                                                                                                                     |                                                                                                                                                                   |                       |                        |                        |
| 38 |                                                                                                                                     |                                                                                                                                                                   |                       |                        |                        |
| 39 |                                                                                                                                     |                                                                                                                                                                   |                       |                        |                        |
| 40 |                                                                                                                                     |                                                                                                                                                                   |                       |                        |                        |
| 41 |                                                                                                                                     |                                                                                                                                                                   |                       |                        |                        |
| 42 |                                                                                                                                     |                                                                                                                                                                   |                       |                        |                        |
| 43 |                                                                                                                                     |                                                                                                                                                                   |                       |                        |                        |
| 44 |                                                                                                                                     |                                                                                                                                                                   |                       |                        |                        |
| 45 |                                                                                                                                     |                                                                                                                                                                   |                       |                        |                        |
| 46 |                                                                                                                                     |                                                                                                                                                                   |                       |                        |                        |

|    |                                                                                                                                                |                                                                                                                                                                                         |                      |                        |                        |
|----|------------------------------------------------------------------------------------------------------------------------------------------------|-----------------------------------------------------------------------------------------------------------------------------------------------------------------------------------------|----------------------|------------------------|------------------------|
| 1  | Association of angiotensin converting enzyme and angiotensin type 2 receptor gene polymorphisms with renal damage in posterior urethral valves | Narasimhan KL et al.                                                                                                                                                                    | WOS:000290840100006  | Paediatric individuals |                        |
| 2  |                                                                                                                                                |                                                                                                                                                                                         |                      |                        |                        |
| 3  |                                                                                                                                                |                                                                                                                                                                                         |                      |                        |                        |
| 4  |                                                                                                                                                |                                                                                                                                                                                         |                      |                        |                        |
| 5  |                                                                                                                                                |                                                                                                                                                                                         |                      |                        |                        |
| 6  |                                                                                                                                                |                                                                                                                                                                                         |                      |                        |                        |
| 7  |                                                                                                                                                |                                                                                                                                                                                         |                      |                        |                        |
| 8  | 1                                                                                                                                              | Prioritization and burden analysis of rare variants in 208 candidate genes suggest they do not play a major role in CAKUT                                                               | Nicolaou N et al.    | 26489027               | Paediatric individuals |
| 9  |                                                                                                                                                |                                                                                                                                                                                         |                      |                        |                        |
| 10 | 1                                                                                                                                              | ACE I/D gene polymorphism in primary FSGS and steroid-sensitive nephrotic syndrome                                                                                                      | Oktem F et al.       | 14986085               | Paediatric individuals |
| 11 |                                                                                                                                                |                                                                                                                                                                                         |                      |                        |                        |
| 12 | 1                                                                                                                                              | Implications of certain genetic polymorphisms in scarring in vesicoureteric reflux: importance of ACE polymorphism.                                                                     | Ozen S et al.        | 10401028               | Paediatric individuals |
| 13 |                                                                                                                                                |                                                                                                                                                                                         |                      |                        |                        |
| 14 | 1                                                                                                                                              | Renin-angiotensin system gene polymorphisms: association with susceptibility to Henoch-Schonlein purpura and renal involvement                                                          | Ozkaya O et al.      | 16521052               | Paediatric individuals |
| 15 |                                                                                                                                                |                                                                                                                                                                                         |                      |                        |                        |
| 16 | 1                                                                                                                                              | Renin-angiotensin gene polymorphism in children with uremia and essential hypertension                                                                                                  | Papp F et al.        | 12579405               | Paediatric individuals |
| 17 |                                                                                                                                                |                                                                                                                                                                                         |                      |                        |                        |
| 18 | 1                                                                                                                                              | A rare case of juvenile hypertension: coexistence of type 2 multiple endocrine neoplasia -related bilateral pheochromocytoma and reninoma in a young patient with ACE gene polymorphism | Paragliola RM et al. | 26084817               | Paediatric individuals |
| 19 |                                                                                                                                                |                                                                                                                                                                                         |                      |                        |                        |
| 20 | 1                                                                                                                                              | Renin-angiotensin system polymorphisms and renal scarring                                                                                                                               | Pardo R et al.       | 12579398               | Paediatric individuals |
| 21 |                                                                                                                                                |                                                                                                                                                                                         |                      |                        |                        |
| 22 | 1                                                                                                                                              | Low renin-angiotensin system activity gene polymorphism and dysplasia associated with posterior urethral valves                                                                         | Peruzzi L et al.     | 16006956               | Paediatric individuals |
| 23 |                                                                                                                                                |                                                                                                                                                                                         |                      |                        |                        |
| 24 | 1                                                                                                                                              | Effect of angiotensin-converting enzyme gene insertion/deletion polymorphism on steroid resistance in Egyptian children with idiopathic nephrotic syndrome.                             | Saber-Ayad M et al.  | 20418353               | Paediatric individuals |
| 25 |                                                                                                                                                |                                                                                                                                                                                         |                      |                        |                        |
| 26 | 1                                                                                                                                              | ACE gene insertion/deletion polymorphism in childhood idiopathic nephrotic syndrome                                                                                                     | Serdaroglu E et al.  | 16208534               | Paediatric individuals |
| 27 |                                                                                                                                                |                                                                                                                                                                                         |                      |                        |                        |
| 28 | 1                                                                                                                                              | Effects of genetic polymorphisms of the renin-angiotensin system in children with nephrotic syndrome                                                                                    | Tabel Y et al.       | 16525944               | Paediatric individuals |
| 29 |                                                                                                                                                |                                                                                                                                                                                         |                      |                        |                        |
| 30 | 1                                                                                                                                              | Genetic risk factors in typical haemolytic uraemic syndrome                                                                                                                             | Taranta A et al.     | 19110485               | Paediatric individuals |
| 31 |                                                                                                                                                |                                                                                                                                                                                         |                      |                        |                        |
| 32 |                                                                                                                                                |                                                                                                                                                                                         |                      |                        |                        |
| 33 |                                                                                                                                                |                                                                                                                                                                                         |                      |                        |                        |
| 34 |                                                                                                                                                |                                                                                                                                                                                         |                      |                        |                        |
| 35 |                                                                                                                                                |                                                                                                                                                                                         |                      |                        |                        |
| 36 |                                                                                                                                                |                                                                                                                                                                                         |                      |                        |                        |
| 37 |                                                                                                                                                |                                                                                                                                                                                         |                      |                        |                        |
| 38 |                                                                                                                                                |                                                                                                                                                                                         |                      |                        |                        |
| 39 |                                                                                                                                                |                                                                                                                                                                                         |                      |                        |                        |
| 40 |                                                                                                                                                |                                                                                                                                                                                         |                      |                        |                        |
| 41 |                                                                                                                                                |                                                                                                                                                                                         |                      |                        |                        |
| 42 |                                                                                                                                                |                                                                                                                                                                                         |                      |                        |                        |
| 43 |                                                                                                                                                |                                                                                                                                                                                         |                      |                        |                        |
| 44 |                                                                                                                                                |                                                                                                                                                                                         |                      |                        |                        |
| 45 |                                                                                                                                                |                                                                                                                                                                                         |                      |                        |                        |
| 46 |                                                                                                                                                |                                                                                                                                                                                         |                      |                        |                        |

|    |   |                                                                                                                                                                                                                                                  |                       |          |                           |
|----|---|--------------------------------------------------------------------------------------------------------------------------------------------------------------------------------------------------------------------------------------------------|-----------------------|----------|---------------------------|
| 1  | 1 | The juxtaglomerular apparatus in Bartter's syndrome and related tubulopathies. An immunocytochemical and electron microscopic study.                                                                                                             | Taugner R et al.      | 3128915  | Paediatric individuals    |
| 2  | 1 | Mapping candidate regions and genes for congenital anomalies of the kidneys and urinary tract (CAKUT) by array-based comparative genomic hybridization                                                                                           | Weber S et al.        | 20605837 | Paediatric individuals    |
| 3  | 1 | Genetic polymorphism of the renin-angiotensin system on the development of primary vesicoureteral reflux                                                                                                                                         | Yim HE et al.         | 14764974 | Paediatric individuals    |
| 4  | 1 | The association of endothelial nitric oxide synthase gene single nucleotide polymorphisms with paediatric systemic lupus erythematosus                                                                                                           | Zhu J et al.          | 29465350 | Paediatric individuals    |
| 5  | 1 | Add-on angiotensin receptor blockade with maximized ACE inhibition                                                                                                                                                                               | Agarwal R             | 11380832 | Pharmaceutical drug focus |
| 6  | 1 | DPP-4 Inhibition on Top of Angiotensin Receptor Blockade Offers a New Therapeutic Approach for Diabetic Nephropathy                                                                                                                              | Alter ML et al.       | 23171828 | Pharmaceutical drug focus |
| 7  | 1 | Effects of losartan and enalapril on high-sensitivity C-reactive protein and total antioxidant in renal transplant recipients with renin-angiotensin system polymorphisms                                                                        | Argani H et al.       | 18261537 | Pharmaceutical drug focus |
| 8  | 1 | Losartan decreases plasma levels of TGF-beta 1 in transplant patients with chronic allograft nephropathy                                                                                                                                         | Campistol JM et al.   | 10432413 | Pharmaceutical drug focus |
| 9  | 1 | Captopril enhances transforming growth factor (TGF)-beta1 expression in peripheral blood mononuclear cells: a mechanism independent from angiotensin converting enzyme inhibition? A study in cyclosporine-treated kidney-transplanted patients. | Di Paolo S et al.     | 12499886 | Pharmaceutical drug focus |
| 10 | 1 | Thiazolidinediones and the renal and hormonal response to water immersion-induced volume expansion in type 2 diabetes mellitus                                                                                                                   | Goenka N et al.       | 18230694 | Pharmaceutical drug focus |
| 11 | 1 | The influence of renin-angiotensin system genotypes on the antiproteinuric response to high doses of olmesartan in non-diabetic protein uric nephropathies                                                                                       | Goyache-Goni B et al. | 24241364 | Pharmaceutical drug focus |
| 12 | 1 | Antiproteinuric effect of candesartan cilexetil in Japanese subjects with type 2 diabetes and nephropathy                                                                                                                                        | Haneda M et al.       | 15364166 | Pharmaceutical drug focus |

|   |                                                                                                                                                                 |                            |          |                                  |
|---|-----------------------------------------------------------------------------------------------------------------------------------------------------------------|----------------------------|----------|----------------------------------|
| 1 | Renal implications of angiotensin receptor blockers                                                                                                             | Hollenberg NK              | 11459212 | Pharmaceutical drug focus        |
| 1 | The influence of the ACE (I/D) polymorphism on systemic and renal vascular responses to angiotensins in normotensive, normoalbuminuric Type 1 diabetes mellitus | Luik PT et al.             | 12856080 | Pharmaceutical drug focus        |
| 1 | Application of Direct Renin Inhibition to Chronic Kidney Disease                                                                                                | Mende CW                   | 20490905 | Pharmaceutical drug focus        |
| 1 | Pentoxifylline for Renoprotection in Diabetic Nephropathy: the PREDIAN study. Rationale and basal results                                                       | Navarro-Gonzalez JF et al. | 21144773 | Pharmaceutical drug focus        |
| 1 | Renin-angiotensin system polymorphisms and hemoglobin level in renal allografts: A comparative study between losartan and enalapril                             | Noroozianavval M et al.    | 17524880 | Pharmaceutical drug focus        |
| 1 | Enalapril and losartan affect lipid peroxidation in renal transplant recipients with renin-angiotensin system polymorphisms                                     | Rashtchizadeh N et al.     | 17222813 | Pharmaceutical drug focus        |
| 2 | Relationship between the renin-angiotensin system genes and diabetic nephropathy in the Chinese.                                                                | Wu S et al.                | 11776100 | No data                          |
| 3 | Plasma renin and prorenin and renin gene variation in patients with insulin-dependent diabetes mellitus and nephropathy.                                        | Deinum J et al.            | 10462269 | < 3 populations reported per SNP |
| 3 | Renin-angiotensin-aldosterone system genotypes and haplotypes affect the susceptibility to nephropathy in type 2 diabetes patients                              | Mtiraoui N et al.          | 21421655 | < 3 populations reported per SNP |
| 3 | Chronic renal insufficiency among Asian Indians with type 2 diabetes: I. Role of RAAS gene polymorphisms                                                        | Prasad P et al.            | 16672053 | < 3 populations reported per SNP |
| 3 | Renin gene rs1464816 polymorphism contributes to chronic kidney disease progression in ADPKD.                                                                   | Ramanathan G et al.        | 26753721 | < 3 populations reported per SNP |
| 3 | M235T polymorphism in the AGT gene and A/G(I8-83) substitution in the REN gene correlate with end-stage renal disease                                           | Sarkar S et al.            | 25660845 | < 3 populations reported per SNP |

**Supplementary Table S4:** Data included in quantitative analysis for ACE

| Author                        | PMID/<br>WOS ID     | Ethnicity | SNP     | Cases      |     |                |                | Controls   |      |                |                |
|-------------------------------|---------------------|-----------|---------|------------|-----|----------------|----------------|------------|------|----------------|----------------|
|                               |                     |           |         | Definition | N   | I<br>Frequency | D<br>Frequency | Definition | N    | I<br>Frequency | D<br>Frequency |
| Anbazhagan K et al.           | 19520069            | SAS       | Ins/Del | CKD        | 118 | 124            | 112            | Healthy    | 98   | 99             | 97             |
| Chen WJ et al.                | 24907556            | SAS       | Ins/Del | CKD        | 233 | 314            | 152            | Healthy    | 449  | 617            | 281            |
| Nagamani S et al.             | None                | SAS       | Ins/Del | CKD        | 147 | 152            | 142            | Healthy    | 221  | 195            | 227            |
| Shanmuganathan R et al.       | 26440392            | SAS       | Ins/Del | CKD        | 30  | 10             | 50             | Healthy    | 30   | 55             | 5              |
| Ali A et al.                  | 21421653            | EAS       | Ins/Del | ESRD       | 190 | 219            | 161            | Healthy    | 190  | 262            | 118            |
| Kawada N et al.               | 00007188<br>0400005 | EAS       | Ins/Del | ESRD       | 216 | 280            | 152            | Healthy    | 208  | 264            | 152            |
| Su SL et al.                  | 24977181            | EAS       | Ins/Del | ESRD       | 647 | 792            | 502            | Healthy    | 644  | 859            | 429            |
| Tang FY et al.                | 18629615            | EAS       | Ins/Del | ESRD       | 153 | 100            | 206            | Healthy    | 148  | 138            | 158            |
| Wang AY et al.                | 12675870            | EAS       | Ins/Del | ESRD       | 246 | 316            | 176            | Healthy    | 183  | 230            | 136            |
| Yang HY et al.                | 23477970            | EAS       | Ins/Del | ESRD       | 683 | 833            | 533            | Healthy    | 653  | 867            | 439            |
| Buraczynska M et al.          | 16384824            | EUR       | Ins/Del | ESRD       | 745 | 688            | 802            | Healthy    | 520  | 492            | 548            |
| Dixit M et al.                | 12571380            | EUR       | Ins/Del | ESRD       | 26  | 32             | 20             | Healthy    | 22   | 17             | 27             |
| Losito A et al.               | 12454231            | EUR       | Ins/Del | ESRD       | 160 | 135            | 185            | Healthy    | 169  | 128            | 210            |
| McLaughlin KJ et al.          | 8901844             | EUR       | Ins/Del | ESRD       | 460 | 654            | 990            | Healthy    | 371  | 353            | 389            |
| Nicod J et al.                | 11918733            | EUR       | Ins/Del | ESRD       | 260 | 282            | 238            | Healthy    | 260  | 261            | 259            |
| Ortiz MA et al.               | 15012717            | EUR       | Ins/Del | ESRD       | 117 | 68             | 166            | Healthy    | 129  | 80             | 178            |
| Schmidt A et al.              | 8785402             | EUR       | Ins/Del | ESRD       | 106 | 105            | 107            | Healthy    | 95   | 80             | 110            |
| van der Sman-de Beer F et al. | 16221224            | EUR       | Ins/Del | ESRD       | 415 | 400            | 430            | Healthy    | 472  | 459            | 485            |
| Aucella F et al.              | 12748347            | EUR       | Ins/Del | ESRD       | 461 | 315            | 607            | Healthy    | 1307 | 916            | 1698           |
| Abuaisha AM et al.            | 00043304<br>9000003 | ME        | Ins/Del | ESRD       | 86  | 37             | 135            | Healthy    | 100  | 50             | 150            |
| Rahimi Z et al.               | 28447048            | ME        | Ins/Del | ESRD       | 99  | 64             | 126            | Healthy    | 117  | 89             | 145            |
| Zaare Nahandi et al.          | 28270648            | ME        | Ins/Del | ESRD       | 30  | 23             | 37             | Healthy    | 27   | 21             | 33             |

|    |                      |                     |     |         |                   |     |     |     |                                 |     |     |     |
|----|----------------------|---------------------|-----|---------|-------------------|-----|-----|-----|---------------------------------|-----|-----|-----|
| 1  |                      |                     |     |         |                   |     |     |     |                                 |     |     |     |
| 2  |                      |                     |     |         |                   |     |     |     |                                 |     |     |     |
| 3  |                      |                     |     |         |                   |     |     |     |                                 |     |     |     |
| 4  | Guo Y et al.         | 00038665<br>3400063 | EAS | Ins/Del | IgAN              | 45  | 54  | 36  | Healthy                         | 45  | 42  | 48  |
| 5  | Huang HD et al.      | 21163122            | EAS | Ins/Del | IgAN              | 130 | 155 | 105 | Healthy                         | 120 | 168 | 72  |
| 6  | Jung ES et al.       | 21150220            | EAS | Ins/Del | IgAN              | 261 | 298 | 224 | Healthy                         | 300 | 360 | 240 |
| 7  | Lau YK et al.        | 15153745            | EAS | Ins/Del | IgAN              | 118 | 154 | 82  | Healthy                         | 94  | 137 | 51  |
| 8  | Suzuki H et al.      | 15481848            | EAS | Ins/Del | IgAN              | 319 | 378 | 260 | Healthy                         | 270 | 328 | 212 |
| 9  | Yoon HJ et al.       | 12220450            | EAS | Ins/Del | IgAN              | 191 | 204 | 178 | Healthy                         | 233 | 268 | 198 |
| 10 | Yorioka T et al.     | 8529313             | EAS | Ins/Del | IgAN              | 48  | 67  | 29  | Healthy                         | 104 | 139 | 67  |
| 11 | Yoshida H et al.     | 7593601             | EAS | Ins/Del | IgAN              | 53  | 57  | 49  | Healthy                         | 46  | 62  | 30  |
| 12 | Burg M et al.*       | 9352153             | EUR | Ins/Del | IgAN              | 70  | 26  | 28  | Healthy                         | 60  | 60  | 60  |
| 13 | Drouet M et al.      | 12005241            | EUR | Ins/Del | IgAN              | 125 | 78  | 172 | Healthy                         | 83  | 54  | 100 |
| 14 | Harden PN et al.     | 7791440             | EUR | Ins/Del | IgAN              | 100 | 79  | 121 | Healthy                         | 98  | 76  | 120 |
| 15 | Pawlik M et al.*     | 23681285            | EUR | Ins/Del | IgAN              | 31  | 25  | 37  | Healthy                         | 187 | 180 | 194 |
| 16 | Pei Y et al.         | 9259580             | EUR | Ins/Del | IgAN              | 168 | 145 | 191 | Healthy                         | 100 | 91  | 109 |
| 17 | Schmidt S et al. (B) | 7485124             | EUR | Ins/Del | IgAN              | 204 | 168 | 240 | Healthy                         | 234 | 197 | 271 |
| 18 | Stratta P et al.     | 10352195            | EUR | Ins/Del | IgAN              | 81  | 62  | 100 | Healthy                         | 50  | 38  | 62  |
| 19 | Burg M et al.*       | 9352153             | EUR | Ins/Del | Primary<br>GN     | 46  | 44  | 48  | Healthy                         | 60  | 60  | 60  |
| 20 | Pawlik M et al.*     | 23681285            | EUR | Ins/Del | Primary<br>GN     | 109 | 101 | 117 | Healthy                         | 187 | 180 | 194 |
| 21 | Stratta P et al.     | 14767013            | EUR | Ins/Del | Primary<br>GN     | 117 | 96  | 138 | Organ<br>donors                 | 171 | 134 | 208 |
| 22 | Zsom M et al.        | 22111818            | EUR | Ins/Del | Primary<br>GN     | 73  | 62  | 84  | Healthy                         | 200 | 198 | 202 |
| 23 | Beige J et al.       | 9259361             | EUR | Ins/Del | RTx<br>recipients | 269 | 251 | 287 | Kidney<br>Donor                 | 269 | 244 | 294 |
| 24 | El-Essawy AB et al.  | 11926202            | EUR | Ins/Del | RTx<br>recipients | 294 | 246 | 342 | Healthy                         | 181 | 170 | 192 |
| 25 | Hueso M et al.       | 15284309            | EUR | Ins/Del | RTx<br>recipients | 180 |     |     | Healthy &<br>cadaveric<br>renal | 113 |     |     |
| 26 |                      |                     |     |         |                   |     | 122 | 238 |                                 | 96  |     | 130 |
| 27 |                      |                     |     |         |                   |     |     |     |                                 |     |     |     |
| 28 |                      |                     |     |         |                   |     |     |     |                                 |     |     |     |
| 29 |                      |                     |     |         |                   |     |     |     |                                 |     |     |     |
| 30 |                      |                     |     |         |                   |     |     |     |                                 |     |     |     |
| 31 |                      |                     |     |         |                   |     |     |     |                                 |     |     |     |
| 32 |                      |                     |     |         |                   |     |     |     |                                 |     |     |     |
| 33 |                      |                     |     |         |                   |     |     |     |                                 |     |     |     |
| 34 |                      |                     |     |         |                   |     |     |     |                                 |     |     |     |
| 35 |                      |                     |     |         |                   |     |     |     |                                 |     |     |     |
| 36 |                      |                     |     |         |                   |     |     |     |                                 |     |     |     |
| 37 |                      |                     |     |         |                   |     |     |     |                                 |     |     |     |
| 38 |                      |                     |     |         |                   |     |     |     |                                 |     |     |     |
| 39 |                      |                     |     |         |                   |     |     |     |                                 |     |     |     |
| 40 |                      |                     |     |         |                   |     |     |     |                                 |     |     |     |
| 41 |                      |                     |     |         |                   |     |     |     |                                 |     |     |     |
| 42 |                      |                     |     |         |                   |     |     |     |                                 |     |     |     |
| 43 |                      |                     |     |         |                   |     |     |     |                                 |     |     |     |
| 44 |                      |                     |     |         |                   |     |     |     |                                 |     |     |     |
| 45 |                      |                     |     |         |                   |     |     |     |                                 |     |     |     |
| 46 |                      |                     |     |         |                   |     |     |     |                                 |     |     |     |

|                        |                     |     |         |                |     |     |     | allograft donors |     |      |     |
|------------------------|---------------------|-----|---------|----------------|-----|-----|-----|------------------|-----|------|-----|
| Stratta P et al.       | 19034872            | EUR | Ins/Del | RTx recipients | 169 | 122 | 216 | Healthy          | 169 | 112  | 226 |
| Viklický O et al.      | 11239522            | EUR | Ins/Del | RTx recipients | 30  | 28  | 32  | Healthy          | 653 | 599  | 707 |
| Barnas U et al.        | 9084972             | EUR | Ins/Del | T1DN           | 63  | 45  | 55  | T1DM             | 59  | 51   | 29  |
| Chowdhury TA et al.    | 8877296             | EUR | Ins/Del | T1DN           | 242 | 204 | 280 | T1DM             | 166 | 143  | 189 |
| Currie D et al.        | 20854388            | EUR | Ins/Del | T1DN           | 718 | 603 | 777 | T1DM             | 749 | 696  | 764 |
| De Cosmo S et al.      | 10495473            | EUR | Ins/Del | T1DN           | 175 | 125 | 225 | T1DM             | 136 | 89   | 183 |
| Demurov LM et al.      | A1997XE9<br>8500008 | EUR | Ins/Del | T1DN           | 56  | 35  | 77  | T1DM             | 76  | 72   | 80  |
| Hadjadj S et al.       | 11181802            | EUR | Ins/Del | T1DN           | 6   | 4   | 8   | T1DM             | 251 | 208  | 294 |
| Hibberd ML et al.      | 9025006             | EUR | Ins/Del | T1DN           | 72  | 60  | 84  | T1DM             | 86  | 57   | 115 |
| Marre M et al.         | 8314010             | EUR | Ins/Del | T1DN           | 62  | 43  | 81  | T1DM             | 62  | 58   | 66  |
| Ringel J et al.*       | 9049480             | EUR | Ins/Del | T1DN           | 134 | 130 | 138 | T1DM             | 226 | 208  | 244 |
| Schmidt S et al. (A)   | 7783416             | EUR | Ins/Del | T1DN           | 114 | 86  | 142 | T1DM             | 133 | 101  | 165 |
| Shestakova MV et al.   | 00024241<br>0600010 | EUR | Ins/Del | T1DN           | 63  | 65  | 61  | T1DM             | 66  | 78   | 54  |
| Tarnow L et al.        | 7729604             | EUR | Ins/Del | T1DN           | 198 | 175 | 221 | T1DM             | 190 | 169  | 211 |
| van Ittersum FJ et al. | 10862638            | EUR | Ins/Del | T1DN           | 30  | 33  | 27  | T1DM             | 188 | 192  | 184 |
| Walder B et al.        | None                | EUR | Ins/Del | T1DN           | 55  | 49  | 61  | T1DM             | 44  | 40   | 48  |
| Fujisawa T et al.      | 7555560             | EAS | Ins/Del | T2DN           | 54  | 71  | 37  | T2DM             | 35  | 46   | 24  |
| Ha SK et al.           | 12722028            | EAS | Ins/Del | T2DN           | 140 | 132 | 148 | T2DM             | 99  | 123  | 75  |
| Hsieh MC et al.        | 10862639            | EAS | Ins/Del | T2DN           | 179 | 219 | 139 | T2DM             | 157 | 222  | 92  |
| Mizuri S et al.        | 7477652             | EAS | Ins/Del | T2DN           | 80  | 72  | 88  | T2DM             | 31  | 33   | 29  |
| Nakajima S et al.      | 8941475             | EAS | Ins/Del | T2DN           | 54  | 67  | 41  | T2DM             | 41  | 55   | 27  |
| Ohno T et al.          | 8596493             | EAS | Ins/Del | T2DN           | 25  | 28  | 22  | T2DM             | 53  | 81   | 25  |
| Shin Shin Y et al.     | 15331206            | EAS | Ins/Del | T2DN           | 82  | 112 | 52  | T2DM             | 59  | 70   | 48  |
| Thomas GN et al.       | 11200871            | EAS | Ins/Del | T2DN           | 51  | 72  | 30  | T2DM             | 255 | 346  | 164 |
| Wang M et al.          | 26973293            | EAS | Ins/Del | T2DN           | 106 | 78  | 56  | T2DM             | 741 | 1020 | 438 |
| Wu SH et al.           | 11776100            | EAS | Ins/Del | T2DN           | 71  | 75  | 67  | T2DM             | 41  | 58   | 24  |

|                       |                     |     |         |               |     |     |     |      |     |     |     |
|-----------------------|---------------------|-----|---------|---------------|-----|-----|-----|------|-----|-----|-----|
| Young RP et al.       | 9540028             | EAS | Ins/Del | T2DN          | 20  | 27  | 13  | T2DM | 54  | 72  | 36  |
| Dudley CR et al.      | 8587251             | EUR | Ins/Del | T2DN          | 163 | 246 | 288 | T2DM | 267 | 246 | 288 |
| Fradin S et al.       | 11938025            | EUR | Ins/Del | T2DN          | 39  | 94  | 142 | T2DM | 118 | 94  | 142 |
| Ng DP et al.          | 16936219            | EUR | Ins/Del | T2DN          | 291 | 147 | 187 | T2DM | 167 | 147 | 187 |
| Nikzamid A et al.     | 19502259            | EUR | Ins/Del | T2DN          | 48  | 159 | 131 | T2DM | 145 | 159 | 131 |
| Schmidt S et al. (B)  | 9269698             | EUR | Ins/Del | T2DN          | 311 | 278 | 416 | T2DM | 347 | 278 | 416 |
| Al-Harbi EM et al.    | 21207118            | ME  | Ins/Del | T2DN          | 110 | 63  | 157 | T2DM | 196 | 125 | 267 |
| Alharbi SA et al.     | 00041506<br>3100003 | ME  | Ins/Del | T2DN          | 61  | 31  | 91  | T2DM | 61  | 47  | 75  |
| Araz M et al.         | 11640993            | ME  | Ins/Del | T2DN          | 62  | 52  | 72  | T2DM | 123 | 103 | 143 |
| El-Baz R et al.       | 22554825            | ME  | Ins/Del | T2DN          | 102 | 66  | 138 | T2DM | 100 | 82  | 118 |
| Ergen HA et al.       | 15365253            | ME  | Ins/Del | T2DN          | 25  | 21  | 29  | T2DM | 50  | 31  | 69  |
| Eroglu Z et al.       | 18413162            | ME  | Ins/Del | T2DN          | 46  | 43  | 49  | T2DM | 56  | 50  | 62  |
| Felehgari V et al.    | 20830509            | ME  | Ins/Del | T2DN          | 68  | 42  | 94  | T2DM | 72  | 60  | 84  |
| Sancakdar E et al.    | 00036754<br>1400005 | ME  | Ins/Del | T2DN          | 194 | 180 | 208 | T2DM | 100 | 62  | 138 |
| Ahluwalia TS et al.   | 19108684            | SAS | Ins/Del | T2DN          | 240 | 152 | 328 | T2DM | 200 | 215 |     |
| Kumar R et al.        | 23846111            | SAS | Ins/Del | T2DN          | 407 | 448 | 366 | T2DM | 185 | 190 |     |
| Movva S et al.        | 17616353            | SAS | Ins/Del | T2DN          | 174 | 182 | 166 | T2DM | 175 | 222 |     |
| Naresh VV et al.      | 20535249            | SAS | Ins/Del | T2DN          | 30  | 19  | 41  | T2DM | 30  | 35  |     |
| Shaikh R et al.       | 00031205<br>3000001 | SAS | Ins/Del | T2DN          | 168 | 134 | 202 | T2DM | 296 | 394 |     |
| Vishwanathan V et al. | 11867868            | SAS | Ins/Del | T2DN          | 86  | 79  | 93  | T2DM | 23  | 28  |     |
| Doi Y et al.          | 8720609             | EAS | Ins/Del | T2DN-<br>ESRD | 100 | 115 | 85  | T2DM | 124 | 168 |     |
| Jayapalan JJ et al.   | 21031056            | EAS | Ins/Del | T2DN-<br>ESRD | 127 | 163 | 91  | T2DM | 81  | 93  |     |
| Lu M et al.           | 27633502            | EAS | Ins/Del | T2DN-<br>ESRD | 210 | 238 | 182 | T2DM | 222 | 307 |     |
| Park HC et al.        | 16385653            | EAS | Ins/Del | T2DN-<br>ESRD | 103 | 103 | 103 | T2DM | 88  | 111 |     |



|                      |          |     |         |           |     |     |     |      |     |     |  |
|----------------------|----------|-----|---------|-----------|-----|-----|-----|------|-----|-----|--|
| Taniwaki H et al.    | 11522715 | EAS | Ins/Del | T2DN-ESRD | 42  | 53  | 31  | T2DM | 69  | 88  |  |
| Grzeszczak W et al.  | 9727375  | EUR | Ins/Del | T2DN-ESRD | 127 | 128 | 126 | T2DM | 254 | 244 |  |
| Ringel J et al.*     | 9049480  | EUR | Ins/Del | T2DN-ESRD | 161 | 150 | 172 | T2DM | 140 | 141 |  |
| Schmidt S et al. (A) | 9075119  | EUR | Ins/Del | T2DN-ESRD | 61  | 29  | 93  | T2DM | 347 | 416 |  |

\*Burg M et al., Pawlik M et al., and Ringel J et al., are included twice as these articles contained two phenotypic comparisons

Abbreviations: EAS, East Asian; EUR, European; ME, Middle Eastern; SAS, South Asian; CKD, Chronic Kidney Disease; ESRD, End-Stage Renal Disease; IgAN, IgA Nephropathy; GN, Glomerulonephritis; RTx, Renal Transplant; T1DM, Type 1 Diabetes Mellitus; T1DN, Type 1 Diabetic Nephropathy; T2DM, Type 2 Diabetes Mellitus; T2DN, Type 2 Diabetic Nephropathy.

1  
2  
3  
4  
5  
6  
7  
8  
9  
10  
11  
12  
13  
14  
15  
16  
17  
18  
19  
20  
21  
22  
23  
24  
25  
26  
27  
28  
29  
30  
31  
32  
33  
34  
35  
36  
37  
38  
39  
40  
41  
42  
43  
44  
45  
46

**Supplementary Table S5:** Data included in quantitative analysis for *AGT*

| Author                 | PMID/<br>WOS ID     | Ethnicity | SNP   | Cases      |     |                       |                       | Controls   |     |                       |                       |
|------------------------|---------------------|-----------|-------|------------|-----|-----------------------|-----------------------|------------|-----|-----------------------|-----------------------|
|                        |                     |           |       | Definition | N   | T Allele<br>Frequency | C Allele<br>Frequency | Definition | N   | T Allele<br>Frequency | C Allele<br>Frequency |
| Beige J et al.         | 8856207             | EUR       | rs699 | ESRD       | 269 | 285                   | 253                   | Healthy    | 269 | 307                   | 229                   |
| Buraczynska M et al.   | 16384824            | EUR       | rs699 | ESRD       | 745 | 734                   | 756                   | Healthy    | 520 | 564                   | 476                   |
| Losito A et al.        | 12454231            | EUR       | rs699 | ESRD       | 160 | 165                   | 155                   | Healthy    | 169 | 190                   | 148                   |
| Lovati E et al.        | 11422735            | EUR       | rs699 | ESRD       | 260 | 299                   | 221                   | Healthy    | 327 | 393                   | 261                   |
| Doria A et al.         | 8621207             | EUR       | rs699 | T1DN       | 139 | 158                   | 120                   | T1DM       | 75  | 96                    | 54                    |
| Fogarty DG et al.      | 8772723             | EUR       | rs699 | T1DN       | 95  | 114                   | 76                    | T1DM       | 100 | 129                   | 71                    |
| Möllsten A et al.      | 18413189            | EUR       | rs699 | T1DN       | 73  | 62                    | 34                    | T1DM       | 197 | 220                   | 174                   |
| Ringel J et al.        | 9049480             | EUR       | rs699 | T1DN       | 134 | 145                   | 123                   | T1DM       | 226 | 257                   | 195                   |
| Schmidt S et al.*      | 8918618             | EUR       | rs699 | T1DN       | 108 | 121                   | 95                    | T1DM       | 120 | 132                   | 108                   |
| van Ittersum FJ et al. | 10862638            | EUR       | rs699 | T1DN       | 30  | 31                    | 29                    | T1DM       | 188 | 238                   | 138                   |
| Walder B et al.        | None                | EUR       | rs699 | T1DN       | 55  | 60                    | 50                    | T1DM       | 44  | 63                    | 25                    |
| Ohno T et al.          | 8596493             | EAS       | rs699 | T2DN       | 25  | 16                    | 34                    | T2DM       | 53  | 25                    | 81                    |
| Oue T et al.           | 10580616            | EAS       | rs699 | T2DN       | 27  | 6                     | 36                    | T2DM       | 40  | 13                    | 47                    |
| Thomas GN et al.       | 11200871            | EAS       | rs699 | T2DN       | 51  | 18                    | 84                    | T2DM       | 255 | 79                    | 431                   |
| Wang M et al.          | 26973293            | EAS       | rs699 | T2DN       | 189 | 19                    | 175                   | T2DM       | 473 | 154                   | 792                   |
| Wu SH et al.           | 11776100            | EAS       | rs699 | T2DN       | 71  | 21                    | 121                   | T2DM       | 41  | 26                    | 56                    |
| Young RP et al.        | 9540028             | EAS       | rs699 | T2DN       | 20  | 4                     | 36                    | T2DM       | 54  | 25                    | 83                    |
| Fradin S et al.        | 11938025            | EUR       | rs699 | T2DN       | 39  | 45                    | 33                    | T2DM       | 118 | 139                   | 97                    |
| Freire MB et al.       | 9535411             | EUR       | rs699 | T2DN       | 117 | 134                   | 96                    | T2DM       | 125 | 148                   | 88                    |
| Makuc J et al.         | 28488548            | EUR       | rs699 | T2DN       | 276 | 294                   | 258                   | T2DM       | 375 | 394                   | 356                   |
| Schmidt S et al.*      | 8918618             | EUR       | rs699 | T2DN       | 127 | 149                   | 105                   | T2DM       | 107 | 117                   | 97                    |
| Zychma MJ et al.       | 11096141            | EUR       | rs699 | T2DN       | 127 | 133                   | 121                   | T2DM       | 243 | 242                   | 244                   |
| Eroglu Z et al.        | 18413162            | ME        | rs699 | T2DN       | 46  | 48                    | 44                    | T2DM       | 56  | 62                    | 50                    |
| Reis KA et al.         | 21500980            | ME        | rs699 | T2DN       | 108 | 114                   | 102                   | T2DM       | 111 | 89                    | 133                   |
| Sancakdar E et al.     | 000367541<br>400005 | ME        | rs699 | T2DN       | 194 | 189                   | 199                   | T2DM       | 100 | 95                    | 105                   |

1  
2  
3  
4  
5  
6  
7  
8  
9  
10  
11  
12  
13  
14  
15  
16  
17  
18  
19  
20  
21  
22  
23  
24  
25  
26  
27  
28  
29  
30  
31  
32  
33  
34  
35  
36  
37  
38  
39  
40  
41  
42  
43  
44  
45  
46

|                 |                     |     |       |      |     |     |      |         |     |     |      |
|-----------------|---------------------|-----|-------|------|-----|-----|------|---------|-----|-----|------|
| Gao J et al.    | 26588355            | EAS | rs699 | IgAN | 351 | 144 | 556  | Healthy | 310 | 125 | 495  |
| Guo Y et al.    | 000386653<br>400063 | EAS | rs699 | IgAN | 45  | 19  | 71   | Healthy | 45  | 16  | 74   |
| Huang HD et al. | 21163122            | EAS | rs699 | IgAN | 130 | 35  | 225  | Healthy | 120 | 40  | 200  |
| Kim SM et al.   | 19729965            | EAS | rs699 | IgAN | 238 | 89  | 387  | Healthy | 300 | 115 | 485  |
| Lau YK et al.   | 15153745            | EAS | rs699 | IgAN | 118 | 27  | 209  | Healthy | 94  | 31  | 157  |
| Kawada N et al. | 000071880<br>400005 | EAS | rs699 | ESRD | 216 | 91  | 333  | Healthy | 208 | 64  | 340  |
| Su SL et al.    | 29296205            | EAS | rs699 | ESRD | 634 | 194 | 1074 | Healthy | 739 | 279 | 1478 |
| Wang AY et al.  | 12675870            | EAS | rs699 | ESRD | 246 | 76  | 416  | Healthy | 183 | 64  | 302  |

\*Schmidt S et al., is included twice as the article contained two phenotypic comparisons.

Abbreviations: EAS, East Asian; EUR, European; ME, Middle Eastern; ESRD, End-Stage Renal Disease; IgAN, IgA Nephropathy; T1DM, Type 1 Diabetes Mellitus; T1DN, Type 1 Diabetic Nephropathy; T2DM, Type 2 Diabetes Mellitus; T2DN, Type 2 Diabetic Nephropathy.

**Supplementary Table S6:** Data included in quantitative analysis for *AGTR1*

| Author                 | PMID     | Ethnicity | SNP    | Definition | Cases |                    |                    | Controls   |     |                    |                    |
|------------------------|----------|-----------|--------|------------|-------|--------------------|--------------------|------------|-----|--------------------|--------------------|
|                        |          |           |        |            | N     | A Allele Frequency | C Allele Frequency | Definition | N   | A Allele Frequency | C Allele Frequency |
| Gao J et al.           | 26588355 | EAS       | rs5186 | IgAN       | 351   | 659                | 43                 | Healthy    | 310 | 577                | 43                 |
| Huang HD et al.        | 21163122 | EAS       | rs5186 | IgAN       | 130   | 243                | 17                 | Healthy    | 120 | 220                | 20                 |
| Kim SM et al.          | 19729965 | EAS       | rs5186 | IgAN       | 238   | 452                | 24                 | Healthy    | 300 | 576                | 24                 |
| Lau YK et al.          | 15153745 | EAS       | rs5186 | IgAN       | 118   | 227                | 9                  | Healthy    | 94  | 178                | 10                 |
| Currie D et al.        | 20854388 | EUR       | rs5186 | T1DN       | 718   | 1029               | 385                | T1DM       | 749 | 1052               | 418                |
| Doria A et al.         | 9389421  | EUR       | rs5186 | T1DN       | 73    | 99                 | 47                 | T1DM       | 79  | 119                | 39                 |
| Möllsten A et al.      | 18413189 | EUR       | rs5186 | T1DN       | 72    | 78                 | 18                 | T1DM       | 197 | 290                | 104                |
| Savage DA et al.       | 10328465 | EUR       | rs5186 | T1DN       | 95    | 136                | 54                 | T1DM       | 97  | 137                | 57                 |
| Tarnow L et al.        | 8671962  | EUR       | rs5186 | T1DN       | 198   | 287                | 109                | T1DM       | 190 | 274                | 106                |
| van Ittersum FJ et al. | 10862638 | EUR       | rs5186 | T1DN       | 30    | 47                 | 13                 | T1DM       | 188 | 238                | 138                |
| Thomas GN et al.       | 11200871 | EAS       | rs5186 | T2DN       | 51    | 99                 | 3                  | T2DM       | 255 | 483                | 27                 |
| Wu SH et al.           | 11776100 | EAS       | rs5186 | T2DN       | 71    | 127                | 15                 | T2DM       | 41  | 74                 | 8                  |
| Young RP et al.        | 9540028  | EAS       | rs5186 | T2DN       | 20    | 38                 | 2                  | T2DM       | 54  | 103                | 5                  |
| Ahluwalia TS et al.    | 19108684 | SAS       | rs5186 | T2DN       | 240   | 320                | 160                | T2DM       | 255 | 381                | 129                |
| Prasad P et al.        | 16672053 | SAS       | rs5186 | T2DN       | 196   | 360                | 26                 | T2DM       | 225 | 417                | 33                 |
| Shah VN et al.         | 23081748 | SAS       | rs5186 | T2DN       | 596   | 789                | 403                | T2DM       | 566 | 840                | 282                |

Abbreviations: EAS, East Asian; EUR, European; SAS, South Asian; IgAN, IgA Nephropathy; T1DM, Type 1 Diabetes Mellitus; T1DN, Type 1 Diabetic Nephropathy; T2DM, Type 2 Diabetes Mellitus; T2DN, Type 2 Diabetic Nephropathy.

**Supplementary Table S7.** Included studies not complying with Hardy Weinberg equilibrium in cases or controls

| Gene               | Author                  | PMID/<br>WODS ID | Ethnicity | SNP       | Cases      |                             | Controls   |                             |
|--------------------|-------------------------|------------------|-----------|-----------|------------|-----------------------------|------------|-----------------------------|
|                    |                         |                  |           |           | Definition | P value (where significant) | Definition | P value (where significant) |
| ACE                | Jung ES et al.          | 21150220         | EAS       | Ins/Del   | IgAN       |                             | Healthy    | 0.016                       |
|                    | Shanmuganathan R et al. | 26440392         | SAS       | Ins/Del   | CKD        | 1.31x10 <sup>-04</sup>      | Healthy    | 1.9x10 <sup>-05</sup>       |
|                    | Tang FY et al.          | 18629615         | EAS       | Ins/Del   | ESRD       | 1.8x10 <sup>-05</sup>       | Healthy    | 1x10 <sup>-06</sup>         |
|                    | Nicod J et al.          | 11918733         | EUR       | Ins/Del   | ESRD       | 0.0008                      | Healthy    | 0.004                       |
|                    | McLaughlin KJ et al.    | 8901844          | EUR       | Ins/Del   | ESRD       | 0.04                        | Healthy    |                             |
|                    | Yorioka T et al.        | 8529313          | EAS       | Ins/Del   | IgAN       | 0.013                       | Healthy    |                             |
|                    | Yoshida H et al.        | 7593601          | EAS       | Ins/Del   | IgAN       | 0.01                        | Healthy    |                             |
|                    | Yoon HJ et al.          | 12220450         | EAS       | Ins/Del   | IgAN       | 0.002                       | Healthy    |                             |
|                    | Schmidt S et al.        | 7485124          | EUR       | Ins/Del   | IgAN       | 0.007                       | Healthy    |                             |
|                    | Suzuki H et al.         | 15481848         | EAS       | Ins/Del   | IgAN       | 0.036                       | Healthy    | 0.004                       |
|                    | Zsom M et al.           | 22111818         | EUR       | Ins/Del   | Primary GN | 0.005                       | Healthy    |                             |
|                    | Currie D et al.         | 20854388         | EUR       | Ins/Del   | T1DN       |                             | T1DM       | 0.005                       |
|                    | Ringel J et al.         | 9049480          | EUR       | Ins/Del   | T1DN       |                             | T1DM       | 0.018                       |
|                    | Tarnow L et al.         | 7729604          | EUR       | Ins/Del   | T1DN       |                             | T1DM       | 0.013                       |
|                    | Schmidt S et al.        | 7783416          | EUR       | Ins/Del   | T1DN       | 0.002                       | T1DM       |                             |
|                    | Mizuiru S et al.        | 7477652          | EAS       | Ins/Del   | T2DN       | 0.019                       | T2DM       |                             |
|                    | Hsieh MC et al.         | 10862639         | EAS       | Ins/Del   | T2DN       | 4.2x10 <sup>-05</sup>       | T2DM       | 0.004                       |
|                    | Ha SK et al.            | 12722028         | EAS       | Ins/Del   | T2DN       |                             | T2DM       | 0.026                       |
|                    | Schmidt S et al.        | 9269698          | EUR       | Ins/Del   | T2DN       | 0.0147                      | T2DM       |                             |
|                    | El-Baz R et al.         | 22554825         | ME        | Ins/Del   | T2DN       | 0.0025                      | T2DM       | 1x10 <sup>-06</sup>         |
| Sancakdar E et al. | 000367541400005         | ME               | Ins/Del   | T2DN      | 0.0076     | T2DM                        | 0.003      |                             |
| Kumar R et al.     | 23846111                | SAS              | Ins/Del   | T2DN      | 0.0016     | T2DM                        | 0.0003     |                             |
| Park HC et al.     | 16385653                | EAS              | Ins/Del   | T2DN-ESRD |            | T2DM                        | 0.022      |                             |
| AGT                | Fogarty DG et al.       | 8772723          | EUR       | rs699     | T1DN       |                             | T1DM       | 0.044                       |
|                    | Wu SH et al.            | 11776100         | EAS       | rs699     | T2DN       | 0.0008                      | T2DM       |                             |
|                    | Freire MB et al.        | 9535411          | EUR       | rs699     | T2DN       | 0.022                       | T2DM       |                             |
|                    | Reis KA et al.          | 21500980         | ME        | rs699     | T2DN       | 0.006                       | T2DM       |                             |

|              |                     |          |     |        |      |       |         |                       |
|--------------|---------------------|----------|-----|--------|------|-------|---------|-----------------------|
|              | Fradin S et al.     | 11938025 | EUR | rs699  | T2DN | 0.008 | T2DM    |                       |
|              | Su SL et al.        | 29296205 | EAS | rs699  | ESRD |       | Healthy | 0.010                 |
| <i>AGTR1</i> | Ahluwalia TS et al. | 19108684 | SAS | rs5186 | T2DN |       | T2DM    | 0.0002                |
|              | Shah VN et al.      | 23081748 | SAS | rs5186 | T2DN |       | T2DM    | 4.2x10 <sup>-08</sup> |
|              | Lau YK et al.       | 15153745 | EAS | rs5186 | IgAN | 0.038 | Healthy |                       |
|              | Möllsten A et al.   | 8856207  | EUR | rs5186 | T1DN | 0.029 | T1DM    |                       |

Abbreviations: EAS, East Asian; EUR, European; ME, Middle Eastern; SAS, South Asian; CKD, Chronic Kidney Disease; ESRD, End-Stage Renal Disease; GN, Glomerulonephritis; IgAN, IgA Nephropathy; T1DM, Type 1 Diabetes Mellitus; T1DN, Type 1 Diabetic Nephropathy; T2DM, Type 2 Diabetes Mellitus; T2DN, Type 2 Diabetic Nephropathy.

**Supplementary Data File S1.** Allele frequencies for all control populations which consisted of healthy individuals alongside the dbSNP reported frequencies

**AGT rs699 – East Asian populations included in meta-analysis**

- IgAN vs healthy controls
  - Five populations included in analysis
  - Allele frequencies are as follows:

| <b>AGT</b> | <b>Study</b>        | <b>Population</b> | <b>Sample Size</b> | <b>Reference allele frequency</b> | <b>Alternative allele frequency</b> |
|------------|---------------------|-------------------|--------------------|-----------------------------------|-------------------------------------|
| rs699      | Gao J et al.(49)    | East Asian        | 538                | A=0.202                           | G=0.798                             |
| rs699      | Guo Y et al.(77)    | East Asian        | 1265               | A=0.178                           | G=0.822                             |
| rs699      | Huang HD et al.(50) | East Asian        | 329                | A=0.167                           | G=0.833                             |
| rs699      | Kim SM et al.(51)   | East Asian        | 587                | A=0.192                           | G=0.808                             |
| rs699      | Lau YK et al.(25)   | East Asian        | 212                | A=0.165                           | G=0.835                             |

- ESRD vs healthy controls
  - Three populations included in analysis
  - Allele frequencies:

| <b>AGT</b> | <b>Study</b>        | <b>Population</b> | <b>Sample Size</b> | <b>Reference allele frequency</b> | <b>Alternative allele frequency</b> |
|------------|---------------------|-------------------|--------------------|-----------------------------------|-------------------------------------|
| rs699      | Kawada N et al.(22) | East Asian        | 424                | A=0.158                           | G=0.841                             |
| rs699      | Su SL et al.(157)   | East Asian        | 1373               | A=0.189                           | G=0.811                             |
| rs699      | Wang AY et al.(63)  | East Asian        | 429                | A=0.175                           | G=0.825                             |

- dbSNP frequencies:

| <b>AGT</b> | <b>Study</b>     | <b>Population</b> | <b>Sample Size</b> | <b>Reference allele frequency</b> | <b>Alternative allele frequency</b> |
|------------|------------------|-------------------|--------------------|-----------------------------------|-------------------------------------|
| rs699      | gnomAD - Genomes | East Asian        | 1622               | A=0.156                           | G=0.844                             |
| rs699      | 1000Genomes      | East Asian        | 1008               | A=0.147                           | G=0.853                             |

- Chi-square calculations for reference allele frequency comparing meta-analysed data with dbSNP data:

| <b>Group</b>                                                           | <b>gnomAD - Genomes</b> | <b>1000Genomes</b> |
|------------------------------------------------------------------------|-------------------------|--------------------|
| <b>AGT rs699 – East Asian populations<br/>IgAN vs Healthy Controls</b> | 0.999516                | 0.999582           |
| <b>AGT rs699 – East Asian populations<br/>ESRD vs Healthy Controls</b> | 0.984359                | 0.985654           |

**AGT rs699 – European populations included in meta-analysis**

- ESRD vs healthy controls
  - Four populations included in analysis
  - Allele frequencies are as follows:

| <b>AGT</b>   | <b>Study</b>             | <b>Population</b> | <b>Sample Size</b> | <b>Reference allele frequency</b> | <b>Alternative allele frequency</b> |
|--------------|--------------------------|-------------------|--------------------|-----------------------------------|-------------------------------------|
| <b>rs699</b> | Beige J et al. (146)     | European          | 538                | A=0.573                           | G=0.427                             |
| <b>rs699</b> | Buraczynska M et al.(65) | European          | 1265               | A=0.542                           | G=0.458                             |
| <b>rs699</b> | Losito A et al.(67)      | European          | 329                | A=0.562                           | G=0.438                             |
| <b>rs699</b> | Lovati E et al.(147)     | European          | 587                | A=0.601                           | G=0.399                             |

- dbSNP frequencies:

| <b>AGT</b>   | <b>Study</b>     | <b>Population</b> | <b>Sample Size</b> | <b>Reference allele frequency</b> | <b>Alternative allele frequency</b> |
|--------------|------------------|-------------------|--------------------|-----------------------------------|-------------------------------------|
| <b>rs699</b> | gnomAD - Genomes | European          | 18440              | A=0.5616                          | G=0.4384                            |
| <b>rs699</b> | gnomAD - Exomes  | European          | 133914             | A=0.57665                         | G=0.42335                           |
| <b>rs699</b> | 1000Genomes      | European          | 1006               | A=0.588                           | G=0.412                             |
| <b>rs699</b> | ExAC             | European          | 73258              | A=0.5747                          | G=0.4253                            |

- Chi-square calculations for alternative allele frequency comparing meta-analysed data with dbSNP data:

| <b>Group</b>                                                     | <b>gnomAD - Genomes</b> | <b>gnomAD - Exomes</b> | <b>1000Genomes</b> | <b>ExAC</b> |
|------------------------------------------------------------------|-------------------------|------------------------|--------------------|-------------|
| <b>AGT rs699 – European populations ESRD vs Healthy Controls</b> | 0.979214                | 0.980521               | 0.981483           | 0.980354    |



**AGTR1 rs5186 – East Asian populations included in meta-analysis**

- IgAN vs healthy controls
  - Four populations included in analysis
  - Allele frequencies are as follows:

| <b>AGTR1</b>  | <b>Study</b>        | <b>Population</b> | <b>Sample Size</b> | <b>Reference allele frequency</b> | <b>Alternative allele frequency</b> |
|---------------|---------------------|-------------------|--------------------|-----------------------------------|-------------------------------------|
| <b>rs5186</b> | Gao J et al.(49)    | East Asian        | 661                | A=0.931                           | G=0.069                             |
| <b>rs5186</b> | Huang HD et al.(50) | East Asian        | 250                | A=0.917                           | G=0.083                             |
| <b>rs5186</b> | Kim SM et al.(51)   | East Asian        | 538                | A=0.960                           | G=0.04                              |
| <b>rs5186</b> | Lau YK et al.(25)   | East Asian        | 212                | A=0.947                           | G=0.053                             |

- dbSNP frequencies:

| <b>AGTR1</b>  | <b>Study</b>     | <b>Population</b> | <b>Sample Size</b> | <b>Reference allele frequency</b> | <b>Alternative allele frequency</b> |
|---------------|------------------|-------------------|--------------------|-----------------------------------|-------------------------------------|
| <b>rs5186</b> | gnomAD - Genomes | East Asian        | 1618               | A=0.944                           | C=0.056                             |
| <b>rs5186</b> | 1000Genomes      | East Asian        | 1008               | A=0.940                           | C=0.060                             |

- Chi-square calculations for alternative allele frequency comparing meta-analysed data with dbSNP data:

| <b>Group</b>                                                              | <b>gnomAD - Genomes</b> | <b>1000Genomes</b> |
|---------------------------------------------------------------------------|-------------------------|--------------------|
| <b>AGTR1 rs5186 – East Asian populations<br/>IgAN vs Healthy Controls</b> | 0.999615                | 0.999559           |

1  
2  
3 **ACE insertion/deletion – European, East Asian, South Asian and Middle Eastern populations**  
4 **included in meta-analysis**  
5

- 6 • Four reported rs numbers for this SNP rs numbers (rs13447447, rs1799752, rs4340,  
7 rs4646994) were not found in dbSNP and therefore no reported allele frequencies  
8 were available for comparison.  
9

10  
11  
12  
13  
14  
15  
16  
17  
18  
19  
20  
21  
22  
23  
24  
25  
26  
27  
28  
29  
30  
31  
32  
33  
34  
35  
36  
37  
38  
39  
40  
41  
42  
43  
44  
45  
46  
47  
48  
49  
50  
51  
52  
53  
54  
55  
56  
57  
58  
59  
60

For peer review only

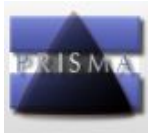

## PRISMA 2009 Flow Diagram

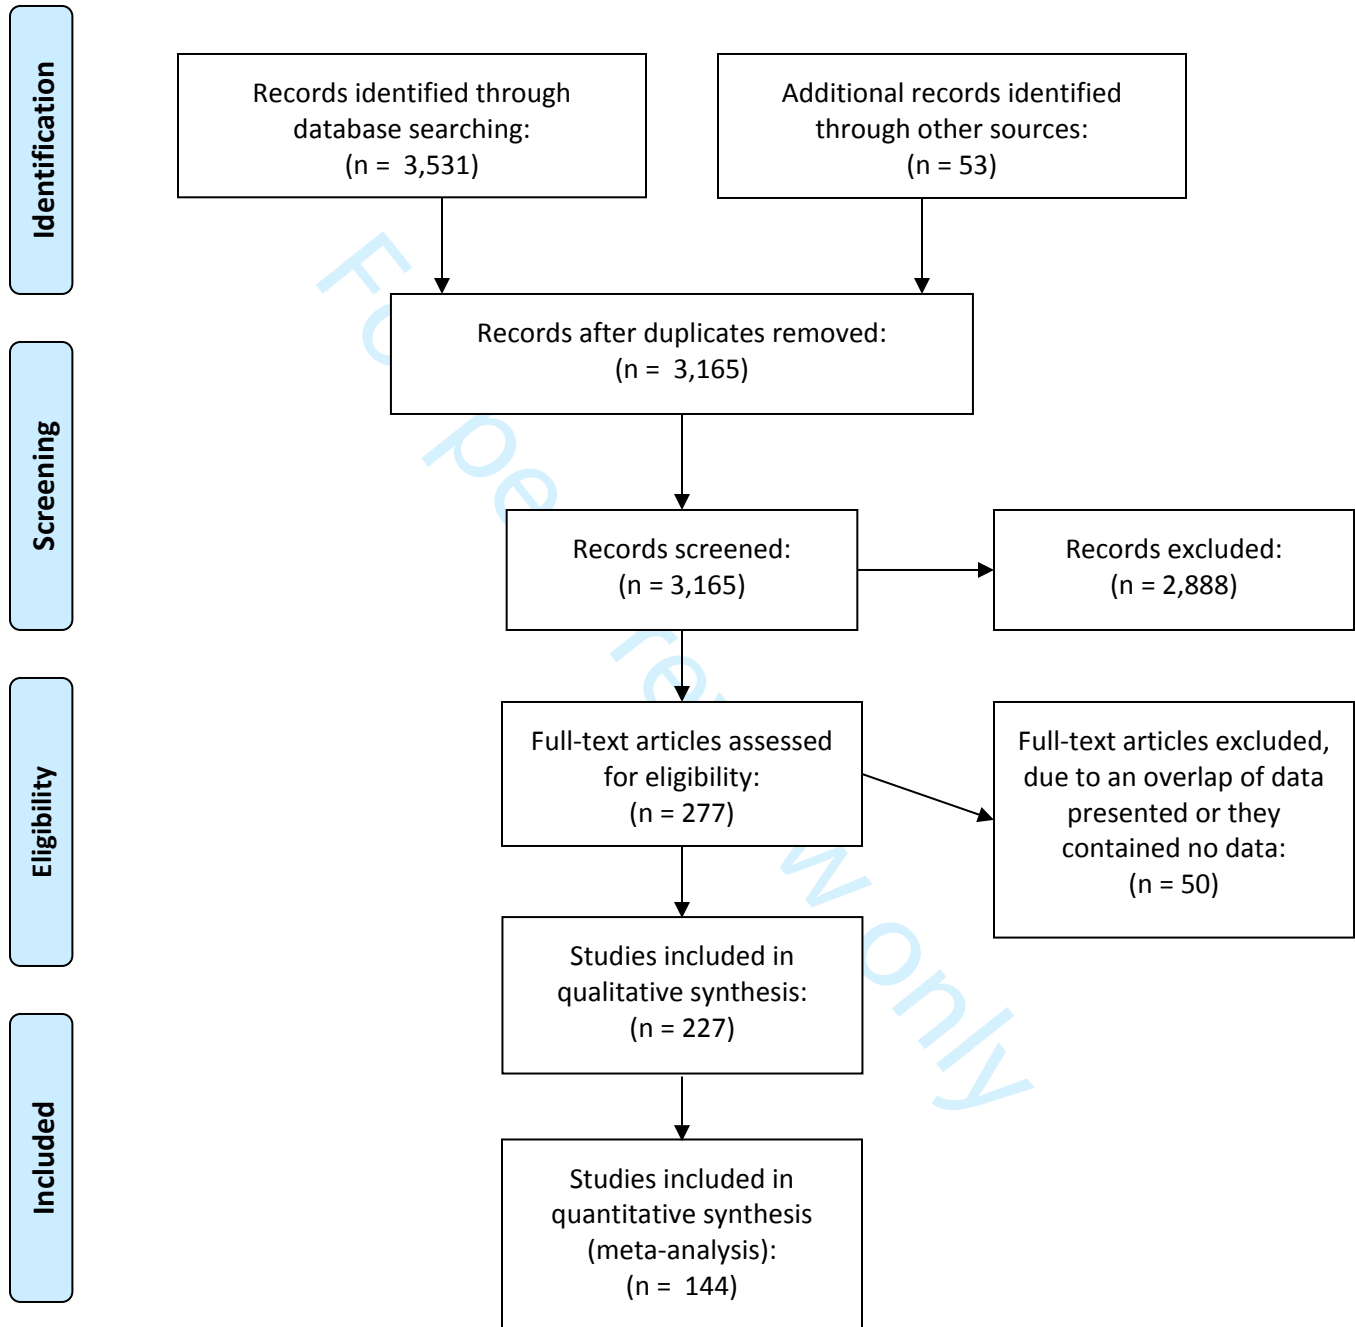

From: Moher D, Liberati A, Tetzlaff J, Altman DG, The PRISMA Group (2009). Preferred Reporting Items for Systematic Reviews and Meta-Analyses: The PRISMA Statement. PLoS Med 6(7): e1000097. doi:10.1371/journal.pmed1000097

For more information, visit [www.prisma-statement.org](http://www.prisma-statement.org).

For peer review only - <http://bmjopen.bmj.com/site/about/guidelines.xhtml>

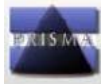

# PRISMA 2009 Checklist

1  
2  
3  
4  
5  
6  
7  
8  
9  
10  
11  
12  
13  
14  
15  
16  
17  
18  
19  
20  
21  
22  
23  
24  
25  
26  
27  
28  
29  
30  
31  
32  
33  
34  
35  
36  
37  
38  
39  
40  
41  
42  
43  
44  
45  
46  
47

| Section/topic                      | #  | Checklist item                                                                                                                                                                                                                                                                                              | Reported on page # |
|------------------------------------|----|-------------------------------------------------------------------------------------------------------------------------------------------------------------------------------------------------------------------------------------------------------------------------------------------------------------|--------------------|
| <b>TITLE</b>                       |    |                                                                                                                                                                                                                                                                                                             |                    |
| Title                              | 1  | Identify the report as a systematic review, meta-analysis, or both.                                                                                                                                                                                                                                         | 1                  |
| <b>ABSTRACT</b>                    |    |                                                                                                                                                                                                                                                                                                             |                    |
| Structured summary                 | 2  | Provide a structured summary including, as applicable: background; objectives; data sources; study eligibility criteria, participants, and interventions; study appraisal and synthesis methods; results; limitations; conclusions and implications of key findings; systematic review registration number. | 1&2                |
| <b>INTRODUCTION</b>                |    |                                                                                                                                                                                                                                                                                                             |                    |
| Rationale                          | 3  | Describe the rationale for the review in the context of what is already known.                                                                                                                                                                                                                              | 2&3                |
| Objectives                         | 4  | Provide an explicit statement of questions being addressed with reference to participants, interventions, comparisons, outcomes, and study design (PICOS).                                                                                                                                                  | 1-3                |
| <b>METHODS</b>                     |    |                                                                                                                                                                                                                                                                                                             |                    |
| Protocol and registration          | 5  | Indicate if a review protocol exists, if and where it can be accessed (e.g., Web address), and, if available, provide registration information including registration number.                                                                                                                               | 5                  |
| Eligibility criteria               | 6  | Specify study characteristics (e.g., PICOS, length of follow-up) and report characteristics (e.g., years considered, language, publication status) used as criteria for eligibility, giving rationale.                                                                                                      | 4                  |
| Information sources                | 7  | Describe all information sources (e.g., databases with dates of coverage, contact with study authors to identify additional studies) in the search and date last searched.                                                                                                                                  | 3-5                |
| Search                             | 8  | Present full electronic search strategy for at least one database, including any limits used, such that it could be repeated.                                                                                                                                                                               | 3 and STS1         |
| Study selection                    | 9  | State the process for selecting studies (i.e., screening, eligibility, included in systematic review, and, if applicable, included in the meta-analysis).                                                                                                                                                   | 3-4                |
| Data collection process            | 10 | Describe method of data extraction from reports (e.g., piloted forms, independently, in duplicate) and any processes for obtaining and confirming data from investigators.                                                                                                                                  | 4-5                |
| Data items                         | 11 | List and define all variables for which data were sought (e.g., PICOS, funding sources) and any assumptions and simplifications made.                                                                                                                                                                       | 4-5                |
| Risk of bias in individual studies | 12 | Describe methods used for assessing risk of bias of individual studies (including specification of whether this was done at the study or outcome level), and how this information is to be used in any data synthesis.                                                                                      | 4-5                |
| Summary measures                   | 13 | State the principal summary measures (e.g., risk ratio, difference in means).                                                                                                                                                                                                                               | 4-5                |
| Synthesis of results               | 14 | Describe the methods of handling data and combining results of studies, if done, including measures of consistency (e.g., I <sup>2</sup> ) for each meta-analysis.                                                                                                                                          | 4-5                |

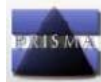

# PRISMA 2009 Checklist

Page 1 of 2

| Section/topic                 | #  | Checklist item                                                                                                                                                                                           | Reported on page # |
|-------------------------------|----|----------------------------------------------------------------------------------------------------------------------------------------------------------------------------------------------------------|--------------------|
| Risk of bias across studies   | 15 | Specify any assessment of risk of bias that may affect the cumulative evidence (e.g., publication bias, selective reporting within studies).                                                             | 4-5                |
| Additional analyses           | 16 | Describe methods of additional analyses (e.g., sensitivity or subgroup analyses, meta-regression), if done, indicating which were pre-specified.                                                         | 5                  |
| <b>RESULTS</b>                |    |                                                                                                                                                                                                          |                    |
| Study selection               | 17 | Give numbers of studies screened, assessed for eligibility, and included in the review, with reasons for exclusions at each stage, ideally with a flow diagram.                                          | 5 and SFS1         |
| Study characteristics         | 18 | For each study, present characteristics for which data were extracted (e.g., study size, PICOS, follow-up period) and provide the citations.                                                             | 4&5                |
| Risk of bias within studies   | 19 | Present data on risk of bias of each study and, if available, any outcome level assessment (see item 12).                                                                                                | 4-6                |
| Results of individual studies | 20 | For all outcomes considered (benefits or harms), present, for each study: (a) simple summary data for each intervention group (b) effect estimates and confidence intervals, ideally with a forest plot. | 7&8                |
| Synthesis of results          | 21 | Present results of each meta-analysis done, including confidence intervals and measures of consistency.                                                                                                  | 7&8                |
| Risk of bias across studies   | 22 | Present results of any assessment of risk of bias across studies (see Item 15).                                                                                                                          | 7&8                |
| Additional analysis           | 23 | Give results of additional analyses, if done (e.g., sensitivity or subgroup analyses, meta-regression [see Item 16]).                                                                                    | NA                 |
| <b>DISCUSSION</b>             |    |                                                                                                                                                                                                          |                    |
| Summary of evidence           | 24 | Summarize the main findings including the strength of evidence for each main outcome; consider their relevance to key groups (e.g., healthcare providers, users, and policy makers).                     | 7-10               |
| Limitations                   | 25 | Discuss limitations at study and outcome level (e.g., risk of bias), and at review-level (e.g., incomplete retrieval of identified research, reporting bias).                                            | 2, 9&10            |
| Conclusions                   | 26 | Provide a general interpretation of the results in the context of other evidence, and implications for future research.                                                                                  | 7-10               |
| <b>FUNDING</b>                |    |                                                                                                                                                                                                          |                    |
| Funding                       | 27 | Describe sources of funding for the systematic review and other support (e.g., supply of data); role of funders for the systematic review.                                                               | 12                 |

From: Moher D, Liberati A, Tetzlaff J, Altman DG, The PRISMA Group (2009). Preferred Reporting Items for Systematic Reviews and Meta-Analyses: The PRISMA Statement. PLoS Med 6(7): e1000097. doi:10.1371/journal.pmed1000097

For more information, visit: [www.prisma-statement.org](http://www.prisma-statement.org).

Page 2 of 2  
For peer review only - <http://bmjopen.bmj.com/site/about/guidelines.xhtml>

# Reporting checklist for meta-analysis of observational studies.

Based on the MOOSE guidelines.

## Instructions to authors

Complete this checklist by entering the page numbers from your manuscript where readers will find each of the items listed below.

Your article may not currently address all the items on the checklist. Please modify your text to include the missing information. If you are certain that an item does not apply, please write "n/a" and provide a short explanation.

Upload your completed checklist as an extra file when you submit to a journal.

In your methods section, say that you used the MOOSE reporting guidelines, and cite them as:

Stroup DF, Berlin JA, Morton SC, Olkin I, Williamson GD, Rennie D, Moher D, Becker BJ, Sipe TA, Thacker SB. Meta-analysis of observational studies in epidemiology: a proposal for reporting. Meta-analysis Of Observational Studies in Epidemiology (MOOSE) group. JAMA. 2000; 283(15):2008-2012.

|                    | Reporting Item                                                                                                 | Page Number |
|--------------------|----------------------------------------------------------------------------------------------------------------|-------------|
| <a href="#">#1</a> | Identify the study as a meta-analysis of observational research                                                | 1           |
| <a href="#">#2</a> | Provide a structured summary including, as applicable: background; objectives; data sources; study eligibility | 1&2         |

1 criteria, participants, and interventions; study appraisal and  
 2 synthesis methods; results; limitations; conclusions and  
 3 implications of key findings; systematic review registration  
 4 number (From PRISMA checklist)  
 5  
 6  
 7  
 8  
 9

|    |          |                     |                                                                 |     |
|----|----------|---------------------|-----------------------------------------------------------------|-----|
| 10 |          | <a href="#">#3a</a> | Problem definition                                              | 3   |
| 11 |          |                     |                                                                 |     |
| 12 |          | <a href="#">#3b</a> | Hypothesis statement                                            | 2   |
| 13 |          |                     |                                                                 |     |
| 14 |          | <a href="#">#3c</a> | Description of study outcomes                                   | 3-5 |
| 15 |          |                     |                                                                 |     |
| 16 |          | <a href="#">#3d</a> | Type of exposure or intervention used                           | 3-4 |
| 17 |          |                     |                                                                 |     |
| 18 |          | <a href="#">#3e</a> | Type of study designs used                                      | 3-4 |
| 19 |          |                     |                                                                 |     |
| 20 |          | <a href="#">#3f</a> | Study population                                                | 3-4 |
| 21 |          |                     |                                                                 |     |
| 22 |          |                     |                                                                 |     |
| 23 |          |                     |                                                                 |     |
| 24 |          |                     |                                                                 |     |
| 25 |          |                     |                                                                 |     |
| 26 |          |                     |                                                                 |     |
| 27 |          |                     |                                                                 |     |
| 28 |          |                     |                                                                 |     |
| 29 | Search   | <a href="#">#4a</a> | Qualifications of searchers (eg, librarians and investigators)  | 3-4 |
| 30 |          |                     |                                                                 |     |
| 31 | strategy |                     |                                                                 |     |
| 32 |          |                     |                                                                 |     |
| 33 |          |                     |                                                                 |     |
| 34 |          | <a href="#">#4b</a> | Search strategy, including time period included in the          | 3-4 |
| 35 |          |                     | synthesis and keywords                                          |     |
| 36 |          |                     |                                                                 |     |
| 37 |          |                     |                                                                 |     |
| 38 |          |                     |                                                                 |     |
| 39 |          | <a href="#">#4c</a> | Effort to include all available studies, including contact with | 4   |
| 40 |          |                     | authors                                                         |     |
| 41 |          |                     |                                                                 |     |
| 42 |          |                     |                                                                 |     |
| 43 |          |                     |                                                                 |     |
| 44 |          |                     |                                                                 |     |
| 45 |          | <a href="#">#4d</a> | Databases and registries searched                               | 3-4 |
| 46 |          |                     |                                                                 |     |
| 47 |          |                     |                                                                 |     |
| 48 |          | <a href="#">#4e</a> | Search software used, name and version, including special       | 4   |
| 49 |          |                     | features used (eg, explosion)                                   |     |
| 50 |          |                     |                                                                 |     |
| 51 |          |                     |                                                                 |     |
| 52 |          |                     |                                                                 |     |
| 53 |          | <a href="#">#4f</a> | Use of hand searching (eg, reference lists of obtained          | 3   |
| 54 |          |                     | articles)                                                       |     |
| 55 |          |                     |                                                                 |     |
| 56 |          |                     |                                                                 |     |
| 57 |          |                     |                                                                 |     |
| 58 |          |                     |                                                                 |     |
| 59 |          |                     |                                                                 |     |
| 60 |          |                     |                                                                 |     |

|    |                     |                                                                |                 |
|----|---------------------|----------------------------------------------------------------|-----------------|
| 1  | <a href="#">#4g</a> | List of citations located and those excluded, including        | 5&Supplementary |
| 2  |                     | justification                                                  | Tables          |
| 3  |                     |                                                                |                 |
| 4  |                     |                                                                |                 |
| 5  |                     |                                                                |                 |
| 6  | <a href="#">#4h</a> | Method of addressing articles published in languages other     | 4               |
| 7  |                     | than English                                                   |                 |
| 8  |                     |                                                                |                 |
| 9  |                     |                                                                |                 |
| 10 |                     |                                                                |                 |
| 11 |                     |                                                                |                 |
| 12 | <a href="#">#4i</a> | Method of handling abstracts and unpublished studies           | 3-4             |
| 13 |                     |                                                                |                 |
| 14 |                     |                                                                |                 |
| 15 | <a href="#">#4j</a> | Description of any contact with authors                        | NA              |
| 16 |                     |                                                                |                 |
| 17 |                     |                                                                |                 |
| 18 | <a href="#">#5a</a> | Description of relevance or appropriateness of studies         | 3&4             |
| 19 |                     | gathered for assessing the hypothesis to be tested             |                 |
| 20 |                     |                                                                |                 |
| 21 |                     |                                                                |                 |
| 22 |                     |                                                                |                 |
| 23 | <a href="#">#5b</a> | Rationale for the selection and coding of data (eg, sound      | 3&4             |
| 24 |                     | clinical principles or convenience)                            |                 |
| 25 |                     |                                                                |                 |
| 26 |                     |                                                                |                 |
| 27 |                     |                                                                |                 |
| 28 |                     |                                                                |                 |
| 29 | <a href="#">#5c</a> | Documentation of how data were classified and coded (eg,       | 3&4             |
| 30 |                     | multiple raters, blinding, and interrater reliability)         |                 |
| 31 |                     |                                                                |                 |
| 32 |                     |                                                                |                 |
| 33 |                     |                                                                |                 |
| 34 | <a href="#">#5d</a> | Assessment of confounding (eg, comparability of cases and      | 4&5             |
| 35 |                     | controls in studies where appropriate)                         |                 |
| 36 |                     |                                                                |                 |
| 37 |                     |                                                                |                 |
| 38 |                     |                                                                |                 |
| 39 |                     |                                                                |                 |
| 40 | <a href="#">#5e</a> | Assessment of study quality, including blinding of quality     | 4&5             |
| 41 |                     | assessors; stratification or regression on possible predictors |                 |
| 42 |                     | of study results                                               |                 |
| 43 |                     |                                                                |                 |
| 44 |                     |                                                                |                 |
| 45 |                     |                                                                |                 |
| 46 |                     |                                                                |                 |
| 47 | <a href="#">#5f</a> | Assessment of heterogeneity                                    | 4&5             |
| 48 |                     |                                                                |                 |
| 49 |                     |                                                                |                 |
| 50 | <a href="#">#5g</a> | Description of statistical methods (eg, complete description   | 4&5             |
| 51 |                     | of fixed or random effects models, justification of whether    |                 |
| 52 |                     | the chosen models account for predictors of study results,     |                 |
| 53 |                     |                                                                |                 |
| 54 |                     |                                                                |                 |
| 55 |                     |                                                                |                 |
| 56 |                     |                                                                |                 |
| 57 |                     |                                                                |                 |
| 58 |                     |                                                                |                 |
| 59 |                     |                                                                |                 |
| 60 |                     |                                                                |                 |



dose-response models, or cumulative meta-analysis) in

sufficient detail to be replicated

|    |                     |                                                              |
|----|---------------------|--------------------------------------------------------------|
| 1  |                     |                                                              |
| 2  |                     |                                                              |
| 3  |                     |                                                              |
| 4  |                     |                                                              |
| 5  |                     |                                                              |
| 6  | <a href="#">#5h</a> | Provision of appropriate tables and graphics                 |
| 7  |                     |                                                              |
| 8  |                     |                                                              |
| 9  |                     |                                                              |
| 10 |                     |                                                              |
| 11 | <a href="#">#6a</a> | Graphic summarizing individual study estimates and overall   |
| 12 |                     | estimate                                                     |
| 13 |                     |                                                              |
| 14 |                     |                                                              |
| 15 |                     |                                                              |
| 16 |                     |                                                              |
| 17 |                     |                                                              |
| 18 |                     |                                                              |
| 19 | <a href="#">#6b</a> | Table giving descriptive information for each study included |
| 20 |                     |                                                              |
| 21 |                     |                                                              |
| 22 | <a href="#">#6c</a> | Results of sensitivity testing (eg, subgroup analysis)       |
| 23 |                     |                                                              |
| 24 |                     |                                                              |
| 25 | <a href="#">#6d</a> | Indication of statistical uncertainty of findings            |
| 26 |                     |                                                              |
| 27 |                     |                                                              |
| 28 | <a href="#">#7a</a> | Quantitative assessment of bias (eg. publication bias)       |
| 29 |                     |                                                              |
| 30 |                     |                                                              |
| 31 | <a href="#">#7b</a> | Justification for exclusion (eg, exclusion of non-English-   |
| 32 |                     | language citations)                                          |
| 33 |                     |                                                              |
| 34 |                     |                                                              |
| 35 |                     |                                                              |
| 36 | <a href="#">#7c</a> | Assessment of quality of included studies                    |
| 37 |                     |                                                              |
| 38 |                     |                                                              |
| 39 | <a href="#">#8a</a> | Consideration of alternative explanations for observed       |
| 40 |                     | results                                                      |
| 41 |                     |                                                              |
| 42 |                     |                                                              |
| 43 |                     |                                                              |
| 44 |                     |                                                              |
| 45 | <a href="#">#8b</a> | Generalization of the conclusions (ie, appropriate for the   |
| 46 |                     | data presented and within the domain of the literature       |
| 47 |                     | review)                                                      |
| 48 |                     |                                                              |
| 49 |                     |                                                              |
| 50 |                     |                                                              |
| 51 |                     |                                                              |
| 52 |                     |                                                              |
| 53 | <a href="#">#8c</a> | Guidelines for future research                               |
| 54 |                     |                                                              |
| 55 |                     |                                                              |
| 56 | <a href="#">#8d</a> | Disclosure of funding source                                 |
| 57 |                     |                                                              |
| 58 |                     |                                                              |
| 59 |                     |                                                              |
| 60 |                     |                                                              |

1 Reproduced with permission from JAMA. 2000. 283(15):2008-2012. Copyright © 2000 American  
2  
3 Medical Association. All rights reserved. This checklist can be completed online using  
4  
5 <https://www.goodreports.org/>, a tool made by the [EQUATOR Network](#) in collaboration with  
6  
7 [Penelope.ai](#)  
8  
9  
10  
11  
12  
13  
14  
15  
16  
17  
18  
19  
20  
21  
22  
23  
24  
25  
26  
27  
28  
29  
30  
31  
32  
33  
34  
35  
36  
37  
38  
39  
40  
41  
42  
43  
44  
45  
46  
47  
48  
49  
50  
51  
52  
53  
54  
55  
56  
57  
58  
59  
60

For peer review only
